# Supplementary material for: Perceived barriers to smoking cessation in selected vulnerable groups: a systematic review of the qualitative and quantitative literature
Source: PubMed Central journal article supplement — BMJ Open. 2014 Dec 22;4(12):e006414. doi: 10.1136/bmjopen-2014-006414 (PMC4275698; doi:10.1136/bmjopen-2014-006414), 2014-12-22
Supplement: bmjopen-2014-006414.draft_revisions.pdf [file bmjopen-2014-006414.draft_revisions.pdf]

# BMJ Open

## Perceived barriers to smoking cessation in selected socioeconomically disadvantaged groups: A systematic review of the qualitative and quantitative literature.

|                                 |                                                                                                                                                                                                                                                                                                                                                                                                                                                                                                                                                                         |
|---------------------------------|-------------------------------------------------------------------------------------------------------------------------------------------------------------------------------------------------------------------------------------------------------------------------------------------------------------------------------------------------------------------------------------------------------------------------------------------------------------------------------------------------------------------------------------------------------------------------|
| Journal:                        | <i>BMJ Open</i>                                                                                                                                                                                                                                                                                                                                                                                                                                                                                                                                                         |
| Manuscript ID:                  | bmjopen-2014-006414                                                                                                                                                                                                                                                                                                                                                                                                                                                                                                                                                     |
| Article Type:                   | Research                                                                                                                                                                                                                                                                                                                                                                                                                                                                                                                                                                |
| Date Submitted by the Author:   | 25-Aug-2014                                                                                                                                                                                                                                                                                                                                                                                                                                                                                                                                                             |
| Complete List of Authors:       | Twyman, Laura; University of Newcastle, School of Medicine and Public Health<br>Bonevski, Billie; University of Newcastle, School of Medicine & Public Health<br>Paul, Chris; University of Newcastle, School of Medicine and Public Health; Hunter Medical Research Institute, Priority Research Centre for Health Behaviour and Health Behaviour Research Group<br>Bryant, Jamie; University of Newcastle, School of Medicine and Public Health; Hunter Medical Research Institute, Priority Research Centre for Health Behaviour and Health Behaviour Research Group |
| <b>Primary Subject Heading</b>: | Smoking and tobacco                                                                                                                                                                                                                                                                                                                                                                                                                                                                                                                                                     |
| Secondary Subject Heading:      | Smoking and tobacco                                                                                                                                                                                                                                                                                                                                                                                                                                                                                                                                                     |
| Keywords:                       | barriers, disadvantaged, review, smoking cessation                                                                                                                                                                                                                                                                                                                                                                                                                                                                                                                      |
|                                 |                                                                                                                                                                                                                                                                                                                                                                                                                                                                                                                                                                         |

SCHOLARONE™  
Manuscripts

Only

1  
2  
3 **Perceived barriers to smoking cessation in selected socioeconomically disadvantaged**  
4  
5 **groups: A systematic review of the qualitative and quantitative literature.**  
6  
7

8  
9 **Twyman, Laura,<sup>1\*</sup> Bonevski, Billie,<sup>1</sup> Paul, Chris,<sup>2</sup> & Bryant, Jamie.<sup>2</sup>**  
10

11 **<sup>1</sup>School of Medicine and Public Health, Faculty of Health, University of Newcastle,**  
12  
13 **Callaghan, NSW 2308, Australia.**  
14

15 **<sup>2</sup> Priority Research Centre for Health Behaviour and Health Behaviour Research**  
16  
17 **Group, University of Newcastle & Hunter Medical Research Institute**  
18  
19

20 **\*Correspondence to: Laura Twyman. Email: [Laura.Twyman@newcastle.edu.au](mailto:Laura.Twyman@newcastle.edu.au)**  
21

22 **Contact address: Level 5 McAuley building Calvary Mater Hospital Waratah Postcode:**  
23  
24 **2298 New South Wales Australia**  
25

26  
27 **Keywords:** smoking cessation, disadvantage, barriers, systematic review  
28

29  
30 **Word count:** 5474  
31  
32  
33  
34  
35  
36  
37  
38  
39  
40  
41  
42  
43  
44  
45  
46  
47  
48  
49  
50  
51  
52  
53  
54  
55  
56  
57  
58  
59  
60

## ABSTRACT

**Objectives:** To identify barriers which are common and unique to six selected disadvantaged groups: low income; Indigenous; mental illness and substance abuse; homeless; prisoners and at-risk youth.

**Design:** A systematic review was carried out to identify the perceived barriers to smoking cessation within six disadvantaged groups.

**Data sources:** Medline, EMBASE, CINAHL and PsycInfo were searched using keywords and MeSH terms from each database's inception published prior to March 2014.

**Study selection:** Studies that provided either qualitative or quantitative (i.e. longitudinal, cross-sectional or cohort surveys) descriptions of self-reported perceived barriers to quitting smoking in one of the six aforementioned disadvantaged groups were included.

**Data extraction:** Two authors independently assessed studies for inclusion and extracted data.

**Results:** 63 eligible papers were identified: 24 with low income groups, 16 with Indigenous groups, 17 involving people with a mental illness, three with homeless groups, two involving prisoners and one involving at risk youth. Barriers common to all disadvantaged groups included: smoking for stress management, lack of support from health and other service providers and the high prevalence and acceptability of smoking in disadvantaged communities. Unique barriers were identified for people with a mental illness (e.g. maintenance of mental health), Indigenous groups (e.g., cultural and historical norms), prisoners (e.g., living conditions), people who are homeless (e.g., competing priorities) and at risk youth (e.g., high accessibility of tobacco).

**Conclusions:** Disadvantaged groups experience common barriers to smoking cessation, in addition to barriers that are unique to specific disadvantaged groups. Individual-level and

1  
2  
3 community and social network-level interventions are priority areas for future smoking  
4  
5 cessation interventions within disadvantaged groups.  
6

7 **Trial registration:** A protocol for this review has been registered with PROSPERO  
8  
9 International Prospective Register of Systematic Reviews [Identifier: CRD42013005761].  
10  
11

12  
13  
14 **281**

15  
16  
17  
18 Strengths:

- 19  
20
- 21 • This study provides a valuable synthesis of the literature examining the perceived  
22 barriers to smoking cessation common and unique across six disadvantaged groups.  
23

24  
25 Limitations:

- 26  
27
- 28 • While the overall quality of the studies included in this review was acceptable, most  
29 studies failed to provide information regarding the trustworthiness (qualitative  
30 studies) or reliability and validity (quantitative studies) of the research  
31  
32
- 33  
34  
35  
36  
37  
38  
39  
40  
41  
42  
43  
44  
45  
46  
47  
48  
49  
50  
51  
52  
53  
54  
55  
56  
57  
58  
59  
60

## INTRODUCTION

Tobacco use is the leading global cause of avoidable death worldwide (1) and a key modifiable risk factor for the development of a range of diseases, including cardiovascular disease, chronic obstructive pulmonary disease, and some cancers (1).

The prevalence of tobacco smoking is inversely related to socioeconomic position in most high-income countries (1). For example, in 2010 in Australia, the prevalence of smoking was 24.6% in the lowest socioeconomic areas compared to 12.5% in the highest socioeconomic areas (2). The highest rates of smoking are evident amongst the most vulnerable groups, including Indigenous groups (31% - 51.8%) (3-5); people with a mental illness (31.7-32.4%) (6), those with substance abuse disorders (77%) (7); the homeless (73%) (8); and prisoners (78% - 84%) (9, 10).

While rates of *quit attempts* in lower socioeconomic groups are comparable to the general population (11, 12), the *success* rate is much lower (13, 14). There are many reasons quit success may be lower in disadvantaged groups (15). Within the health behaviour literature, factors that prevent an individual from undertaking health behaviour change have been referred to as barriers. Barriers are often conceptualised as either structural or individual psychosocial factors (16). Structural barriers include systems, organisations and the relationship between systems and individuals, for example lack of accessible smoking cessation programs. Individual barriers refer to the subjective experience of the individual, for example physical addiction to nicotine.

Within the general population, cross-sectional studies have found variation in the most commonly reported barriers to cessation. Enjoyment (79%)(17); cravings (75%) (17); and stress management (36% - 63%) (17, 18) are the most frequently reported barriers. Irritability (39% - 42%) (19); habit (39%) (18); withdrawal symptoms (28% - 48%) (17, 18);

1  
2  
3 fear of failure (17% - 32%) (17, 18) and concern about weight gain (27%-34%) (17-19) are  
4  
5 also identified as barriers to cessation.  
6

7  
8 The effect of socioeconomic position on perceived barriers to quitting was examined  
9  
10 in a representative sample (n = 2,133) in the United Kingdom (20). Enjoyment (51%) and  
11  
12 stress relief (47%) were the most frequently endorsed motives for continuing to smoke across  
13  
14 the sample; however stress management and avoiding boredom were associated with  
15  
16 decreasing socioeconomic position. This suggests that smokers from disadvantaged groups  
17  
18 may experience barriers to smoking cessation differently than those in the general population  
19  
20 (20).  
21

22  
23 Smoking in socioeconomically disadvantaged groups is known to be influenced and  
24  
25 perpetuated by a complex range of social, cultural and environmental factors (21) including  
26  
27 high acceptability of smoking (22) and higher retailing of tobacco in low socioeconomic  
28  
29 areas (23). Two previous studies have reviewed the literature to examine barriers to quitting  
30  
31 smoking amongst disadvantaged groups. One focussed on Aboriginal pregnant women (24),  
32  
33 and one focussed on the barriers to smoking cessation service utilisation amongst low income  
34  
35 smokers (25). Both reviews found pro-smoking social norms, inadequate knowledge  
36  
37 regarding smoking related risks, and lack of access to appropriate cessation services inhibited  
38  
39 participants' ability to quit.  
40  
41

42  
43 As the term disadvantage applies to multiple discrete groups, it is important to  
44  
45 understand which barriers (if any) are unique for example, cultural factors that inhibit  
46  
47 smoking cessation may be unique to some Indigenous groups (24). A systematic examination  
48  
49 of potential unique barriers would be valuable in order to develop and deliver appropriate  
50  
51 suites of intervention techniques for specific disadvantaged groups.  
52

53  
54 Understanding the perceived barriers to quitting is important in order to better  
55  
56 understand smoking, relapse and quitting related behaviours, to inform appropriate policy,  
57  
58  
59  
60

1  
2  
3 and facilitate the development of effective tailored smoking cessation interventions. Given  
4  
5 the exceptionally high smoking rates and low quit success amongst highly disadvantaged  
6  
7 groups, there is a critical need for a systematic and comprehensive review of the literature of  
8  
9 the perceived barriers to quitting smoking amongst socioeconomically disadvantaged  
10  
11 smokers.  
12

### 13 14 15 16 **Aims**

17  
18 This systematic review aims to provide a comprehensive synthesis of the self-reported  
19  
20 barriers to quitting smoking within six socioeconomically disadvantaged groups by reviewing  
21  
22 the qualitative and quantitative literature. The review will focus on the perceived, self-  
23  
24 reported barriers to smoking cessation in six selected disadvantaged groups: low income,  
25  
26 Indigenous, mental illness and substance abuse, homeless, prisoners, and at-risk youth. These  
27  
28 groups were selected because they represent a large proportion of those classified as  
29  
30 'socioeconomically disadvantaged' (26); who exhibit smoking rates higher than that of the  
31  
32 general population (2-10); and who are identified as priority groups targeted for smoking  
33  
34 cessation programs and policies by peak health authorities (27-29). Specifically, the review  
35  
36 aims to:  
37  
38  
39

- 40  
41  
42 a) identify barriers which are common across all disadvantaged groups included in the review  
43  
44 and  
45  
46  
47 b) identify barriers that may be unique to specific groups.  
48  
49

50  
51  
52 The results of the review will be used to develop a practical model to help understand the  
53  
54 barriers to quitting amongst disadvantaged groups and to aid smoking cessation intervention  
55  
56 development.  
57  
58  
59  
60

## METHOD

### Study design

Guidelines for the reporting of systematic reviews (PRISMA) (30) and qualitative synthesis (ENTREQ) (31) were followed. A protocol for this review was registered with PROSPERO International Prospective Register of Systematic Reviews [Identifier: CRD42013005761].

### Databases and search

Medline, EMBASE, CINAHL and PsycInfo were searched using keywords and MeSH terms from each database's inception published prior to March 2014. The reference lists of key articles and reviews were also manually searched in order to identify any other relevant articles. An extensive list of search terms was used in order to ensure that as many relevant articles as possible were captured (See Table 1).



Table 1. Search strategy

|    |    |                                                |
|----|----|------------------------------------------------|
| 1  | 1  | Tobacco/                                       |
| 2  | 2  | Tobacco use/                                   |
| 3  | 3  | Tobacco use cessation/                         |
| 4  | 4  | Tobacco smoking/                               |
| 5  | 5  | Smoking/                                       |
| 6  | 6  | Smoking Cessation/                             |
| 7  | 7  | Tobacco use cessation/                         |
| 8  | 8  | Tobacco dependence/                            |
| 9  | 9  | Cigarette smoking/                             |
| 10 | 10 | Or/1-9                                         |
| 11 | 11 | Homeless youth/                                |
| 12 | 12 | Homeless persons/                              |
| 13 | 13 | Housing/                                       |
| 14 | 14 | Homeless mentally ill/                         |
| 15 | 15 | Homelessness or homeless/                      |
| 16 | 16 | Community programs/                            |
| 17 | 17 | Or/11-16                                       |
| 18 | 18 | Prisoner or Prisons/                           |
| 19 | 19 | Correctional Health Services/                  |
| 20 | 20 | Correctional facilities/                       |
| 21 | 21 | Jail/                                          |
| 22 | 22 | Or/18-21                                       |
| 23 | 23 | Anxiety/                                       |
| 24 | 24 | Depression/                                    |
| 25 | 25 | Schizophrenia/                                 |
| 26 | 26 | Mentally Ill persons/                          |
| 27 | 27 | Mental health/                                 |
| 28 | 28 | Mental illness/                                |
| 29 | 29 | Mental disorder/                               |
| 30 | 30 | Mental disease/                                |
| 31 | 31 | Mental patient/                                |
| 32 | 32 | Mental health services/                        |
| 33 | 33 | Substance-related disorders/                   |
| 34 | 34 | Drug use/                                      |
| 35 | 35 | Drug abuse/                                    |
| 36 | 36 | Alcohol-related disorders/                     |
| 37 | 37 | Or/23-36                                       |
| 38 | 38 | Adolescent behaviour/                          |
| 39 | 39 | Juvenile delinquency/                          |
| 40 | 40 | Juvenile offenders/                            |
| 41 | 41 | Disruptive Behaviors or disruptive behaviours/ |
| 42 | 42 | At-risk youth/                                 |
| 43 | 43 | At-risk young people/                          |
| 44 | 44 | Or/38-43                                       |
| 45 | 45 | Indigenous/                                    |
| 46 | 46 | Indigenous health/                             |
| 47 | 47 | Indigenous peoples/                            |
| 48 | 48 | Indigenous populations/                        |
| 49 | 49 | Aboriginal/                                    |
| 50 | 50 | Aboriginal and Torres Strait Islanders/        |
| 51 | 51 | Inuits/                                        |
| 52 | 52 | Eskimo/                                        |
| 53 | 53 | Alaska Native/                                 |

1  
2  
3  
4  
5  
6  
7  
8  
9  
10  
11  
12  
13  
14  
15  
16  
17  
18  
19  
20  
21  
22  
23  
24  
25  
26  
27  
28  
29  
30  
31  
32  
33  
34  
35  
36  
37  
38  
39  
40  
41  
42  
43  
44  
45  
46  
47  
48  
49  
50  
51  
52  
53  
54  
55  
56  
57  
58  
59  
60

---

|    |                                                                                     |
|----|-------------------------------------------------------------------------------------|
| 54 | Indians/                                                                            |
| 55 | Native American/                                                                    |
| 56 | Native Hawaiian/                                                                    |
| 57 | American Indian/                                                                    |
| 58 | Indians, North American/                                                            |
| 59 | Indians, South American/                                                            |
| 60 | Indians, Central American/                                                          |
| 61 | First Nations/                                                                      |
| 62 | Pacific Islander/                                                                   |
| 63 | Maori/                                                                              |
| 64 | Oceanic ancestry group/                                                             |
| 65 | American Native Continental Ancestry Group/                                         |
| 66 | Or/45-65                                                                            |
| 67 | Poverty                                                                             |
| 68 | Social status                                                                       |
| 69 | Social class                                                                        |
| 70 | Low income population                                                               |
| 71 | Inequalities                                                                        |
| 72 | Socioeconomic status                                                                |
| 73 | Socioeconomic factors                                                               |
| 74 | Disadvantaged                                                                       |
| 75 | Underserved                                                                         |
| 76 | Or/67-75                                                                            |
| 77 | Related to smoking cessation/quitting smoking                                       |
| 78 | Correlated with smoking cessation/quitting smoking                                  |
| 79 | Associated with smoking cessation/quitting smoking                                  |
| 80 | That affect smoking cessation/quitting smoking                                      |
| 81 | That inhibit smoking cessation/quitting smoking                                     |
| 82 | That prevent smoking cessation/quitting smoking                                     |
| 83 | Barriers to smoking cessation/quitting smoking                                      |
| 84 | Factor\$ or Determinant\$ or Variable\$ or Covariable\$ or Predictor\$ or Barrier\$ |
| 85 | Or/77-84                                                                            |
| 86 | 10 AND 85 AND 17                                                                    |
| 87 | 10 AND 85 AND 22                                                                    |
| 88 | 10 AND 85 AND 37                                                                    |
| 89 | 10 AND 85 AND 44                                                                    |
| 90 | 10 AND 85 AND 66                                                                    |
| 91 | 10 AND 85 AND 76                                                                    |

---

### Inclusion and exclusion criteria

Studies that provided either qualitative or quantitative (i.e. longitudinal, cross-sectional or cohort surveys) descriptions of perceived self-reported barriers to quitting smoking in low income groups, Indigenous groups, people with a mental illness or substance

1  
2  
3 abuse problems, people who are homeless, prisoners or at-risk youth were included. See  
4  
5 Table 2 for definitions used as inclusion criteria for each disadvantaged group. Only studies  
6  
7 carried out in high income countries were included as middle and low income countries may  
8  
9 present different contextual, political and economic barriers which require separate  
10  
11 consideration. Only studies published in English were included as resources required to  
12  
13 translate articles were beyond the scope of this review. Intervention studies were excluded, as  
14  
15 barriers discussed within these studies related to use of the intervention being tested and not  
16  
17 barriers to smoking cessation per se. Studies examining factors associated with quit attempts  
18  
19 or success were excluded unless they included results on the perceived barriers self-reported  
20  
21 by participants from disadvantaged groups. Studies describing *provider* reports of the barriers  
22  
23 to the provision of smoking cessation support or treatment, and unpublished grey literature,  
24  
25 were also excluded. There were no cut offs for sample size.  
26  
27  
28  
29  
30  
31  
32  
33  
34  
35  
36  
37  
38  
39  
40  
41  
42  
43  
44  
45  
46  
47  
48  
49  
50  
51  
52  
53  
54  
55  
56  
57  
58  
59  
60

Table 2. Inclusion criteria definitions of each group.

| Group             | Definition                                                                                                                                                                                                                                                                                                                                                               |
|-------------------|--------------------------------------------------------------------------------------------------------------------------------------------------------------------------------------------------------------------------------------------------------------------------------------------------------------------------------------------------------------------------|
| Low income        | Because definitions of low income vary across high income countries this study used an inclusive definition of low income. Studies were included if they described participants as being socioeconomically disadvantaged and gave at least one measure of disadvantage. This measure could be income (above/below poverty level); address in deprived neighbourhood etc. |
| Indigenous groups | The following definition was used to define potential Indigenous studies in accordance with previous studies (32): “the experiences shared by a group of people who have inhabited a country for thousands of years, which often contrast with those of other groups residing in the same country for a few hundred years” (33).                                         |
| Mental Illness    | People with a mental illness were defined as individuals who had been diagnosed with a mental illness, severe mental illness or were described as inpatients or outpatients in a mental health rehabilitation facility. Substance use disorders were also included. All mental illnesses were included.                                                                  |
| At-risk youth     | At-risk youth were defined as individuals under the age of 21 who have experienced or are experiencing; problems at school; physical, sexual or psychological abuse; mental or physical health problems; economic disadvantage or who have committed a violent or delinquent act (USA Code).                                                                             |
| Prisoners         | Prisoners included both those currently incarcerated and those ex-prisoners living in the community.                                                                                                                                                                                                                                                                     |
| Homeless          | Homeless individuals were defined as those individuals described as meeting national criteria for homelessness or those individuals accessing services provided to homeless persons.                                                                                                                                                                                     |
| Smoker            | Smokers were defined as self-reported daily or occasional cigarette smokers. Studies that also assessed ex-smokers were only included if the majority of participants were current smokers, or if the results were reported by smoking status. Studies were excluded if they focussed solely on ex-smokers or non-smokers.                                               |

### **Data extraction**

The titles and abstracts of retrieved publications were assessed by one reviewer (LT) against eligibility criteria and excluded if they did not meet inclusion criteria. A second reviewer (a Research Assistant) independently assessed 20% of the returned abstracts for inclusion with 100% agreement between reviewers. Data from included journal articles was extracted into summary tables independently by one reviewer (LT) and a random 20% checked by a second (Research Assistant). Agreement was again high (97%). Discrepancies were settled by discussion between the reviewers. Data extracted from the articles included: study aims, setting, sample characteristics, response rates, study methodology, data analysis and the barriers identified. Barriers were defined as factors that prevented smoking cessation and/or quit attempts or were reported as primary reasons for continuing to smoke.

### **Risk of bias in individual studies**

Quality assessment was performed independently by all authors, with two reviewers per manuscript. The methodological quality of qualitative studies was assessed using the McMaster Qualitative Criteria Form (34). Quantitative studies were assessed using a tool adapted from the STROBE statement (35). As there is a lack of an agreed, valid and reliable measure to assess the quality of mixed methods studies (36), both the McMaster guidelines and the adapted quantitative framework were applied to the corresponding qualitative and quantitative components of any mixed methods studies identified.

### **Synthesis of results**

Results were synthesised by disadvantaged group using narrative synthesis and inductive data analysis techniques. Narrative synthesis allows the examination of studies that are highly heterogeneous in their research questions, samples and methods (37, 38). In order

1  
2  
3 to avoid potential biases, care was taken to also identify points of difference between studies  
4  
5 (39). Where a barrier was reported in more than one study, this was recorded. Barriers were  
6  
7 combined into categories and then classified using the Social Determinants of Health  
8  
9 Framework (SDHF) (40). The SDHF holds that an individual's health is influenced by factors  
10  
11 across many levels, from individual genetic and physical characteristics, to social and  
12  
13 community networks, and broader influences of culture, socioeconomic determinants and the  
14  
15 environment. This framework has been used to examine the determinants of health inequities  
16  
17 (41). Because the SDHF classifies determinants of health as individual, social and broader  
18  
19 cultural and environmental factors, it also allows the identification of distinct levels of  
20  
21 intervention for health policies and programs. For the purposes of this review, individual  
22  
23 factors were defined as physical or psychological barriers to quitting smoking: for example,  
24  
25 the individual's level of nicotine dependence or motivation to quit. Lifestyle factors were  
26  
27 defined as health behaviours (including alcohol and other drug use) that impeded an  
28  
29 individual's ability to quit. Social and community networks were defined as the impact of an  
30  
31 individual's family and friend networks, and the wider community. Living and working  
32  
33 conditions encompassed factors including housing, health care, education and employment.  
34  
35 The final domain was the broader socioeconomic, cultural and environmental background  
36  
37 perceived to influence smoking cessation.  
38  
39  
40  
41  
42  
43  
44

## 45 RESULTS

### 46 Search results

47  
48 After duplicates were removed, 21,765 studies were identified from electronic  
49  
50 searches and a further 27 from manual searches. Of those, 63 studies met inclusion criteria  
51  
52 and were included in the review (see Figure 1). Supplementary file 1 contains a list of full  
53  
54 text articles that were retrieved, reviewed and excluded as per the inclusion criteria. Two  
55  
56  
57  
58  
59  
60

1  
2  
3 systematic reviews concerning Indigenous Australian pregnant women (24) and pregnant  
4 women (42); and two critical reviews providing summaries of the barriers to quitting (25, 43)  
5  
6 were also identified from hand searches.  
7  
8  
9

### 10 11 12 **Study characteristics**

13  
14 The majority of studies (n = 24) identified barriers to smoking cessation in low  
15 income groups (22, 44-66), Indigenous groups (n = 16) (67-82), and people with a mental  
16 illness (n = 17) (83-99) including two concerning those with substance use disorders (96, 99).  
17  
18 Three studies reported barriers to quitting within the homeless (100-102) and two reported  
19 barriers within prisoner groups (103, 104). One study with at-risk youth was identified (105).  
20  
21 Two other studies concerning Alaska Native participants (age range from 11 to 18) (81) and  
22 people with a mental illness (age range from 16 to 23) (98) included younger people as  
23 participants. Supplementary files 2, 3 and 4 summarize the included quantitative, qualitative  
24 and mixed methods studies respectively. An overview of the characteristics of included  
25 studies can be found in Supplementary file 5.  
26  
27  
28  
29  
30  
31  
32  
33  
34  
35  
36  
37  
38

### 39 **Quality assessment of qualitative studies**

40 The results of the quality assessment of qualitative studies are presented in  
41 Supplementary file 6. Overall, the quality of studies varied widely. The majority of studies  
42 did not explicitly state their study design (n = 38); of those that did, most used Grounded  
43 Theory (52, 54, 56, 88, 93, 94). Most studies provided adequate descriptions of the study  
44 sites; participants; data collection methods and analysis techniques. Studies generally  
45 performed poorly when assessed on four components of trustworthiness, with only fifteen  
46 studies meeting all four criteria (credibility; transferability; dependability and confirmability)  
47 [41,44,48,50,58,60,64,65,68,69,72,73,75,76,84]. It should be noted that none of the mixed  
48  
49  
50  
51  
52  
53  
54  
55  
56  
57  
58  
59  
60

1  
2  
3 methods studies explicitly described their methodology as mixed methods nor did they report  
4  
5 integrating the qualitative and quantitative findings in a systematic way.  
6  
7

### 8 9 10 **Quality assessment of quantitative studies**

11  
12 The results of the quality assessment of quantitative studies are presented in  
13  
14 Supplementary file 7. Sample sizes in the quantitative studies ranged from 36 to 500  
15  
16 participants. Response rates ranged from 42% to over 97% (three studies did not provide  
17  
18 response rates) [70,91,92]. All but one study [81] clearly stated eligibility criteria. All studies  
19  
20 stated their outcome a priori and no conflicts of interest were identified. The validity and  
21  
22 reliability of survey measures used to assess barriers to cessation were reported in one study  
23  
24 [53]. Three studies employed techniques such as pilot testing and input from key stakeholders  
25  
26 in developing the tools used [53,77,95].  
27  
28

### 29 30 31 32 **Perceived barriers to smoking cessation**

33  
34 The barriers to quitting smoking endorsed over multiple studies included: smoking for  
35  
36 stress management; enjoyment of smoking; addiction to nicotine; habit; social acceptability  
37  
38 of smoking; lack of support to quit and access to quit resources; boredom; stressful life  
39  
40 factors; pro-smoking living environments; smoking cultural norms and socioeconomic  
41  
42 disadvantage. Figure 2 demonstrates the barriers reported in this review categorised by the  
43  
44 SDHF. For brevity, the current results section will focus on those barriers that were common  
45  
46 across all groups and unique to certain disadvantaged groups. Supplementary file 8 provides a  
47  
48 detailed description of all of the barriers identified in this review. Table 3 provides a  
49  
50 summary of the barriers extracted from the qualitative studies. References of studies that  
51  
52 report one or more barriers at a given level of the SDHF are included in Table 3. Table 4  
53  
54  
55  
56  
57  
58  
59  
60



1  
2  
3 provides a summary of the results of quantitative studies including the proportion of  
4  
5 participants endorsing the barrier and the study reference.  
6  
7  
8

### 9 10 **Barriers common across all groups**

11 Three barriers were present in all six disadvantaged groups included in this review: 1)  
12 stress management, 2) lack of support to quit from health professionals and other service  
13 providers, and 3) high prevalence and acceptability of smoking within disadvantaged  
14 communities.  
15  
16  
17  
18  
19

20 Within the SDHF, stress management was categorised as an individual level barrier.  
21  
22 Thirty eight qualitative studies identified stress management as a significant barrier to  
23 smoking cessation (45-51, 53, 54, 56-58, 60, 62-64, 67, 69, 70, 75, 76, 78, 79, 81, 82, 84, 85,  
24 87, 88, 90-92, 94, 95, 98, 102, 104, 105). Smoking was used as a coping mechanism (47, 53,  
25 57-60, 64, 69, 84, 85, 87, 92, 94) in reaction to daily stressors as well as the stress inherent in  
26 disadvantaged lives. Three quantitative studies reported stress management as a barrier to  
27 quitting with Maori participants (48%) (74), participants with substance use disorders (39%)  
28 (99) and homeless participants (44%) (101). Of note, participants in two studies reported that  
29 smoking also directly contributed to the stress experienced by participants (46, 105).  
30 Participants also reported using smoking to manage their emotions and mood (53, 60, 67, 78,  
31 79, 85, 88, 93, 98, 106). Twenty three percent of participants from a Maori sample indicated  
32 managing emotions was a barrier to quitting (74), 42% of individuals with a substance use  
33 disorder (96).  
34  
35  
36  
37  
38  
39  
40  
41  
42  
43  
44  
45  
46  
47  
48

49 High prevalence and acceptability of smoking within disadvantaged communities was  
50 categorised as a community and social network level barrier. Eight qualitative (48, 49, 64, 70,  
51 74, 75, 93, 105) and four quantitative (55, 96, 101, 103) studies found that being around other  
52 smokers was a barrier to quitting. This finding is reinforced by participants describing the  
53  
54  
55  
56  
57  
58  
59  
60

1  
2  
3 high prevalence of smoking amongst family and friends in 21 studies (22, 46, 47, 51, 57, 63,  
4  
5 64, 67, 69, 71, 76, 78, 80-82, 85, 88, 90, 91, 98, 105) and in the wider community in 17  
6  
7 studies (22, 46, 47, 51, 57, 61, 64, 67, 69, 71, 76, 78, 80-82, 88, 91). Tobacco was readily  
8  
9 available and easily accessible within disadvantaged communities (46, 57, 61, 71, 78, 85, 86,  
10  
11 105) and smoking was considered to be a highly acceptable (22, 74, 76-78, 80-82) and  
12  
13 normalised behaviour (47, 51, 57, 61, 64, 74, 76-78, 80, 82).

16  
17 Lack of support to quit from health and other service providers to quit was also  
18  
19 categorised as a social and community network barrier. Other service providers include  
20  
21 management and staff in prisons, homeless shelters and organisations, and members of the  
22  
23 community. Twelve qualitative studies (47, 50, 51, 53, 69, 72, 78, 81, 86, 87, 90, 102) and  
24  
25 one quantitative study (103) reported a perceived lack of support from health professionals  
26  
27 regarding smoking cessation. Cases of family members and health professionals actively  
28  
29 discouraging quit attempts and encouraging maintenance of smoking due to concerns about  
30  
31 the individual's mental health (87, 88, 90, 91) or because smoking was perceived to be the  
32  
33 individual's only source of enjoyment (49, 72, 74, 78) were reported. Three studies identified  
34  
35 tobacco use by health professionals and others involved in the participants' care as a barrier  
36  
37 to cessation (72, 90, 103). Over half (55.9%) of prisoners surveyed reported observing  
38  
39 members of staff smoking as a barrier to quitting (103). Studies involving people with a  
40  
41 mental illness and prisoners identified use of cigarettes in order to reward or punish  
42  
43 behaviour by health professionals and other service providers (88, 90, 91, 104) as a barrier to  
44  
45 quitting. Twenty-nine percent of prisoners also indicated that not receiving cessation support  
46  
47 from prison staff prevented them from quitting smoking (103). Twenty-six percent of  
48  
49 substance abusing individuals reported they did not have enough support to quit. One study  
50  
51 involving at risk youth identified smoking being unaddressed by teachers and members of the  
52  
53 police force as a barrier to smoking cessation (105).

Table 3. A summary of the self-reported barriers to smoking cessation – qualitative and mixed methods studies by disadvantaged group.

| Barrier                                 | Low income groups (n = 22)      | Indigenous groups (n =16 )           | People with a mental illness(n=13) | Homeless groups (n = 3) | Prisoner groups (n = 2) | At risk youth (n = 1) |
|-----------------------------------------|---------------------------------|--------------------------------------|------------------------------------|-------------------------|-------------------------|-----------------------|
| <b>Individual and lifestyle factors</b> |                                 |                                      |                                    |                         |                         |                       |
| Stress management                       | (45-54, 56-58, 60-64)           | (67, 69, 70, 74, 76, 78, 79, 81, 82) | (84, 85, 87, 88, 90-94)            | (102)                   | (104)                   | (105)                 |
| Enjoyment                               | (45, 49-51, 54, 57, 58, 60, 62) | (74, 76-78)                          | (84, 85, 87-89, 92, 93)            |                         |                         | (105)                 |
| Addiction                               | (44, 45, 49, 52, 54, 62-64)     | (67, 69, 70, 76, 78, 79, 81)         | (85-87, 93)                        |                         |                         |                       |
| Habit                                   | (45, 52, 60, 63)                | (70, 74, 78, 79)                     | (87)                               |                         |                         |                       |
| Mental health benefits                  | (53, 62)                        | (69)                                 | (84, 86-94)                        |                         |                         |                       |
| Weight gain                             | (22, 44, 47-49, 59, 62)         | (67, 69, 79)                         | (86, 93)                           |                         |                         |                       |
| Competing priorities                    | (51, 58)                        | (69, 70, 82)                         | (84, 86, 93, 94)                   | (102)                   |                         |                       |
| Rationalisations                        | (49-51, 53, 56, 62)             | (69, 73, 77, 82)                     | (84, 92)                           |                         |                         |                       |
| Other substance use                     | (44, 51, 54, 57)                | (69, 71, 76, 79)                     | (84)                               |                         |                         |                       |
| Autonomy                                | (51, 53, 63)                    | (78)                                 | (88, 92-94)                        |                         |                         |                       |
| Low confidence                          | (47, 48, 51, 58, 62, 64)        | (68, 79)                             | (87, 91, 93)                       |                         |                         |                       |
| Cognitive benefits                      | (46)                            | (78)                                 | (88-90)                            |                         |                         |                       |
| Loneliness                              | (47, 54, 60)                    |                                      | (88, 92, 93)                       |                         |                         |                       |
| Low risk of harm                        | (53)                            | (82)                                 | (90, 92)                           |                         |                         |                       |
| Low motivation                          |                                 |                                      | (87, 89, 92, 93)                   |                         |                         |                       |
| Past failed attempts                    | (56)                            | (69)                                 |                                    |                         |                         |                       |
| Positive smoker image                   | (22, 52)                        |                                      | (92)                               |                         |                         |                       |
| <b>Social and community networks</b>    |                                 |                                      |                                    |                         |                         |                       |
| Prevalence and acceptability            | (22, 46-49, 51, 57, 61, 63, 64) | (67, 69, 71, 74, 78, 80-82)          | (85, 86, 88, 90, 91)               | (102)                   | (104)                   | (105)                 |
| Lack of social support                  | (22, 44, 49-51, 53, 59, 62-64)  | (69, 70, 72, 74, 78, 79)             | (86, 89, 93)                       | (102)                   |                         |                       |

|                                                          |                              |                           |                              |       |       |       |
|----------------------------------------------------------|------------------------------|---------------------------|------------------------------|-------|-------|-------|
| Social activity                                          | (22, 44, 48, 52, 57)         | (68-70, 74, 80, 82)       | (84, 85, 87, 88, 90, 92, 93) |       |       |       |
| Lack of health and other professional support            | (47, 49-51, 53)              | (69, 72, 74, 78, 81)      | (86-88, 90, 91)              | (102) | (104) | (105) |
| <b>Living and working conditions</b>                     |                              |                           |                              |       |       |       |
| Access to quit resources                                 | (47, 50, 51, 56-58)          | (67-69, 73, 76, 81, 107)  | (88, 91, 93)                 | (102) | (104) |       |
| Boredom                                                  | (45-47, 49-51, 54, 60)       | (70, 81)                  | (85, 89, 90, 92, 94)         | (102) | (104) |       |
| Concerns regarding treatment                             | (45, 47, 51, 53, 56-58, 64)  | (67-69, 72, 73, 76, 81)   | (86, 88, 91)                 | (102) |       |       |
| Stressful factors                                        | (51, 53, 54, 57, 58, 60, 63) | (69, 70, 80)              |                              |       | (104) |       |
| Living and working circumstances                         | (22, 49, 53)                 | (69)                      | (91)                         |       |       |       |
| Social and geographical isolation                        | (51, 57, 59)                 | (80)                      |                              |       |       |       |
| <b>Cultural, socioeconomic and environmental factors</b> |                              |                           |                              |       |       |       |
| Cultural norms                                           | (51, 57)                     | (67-70, 73, 76-78, 80-82) | (88, 89, 93)                 |       | (104) |       |
| Socioeconomic factors                                    | (60)                         |                           | (92)                         |       |       |       |

### Barriers unique to certain disadvantaged groups

Indigenous; prisoner; mentally ill, homeless, and at risk youth reported unique barriers to smoking cessation. Racism, historical factors (69, 70, 80), ceremonial use of tobacco (67, 68, 77, 80, 81), cultural values that promote sharing, kinship, and reciprocity (78), cultural values of pride, independence and self-reliance that affect help seeking behaviour (76, 77), cultural values concerning health and privacy (79), and maintenance of cultural identity (68-70, 77, 78, 80) were identified as barriers within Indigenous groups. Smoking cessation could therefore exclude an individual from fully participating in their culture or potentially challenge family, personal or community relationships.

1  
2  
3 Living environments and the stressful context of prison presented unique barriers for  
4  
5 prisoners, including social isolation, anxiety regarding legal matters, transfers to other  
6  
7 prisons, use of cigarettes as a currency, use of cigarettes as a way to reward or punish  
8  
9 behaviour, bullying, missing family and restricted movement throughout the day (104).  
10

11 Low levels of motivation (87, 89, 92, 93), concerns about ability of cessation services  
12  
13 to handle mental health issues(86, 88, 91), identity and belonging(88, 89, 93) and symptom  
14  
15 management (83-93) were barriers for people with mental illness.  
16  
17

18 Competing needs and prioritising need to find shelter/place to live were unique  
19  
20 barriers for individual who were homeless (102). Very high levels of accessibility of  
21  
22 cigarettes within the community were identified by one study with at risk youth as a unique  
23  
24 barrier (104).  
25  
26  
27  
28  
29  
30  
31  
32  
33  
34  
35  
36  
37  
38  
39  
40  
41  
42  
43  
44  
45  
46  
47  
48  
49  
50  
51  
52  
53  
54  
55  
56  
57  
58  
59  
60

Table 4. A summary of the barriers to smoking cessation – reported prevalence of each barrier by disadvantaged group for studies using quantitative and mixed methods<sup>ab</sup>.

| Barrier                                 | Reported prevalence of each barrier N/Total N (%) |                                   |                                                                                                                                   |                              |                         |
|-----------------------------------------|---------------------------------------------------|-----------------------------------|-----------------------------------------------------------------------------------------------------------------------------------|------------------------------|-------------------------|
|                                         | Low income groups (n = 1)                         | Indigenous groups (n = 1)         | People with a mental illness (n = 3)                                                                                              | Homeless groups (n = 2)      | Prisoner groups (n = 1) |
| <b>Individual and lifestyle factors</b> |                                                   |                                   |                                                                                                                                   |                              |                         |
| Stress management                       |                                                   | 63/130 (48) <sup>(74)</sup>       | 30/78 (39) <sup>(99)</sup>                                                                                                        | 82/186 (44) <sup>(101)</sup> |                         |
| Relaxation                              | 261/500 (52) <sup>(55)</sup>                      | 22/130 (17) <sup>(74)</sup>       | 13/30 (42) <sup>(95)</sup><br>7/72 (10) <sup>(83)</sup>                                                                           |                              |                         |
| Enjoyment                               |                                                   | 33/130 (25) <sup>(74)</sup>       | 34/72 (47) <sup>(83)</sup><br>21/105 (20) <sup>(85)</sup><br>30/78 (39) <sup>(99)</sup>                                           |                              |                         |
| Addiction                               | 431/500 (86) <sup>(55)</sup>                      | 51/130 (39) <sup>(74)</sup>       | 56 (53) <sup>(85)</sup><br>10/30 (33) <sup>(95)</sup>                                                                             | 93/186 (50) <sup>(101)</sup> |                         |
| Cravings                                |                                                   |                                   | 53/78 (68) <sup>(99)</sup><br>47/96 (48) <sup>(96)</sup>                                                                          |                              |                         |
| Withdrawal symptoms                     |                                                   |                                   | 85/96 (87) <sup>(96)</sup>                                                                                                        |                              |                         |
| Habit                                   | 411/500 (82) <sup>(55)</sup>                      | 95/130 (73) <sup>(74)</sup>       | 26/72 (36) <sup>(83)</sup><br>20/105 (19) <sup>(85)</sup><br>17/30 (58) <sup>(95)</sup>                                           |                              |                         |
| Perceived Mental Health Benefits        |                                                   | 6 – 30/130 (5-23) <sup>(74)</sup> | 21/105 (20) <sup>(85)</sup><br>7 – 8/72 (10-11) <sup>(83)</sup><br>41/78 (53) <sup>(99)</sup><br>41-76/96 (42-78) <sup>(96)</sup> |                              |                         |
| Concentration                           |                                                   |                                   | 27-56/96 (28-55) <sup>(96)</sup>                                                                                                  |                              |                         |
| Low levels of motivation                | 131/350 (38) <sup>(65)</sup>                      |                                   | 46/96 (47) <sup>(96)</sup>                                                                                                        |                              |                         |
| Weight gain                             | 69/350 (20) <sup>(65)</sup>                       | 6/130 (5) <sup>(74)</sup>         | 3/72 (4) <sup>(83)</sup><br>39/96 (40) <sup>(96)</sup>                                                                            | 38/186 (20) <sup>(101)</sup> |                         |
| Other substance use                     |                                                   |                                   | 3/72 (4) <sup>(83)</sup><br>2-8/78 (3-10) <sup>(99)</sup><br>13-40/96 (13-41) <sup>(96)</sup>                                     |                              |                         |
| Problems getting to sleep               |                                                   |                                   | 23/96 (23) <sup>(96)</sup>                                                                                                        |                              |                         |
| Low confidence                          | 87 - 202/350                                      |                                   | 22/78 (24) <sup>(99)</sup>                                                                                                        |                              | 25/34 (74)              |

|                                               |                                                                    |                             |                                                                                          |                                                                         |                                |
|-----------------------------------------------|--------------------------------------------------------------------|-----------------------------|------------------------------------------------------------------------------------------|-------------------------------------------------------------------------|--------------------------------|
| and perceived difficulty                      | (25 - 58) <sup>(65)</sup>                                          |                             |                                                                                          |                                                                         | (103)                          |
| <b>Social and community networks</b>          |                                                                    |                             |                                                                                          |                                                                         |                                |
| High prevalence and acceptability I community | 332/500 (66)<br><sub>(55)</sub><br>116/350 (33)<br><sub>(65)</sub> | 5/130 (12) <sup>(74)</sup>  | 13/105 (13)<br><sub>(85)</sub><br>5/72 (7) <sup>(83)</sup><br>34/78 (43) <sup>(99)</sup> | 78/186 (42)<br><sub>(101)</sub>                                         | 27/34 (79)<br><sub>(103)</sub> |
| Lack of social support                        | 90/350 (26)<br><sub>(65)</sub>                                     |                             |                                                                                          | 48/186 (26)<br><sub>(101)</sub><br>70-79/98<br>(71-79) <sup>(100)</sup> | 10/34 (29)<br><sub>(103)</sub> |
| Lack of health and other professional support |                                                                    |                             | 3/72 (4) <sup>(83)</sup>                                                                 |                                                                         | 19/34 (56)<br><sub>(103)</sub> |
| Social activity                               |                                                                    | 44/130 (34) <sup>(74)</sup> | 17/30 (58)<br><sub>(95)</sub><br>2/72 (3) <sup>(83)</sup>                                |                                                                         |                                |
| Availability of cigarettes                    |                                                                    | 5/130 (4) <sup>(74)</sup>   | 8/105 (8) <sup>(85)</sup><br>5/72 (7) <sup>(83)</sup>                                    |                                                                         |                                |
| <b>Living and working conditions</b>          |                                                                    |                             |                                                                                          |                                                                         |                                |
| Access to quit resources                      | 108/350<br>(31) <sup>(65)</sup>                                    |                             |                                                                                          |                                                                         | 9/34 (27) <sup>(103)</sup>     |
| Boredom                                       | 242/500 (48)<br><sub>(55)</sub>                                    | 38/130 (29) <sup>(74)</sup> | 9/72 (13) <sup>(83)</sup><br>13/105 (13)<br><sub>(85)</sub>                              |                                                                         |                                |
| Stressful factors                             |                                                                    |                             | 4/72 (6) <sup>(83)</sup>                                                                 |                                                                         |                                |
| Living environments                           |                                                                    |                             |                                                                                          |                                                                         | 20 (59) <sup>(103)</sup>       |

<sup>a</sup> Decimals rounded to nearest whole number where appropriate.

<sup>b</sup> Numerators/denominators are presented first, followed by proportion (in parentheses), followed by reference.

## DISCUSSION

This is the first systematic review reporting perceived barriers to smoking cessation across a range of disadvantaged groups. The findings from 52 qualitative, eight quantitative and three mixed methods studies demonstrate that barriers to quitting smoking operate at multiple levels including individual and lifestyle factors; social and community networks; living conditions; and cultural and socioeconomic factors. These include: smoking for stress management; enjoyment of smoking; addiction to nicotine; habit; social acceptability of smoking; lack of support to quit and access to quit resources; boredom; stressful life factors; pro-smoking living environments; cultural norms and socioeconomic disadvantage. Stress management, lack of support from health professionals and other service providers and the high prevalence and acceptability of smoking in communities were the three barriers common across all six disadvantaged groups included in this review.

The identified barriers broadly reflect those reported in two systematic reviews limited to pregnant smokers (42) and Indigenous Australian pregnant smokers (24) and two critical reviews providing summaries of the challenges to cessation amongst low income smokers (25) and low income; rural; homeless; hard core; immigrant and HIV positive smokers (43). Addiction to nicotine, habit, stress management, enjoyment and weight gain are typically reported barriers to smoking cessation within the general population (18-20, 108). No studies were found that directly compared barriers experienced by disadvantaged groups and smokers in the general population. To the authors knowledge, only one study has assessed the effect of socioeconomic position on barriers to quitting smoking and identified that decreasing SEP was associated with higher likelihood of reporting stress management and boredom as barriers (20). This review did not aim to provide direct comparisons between disadvantaged groups and the general population due to the heterogeneity of studies. Additionally, comparisons by gender were beyond the scope of this review, but should be



1  
2  
3 considered for further research, as disadvantage has differential effects on males and females  
4  
5 (15) and preliminary evidence suggests barriers to cessation may differ by gender (65).  
6

7  
8 Nevertheless, the results of this review indicate that disadvantaged smokers report a  
9  
10 number of additional barriers to cessation that operate within their social and community  
11  
12 networks; living conditions; and wider cultural and socioeconomic contexts. Social and  
13  
14 community barriers include: lack of support to quit from both peers and health and other  
15  
16 professionals; high prevalence and acceptability of smoking within disadvantaged  
17  
18 communities and smoking as a social activity. Living conditions include: stressful factors;  
19  
20 pro-smoking living and working circumstances; lack of access to quit resources; social and  
21  
22 geographical isolation and boredom. Cultural norms and socioeconomic disadvantage also  
23  
24 presented barriers to quitting.  
25  
26  
27  
28

### 29 30 **Main barriers identified across all disadvantaged groups**

#### 31 32 *Stress management*

33  
34 Stress management was a frequently reported individual level barrier. Smokers  
35  
36 typically demonstrate higher levels of stress and low mood than non-smokers and ex-smokers  
37  
38 (109-111). Smoking may provide a coping mechanism for individuals who are prone to  
39  
40 higher levels of stress (112-114) or smoking may act as a stressor due to neurobiological  
41  
42 processes or through the experience of withdrawal symptoms (114). Stressors associated with  
43  
44 disadvantage (for example unemployment, financial stress, and poverty) may compound  
45  
46 stress levels within disadvantaged groups. Given that disadvantaged smokers may be more  
47  
48 likely to report smoking in order to relieve stress (20) incorporating stress management  
49  
50 techniques into interventions targeted at disadvantaged groups may help to increase cessation.  
51  
52

#### 53 54 *Lack of support to quit from health professionals and other service providers*

1  
2  
3 At the social and community level, a lack of support to quit from health professionals  
4 and other service providers was identified. This reflects research that suggests disadvantaged  
5 smokers are less likely to receive advice to quit from a healthcare provider than their more  
6 advantaged counterparts (115), despite evidence demonstrating brief advice can increase the  
7 likelihood of successful quitting (116, 117). Both organisational and individual factors affect  
8 the provision of quit advice by health and other service providers. These include lack of time,  
9 confidence, knowledge and counselling skills (118). Efforts should be focussed on improving  
10 health professionals' ability to offer quit advice and may benefit from examining how best to  
11 ensure compliance to existing guidelines that provide clear recommendations on identifying  
12 individuals who are at higher risk of smoking and addressing the unique issues that these  
13 individuals face.  
14  
15  
16  
17  
18  
19  
20  
21  
22  
23  
24  
25  
26

27 Tailoring interventions to the specific needs of disadvantaged groups may be  
28 effective. Tailored interventions for behaviour change have been found to be effective  
29 compared to no intervention or dissemination of guidelines or educational materials alone  
30 [92]. Given that this review identified three common barriers across the six disadvantaged  
31 groups include in this review, we argue that subsequent smoking cessation interventions in  
32 disadvantaged groups should seek to address these factors. Programs should include specific  
33 modules on stress management techniques and how best to combat stress in disadvantaged  
34 settings as well as educating smokers about how stress relief and relief from nicotine  
35 withdrawal symptoms can be confounded.  
36  
37  
38  
39  
40  
41  
42  
43  
44  
45  
46

47 Smoking cessation interventions should be designed to maximise participation by  
48 disadvantaged individuals, addressing the key barriers around acceptability and access to  
49 interventions. Utilising existing services and organisations that are highly accessed by  
50 disadvantaged groups and are a trusted source of help for disadvantaged groups is also  
51 necessary. There is accumulating evidence that social and community service organisations  
52  
53  
54  
55  
56  
57  
58  
59  
60

(SCSOs) are well placed to provide brief smoking cessation advice to clients from very disadvantaged backgrounds (119, 120).

### *High prevalence and acceptability of smoking*

The high prevalence and social acceptability of smoking within disadvantaged communities was frequently reported. Considerable measures have been taken to address the denormalisation of smoking in the general population through regulation and legislative changes such as restrictions in advertising, smoke-free environment policies and point of sale restriction (1, 121, 122). Participants who were homeless, experiencing mental illness and prisoners cited a lack of restrictions on smoking within their living environments (or lack of enforcement of existing policies) as a factor that reinforced their smoking. While there are challenges associated with their implementation, smoke free areas can be successfully implemented within mental health treatment centres and prisons (123-125) and there is potential to extend these restrictions to homeless shelters and public housing developments.

Efforts to encourage the denormalisation of smoking in the environments of disadvantaged communities require further exploration. Providing access to acceptable and effective behavioural and pharmacological supports should ensure that denormalisation does not result in compounding stigma and further isolating disadvantaged groups (121, 126).

### **Barriers specific to certain groups**

#### *Indigenous groups*

Indigenous groups identified unique stressors linked to smoking including racism and historical factors; cultural practices including ceremonial use of tobacco and cultural values that promote sharing, kinship and reciprocity and the importance of smoking as a way to maintain cultural identity. Cultural values also had effects on the willingness of Indigenous participants to access smoking support services. Certain Indigenous groups may be less likely to receive advice to quit or engage with services designed to aid in cessation (127). However,

1  
2  
3 it is important to note that smoking cessation programs have been shown to be effective  
4  
5 within Indigenous groups (106, 128). Culturally appropriate interventions tailored to the  
6  
7 needs of Indigenous smokers should continue to be developed, implemented and evaluated.  
8  
9 These programs should acknowledge the cultural significance of tobacco use and the  
10  
11 important historical and social factors associated with Indigenous groups and smoking (129).

#### 14 *Prisoners*

15  
16 Prisoners identified unique stressors within their living conditions that contributed to  
17  
18 their smoking including social isolation, anxiety regarding legal matters and transfers to other  
19  
20 prisons. A recent multicomponent randomised controlled trial that included improving stress  
21  
22 management skills in prisoners found similar point prevalence abstinence rates as another  
23  
24 trial conducted with prisoners (9) and other community based studies (130, 131). Thus,  
25  
26 smoking cessation programs can be effective even in prison environments that are highly  
27  
28 conducive to smoking and should form a part of routine care within prison systems.  
29  
30

#### 31 *People with a mental illness*

32  
33 Low motivation to quit smoking was only reported in studies involving smokers with  
34  
35 a mental illness. This contradicts research showing no difference in motivation to quit  
36  
37 between those with severe mental illness and the general population (132). A recent review  
38  
39 concluded there is some evidence to suggest that individuals diagnosed with a psychotic  
40  
41 disorder are slightly less motivated to quit than those diagnosed with depression (132).  
42  
43 Possible reasons for this include the symptoms associated with schizophrenia (including  
44  
45 amotivation), management of side effects of medications (including Parkinsonism), limited  
46  
47 support systems, low perceived vulnerability to smoking related disease, lack of alternate  
48  
49 coping mechanisms and poverty (132, 133). Information on the diagnoses of participants was  
50  
51 only reported in one of the studies reporting motivation as a barrier in this review (87) where  
52  
53 the majority of participants were diagnosed with a psychotic disorder. However, other studies  
54  
55  
56  
57  
58  
59  
60

1  
2  
3 did not provide information on participants' diagnoses and further exploration is beyond the  
4  
5 scope of this review.  
6

7  
8 Symptom management also presented a significant barrier within studies concerning  
9  
10 people with a mental illness. There is evidence to suggest that biochemical processes between  
11  
12 nicotine and other substances in tobacco improve some symptoms of mental illness (133).  
13  
14 Additionally, smokers who are mentally ill may be more likely to misattribute their  
15  
16 withdrawal symptoms as recurring mental illness symptoms. Further investigation and  
17  
18 education regarding cessation and symptom management with people with a mental illness is  
19  
20 warranted. Integrating smoking cessation care with mental health and addiction treatments  
21  
22 can be effective at promoting cessation rates in groups with mental illness (134, 135).  
23  
24 However, future studies need to investigate ways to maintain long term smoking cessation as  
25  
26 well as systems-level changes that may support smoking cessation in people with mental  
27  
28 illness (125, 136).  
29  
30

### 31 32 **Barriers to smoking cessation in disadvantaged groups: a model**

33  
34 Figure 2 visually demonstrates the broad range of barriers to cessation reported by  
35  
36 disadvantaged groups, many of which exist outside of the realm of the individual. This model  
37  
38 demonstrates the interconnectedness of individual and lifestyle factors with the wider social  
39  
40 and community factors, living conditions and cultural, socioeconomic and environmental  
41  
42 factors. The two darker spheres holding social and community networks and individual and  
43  
44 lifestyle factors identify those factors that are potentially modifiable through short term health  
45  
46 behaviour change interventions. This model does not provide an exhaustive list of all of the  
47  
48 factors that prevent disadvantaged individuals from smoking cessation. It does provide a  
49  
50 framework for understanding the perceived self-reported barriers to quitting smoking  
51  
52 identified in this review.  
53  
54  
55  
56  
57  
58  
59  
60

### Strengths and limitations

This synthesis of the literature provides evidence of the perceived barriers to smoking cessation by examining the methodological quality of studies and comparing between and within selected disadvantaged groups. However, this review has some limitations. While the overall quality of the studies included in this review was acceptable, most qualitative studies failed to provide information regarding the trustworthiness of the research and most quantitative studies failed to provide information on the validity and reliability of the measures used to assess barriers. Of quantitative studies included, the majority used convenience samples. It is not generally feasible to target disadvantaged and hard to reach populations using random population sampling procedures. This limits the generalizability and transferability of the included studies to wider disadvantaged populations. Nevertheless, the agreement in findings between qualitative studies does suggest that these results are robust.

The nature of the studies included in this review means that no weight is given to the different barriers and the authors cannot provide comment on which, if any, barriers should be made a priority to target in smoking cessation interventions with disadvantaged groups. Given limited resources and funds, addressing all barriers is rarely possible. Future research is needed to identify those barriers which are most important to address first and to prioritise resourcing and intervention development.

The results of this review were broadly categorised according to the SDHF, however these categories are not mutually exclusive and certain barriers were able to be included in multiple categories (for example stress and stressful factors could be categorised as either individual level barriers or barriers within the living conditions level).

Similarly, as this review sought to provide a summary of disadvantaged smokers' perceived self-reported barriers to cessation, other barriers which may be important

1  
2  
3 determinants of quit attempts and success were not considered. Barriers such as the  
4  
5 knowledge and attitudes of staff and health professionals and the capacity of services to offer  
6  
7 smoking cessation programs, which have been identified within the literature (118), should  
8  
9 also be considered when examining the challenges facing disadvantaged groups.  
10

11  
12 This review was only able to identify four studies that examined the barriers to  
13  
14 quitting smoking within prisoner (n=2 studies) and homeless (n=2) groups and one study  
15  
16 focussing on at-risk youth. These results indicate more research is required with these groups  
17  
18 to examine the barriers to smoking cessation. More studies investigating the barriers to  
19  
20 cessation within these groups may lead to identification of additional common and unique  
21  
22 barriers across disadvantaged groups. Additionally, this review was limited to studies  
23  
24 conducted within one of six disadvantaged groups. Other disadvantaged groups that show  
25  
26 high rates of smoking include lesbian, gay, bisexual and transgender groups (137); culturally  
27  
28 and linguistically diverse groups (138); and rural and remote communities (139). The authors  
29  
30 acknowledge the disparity in smoking prevalence in these groups, however their inclusion  
31  
32 was beyond the scope of this review. These groups may experience barriers to cessation  
33  
34 different to those experienced by the groups included in this review. It should also be noted  
35  
36 that individuals within the included groups often experience multiple forms of disadvantage  
37  
38 for example people who are homeless are more likely to experience a mental illness (140)  
39  
40 and Indigenous communities are more likely to be overrepresented in lower socioeconomic  
41  
42 positions (3).  
43  
44  
45  
46

## 47 **Conclusions**

48  
49 These results support findings that disadvantaged groups experience common barriers  
50  
51 to smoking cessation, and also barriers which are unique to specific disadvantaged groups.  
52  
53 Stress management, high prevalence and acceptability of smoking and lack of support to quit  
54  
55 were identified as priority areas for cessation research, program implementation and policy  
56  
57  
58  
59  
60

1  
2  
3 change. Many of the barriers identified within this review are modifiable through short term  
4 health behaviour change strategies. For heterogeneous groups of disadvantaged individuals,  
5 intervention development should seek to address those barriers common to all disadvantaged  
6 groups identified in this review. For relatively homogenous groups of disadvantaged  
7 individuals, interventions should seek to address the unique barriers faced by those groups in  
8 addition to those barriers identified as common to all disadvantaged groups.  
9  
10  
11  
12  
13  
14

15  
16 These findings, coupled with lower success rates in quitting within socioeconomically  
17 disadvantaged groups (12, 141), suggest that interventions with disadvantaged groups need to  
18 address wider social, community and cultural factors as well as individualised cessation  
19 support. Addressing the predictors of cessation found within the general population such as  
20 addiction, habit and enjoyment remain important for disadvantaged groups.  
21  
22  
23  
24  
25  
26  
27  
28  
29

### 30 **Acknowledgements:**

31 We are grateful for the research assistance of Ms Madeleine Randell and to Dr Michelle  
32 Anderson for providing valuable comment on draft manuscripts.  
33  
34

35  
36 **Contributorship statement:** All authors conceived the initial scope and subject of the  
37 review. LT carried out all searches, wrote up drafts and performed quality assessment. BB,  
38 CP and JB provided extensive feedback and contributions to drafts of the paper. All authors  
39 completed quality assessment of the included papers. BB and LT completed narrative  
40 synthesis. All authors have read and met the ICMJE criteria for authorship.  
41  
42  
43  
44  
45  
46

47 **Competing interests:** All authors have completed the Unified Competing Interest Form at  
48 [www.icmje.org/coi\\_disclosure.pdf](http://www.icmje.org/coi_disclosure.pdf) (available on request from the corresponding author) and declare  
49 that: no support from any organisation for the submitted work; no financial relationships with any  
50 organisations that might have an interest in the submitted work in the previous three years; no other  
51 relationships or activities that could appear to have influenced the submitted work.  
52  
53  
54  
55  
56  
57  
58  
59  
60



1  
2  
3 **Funding:** BB is supported by a Cancer Institute NSW Career Development Fellowship and a  
4 University of Newcastle Faculty of Health and Medicine Gladys M Brawn Career Development  
5 Fellowship. JB is supported by an Australian Research Council Post-Doctoral Industry Fellowship.  
6  
7 CP is supported by Newcastle Cancer Control Collaborative funding. LT is supported by a 50:50  
8 scholarship from the University of Newcastle Faculty of Health and Medicine and the Cancer Institute  
9 NSW.

10  
11  
12  
13  
14  
15 **Data sharing:** There are no additional data available.  
16  
17  
18  
19  
20  
21  
22  
23  
24  
25  
26  
27  
28  
29  
30  
31  
32  
33  
34  
35  
36  
37  
38  
39  
40  
41  
42  
43  
44  
45  
46  
47  
48  
49  
50  
51  
52  
53  
54  
55  
56  
57  
58  
59  
60

## REFERENCES

1. World Health Organization (WHO). WHO report on the Global Tobacco Epidemic. Geneva: 2008.
2. Australian Institute of Health and Welfare (AIHW). 2010 National Drug Strategy Household Survey: Detailed findings. Canberra: 2010 Contract No.: Cat. no. PHE145.
3. Australian Institute of Health and Welfare. The health and welfare of Australia's Aboriginal and Torres Strait Islander people, an overview 2011. Canberra: 2011 Contract No.: Cat. no. IHW 42.
4. Centers for Disease Control Prevention (CDCP). Current cigarette smoking among adults - United States, 2011. MMWR Morbidity and mortality weekly report. 2012;61(44):889-94. Epub 2012/11/09.
5. Statistics Canada. Canadian Community Health Survey 2000/01 Ottawa: Statistics Canada, 2001.
6. Lawrence D, Mitrou F, Zubrick SR. Smoking and mental illness: results from population surveys in Australia and the United States. BMC public health. 2009;9:285. Epub 2009/08/12.
7. Kelly P, Baker, AL., Deane, FP., Kay-Lambkin, FJ., Bonevski, B., Tregarthen, J. . Prevalence of smoking and other health risk factors in people attending residential substance abuse treatment. Drug Alcohol Rev. 2012;31(5):638-44. doi: 10.1111/j.465-3362.2012.00465.x. Epub 2012 May 30.
8. Baggett TP, Rigotti NA. Cigarette smoking and advice to quit in a national sample of homeless adults. American journal of preventive medicine. 2010;39(2):164-72. Epub 2010/07/14.
9. Cropsey K, Eldridge G, Weaver M, Villalobos G, Stitzer M, Best A. Smoking cessation intervention for female prisoners: addressing an urgent public health need. American journal of public health. 2008;98(10):1894-901. Epub 2008/08/16.
10. Indig D, Topp L, Ross B, Mamoon H, Border B, Kumar S, et al. 2009 NSW Inmate Health Survey: Key Findings Report Sydney: Justice Health, 2010.
11. Hyland A, Borland R, Li Q, Yong HH, McNeill A, Fong GT, et al. Individual-level predictors of cessation behaviours among participants in the International Tobacco Control (ITC) Four Country Survey. Tob Control. 2006;15 Suppl 3:iii83-94. Epub 2006/06/07.
12. Kotz D, West R. Explaining the social gradient in smoking cessation: it's not in the trying, but in the succeeding. Tobacco Control. 2009;18(1):43-6.
13. Giskes K, van Lenthe FJ, Turrell G, Brug J, Mackenbach JP. Smokers living in deprived areas are less likely to quit: a longitudinal follow-up. Tob Control. 2006;15(6):485-8. Epub 2006/11/30.
14. Kotz D, Fidler J, West R. Factors associated with the use of aids to cessation in English smokers. Addiction (Abingdon, England). 2009;104(8):1403-10. Epub 2009/06/25.
15. Graham H, Inskip HM, Francis B, Harman J. Pathways of disadvantage and smoking careers: evidence and policy implications. Journal of epidemiology and community health. 2006;60 Suppl 2:7-12. Epub 2007/08/22.
16. Melnyk KA. Barriers: a critical review of recent literature. Nursing research. 1988;37(4):196-201. Epub 1988/07/01.
17. Theobald W, Smith, SS., Fiore, M. . Insights: Smoking in Wisconsin. University of Wisconsin Medical School: UW Center for Tobacco Research and Intervention, 2002.
18. Guirguis AB, Ray SM, Zingone MM, Airee A, Franks AS, Keenum AJ. Smoking cessation: barriers to success and readiness to change. Tennessee medicine : journal of the Tennessee Medical Association. 2010;103(9):45-9. Epub 2010/12/09.
19. Orleans CT, Jepson C, Resch N, Rimer BK. Quitting motives and barriers among older smokers. The 1986 Adult Use of Tobacco Survey revisited. Cancer. 1994;74(7 Suppl):2055-61. Epub 1994/10/01.
20. Fidler JA, West R. Self-perceived smoking motives and their correlates in a general population sample. Nicotine & tobacco research : official journal of the Society for Research on Nicotine and Tobacco. 2009;11(10):1182-8. Epub 2009/07/31.
21. Poland B, Frohlich K, Haines RJ, Mykhalovskiy E, Rock M, Sparks R. The social context of smoking: the next frontier in tobacco control? Tob Control. 2006;15(1):59-63. Epub 2006/01/27.

22. Paul CL, Ross S, Bryant J, Hill W, Bonevski B, Keevy N. The social context of smoking: A qualitative study comparing smokers of high versus low socioeconomic position. *BMC public health*. 2010;10:211. Epub 2010/04/28.
23. Rodriguez D, Carlos HA, Adachi-Mejia AM, Berke EM, Sargent JD. Predictors of tobacco outlet density nationwide: a geographic analysis. *Tob Control*. 2013;22(5):349-55. Epub 2012/04/12.
24. Gould GS, Munn J, Watters T, McEwen A, Clough AR. Knowledge and views about maternal tobacco smoking and barriers for cessation in Aboriginal and Torres Strait Islanders: A systematic review and meta-ethnography. *Nicotine & tobacco research : official journal of the Society for Research on Nicotine and Tobacco*. 2013;15(5):863-74. Epub 2012/10/09.
25. Gollust SE, Schroeder SA, Warner KE. Helping smokers quit: understanding the barriers to utilization of smoking cessation services. *The Milbank quarterly*. 2008;86(4):601-27. Epub 2009/01/06.
26. Wiebel WW. Identifying and gaining access to hidden populations. *NIDA research monograph*. 1990;98:4-11. Epub 1990/01/01.
27. Australian National Preventive Health Agency. A priority-driven research agenda for tobacco control in Australia. 2013.
28. World Health Organisation. Report on the global tobacco epidemic, 2013. 2013.
29. U.S. Department of Health and Human Services. Ending the tobacco Epidemic: A tobacco control strategic action plan for the U.S. Department of Health and Human Services. In: Office of the Assistant Secretary for Health, editor. Washington, DC. November, 2010. .
30. Moher D, Liberati A, Tetzlaff J, Altman DG, Group P. Preferred reporting items for systematic reviews and meta-analyses: the PRISMA statement. *PLoS medicine*. 2009;6(7):e1000097. Epub 2009/07/22.
31. Tong A, Flemming K, McInnes E, Oliver S, Craig J. Enhancing transparency in reporting the synthesis of qualitative research: ENTREQ. *BMC medical research methodology*. 2012;12:181. Epub 2012/11/29.
32. Carson KV, Brinn MP, Peters M, Veale A, Esterman AJ, Smith BJ. Interventions for smoking cessation in Indigenous populations. *The Cochrane database of systematic reviews*. 2012;1:CD009046. Epub 2012/01/20.
33. Cunningham C, Stanley F. Indigenous by definition, experience, or world view. *BMJ (Clinical research ed)*. 2003;327(7412):403-4. Epub 2003/08/23.
34. Letts L, Wilkins S, Stewart D, Bosch J, Westmorland M. Critical Review Form - Qualitative Studies (Version 2.0). McMaster University; 2007; Available from: <http://www.fhs.mcmaster.ca/rehab/ebp/>.
35. Barley EA, Murray J, Walters P, Tylee A. Managing depression in primary care: A meta-synthesis of qualitative and quantitative research from the UK to identify barriers and facilitators. *BMC family practice*. 2011;12:47. Epub 2011/06/11.
36. O'Cathain A, Murphy E, Nicholl J. The quality of mixed methods studies in health services research. *Journal of health services research & policy*. 2008;13(2):92-8. Epub 2008/04/18.
37. Popay J, Roberts H, Sowden A, Petticrew M, Arai L, Rodgers M, et al. Guidance on the Conduct of Narrative Synthesis in Systematic Reviews. 2006.
38. Rumrill Jr PD, Fitzgerald SM. Using narrative literature reviews to build a scientific knowledge base. *Work (Reading, Mass)*. 2001;16(2):165-70. Epub 2002/11/21.
39. Denyer D, & Tranfield, D. Using qualitative research synthesis to build an actionable knowledge base. *Management Decision*. 2006;44(2):213-27.
40. Dahlgren G, & Whitehead, M. . Policies and strategies to promote equity in health. Copenhagen: 1992.
41. Marmot M. Social determinants of health inequalities. *Lancet*. 2005;365(9464):1099-104. Epub 2005/03/23.

- 1  
2  
3 42. Ingall G, Cropley M. Exploring the barriers of quitting smoking during pregnancy: a  
4 systematic review of qualitative studies. *Women and birth : journal of the Australian College of*  
5 *Midwives*. 2010;23(2):45-52. Epub 2009/11/03.
- 6 43. Browning K, Baker, CJ., McNally, GA., Wewers, ME. . *Nursing research in tobacco use and*  
7 *special populations*. *Annu Rev Nurs Res*. 2009;27:319-42.
- 8 44. Ahijevych K, Kuun P, Christman S, Wood T, Browning K, Wewers ME. Beliefs about tobacco  
9 among Appalachian current and former users. *Applied nursing research : ANR*. 2003;16(2):93-102.  
10 Epub 2003/05/24.
- 11 45. Bancroft A, Wiltshire S, Parry O, Amos A. "It's like an addiction first thing...afterwards it's like  
12 a habit": daily smoking behaviour among people living in areas of deprivation. *Social science &*  
13 *medicine* (1982). 2003;56(6):1261-7. Epub 2003/02/26.
- 14 46. Beech BM, Scarinci IC. Smoking attitudes and practices among low-income African-  
15 Americans: qualitative assessment of contributing factors. *American journal of health promotion :*  
16 *AJHP*. 2003;17(4):240-8. Epub 2003/03/19.
- 17 47. Bryant J, Bonevski B, Paul C, O'Brien J, Oakes W. Developing cessation interventions for the  
18 social and community service setting: a qualitative study of barriers to quitting among  
19 disadvantaged Australian smokers. *BMC public health*. 2011;11:493. Epub 2011/06/28.
- 20 48. Copeland L. An exploration of the problems faced by young women living in disadvantaged  
21 circumstances if they want to give up smoking: can more be done at general practice level? *Family*  
22 *practice*. 2003;20(4):393-400. Epub 2003/07/24.
- 23 49. Dunn CL, Pirie PL, Lando HA. Attitudes and perceptions related to smoking among pregnant  
24 and postpartum women in a low-income, multiethnic setting. *American journal of health promotion*  
25 *: AJHP*. 1998;12(4):267-74. Epub 1998/02/06.
- 26 50. Franco L, Welsby D, Eccleston P, Furber S. A qualitative study about smoking cessation with  
27 clients of community service organisations that work with disadvantaged families. *Health promotion*  
28 *journal of Australia : official journal of Australian Association of Health Promotion Professionals*.  
29 2011;22(2):153-5. Epub 2011/08/09.
- 30 51. Lacey LP, Manfredi C, Balch G, Warnecke RB, Allen K, Edwards C. Social support in smoking  
31 cessation among black women in Chicago public housing. *Public Health Rep*. 1993;108(3):387-94.
- 32 52. Moffatt J, Whip R, Moffatt J. *The Struggle to Quit: Barriers and Incentives to Smoking*  
33 *Cessation*. *Health Educ J*. 2004;63(2):101-12.
- 34 53. Nichter M, Nichter M, Muramoto M, Adrian S, Goldade K, Tesler L, et al. Smoking among  
35 low-income pregnant women: an ethnographic analysis. *Health education & behavior : the official*  
36 *publication of the Society for Public Health Education*. 2007;34(5):748-64. Epub 2007/01/04.
- 37 54. Peretti-Watel P, Constance J. "It's all we got left". Why poor smokers are less sensitive to  
38 cigarette price increases. *International journal of environmental research and public health*.  
39 2009;6(2):608-21. Epub 2009/05/15.
- 40 55. Price JH, Everett SA. Perceptions of lung cancer and smoking in an economically  
41 disadvantaged population. *Journal of community health*. 1994;19(5):361-75. Epub 1994/10/01.
- 42 56. Roddy E, Antoniak M, Britton J, Molyneux A, Lewis S. Barriers and motivators to gaining  
43 access to smoking cessation services amongst deprived smokers--a qualitative study. *BMC health*  
44 *services research*. 2006;6:147. Epub 2006/11/08.
- 45 57. Stead M, MacAskill S, MacKintosh AM, Reece J, Eadie D. "It's as if you're locked in":  
46 qualitative explanations for area effects on smoking in disadvantaged communities. *Health & place*.  
47 2001;7(4):333-43. Epub 2001/10/30.
- 48 58. Stewart MJ, Brosky G, Gillis A, Jackson S, Johnston G, Kirkland S, et al. Disadvantaged women  
49 and smoking. *Can J Public Health*. 1996;87(4):257-60.
- 50 59. Stewart MJ, Gillis A, Brosky G, Johnston G, Kirkland S, Leigh G, et al. Smoking among  
51 disadvantaged women: causes and cessation. *Can J Nurs Res*. 1996;28(1):41-60.
- 52  
53  
54  
55  
56  
57  
58  
59  
60

- 1  
2  
3 60. Stewart MJ, Greaves L, Kushner KE, Letourneau NL, Spitzer DL, Boscoe M. Where there is  
4 smoke, there is stress: low-income women identify support needs and preferences for smoking  
5 reduction. *Health care for women international*. 2011;32(5):359-83. Epub 2011/04/09.  
6  
7 61. Stillman FA, Bone L, Avila-Tang E, Smith K, Yancey N, Street C, et al. Barriers to smoking  
8 cessation in inner-city African American young adults. *American journal of public health*.  
9 2007;97(8):1405-8. Epub 2007/06/30.  
10 62. Tod AM. Barriers to smoking cessation in pregnancy: a qualitative study. *British journal of*  
11 *community nursing*. 2003;8(2):56-64. Epub 2003/02/18.  
12 63. Tsourtos G, Ward, PR., Muller, R. . Smoking and stress: the double edged sword of living in a  
13 disadvantaged area. *Australasian Medical Journal*. 2008;1(1).  
14 64. Wiltshire S, Bancroft A, Parry O, Amos A. 'I came back here and started smoking again':  
15 perceptions and experiences of quitting among disadvantaged smokers. *Health education research*.  
16 2003;18(3):292-303. Epub 2003/06/28.  
17 65. Rosenthal L, Carroll-Scott A, Earnshaw VA, Sackey N, O'Malley SS, Santilli A, et al. Targeting  
18 cessation: understanding barriers and motivations to quitting among urban adult daily tobacco  
19 smokers. *Addictive behaviors*. 2013;38(3):1639-42. Epub 2012/12/21.  
20 66. White S, Baird W. Disadvantaged former miners' perspectives on smoking cessation: A  
21 qualitative study. *Health Education Journal*. 2013;72(6):755-60.  
22 67. Burgess D, Fu SS, Joseph AM, Hatsukami DK, Solomon J, van Ryn M. Beliefs and experiences  
23 regarding smoking cessation among American Indians. *Nicotine & tobacco research : official journal*  
24 *of the Society for Research on Nicotine and Tobacco*. 2007;9 Suppl 1:S19-28. Epub 2007/03/17.  
25 68. Choi WS, Daley CM, James A, Thomas J, Schupbach R, Segraves M, et al. Beliefs and attitudes  
26 regarding smoking cessation among American Indians: a pilot study. *Ethnicity & disease*.  
27 2006;16(1):35-40. Epub 2006/04/08.  
28 69. Dawson AP, Cargo M, Stewart H, Chong A, Daniel M. Aboriginal health workers experience  
29 multilevel barriers to quitting smoking: a qualitative study. *International journal for equity in health*.  
30 2012;11:27. Epub 2012/05/25.  
31 70. Dawson AP, Cargo M, Stewart H, Chong A, Daniel M. "I know it's bad for me and yet I do it":  
32 exploring the factors that perpetuate smoking in Aboriginal Health Workers--a qualitative study.  
33 *BMC health services research*. 2012;12:102. Epub 2012/04/27.  
34 71. Dennis MK, Momper SL. "It's bad around here now": tobacco, alcohol and other drug use  
35 among American Indians living on a rural reservation. *Journal of ethnicity in substance abuse*.  
36 2012;11(2):130-48. Epub 2012/06/12.  
37 72. Fernandez C, Wilson D. Maori women's views on smoking cessation initiatives. *Nursing*  
38 *praxis in New Zealand inc*. 2008;24(2):27-40. Epub 2008/09/25.  
39 73. Fu SS, Burgess D, van Ryn M, Hatsukami DK, Solomon J, Joseph AM. Views on smoking  
40 cessation methods in ethnic minority communities: a qualitative investigation. *Preventive medicine*.  
41 2007;44(3):235-40. Epub 2006/12/19.  
42 74. Glover M. Analysing smoking using Te Whare Tapa Wha. *NZ J Psychol*. 2005;34(1):13-9.  
43 75. Gould GS, Munn J, Avuri S, Hoff S, Cadet-James Y, McEwen A, et al. "Nobody smokes in the  
44 house if there's a new baby in it": Aboriginal perspectives on tobacco smoking in pregnancy and in  
45 the household in regional NSW Australia. *Women and Birth*. 2013;26(4):246-53.  
46 76. Gryczynski J, Feldman R, Carter-Pokras O, Kanamori M, Chen L, Roth S. Contexts of tobacco  
47 use and perspectives on smoking cessation among a sample of urban American Indians. *Journal of*  
48 *health care for the poor and underserved*. 2010;21(2):544-58. Epub 2010/05/11.  
49 77. Hodge FS, Struthers R. Persistent smoking among Northern Plains Indians: lenient attitudes,  
50 low harm value, and partiality toward cigarette smoking. *Journal of cultural diversity*.  
51 2006;13(4):181-5. Epub 2007/03/07.  
52 78. Johnston V, Thomas DP. Smoking behaviours in a remote Australian Indigenous community:  
53 the influence of family and other factors. *Social science & medicine (1982)*. 2008;67(11):1708-16.  
54 Epub 2008/10/22.  
55  
56  
57  
58  
59  
60

- 1  
2  
3 79. Kaholokula J, L. BK, Santos JI, Chang HK. Culturally informed smoking cessation strategies for  
4 Native Hawaiians. *Nicotine & tobacco research : official journal of the Society for Research on*  
5 *Nicotine and Tobacco*. 2008;10(4):671-81. Epub 2009/03/21.
- 6 80. Passey ME, Gale JT, Sanson-Fisher RW. "It's almost expected": rural Australian Aboriginal  
7 women's reflections on smoking initiation and maintenance: a qualitative study. *BMC women's*  
8 *health*. 2011;11:55. Epub 2011/12/14.
- 9 81. Patten CA, Enoch C, Renner CC, Offord KP, Nevak C, Kelley SF, et al. Focus groups of Alaska  
10 Native adolescent tobacco users: preferences for tobacco cessation interventions and barriers to  
11 participation. *Health education & behavior : the official publication of the Society for Public Health*  
12 *Education*. 2009;36(4):711-23. Epub 2007/12/01.
- 13 82. Wood L, France K, Hunt K, Eades S, Slack-Smith L. Indigenous women and smoking during  
14 pregnancy: knowledge, cultural contexts and barriers to cessation. *Social science & medicine (1982)*.  
15 2008;66(11):2378-89. Epub 2008/03/04.
- 16 83. Carosella AM, Ossip-Klein DJ, Owens CA. Smoking attitudes, beliefs, and readiness to change  
17 among acute and long term care inpatients with psychiatric diagnoses. *Addictive behaviors*.  
18 1999;24(3):331-44. Epub 1999/07/10.
- 19 84. Davis K, Brunette M, Vorhies V, Ferron J, Whitley R. A qualitative study of how individuals  
20 with severe mental illness assess smoking risks. *Mental Health and Substance Use*. 2010;3(2):110-23.
- 21 85. Goldberg JO, Moll S, Washington A. Exploring the Challenge of Tobacco Use and  
22 Schizophrenia. *Psychiatric Rehabilitation Skills*. 1996;1(2):55-67.
- 23 86. Howard LM, Bekele D, Rowe M, Demilew J, Bewley S, Marteau TM. Smoking cessation in  
24 pregnant women with mental disorders: a cohort and nested qualitative study. *BJOG : an*  
25 *international journal of obstetrics and gynaecology*. 2013;120(3):362-70. Epub 2012/11/22.
- 26 87. Kerr S, Woods C, Knussen C, Watson H, Hunter R. Breaking the habit: a qualitative  
27 exploration of barriers and facilitators to smoking cessation in people with enduring mental health  
28 problems. *BMC public health*. 2013;13:221. Epub 2013/03/19.
- 29 88. Lawn SJ, Pols RG, Barber JG. Smoking and quitting: a qualitative study with community-living  
30 psychiatric clients. *Social science & medicine (1982)*. 2002;54(1):93-104. Epub 2002/02/01.
- 31 89. Lucksted A, Dixon LB, Sembly JB. A focus group pilot study of tobacco smoking among  
32 psychosocial rehabilitation clients. *Psychiatric services (Washington, DC)*. 2000;51(12):1544-8. Epub  
33 2000/11/30.
- 34 90. Morris CD, Waxmonsky JA, May MG, Giese AA. What do persons with mental illnesses need  
35 to quit smoking? Mental health consumer and provider perspectives. *Psychiatric rehabilitation*  
36 *journal*. 2009;32(4):276-84. Epub 2009/04/07.
- 37 91. Nawaz S, Frounfelker R, Ferron JC, Carpenter-Song EA, Davis K, Brunette MF. Smoking and  
38 Quitting Beliefs, Attitudes, and Behaviors Among Smokers With Severe Mental Illness From Three  
39 Race/Ethnicity Groups. *Journal of Dual Diagnosis*. 2012;8(3):180-7.
- 40 92. Snyder M, McDevitt J, Painter S. Smoking cessation and serious mental illness. *Archives of*  
41 *psychiatric nursing*. 2008;22(5):297-304. Epub 2008/09/24.
- 42 93. Solway ES. The lived experiences of tobacco use, dependence, and cessation: insights and  
43 perspectives of people with mental illness. *Health & social work*. 2011;36(1):19-32. Epub  
44 2011/03/31.
- 45 94. Tsourtos G, Ward PR, Muller R, Lawn S, Winefield AH, Hersh D, et al. The importance of  
46 resilience and stress to maintaining smoking abstinence and cessation: a qualitative study in  
47 Australia with people diagnosed with depression. *Health & social care in the community*.  
48 2011;19(3):299-306. Epub 2010/12/09.
- 49 95. Van Dongen CJ. Smoking and persistent mental illness: an exploratory study. *Journal of*  
50 *psychosocial nursing and mental health services*. 1999;37(11):26-34. Epub 1999/11/26.
- 51 96. Asher MK, Martin RA, Rohsenow DJ, MacKinnon SV, Traficante R, Monti PM. Perceived  
52 barriers to quitting smoking among alcohol dependent patients in treatment. *Journal of substance*  
53 *abuse treatment*. 2003;24(2):169-74. Epub 2003/05/15.
- 54  
55  
56  
57  
58  
59  
60

- 1
- 2
- 3 97. Clancy N, Zwar N, Richmond R. Depression, smoking and smoking cessation: A qualitative
- 4 study. *Family practice*. 2013;30(5):587-92.
- 5 98. Prochaska JJ, Fromont SC, Wa C, Matlow R, Ramo DE, Hall SM. Tobacco use and its
- 6 treatment among young people in mental health settings: A qualitative analysis. *Nicotine and*
- 7 *Tobacco Research*. 2013;15(8):1427-35.
- 8 99. Orleans CT, Hutchinson D. Tailoring nicotine addiction treatments for chemical dependency
- 9 patients. *Journal of substance abuse treatment*. 1993;10(2):197-208. Epub 1993/03/01.
- 10 100. Arnsten JH, Reid K, Bierer M, Rigotti N. Smoking behavior and interest in quitting among
- 11 homeless smokers. *Addictive behaviors*. 2004;29(6):1155-61. Epub 2004/07/09.
- 12 101. Connor SE, Cook RL, Herbert MI, Neal SM, Williams JT. Smoking cessation in a homeless
- 13 population: there is a will, but is there a way? *Journal of general internal medicine*. 2002;17(5):369-
- 14 72. Epub 2002/06/06.
- 15 102. Okuyemi KS, Caldwell AR, Thomas JL, Born W, Richter KP, Nollen N, et al. Homelessness and
- 16 smoking cessation: insights from focus groups. *Nicotine & tobacco research : official journal of the*
- 17 *Society for Research on Nicotine and Tobacco*. 2006;8(2):287-96. Epub 2006/06/13.
- 18 103. Dickens GL S, JH, Haw, CM. . Smoking in a forensic psychiatric service: a survey of inpatients'
- 19 views. *J Psychiatr Ment Health Nurs*. 2005;12(6):672-8; quiz 8.
- 20 104. Richmond R, Butler T, Wilhelm K, Wodak A, Cunningham M, Anderson I. Tobacco in prisons:
- 21 a focus group study. *Tob Control*. 2009;18(3):176-82. Epub 2009/02/04.
- 22 105. Lewis S, Russell A. Young smokers' narratives: public health, disadvantage and structural
- 23 violence. *Sociology of health & illness*. 2013;35(5):746-60.
- 24 106. Patten CA. Tobacco cessation intervention during pregnancy among Alaska Native women.
- 25 *Journal of cancer education : the official journal of the American Association for Cancer Education*.
- 26 2012;27 Suppl 1:S86-90. Epub 2012/02/09.
- 27 107. Wardman D, Quantz D, Tootoosis J, Khan N. Tobacco cessation drug therapy among
- 28 Canada's Aboriginal people. *Nicotine & tobacco research : official journal of the Society for Research*
- 29 *on Nicotine and Tobacco*. 2007;9(5):607-11. Epub 2007/04/25.
- 30 108. Bott MJ, Cobb AK, Scheibmeir MS, O'Connell KA. Quitting: Smokers Relate their Experiences.
- 31 *Qualitative Health Research*. 1997;7(2):255-69.
- 32 109. File SE, Dinnis AK, Heard JE, Irvine EE. Mood differences between male and female light
- 33 smokers and nonsmokers. *Pharmacology, biochemistry, and behavior*. 2002;72(3):681-9. Epub
- 34 2002/08/15.
- 35 110. Hajek P, Taylor T, McRobbie H. The effect of stopping smoking on perceived stress levels.
- 36 *Addiction (Abingdon, England)*. 2010;105(8):1466-71. Epub 2010/06/10.
- 37 111. Mulder I, Tjihuis M, Smit HA, Kromhout D. Smoking cessation and quality of life: the effect of
- 38 amount of smoking and time since quitting. *Preventive medicine*. 2001;33(6):653-60. Epub
- 39 2001/11/22.
- 40 112. Carmody TP. Affect regulation, nicotine addiction, and smoking cessation. *Journal of*
- 41 *psychoactive drugs*. 1992;24(2):111-22. Epub 1992/04/01.
- 42 113. DiFranza JR, Wellman RJ. A sensitization-homeostasis model of nicotine craving, withdrawal,
- 43 and tolerance: integrating the clinical and basic science literature. *Nicotine & tobacco research :*
- 44 *official journal of the Society for Research on Nicotine and Tobacco*. 2005;7(1):9-26. Epub
- 45 2005/04/05.
- 46 114. Parrott AC. Does cigarette smoking cause stress? *The American psychologist*.
- 47 1999;54(10):817-20. Epub 1999/11/30.
- 48 115. Browning KK, Ferketich AK, Salsberry PJ, Wewers ME. Socioeconomic disparity in provider-
- 49 delivered assistance to quit smoking. *Nicotine & tobacco research : official journal of the Society for*
- 50 *Research on Nicotine and Tobacco*. 2008;10(1):55-61. Epub 2008/01/12.
- 51 116. Aveyard P, Begh R, Parsons A, West R. Brief opportunistic smoking cessation interventions: a
- 52 systematic review and meta-analysis to compare advice to quit and offer of assistance. *Addiction*
- 53 (Abingdon, England). 2012;107(6):1066-73. Epub 2011/12/20.
- 54
- 55
- 56
- 57
- 58
- 59
- 60

- 1  
2  
3 117. Stead LF, Buitrago D, Preciado N, Sanchez G, Hartmann-Boyce J, Lancaster T. Physician  
4 advice for smoking cessation. The Cochrane database of systematic reviews. 2013;5:CD000165. Epub  
5 2013/06/04.
- 6 118. Stead M, Angus K, Holme I, Cohen D, Tait G, Team PER. Factors influencing European GPs'  
7 engagement in smoking cessation: a multi-country literature review. The British journal of general  
8 practice : the journal of the Royal College of General Practitioners. 2009;59(566):682-90. Epub  
9 2009/08/14.
- 10 119. Bryant J, Bonevski B, Paul C, Hull P, O'Brien J. Implementing a smoking cessation program in  
11 social and community service organisations: a feasibility and acceptability trial. Drug and alcohol  
12 review. 2012;31(5):678-84. Epub 2011/12/08.
- 13 120. Christiansen BA, Brooks M, Keller PA, Theobald WE, Fiore MC. Closing tobacco-related  
14 disparities: Using community organizations to increase consumer demand. American journal of  
15 preventive medicine. 2010;38(3 Suppl):S397-402. Epub 2010/03/05.
- 16 121. Bell K, Salmon A, Bowers M, Bell J, McCullough L. Smoking, stigma and tobacco  
17 'denormalization': Further reflections on the use of stigma as a public health tool. A commentary on  
18 Social Science & Medicine's Stigma, Prejudice, Discrimination and Health Special Issue (67: 3). Social  
19 science & medicine (1982). 2010;70(6):795-9; discussion 800-1. Epub 2010/01/02.
- 20 122. Lavack L. Denormalization of tobacco in Canada. Social Marketing Quarterly. 1999;5(3):82-5.
- 21 123. El-Guebaly N, Cathcart J, Currie S, Brown D, Gloster S. Public health and therapeutic aspects  
22 of smoking bans in mental health and addiction settings. Psychiatric services (Washington, DC).  
23 2002;53(12):1617-22. Epub 2002/12/04.
- 24 124. Williams JM, Ziedonis D. Addressing tobacco among individuals with a mental illness or an  
25 addiction. Addictive behaviors. 2004;29(6):1067-83. Epub 2004/07/09.
- 26 125. Ziedonis DM, Guydish J, Williams J, Steinberg M, Foulds J. Barriers and solutions to  
27 addressing tobacco dependence in addiction treatment programs. Alcohol research & health : the  
28 journal of the National Institute on Alcohol Abuse and Alcoholism. 2006;29(3):228-35. Epub  
29 2007/03/22.
- 30 126. Frohlich KL, Mykhalovskiy E, Poland BD, Haines-Saah R, Johnson J. Creating the socially  
31 marginalised youth smoker: the role of tobacco control. Sociology of health & illness.  
32 2012;34(7):978-93. Epub 2012/03/06.
- 33 127. Cosh S, Maksimovic L, Ettridge K, Copley D, Bowden JA. Aboriginal and Torres Strait Islander  
34 utilisation of the Quitline service for smoking cessation in South Australia. Australian Journal of  
35 Primary Health. 2013;19(2):113-8.
- 36 128. Bramley D, Riddell T, Whittaker R, Corbett T, Lin RB, Wills M, et al. Smoking cessation using  
37 mobile phone text messaging is as effective in Maori as non-Maori. The New Zealand medical  
38 journal. 2005;118(1216):U1494. Epub 2005/06/07.
- 39 129. Daley CM, James AS, Barnoskie RS, Segraves M, Schupbach R, Choi WS. "Tobacco has a  
40 purpose, not just a past": Feasibility of developing a culturally appropriate smoking cessation  
41 program for a pan-tribal native population. Medical anthropology quarterly. 2006;20(4):421-40.  
42 Epub 2007/01/18.
- 43 130. Richmond R, Indig D, Butler T, Wilhelm K, Archer V, Wodak A. A randomized controlled trial  
44 of a smoking cessation intervention conducted among prisoners. Addiction (Abingdon, England).  
45 2013;108(5):966-74. Epub 2012/12/12.
- 46 131. Richmond RL, Butler T, Belcher JM, Wodak A, Wilhelm KA, Baxter E. Promoting smoking  
47 cessation among prisoners: feasibility of a multi-component intervention. Australian and New  
48 Zealand journal of public health. 2006;30(5):474-8. Epub 2006/11/01.
- 49 132. Siru R, Hulse GK, Tait RJ. Assessing motivation to quit smoking in people with mental illness:  
50 a review. Addiction (Abingdon, England). 2009;104(5):719-33. Epub 2009/05/06.
- 51 133. Dani JA, Harris RA. Nicotine addiction and comorbidity with alcohol abuse and mental illness.  
52 Nature neuroscience. 2005;8(11):1465-70. Epub 2005/10/28.
- 53  
54  
55  
56  
57  
58  
59  
60



- 1  
2  
3 134. Carmody TP, Delucchi K, Duncan CL, Banys P, Simon JA, Solkowitz SN, et al. Intensive  
4 intervention for alcohol-dependent smokers in early recovery: a randomized trial. *Drug and alcohol*  
5 *dependence*. 2012;122(3):186-94. Epub 2011/10/22.
- 6 135. McFall M, Saxon AJ, Malte CA, Chow B, Bailey S, Baker DG, et al. Integrating tobacco  
7 cessation into mental health care for posttraumatic stress disorder: a randomized controlled trial.  
8 *JAMA : the journal of the American Medical Association*. 2010;304(22):2485-93. Epub 2010/12/09.
- 9 136. Prochaska JJ. Integrating tobacco treatment into mental health settings. *JAMA : the journal*  
10 *of the American Medical Association*. 2010;304(22):2534-5. Epub 2010/12/09.
- 11 137. Gruskin EP, Greenwood GL, Matevia M, Pollack LM, Bye LL. Disparities in smoking between  
12 the lesbian, gay, and bisexual population and the general population in California. *American journal*  
13 *of public health*. 2007;97(8):1496-502. Epub 2007/06/30.
- 14 138. Weber MF, Banks E, Sitas F. Smoking in migrants in New South Wales, Australia: Report on  
15 data from over 100 000 participants in the 45 and Up Study. *Drug and alcohol review*.  
16 2011;30(6):597-605.
- 17 139. Substance Abuse and Mental Health Services Administration OoAS. Results from the 2007  
18 National Survey on Drug Use and Health: National Findings Rockville, MD.: 2008 Contract No.: DHHS  
19 Publication No. SMA 08-4343.
- 20 140. Fazel S, Khosla V, Doll H, Geddes J. The prevalence of mental disorders among the homeless  
21 in western countries: systematic review and meta-regression analysis. *PLoS medicine*.  
22 2008;5(12):e225. Epub 2008/12/05.
- 23 141. West R, McEwen A, Bolling K, Owen L. Smoking cessation and smoking patterns in the  
24 general population: a 1-year follow-up. *Addiction (Abingdon, England)*. 2001;96(6):891-902. Epub  
25 2001/06/12.
- 26  
27  
28  
29  
30  
31  
32  
33  
34  
35  
36  
37  
38  
39  
40  
41  
42  
43  
44  
45  
46  
47  
48  
49  
50  
51  
52  
53  
54  
55  
56  
57  
58  
59  
60

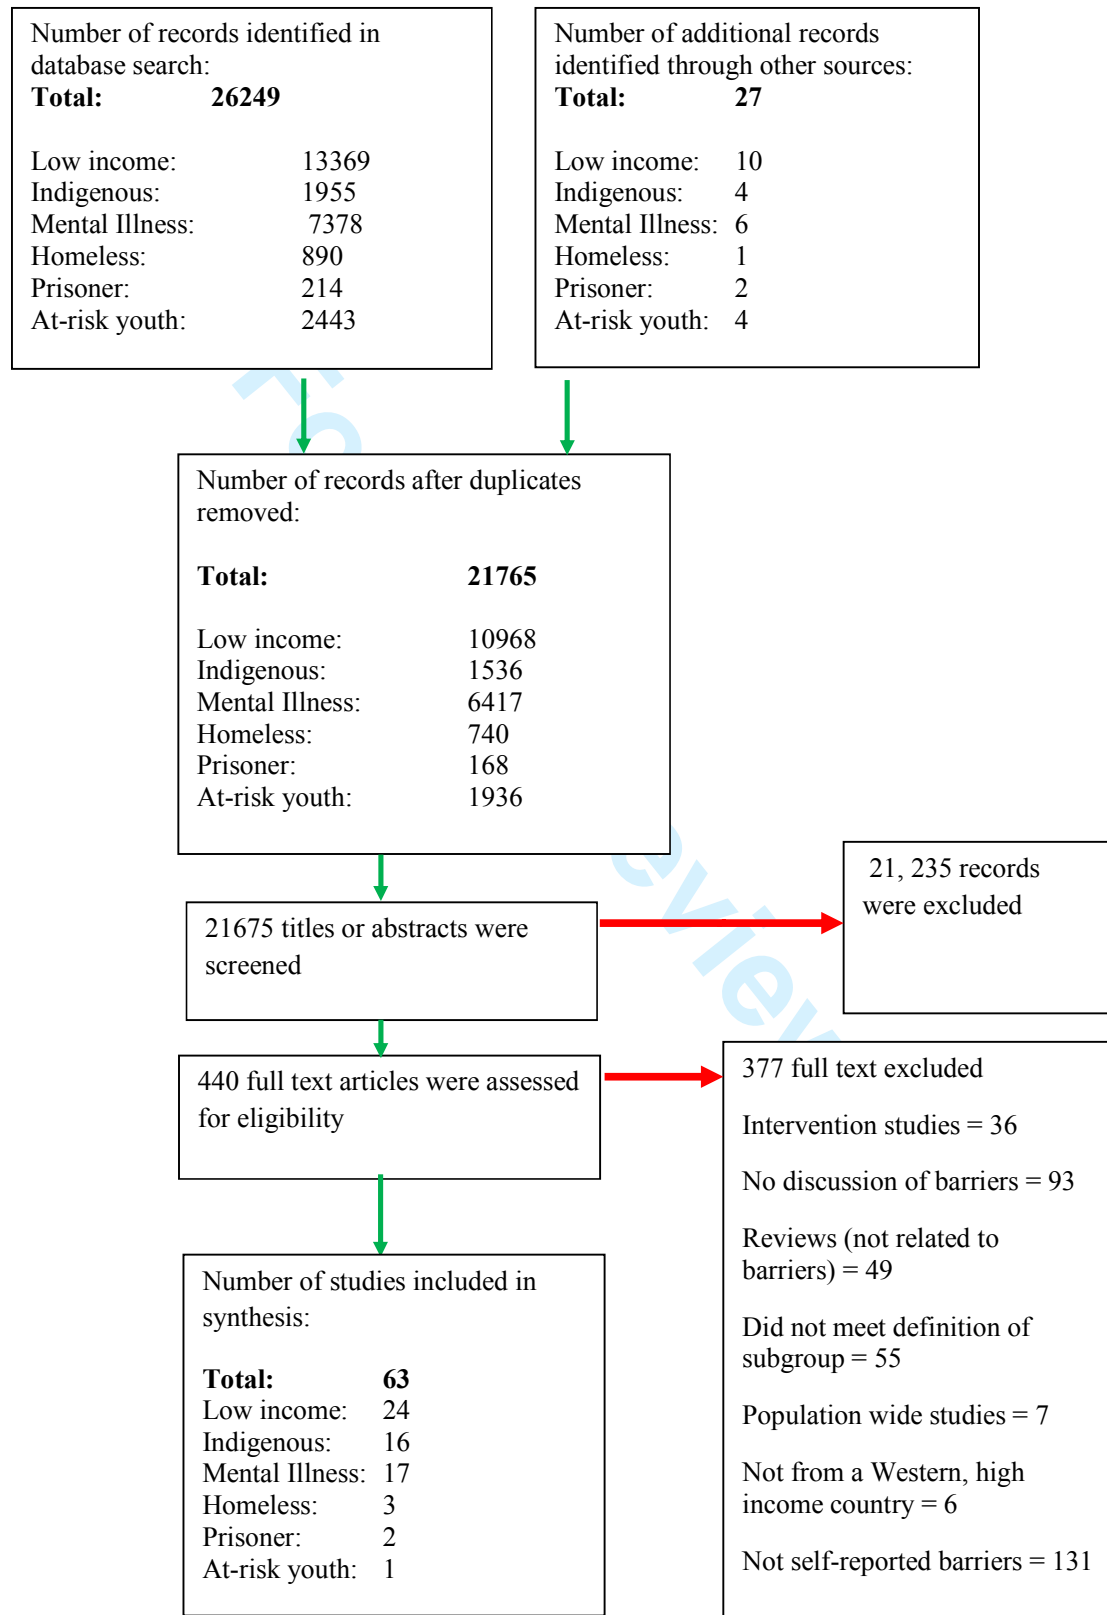

Figure 1. Database search results

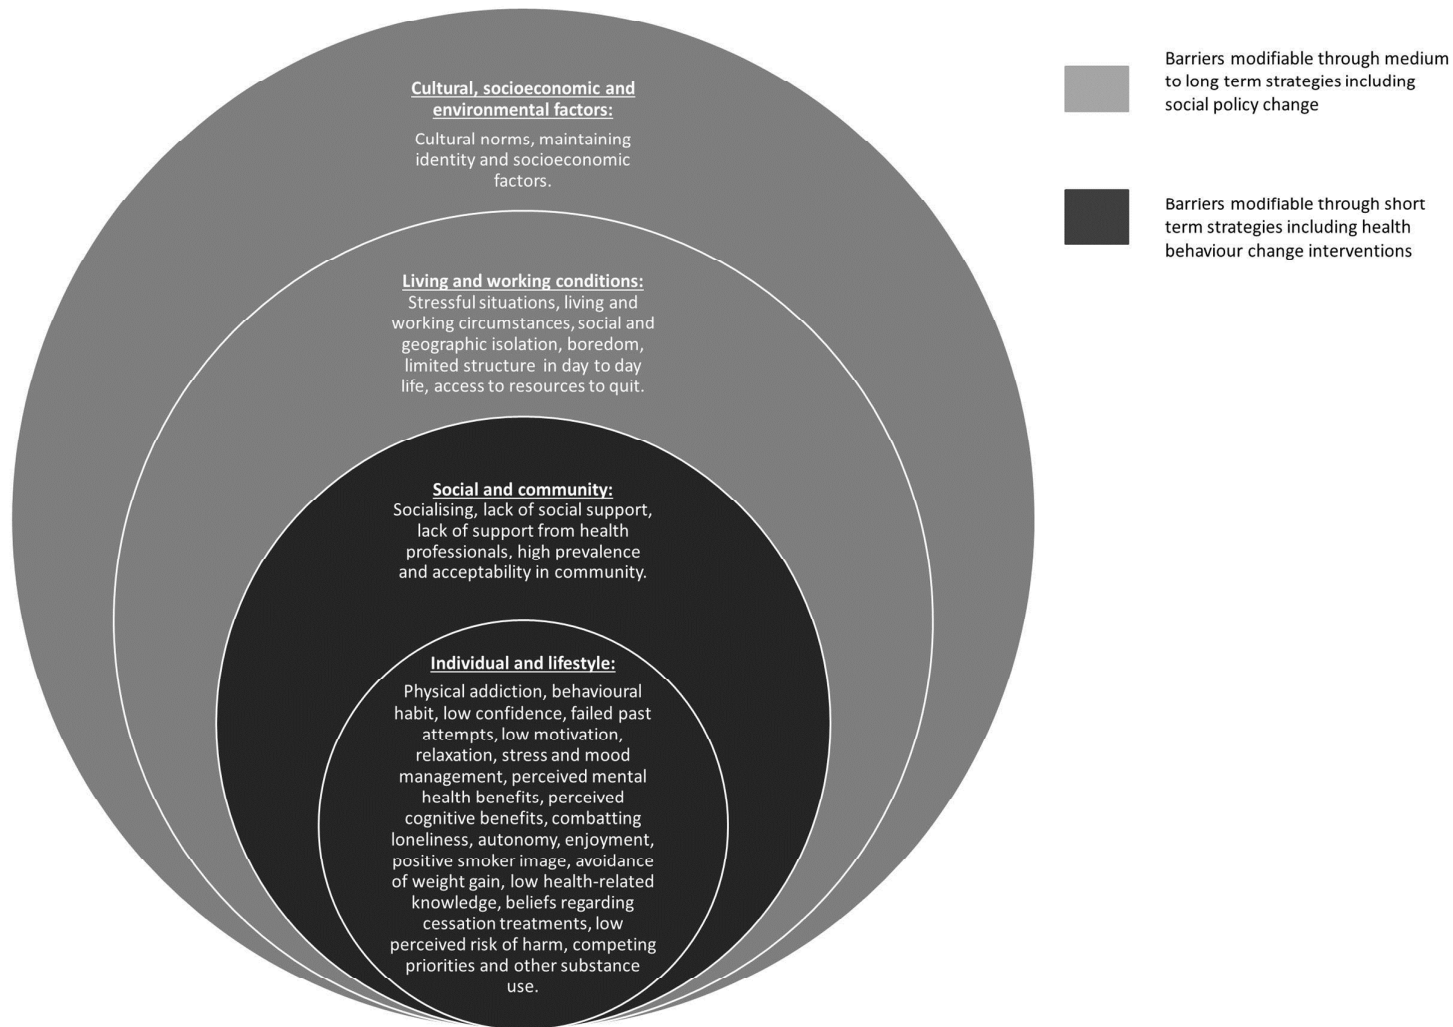

Figure 2. Model of the perceived barriers to smoking cessation identified within six disadvantaged groups.

**Supplementary file 1: References of full text articles that were retrieved, reviewed and excluded for not meeting inclusion criteria. Articles could meet multiple criteria for exclusion.**

**Low income studies excluded (n = )**

*Intervention studies*

1. Maher JE, Rohde K, Dent CW, Stark MJ, Pizacani B, Boysun MJ, et al. Is a statewide tobacco quitline an appropriate service for specific populations? *Tobacco Control*. 2007;16 Suppl 1:i65-70.
2. Miller CL, Sedivy V. Using a quitline plus low-cost nicotine replacement therapy to help disadvantaged smokers to quit. *Tobacco Control*. 2009;18(2):144-9.
3. Moffatt J, Stanton WR. Smoking and parenting among males in low socio-economic occupations. *International Journal of Health Promotion and Education*. 2005;43(3):81-6.
4. O'Brien J, Salmon A, Geikie A, Jardine A, Oakes W. Integrating smoking care in community welfare agencies to reach disadvantaged people: Findings from the Smoking Matters Project. *Health Promotion Journal of Australia*. 2010;21(3):176-82.
5. O'Loughlin J, Paradis G, Renaud L, Meshefedjian G, Barnett T. The "Yes, I Quit" smoking cessation course: does it help women in a low income community quit? *Journal of community health*. 1997;22(6):451-68.
6. Sias JJ, Urquidi UJ, Bristow ZM, Rodriguez JC, Ortiz M. Evaluation of smoking cessation behaviors and interventions among Latino smokers at low-income clinics in a US-Mexico border county. *Addictive behaviors*. 2008;33(2):373-80. Epub 2007/11/17.
7. Zanis DA, Hollm RE, Derr D, Ibrahim JK, Collins BN, Coviello D, et al. Comparing intervention strategies among rural, low SES, young adult tobacco users. *American journal of health behavior*. 2011;35(2):240-7.

*No discussion of barriers*

1. Ackerson LK, Viswanath K. Communication inequalities, social determinants, and intermittent smoking in the 2003 Health Information National Trends Survey. *Preventing chronic disease*. 2009;6(2):A40.
2. Amos A, Wiltshire S, Bostock Y, Haw S, McNeill A. 'You can't go without a fag...you need it for your hash'--a qualitative exploration of smoking, cannabis and young people. *Addiction (Abingdon, England)*. 2004;99(1):77-81. Epub 2003/12/18.
3. Arnold CL, Davis TC, Berkel HJ, Jackson RH, Nandy I, London S. Smoking status, reading level, and knowledge of tobacco effects among low-income pregnant women. *Preventive medicine*. 2001;32(4):313-20. Epub 2001/04/17.
4. Bonevski B, Bryant J, Paul C. Encouraging smoking cessation among disadvantaged groups: a qualitative study of the financial aspects of cessation. *Drug and alcohol review*. 2011;30(4):411-8. Epub 2011/03/02.
5. Donaghy E, Bauld L, Eadie D, McKell J, Pringle B, Amos A. A qualitative study of how young Scottish smokers living in disadvantaged communities get their cigarettes. *Nicotine & tobacco research : official journal of the Society for Research on Nicotine and Tobacco*. 2013;15(12):2053-9. Epub 2013/08/06.
6. Eadie D, MacAskill S, McKell J, Baybutt M. Barriers and facilitators to a criminal justice tobacco control coordinator: an innovative approach to supporting smoking cessation among offenders. *Addiction (Abingdon, England)*. 2012;107 Suppl 2:26-38. Epub 2012/11/21.
7. Gillies V, Willig C. 'You get the nicotine and that in your blood'—constructions of addiction and control in women's accounts of cigarette smoking. *Journal of Community & Applied Social Psychology*. 1997;7(4):285-301.

8. Macleod J, Smith GD, Metcalfe C, Hart C. Is subjective social status a more important determinant of health than objective social status? Evidence from a prospective observational study of Scottish men. *Social Science & Medicine*. 2005;61(9):1916-29.
9. Manfredi C, Cho YI, Crittenden KS, Dolecek TA. A path model of smoking cessation in women smokers of low socio-economic status. *Health education research*. 2007;22(5):747-56.
10. Manfredi C, Lacey L, Warnecke R, Balch G. Method effects in survey and focus group findings: understanding smoking cessation in low-SES African American women. *Health education & behavior : the official publication of the Society for Public Health Education*. 1997;24(6):786-800. Epub 1997/12/31.
11. Moore RS, McLellan DL, Tauras JA, Fagan P. Securing the health of disadvantaged women: a critical investigation of tobacco-control policy effects on women worldwide. *American Journal of Preventive Medicine*. 2009;37(2 Suppl):S117-20.
12. Pickett KE, Luo Y, Lauderdale DS. Widening social inequalities in risk for sudden infant death syndrome. *American journal of public health*. 2005;95(11):1976-81.
13. Pollak KI, Arredondo EM, Yarnall KSH, Lipkus I, Myers E, McNeilly M, et al. Influence of stereotyping in smoking cessation counselling by primary care residents. *Ethnicity and Disease*. 2002;12(4):578-84.
14. Wilson IS, Ritchie D, Amos A, Shaw A, O'Donnell R, Mills LM, et al. 'I'm not doing this for me': mothers' accounts of creating smoke-free homes. *Health Educ Res*. 2013;28(1):165-78. Epub 2012/07/31.
15. Wiltshire S, Bancroft A, Amos A, Parry O. "They're doing people a service"-qualitative study of smoking, smuggling, and social deprivation. *BMJ (Clinical research ed)*. 2001;323(7306):203-7. Epub 2001/07/28.

*No discussion of barriers to smoking cessation (e.g might be barreirs to accessing health care in general)*

1. Ackerson LK, Viswanath K. Communication inequalities, social determinants, and intermittent smoking in the 2003 Health Information National Trends Survey. *Preventing chronic disease*. 2009;6(2):A40.
2. Amos A, Wiltshire S, Bostock Y, Haw S, McNeill A. 'You can't go without a fag...you need it for your hash'--a qualitative exploration of smoking, cannabis and young people. *Addiction (Abingdon, England)*. 2004;99(1):77-81. Epub 2003/12/18.
3. Arnold CL, Davis TC, Berkel HJ, Jackson RH, Nandy I, London S. Smoking status, reading level, and knowledge of tobacco effects among low-income pregnant women. *Preventive medicine*. 2001;32(4):313-20. Epub 2001/04/17.
4. Bonevski B, Bryant J, Paul C. Encouraging smoking cessation among disadvantaged groups: a qualitative study of the financial aspects of cessation. *Drug and alcohol review*. 2011;30(4):411-8. Epub 2011/03/02.
5. Donaghy E, Bauld L, Eadie D, McKell J, Pringle B, Amos A. A qualitative study of how young Scottish smokers living in disadvantaged communities get their cigarettes. *Nicotine & tobacco research : official journal of the Society for Research on Nicotine and Tobacco*. 2013;15(12):2053-9. Epub 2013/08/06.
6. Eadie D, MacAskill S, McKell J, Baybutt M. Barriers and facilitators to a criminal justice tobacco control coordinator: an innovative approach to supporting smoking cessation among offenders. *Addiction (Abingdon, England)*. 2012;107 Suppl 2:26-38. Epub 2012/11/21.
7. Gillies V, Willig C. 'You get the nicotine and that in your blood'—constructions of addiction and control in women's accounts of cigarette smoking. *Journal of Community & Applied Social Psychology*. 1997;7(4):285-301.
8. Macleod J, Smith GD, Metcalfe C, Hart C. Is subjective social status a more important determinant of health than objective social status? Evidence from a prospective observational study of Scottish men. *Social Science & Medicine*. 2005;61(9):1916-29.

- 1  
2  
3  
4  
5  
6  
7  
8  
9  
10  
11  
12  
13  
14  
15  
16  
17  
18  
19  
20  
21  
22  
23  
24  
25  
26  
27  
28  
29  
30  
31  
32  
33  
34  
35  
36  
37  
38  
39  
40
9. Manfredi C, Cho YI, Crittenden KS, Dolecek TA. A path model of smoking cessation in women smokers of low socio-economic status. *Health education research*. 2007;22(5):747-56.
  10. Manfredi C, Lacey L, Warnecke R, Balch G. Method effects in survey and focus group findings: understanding smoking cessation in low-SES African American women. *Health education & behavior : the official publication of the Society for Public Health Education*. 1997;24(6):786-800. Epub 1997/12/31.
  11. Moore RS, McLellan DL, Tauras JA, Fagan P. Securing the health of disadvantaged women: a critical investigation of tobacco-control policy effects on women worldwide. *American Journal of Preventive Medicine*. 2009;37(2 Suppl):S117-20.
  12. Pickett KE, Luo Y, Lauderdale DS. Widening social inequalities in risk for sudden infant death syndrome. *American journal of public health*. 2005;95(11):1976-81.
  13. Pollak KI, Arredondo EM, Yarnall KSH, Lipkus I, Myers E, McNeilly M, et al. Influence of stereotyping in smoking cessation counselling by primary care residents. *Ethnicity and Disease*. 2002;12(4):578-84.
  14. Wilson IS, Ritchie D, Amos A, Shaw A, O'Donnell R, Mills LM, et al. 'I'm not doing this for me': mothers' accounts of creating smoke-free homes. *Health Educ Res*. 2013;28(1):165-78. Epub 2012/07/31.
  15. Wiltshire S, Bancroft A, Amos A, Parry O. "They're doing people a service"-qualitative study of smoking, smuggling, and social deprivation. *BMJ (Clinical research ed)*. 2001;323(7306):203-7. Epub 2001/07/28.
  16. Copeland AL, Businelle MS, Stewart DW, Patterson SM, Rash CJ, Carney CE. Identifying Barriers to Entering Smoking Cessation Treatment Among Socioeconomically Disadvantaged Smokers. *Journal of Smoking Cessation*. 2010;5(02):164-71.
  17. Jones LL, Atkinson O, Longman J, Coleman T, McNeill A, Lewis SA. The motivators and barriers to a smoke-free home among disadvantaged caregivers: identifying the positive levers for change. *Nicotine & tobacco research : official journal of the Society for Research on Nicotine and Tobacco*. 2011;13(6):479-86. Epub 2011/03/31.
  18. Katainen A. Smoking and workers' autonomy: a qualitative study on smoking practices in manual work. *Health (London, England : 1997)*. 2012;16(2):134-50. Epub 2011/04/14.
  19. Sheffer CE, Brackman SL, Cottoms N, Olsen M. Understanding the barriers to use of free, proactive telephone counseling for tobacco dependence. *Qualitative health research*. 2011;21(8):1075-85. Epub 2011/04/06.

41 *Not carried out in high income country/not published in English*

- 42  
43  
44  
45  
46  
47  
48  
49  
50
1. Ossip-Klein DJ, Fisher S, Diaz S, Quiñones Z, Sierra E, Dozier A, et al. Tobacco use in six economically disadvantaged communities in the Dominican Republic. *Nicotine & Tobacco Research*. 2008;10(5):851-60.
  2. Zane PK, Kunze MJ, Kunze M. Smoking behaviour: motivational determinants and modification techniques. A review. *Rehabilitation; Sozialmedizin Physikalische Medizin Präventivmedizin*. 1974;27(1-2):1-12.

51 *Not reporting the perceived self-reported barriers to smoking cessation (e.g. might report results of*  
52 *logistic regressions showing nicotine dependence associated with cessation success)*

- 53  
54  
55  
56  
57  
58  
59  
60
1. Bhandari S, Levitch AH, Ellis KK, Ball K, Everett K, Geden E, et al. Comparative analyses of stressors experienced by rural low-income pregnant women experiencing intimate partner violence and those who are not. *Journal of obstetric, gynecologic, and neonatal nursing : JOGNN / NAACOG*. 2008;37(4):492-501. Epub 2008/08/30.
  2. Caleyachetty A, Lewis S, McNeill A, Leonardi-Bee J. Struggling to make ends meet: exploring pathways to understand why smokers in financial difficulties are less likely to quit successfully. *European journal of public health*. 2012;22 Suppl 1:41-8.

3. Colgan Y, Turnbull DA, Mikocka-Walus AA, Delfabbro P. Determinants of resilience to cigarette smoking among young Australians at risk: An exploratory study. *Tobacco Induced Diseases*. 2010;8(1).
4. Collins BN, Nair U, Hovell MF, Audrain-McGovern J. Smoking-related weight concerns among underserved, black maternal smokers. *American journal of health behavior*. 2009;33(6):699-709. Epub 2009/03/27.
5. Cummings KM, Hyland A, Giovino GA, Hastrup JL, Bauer JE, Bansal MA. Are smokers adequately informed about the health risks of smoking and medicinal nicotine? *Nicotine & Tobacco Research*. 2004;6 Suppl 3:S333-40.
6. de Beyer J, Lovelace C, Yürekli A. Poverty and tobacco. *Tobacco Control*. 2001;10(3):210-1.
7. De Silva V, Samarasinghe D, Hanwella R. Association between concurrent alcohol and tobacco use and poverty. *Drug & Alcohol Review*. 2011;30(1):69-73.
8. Graham H. Women and smoking: Understanding socioeconomic influences. *Drug and Alcohol Dependence*. 2009;104(Suppl1):S11-S6.
9. Graham H, Der G. Influences on women's smoking status: the contribution of socioeconomic status in adolescence and adulthood. *European journal of public health*. 1999;9(2):137-41.
10. Graham H, Der G. Patterns and predictors of smoking cessation among British women. *Health promotion international*. 1999;14(3):231-9.
11. Graham H, Der G. Patterns and predictors of tobacco consumption among women. *Health education research*. 1999;14(5):611-8.
12. Graham H, Francis B, Inskip HM, Harman J, Team SWSS. Socioeconomic lifecourse influences on women's smoking status in early adulthood. *Journal of Epidemiology & Community Health*. 2006;60(3):228-33.
13. Graham H, Hawkins SS, Law C. Lifecourse influences on women's smoking before, during and after pregnancy. *Social Science & Medicine*. 2010;70(4):582-7.
14. Graham H, Inskip HM, Francis B, Harman J. Pathways of disadvantage and smoking careers: Evidence and policy implications. *Journal of epidemiology and community health*. 2006;60(Suppl 2):7-12.
15. Graham H, Owen L. Are there socioeconomic differentials in under-reporting of smoking in pregnancy? *Tobacco Control*. 2003;12(4):434.
16. Harwood GA, Salsberry P, Ferketich AK, Wewers ME. Cigarette smoking, socioeconomic status, and psychosocial factors: examining a conceptual framework. *Public health nursing (Boston, Mass)*. 2007;24(4):361-71. Epub 2007/06/08.
17. Healton C, Nelson K. Going public. Reversal of misfortune: viewing tobacco as a social justice issue. *American journal of public health*. 2004;94(2):186-91.
18. Kim DH, Daskalakis C, Plumb JD, Adams S, Brawer R, Orr N, et al. Modifiable cardiovascular risk factors among individuals in low socioeconomic communities and homeless shelters. *Family & community health*. 2008;31(4):269-80.
19. Kleinjan M, van den Eijnden RJM, Engels RCME. Adolescents' rationalizations to continue smoking: the role of disengagement beliefs and nicotine dependence in smoking cessation. *Addictive behaviors*. 2009;34(5):440-5.
20. Lacey LP, Manfredi C, Balch G, Warnecke RB, Allen K, Edwards C. Social support in smoking cessation among black women in Chicago public housing. *Public Health Reports*. 1993;108(3):387-94.
21. Lennox AS. Determinants of outcome in smoking cessation. *British Journal of General Practice*. 1992;42(359):247-52.
22. Lindström M. Social capital, social class and tobacco smoking. *Expert Review of Pharmacoeconomics & Outcomes Research*. 2008;8(1):81-9.
23. Manfredi C, Lacey L, Warnecke R, Buis M. Smoking-related behavior, beliefs, and social environment of young black women in subsidized public housing in Chicago. *American journal of public health*. 1992;82(2):267-72. Epub 1992/02/01.

24. Morrow M, Barraclough S. Gender equity and tobacco control: bringing masculinity into focus. *Global health promotion*. 2010;17(1 Suppl):21-8.
25. O'Loughlin J, Paradis G, Renaud L, Sanchez Gomez L. One-year predictors of smoking initiation and of continued smoking among elementary schoolchildren in multiethnic, low-income, inner-city neighbourhoods. *Tobacco Control*. 1998;7(3):268-75.
26. Ostroff JS, Shuk E, Krebs P, Lu W-H, Burkhalter J, Cortez-Weir J, et al. Qualitative evaluation of a new tobacco cessation training curriculum for patient navigators. *Journal of Cancer Education*. 2011;26(3):427-35.
27. Pickett K, Wilkinson R, Wakschlag L. The psychosocial context of pregnancy smoking and quitting in the Millennium Cohort Study. *Journal of epidemiology and community health*. 2009;63(6):474-80.
28. Pickett KE, Wakschlag LS, Rathouz PJ, Leventhal BL, Abrams B. The working-class context of pregnancy smoking. *Health & place*. 2002;8(3):167-75.
29. Reitzel LR, Vidrine JI, Li Y, Mullen PD, Velasquez MM, Cinciripini PM, et al. The influence of subjective social status on vulnerability to postpartum smoking among young pregnant women. *American journal of public health*. 2007;97(8):1476-82.
30. Roberts-Clarke I, Morokoff P, Bane C, Ruggiero L. Characteristics of Smoking in Low-Income Pregnant Latina and White Women. *Journal of Community Health Nursing*. 2002;19(2):77-81.
31. Rooke C, Amos A, Hight G, Hargreaves K. Smoking spaces and practices in pubs, bars and clubs: young adults and the English smokefree legislation. *Health Place*. 2013;19:108-15. Epub 2012/12/12.
32. Ryckman KA, Bercaw DM, Ellis MR, Wolf DG. What predicts a successful smoking cessation attempt? *The Journal of family practice*. 2006;55(9):No Pagination Specified.
33. Sheahan SL, Free TA, Rayens MK. Smoking behavior and desire to quit among low-income female caregivers. *Applied nursing research : ANR*. 2003;16(3):156-63. Epub 2003/08/22.
34. Siahpush M, Borland R, Scollo M. Prevalence and socio-economic correlates of smoking among lone mothers in Australia. *Australian & New Zealand Journal of Public Health*. 2002;26(2):132-5.
35. Siahpush M, Borland R, Scollo M. Smoking and financial stress. *Tobacco Control*. 2003;12(1):60-6.
36. Siahpush M, Borland R, Yong HH. Sociodemographic and psychosocial correlates of smoking-induced deprivation and its effect on quitting: findings from the International Tobacco Control Policy Evaluation Survey. *Tobacco Control*. 2007;16(2):e2-e.
37. Siegel D, Faigeles B. Smoking and socioeconomic status in a population-based inner city sample of African-Americans, Latinos and whites. *Journal of Cardiovascular Risk*. 1996;3(3):295-300.
38. Snell C, Bailey L. Operation storefront: observations of tobacco retailer advertising and compliance with tobacco laws. *Youth Violence & Juvenile Justice*. 2005;3(1):78-90.
39. Solberg LI, Parker ED, Foldes SS, Walker PF. Disparities in tobacco cessation medication orders and fills among special populations. *Nicotine & Tobacco Research*. 2010;12(2):144-51.
40. Turrell G, Hewitt BA, Miller SA. The influence of neighbourhood disadvantage on smoking cessation and its contribution to inequalities in smoking status. *Drug and alcohol review*. 2012;31(5):645-52. Epub 2012/04/18.

#### *Population level study*

1. Adams RJ, Howard N, Tucker G, Appleton S, Taylor AW, Chittleborough C, et al. Effects of area deprivation on health risks and outcomes: A multilevel, cross-sectional, Australian population study. *International journal of public health*. 2009;54(3):183-92.
2. Graham H, Hunt S. Women's smoking and measures of women's socioeconomic status in the United Kingdom. *Health promotion international*. 1994;9(2):81-8.



3. Hiscock R, Bauld L, Amos A, Platt S. Smoking and socioeconomic status in England: the rise of the never smoker and the disadvantaged smoker. *Journal of public health (Oxford, England)*. 2012;34(3):390-6. Epub 2012/03/01.
4. Leung J, Gartner C, Dobson A, Lucke J, Hall W. Psychological distress is associated with tobacco smoking and quitting behaviour in the Australian population: Evidence from national cross-sectional surveys. *Australian and New Zealand Journal of Psychiatry*. 2011;45(2):170-8.
5. Smith GD, Hart C. "Socioeconomic factors, health behaviors, and mortality: Results from a nationally representative prospective study of US adults": Comment. *JAMA: Journal of the American Medical Association*. 1998;280(20):1744-5.

*Reviews (reviews conducted on smoking within the defined disadvantaged group but not reporting on perceived barriers to smoking cessation)*

1. Doolan DM, Froelicher ES. Efficacy of smoking cessation intervention among special populations: review of the literature from 2000 to 2005. *Nursing research*. 2006;55(4S):S29-37.
2. Frazier LM, Molgaard CA, Fredrickson DD, Early JL, Schukman JS, Dismuke SE. Barriers to smoking cessation initiatives for Medicaid clients in managed care. *Substance use & misuse*. 2001;36(13):1875-99. Epub 2002/01/25.
3. Geckova A, van Dijk JP, van Ittersum-Gritter T, Groothoff JW, Post D. Determinants of adolescents' smoking behaviour: a literature review. *Central European Journal of Public Health*. 2002;10(3):79-87.
4. Greaves L, Jategaonkar N. Tobacco policies and vulnerable girls and women: toward a framework for gender sensitive policy development. *Journal of epidemiology and community health*. 2006;60 Suppl 2:57-65. Epub 2007/08/22.
5. Kim SS, Ziedonis D, Chen K. Tobacco use and dependence in Asian American and Pacific Islander adolescents: a review of the literature. *Journal of Ethnicity in Substance Abuse*. 2007;6(3-4):113-42.
6. Lodge N. The identified needs of ethnic minority groups with cancer within the community: a review of the literature. *European Journal of Cancer Care*. 2001;10(4):234-44.
7. Power J, Grealy C, Rintoul D. Tobacco interventions for Indigenous Australians: a review of current evidence. *Health Promotion Journal of Australia*. 2009;20(3):186-94.
8. Schneider S, Schutz J. Who smokes during pregnancy? A systematic literature review of population-based surveys conducted in developed countries between 1997 and 2006. *The European Journal of Contraception and Reproductive Health Care*. 2008;13(2):138-47.
9. Seo D-C, Huang Y. Systematic review of social network analysis in adolescent cigarette smoking behavior. *Journal of School Health*. 2012;82(1):21-7.
10. Vangeli E, Stapleton J, Smit ES, Borland R, West R. Predictors of attempts to stop smoking and their success in adult general population samples: a systematic review. *Addiction (Abingdon, England)*. 2011;106(12):2110-21.

*Studies not meeting the subgroup definition*

1. Abdullah ASM, Ho LM, Kwan YH, Cheung WL, McGhee SM, Chan WH. Promoting smoking cessation among the elderly: What are the predictors of intention to quit and successful quitting? *Journal of aging and health*. 2006;18(4):552-64.
2. Adams E, Melvin CL, Raskind-Hood CL. Sociodemographic, insurance, and risk profiles of maternal smokers post the 1990s: How can we reach them? *Nicotine & Tobacco Research*. 2008;10(7):1121-9.
3. Aitken PP, Davies JK, Leather DS. Smoking prevalence and beliefs among adult Scots: implications for health education. *International journal of health education*. 1982;24(3):164-75. Epub 1982/01/01.

4. Blackburn C, Bonas S, Spencer N, Dolan A, Coe C, Moy R. Smoking behaviour change among fathers of new infants. *Social Science & Medicine*. 2005;61(3):517-26.
5. Denham SA, Meyer MG, Toborg MA. Tobacco cessation in adolescent females in Appalachian communities. *Family & community health*. 2004;27(2):170-81. Epub 2004/12/15.
6. Ko M, Schulken ED. Factors related to smoking cessation and relapse among pregnant smokers. *American journal of health behavior*. 1998;22(2):83-9.
7. Kruger TM, Howell BM, Haney A, Davis RE, Fields N, Schoenberg NE. Perceptions of smoking cessation programs in rural Appalachia. *American journal of health behavior*. 2012;36(3):373-84. Epub 2012/03/01.
8. Macnee CL, Talsma A. Development and testing of the barriers to cessation scale. *Nursing research*. 1995;44(4):214-9.
9. Northridge ME, Vallone D, Xiao H, Green M, Weikle Blackwood J, Kemper SE, et al. The importance of location for tobacco cessation: rural-urban disparities in quit success in underserved West Virginia counties. *Journal of Rural Health*. 2008;24(2):106-15.
10. Owers RC, Ballard KD. "What else is there to do?"--A qualitative study of the barriers to soldiers stopping smoking. *Journal of the Royal Army Medical Corps*. 2008;154(3):152-5. Epub 2009/02/11.
11. Payne S. 'Smoke like a man, die like a man'? A review of the relationship between gender, sex and lung cancer. *Social Science and Medicine*. 2001;53(8):1067-80.
12. Pletsch PK, Morgan S, Pieper AF. Context and beliefs about smoking and smoking cessation. *MCN The American journal of maternal child nursing*. 2003;28(5):320-5. Epub 2003/09/23.
13. Ripley-Moffitt CE, Goldstein AO, Fang WL, Butzen AY, Walker S, Lohr JA. Safe babies: a qualitative analysis of the determinants of postpartum smoke-free and relapse states. *Nicotine & tobacco research : official journal of the Society for Research on Nicotine and Tobacco*. 2008;10(8):1355-64. Epub 2008/08/08.
14. Shervington DO. Attitudes and practices of African-American women regarding cigarette smoking: implications for interventions. *Journal of the National Medical Association*. 1994;86(5):337-43. Epub 1994/05/01.
15. Wewers ME, Ahijevych KL, Chen MS, Dresbach S, Kihm KE, Kuun PA. Tobacco use characteristics among rural Ohio Appalachians. *Journal of community health*. 2000;25(5):377-88. Epub 2000/09/12.

### **Indigenous studies**

#### *Intervention studies*

1. Choi WS, Faseru B, Beebe LA, Greiner AK, Yeh HW, Shireman TI, et al. Culturally-tailored smoking cessation for American Indians: study protocol for a randomized controlled trial. *Trials*. 2011;12:126. Epub 2011/05/20.
2. Daley CM, James AS, Barnoskie RS, Segraves M, Schupbach R, Choi WS. "Tobacco has a purpose, not just a past": Feasibility of developing a culturally appropriate smoking cessation program for a pan-tribal native population. *Medical anthropology quarterly*. 2006;20(4):421-40. Epub 2007/01/18.
3. Glover M, Bosman A, Wagemakers A, Kira A, Paton C, Cowie N. An innovative team-based stop smoking competition among Maori and Pacific Island smokers: rationale and method for the study and its evaluation. *BMC public health*. 2013;13:1228. Epub 2013/12/25.
4. Harvey D, Tsey K, Cadet-James Y, Minniecon D, Ivers R, McCalman J, et al. An evaluation of tobacco brief intervention training in three indigenous health care settings in north Queensland. *Australian and New Zealand journal of public health*. 2002;26(5):426-31. Epub 2002/11/05.
5. Ivers RG, Farrington M, Burns CB, Bailie RS, D'Abbs PH, Richmond RL, et al. A study of the use of free nicotine patches by Indigenous people. *Australian and New Zealand journal of public health*. 2003;27(5):486-90. Epub 2003/12/04.

6. Johnston V, Walker N, Thomas DP, Glover M, Chang AB, Bullen C, et al. The study protocol for a randomized controlled trial of a family-centred tobacco control program about environmental tobacco smoke (ETS) to reduce respiratory illness in Indigenous infants. *BMC public health*. 2010;10:114. Epub 2010/03/09.
7. Makosky Daley C, Cowan P, Nollen NL, Greiner KA, Choi WS. Assessing the scientific accuracy, readability, and cultural appropriateness of a culturally targeted smoking cessation program for American Indians. *Health promotion practice*. 2009;10(3):386-93. Epub 2008/03/08.
8. Patten CA, Windsor RA, Renner CC, Enoch C, Hochreiter A, Nevak C, et al. Feasibility of a tobacco cessation intervention for pregnant Alaska Native women. *Nicotine & tobacco research : official journal of the Society for Research on Nicotine and Tobacco*. 2010;12(2):79-87. Epub 2009/12/19.
9. Robertson JA, Conigrave KM, Ivers R, Usher K, Clough AR. Translation of tobacco policy into practice in disadvantaged and marginalized subpopulations: a study of challenges and opportunities in remote Australian Indigenous communities. *Health research policy and systems / BioMed Central*. 2012;10:23. Epub 2012/07/31.

*No discussion of barriers*

1. Dennis MK, Momper SL. "It's bad around here now": tobacco, alcohol and other drug use among American Indians living on a rural reservation. *Journal of ethnicity in substance abuse*. 2012;11(2):130-48. Epub 2012/06/12.
2. DiGiacomo M, Davidson PM, Davison J, Moore L, Abbott P. Stressful life events, resources, and access: key considerations in quitting smoking at an Aboriginal Medical Service. *Australian and New Zealand journal of public health*. 2007;31(2):174-6. Epub 2007/04/28.
3. Forster JL, Brokenleg I, Rhodes KL, Lamont GR, Poupart J. Cigarette smoking among American Indian youth in Minneapolis-St. Paul. *American journal of preventive medicine*. 2008;35(6 Suppl):S449-56. Epub 2008/11/26.
4. Forster JL, Rhodes KL, Poupart J, Baker LO, Davey C, American Indian Community Tobacco Project Steering C. Patterns of tobacco use in a sample of American Indians in Minneapolis-St. Paul. *Nicotine & tobacco research : official journal of the Society for Research on Nicotine and Tobacco*. 2007;9 Suppl 1:S29-37. Epub 2007/03/17.
5. Horn K, Noerachmanto N, Dino G, Manzo K, Brayboy M. Who wants to quit? Characteristics of American Indian youth who seek smoking cessation intervention. *Journal of community health*. 2009;34(2):153-63.
6. Thomas DP, Johnston V, Fitz JW, McDonnell J. Monitoring local trends in Indigenous tobacco consumption. *Australian and New Zealand journal of public health*. 2009;33(1):64-6. Epub 2009/02/25.

*No discussion of barriers to smoking cessation (e.g might be barreirs to accessing health care in general)*

1. Beals J, Novins DK, Spicer P, Whitesell NR, Mitchell CM, Manson SM, et al. Help seeking for substance use problems in two American Indian reservation populations. *Psychiatric services (Washington, DC)*. 2006;57(4):512-20. Epub 2006/04/11.
2. Berg CJ, Daley CM, Nazir N, Cully A, Pacheco CM, Buchanan T, et al. Smoke-Free Policies in the Workplace and in the Home among American Indians. *Journal of health disparities research and practice*. 2012;5(2):81-91. Epub 2012/01/01.
3. Botorff JL, Carey J, Mowatt R, Varcoe C, Johnson JL, Hutchinson P, et al. Bingo halls and smoking: perspectives of First Nations women. *Health & place*. 2009;15(4):1014-21. Epub 2009/06/02.

- 1
- 2
- 3
4. Bottorff JL, Johnson JL, Carey J, Hutchinson P, Sullivan D, Mowatt R, et al. A family affair: Aboriginal women's efforts to limit second-hand smoke exposure at home. *Canadian journal of public health = Revue canadienne de sante publique*. 2010;101(1):32-5. Epub 2010/04/07.
5. Filippi MK, McCloskey C, Williams C, Bull JW, Choi WS, Greiner KA, et al. Perceptions, barriers, and suggestions for creation of a tobacco and health website among American Indian/Alaska Native college students. *Journal of community health*. 2013;38(3):486-91. Epub 2012/11/15.
6. Glover M, Fraser T, Nosa V. Views of Low Socio-Economic Smokers: What Will Help Them to Quit? *Journal of Smoking Cessation*. 2012;7(01):41-6.
7. Hemsing N, Greaves L, Poole N, Bottorff J. Reshuffling and relocating: the gendered and income-related differential effects of restricting smoking locations. *Journal of environmental and public health*. 2012;2012:907832. Epub 2012/05/24.
8. Johnston V, Westphal DW, Earnshaw C, Thomas DP. Starting to smoke: a qualitative study of the experiences of Australian indigenous youth. *BMC public health*. 2012;12:963. Epub 2012/11/13.
9. Klemp P, Robertson MC, Stansfield S, Klemp JA, Harding E. Factors associated with smoking and the reasons for stopping in Maori and Europeans: a comparative study. *The New Zealand medical journal*. 1998;111(1064):148-501. Epub 1998/06/05.
10. Leavy J, Wood L, Phillips F, Rosenberg M. Try and try again--qualitative insights into adolescent smoking experimentation and notions of addiction. *Health promotion journal of Australia : official journal of Australian Association of Health Promotion Professionals*. 2010;21(3):208-14. Epub 2010/12/02.
11. LeMaster PL, Connell CM, Mitchell CM, Manson SM. Tobacco use among American Indian adolescents: protective and risk factors. *The Journal of adolescent health : official publication of the Society for Adolescent Medicine*. 2002;30(6):426-32. Epub 2002/06/01.
12. Mitschke DB, Matsunaga DS, Loebel K, Tatafu E, Jr., Robinett H. Multi-ethnic adolescents' attitudes toward smoking: a focus group analysis. *American Journal of Health Promotion*. 2008;22(6):393-9.
13. Nadeau M, Blake N, Poupart J, Rhodes K, Forster JL. Circles of Tobacco Wisdom: learning about traditional and commercial tobacco with Native elders. *American journal of preventive medicine*. 2012;43(5 Suppl 3):S222-8. Epub 2012/10/25.
14. Nez Henderson P, Kanekar S, Wen Y, Buchwald D, Goldberg J, Choi W, et al. Patterns of cigarette smoking initiation in two culturally distinct American Indian tribes. *American journal of public health*. 2009;99(11):2020-5. Epub 2009/10/13.
15. Struthers R, Hodge FS. Sacred tobacco use in Ojibwe communities. *Journal of holistic nursing : official journal of the American Holistic Nurses' Association*. 2004;22(3):209-25. Epub 2004/08/07.
16. Thomas DP, Briggs V, Anderson IP, Cunningham J. The social determinants of being an Indigenous non-smoker. *Australian and New Zealand journal of public health*. 2008;32(2):110-6. Epub 2008/04/17.
17. Thomas DP, Ferguson M, Johnston V, Brimblecombe J. Impact and perceptions of tobacco tax increase in remote Australian aboriginal communities. *Nicotine & tobacco research : official journal of the Society for Research on Nicotine and Tobacco*. 2013;15(6):1099-106. Epub 2012/11/21.
18. Unger JB, Rohrbach LA, Cruz TB, Baezconde-Garbanati L, Howard KA, Palmer PH, et al. Ethnic variation in peer influences on adolescent smoking. *Nicotine & tobacco research : official journal of the Society for Research on Nicotine and Tobacco*. 2001;3(2):167-76. Epub 2001/06/14.
19. Unger JB, Shakib S, Cruz TB, Hoffman BR, Pitney BH, Rohrbach LA. Smoking behavior among urban and rural Native American adolescents in California. *American journal of preventive medicine*. 2003;25(3):251-4. Epub 2003/09/26.
20. Unger JB, Soto C, Baezconde-Garbanati L. Perceptions of ceremonial and nonceremonial uses of tobacco by American-Indian adolescents in California. *The Journal of adolescent health : official publication of the Society for Adolescent Medicine*. 2006;38(4):443 e9-16. Epub 2006/03/22.

21. van Esdonk T, Glover M, Kira A, Wagemakers A. Reducing Smoking in Pregnancy Among Maori Women: "Aunties" Perceptions and Willingness to Help. *Maternal and child health journal*. 2013. Epub 2013/11/12.
22. Varcoe C, Bottorff JL, Carey J, Sullivan D, Williams W. Wisdom and influence of elders: possibilities for health promotion and decreasing tobacco exposure in First Nations communities. *Canadian journal of public health = Revue canadienne de sante publique*. 2010;101(2):154-8. Epub 2010/06/09.

*Not reporting the perceived self-reported barriers to smoking cessation (e.g. might report results of logistic regressions showing nicotine dependence associated with cessation success)*

1. Baezconde-Garbanati L, Beebe LA, Perez-Stable EJ. Building capacity to address tobacco-related disparities among American Indian and Hispanic/Latino communities: conceptual and systemic considerations. *Addiction (Abingdon, England)*. 2007;102 Suppl 2:112-22. Epub 2007/10/06.
2. Beebe LA, Vesely SK, Oman RF, Tolma E, Aspy CB, Rodine S. Protective assets for non-use of alcohol, tobacco and other drugs among urban American Indian youth in Oklahoma. *Maternal & Child Health Journal*. 2008;12:S82-90.
3. Butler S, Williams M, Paterson J, Tukuitonga C. Smoking among mothers of a Pacific Island birth cohort in New Zealand: associated factors. *The New Zealand medical journal*. 2004;117(1206):U1171.
4. Cosh S, Maksimovic L, Ettridge K, Copley D, Bowden JA. Aboriginal and Torres Strait Islander utilisation of the Quitline service for smoking cessation in South Australia. *Australian journal of primary health*. 2013;19(2):113-8. Epub 2012/09/07.
5. Daley CM, Faseru B, Nazir N, Solomon C, Greiner KA, Ahluwalia JS, et al. Influence of traditional tobacco use on smoking cessation among American Indians. *Addiction (Abingdon, England)*. 2011;106(5):1003-9. Epub 2011/02/11.
6. Daley CM, Greiner KA, Nazir N, Daley SM, Solomon CL, Braiucua SL, et al. All Nations Breath of Life: using community-based participatory research to address health disparities in cigarette smoking among American Indians. *Ethnicity & disease*. 2010;20(4):334-8. Epub 2011/02/11.
7. Faseru B, Daley CM, Gajewski B, Pacheco CM, Choi WS. A longitudinal study of tobacco use among American Indian and Alaska Native tribal college students. *BMC public health*. 2010;10:617. Epub 2010/10/20.
8. Gilligan C, Sanson-Fisher RW, D'Este C, Eades S, Wenitong M. Knowledge and attitudes regarding smoking during pregnancy among Aboriginal and Torres Strait Islander women. *The Medical journal of Australia*. 2009;190(10):557-61.
9. Gould GS, McEwen A, Munn J. Jumping the hurdles for smoking cessation in pregnant Aboriginal and Torres Strait Islander women in Australia. *Journal of Smoking Cessation*. 2011;6(1):33-6.
10. Henderson PN, Rhoades D, Henderson JA, Welty TK, Buchwald D. Smoking cessation and its determinants among older American Indians: the Strong Heart Study. *Ethnicity & disease*. 2004;14(2):274-9.
11. Hodge F, Nandy K. Factors associated with American Indian cigarette smoking in rural settings. *International journal of environmental research and public health*. 2011;8(4):944-54.
12. Hutchinson PJ, Richardson CG, Bottorff JL. Emergent cigarette smoking, correlations with depression and interest in cessation among Aboriginal adolescents in British Columbia. *Canadian Journal of Public Health*. 2008;99(5):418-22.
13. Johnston V, Thomas DP, McDonnell J, Andrews RM. Maternal smoking and smoking in the household during pregnancy and postpartum: findings from an Indigenous cohort in the Northern Territory. *The Medical journal of Australia*. 2011;194(10):556-9. Epub 2011/06/08.
14. Kendzor DE, Businelle MS, Reitzel LR, Rios DM, Scheuermann TS, Pulvers K, et al. Everyday discrimination is associated with nicotine dependence among African American, Latino, and White

smokers. *Nicotine & tobacco research : official journal of the Society for Research on Nicotine and Tobacco*. 2014;16(6):633-40. Epub 2013/12/05.

15. Nez Henderson P, Jacobsen C, Beals J, Team A-S. Correlates of cigarette smoking among selected Southwest and Northern plains tribal groups: the AI-SUPERPPF Study. *American journal of public health*. 2005;95(5):867-72. Epub 2005/04/28.

16. Okamoto SK, Helm S, Pel S, McClain LL, Hill AP, Hayashida JK. Developing empirically based, culturally grounded drug prevention interventions for indigenous youth populations. *The journal of behavioral health services & research*. 2014;41(1):8-19. Epub 2012/11/29.

17. Yu M, Stiffman AR, Freedenthal S. Factors affecting American Indian adolescent tobacco use. *Addictive Behaviors*. 2005;30(5):889-904.

#### *Population level study*

1. Reed MB, Burns DM. A population-based examination of racial and ethnic differences in receiving physicians' advice to quit smoking. *Nicotine and Tobacco Research*. 2008;10(9):1487-94.

#### *Reviews (reviews conducted on smoking within the defined disadvantaged group but not reporting on perceived barriers to smoking cessation)*

1. Conigrave KM, Lee KS. Smoking or alcohol dependence among Indigenous Australians: treatment may be needed, not just education. *Heart, lung & circulation*. 2012;21(10):626-31. Epub 2012/07/24.

2. Cox LS, Okuyemi K, Choi WS, Ahluwalia JS. A review of tobacco use treatments in U.S. ethnic minority populations. *American journal of health promotion : AJHP*. 2011;25(5 Suppl):S11-30. Epub 2011/04/29.

3. DiGiacomo M, Davidson PM, Abbott PA, Davison J, Moore L, Thompson SC. Smoking cessation in indigenous populations of Australia, New Zealand, Canada, and the United States: elements of effective interventions. *International journal of environmental research and public health*. 2011;8(2):388-410. Epub 2011/05/11.

4. Ivers RG. A review of tobacco interventions for Indigenous Australians. *Australian and New Zealand journal of public health*. 2003;27(3):294-9. Epub 2004/01/07.

5. Johnston V, Westphal DW, Glover M, Thomas DP, Segan C, Walker N. Reducing smoking among indigenous populations: new evidence from a review of trials. *Nicotine & tobacco research : official journal of the Society for Research on Nicotine and Tobacco*. 2013;15(8):1329-38. Epub 2013/03/23.

6. King TK, Borrelli B, Black C, Pinto BM, Marcus BH. Minority women and tobacco: implications for smoking cessation interventions. *Annals of behavioral medicine : a publication of the Society of Behavioral Medicine*. 1997;19(3):301-13. Epub 1997/07/01.

7. Kong G, Singh N, Krishnan-Sarin S. A review of culturally targeted/tailored tobacco prevention and cessation interventions for minority adolescents. *Nicotine & tobacco research : official journal of the Society for Research on Nicotine and Tobacco*. 2012;14(12):1394-406. Epub 2012/05/23.

8. Stolberg VB. A cross-cultural and historical survey of tobacco use among various ethnic groups. *Journal of ethnicity in substance abuse*. 2007;6(3-4):9-80. Epub 2007/01/01.

#### *Studies not meeting the subgroup definition*

1. Bond C, Brough M, Spurling G, Hayman N. 'It had to be my choice' Indigenous smoking cessation and negotiations of risk, resistance and resilience. *Health, Risk & Society*. 2012;14(6):565-81.

2. Haines RJ, Oliffe JL, Bottorff JL, Poland BD. 'The missing picture': tobacco use through the eyes of smokers. *Tobacco control*. 2010;19(3):206-12. Epub 2010/05/27.

3. Johnston V, Thomas DP. What works in Indigenous tobacco control? The perceptions of remote Indigenous community members and health staff. *Health promotion journal of Australia : official journal of Australian Association of Health Promotion Professionals*. 2010;21(1):45-50. Epub 2010/04/22.
4. Kraemer KM, McLeish AC, Jeffries ER, Avallone KM, Luberto CM. Distress tolerance and perceived barriers to smoking cessation. *Substance abuse : official publication of the Association for Medical Education and Research in Substance Abuse*. 2013;34(3):277-82. Epub 2013/07/13.
5. Lubetkin EI, Lu WH, Krebs P, Yeung H, Ostroff JS. Exploring primary care providers' interest in using patient navigators to assist in the delivery of tobacco cessation treatment to low income, ethnic/racial minority patients. *Journal of community health*. 2010;35(6):618-24. Epub 2010/03/26.
6. Renner CC, Enoch C, Patten CA, Ebbert JO, Hurt RD, Moyer TP, et al. Iqmik: a form of smokeless tobacco used among Alaska natives. *American journal of health behavior*. 2005;29(6):588-94. Epub 2005/12/13.
7. Wise M, Massi L, Rose M, Nancarrow H, Conigrave K, Bauman A, et al. Developing and implementing a state-wide Aboriginal health promotion program: the process and factors influencing successful delivery. *Health promotion journal of Australia : official journal of Australian Association of Health Promotion Professionals*. 2012;23(1):25-9. Epub 2012/06/27.

### **Mental illness studies**

#### *Intervention studies*

1. Ames SC, Croghan IT, Clark MM, Patten CA, Stevens SR, Schroeder DR, et al. Change in perceived stress, partner support, decisional balance, and self-efficacy following residential nicotine dependence treatment. *Journal of Addictive Diseases*. 2008;27(1):73-82.
2. Van Dongen CJ, Kriz P, Fox KA, Haque I. A quit smoking group pilot study. *Journal of Psychosocial Nursing & Mental Health Services*. 1999;37(12):31.
3. Weinberger AH, Hitsman B, Papandonatos GD, Sacco KA, Vessicchio JC, George TP. Predictors of abstinence and changes in psychiatric symptoms in a pooled sample of smokers with schizophrenia receiving combination pharmacotherapy and behavioral therapy for smoking cessation. *Journal of Clinical Psychopharmacology*. 2009;29(6):601-3.
4. Williams JM, Ziedonis DM, Vreeland B, Speelman-Edwards N, Zechner MR, Williams MT, et al. A wellness approach to addressing tobacco in mental health settings: learning about healthy living. *American Journal of Psychiatric Rehabilitation*. 2009;12(4):352-69.
5. Ziedonis DM, Amass L, Steinberg M, Woody G, Krejci J, Annon JJ, et al. Predictors of outcome for short-term medically supervised opioid withdrawal during a randomized, multicenter trial of buprenorphine-naloxone and clonidine in the NIDA clinical trials network drug and alcohol dependence. *Drug & Alcohol Dependence*. 2009;99(1-3):28-36.

#### *No discussion of barriers*

1. Acton GS, Kunz JD, Wilson M, Hall SM. The construct of internalization: conceptualization, measurement, and prediction of smoking treatment outcome. *Psychological Medicine*. 2005;35(3):395-408.
2. Carr S, Lhussier M, Forster N, Geddes L, Deane K, Pennington M, et al. An evidence synthesis of qualitative and quantitative research on component intervention techniques, effectiveness, cost-effectiveness, equity and acceptability of different versions of health-related lifestyle advisor role in improving health. *Health Technology Assessment*. 2011;15(9):1-284.
3. Cooper J, Mancuso SG, Borland R, Slade T, Galletly C, Castle D. Tobacco smoking among people living with a psychotic illness: the second Australian Survey of Psychosis. *The Australian and New Zealand journal of psychiatry*. 2012;46(9):851-63. Epub 2012/05/31.

4. Hapke U, Schumann A, Rumpf HJ, John U, Konerding U, Meyer C. Association of smoking and nicotine dependence with trauma and posttraumatic stress disorder in a general population sample. *The Journal of nervous and mental disease*. 2005;193(12):843-6. Epub 2005/12/02.
5. Kalman D, Morissette SB, George TP. Co-morbidity of smoking in patients with psychiatric and substance use disorders. *The American journal on addictions / American Academy of Psychiatrists in Alcoholism and Addictions*. 2005;14(2):106-23. Epub 2005/07/16.
6. Kelly PJ, Baker AL, Deane FP, Kay-Lambkin FJ, Bonevski B, Tregarthen J. Prevalence of smoking and other health risk factors in people attending residential substance abuse treatment. *Drug and alcohol review*. 2012;31(5):638-44. Epub 2012/05/31.
7. Moeller-Saxone K. Cigarette smoking and interest in quitting among consumers at a psychiatric disability rehabilitation and support service in Victoria. *Australian & New Zealand Journal of Public Health*. 2008;32(5):479-81.
8. Prochaska JJ. Failure to treat tobacco use in mental health and addiction treatment settings: a form of harm reduction? *Drug and alcohol dependence*. 2010;110(3):177-82. Epub 2010/04/10.
9. Prochaska JJ. Integrating tobacco treatment into mental health settings. *JAMA: Journal of the American Medical Association*. 2010;304(22):2534-5.
10. Reichler H, Baker A, Lewin T, Carr V. Smoking among in-patients with drug-related problems in an Australian psychiatric hospital. *Drug and alcohol review*. 2001;20(2):231-7.
11. Suplee PD. The importance of providing smoking relapse counseling during the postpartum hospitalization. *JOGNN: Journal of Obstetric, Gynecologic & Neonatal Nursing*. 2005;34(6):703-12.
12. Wye PM, Bowman JA, Wiggers JH, Baker A, Knight J, Carr VJ, et al. Smoking restrictions and treatment for smoking: policies and procedures in psychiatric inpatient units in Australia. *Psychiatric services (Washington, DC)*. 2009;60(1):100-7. Epub 2008/12/31.

*No discussion of barriers to smoking cessation (e.g might be barriers to accessing health care in general)*

1. Carmody TP, McFall M, Saxon AJ, Malte CA, Chow B, Joseph AM, et al. Smoking outcome expectancies in military veteran smokers with posttraumatic stress disorder. *Nicotine & tobacco research : official journal of the Society for Research on Nicotine and Tobacco*. 2012;14(8):919-26. Epub 2012/01/25.
2. Carton S, Jouvent R, Widlocher D. Nicotine dependence and motives for smoking in depression. *Journal of substance abuse*. 1994;6(1):67-76.
3. Kelly DL, Raley HG, Lo S, Wright K, Liu F, McMahon RP, et al. Perception of smoking risks and motivation to quit among nontreatment-seeking smokers with and without schizophrenia. *Schizophrenia bulletin*. 2012;38(3):543-51. Epub 2010/11/03.
4. Thornton LK, Baker AL, Lewin TJ, Kay-Lambkin FJ, Kavanagh D, Richmond R, et al. Reasons for substance use among people with mental disorders. *Addictive behaviors*. 2012;37(4):427-34. Epub 2011/12/27.
5. Torchalla I, Okoli CT, Malchy L, Johnson JL. Nicotine dependence and gender differences in smokers accessing community mental health services. *Journal of psychiatric and mental health nursing*. 2011;18(4):349-58. Epub 2011/03/23.

*Not reporting the perceived self-reported barriers to smoking cessation (e.g. might report results of logistic regressions showing nicotine dependence associated with cessation success)*

1. Alvarado GF, Breslau N. Smoking and young people's mental health. *Current Opinion in Psychiatry*. 2005;18(4):397-400.
2. Anderson AE, Bowman JA, Knight J, Wye PM, Terry M, Grimshaw S, et al. Smoking cessation care provision and support procedures in Australian community mental health centers. *Psychiatric services (Washington, DC)*. 2013;64(7):707-10. Epub 2013/07/04.



3. Apodaca TR, Abrantes AM, Strong DR, Ramsey SE, Brown RA. Readiness to change smoking behavior in adolescents with psychiatric disorders. *Addictive behaviors*. 2007;32(6):1119-30. Epub 2006/09/05.
4. Ashton M, Miller CL, Bowden JA, Bertossa S. People with mental illness can tackle tobacco. *Australian & New Zealand Journal of Psychiatry*. 2010;44(11):1021-8.
5. Blalock J, Robinson J, Wetter D, Cinciripini P. Relationship of DSM-IV-based depressive disorders to smoking cessation and smoking reduction in pregnant smokers. *American Journal on Addictions*. 2006;15(4):268-77.
6. Bonevski B, Bowman J, Richmond R, Bryant J, Wye P, Stockings E, et al. Turning of the tide: changing systems to address smoking for people with a mental illness. *Mental Health and Substance Use*. 2011;4(2):116-29.
7. Burgess ES, Brown RA, Kahler CW, Niaura R, Abrams DB, Goldstein MG, et al. Patterns of change in depressive symptoms during smoking cessation: who's at risk for relapse? *Journal of consulting and clinical psychology*. 2002;70(2):356-61. Epub 2002/04/16.
8. Compton MT, Daumit GL, Druss BG. Cigarette smoking and overweight/obesity among individuals with serious mental illnesses: a preventive perspective. *Harvard review of psychiatry*. 2006;14(4):212-22. Epub 2006/08/17.
9. Cook JW, McFall MM, Calhoun PS, Beckham JC. Posttraumatic stress disorder and smoking relapse: A theoretical model. *Journal of traumatic stress*. 2007;20(6):989-98. Epub 2007/12/25.
10. Cosci F, Corlando A, Fornai E, Pistelli F, Paoletti P, Carrozzi L. Nicotine dependence, psychological distress and personality traits as possible predictors of smoking cessation. Results of a double-blind study with nicotine patch. *Addictive behaviors*. 2009;34(1):28-35.
11. Culhane MA, Schoenfeld DA, Barr RS, Cather C, Deckersbach T, Freudenreich O, et al. Predictors of early abstinence in smokers with schizophrenia. *Journal of Clinical Psychiatry*. 2008;69(11):1743-50.
12. Hall SM, Prochaska JJ. Treatment of smokers with co-occurring disorders: emphasis on integration in mental health and addiction treatment settings. *Annual review of clinical psychology*. 2009;5:409-31. Epub 2009/03/31.
13. Japuntich SJ, Smith SS, Jorenby DE, Piper ME, Fiore MC, Baker TB. Depression predicts smoking early but not late in a quit attempt. *Nicotine & Tobacco Research*. 2007;9(6):677-86.
14. Killen JD, Fortmann SP, Kraemer HC, Varady AN, Davis L, Newman B. Interactive effects of depression symptoms, nicotine dependence, and weight change on late smoking relapse. *Journal of Consulting & Clinical Psychology*. 1996;64(5):1060-7.
15. Lan T-H, Chiu H-J, Wu B-J, Hung T-H, Hu T-M. Readiness to quit and smoking reduction outcomes. *American Journal of Psychiatry*. 2007;164(5):827-8; author reply 8.
16. Levine MD, Marcus MD, Kalarchian MA, Houck PR, Cheng Y. Weight concerns, mood, and postpartum smoking relapse. *American Journal of Preventive Medicine*. 2010;39(4):345-51.
17. Levine MD, Marcus MD, Kalarchian MA, Weissfeld L, Qin L. Weight concerns affect motivation to remain abstinent from smoking postpartum. *Annals of Behavioral Medicine*. 2006;32(2):147-53.
18. McGee R, Williams S, Stanton W. Is mental health in childhood a major predictor of smoking in adolescence? *Addiction (Abingdon, England)*. 1998;93(12):1869-74. Epub 1999/02/02.
19. Mezuk B, Rafferty JA, Kershaw KN, Hudson D, Abdou CM, Lee H, et al. Reconsidering the role of social disadvantage in physical and mental health: stressful life events, health behaviors, race, and depression. *American journal of epidemiology*. 2010;172(11):1238-49. Epub 2010/10/05.
20. Minami H, McCarthy DE, Jorenby DE, Baker TB. An ecological momentary assessment analysis of relations among coping, affect and smoking during a quit attempt. *Addiction (Abingdon, England)*. 2011;106(3):641-50.
21. Morris CD, May MG, Devine K, Smith S, DeHay T, Mahalik J. Multiple perspectives on tobacco use among youth with mental health disorders and addictions. *American journal of health promotion : AJHP*. 2011;25(5 Suppl):S31-7. Epub 2011/04/29.

22. Mullane JC, Stewart SH, Rhyno E, Steeves D, Watt M, Eisner A. Anxiety, sensitivity and difficulties with smoking cessation. Columbus, Alexandra M [Ed]. 2008;54:141-55.
23. Olivier D, Lubman DI, Fraser R. Tobacco smoking within psychiatric inpatient settings: biopsychosocial perspective. Australian & New Zealand Journal of Psychiatry. 2007;41(7):572-80.
24. Palm KM, Abrantes AM, Strong DR, Ramsey SE, Brown RA. Smoking Characteristics of Adolescent Smokers With Post-traumatic Stress Disorder in a Psychiatric Inpatient Setting. Journal of Dual Diagnosis. 2009;5(1):14-29.
25. Piper ME, Cook JW, Schlam TR, Jorenby DE, Baker TB. Anxiety diagnoses in smokers seeking cessation treatment: relations with tobacco dependence, withdrawal, outcome and response to treatment. Addiction (Abingdon, England). 2011;106(2):418-27.
26. Prochaska JJ, Rossi JS, Redding CA, Rosen AB, Tsoh JY, Humfleet GL, et al. Depressed smokers and stage of change: implications for treatment interventions. Drug & Alcohol Dependence. 2004;76(2):143-51.
27. Reid MS, Jiang H, Fallon B, Sonne S, Rinaldi P, Turrigiano E, et al. Smoking cessation treatment among patients in community-based substance abuse rehabilitation programs: exploring predictors of outcome as clues toward treatment improvement. The American journal of drug and alcohol abuse. 2011;37(5):472-8. Epub 2011/08/23.
28. Reilly P, Murphy L, Alderton D. Challenging the smoking culture within a mental health service supportively. International Journal of Mental Health Nursing. 2006;15(4):272-8.
29. Richards CS, Cohen LM, Morrell HE, Watson NL, Low BE. Treating depressed and anxious smokers in smoking cessation programs. Journal of consulting and clinical psychology. 2013;81(2):263-73. Epub 2012/03/21.
30. Selby P, Voci SC, Zawertailo LA, George TP, Brands B. Individualized smoking cessation treatment in an outpatient setting: Predictors of outcome in a sample with psychiatric and addictions co-morbidity. Addictive behaviors. 2010;35(9):811-7.
31. Stein MD, Anderson BJ, Niaura R. Smoking cessation patterns in methadone-maintained smokers. Nicotine and Tobacco Research. 2007;9(3):421-8.
32. Swan GE, Jack LM, Curry S, Chorost M, Javitz H, McAfee T, et al. Bupropion SR and counseling for smoking cessation in actual practice: Predictors of outcome. Nicotine and Tobacco Research. 2003;5(6):911-21.
33. Turner LR, Mermelstein R, Hitsman B, Warnecke RB. Social support as a moderator of the relationship between recent history of depression and smoking cessation among lower-educated women. Nicotine and Tobacco Research. 2008;10(1):201-12.

#### *Population level study*

1. John U, Meyer C, Rumpf HJ, Hapke U. Smoking, nicotine dependence and psychiatric comorbidity--a population-based study including smoking cessation after three years. Drug and alcohol dependence. 2004;76(3):287-95. Epub 2004/11/25.

#### *Reviews (reviews conducted on smoking within the defined disadvantaged group but not reporting on perceived barriers to smoking cessation)*

1. Ameringer KJ, Leventhal AM. Applying the tripartite model of anxiety and depression to cigarette smoking: an integrative review. Nicotine & tobacco research : official journal of the Society for Research on Nicotine and Tobacco. 2010;12(12):1183-94. Epub 2010/11/03.
2. Arfken CL. E. A review: Depression and smoking. Ethnicity and Disease. 2007;17(SUPPL. 3):S3-16-S3-8.
3. Aubin HJ, Rollema H, Svensson TH, Winterer G. Smoking, quitting, and psychiatric disease: a review. Neuroscience and biobehavioral reviews. 2012;36(1):271-84. Epub 2011/07/05.
4. Banham L, Gilbody S. Smoking cessation in severe mental illness: what works? Addiction (Abingdon, England). 2010;105(7):1176-89.

- 1
  - 2
  - 3
  - 4
  - 5
  - 6
  - 7
  - 8
  - 9
  - 10
  - 11
  - 12
  - 13
  - 14
  - 15
  - 16
  - 17
  - 18
  - 19
  - 20
  - 21
  - 22
  - 23
  - 24
  - 25
  - 26
  - 27
  - 28
  - 29
  - 30
  - 31
  - 32
  - 33
  - 34
  - 35
  - 36
  - 37
  - 38
  - 39
  - 40
  - 41
  - 42
  - 43
  - 44
  - 45
  - 46
  - 47
  - 48
  - 49
  - 50
  - 51
  - 52
  - 53
  - 54
  - 55
  - 56
  - 57
  - 58
  - 59
  - 60
5. el-Guebaly N, Cathcart J, Currie S, Brown D, Gloster S. Smoking cessation approaches for persons with mental illness or addictive disorders. *Psychiatric Services*. 2002;53(9):1166-70.
6. Fagerström K, Aubin H. Management of smoking cessation in patients with psychiatric disorders. *Current Medical Research & Opinion*. 2009;25(2):511-8.
7. Fu SS, McFall M, Saxon AJ, Beckham JC, Carmody TP, Baker DG, et al. Post-traumatic stress disorder and smoking: A systematic review. *Nicotine and Tobacco Research*. 2007;9(11):1071-84.
8. Goldberg JO. Successful change in tobacco use in schizophrenia. *Journal of the American Psychiatric Nurses Association*. 2010;16(1):30-5. Epub 2010/01/01.
9. Guydish J, Passalacqua E, Tajima B, Manser ST. Staff smoking and other barriers to nicotine dependence intervention in addiction treatment settings: a review. *Journal of psychoactive drugs*. 2007;39(4):423-33. Epub 2008/02/29.
10. Hitsman B, Borrelli B, McChargue DE, Spring B, Niaura R. History of depression and smoking cessation outcome: a meta-analysis. *Journal of consulting and clinical psychology*. 2003;71(4):657-63. Epub 2003/08/20.
11. Ischaki E, Gratziau C. Smoking and depression: Is smoking cessation effective? *Therapeutic advances in respiratory disease*. 2009;3(1):31-8.
12. Mathers M, Toumbourou JW, Catalano RF, Williams J, Patton GC. Consequences of youth tobacco use: a review of prospective behavioural studies. *Addiction (Abingdon, England)*. 2006;101(7):948-58.
13. Mills EJ, Wu P, Lockhart I, Wilson K, Ebbert JO. Adverse events associated with nicotine replacement therapy (NRT) for smoking cessation. A systematic review and meta-analysis of one hundred and twenty studies involving 177,390 individuals. *Tobacco Induced Diseases*. 2010;8:15p.
14. Mookadam F, Arthur HM. Social support and its relationship to morbidity and mortality after acute myocardial infarction: Systematic overview. *Archives of Internal Medicine*. 2004;164(14):1514-8.
15. Rasmussen AM, Picciotto MR, Krishnan-Sarin S. Smoking as a complex but critical covariate in neurobiological studies of posttraumatic stress disorders: A review. *Journal of Psychopharmacology*. 2006;20(5):693-707.
16. Schroeder SA, Morris CD. Confronting a neglected epidemic: tobacco cessation for persons with mental illnesses and substance abuse problems. *Annual review of public health*. 2010;31:297-314 1p following Epub 2009/12/17.
17. Sharp DL, Blaakman SW. A review of research by nurses regarding tobacco dependence and mental health. *Annual review of nursing research*. 2009;27:297-318.
18. Shirani A, Tremlett H. The effect of smoking on the symptoms and progression of multiple sclerosis: A review. *Journal of Inflammation Research*. 2010;3(1):115-26.
19. Silvani P, Camporesi A. Drug-induced pulmonary hypertension in newborns: A review. *Current Vascular Pharmacology*. 2007;5(2):129-33.
20. Siru R, Hulse GK, Tait RJ. Assessing motivation to quit smoking in people with mental illness: a review. *Addiction (Abingdon, England)*. 2009;104(5):719-33. Epub 2009/05/06.
21. Small G, Dubois B. A review of compliance to treatment in Alzheimer's disease: Potential benefits of a transdermal patch. *Current medical research and opinion*. 2007;23(11):2705-13.
22. Torchalla I, Nosen L, Rostam H, Allen P. Integrated treatment programs for individuals with concurrent substance use disorders and trauma experiences: a systematic review and meta-analysis. *Journal of substance abuse treatment*. 2012;42(1):65-77. Epub 2011/11/01.
23. Ziedonis D, Montoya ID. Tobacco Dependence Amongst Individuals with Schizophrenia: A Public Health Crisis and an Opportunity for Bidirectional Translational Research. *Journal of Dual Diagnosis*. 2007;3(3-4):3-7.
24. Ziedonis D, Parks J, Zimmermann MH, McCabe P. Program and System Level Interventions to Address Tobacco Amongst Individuals with Schizophrenia. *Journal of Dual Diagnosis*. 2007;3(3-4):151-75.

*Studies not meeting the subgroup definition*

1. Allen SS, Hatsukami DK, Christianson D. Nicotine withdrawal and depressive symptomatology during short-term smoking abstinence: A comparison of postmenopausal women using and not using hormone replacement therapy. *Nicotine and Tobacco Research*. 2003;5(1):49-59.
2. Baker A, Ivers RG, Bowman J, Butler T, Kay-Lambkin FJ, Wye P, et al. Where there's smoke, there's fire: high prevalence of smoking among some sub-populations and recommendations for intervention. *Drug and alcohol review*. 2006;25(1):85-96. Epub 2006/02/24.
3. Gehricke JG, Loughlin SE, Whalen CK, Potkin SG, Fallon JH, Jamner LD, et al. Smoking to self-medicate attentional and emotional dysfunctions. *Nicotine & tobacco research : official journal of the Society for Research on Nicotine and Tobacco*. 2007;9 Suppl 4:S523-36. Epub 2008/08/30.
4. Gierisch JM, Straits-Troster K, Calhoun PS, Beckham JC, Acheson S, Hamlett-Berry K. Tobacco use among Iraq- and Afghanistan-era veterans: a qualitative study of barriers, facilitators, and treatment preferences. *Preventing chronic disease*. 2012;9:E58. Epub 2012/02/18.
5. Gonzalez A, Zvolensky MJ, Vujanovic AA, Leyro TM, Marshall EC. An evaluation of anxiety sensitivity, emotional dysregulation, and negative affectivity among daily cigarette smokers: relation to smoking motives and barriers to quitting. *Journal of psychiatric research*. 2008;43(2):138-47. Epub 2008/04/18.
6. Kraemer KM, McLeish AC, Jeffries ER, Avallone KM, Luberto CM. Distress tolerance and perceived barriers to smoking cessation. *Substance abuse : official publication of the Association for Medical Education and Research in Substance Abuse*. 2013;34(3):277-82. Epub 2013/07/13.
7. Lawn S. Australians with mental illness who smoke. *The British journal of psychiatry : the journal of mental science*. 2001;178(1):85. Epub 2001/01/03.
8. McNeill A, Amos A, McEwen A, Ferguson J, Croghan E. Developing the evidence base for addressing inequalities and smoking in the United Kingdom. *Addiction (Abingdon, England)*. 2012;107 Suppl 2:1-7. Epub 2012/11/21.
9. Moss TG, Weinberger AH, Vessicchio JC, Mancuso V, Cushing SJ, Pett M, et al. A tobacco reconceptualization in psychiatry: toward the development of tobacco-free psychiatric facilities. *American Journal on Addictions*. 2010;19(4):293-311.
10. Nichols L, Martindale-Adams J, Burns R, Coon D, Ory M, Mahoney D, et al. Social marketing as a framework for recruitment: illustrations from the REACH study. *Journal of aging and health*. 2004;16(5 Suppl):157S-76S. Epub 2004/09/28.
11. Prochaska JJ, Sorensen JL, Hall SM, Rossi JS, Redding CA, Rosen AB, et al. Predictors of health functioning in two high-risk groups of smokers. *Drug & Alcohol Dependence*. 2005;78(2):169-75.
12. Shirley DK, Kesari RK, Glesby MJ. Factors associated with smoking in HIV-infected patients and potential barriers to cessation. *AIDS patient care and STDs*. 2013;27(11):604-12. Epub 2013/10/22.
13. Wye P, Bowman J, Wiggers J, Baker A, Knight J, Carr V, et al. Total smoking bans in psychiatric inpatient services: a survey of perceived benefits, barriers and support among staff. *BMC public health*. 2010;10:372. Epub 2010/06/26.

**Homeless studies***Intervention studies*

1. Businelle MS, Kendzor DE, Kesh A, Cuate EL, Poonawalla IB, Reitzel LR, et al. Small financial incentives increase smoking cessation in homeless smokers: a pilot study. *Addict Behav*. 2014;39(3):717-20. Epub 2013/12/11.

2. Goldade K, Whembolua GL, Thomas J, Eischen S, Guo H, Connett J, et al. Designing a smoking cessation intervention for the unique needs of homeless persons: a community-based randomized clinical trial. *Clinical trials (London, England)*. 2011;8(6):744-54. Epub 2011/12/15.
3. Monso E, Campbell J, Tonnesen P, Gustavsson G, Morera J. Sociodemographic predictors of success in smoking intervention. *Tobacco control*. 2001;10(2):165-9.
4. Okuyemi KS, Goldade K, Whembolua GL, Thomas JL, Eischen S, Guo H, et al. Smoking characteristics and comorbidities in the power to quit randomized clinical trial for homeless smokers. *Nicotine & tobacco research : official journal of the Society for Research on Nicotine and Tobacco*. 2013;15(1):22-8. Epub 2012/05/17.
5. Okuyemi KS, Thomas JL, Hall S, Nollen NL, Richter KP, Jeffries SK, et al. Smoking cessation in homeless populations: a pilot clinical trial. *Nicotine & tobacco research : official journal of the Society for Research on Nicotine and Tobacco*. 2006;8(5):689-99. Epub 2006/09/30.
6. Shelley D, Cantrell J, Wong S, Warn D. Smoking cessation among sheltered homeless: a pilot. *American journal of health behavior*. 2010;34(5):544-52. Epub 2010/06/09.

*No discussion of barriers*

1. Torchalla I, Strehlau V, Okoli CT, Li K, Schuetz C, Krausz M. Smoking and predictors of nicotine dependence in a homeless population. *Nicotine & tobacco research : official journal of the Society for Research on Nicotine and Tobacco*. 2011;13(10):934-42. Epub 2011/05/31.

*No discussion of barriers to smoking cessation (e..g might be barreirs to accessing health care in general)*

1. Aloom CB, Vredevoe DL, Brecht ML. Evaluation of high-risk smoking practices used by the homeless. *Cancer nursing*. 1993;16(2):123-30. Epub 1993/04/01.
2. Baggett TP, O'Connell JJ, Singer DE, Rigotti NA. The unmet health care needs of homeless adults: a national study. *American journal of public health*. 2010;100(7):1326-33. Epub 2010/05/15.
3. Baggett TP, Rigotti NA. Cigarette smoking and advice to quit in a national sample of homeless adults. *American journal of preventive medicine*. 2010;39(2):164-72. Epub 2010/07/14.
4. Butler J, Okuyemi KS, Jean S, Nazir N, Ahluwalia JS, Resnicow K. Smoking characteristics of a homeless population. *Substance abuse : official publication of the Association for Medical Education and Research in Substance Abuse*. 2002;23(4):223-31. Epub 2002/11/20.
5. Gelberg L, Andersen RM, Leake BD. The Behavioral Model for Vulnerable Populations: application to medical care use and outcomes for homeless people. *Health services research*. 2000;34(6):1273-302. Epub 2000/02/02.
6. Gelberg L, Gallagher TC, Andersen RM, Koegel P. Competing priorities as a barrier to medical care among homeless adults in Los Angeles. *American journal of public health*. 1997;87(2):217-20. Epub 1997/02/01.
7. Heffron WA, Skipper BJ, Lambert L. Health and lifestyle issues as risk factors for homelessness. *The Journal of the American Board of Family Practice / American Board of Family Practice*. 1997;10(1):6-12.
8. Kushel MB, Vittinghoff E, Haas JS. Factors associated with the health care utilization of homeless persons. *JAMA : the journal of the American Medical Association*. 2001;285(2):200-6. Epub 2001/02/15.
9. Malloy C, Christ MA, Hohloch FJ. The homeless: social isolates. *Journal of community health nursing*. 1990;7(1):25-36. Epub 1990/01/01.
10. McGuire J, Rosenheck R. The quality of preventive medical care for homeless veterans with mental illness. *Journal for Healthcare Quality: Promoting Excellence in Healthcare*. 2005;27(6):26-32.
11. Ober K, Carlson L, Anderson P. Cardiovascular risk factors in homeless adults. *The Journal of cardiovascular nursing*. 1997;11(4):50-9. Epub 1997/07/01.

12. O'Toole TP, Gibbon JL, Hanusa BH, Fine MJ. Utilization of health care services among subgroups of urban homeless and housed poor. *Journal of health politics, policy and law*. 1999;24(1):91-114. Epub 1999/05/26.
13. Padgett D, Struening EL, Andrews H. Factors affecting the use of medical, mental health, alcohol, and drug treatment services by homeless adults. *Medical care*. 1990;28(9):805-21. Epub 1990/09/01.
14. Robertson MJ, Cousineau MR. Health status and access to health services among the urban homeless. *American journal of public health*. 1986;76(5):561-3. Epub 1986/05/01.
15. Thompson SJ. Risk/protective factors associated with substance use among runaway/homeless youth utilizing emergency shelter services nationwide. *Substance Abuse*. 2004;25(3):13-26.
16. Thompson SJ, Zittell-Palamara KM, Forehand G. Risk factors for cigarette, alcohol, and marijuana use among runaway youth utilizing two services sectors. *Journal of Child & Adolescent Substance Abuse*. 2005;15(1):17-36.
17. Wojtusik L, White MC. Health status, needs, and health care barriers among the homeless. *Journal of health care for the poor and underserved*. 1998;9(2):140-52. Epub 1999/03/12.

*Not reporting the perceived self-reported barriers to smoking cessation (e.g. might report results of logistic regressions showing nicotine dependence associated with cessation success)*

1. Baggett TP, Anderson R, Freyder PJ, Jarvie JA, Maryman K, Porter J, et al. Addressing tobacco use in homeless populations: a survey of health care professionals. *Journal of health care for the poor and underserved*. 2012;23(4):1650-9. Epub 2012/01/01.
2. Baggett TP, Lebrun-Harris LA, Rigotti NA. Homelessness, cigarette smoking and desire to quit: results from a US national study. *Addiction (Abingdon, England)*. 2013;108(11):2009-18. Epub 2013/07/10.
3. Bassuk EL, Buckner JC, Perloff JN, Bassuk SS. Prevalence of mental health and substance use disorders among homeless and low-income housed mothers. *The American journal of psychiatry*. 1998;155(11):1561-4. Epub 1998/11/13.
4. Diaz T, Dusenbury L, Botvin GJ, Farmer-Huselid R. Factors associated with drug use among youth living in homeless shelters. *Journal of Child & Adolescent Substance Abuse*. 1997;6(1):91-110.
5. Greene JM, Ennett ST, Ringwalt CL. Substance use among runaway and homeless youth in three national samples. *American journal of public health*. 1997;87(2):229-35.
6. Kim DH, Daskalakis C, Plumb JD, Adams S, Brawer R, Orr N, et al. Modifiable cardiovascular risk factors among individuals in low socioeconomic communities and homeless shelters. *Family & community health*. 2008;31(4):269-80. Epub 2008/09/17.
7. Lee TC, Hanlon JG, Ben-David J, Booth GL, Cantor WJ, Connelly PW, et al. Risk factors for cardiovascular disease in homeless adults. *Circulation*. 2005;111(20):2629-35.
8. Thompson RG, Hasin DS. Cigarette, marijuana, and alcohol use and prior drug treatment among newly homeless young adults in New York City: Relationship to a history of foster care. *Drug and alcohol dependence*. 2011;117(1):66-9. Epub 2011/02/04.

*Reviews (reviews conducted on smoking within the defined disadvantaged group but not reporting on perceived barriers to smoking cessation)*

1. Baggett TP, Tobey ML, Rigotti NA. Tobacco use among homeless people--addressing the neglected addiction. *The New England journal of medicine*. 2013;369(3):201-4. Epub 2013/07/19.
2. Fazel S, Khosla V, Doll H, Geddes J. The prevalence of mental disorders among the homeless in western countries: systematic review and meta-regression analysis. *PLoS medicine*. 2008;5(12):e225. Epub 2008/12/05.

3. Hwang SW, Tolomiczenko G, Kouyoumdjian FG, Garner RE. Interventions to improve the health of the homeless: a systematic review. *American journal of preventive medicine*. 2005;29(4):311-9. Epub 2005/10/26.

#### *Studies not meeting the subgroup definition*

1. Cousineau MR. Health status of and access to health services by residents of urban encampments in Los Angeles. *Journal of health care for the poor and underserved*. 1997;8(1):70-82. Epub 1997/02/01.
2. Epstein JA, Williams C, Botvin GJ, Diaz T, Ifill-Williams M. Psychosocial predictors of cigarette smoking among adolescents living in public housing developments. *Tobacco control*. 1999;8(1):45-52.
3. Kruger TM, Howell BM, Haney A, Davis RE, Fields N, Schoenberg NE. Perceptions of smoking cessation programs in rural Appalachia. *American journal of health behavior*. 2012;36(3):373-84. Epub 2012/03/01.
4. Wilson MC. Health practices of homeless women: Duquesne University; 2003.

#### **Prisoner studies**

##### *Intervention studies*

1. Berg CJ, Ahluwalia JS, Cropsey K. Predictors of adherence to behavioral counseling and medication among female prisoners enrolled in a smoking cessation trial. *Journal of correctional health care : the official journal of the National Commission on Correctional Health Care*. 2013;19(4):236-47. Epub 2013/08/21.
2. Cropsey K, Eldridge G, Weaver M, Villalobos G, Stitzer M, Best A. Smoking cessation intervention for female prisoners: addressing an urgent public health need. *American journal of public health*. 2008;98(10):1894-901.
3. Cropsey KL, Jackson DO, Hale GJ, Carpenter MJ, Stitzer ML. Impact of self-initiated pre-quit smoking reduction on cessation rates: results of a clinical trial of smoking cessation among female prisoners. *Addictive behaviors*. 2011;36(1-2):73-8. Epub 2010/10/05.
4. Cropsey KL, McClure LA, Jackson DO, Villalobos GC, Weaver MF, Stitzer ML. The impact of quitting smoking on weight among women prisoners participating in a smoking cessation intervention. *American journal of public health*. 2010;100(8):1442-8.
5. Khavjou OA, Clarke J, Hofeldt RM, Lihs P, Loo RK, Prabhu M, et al. A Captive Audience. Bringing the WISEWOMAN Program to South Dakota Prisoners. *Women's Health Issues*. 2007;17(4):193-201.
6. Lasnier B, Cantinotti M, Guyon L, Royer A, Brochu S, Chayer L. Implementing an indoor smoking ban in prison: enforcement issues and effects on tobacco use, exposure to second-hand smoke and health of inmates. *Canadian Journal of Public Health*. 2011;102(4):249-53.

##### *No discussion of barriers*

1. Foley KL, Proescholdbell S, Herndon Malek S, Johnson J. Implementation and enforcement of tobacco bans in two prisons in North Carolina: a qualitative inquiry. *Journal of correctional health care : the official journal of the National Commission on Correctional Health Care*. 2010;16(2):98-105. Epub 2010/03/27.
2. Kauffman RM, Ferketich AK, Murray DM, Bellair PE, Wewers ME. Measuring tobacco use in a prison population. *Nicotine & Tobacco Research*. 2010;12(6):582-8.
3. Kauffman RM, Ferketich AK, Wewers ME. Tobacco policy in American prisons, 2007. *Tobacco control*. 2008;17(5):357-60.

1  
2  
3  
4  
5  
6  
7  
8  
9  
10  
11  
12  
13  
14  
15  
16  
17  
18  
19  
20  
21  
22  
23  
24  
25  
26  
27  
28  
29  
30  
31  
32  
33  
34  
35  
36  
37  
38  
39  
40  
41  
42  
43  
44  
45  
46  
47  
48  
49  
50  
51  
52  
53  
54  
55  
56  
57  
58  
59  
60

*Not carried out in high income country/not published in English*

1. Blanc A, Telmon N, Rouge D. Types of addictive behaviour in prisoners in the Toulouse region. [French]Conduites addictives chez les detenus des prisons de la region Toulousaine. *Journal de Medecine Legale Droit Medical*. 2001;44(5-6):421-9.

*Not reporting the perceived self-reported barriers to smoking cessation (e.g. might report results of logistic regressions showing nicotine dependence associated with cessation success)*

1. Belcher JM, Butler T, Richmond RL, Wodak AD, Wilhelm K. Smoking and its correlates in an Australian prisoner population. *Drug and Alcohol Review*. 2006;25(4):343-8.
2. Cropsey K, Eldridge GD, Ladner T. Smoking among female prisoners: an ignored public health epidemic. *Addictive behaviors*. 2004;29(2):425-31. Epub 2004/01/21.
3. Cropsey KL, Linker JA, Waite DE. An analysis of racial and sex differences for smoking among adolescents in a juvenile correctional center. *Drug & Alcohol Dependence*. 2008;92(1-3):156-63.
4. Durrah TL. Correlates of daily smoking among female arrestees in New York City and Los Angeles, 1997. *American journal of public health*. 2005;95(10):1788-92.
5. El-Guebaly N, Cathcart J, Currie S, Brown D, Gloster S. Public health and therapeutic aspects of smoking bans in mental health and addiction settings. *Psychiatric services (Washington, DC)*. 2002;53(12):1617-22. Epub 2002/12/04.
6. Lekka NP, Lee KH, Argyriou AA, Beratis S, Parks RW. Association of cigarette smoking and depressive symptoms in a forensic population. *Depression and Anxiety*. 2007;24(5):325-30.
7. Lincoln T, Tuthill RW, Roberts CA, Kennedy S, Hammett TM, Langmore-Avila E, et al. Resumption of smoking after release from a tobacco-free correctional facility. *Journal of Correctional Health Care*. 2009;15(3):190-6.
8. Makris E, Gourgoulianis KI, Hatzoglou C. Prisoners and cigarettes or 'imprisoned in cigarettes'? What helps prisoners quit smoking? *BMC public health*. 2012;12:508. Epub 2012/07/10.
9. Nijhawan AE, Salloway R, Nunn AS, Poshkus M, Clarke JG. Preventive healthcare for underserved women: results of a prison survey. *Journal of women's health (2002)*. 2010;19(1):17-22. Epub 2010/01/22.
10. Ramaswamy M, Faseru B, Cropsey KL, Jones M, Deculus K, Freudenberg N. Factors associated with smoking among adolescent males prior to incarceration and after release from jail: a longitudinal study. *Substance abuse treatment, prevention, and policy*. 2013;8(1):37. Epub 2013/11/02.
11. Richmond RL, Wilhelm KA, Indig D, Butler TG, Archer VA, Wodak AD. Cardiovascular risk among Aboriginal and non-Aboriginal smoking male prisoners: inequalities compared to the wider community. *BMC public health*. 2011;11:783. Epub 2011/10/12.
12. Thibodeau L, Jorenby DE, Seal DW, Kim SY, Sosman JM. Prerelease intent predicts smoking behavior postrelease following a prison smoking ban. *Nicotine and Tobacco Research*. 2010;12(2):152-8.

*Reviews (reviews conducted on smoking within the defined disadvantaged group but not reporting on perceived barriers to smoking cessation)*

1. Donahue JJ. Tobacco Smoking Among Incarcerated Individuals: A Review of the Nature of the Problem and What is Being Done in Response. *Journal of Offender Rehabilitation*. 2009;48(7):589-604.



1  
2  
3  
4  
5  
6  
7  
8  
9  
10  
11  
12  
13  
14  
15  
16  
17  
18  
19  
20  
21  
22  
23  
24  
25  
26  
27  
28  
29  
30  
31  
32  
33  
34  
35  
36  
37  
38  
39  
40  
41  
42  
43  
44  
45  
46  
47  
48  
49  
50  
51  
52  
53  
54  
55  
56  
57  
58  
59  
60

*Studies not meeting the subgroup definition*

1. Dickens GL, Stubbs JH, Haw CM. Smoking and mental health nurses: a survey of clinical staff in a psychiatric hospital. *Journal of psychiatric and mental health nursing*. 2004;11(4):445-51. Epub 2004/07/17.

**At risk youth studies**

*Intervention studies*

1. Horn K, Dino G, Kalsekar I, Massey CJ, Manzo-Tennant K, McGloin T. Exploring the relationship between mental health and smoking cessation: a study of rural teens. *Prevention science : the official journal of the Society for Prevention Research*. 2004;5(2):113-26. Epub 2004/05/12.
2. Kelly AB. Predictors of response to brief smoking cessation interventions for adolescents who have contravened school smoking policy. *Journal of Substance Use*. 2008;13(4):219-24.
3. Post A, Gilljam H, Bremberg S, Galanti MR. Psychosocial determinants of attrition in a longitudinal study of tobacco use in youth. *TheScientificWorldJournal*. 2012;2012:654030. Epub 2012/06/01.

*No discussion of barriers*

1. Akers RL, Lee G. A longitudinal test of social learning theory: Adolescent smoking. *Journal of Drug Issues*. 1996;26(2):317-43.
2. Hanson MJ. The theory of planned behavior applied to cigarette smoking in African-American, Puerto Rican, and non-Hispanic white teenage females. *Nursing research*. 1997;46(3):155-62.
3. Luke DA, Stamatakis KA, Brownson RC. State youth-access tobacco control policies and youth smoking behavior in the United States. *American journal of preventive medicine*. 2000;19(3):180-7.

*No discussion of barriers to smoking cessation (e.g might be barreirs to accessing health care in general)*

1. Diaz T, Dusenbury L, Botvin GJ, Farmer-Huselid R. Factors associated with drug use among youth living in homeless shelters. *Journal of Child & Adolescent Substance Abuse*. 1997;6(1):91-110.
2. Donaghy E, Bauld L, Eadie D, McKell J, Pringle B, Amos A. A qualitative study of how young Scottish smokers living in disadvantaged communities get their cigarettes. *Nicotine & tobacco research : official journal of the Society for Research on Nicotine and Tobacco*. 2013;15(12):2053-9. Epub 2013/08/06.
3. Hansen WB, Collins LM, Johnson CA, Graham JW. Self-initiated smoking cessation among high school students. *Addictive Behaviors*. 1985;10(3):265-71.
4. Lipperman-Kreda S, Paschall MJ, Grube JW. Perceived enforcement of school tobacco policy and adolescents' cigarette smoking. *Preventive Medicine*. 2009;48(6):562-6.
5. Rooke C, Amos A, Hight G, Hargreaves K. Smoking spaces and practices in pubs, bars and clubs: young adults and the English smokefree legislation. *Health & place*. 2013;19:108-15. Epub 2012/12/12.

*Not carried out in high income country/not published in English*

1. Malhotra C, Sharma N, Saxena R, Ingle GK. Drug use among juveniles in conflict with the law. *Indian Journal of Pediatrics*. 2007;74(4):353-6.

- 1
  - 2
  - 3
  - 4
  - 5
  - 6
  - 7
  - 8
  - 9
  - 10
  - 11
  - 12
  - 13
  - 14
  - 15
  - 16
  - 17
  - 18
  - 19
  - 20
  - 21
  - 22
  - 23
  - 24
  - 25
  - 26
  - 27
  - 28
  - 29
  - 30
  - 31
  - 32
  - 33
  - 34
  - 35
  - 36
  - 37
  - 38
  - 39
  - 40
  - 41
  - 42
  - 43
  - 44
  - 45
  - 46
  - 47
  - 48
  - 49
  - 50
  - 51
  - 52
  - 53
  - 54
  - 55
  - 56
  - 57
  - 58
  - 59
  - 60
2. Manolova A. Adolescent smoking and social environment. Archives of the Balkan Medical Union. 2005;40(1):7-11.
  3. Ng N, Weinehall L, Ohman A. 'If I don't smoke, I'm not a real man' Indonesian teenage boys' views about smoking. Health education research. 2007;22(6):794-804.

*Not reporting the perceived self-reported barriers to smoking cessation (e.g. might report results of logistic regressions showing nicotine dependence associated with cessation success)*

1. Bean MK, Mitchell KS, Speizer IS, Wilson DB, Smith BN, Fries EA. Rural adolescent attitudes toward smoking and weight loss: relationship to smoking status. Nicotine & tobacco research : official journal of the Society for Research on Nicotine and Tobacco. 2008;10(2):279-86. Epub 2008/02/01.
2. Beebe LA, Vesely SK, Oman RF, Tolma E, Aspy CB, Rodine S. Protective assets for non-use of alcohol, tobacco and other drugs among urban American Indian youth in Oklahoma. Maternal and child health journal. 2008;12(SUPPL. 1):S82-S90.
3. Belgrave FZ, Johnson J, Nguyen A, Hood K, Tademy R, Clark T, et al. Stress and tobacco use among African-American adolescents: the buffering effect of cultural factors. Journal of Drug Education. 2010;40(2):173-88.
4. Booker CL, Gallaher P, Unger JB, Ritt-Olson A, Johnson CA. Stressful life events, smoking behavior, and intentions to smoke among and multiethnic sample of sixth graders. Ethnicity & health. 2004;9(4):369-97.
5. Colgan Y, Turnbull DA, Mikocka-Walus AA, Delfabbro P. Determinants of resilience to cigarette smoking among young Australians at risk: An exploratory study. Tobacco Induced Diseases. 2010;8(1).
6. Conwell LS, O'Callaghan MJ, Andersen MJ, Bor W, Najman JM, Williams GM. Early adolescent smoking and a web of personal and social disadvantage. Journal of Paediatrics & Child Health. 2003;39(8):580-5.
7. Dozois DN, Farrow JA, Miser A. Smoking patterns and cessation motivations during adolescence. The International journal of the addictions. 1995;30(11):1485-98. Epub 1995/09/01.
8. Fettes DL, Aarons GA. Smoking behavior of US youths: a comparison between child welfare system and community populations. American journal of public health. 2011;101(12):2342-8.
9. Flynn BS, Worden JK, Secker-Walker RH, Pirie PL, Badger GJ, Carpenter JH. Long-term responses of higher and lower risk youths to smoking prevention interventions. Preventive Medicine. 1997;26(3):389-94.
10. Frohlich KL, Mykhalovskiy E, Poland BD, Haines-Saah R, Johnson J. Creating the socially marginalised youth smoker: the role of tobacco control. Sociology of health & illness. 2012;34(7):978-93. Epub 2012/03/06.
11. Glanz K, Mau M, Steffen A, Maskarinec G, Arriola KJ. Tobacco use among Native Hawaiian middle school students: Its prevalence, correlates and implications. Ethnicity and Health. 2007;12(3):227-44.
12. Hansen WB. Behavioral predictors of abstinence: early indicators of a dependence on tobacco among adolescents. International Journal of the Addictions. 1983;18(7):913-20.
13. Hanson MJ. An examination of ethnic differences in cigarette smoking intention among female teenagers. Journal of the American Academy of Nurse Practitioners. 2005;17(4):149-55.
14. Hanson MJS. African-American adolescents' intentions to smoke cigarettes: an application of the Theory of Planned Behavior. Journal of Gender, Culture, & Health. 1996;1(2):125-34.
15. Indig D, Haysom L. Smoking behaviours among young people in custody in New South Wales, Australia. Drug and alcohol review. 2012;31(5):631-7. Epub 2012/03/08.
16. Karcher MJ, Finn L. How connectedness contributes to experimental smoking among rural youth: developmental and ecological analyses. Journal of Primary Prevention. 2005;26(1):25-36.
17. Kerby DS, Brand MW, John R. Anger types and the use of cigarettes and smokeless tobacco among Native American adolescents. Preventive Medicine. 2003;37(5):485-91.

18. Leff MK, Moolchan ET, Cookus BA, Spurgeon L, Evans LA, London ED, et al. Predictors of smoking initiation among at risk youth: A controlled study. *Journal of Child & Adolescent Substance Abuse*. 2003;13(1):59-76.
19. LeMaster PL, Connell CM, Mitchell CM, Manson SM. Tobacco use among American Indian adolescents: protective and risk factors. *Journal of Adolescent Health*. 2002;30(6):426-32.
20. Ramsey SE, Brown RA, Strong DR, Sales SD. Cigarette smoking among adolescent psychiatric inpatients: Prevalence and correlates. *Annals of Clinical Psychiatry*. 2002;14(3):149-53.
21. Yu M, Stiffman AR, Freedenthal S. Factors affecting American Indian adolescent tobacco use. *Addictive Behaviors*. 2005;30(5):889-904.

*Reviews (reviews conducted on smoking within the defined disadvantaged group but not reporting on perceived barriers to smoking cessation)*

1. Cengelli S, O'Loughlin J, Lauzon B, Cornuz J. A systematic review of longitudinal population-based studies on the predictors of smoking cessation in adolescent and young adult smokers. *Tobacco control*. 2012;21(3):355-62. Epub 2011/08/19.
2. Johnston V, Westphal DW, Glover M, Thomas DP, Segan C, Walker N. Reducing smoking among indigenous populations: new evidence from a review of trials. *Nicotine & tobacco research : official journal of the Society for Research on Nicotine and Tobacco*. 2013;15(8):1329-38. Epub 2013/03/23.
3. Maharaj K, Ternullo S. Using nicotine replacement therapy in treating nicotine addiction in adolescents. *Journal of School Nursing*. 2001;17(5):278-82.

*Studies not meeting the subgroup definition*

1. Abernathy TJ, Bertrand LD. The prevalence of smokeless tobacco and cigarette use among sixth, seventh and eighth grade students: a longitudinal investigation. *Canadian Journal of Public Health*. 1992;83(1):15-8.
2. Audrain-McGovern J, Rodriguez D, Epstein LH, Rodgers K, Cuevas J, Wileyto EP. Young adult smoking: What factors differentiate ex-smokers, smoking cessation treatment seekers and nontreatment seekers? *Addictive Behaviors*. 2009;34(12):1036-41.
3. Barber P, Lopez-Valcarcel BG, Pinilla J, Santana Y, Calvo JR, Lopez A. Attitudes of teenagers towards cigarettes and smoking initiation. *Substance use & misuse*. 2005;40(5):625-43.
4. Leatherdale ST, Ahmed R. Alcohol, marijuana, and tobacco use among Canadian youth: do we need more multi-substance prevention programming? *Journal of Primary Prevention*. 2010;31(3):99-108.
5. Leatherdale ST, Ahmed R, Vu M. Factors associated with different cigarette access behaviours among underage smoking youth who usually smoke contraband (Native) cigarettes. *Canadian Journal of Public Health*. 2011;102(2):103-7.
6. Leatherdale ST, McDonald PW. Youth smokers' beliefs about different cessation approaches: are we providing cessation interventions they never intend to use? *Cancer Causes & Control*. 2007;18(7):783-91.
7. Leatherdale ST, McDonald PW, Cameron R, Jolin MA, Brown KS. A multi-level analysis examining how smoking friends, parents, and older students in the school environment are risk factors for susceptibility to smoking among non-smoking elementary school youth. *Prevention Science*. 2006;7(4):397-402.
8. Leavy J, Wood L, Phillips F, Rosenberg M. Try and try again--qualitative insights into adolescent smoking experimentation and notions of addiction. *Health Promotion Journal of Australia*. 2010;21(3):208-14.

- 1
  - 2
  - 3
  - 4
  - 5
  - 6
  - 7
  - 8
  - 9
  - 10
  - 11
  - 12
  - 13
  - 14
  - 15
  - 16
  - 17
  - 18
  - 19
  - 20
  - 21
  - 22
  - 23
  - 24
  - 25
  - 26
  - 27
  - 28
  - 29
  - 30
  - 31
  - 32
  - 33
  - 34
  - 35
  - 36
  - 37
  - 38
  - 39
  - 40
  - 41
  - 42
  - 43
  - 44
  - 45
  - 46
  - 47
  - 48
  - 49
  - 50
  - 51
  - 52
  - 53
  - 54
  - 55
  - 56
  - 57
  - 58
  - 59
  - 60
9. Leeman RF, Schepis TS, Cavallo DA, McFetridge AK, Liss TB, Krishnan-Sarin S. Nicotine dependence severity as a cross-sectional predictor of alcohol-related problems in a sample of adolescent smokers. *Nicotine & tobacco research : official journal of the Society for Research on Nicotine and Tobacco*. 2010;12(5):521-4.
10. Lowry R, Cohen LR, Modzeleski W, Kann L, Collins JL, Kolbe LJ. School violence, substance use, and availability of illegal drugs on school property among US high school students. *Journal of School Health*. 1999;69(9):347-55.
11. Maes HH, Woodard CE, Murrelle L, Meyer JM, Silberg JL, Hewitt JK, et al. Tobacco, alcohol and drug use in eight- to sixteen-year-old twins: the Virginia Twin Study of Adolescent Behavioral Development. *Journal of Studies on Alcohol*. 1999;60(3):293-305.
12. McGee R, Stanton WR. A longitudinal study of reasons for smoking in adolescence. *Addiction (Abingdon, England)*. 1993;88(2):265-71.
13. Milton B, Cook PA, Dugdill L, Porcellato L, Springett J, Woods SE. Why do primary school children smoke? A longitudinal analysis of predictors of smoking uptake during pre-adolescence. *Public Health*. 2004;118(4):247-55.
14. Milton MH, Maule CO, Backinger CL, Gregory DM. Recommendations and guidance for practice in youth tobacco cessation. *American journal of health behavior*. 2003;27:S159-69.
15. Quaranta JJI. Alcohol, tobacco, and other drug attitudes and use among adolescents with severe behavioral handicaps. *Dissertation Abstracts International Section A: Humanities and Social Sciences*. 1998;58(10-A):3890.

Supplementary file 2. Summaries of the included quantitative studies by disadvantaged group (n = 8).

| Author, Year, Country                | Study aims                                                                                                                         | Setting                                                  | Sample                                                                                                        | Response rate | Type of survey (cross-sectional, etc) | Outcome measure (and info on survey instrument)                                                                                       | Barriers to quitting (type and prevalence)                                                                                                                                                                                                                                                                                                                                                                                                       |
|--------------------------------------|------------------------------------------------------------------------------------------------------------------------------------|----------------------------------------------------------|---------------------------------------------------------------------------------------------------------------|---------------|---------------------------------------|---------------------------------------------------------------------------------------------------------------------------------------|--------------------------------------------------------------------------------------------------------------------------------------------------------------------------------------------------------------------------------------------------------------------------------------------------------------------------------------------------------------------------------------------------------------------------------------------------|
| <b>Quantitative studies</b>          |                                                                                                                                    |                                                          |                                                                                                               |               |                                       |                                                                                                                                       |                                                                                                                                                                                                                                                                                                                                                                                                                                                  |
| <b>Low income population</b>         |                                                                                                                                    |                                                          |                                                                                                               |               |                                       |                                                                                                                                       |                                                                                                                                                                                                                                                                                                                                                                                                                                                  |
| Price 1994(54)<br><br>USA            | Assess the perceptions of lung cancer and smoking in a socioeconomically disadvantaged sample.                                     | Telephone interviews in Ohio, USA.                       | n = 500<br>49% female<br>Age: mean = 58, SD = 18.2<br>Ethnicity: white (83%)                                  | 42%           | Cross-sectional.                      | Pre-designed survey instrument based on the Health Belief Model – 45 items.<br><br>Barriers: 5 items.<br>.79 reliability coefficient. | Habit: 82%<br>Prevents boredom: 48%<br>Helps to relax: 52%<br>Addiction: 86%<br>Many friends of smokers also smoke: 66%                                                                                                                                                                                                                                                                                                                          |
| Rosenthal et al 2013 (64)<br><br>USA | Identify the most endorse barriers and motivations to quitting an sociodemographic differences in the barriers to quitting report. | Six low income neighbourhoods in new haven, Connecticut. | n = 350<br>Ethnicity: 61% Black<br>20% Latino<br>12% White<br>Education: 56% High school diploma/ GED or less | 73%           | Cross-sectional                       | Gender, race/ethnicity, educational attainment, age, smoking status.<br>Barriers measure based on pre-existing survey (7 items).      | <i>Intrapersonal barriers</i><br>I don't want to quit: 37.4%<br>It is too difficult: 57.7%<br>I don't know how: 24.9%<br>I am afraid of gaining weight : 19.7%<br><i>Financial barrier</i><br>I can't afford the medication or nicotine replacement therapy products (such as the patch or gum): 30.9%<br><i>Support barrier</i><br>I don't have enough support: 25.7%<br><i>Social Influence barrier</i><br>Everyone I know uses tobacco: 33.1% |

1  
2  
3  
4  
5  
6  
7  
8  
9  
10  
11  
12  
13  
14  
15  
16  
17  
18  
19  
20  
21  
22  
23  
24  
25  
26  
27  
28  
29  
30  
31  
32  
33  
34  
35  
36  
37  
38  
39  
40  
41  
42  
43  
44  
45  
46  
47

| Author, Year, Country               | Study aims                                                                                                                                                          | Setting                                                    | Sample                       | Response rate | Type of survey (cross-sectional, etc) | Outcome measure (and info on survey instrument)                                                       | Barriers to quitting (type and prevalence)                                                                                                                                                                                                                                                                                                                                                                                                                                                                                                                                                                                                                                                                                                                                                                                                                                                 |
|-------------------------------------|---------------------------------------------------------------------------------------------------------------------------------------------------------------------|------------------------------------------------------------|------------------------------|---------------|---------------------------------------|-------------------------------------------------------------------------------------------------------|--------------------------------------------------------------------------------------------------------------------------------------------------------------------------------------------------------------------------------------------------------------------------------------------------------------------------------------------------------------------------------------------------------------------------------------------------------------------------------------------------------------------------------------------------------------------------------------------------------------------------------------------------------------------------------------------------------------------------------------------------------------------------------------------------------------------------------------------------------------------------------------------|
| <b>People with a mental illness</b> |                                                                                                                                                                     |                                                            |                              |               |                                       |                                                                                                       |                                                                                                                                                                                                                                                                                                                                                                                                                                                                                                                                                                                                                                                                                                                                                                                                                                                                                            |
| Asher et al 2003 (95)<br><br>USA    | Report the relative frequency of endorsement of the various barriers as a source of guidance for clinicians wanting to motivate alcoholic patients to quit smoking. | Urban inpatient state-subsidized substance abuse facility. | 96 alcohol dependent smokers | 73%           | Cross sectional survey                | 11 item True/False Barriers to Quitting Smoking in Substance Abuse Treatment (BQS-SAT) questionnaire. | If I quit smoking, I'll feel tense and irritable: 87%<br>If I quit smoking, I would feel anxious: 78%<br>When I don't smoke, I feel restless, and I can't concentrate: 56%<br>If I quit smoking, my urges to smoke will be so strong, I won't be able to stand it: 48%<br>I don't have the willpower to quit smoking: 47%<br>I need smoking to lift me up when I'm feeling down: 42%<br>Quitting smoking during substance abuse treatment would make it harder to stay sober: 41%<br>If I quit smoking, I would gain weight: 40%<br>Smoking gives me a lift when I'm feeling tired: 28%<br>If I quit smoking, I won't be able to sleep: 23%<br>If I quit smoking, my urges to drink or use drugs will be so strong I won't be able to stand it: 13%<br>Negative affect: 32%<br>Habit: 28%<br>Seeing others smoke or peer pressure: 22%.<br>Being addicted to more than one substance: 5% . |

| Author, Year, Country              | Study aims                                                                                                 | Setting                                  | Sample                                                                                                                                                 | Response rate | Type of survey (cross-sectional, etc) | Outcome measure (and info on survey instrument)                                        | Barriers to quitting (type and prevalence)                                                                                                                                                                                                                                                                                                                                                                                                                                       |
|------------------------------------|------------------------------------------------------------------------------------------------------------|------------------------------------------|--------------------------------------------------------------------------------------------------------------------------------------------------------|---------------|---------------------------------------|----------------------------------------------------------------------------------------|----------------------------------------------------------------------------------------------------------------------------------------------------------------------------------------------------------------------------------------------------------------------------------------------------------------------------------------------------------------------------------------------------------------------------------------------------------------------------------|
|                                    |                                                                                                            |                                          |                                                                                                                                                        |               |                                       |                                                                                        | Compulsion and mental urges: 3%                                                                                                                                                                                                                                                                                                                                                                                                                                                  |
| Carosella et al 1999 (82).<br>USA. | Assess the barriers to and facilitators of quitting smoking in long term care inpatients.                  | Long term psychiatric care units.        | n = 92<br>98% male<br>Age: mean = 47.6<br>Diagnoses: substance abuse (60.9%); schizophrenia (55.4%); affective disorders (38%).                        | 77.7%         | Interviews.                           | Smoking status and history, demographic information, reasons for not quitting smoking. | Enjoyment: 47.2%<br>Habit : 36.1%<br>Boredom: 12.5%<br>Anxiety, nerves: 11.1%<br>Smoking does me good (e.g., relaxing, stimulating, stifles pain): 9.7%<br>Availability of cigarettes: 6.9%<br>Never had a reason/need to stop: 6.9%<br>I have emotional problems: 6.9%<br>Other stressors: 5.6%<br>Concentrating on other addictions: 4.2%<br>Smoking helps your appetite/digestion: 4.2%<br>I need some help to stop: 4.2%<br>Sociability of smoking: 2.7%<br>Don't know: 2.7% |
| Orleans et al 1993<br>USA          | Aimed to inform the design of nicotine addiction treatments tailored for patients with chemical dependency | Inpatient substance use treatment centre | n = 78<br>78% male<br>mean age = 36.6 (SD = 10.1)<br>78%: alcohol<br>9% drug problems including cocaine, heroin, marijuana and prescription medication | Not reported  | Cross-sectional                       | Sociodemographic, smoking related characteristics, 9 item barriers survey.             | Missing or craving cigarettes: 68.4%<br>Being nervous, anxious or tense: 53.3%<br>Being around other smokers: 43.3%<br>Losing a pleasure: 39.4%<br>Coping with stress: 38.7%<br>Being afraid you'll fail: 27%<br>Gaining weight: 24.3%<br>Maintaining sobriety: 9.9%<br>Increased alcohol/drug use: 2.9%                                                                                                                                                                         |

1  
2  
3  
4  
5  
6  
7  
8  
9  
10  
11  
12  
13  
14  
15  
16  
17  
18  
19  
20  
21  
22  
23  
24  
25  
26  
27  
28  
29  
30  
31  
32  
33  
34  
35  
36  
37  
38  
39  
40  
41  
42  
43  
44  
45  
46  
47

| Author, Year, Country                 | Study aims                                                                                                                                       | Setting                                                                                                                                         | Sample                                                                                                                                                                   | Response rate | Type of survey (cross-sectional, etc) | Outcome measure (and info on survey instrument)                                                                                                                                                              | Barriers to quitting (type and prevalence)                                                                                                                                                                                                          |
|---------------------------------------|--------------------------------------------------------------------------------------------------------------------------------------------------|-------------------------------------------------------------------------------------------------------------------------------------------------|--------------------------------------------------------------------------------------------------------------------------------------------------------------------------|---------------|---------------------------------------|--------------------------------------------------------------------------------------------------------------------------------------------------------------------------------------------------------------|-----------------------------------------------------------------------------------------------------------------------------------------------------------------------------------------------------------------------------------------------------|
|                                       |                                                                                                                                                  |                                                                                                                                                 | 13% alcohol and other drug problems                                                                                                                                      |               |                                       |                                                                                                                                                                                                              |                                                                                                                                                                                                                                                     |
| <b>Homeless groups</b>                |                                                                                                                                                  |                                                                                                                                                 |                                                                                                                                                                          |               |                                       |                                                                                                                                                                                                              |                                                                                                                                                                                                                                                     |
| Arnstet et al 2004 (99).<br><br>USA.  | Evaluate predictors of readiness to quit and interest in cessation counselling in a homeless sample                                              | Homeless services at urban hospital                                                                                                             | n = 98<br>Age: mean = 44 years.<br>Median number of years homeless = 2.75<br>Predominantly white, unmarried, unemployed or disabled, males (proportions not provided).   | Not reported. | Cross-sectional.                      | Smoking behaviour, reasons for quitting, readiness to quit, history of homelessness, alcohol and other drug history, psychiatric history, medical history, quit attempts, social support.                    | 21% believe the people closest to them would be very helpful in quitting smoking.<br><br>29% endorsed the item "People closest to you want you to quit very much".                                                                                  |
| Connor et al. 2002 (100).<br><br>USA. | Ascertain the prevalence of smoking, smoking cessation and how various factors associated with homelessness impact on readiness to quit smoking. | Emergency homeless services, residential drug treatment services, drop in centres for homeless in the city of Pittsburgh (9 homeless services). | n = 230<br>Male = 81%<br>Age: mean = 41.8, SD = 10.7.<br>Ethnicity: 54% African Americans; 40% white; 3% Hispanic; 3% other.<br>Homelessness: 46% living in transitional | >97%          | Cross-sectional.                      | Demographics, substance use history, housing status, Fagerstrom Test of Nicotine Dependence, Stage of Change, self-efficacy, barriers to cessation (as 5 potential barriers: cravings, other smokers, weight | Cravings: 50%<br>Stress or mood swings: 44%<br>Being around others who smoke: 42%<br>Not receiving any support during quit attempt: 26%<br>Fear of weight gain: 20%<br>No specific treatments (pharmacological) could help them quit smoking: 31.6% |



| Author, Year, Country                | Study aims                                                            | Setting                                                   | Sample                                                                                                            | Response rate | Type of survey (cross-sectional, etc) | Outcome measure (and info on survey instrument)                                                                                          | Barriers to quitting (type and prevalence)                                                                                                                                                                                                                                                                                                                                                        |
|--------------------------------------|-----------------------------------------------------------------------|-----------------------------------------------------------|-------------------------------------------------------------------------------------------------------------------|---------------|---------------------------------------|------------------------------------------------------------------------------------------------------------------------------------------|---------------------------------------------------------------------------------------------------------------------------------------------------------------------------------------------------------------------------------------------------------------------------------------------------------------------------------------------------------------------------------------------------|
|                                      |                                                                       |                                                           | housing, 31% in shelter; street 20%; 3% living with family/friends.                                               |               |                                       | gain, habit, stress/mood), social support.                                                                                               |                                                                                                                                                                                                                                                                                                                                                                                                   |
| <b>Prisoner groups</b>               |                                                                       |                                                           |                                                                                                                   |               |                                       |                                                                                                                                          |                                                                                                                                                                                                                                                                                                                                                                                                   |
| Dickens et al 2005 (102).<br><br>UK. | To explore psychiatric inpatients views of smoking cessation options. | Forensic wards of large independent psychiatric hospital. | n = 34<br>57.8% male<br>Age: mean = 36.0, SD = 9.7<br>Ethnicity: not reported.<br>88.9% legal status of detained. | 44.1%         | Cross-sectional.                      | Demographic details, mental health act status, smoking characteristics, views on smoking cessation and rules on smoking in the hospital. | Other patients smoking: 79.4%<br>The “smoky atmosphere” would make it too difficult to stop smoking: 58.8%<br>Seeing members of staff smoking: 55.9%<br>Not enough encouragement from staff: 29.4%<br>Not enough information about giving up smoking: 26.5%<br>“It’s just too difficult” to give up smoking: 73.5%<br>Several smokers commented that boredom was a factor in continuing to smoke. |

1  
2  
3  
4  
5  
6  
7  
8  
9  
10  
11  
12  
13  
14  
15  
16  
17  
18  
19  
20  
21  
22  
23  
24  
25  
26  
27  
28  
29  
30  
31  
32  
33  
34  
35  
36  
37  
38  
39  
40  
41  
42  
43  
44  
45  
46  
47

Supplementary file 3. Summaries of the included qualitative studies by disadvantaged group (n = 52).

| Author, Year, Country               | Study aims                                                                                       | Setting                                                         | Sample                                                                                                                            | Method        | Interview schedule/discussion guide                                                                                                                                                        | Type of analysis           | Barriers to quitting                                                                                                                                                                                                                                                                                                                                                                                                                                                                                                                                                          |
|-------------------------------------|--------------------------------------------------------------------------------------------------|-----------------------------------------------------------------|-----------------------------------------------------------------------------------------------------------------------------------|---------------|--------------------------------------------------------------------------------------------------------------------------------------------------------------------------------------------|----------------------------|-------------------------------------------------------------------------------------------------------------------------------------------------------------------------------------------------------------------------------------------------------------------------------------------------------------------------------------------------------------------------------------------------------------------------------------------------------------------------------------------------------------------------------------------------------------------------------|
| <b>Low income</b>                   |                                                                                                  |                                                                 |                                                                                                                                   |               |                                                                                                                                                                                            |                            |                                                                                                                                                                                                                                                                                                                                                                                                                                                                                                                                                                               |
| Ahijevych 2003(42).<br><br>USA      | Investigate the beliefs and attitudes towards tobacco of current and former Appalachian smokers. | Non metropolitan Appalachian county.                            | n = 14<br>64% female<br>Age: mean = 33.7, SD = 8.7<br>Ethnicity: 100% white, non-Hispanic<br>High school education or less: 40.5% | Focus groups  | Roles of tobacco in life and community, factors helped or hindered previous quit attempts, community perceptions of tobacco use, and strategies for successful smoking cessation programs. | Content analysis.          | Addiction to nicotine.<br>Cravings.<br>Smoking provides a rush.<br>Alleviating boredom<br>Peers and family members who reinforced smoking.<br>Routine/ritual of smoking.<br>Social activities.<br>Associated behaviours: alcohol, caffeine, Weight gain.                                                                                                                                                                                                                                                                                                                      |
| Bancroft et al 2003 (43).<br><br>UK | Investigate barriers to quitting and accessing treatment in two disadvantaged areas of Scotland  | two disadvantaged geographical areas in Scotland                | n = 100<br>50% female<br>Age: not reported<br>Ethnicity: not reported.<br>Housing tenure: 76% council housing                     | Interviews    | Smoking and quitting; future smoking, intentions to quit; habit and addiction.                                                                                                             | Thematic analysis. NUDIST. | Addictive behaviour.<br>Habit.<br>Lack of alternatives.<br>Smoking is the only pleasurable activity to do.<br>Reward.<br>Deal with stress.<br>Alleviate boredom.<br>Alleviate stress from financial pressures.                                                                                                                                                                                                                                                                                                                                                                |
| Beech et al 2003 (44).<br><br>USA   | Investigate the cultural and social factors associated with African American low income smokers. | High schools, colleges, housing developments and trade schools. | n = 118<br>45% female<br>Age: between 18 and 35 years old.<br>Ethnicity: 100% African American.                                   | Focus groups. | Smoking initiation, smoking maintenance and cessation.                                                                                                                                     | Content analysis.          | Equal numbers of participants reporting smoking managed their stress compared to those who reported smoking contributed to their stress.<br>Anxiety management.<br>Daily hassles and life events..<br>Energy and alertness.<br>Taking a break.<br>Boredom.<br>Managing certain medical conditions.<br>High levels of accessibility in communities.<br>Willpower and prayer were more highly valued as cessation methods than use of pharmacology or counselling.<br>High prevalence of smoking within social networks and communities: family, peers and the wider community. |

| Author, Year, Country               | Study aims                                                                                                                                                                                                             | Setting                                                                     | Sample                                                            | Method             | Interview schedule/discussion guide                                                                                                                        | Type of analysis                       | Barriers to quitting                                                                                                                                                                                                                                                                                                                                                                                                                                                                                                                                                                                                                                                                                                                                         |
|-------------------------------------|------------------------------------------------------------------------------------------------------------------------------------------------------------------------------------------------------------------------|-----------------------------------------------------------------------------|-------------------------------------------------------------------|--------------------|------------------------------------------------------------------------------------------------------------------------------------------------------------|----------------------------------------|--------------------------------------------------------------------------------------------------------------------------------------------------------------------------------------------------------------------------------------------------------------------------------------------------------------------------------------------------------------------------------------------------------------------------------------------------------------------------------------------------------------------------------------------------------------------------------------------------------------------------------------------------------------------------------------------------------------------------------------------------------------|
| Bryant et al 2010 (45).<br><br>AUS  | Sought to describe the smoking behaviours and attitudes of disadvantaged Australian smokers attending SCSOs, including past experiences of quitting, preferences for quit support, and perceived barriers to quitting. | Five community welfare organisations located in New South Wales, Australia. | n = 32<br>69% female<br>Age: all participants aged over 16 years. | Focus groups.      | Current smoking behaviour, motivation to quit, past quit attempts, barriers to quitting and preferences for cessation support.                             | Thematic analysis.<br>Nvivo version 8. | Stress relief.<br>Calming, relaxing.<br>Alleviating boredom.<br>Coping mechanism .<br>A best friend.<br>Low self-efficacy – doubting ability to quit.<br>Viewing quitting as impossible.<br>Feeling ready and having willpower were integral to success.<br>Low knowledge of quit support.<br>Unsure how to correctly use NRT, belief NRT was ineffective, learning from others about the efficacy of NRT.<br>Knowledge of other pharmacotherapies was low.<br>Telephone quit lines usage also low.<br>Weight gain<br>Limited perceived support from GPs and other health professionals.<br>High cost of NRT.<br>Repeated social and environmental exposure to smoking.<br>Norm within the community.<br>High prevalence of friends and family were smokers. |
| Copeland et al 2003 (46).<br><br>UK | To further examine the roles that smoking plays in the lives of the study group                                                                                                                                        | General practice in a deprived area of Edinburgh.                           | n = 51<br>100% female                                             | Open ended survey. | Open-ended questions regarding smoking characteristics, feelings and experiences regarding smoking, as well as measures of anxiety, depression and stress. | Content and category analysis.         | Lack of willpower.<br>Triggering event such as starting new job, marital problems, bereavement.<br>Nothing else to help cope.<br>Weight gain.<br>Social smoking.<br>Contact with other smokers.                                                                                                                                                                                                                                                                                                                                                                                                                                                                                                                                                              |
| Dunn et al 1998 (47)                | Explore attitudes and perceptions of smoking during pregnancy.                                                                                                                                                         | Neighbourhood centres and clinics in an urban area. .                       | n = 57.<br>100% female<br>Age: 77% aged 25 or younger             | Focus groups.      | Health concerns, sources of advice regarding pregnancy.                                                                                                    | Content analysis.                      | Internal factors:<br>Stress.<br>Boredom.<br>Addiction to nicotine.                                                                                                                                                                                                                                                                                                                                                                                                                                                                                                                                                                                                                                                                                           |

1  
2  
3  
4  
5  
6  
7  
8  
9  
10  
11  
12  
13  
14  
15  
16  
17  
18  
19  
20  
21  
22  
23  
24  
25  
26  
27  
28  
29  
30  
31  
32  
33  
34  
35  
36  
37  
38  
39  
40  
41  
42  
43  
44  
45  
46  
47

| Author, Year, Country              | Study aims                                                                                                      | Setting                                      | Sample                                                                                                                                                                                                    | Method        | Interview schedule/discussion guide                                                                                               | Type of analysis      | Barriers to quitting                                                                                                                                                                                                                                                                                                                                                                                                                                                                                                                                                                                                         |
|------------------------------------|-----------------------------------------------------------------------------------------------------------------|----------------------------------------------|-----------------------------------------------------------------------------------------------------------------------------------------------------------------------------------------------------------|---------------|-----------------------------------------------------------------------------------------------------------------------------------|-----------------------|------------------------------------------------------------------------------------------------------------------------------------------------------------------------------------------------------------------------------------------------------------------------------------------------------------------------------------------------------------------------------------------------------------------------------------------------------------------------------------------------------------------------------------------------------------------------------------------------------------------------------|
| USA                                | barriers to quitting, second hand smoke exposure, and preference for cessation programs among women of low SES. |                                              | Ethnicity: African Americans 24; Native Americans 23; white 10. High school education or less: 68%                                                                                                        |               | characteristics of useful programs, health effects of smoking, quitting, passive smoking exposure and attempts to avoid exposure. |                       | Withdrawal symptoms.<br>Strong cravings.<br>Weight gain.<br>Belief that smoking was not dangerous enough to warrant quitting.<br>Long term effects which participants do not consider.<br>External factors:<br>Being around friends and family members who smoked, including those who were not supportive of quit attempt.<br>Lack of control over exposure to smoke and influence of others.                                                                                                                                                                                                                               |
| Franco et al 2011 (48).<br><br>AUS | Increase knowledge on the barriers to smoking cessation and the acceptability of addressing smoking in SCSOs    | SCSO Illawarra region, NSW Australia         | n = 53<br>83% female                                                                                                                                                                                      | Focus groups. | Smoking and health, smoking cessation, support preferences, acceptability of addressing smoking in SCSO setting.                  | Notes based analysis. | Ritual.<br>Structures the day.<br>Reward after daily chores.<br>Something to do.<br>Stress management.<br>Concerns about the effectiveness of NRT.<br>Cost of NRT and other treatments too high.<br>Need more support to quit.                                                                                                                                                                                                                                                                                                                                                                                               |
| Lacey et al 1993 (87).<br><br>USA. | Increase understanding of the role of smoking and the challenges faced when attempting to quit.                 | Residents of public housing in Chicago, USA. | n = 6 – 8 participants per focus group (8 focus groups in total).<br>100% female.<br>Ethnicity: 100% African American.<br>42% not completed high school<br>100% had average yearly income < \$13,000 USD. | Focus groups. | Day to day activities, life stressors, community and living conditions,                                                           | Content analysis.     | Social isolation.<br>Lack of support.<br>Racially and economically segregated areas.<br>Fear limited outings to necessary activities.<br>Limited social networks outside of immediate family.<br>Stress management.<br>Substandard, unclean housing.<br>Few opportunities for recreation or employment.<br>Violence and crime.<br>Substance use.<br>Sense of control.<br>One of few attainable pleasures.<br>Legal and harmless for relatively small investment.<br>Perceived alternatives are drugs, alcohol abuse or losing control.<br>Low perceived harm.<br>Fatalistic beliefs/rationalisations/self-exempting beliefs. |

| Author, Year, Country               | Study aims                                                                                                                                                                                                                   | Setting                                                                              | Sample                                                                                                                                                                        | Method                      | Interview schedule/discussion guide                                    | Type of analysis                                           | Barriers to quitting                                                                                                                                                                                                                                                                                                                                                                                                                                                                                                                                     |
|-------------------------------------|------------------------------------------------------------------------------------------------------------------------------------------------------------------------------------------------------------------------------|--------------------------------------------------------------------------------------|-------------------------------------------------------------------------------------------------------------------------------------------------------------------------------|-----------------------------|------------------------------------------------------------------------|------------------------------------------------------------|----------------------------------------------------------------------------------------------------------------------------------------------------------------------------------------------------------------------------------------------------------------------------------------------------------------------------------------------------------------------------------------------------------------------------------------------------------------------------------------------------------------------------------------------------------|
|                                     |                                                                                                                                                                                                                              |                                                                                      |                                                                                                                                                                               |                             |                                                                        |                                                            | Other physical illness and disease that took priority – COPD, heart disease, kidney disease.<br>Belief that smoking is normal.<br>Belief that most adults smoke.<br>High prevalence in social network.<br>Hard to avoid smoking.<br>Belief that the only way to quit smoking was to do it cold turkey.<br>Low knowledge regarding how to quit and methods/help available.<br>Absence of specific constructive assistance.<br>Being self-reliant preferred over being dependent on help from someone.<br>Smoking cessation support not seen as effective. |
| Moffatt et al 2004 (50).<br><br>AUS | Aim to gain better understanding of the barriers to quitting in blue collar workers                                                                                                                                          | Two antenatal clinics in Brisbane, QLD servicing predominantly low SES participants. | n = 25<br>100% male<br>Age: between 20 and 53 years old                                                                                                                       | Semi-structured interviews. | Questions developed from literature review and pilot study.            | Constant comparative method – conceptual analysis. NUDIST. | Lack of control over smoking.<br>Long positive association with cigarettes – cool, sophisticated.<br>Lack of support to quit.<br>Withdrawal - negative feelings such as anger/irritability.<br>Peer pressure.<br>Relaxation.<br>Social contexts.<br>Habit – daily routine.                                                                                                                                                                                                                                                                               |
| Nichter et al 2007 (51).<br><br>USA | To uncover the factors that facilitate smoking during pregnancy and those that facilitate quitting; investigate the use of harm reduction practices used by pregnant women and the effects of social networks on smoking and | Large urban city.                                                                    | n = 53<br>100% female<br>Age: mean = 25, ranged from 18 – 43 years.<br>Ethnicity:<br>Anglo-American 62%;<br>Mexican American 21%;<br>African American 11%,<br>multiethnic 6%. | Semi-structured interviews  | Interview questions developed from pilot material with key informants. | ATLAS ti 5.0                                               | Low social support<br>Living in more than one residence during pregnancy<br>Not being head of household/able to make decisions regarding smoking policy and house.<br>No stable employment<br>No family/peer support<br>Smoking helped women manage anger, frustration, control and autonomy.<br>Coping strategy<br>History of depression<br>Smoking seen as lesser evil compared to alcohol or other drugs<br>Less clear about direct outcomes for baby<br>Rationalisations “defence mechanisms/downplaying                                             |

| Author, Year, Country                     | Study aims                                                                                                                              | Setting                                                                  | Sample                                                | Method                              | Interview schedule/discussion guide                                                                               | Type of analysis                        | Barriers to quitting                                                                                                                                                                                                                                                                                                                                                                                                                                                          |
|-------------------------------------------|-----------------------------------------------------------------------------------------------------------------------------------------|--------------------------------------------------------------------------|-------------------------------------------------------|-------------------------------------|-------------------------------------------------------------------------------------------------------------------|-----------------------------------------|-------------------------------------------------------------------------------------------------------------------------------------------------------------------------------------------------------------------------------------------------------------------------------------------------------------------------------------------------------------------------------------------------------------------------------------------------------------------------------|
|                                           | cessation.                                                                                                                              |                                                                          | High school education or less: 74%<br>Unemployed: 60% |                                     |                                                                                                                   |                                         | medical risks/prioritising less stress over smoking damage.<br>No helpful guidance from health professionals                                                                                                                                                                                                                                                                                                                                                                  |
| Paul et al 2010 (52).<br><br>AUS          | Examine the experience of the social context of smoking and whether this experience differed by sociodemographic characteristics        | Local community facilities in high and low SEIFA suburbs in Sydney, Aus. | n = 4 – 8 participants per group (8 groups in total). | Focus groups.                       | Smoking behaviour and history; current and future smoking environments; environmental factors related to smoking. | Thematic analysis.                      | Nostalgia for smoking that was once cool and sophisticated.<br>Weight control.<br>Not noticing any decrease in the smoking prevalence in their community over time.<br>Social/peer groups predominantly made up of smokers.<br>Social activity.<br>High perceived acceptability of smoking.<br>Work environment being more conducive to smoking.<br>Lack of smoking restriction at workplace.<br>Acceptability of smoking in open air environments in low SEP neighbourhoods. |
| Peretti-Watel et al 2009 (53).<br><br>FRA | To increase understanding of low socioeconomic status and smoking through investigating smoking motives.                                | South –east of France – social work centres and participants homes.      | n = 31                                                | In depth semi-structured interviews | Brief topic guide mentioned but not presented.                                                                    | Based on principles of grounded theory. | Addiction.<br>Pleasure and happiness.<br>Satisfied essential needs.<br>Relieves stress.<br>Fills void in everyday life – nothing else to do.<br>Only leisure activity they can afford.<br>Combat loneliness.<br>Manage other addictions.<br>Stressful life events such as break up of relationship or loss of job.                                                                                                                                                            |
| Roddy et al 2006 (55).<br><br>UK          | Determine level of awareness of stop smoking services in deprived area and identify specific barriers and motivators to improve access. | Most deprived districts in Greater Nottingham.                           | n = 39                                                | Focus groups.                       | Smoking behaviour, cessation experiences, knowledge and perceptions of existing services.                         | NUD*IST 6 software.                     | Lack of knowledge of services<br>Misconceptions about attitudes within services.<br>Being judged by health professionals.<br>Feeling they would need intensive support to quit.<br>NRT was expensive and ineffective (many contraindications).<br>Bupropion was negatively associated with adverse events reported in media.<br>Stress.<br>Rationalisations.<br>Failed quit attempts in the past.                                                                             |

| Author, Year, Country               | Study aims                                                                                             | Setting                                                                                                    | Sample                                                                 | Method                     | Interview schedule/discussion guide                                                                                                         | Type of analysis   | Barriers to quitting                                                                                                                                                                                                                                                                                                                                                                                                                                                                                                                                                                                                                                                                                                                                                                                                                                                                                                                                                                                                                                                                                                                                                                                                                                                                    |
|-------------------------------------|--------------------------------------------------------------------------------------------------------|------------------------------------------------------------------------------------------------------------|------------------------------------------------------------------------|----------------------------|---------------------------------------------------------------------------------------------------------------------------------------------|--------------------|-----------------------------------------------------------------------------------------------------------------------------------------------------------------------------------------------------------------------------------------------------------------------------------------------------------------------------------------------------------------------------------------------------------------------------------------------------------------------------------------------------------------------------------------------------------------------------------------------------------------------------------------------------------------------------------------------------------------------------------------------------------------------------------------------------------------------------------------------------------------------------------------------------------------------------------------------------------------------------------------------------------------------------------------------------------------------------------------------------------------------------------------------------------------------------------------------------------------------------------------------------------------------------------------|
| Stead et al 2001 (56).<br><br>UK    | To investigate how smoking is fostered in areas that experience multiple forms of deprivation          | Housing estates within 8 communities in Glasgow having DEPCAT scores of 7 (highest scores of deprivation). | n = 53<br>Sample selected according to age, gender and smoking status. | Focus groups               | Smoking characteristics, smoking history, leisure activities, work and unemployment, cessation history, experiences of the local community. | Thematic analysis. | <p>Coping mechanism – dealing with stress directly related to living in a deprived community.</p> <p>Stressors include: limited income, caring for children, poor local infrastructure, high levels of crime and drug use, limited opportunities for rest and respite from community.</p> <p>High accessibility of cigarettes (legal, illegal and informal sources).</p> <p>Socialising.</p> <p>Main pleasure (cheap and easily accessible).</p> <p>Smoking alleviated anxiety and nervousness.</p> <p>Coping with frustration and demotivation of widespread unemployment.</p> <p>Normative influence of being surrounded by smoking.</p> <p>Accepted smoking as inevitable and preferable to other drug use.</p> <p>Deprived communities experienced feeling cut off from other communities (that were more advantaged) thus weren't exposed to other norms.</p> <p>Belonging and identity.</p> <p>Smoking compensates exclusion and binds communities together.</p> <p>Deepening financial hardship.</p> <p>Fears of not being able to cope without cigarettes.</p> <p>Limited awareness of help available.</p> <p>Lack of trust regarding efficacy of medications and cynicism about health professionals financially exploiting smokers.</p> <p>Little support from community.</p> |
| Stewart et al 1996 (57).<br><br>CAN | Examine the factors associated with barriers and supports to smoking cessation in disadvantaged women. | Atlantic region, Canada.                                                                                   | n = 386<br>100% female                                                 | Semi-structured interviews | Interview guides were used but not described.                                                                                               | Content analysis.  | <p>Linked with poverty, isolation, and caregiving.</p> <p>Coping mechanism.</p> <p>Associated fear, anger and anxiety.</p> <p>Reward.</p> <p>Pleasure.</p> <p>Addiction.</p> <p>Short and long term goals – struggle for 'survival'; therefore long term benefits of quitting had little impact.</p>                                                                                                                                                                                                                                                                                                                                                                                                                                                                                                                                                                                                                                                                                                                                                                                                                                                                                                                                                                                    |

| Author, Year, Country                   | Study aims                                                                                         | Setting                                                                                    | Sample                                                                       | Method                      | Interview schedule/discussion guide                                                                                                                                                                                | Type of analysis             | Barriers to quitting                                                                                                                                                                                                                                                                                                                                                                                                                                                                                                                                                                      |
|-----------------------------------------|----------------------------------------------------------------------------------------------------|--------------------------------------------------------------------------------------------|------------------------------------------------------------------------------|-----------------------------|--------------------------------------------------------------------------------------------------------------------------------------------------------------------------------------------------------------------|------------------------------|-------------------------------------------------------------------------------------------------------------------------------------------------------------------------------------------------------------------------------------------------------------------------------------------------------------------------------------------------------------------------------------------------------------------------------------------------------------------------------------------------------------------------------------------------------------------------------------------|
|                                         |                                                                                                    |                                                                                            |                                                                              |                             |                                                                                                                                                                                                                    |                              | Not using traditional cessation support services – negative reactions from those that had.<br>Personal determination and willpower were integral to success.<br>Cessation aids viewed as ineffective or harmful.<br>Believed that poverty, abuse and alcoholism more damaging to society – antagonistic towards tobacco control measures.                                                                                                                                                                                                                                                 |
| Stewart et al 1996 (58).<br><br>CAN     | Identify social-psychological factors associated with smoking cessation among disadvantaged women. | Atlantic region of Canada<br><br>Research carried out in sites accessible to participants. | n = 126<br>100% female                                                       | Focus groups and interviews | Reasons for smoking and continuing to smoke, impact of anti-smoking media messages, opinions and experiences regarding smoking cessation, strategies, services and support that would help stop or reduce smoking. | Content analysis.            | Weight gain.<br>Low expectation of support from health professionals and health agencies – lack of confidence in GPs and nurses.<br>Rarely contacted national/peak bodies like Lung association or Cancer Society.<br>Geographical isolation, lack of awareness of role and scepticism.<br>Lack of social support – partners, immediate family, friends and acquaintances.                                                                                                                                                                                                                |
| Stewart et al 2011 (59).<br><br>Canada. | Identify the needs and preference of female smokers from low socioeconomic background ds.          | Three large urban cities in Canada.                                                        | n = 64<br>100%female<br>Age: mean = 37<br>High school education or less: 68% | Focus groups.               | Smoking characteristics, cessation attempts and experiences, preferences for support to quit and resources.                                                                                                        | Thematic analysis.<br>QSR N6 | Limited employment opportunities.<br>Reliance on welfare and benefit payments.<br>Low socioeconomic status – poverty, low education, unemployment and the stress caused by these factors.<br>Lack of affordable childcare.<br>Management of emotions and stress – anger, upset, anxiety.<br>Coping mechanism.<br>One of few pleasures available.<br>Relaxation.<br>Reward.<br>Boredom, lack of access to recreational activities.<br>Smoking linked to feelings of loneliness and hopelessness regarding poverty.<br>Smoking as habit – linked to other behaviours – drinking coffee etc. |
| Stillman et                             | Increase knowledge of                                                                              | Employment and training and                                                                | n = 28                                                                       | Focus groups                | Social norms and smoking, how                                                                                                                                                                                      | Atlas.ti v 3.                | Smoking seen as normal, very common and not problematic.                                                                                                                                                                                                                                                                                                                                                                                                                                                                                                                                  |



| Author, Year, Country     | Study aims                                                                                                   | Setting                                                                                                                                                                | Sample                                                        | Method                                             | Interview schedule/discussion guide                                                                                                                   | Type of analysis    | Barriers to quitting                                                                                                                                                                                                                                                                                                                                                                                                                                                                                                                                                                                                                                                                                                                                                                                                                                                                                                                                                                                                                                     |
|---------------------------|--------------------------------------------------------------------------------------------------------------|------------------------------------------------------------------------------------------------------------------------------------------------------------------------|---------------------------------------------------------------|----------------------------------------------------|-------------------------------------------------------------------------------------------------------------------------------------------------------|---------------------|----------------------------------------------------------------------------------------------------------------------------------------------------------------------------------------------------------------------------------------------------------------------------------------------------------------------------------------------------------------------------------------------------------------------------------------------------------------------------------------------------------------------------------------------------------------------------------------------------------------------------------------------------------------------------------------------------------------------------------------------------------------------------------------------------------------------------------------------------------------------------------------------------------------------------------------------------------------------------------------------------------------------------------------------------------|
| al 2007 (60).<br>USA.     | environmental factors that facilitate or prevent young AA from smoking cessation.                            | education programs – inner city.                                                                                                                                       |                                                               |                                                    | tobacco was sourced, socialisation and smoking and smoking restrictions and advertising.                                                              |                     | Faced few restrictions regarding smoking. “Loosies” (single cigarettes) were easily accessible.                                                                                                                                                                                                                                                                                                                                                                                                                                                                                                                                                                                                                                                                                                                                                                                                                                                                                                                                                          |
| Tod 2003 (61).<br>UK      | Explore the reasons why pregnant women do not quit and are less likely to access smoking cessation services. | South Yorkshire Coalfields (SYC) – deprived area with high prevalence of smoking. Pregnant women known to maternity services within this area. Approached by midwives. | n = 11<br>100% female<br>Age: ranged from 19 to 38 years old. | Semi-structured interviews via telephone.          | Smoking history; obstetric history; factors influencing access to smoking cessation services; knowledge and beliefs; preferences for future services. | Framework analysis. | Addiction.<br>Only cutting down for baby; plan to resume after birth.<br>Enjoyment.<br>Belief that willpower is essential for success.<br>Cutting down but missing that extra strength to finally quit.<br>Pressures and stresses of life.<br>Lack of willpower linked to self-fulfilling prophecy; relapse was viewed as inevitable.<br>Smoking during pregnancy safest, and healthiest, and preferred course of action.<br>Housework; childcare, financial anxieties and relationships.<br>Protecting mental health.<br>Familiar and necessary tool to cope.<br>Smoking controlling appetite for weight concerns and also to control hunger.<br>Food was sacrificed in order to afford cigarettes.<br>Partners’ smoking affected motivation to quit.<br>Being around people who were smoking.<br>Timing of smoking cessation advice coinciding with tests for babies’ health .<br>Judgemental attitudes from service providers.<br>Lack of childcare options.<br>Minimizing risk of smoking.<br>Participants own experience discredited health advice. |
| Tsourtos et al 2008 (62). | Understand the barriers to quitting smoking, especially in relation to stress, in order to                   | The most disadvantaged are (local government area) in metropolitan Adelaide.                                                                                           | n = 29<br>48% female.                                         | Focus groups (2) and in depth telephone interviews | Barriers to quitting smoking (focus on stress), reasons for quitting, stress and quit attempts.                                                       | Not reported.       | Stressful environments including: financial stress, child rearing, family issues, employment disadvantage, increased morbidity and mortality within community (including smoking related illness), and difficulties in the workplace.<br>NRT too expensive to maintain.                                                                                                                                                                                                                                                                                                                                                                                                                                                                                                                                                                                                                                                                                                                                                                                  |

| Author, Year, Country                | Study aims                                                                                                     | Setting                                                                       | Sample                                                                                                       | Method                      | Interview schedule/discussion guide                                                                                                                          | Type of analysis                  | Barriers to quitting                                                                                                                                                                                                                                                                                                                                                                                                                                                                                 |
|--------------------------------------|----------------------------------------------------------------------------------------------------------------|-------------------------------------------------------------------------------|--------------------------------------------------------------------------------------------------------------|-----------------------------|--------------------------------------------------------------------------------------------------------------------------------------------------------------|-----------------------------------|------------------------------------------------------------------------------------------------------------------------------------------------------------------------------------------------------------------------------------------------------------------------------------------------------------------------------------------------------------------------------------------------------------------------------------------------------------------------------------------------------|
| AUS                                  | understand the differences in cessation rates between the groups.                                              |                                                                               |                                                                                                              | (11).                       |                                                                                                                                                              |                                   | Financial stress.<br>Stress that arises from childrearing and women having a smoke to get 'time out'.<br>Partner smoking.<br>Increased morbidity and mortality in community, including due to smoking related illness.<br>Habit of smoking; ritualised behaviour.<br>Lack of control.<br>Addiction.<br>Cravings.<br>Boredom.<br>Smoking to alleviate stress.<br>Some respondents held the belief that it was not tobacco/cigarettes themselves that provided stress relief, but the chance to relax. |
| White & Baird 2013 (65)<br><br>UK    | Explore perspectives of former miners in disadvantaged former coal mining communities on smoking and cessation | Former coal mining towns and villages in Bolsover district, North Derbyshire. | n = 16<br><br>100% white<br>100% male<br>100% British<br><br>Aged between 45 and 68<br><br>All former miners | Interviews                  | Perspectives on smoking, stopping smoking and stop smoking services.                                                                                         | Content analysis                  | Attributing health issues to coal dust exposure rather than smoking<br>Comparing the risks of coal mining to the risks of smoking<br>Participants reported being able to stop smoking at will with minimal difficulty and need for support, despite all previous attempts being unsuccessful.                                                                                                                                                                                                        |
| Wiltshire et al 2003 (63).<br><br>UK | Examine participants' views on quitting smoking and smoking and how that may be affected by their lives.       | Two health centres in two areas of deprivation in Scotland.                   | n = 100<br>50% male<br>Housing: 76% council/housing association                                              | Semi-structured interviews. | Daily consumption patterns, reasons for smoking, wider community environment, experiences of quitting and changes in smoking status, future quit intentions. | Thematic analysis.<br><br>NUD*ST. | Stress Management.<br>Coping mechanism.<br>Living, socializing and working with other smokers.<br>Smoking 'deeply embedded' in their lives.<br>Smoking was normalized and routine contact with other smokers made quitting even more difficult.<br>Only way to quit is remove yourself completely from your environment.<br>Addiction to nicotine.<br>Cravings.<br>Withdrawal symptoms and their impact on family/friends.                                                                           |

| Author, Year, Country               | Study aims                                                                                                                                                  | Setting                                                  | Sample                                                                                                                                | Method        | Interview schedule/discussion guide                                                                                                 | Type of analysis   | Barriers to quitting                                                                                                                                                                                                                                                                                                                                                                                                                                                                                                                                                                                           |
|-------------------------------------|-------------------------------------------------------------------------------------------------------------------------------------------------------------|----------------------------------------------------------|---------------------------------------------------------------------------------------------------------------------------------------|---------------|-------------------------------------------------------------------------------------------------------------------------------------|--------------------|----------------------------------------------------------------------------------------------------------------------------------------------------------------------------------------------------------------------------------------------------------------------------------------------------------------------------------------------------------------------------------------------------------------------------------------------------------------------------------------------------------------------------------------------------------------------------------------------------------------|
|                                     |                                                                                                                                                             |                                                          |                                                                                                                                       |               |                                                                                                                                     |                    | <p>Stressful life circumstances.</p> <p>Belief that NRT not up to task of replacing cigarettes.</p> <p>Cost of NRT.</p> <p>Word of mouth regarding bad/unsuccessful attempts with NRT.</p> <p>Boredom and times of inactivity.</p> <p>Characteristics of living in a disadvantaged area - violence, crime.</p> <p>Willpower was essential in order to be able to quit smoking.</p>                                                                                                                                                                                                                             |
| <b>Indigenous studies</b>           |                                                                                                                                                             |                                                          |                                                                                                                                       |               |                                                                                                                                     |                    |                                                                                                                                                                                                                                                                                                                                                                                                                                                                                                                                                                                                                |
| Burgess et al 2007 (66).<br><br>USA | Explore the cultural factors associated with experience and perceptions regarding tobacco use, cessation and dependence treatments.                         | Minneapolis/St Paul metropolitan area.                   | n = 26<br>American Indian participants<br>30% female                                                                                  | Focus groups. | Smoking, smoking cessation and tobacco dependence treatments.                                                                       | Content analysis.  | <p>Smoking as highly acceptable and widespread within community.</p> <p>Traditional ceremonial use of tobacco.</p> <p>Addiction.</p> <p>Cravings.</p> <p>Withdrawal symptoms.</p> <p>Stressful circumstances.</p> <p>Suspicion towards pharmacotherapy.</p> <p>Scepticism about benefits of pharmacotherapy and negative views of medical profession in general.</p> <p>For women, smoking was seen as way to care for self in face of multiple responsibilities</p> <p>Women used to manage stress, negative emotions, deal with life demands including children, work and family.</p> <p>Weight control.</p> |
| Choi et al 2006 (67).<br><br>USA.   | Assess smoking behaviour, cessation, traditional tobacco use and attitudes towards a smoking cessation program in a sample of American Indian participants. | Health Centre based within an Indian Nations University. | n = 41<br>American Indian participants<br>63% female<br>Age: mean = 41 (SD = 12.3)<br>ranged from 21-67<br>63% some college education | Focus groups. | 1. Tobacco use (including ceremonial and non-ceremonial)<br>2. Smoking and quitting.<br>3. Smoking cessation program "Second Wind". | Themes identified. | <p>Traditional or ceremonial use of tobacco.</p> <p>Use of tobacco important to maintain an 'Indian' identity.</p> <p>Relapse in social situations.</p> <p>Normative behaviour.</p> <p>Highly prevalent: everyone smokes.</p> <p>Stressful situations.</p> <p>Belief that quitting smoking "takes personal motivation and a person will not be able to quit unless he or she has determination and self-control and really wants to quit".</p> <p>Most had tried NRT – cost was a barrier to getting more</p>                                                                                                  |

1  
2  
3  
4  
5  
6  
7  
8  
9  
10  
11  
12  
13  
14  
15  
16  
17  
18  
19  
20  
21  
22  
23  
24  
25  
26  
27  
28  
29  
30  
31  
32  
33  
34  
35  
36  
37  
38  
39  
40  
41  
42  
43  
44  
45  
46  
47

| Author, Year, Country                       | Study aims                                                                           | Setting                                                | Sample                                                              | Method                                              | Interview schedule/discussion guide                                             | Type of analysis                               | Barriers to quitting                                                                                                                                                                                                                                                                                                                                                                                                                                                                                                                                                                                                                                                                                                                                                                                                                                                                                                                                                                                                                                                                                                                                                                                                                                                                                                                                                                                                                                                                                                                                                                                                                                      |
|---------------------------------------------|--------------------------------------------------------------------------------------|--------------------------------------------------------|---------------------------------------------------------------------|-----------------------------------------------------|---------------------------------------------------------------------------------|------------------------------------------------|-----------------------------------------------------------------------------------------------------------------------------------------------------------------------------------------------------------------------------------------------------------------------------------------------------------------------------------------------------------------------------------------------------------------------------------------------------------------------------------------------------------------------------------------------------------------------------------------------------------------------------------------------------------------------------------------------------------------------------------------------------------------------------------------------------------------------------------------------------------------------------------------------------------------------------------------------------------------------------------------------------------------------------------------------------------------------------------------------------------------------------------------------------------------------------------------------------------------------------------------------------------------------------------------------------------------------------------------------------------------------------------------------------------------------------------------------------------------------------------------------------------------------------------------------------------------------------------------------------------------------------------------------------------|
|                                             |                                                                                      |                                                        |                                                                     |                                                     |                                                                                 |                                                | <p>NRT.<br/>Nightmares were attributed to bupropion and NRT.<br/>Largest barriers to NRT use were cost and accessibility.</p>                                                                                                                                                                                                                                                                                                                                                                                                                                                                                                                                                                                                                                                                                                                                                                                                                                                                                                                                                                                                                                                                                                                                                                                                                                                                                                                                                                                                                                                                                                                             |
| <p>Dawson et al 2012 (68).<br/><br/>AUS</p> | <p>Increase understanding of barriers within Aboriginal Health Worker workforce.</p> | <p>Metropolitan, rural and remote health services.</p> | <p>n = 34<br/>Aboriginal Australian participants<br/>44% female</p> | <p>Semi structured interviews and focus groups.</p> | <p>Factors related to relapse, not wanting to quit, challenges in quitting.</p> | <p>Content analysis.<br/>NVivo 8 software.</p> | <p>Stress, grief and loss – due to health concerns, excessive work demands, family issues, inequity in workplace, institutionalised racism and pervasiveness of social disadvantage. Chronic disease, burden of illness, premature deaths in community.<br/>Fear – of failure, feeling sick (withdrawal symptoms), weight gain, and losing a coping strategy.<br/>Smoking not being a problem – rationalizations as well as just the belief that it’s not a problem.<br/>Quitting not the greatest priority in their lives.<br/>Lack of knowledge about quit methods – unsure about the benefits of certain pharmacological methods.<br/>Lack of access to relevant quit smoking aids – culturally appropriate, cost.<br/>Nicotine addiction – biological addiction was rarely referenced.<br/>Social pressure to smoke – living and socialising with smokers.<br/>Situations where alcohol was consumed or with high number of other smokers.<br/>Quitting means exclusion from this network.<br/>Offence at not participating – maintaining connectedness.<br/>Lack of support/role models – few friends and family/community members who had quit successfully, intolerance of mood changes around when quitting.<br/>Pressure to quit from non-smokers – ‘picked on’, line between encouragement and beleaguering.<br/>Smoking common in the workplace – acceptable, organisational culture enabled smoking, create bond between clients and workers, challenge in enforcing smoke free policies.<br/>Smoking was pervasive and acceptable within community, inability to avoid smoking – high prevalence impacted by historical role of tobacco,</p> |

| Author, Year, Country              | Study aims                                                                                                                | Setting                                         | Sample                                                   | Method                     | Interview schedule/discussion guide                                                                                                    | Type of analysis           | Barriers to quitting                                                                                                                                                                                                                                                                                                                                                                                                                                                                                                                                                                                                                                                                                                                                                                                                                                                                                                                                                                                                                                                                                                                                                                                                                                                                                                                  |
|------------------------------------|---------------------------------------------------------------------------------------------------------------------------|-------------------------------------------------|----------------------------------------------------------|----------------------------|----------------------------------------------------------------------------------------------------------------------------------------|----------------------------|---------------------------------------------------------------------------------------------------------------------------------------------------------------------------------------------------------------------------------------------------------------------------------------------------------------------------------------------------------------------------------------------------------------------------------------------------------------------------------------------------------------------------------------------------------------------------------------------------------------------------------------------------------------------------------------------------------------------------------------------------------------------------------------------------------------------------------------------------------------------------------------------------------------------------------------------------------------------------------------------------------------------------------------------------------------------------------------------------------------------------------------------------------------------------------------------------------------------------------------------------------------------------------------------------------------------------------------|
|                                    |                                                                                                                           |                                                 |                                                          |                            |                                                                                                                                        |                            | culturally and colonial influence. smoking behaviours weren't questioned.<br>Lack of policies to promote smoke free environments, short term funding of tobacco programs, inadequate investment for organisations.                                                                                                                                                                                                                                                                                                                                                                                                                                                                                                                                                                                                                                                                                                                                                                                                                                                                                                                                                                                                                                                                                                                    |
| Dawson et al 2012 (69).<br><br>AUS | Explore the perceptions of Aboriginal Health Workers in relation to individual and contextual factors relating to smoking | Metropolitan, rural and remote health services. | n = 34<br>Aboriginal Australian participants<br>44% male | Semi-structured interviews | Current smoking and smoking history; reasons for continuing to smoke; typical weekday and weekend when smoking occurred; quit history. | Content analysis. NVivo 8. | Stress: relationships and family issues; financial problems; community issues and work challenges.<br>Poor physical and mental health e.g. anxiety, depression, chronic pain.<br>Associative behaviours: getting in the car; drinking alcohol or caffeinated drinks, watching television, going outside.<br>Habit (tactile) – having something in their hands.<br>Boredom – ‘time on one’s hand’.<br>Awareness of ‘nicotine addiction’ only reported by 2 participants.<br>Chronic disease burden – heart disease, emphysema, diabetes, cancer.<br>Grief and loss – reduced life expectancy.<br>Caring for family – health support and advice; financial obligations and housing.<br>Breakdown in family dynamics: single parent families; isolation; stolen generation.<br>Socialisation and connection: social lubricant; belonging.<br>Debriefing opportunity – after stressor.<br>Co-worker, friend, family, client encouragement to smoke. Active and passive encouragement.<br>Demanding work, including out of hours.<br>Job insecurity and financial insecurity. Institutionalised racism.<br>Dispossession of land; collective grief and loss; prevalent racism; social disadvantage; poverty, homelessness; unemployment, chronic disease, drug abuse; gambling, violence, housing issues; imprisonment, lack of education. |
| Dennis et al                       | Qualitatively explore tobacco,                                                                                            | Rural reservation in Midwestern                 | n = 49<br>American                                       | Focus groups.              | Not reported.                                                                                                                          | Thematic analysis.         | Lenient attitudes towards smoking.<br>Generational use (parents and grandparents to children).                                                                                                                                                                                                                                                                                                                                                                                                                                                                                                                                                                                                                                                                                                                                                                                                                                                                                                                                                                                                                                                                                                                                                                                                                                        |

| Author, Year, Country                         | Study aims                                                                                                                                              | Setting                                           | Sample                                                                 | Method                                                   | Interview schedule/discussion guide                                                                                                                           | Type of analysis                                                                         | Barriers to quitting                                                                                                                                                                                                                                                                                                                                                                                                                                                                                                                                                                                                                                                                                                                                                                                                                                                                                                                                                                            |
|-----------------------------------------------|---------------------------------------------------------------------------------------------------------------------------------------------------------|---------------------------------------------------|------------------------------------------------------------------------|----------------------------------------------------------|---------------------------------------------------------------------------------------------------------------------------------------------------------------|------------------------------------------------------------------------------------------|-------------------------------------------------------------------------------------------------------------------------------------------------------------------------------------------------------------------------------------------------------------------------------------------------------------------------------------------------------------------------------------------------------------------------------------------------------------------------------------------------------------------------------------------------------------------------------------------------------------------------------------------------------------------------------------------------------------------------------------------------------------------------------------------------------------------------------------------------------------------------------------------------------------------------------------------------------------------------------------------------|
| 2012 (70).<br><br>USA                         | alcohol and other drug use in a sample of American Indians living on a rural reservation.                                                               | state of USA.                                     | Indian participants<br>61% female<br>Age: 18 – 54<br>(57.2%)           |                                                          |                                                                                                                                                               |                                                                                          | Accessibility of cigarettes (easy access through friends and family; cheaper to purchase on reservation).<br>Smoking linked with other behaviours (gambling, alcohol use).<br>High prevalence of smoking in community.                                                                                                                                                                                                                                                                                                                                                                                                                                                                                                                                                                                                                                                                                                                                                                          |
| Fernandez et al 2008 (71).<br><br>New Zealand | Investigate the perception of smoking cessation in Maori women                                                                                          | One local Maori organisation                      | n = 5 Maori participants<br>100% female                                | Focus group.                                             | Perceptions of smoking and quitting, triggers for smoking, quit smoking policies and initiatives from the government, and mass media campaigns and marketing. | Thematic analysis.                                                                       | Observing health professionals smoking.<br>Limited support from other smokers (feeling negatively judged by other smokers when trying to quit).<br>Maori women felt more comfortable accessing health care from a Maori provider rather than a mainstream service.<br>All participants stated they would never ring the National Quitline (trust, disclosing information and allowing someone to assist them who is not known were the reasons cited for this).<br>Asking a stranger for help deemed unacceptable.                                                                                                                                                                                                                                                                                                                                                                                                                                                                              |
| Fu et al 2007 (72).<br><br>USA                | Increase understanding of the experiences of smoking cessation in 4 different ethnic groups: American Indians, Hmong, Vietnamese and African Americans. | 7 community organizations in Minneapolis/St Paul. | n = 26 American Indian participants (6 focus groups).<br>44.4% female. | Focus groups conducted separately for each ethnic group. | Discussion guide: smoking, smoking cessation, and help with quitting.                                                                                         | Methods for analysing qualitative data. Atlas.ti, version 5.0 was used in coding themes. | Counselling was associated with an unequal power relationship between a white counsellor who was going to shame the participants about their smoking behaviour.<br>Rationalisations: “it's not like I'm dying today”.<br>Cynicism about the medical profession, including beliefs that doctors are untrustworthy, driven by monetary gain, and hypocritical.<br>Negative experiences with particular doctors including doctors being confrontational, blaming and impersonal.<br>Most had low levels of knowledge about the functional benefits of pharmacotherapy.<br>Participants did not understand that pharmacotherapy could be used to help them with cravings and withdrawal symptoms.<br>Concerns about side effects (e.g., overestimation of risks of side effects compared to risks of smoking).<br>Cost of medications and lack of accessibility perceived as major barriers to their use.<br>Word of mouth was a powerful influence on decisions to use or not use pharmacotherapy. |

| Author, Year, Country                  | Study aims                                                                                | Setting                                                                   | Sample                                                                                                                    | Method         | Interview schedule/discussion guide                                                                                      | Type of analysis                            | Barriers to quitting                                                                                                                                                                                                                                                                                                                                                                                                                                                                                                                                                                                                                                                                                                                                                                                                                                                                                                                                                                                                                         |
|----------------------------------------|-------------------------------------------------------------------------------------------|---------------------------------------------------------------------------|---------------------------------------------------------------------------------------------------------------------------|----------------|--------------------------------------------------------------------------------------------------------------------------|---------------------------------------------|----------------------------------------------------------------------------------------------------------------------------------------------------------------------------------------------------------------------------------------------------------------------------------------------------------------------------------------------------------------------------------------------------------------------------------------------------------------------------------------------------------------------------------------------------------------------------------------------------------------------------------------------------------------------------------------------------------------------------------------------------------------------------------------------------------------------------------------------------------------------------------------------------------------------------------------------------------------------------------------------------------------------------------------------|
|                                        |                                                                                           |                                                                           |                                                                                                                           |                |                                                                                                                          |                                             | American Indian smokers, in particular, associated pills with Western medicine, and viewed them with scepticism.                                                                                                                                                                                                                                                                                                                                                                                                                                                                                                                                                                                                                                                                                                                                                                                                                                                                                                                             |
| Gould et al, 2013<br><br>AUS           | Explore issues for pregnant ATSI women in terms of smoking and smoking in the household   | Regional NSW, Australia<br>Aboriginal maternal and infant health service. | 18 Aboriginal and/or Torres Strait Islander peoples (83% female)<br>Mean age: 30.3 (SD = 11.70)<br>Age range: 17-53 years | 5 focus groups | Experiences of and attitudes towards smoking during pregnancy and cessation                                              | Content analysis                            | Smoking usual in families<br>Several smokers in one household, difficult to avoid being around smoke<br>Smoking provides sense of social connection<br>Isolation if attempting to quit<br>Shared activity, and an anticipated part of mutual exchange (socialising)<br>Low levels of support from family and friends to quit<br>Pressure to quit from family and friends<br>Pregnancy specific barriers: offset diabetes or keep baby small<br>Babies and individuals turned out “healthy”<br>Not receiving understanding from doctors (judgemental)<br>Stress and anxious situations<br>Cravings and withdrawal symptoms<br>Meal times and work breaks (habit)<br>Yarning and socialising<br>Sporting events, watching TV, boredom, TV ads, drinking alcohol and smelling tobacco smoke<br>Smoking cannabis<br>Being around other smokers, after birth,<br>Quitting “too hard”<br>Negative views of NRT due to adverse effects, preference to quit unaided, didn’t understand how NRT could help.<br>Hopelessness after trying many methods |
| Gryczynski et al 2010 (75).<br><br>USA | Inform the development of a culturally appropriate smoking cessation program for American | Local community-based American Indian health service organization         | n = 35 American Indian participants.<br>51.4% female<br>Age: 45.7% between ages                                           | Focus groups.  | Cultural and social factors associated with smoking; smoking cessation experiences; attitudes towards cessation aids and | Variant of the thematic framework approach. | Values of self-reliance and pride that are intertwined with American Indian identity.<br>Enjoyment of smoking.<br>Addiction to nicotine (deeply entrenched learned behaviour).<br>Linked to very heavy smoking behaviours (waking up during the night to smoke).                                                                                                                                                                                                                                                                                                                                                                                                                                                                                                                                                                                                                                                                                                                                                                             |

| Author, Year, Country            | Study aims                                                                             | Setting                                                  | Sample                                                  | Method                      | Interview schedule/discussion guide                                                            | Type of analysis                                   | Barriers to quitting                                                                                                                                                                                                                                                                                                                                                                                                                                                                                                                                                                                                                                                                                                                                                                                                                                                                              |
|----------------------------------|----------------------------------------------------------------------------------------|----------------------------------------------------------|---------------------------------------------------------|-----------------------------|------------------------------------------------------------------------------------------------|----------------------------------------------------|---------------------------------------------------------------------------------------------------------------------------------------------------------------------------------------------------------------------------------------------------------------------------------------------------------------------------------------------------------------------------------------------------------------------------------------------------------------------------------------------------------------------------------------------------------------------------------------------------------------------------------------------------------------------------------------------------------------------------------------------------------------------------------------------------------------------------------------------------------------------------------------------------|
|                                  | Indians by looking at their preference for smoking cessation and associated programs.  |                                                          | of 41 – 50.                                             |                             | programs.                                                                                      |                                                    | Association between other behaviours and smoking (coffee, alcohol, sex, other drug use).<br>Smoking as a form of stress relief (given the highly stressful nature of low socioeconomic status).<br>Ubiquity of cigarette use in life, friends and family.<br>While physicians were seen as a good source of smoking cessation help, it was noted that many AI do not have private health insurance. Also physicians were not seen for non-emergency care.<br>Cost, incorrect use, ineffectiveness and negative side effects prevented use of NRT.<br>High number of family friends also smokers.                                                                                                                                                                                                                                                                                                  |
| Hodge et al 2006 (76).<br>USA.   | Investigate tobacco use, attitudes, knowledge and practices in American Indian sample. | Reservation sites.                                       | n = 51<br>American Indian participants<br>56.9% female. | Focus groups.               | History of tobacco use in tribal context, knowledge and attitudes regarding cigarette smoking. | Krueger's (1998) focus group analysis methodology. | Lenient attitudes towards smoking including: acceptance of smoking as a social norm; belief in autonomy and people's right to experiment with tobacco; and low numbers of household smoking bans. Cultural phenomenon of independence and non-interference.<br>Reluctance to tell others what to do, or to move away from someone who begins to smoke.<br>Low harm value assigned to smoking – in light of other day to day issues faced.<br>Participants were aware of the risks but downplayed the seriousness of those risks.<br>Enjoyment of smoking.<br>Maintaining the ritual of smoking.<br>Brand loyalty (several brands of tobacco that have AI names e.g. Seneca, Mohawk etc)<br>Ceremonial use of tobacco was an important cultural custom.<br>Learning how to use tobacco in ceremonies as a young person was important.<br>The loyalty to the tribe overrides tobacco's ill effects. |
| Johnston et al 2008 (77).<br>AUS | To gain a better understanding of the reasons why Indigenous Australians               | Health professional and community members from a coastal | n = 25<br>Indigenous Australian community members       | Semi-structured interviews. | Flexible interview schedule developed through literature review and discussions with           | Thematic analysis. Atlas-ti (Version 5).           | Social pressure to smoke – both implicit and explicit. Smoking is everywhere – smokers live or socialise with smokers.<br>Tobacco as a normative substance in this community.<br>Communal and collective activity.                                                                                                                                                                                                                                                                                                                                                                                                                                                                                                                                                                                                                                                                                |



| Author, Year, Country               | Study aims                                                                                                                                                             | Setting                          | Sample                                                                           | Method        | Interview schedule/discussion guide                                                                                                                                                                        | Type of analysis   | Barriers to quitting                                                                                                                                                                                                                                                                                                                                                                                                                                                                                                                                                                                                                                                                                                                                                                                                                                                                                                                                                                                                                                                                                                                                                                                             |
|-------------------------------------|------------------------------------------------------------------------------------------------------------------------------------------------------------------------|----------------------------------|----------------------------------------------------------------------------------|---------------|------------------------------------------------------------------------------------------------------------------------------------------------------------------------------------------------------------|--------------------|------------------------------------------------------------------------------------------------------------------------------------------------------------------------------------------------------------------------------------------------------------------------------------------------------------------------------------------------------------------------------------------------------------------------------------------------------------------------------------------------------------------------------------------------------------------------------------------------------------------------------------------------------------------------------------------------------------------------------------------------------------------------------------------------------------------------------------------------------------------------------------------------------------------------------------------------------------------------------------------------------------------------------------------------------------------------------------------------------------------------------------------------------------------------------------------------------------------|
|                                     | smoke.                                                                                                                                                                 | community in Northern Territory. | 52% female                                                                       |               | service providers – details not given.                                                                                                                                                                     |                    | <p>Tobacco used for reciprocal social exchange; ceremony and sharing.</p> <p>Sharing was a very important part of Indigenous culture as a way to influence behaviour, relationships and social control.</p> <p>Refusing to share cigarettes may be seen as a betrayal of the kinship they share and as an offensive act.</p> <p>Not sharing cigarettes may lead to isolation, as the sharing of cigarettes contributes to a sense of belonging and social identity.</p> <p>Some participants were derided for their decision to quit (but others were supported).</p> <p>Some state that the only way they could quit smoking is to distance themselves from family and friends, an entirely unfeasible proposition.</p> <p>Sharing a cigarette gives opportunity for a ‘yarn’ – enjoyment.</p> <p>Other positive effects including feeling more alert, happy, good, more able to complete tasks, relief, and allowing a sense of control.</p> <p>Habit, addiction and hooked – nicotine dependence.</p> <p>Overcrowding in homes.</p> <p>Stress was most often mentioned in conjunction with smoking relapse, and more often by women than men.</p> <p>An outlet, a stress management, and to manage grief.</p> |
| Kaholokula et al, 2007 (78).<br>USA | Identify supports for and barriers to smoking cessation for this ethnic population., and to inform the development of a smoking cessation program for this population. | Northern rural community.        | n = 52 Native Hawaiian participants.<br>48% male<br>Age: mean = 51.8 (SD = 12.4) | Focus groups. | Smoking cessation advice and experience; barriers and facilitators to cessation; preferences in smoking cessation programs; differences between males and females.<br><br>Ex-smokers were also asked about | Thematic analysis. | <p>Social factors:<br/>presence of friends, family and co-workers who were smokers, nagging to quit smoking.</p> <p>Psychological factors:<br/>stress, negative emotions, lack of ‘willpower’, thinking about the need to smoke.</p> <p>Physical factors:<br/>physical experience on nicotine addiction and withdrawal, weight gain.</p> <p>Behavioural :<br/>habitual nature of smoking, smoking linked to other behaviours (alcohol, reading the paper).</p>                                                                                                                                                                                                                                                                                                                                                                                                                                                                                                                                                                                                                                                                                                                                                   |

1  
2  
3  
4  
5  
6  
7  
8  
9  
10  
11  
12  
13  
14  
15  
16  
17  
18  
19  
20  
21  
22  
23  
24  
25  
26  
27  
28  
29  
30  
31  
32  
33  
34  
35  
36  
37  
38  
39  
40  
41  
42  
43  
44  
45  
46  
47

| Author, Year, Country               | Study aims                                                                                                           | Setting                                                                                        | Sample                                                                                                                                                                           | Method                                            | Interview schedule/discussion guide                                                                          | Type of analysis  | Barriers to quitting                                                                                                                                                                                                                                                                                                                                                                                                                                                                                                                                                                                                                                                                                                                                                                                                                                                                                                                                                                                                                                                                                                                                                                                                                                                                                           |
|-------------------------------------|----------------------------------------------------------------------------------------------------------------------|------------------------------------------------------------------------------------------------|----------------------------------------------------------------------------------------------------------------------------------------------------------------------------------|---------------------------------------------------|--------------------------------------------------------------------------------------------------------------|-------------------|----------------------------------------------------------------------------------------------------------------------------------------------------------------------------------------------------------------------------------------------------------------------------------------------------------------------------------------------------------------------------------------------------------------------------------------------------------------------------------------------------------------------------------------------------------------------------------------------------------------------------------------------------------------------------------------------------------------------------------------------------------------------------------------------------------------------------------------------------------------------------------------------------------------------------------------------------------------------------------------------------------------------------------------------------------------------------------------------------------------------------------------------------------------------------------------------------------------------------------------------------------------------------------------------------------------|
|                                     |                                                                                                                      |                                                                                                |                                                                                                                                                                                  |                                                   | aids to quitting and preferences.                                                                            |                   |                                                                                                                                                                                                                                                                                                                                                                                                                                                                                                                                                                                                                                                                                                                                                                                                                                                                                                                                                                                                                                                                                                                                                                                                                                                                                                                |
| Passey et al 2011 (79).<br><br>AUS  | Explore the factors contributing to smoking initiation and the social context within which smoking behaviour occurs. | Coastal, river region of NSW – Aboriginal Maternal and Infant Health Strategy antenatal teams. | n = 36 Aboriginal Australian participants. 100% female<br>Age (of women interview n = 22): mean = 24.9, ranged from 17 to 41.<br>Education: Less than ten years of education 68% | 3 Focus groups and 22 semi-structured interviews. | Topic areas – social and environmental factors that maintained or encouraged smoking and smoking initiation. | Content analysis. | Colonisation and introduction of tobacco:<br>Disruption to Aboriginal society including dispossession of traditional lands, removal of children, loss of traditional lifestyle and introduction of new substances.<br>The traditional and ceremonial limits that used to apply to smoking are no longer applicable.<br>Social networks and community norms:<br>Aboriginal community remains largely isolated.<br>Many aboriginal people have limited interaction with non-smokers.<br>High prevalence of smoking which allows the normalisation of smoking to occur.<br>Limited interaction with non-smokers also limits exposure to changing attitude towards smoking.<br>Disadvantaged lives:<br>High unemployment, associated poverty, affordable housing, overcrowding, relationship difficulties, loss of family members through death/removal of children, grief and loss, abuse, perceived racism and negative stereotypes –smoking helped manage and navigate their way through these factors.<br>Maintaining relationships and sharing:<br>Relationships may be given higher priority over individual needs.<br>Reciprocity – obligations to share time and resources including cigarettes – to give and to accept those given to you.<br>Sharing and having a yarn was an important social activity. |
| Patten et al, 2009 (80).<br><br>USA | Preferences and acceptability of different tobacco cessation strategies and the barriers and                         | 3 remote villages on the coast of western Alaska (populations ranging from 750                 | n = 49 Alaskan Native participants<br>61% female<br>Age: mean = 14.6 (SD =                                                                                                       | Focus groups.                                     | Motives for quitting, barriers to quitting, role of family members and others in quitting, preference for    | Content analysis. | Cravings.<br>Use as a stress/anger management.<br>Use of traditional forms of tobacco.<br>Manages mood.<br>Relieves boredom.<br>High prevalence and acceptance of tobacco use in                                                                                                                                                                                                                                                                                                                                                                                                                                                                                                                                                                                                                                                                                                                                                                                                                                                                                                                                                                                                                                                                                                                               |

| Author, Year, Country              | Study aims                                                                                                                                           | Setting                                                  | Sample                                                                                                                           | Method                                | Interview schedule/discussion guide                                                                                                | Type of analysis                        | Barriers to quitting                                                                                                                                                                                                                                                                                                                                                                                                                                                                                                 |
|------------------------------------|------------------------------------------------------------------------------------------------------------------------------------------------------|----------------------------------------------------------|----------------------------------------------------------------------------------------------------------------------------------|---------------------------------------|------------------------------------------------------------------------------------------------------------------------------------|-----------------------------------------|----------------------------------------------------------------------------------------------------------------------------------------------------------------------------------------------------------------------------------------------------------------------------------------------------------------------------------------------------------------------------------------------------------------------------------------------------------------------------------------------------------------------|
|                                    | unmet needs of Alaskan Native adolescents who want to quit smoking.                                                                                  | to 1,000)<br>Most residents live subsistence lifestyles. | 1.6).                                                                                                                            |                                       | tobacco cessation methods, preference for study recruitment and retention methods.                                                 |                                         | villages<br>Lack of encouragement by peers and other community members to stop.<br>Lack of effective resources to help quit                                                                                                                                                                                                                                                                                                                                                                                          |
| Wood et al 2008 (81).<br><br>AUS   | The aim of this study was to explore the experience of tobacco smoking and cessation within a pregnant Aboriginal and Torres Strait Islander sample. | Perth (State capital), Western Australia.                | n = 40<br>Aboriginal women and 10<br>Aboriginal Health Workers<br>Age: ranged from 14 to 50 years, with most less than 30 years. | Focus groups and in-depth interviews. | A semi-structured discussion guide with open-ended questions was developed in consultation with the reference group.               | Thematic analysis.<br>QSR N6<br>NUDIST. | Smoking as an accepted behaviour,<br>Stress management<br>Low priority in terms of health<br>Stress<br>Difficult life circumstances<br>Relaxation, chance to catch up with others.<br>Pregnancy acted as a barrier as it increased boredom/stress<br>High levels of smoking amongst friends, family and wider community.<br>To quit you would have to avoid family and friends.<br>Knowledge about the specific risks to the foetus was low.<br>References to babies being healthy despite smoking during pregnancy. |
| <b>Mental illness</b>              |                                                                                                                                                      |                                                          |                                                                                                                                  |                                       |                                                                                                                                    |                                         |                                                                                                                                                                                                                                                                                                                                                                                                                                                                                                                      |
| Clancy et al, 2013 (96)<br><br>AUS | Explore experiences of smokers with self-reported depression                                                                                         | Large cluster randomized control study                   | n = 16                                                                                                                           | Interviews                            | Semi-structured interview<br>Attitude towards smoking, relationship between smoking and mental health, quitting process.           | Thematic analysis<br><br>nVivo 9        | Low mood<br>Sense of hopelessness<br>Lack of control over one's life<br>Lack of meaningful activities                                                                                                                                                                                                                                                                                                                                                                                                                |
| Davis et al 2010 (83).<br><br>USA  | Investigate how people with severe mental illness perceive risks from smoking/risks posed by smoking.                                                | Large urban psychosocial rehabilitation agency.          | n = 31<br>54% female<br>Ethnicity:<br>54.8%<br>Caucasian;<br>35% African American                                                | Semi-structured interviews.           | General health and healthy lifestyle questions, smoking status, smoking history, quit attempts and barriers to and facilitators of | Inductive data analysis.<br>Atlas-ti.   | Enjoyment of smoking – pleasurable activity/coping mechanism.<br>Maintain good mental health.<br>Stress management.<br>Worried that without stress management of smoking: relapse, rehospitalisation, suicidal thoughts or suicide were possible.<br>Allowed people to manage other addictions.                                                                                                                                                                                                                      |

| Author, Year, Country             | Study aims                                                                                                       | Setting                                             | Sample                                                                                                                                                 | Method                      | Interview schedule/discussion guide                                                                                                  | Type of analysis                | Barriers to quitting                                                                                                                                                                                                                                                                                                                                                                                                                                                                                                                                                                                                                                                                                                                    |
|-----------------------------------|------------------------------------------------------------------------------------------------------------------|-----------------------------------------------------|--------------------------------------------------------------------------------------------------------------------------------------------------------|-----------------------------|--------------------------------------------------------------------------------------------------------------------------------------|---------------------------------|-----------------------------------------------------------------------------------------------------------------------------------------------------------------------------------------------------------------------------------------------------------------------------------------------------------------------------------------------------------------------------------------------------------------------------------------------------------------------------------------------------------------------------------------------------------------------------------------------------------------------------------------------------------------------------------------------------------------------------------------|
|                                   |                                                                                                                  |                                                     |                                                                                                                                                        |                             | cessation.                                                                                                                           |                                 | <p>Not experiencing symptoms of smoking related illness currently.</p> <p>Smoking certain brands, types or flavours of cigarettes because they are less likely to cause cancer.</p> <p>Extreme trauma and negative life experiences act as a protective factor for smoking related illness – “I’ve made it through life this far, I don’t think I’ll get sick from smoking too” belief.</p> <p>Examples of friends and family who are/were smokers and have never been ill.</p> <p>Examples of friends/family who are not smokers who are still unhealthy.</p> <p>Friends and family socialising and smoking at the same time.</p>                                                                                                      |
| Howard et al 2012 (85).<br><br>UK | Investigate the specific barriers to smoking cessation faced by pregnant smokers.                                | Maternity and perinatal psychiatry services.        | n = 27<br>100% female<br>Age: mean = 29 (SD = 1.1), ranged from 17 – 41.<br>Ethnicity: 13 White; 4 Black African; 6 Black Caribbean and 4 Mixed/Other. | Semi-structured interviews. | Not reported.                                                                                                                        | Framework analysis.             | <p>Smoking used as a way of losing weight (for participants diagnosed with SMI and eating disorder).<br/>Maintain good mental health.<br/>Only occurring during manic/depressive cycles.<br/>Fear that attempts to quit would increase symptoms of mental illness.<br/>Prioritisation of mental health over smoking cessation by health professionals.<br/>Social environment – family, partner and social network of peers – high prevalence of smoking and lack of support.<br/>Accessibility of cigarettes.<br/>Psychological and physical addiction to cigarettes.<br/>Quit smoking services and resources: judgemental, lack of proactive follow up, lack of continuity of care, prioritisation of mental health over smoking.</p> |
| Kerr et al 2013 (86).<br><br>UK   | To determine the principle barriers and facilitators to smoking cessation for people with mental health problems | Recruited from three Health Boards in Scotland, UK. | n = 27 participants with mental health problems<br>41% male<br>Age: median = 49, ranged                                                                | Semi-structured interviews. | Smoking history; positive and negative aspects of smoking perceived barriers and facilitators to smoking cessation; times when smoke | Framework analysis.<br>NVivo 8. | <p>Socialising and habits of family and friends<br/>Smoking as a calming agent; dealing with general stressors and anxiety linked to mental health problems.<br/>Stopping smoking would mean loss of coping mechanism/support.<br/>Maintain good mental health.<br/>Deterioration in mental health increases need for smoking.</p>                                                                                                                                                                                                                                                                                                                                                                                                      |

| Author, Year, Country | Study aims                                                                                                                                                                                                                  | Setting                 | Sample                                                                                                                                                                                                        | Method                      | Interview schedule/discussion guide                                                                                                                                      | Type of analysis   | Barriers to quitting                                                                                                                                                                                                                                                                                                                                                                                                                                                                                                                                                                                                                                                                                                                                                                                                                                                                                                                                                           |
|-----------------------|-----------------------------------------------------------------------------------------------------------------------------------------------------------------------------------------------------------------------------|-------------------------|---------------------------------------------------------------------------------------------------------------------------------------------------------------------------------------------------------------|-----------------------------|--------------------------------------------------------------------------------------------------------------------------------------------------------------------------|--------------------|--------------------------------------------------------------------------------------------------------------------------------------------------------------------------------------------------------------------------------------------------------------------------------------------------------------------------------------------------------------------------------------------------------------------------------------------------------------------------------------------------------------------------------------------------------------------------------------------------------------------------------------------------------------------------------------------------------------------------------------------------------------------------------------------------------------------------------------------------------------------------------------------------------------------------------------------------------------------------------|
|                       |                                                                                                                                                                                                                             |                         | from 30 to 60. Diagnosis: 41% Schizophrenia/ delusional disorder; 30% Affective disorder; 22% Schizoaffective disorder; 4% neurotic disorder and 4% neurotic-affective disorder.                              |                             | more or less; impact of mental health problem on smoking and cessation                                                                                                   |                    | Stimulant effect helped overcome side effects from medications, in particular antipsychotics. Habit and addiction (small numbers). Enjoyment. Lacking motivation and confidence to give up. Lack of support from health professionals – uncommon to raise issue of smoking, offer encouragement support to stop. Some reports of professionals actively discouraging cessation attempts.                                                                                                                                                                                                                                                                                                                                                                                                                                                                                                                                                                                       |
| Lawn et al 2002 (87). | Describe the experience of mental health clients as they relate to smoking behaviour, the relationship of smoking behaviour to the course of their mental illness and its management and to their attempts to quit smoking. | Mental health services. | n = 24<br>50% female<br>Age: ranged from 25 – 63 years old.<br>Diagnosis: 6 chronic paranoid schizophrenia; 6 major depressive disorder; 6 bipolar affective disorder; and 6 borderline personality disorder. | Semi-structured interviews. | Cigarette use; quit history, use of NRT and other aids; meanings of smoking, attempts to quit, relationship between smoking and mental illness, experiences in hospital. | Thematic analysis. | Cigarettes as a symbol of control, fulfilling needs of: safety, reassurance, predictability, autonomy. Allowed greater freedom to take part in social activity. Promote more control – over symptoms, mood, and emotions. Cigarettes used by staff as tools to reward, punish or control behaviour. Smoking is the most effective means of avoiding relapse. Smoking as freedom, rebellion and protest. Little hope for recovery. An alternative way out to taking direct action – 'suicide'. Enjoyment. Compensation for losses in other areas of life. Smoking to relieve physical symptoms of mental illness – while many of their symptoms could be described as withdrawal/cravings from cigarette, most attributed these to symptoms of relapse to MI. Tools for decision making, clear thoughts, compartmentalise time, avoidance. Relieve stress, anxiety, to relax. Aid sleep, motivation, stabilise mood swings. Identity as a smoker – companionship of cigarettes. |

| Author, Year, Country             | Study aims                                                                                    | Setting                                                                        | Sample                                                                                     | Method        | Interview schedule/discussion guide                                                                                                                           | Type of analysis                      | Barriers to quitting                                                                                                                                                                                                                                                                                                                                                                                                                                                                                                                      |
|-----------------------------------|-----------------------------------------------------------------------------------------------|--------------------------------------------------------------------------------|--------------------------------------------------------------------------------------------|---------------|---------------------------------------------------------------------------------------------------------------------------------------------------------------|---------------------------------------|-------------------------------------------------------------------------------------------------------------------------------------------------------------------------------------------------------------------------------------------------------------------------------------------------------------------------------------------------------------------------------------------------------------------------------------------------------------------------------------------------------------------------------------------|
|                                   |                                                                                               |                                                                                |                                                                                            |               |                                                                                                                                                               |                                       | Families, friends, peers all smokers. Service providers and family condoning or colluding with their smoking. Few participants thought they could be successful. Few participants had tried NRT, citing cost as the main barrier. Excluded from mainstream quit programmes. Misunderstood and judged, double dose of stigma from smoking policy changes.                                                                                                                                                                                  |
| Lucksted et al 2000 (88).<br>USA. | Explore pros and cons of smoking and quitting smoking in psychosocial rehabilitation clients. | One urban and one suburban psychosocial rehabilitation groups.                 | n = 40<br>70% male<br>Demographic characteristics (including diagnosis) were not assessed. | Focus groups. | Semi-structured discussion guide: Positive and negative things about quitting, barriers and facilitators to quitting, other issues.                           | Thematic analysis.                    | The positive anti-depressive, anti-anxiety, calming, and cognitive-focusing effects of tobacco. Symptom management (symptoms of mental illness and also side effects from medications). Boredom. Enjoyment. Others beliefs – friends and family encouraging smoking as it was perceived to be one of few positive things in the individual's life. Ignoring health effects and health campaigns or accepting the risks. Lack of motivation. Smoking offered sense of identity and feeling included.                                       |
| Morris et al 2009 (89).<br>USA.   | To explore the perceptions of clients and staff on how best to quit smoking.                  | Consumers of mental health services in both rural and urban areas of Colorado. | n = 62                                                                                     | Focus groups. | Preferences for smoking cessation, views on current resources available, health professional practices that aid in cessation, factors that prevent cessation. | Content analysis. NVivo 7.            | Lack of resources to aid in cessation. Seeing health professionals smoking had a negative impact on participants' motivation to quit. Earning smoking as a behavioural reward. Negative expectations of the ability of people with a mental illness to quit smoking. Little knowledge of the negative health effects of cigarette smoking. Smoking to manage stress/anxiety/tension, psychiatric symptoms, and to enhance cognitive ability. Boredom. Smoking viewed as a social event, as a way of connecting with others. Peer smoking. |
| Nawaz et al 2012 (90).            | To explore the smoking and quitting beliefs,                                                  | Large psychiatric rehabilitation agency in                                     | n = 36<br>Ethnicity: 17 African                                                            | Focus groups. | Not reported.                                                                                                                                                 | Qualitative analysis. Atlas.ti.5.7.1. | Tobacco use promoted, normalized and reinforced in mental health treatment community. Smoking ameliorated illness symptoms and memories                                                                                                                                                                                                                                                                                                                                                                                                   |

| Author, Year, Country            | Study aims                                                                                                                                     | Setting                                                           | Sample                                                                                                                                                                             | Method        | Interview schedule/discussion guide                                                                                                                                                      | Type of analysis                               | Barriers to quitting                                                                                                                                                                                                                                                                                                                                                                                                                                                                                |
|----------------------------------|------------------------------------------------------------------------------------------------------------------------------------------------|-------------------------------------------------------------------|------------------------------------------------------------------------------------------------------------------------------------------------------------------------------------|---------------|------------------------------------------------------------------------------------------------------------------------------------------------------------------------------------------|------------------------------------------------|-----------------------------------------------------------------------------------------------------------------------------------------------------------------------------------------------------------------------------------------------------------------------------------------------------------------------------------------------------------------------------------------------------------------------------------------------------------------------------------------------------|
| USA                              | attitudes and behaviours amongst smokers with severe mental illness from three different race/ethnicity groups.                                | Chicago, Illinois.                                                | American; 12 Latino; 7 White.<br>Diagnosis: 14.3 – 33.3% Schizophrenia/Schizo-affective; 14.3 – 23.5% bipolar depression; 35.3 – 50% Major depression; 11.8 – 28.6% not specified. |               |                                                                                                                                                                                          |                                                | of traumatic experiences.<br>Manage daily stress that might otherwise aggravate mental illness symptoms.<br>Smoking norm amongst peers in treatment settings – highly prevalent.<br>Use of cigarettes to manage/reward behaviour.<br>Policies that prohibited smoking in only parts of treatment centres/halfway houses etc.<br>Difficulty of quitting<br>Lack of access to treatment – directly linked to poor health insurance and poverty.<br>Financial cost of NRT and other pharmacotherapies. |
| Prochaska et al 2013 (97)<br>USA | Aimed to obtain formative data to guide development of a tobacco cessation smoking program for youth with co-occurring mental health disorders | Outpatient mental health settings in the san Francisco bay area.  | Between ages of 16 – 23.<br>6 girls, 8 boys.                                                                                                                                       | interviews    | Semistructured interviews: reasons for smoking, perceived relationship between tobacco use and mental health issues, perceptions of smoking and preferences for program characteristics. | Content analysis<br>ATLAS.ti                   | Failure to enforce no smoking ban in the home<br>Parental smoking<br>Peers who smoke being a negative influence<br>Difficulty maintaining relationships if quit smoking<br>Stress<br>Affect<br>Other substances<br>Addiction<br>Media images                                                                                                                                                                                                                                                        |
| Snyder et al 2008 (91).<br>USA.  | Identify multi-level factors that impact on smoking                                                                                            | Two psychiatric rehabilitation centres within the mid-west of the | n = 25<br>75% male<br>Aged between 24 and 55.                                                                                                                                      | Focus groups. | Views and perspectives on smoking and cessation, factors                                                                                                                                 | Iterative analysis process.<br>QSR NUDI*ST N4. | Low confidence in quitting.<br>Desire to smoke was stronger than desire to quit.<br>NRT seen as ineffective leading to feelings of hopelessness.                                                                                                                                                                                                                                                                                                                                                    |

1  
2  
3  
4  
5  
6  
7  
8  
9  
10  
11  
12  
13  
14  
15  
16  
17  
18  
19  
20  
21  
22  
23  
24  
25  
26  
27  
28  
29  
30  
31  
32  
33  
34  
35  
36  
37  
38  
39  
40  
41  
42  
43  
44  
45  
46  
47

| Author, Year, Country                | Study aims                                                                              | Setting                                                                                                                      | Sample                                                                                                                                | Method        | Interview schedule/discussion guide                                     | Type of analysis                | Barriers to quitting                                                                                                                                                                                                                                                                                                                                                                                                                                                                                                                                                                                                                                                                                                                                                                                                                                                                                                                                 |
|--------------------------------------|-----------------------------------------------------------------------------------------|------------------------------------------------------------------------------------------------------------------------------|---------------------------------------------------------------------------------------------------------------------------------------|---------------|-------------------------------------------------------------------------|---------------------------------|------------------------------------------------------------------------------------------------------------------------------------------------------------------------------------------------------------------------------------------------------------------------------------------------------------------------------------------------------------------------------------------------------------------------------------------------------------------------------------------------------------------------------------------------------------------------------------------------------------------------------------------------------------------------------------------------------------------------------------------------------------------------------------------------------------------------------------------------------------------------------------------------------------------------------------------------------|
|                                      | cessation with people with mental illness.                                              | USA. One dual diagnosis, one offering rehabilitation services for predominantly African American people with mental illness. | Diagnoses not reported.                                                                                                               |               | that acted as motivators for smoking, factors that motivated cessation. |                                 | <p>Sense of autonomy over behaviour; participants felt that making the choice to smoke was empowering. Conversely, a sense of having no control over smoking due to addiction was also a barrier. Smoking as a central part of life. Coping mechanism for stress, anxiety, depression, boredom and loneliness. Cigarettes were an affordable luxury. Being able to purchase cigarettes was a source of self-esteem. Belief that if they quit, they would have nothing else enjoyable to do. Beliefs around the health effects of smoking: Participants reported health benefits from smoking and minimised health risks. Non-smokers are able to refrain from smoking because they are not disadvantaged. Belief that non-smokers don't have as much fun. Feeling judged or nagged by non-smokers. Smoking offering opportunity for connection and social interaction. Boredom; days left relatively unstructured so smoking filled in the time.</p> |
| Solway et al, 2011 (92).<br><br>USA. | Explore the perceptions of people with mental illness on smoking and smoking cessation. | Outpatient mental health services                                                                                            | n = 26<br>38% female<br>Mean age: 62 (ranged from 41 – 82).<br>Nearly all participants had been diagnosed with severe mental illness. | Focus groups. | Semi-structured interview protocol.                                     | Constructivist grounded theory. | <p>Perceived benefits of smoking outweigh the negative health risks.<br/>Enjoyment.<br/>Relaxation.<br/>Experience cravings when feeling anxious or upset or in the company of other smokers.<br/>Sense of control over emotions.<br/>Feeling extremely daunted about the quit process and withdrawal symptoms in general.<br/>Cost and accessibility of NRT.<br/>Lack of willpower, motivation and the right frame of mind.<br/>Smoking provides an identity and also acts as a source of connectedness over the sense of exclusion/stigma of having mental illness.</p>                                                                                                                                                                                                                                                                                                                                                                            |



| Author, Year, Country                 | Study aims                                                                                                     | Setting                                                | Sample                                                                                                                                                                       | Method                      | Interview schedule/discussion guide                                                                                                     | Type of analysis                                                               | Barriers to quitting                                                                                                                                                                                                                                                                                                                                                                                                                                                                                                                                                                                                                                                                                                              |
|---------------------------------------|----------------------------------------------------------------------------------------------------------------|--------------------------------------------------------|------------------------------------------------------------------------------------------------------------------------------------------------------------------------------|-----------------------------|-----------------------------------------------------------------------------------------------------------------------------------------|--------------------------------------------------------------------------------|-----------------------------------------------------------------------------------------------------------------------------------------------------------------------------------------------------------------------------------------------------------------------------------------------------------------------------------------------------------------------------------------------------------------------------------------------------------------------------------------------------------------------------------------------------------------------------------------------------------------------------------------------------------------------------------------------------------------------------------|
|                                       |                                                                                                                |                                                        |                                                                                                                                                                              |                             |                                                                                                                                         |                                                                                | Freedom, exercise their right to choose and maintain independence.<br>Smoking as a 'friend'.<br>Symptom management.<br>Continued smoking eliminates withdrawal symptoms.<br>Other's expectations of their ability to quit smoking.<br>Feeling that smoking and medications to treat mental illness are related. Smoking to relieve side effects of medication.<br>Weight gain.                                                                                                                                                                                                                                                                                                                                                    |
| Tsourtos et al 2008 (93).<br><br>AUS  | Explore why non-smokers appear to be resilient to smoking in a highly acceptable and prevalent group.          | General practice and a range of mental health services | n = 34<br>58% female<br>All had diagnoses of depression.                                                                                                                     | Semi-structured interviews. | Smoking and participants' social environment throughout the lifecourse.                                                                 | Components of Grounded Theory were used with an analytic framework.<br>NVivo 8 | Smoking to deal with stress:<br>Stressors included: boredom; physical injury; death of a loved one; stressful occupation; relationship breakdown; one or more medically diagnosed disorders.<br>Coping mechanism.<br>Relaxation.<br>Comfort.<br>Strength.<br>Quitting smoking would exacerbate stress.<br>Depression and anxiety made quitting more difficult.                                                                                                                                                                                                                                                                                                                                                                    |
| <b>Homeless</b>                       |                                                                                                                |                                                        |                                                                                                                                                                              |                             |                                                                                                                                         |                                                                                |                                                                                                                                                                                                                                                                                                                                                                                                                                                                                                                                                                                                                                                                                                                                   |
| Okuyemi et al 2006 (101).<br><br>USA. | Examine the views of homeless people on smoking practices, knowledge and barriers to and interest in quitting. | Homeless service facilities                            | n = 62<br>68% response rate<br>70% male<br>Ethnicity: 58% black; 37% white and 5% other.<br><br>Age: mean = 41.5 (SD = 9.3).<br>Education: 73% high school educated or lower | Focus groups.               | Smoking history; quitting experiences; smoking cessation aids (NRT and other medications); preferences for smoking cessation treatment. | Principles outlined by Morgan and Krueger.<br>Atlas-ti v 4.1 used for coding.  | Low self-efficacy<br>Limited access to care (cost of cessation aids).<br>Service providers offer limited support to quit.<br>Competing needs e.g. food, shelter.<br>Uncertainty associated with being homeless.<br>Limited structure and routine – keeping busy to avoid boredom.<br>Smoking as a socially acceptable behaviour in homeless settings.<br>Few restrictions in homeless services.<br>Fear that quitting smoking may result in changes in emotion/stress levels that may impact negatively on other areas of life.<br>Concerns about using NRT and cost, taste, proper usage and side effects, interactions with other medications and effect on other health conditions.<br>Concern about becoming addicted to NRT. |

| Author, Year, Country                  | Study aims                                                                                                                                                                      | Setting                                                                                  | Sample                                                                                                                                              | Method                  | Interview schedule/discussion guide                                                             | Type of analysis  | Barriers to quitting                                                                                                                                                                                                                                                                                                                                                                                                                                                                                                                                                            |
|----------------------------------------|---------------------------------------------------------------------------------------------------------------------------------------------------------------------------------|------------------------------------------------------------------------------------------|-----------------------------------------------------------------------------------------------------------------------------------------------------|-------------------------|-------------------------------------------------------------------------------------------------|-------------------|---------------------------------------------------------------------------------------------------------------------------------------------------------------------------------------------------------------------------------------------------------------------------------------------------------------------------------------------------------------------------------------------------------------------------------------------------------------------------------------------------------------------------------------------------------------------------------|
| <b>Prisoners</b>                       |                                                                                                                                                                                 |                                                                                          |                                                                                                                                                     |                         |                                                                                                 |                   |                                                                                                                                                                                                                                                                                                                                                                                                                                                                                                                                                                                 |
| Richmond et al 2009 (103).<br><br>AUS. | Investigate tobacco and its role in prisons.                                                                                                                                    | One maximum security prison and one community justice restorative centre.                | n = 40 (9 prisoners and 31 ex-prisoners).<br>30% female<br>Age: ranged from mid 20s to late 40s.<br>Ethnicity: 4 Aboriginal Australian participants | Focus groups.           | Role of tobacco in prisons, reasons for smoking initiation, smoking cessation, methods to quit. | Content analysis. | Poor knowledge of cessation strategies.<br>Some had not heard of bupropion, would not attend a doctor for assistance and would not attend quit smoking programs once in the community.<br>Smoking as a normal practice in prison.<br>Cigarettes as a substitute for money.<br>Boredom, stress, anxiety regarding legal matters, being locked up for large portions of the day and social isolation.<br>Cigarettes/smoking used as a reward.<br>Transfer to another wing or prison.<br>Bullying, missing family, isolation,                                                      |
| <b>At risk youth</b>                   |                                                                                                                                                                                 |                                                                                          |                                                                                                                                                     |                         |                                                                                                 |                   |                                                                                                                                                                                                                                                                                                                                                                                                                                                                                                                                                                                 |
| Lewis et al 2013(104)<br><br>UK        | Aims to contribute to the existing literature on smoking and young people and to clarify how factors related to young people and smoking play out in disadvantaged communities. | Communities in North East of England – deindustrialisation – former coal mining village. | n = 52<br><br>30 female<br><br>Aged between 1 to 18 years old                                                                                       | Participant observation | NA                                                                                              | Thematic analysis | Surrounded by other smokers makes it too hard to quit.<br>A lot of family and friends smoke<br>Helps with stress – conflicting messages – some participants felt it did and did not relieve stress.<br>For fun and enjoyment.<br>Accessibility and availability: tab (cigarette) houses – private dwellings where people can buy cigarettes – always sell to underage people.<br>Buying a packet from the tab houses and then selling at school.<br>Mixed messages regarding smoking: people in authority not discouraging or addressing smoking (e.g. teachers, police force). |

Supplementary file 4. Summaries of the included mixed methods studies by disadvantaged group (n = 3).

| Author, Year, Country     | Study aims                                                                                            | Setting       | Sample                                                                                        | Response rate | Type of survey (cross-sectional, etc)                                               | Outcome measure (and info on survey instrument)                                                                                                                                                                                      | Qualitative method and type of analysis                                          | Quantitative results (barrier and prevalence)                                                                                                                                                       | Qualitative data (barriers identified)                                                                                                                                                                                       |
|---------------------------|-------------------------------------------------------------------------------------------------------|---------------|-----------------------------------------------------------------------------------------------|---------------|-------------------------------------------------------------------------------------|--------------------------------------------------------------------------------------------------------------------------------------------------------------------------------------------------------------------------------------|----------------------------------------------------------------------------------|-----------------------------------------------------------------------------------------------------------------------------------------------------------------------------------------------------|------------------------------------------------------------------------------------------------------------------------------------------------------------------------------------------------------------------------------|
| <b>Indigenous studies</b> |                                                                                                       |               |                                                                                               |               |                                                                                     |                                                                                                                                                                                                                                      |                                                                                  |                                                                                                                                                                                                     |                                                                                                                                                                                                                              |
| Glover, 2005 (73).<br>NZ. | Increase the understanding of smoking in Maori populations and best ways to affect smoking cessation. | Not reported. | n = 130 self-identified Maori participants. 78% female. Age: mean = 35 (ranged from 16 – 62). | Not reported. | Pre and post interviews after a quit attempt (both open and close ended questions). | Smoking history, Smoking behaviour, Quit history, Fagerstrom NDT, Experience of relapse, Reasons for smoking, Motivation to quit, Self-efficacy, Stage of Change, Methods of quitting, Quit abstinence – not biochemically verified. | Semi-structured interviews General inductive approach. QSR NUD*IST Release V4.0. | Habit: 73%<br>Normal to smoke: 11.5%<br>Coping with stress: 48%<br>Coping with emotions: 23%<br>Addiction: 39%<br>Socialising/drinking: 34%<br>Bored: 29%<br>Enjoyment: 25%<br>Time out/reward: 17% | Relapse was also related to poor self-esteem and a tendency to attribute blame to themselves.<br>Living with other smokers.<br>Family (Whanau) directly or indirectly supporting relapse.<br>Socialising.<br>Others smoking. |

1  
2  
3  
4  
5  
6  
7  
8  
9  
10  
11  
12  
13  
14  
15  
16  
17  
18  
19  
20  
21  
22  
23  
24  
25  
26  
27  
28  
29  
30  
31  
32  
33  
34  
35  
36  
37  
38  
39  
40  
41  
42  
43  
44  
45  
46  
47

| Author, Year, Country                  | Study aims                                                                     | Setting                                                                        | Sample                                                                                                      | Response rate | Type of survey (cross-sectional, etc)  | Outcome measure (and info on survey instrument)                                                          | Qualitative method and type of analysis          | Quantitative results (barrier and prevalence)                                                                                                                                                                                                                               | Qualitative data (barriers identified)                                                                                                                                                                                                                                                                                                      |
|----------------------------------------|--------------------------------------------------------------------------------|--------------------------------------------------------------------------------|-------------------------------------------------------------------------------------------------------------|---------------|----------------------------------------|----------------------------------------------------------------------------------------------------------|--------------------------------------------------|-----------------------------------------------------------------------------------------------------------------------------------------------------------------------------------------------------------------------------------------------------------------------------|---------------------------------------------------------------------------------------------------------------------------------------------------------------------------------------------------------------------------------------------------------------------------------------------------------------------------------------------|
| <b>Mental illness studies</b>          |                                                                                |                                                                                |                                                                                                             |               |                                        |                                                                                                          |                                                  |                                                                                                                                                                                                                                                                             |                                                                                                                                                                                                                                                                                                                                             |
| Goldberg et al 1996 (84).<br><br>CAN   | Identify what clients identify as barriers and facilitators to cessation .     | Community based psychiatric rehabilitation program (mid-sized urban Canadian). | n = 105<br><br>68% male<br>Age: mean = 35 (ranged from 20 to 58 years).<br>Diagnoses not reported.          | 93%           | Telephone and face to face interviews. | Reasons for smoking, why it is hard to quit, beliefs about support required to change smoking behaviour. | Focus groups.<br>Type of analysis not specified. | Addiction: 53%<br>Difficulty resisting cravings: 33%<br>Enjoyment: 20%<br>Relieving symptoms: 20%<br>Habit: 19%<br>Boredom: 17%<br>Most or all friends are smokers: 12.5%<br>Low cost of cigarettes: 8% to smoke, lack of support to quit.<br>Smoking as a social activity. | Afraid of giving up old friend. Withdrawal symptoms. Enhanced mood. Cheap thrill. Coping strategy when stressed. Something to do. Apathy and daily drudgery associated with psychiatric disability. Peer pressure to smoke. Lack of support from peers to quit. Smoking as a social activity. Receiving cigarettes from family and friends. |
| Van Dongen et al 1999 (94).<br><br>USA | Examine the experiences of persons with persistent mental illness and smoking. | Outpatient clinic, Midwest, USA.                                               | n = 36<br>75% male<br>Age: mean ranged from 45 to 49.<br>Diagnosis: Schizophrenia (70% - 90%); schizoaffect | Not reported  | Cross-sectional survey.                | Not reported.                                                                                            | Interviews.<br>Content analysis.                 | Habit and routine: 58%<br>Socialization: 58%<br>Relaxation: 42%<br>Addiction to nicotine: 33%                                                                                                                                                                               | Smoking provided structure and activity. Something to do. Way to deal with stress.                                                                                                                                                                                                                                                          |

| Author,<br>Year,<br>Country | Study<br>aims | Setting | Sample                                                                      | Response<br>rate | Type of<br>survey<br>(cross-<br>sectional,<br>etc) | Outcome<br>measure<br>(and info<br>on survey<br>instrument) | Qualitative<br>method and<br>type of<br>analysis | Quantitative results<br>(barrier and prevalence) | Qualitative data<br>(barriers identified) |
|-----------------------------|---------------|---------|-----------------------------------------------------------------------------|------------------|----------------------------------------------------|-------------------------------------------------------------|--------------------------------------------------|--------------------------------------------------|-------------------------------------------|
|                             |               |         | tive and<br>mood<br>disorders<br>were the<br>other<br>diagnoses<br>present. |                  |                                                    |                                                             |                                                  |                                                  |                                           |

Supplementary file 5. Overview of study characteristics

### Study characteristics

Almost half (40%) of the studies had been published from 2009 onwards. Apart from three studies (80, 97, 104), all participants were adults aged 18 years and over. Studies were carried out in the USA (n=29) (42, 44, 47, 49, 54, 60, 64, 66, 67, 70, 72, 75, 76, 78, 80, 82, 83, 88-92, 94, 95, 97-101); Australia (n=15) (45, 48, 50, 52, 62, 68, 69, 74, 77, 79, 81, 87, 93, 96, 103); the United Kingdom (n=12) (43, 46, 55, 56, 61, 63, 65, 85, 86, 102, 104); Canada (n=5), New Zealand (n=2) (71, 73) and France (n=1) (53). Qualitative (n=52) (42-53, 55-63, 65-72, 74-81, 83, 85-93, 96, 97, 101, 103, 104); quantitative (n=8) (21, 54, 64, 82, 95, 99, 100, 102) and mixed method studies (n=3) (73, 84, 94) were included. Of the qualitative studies, 26 used focus group methods (42, 44, 45, 47-49, 52, 55, 56, 59, 60, 66, 67, 70-72, 74-76, 78, 80, 88, 90, 91, 101, 103); 17 used interviews (43, 46, 50, 51, 53, 61, 63, 65, 69, 77, 83, 85-87, 93, 96, 97) and eight used a combination of interviews and focus groups (57, 58, 62, 68, 79, 81, 89, 92). One qualitative paper used participant observation methods (104). All eight quantitative studies utilised cross-sectional survey methods (21, 54, 64, 82, 95, 99, 100, 102). Two mixed methods studies used both cross-sectional surveys and interview ((73, 94) and one mixed methods study used cross-sectional surveys and focus groups (84). Twelve studies included only female participants (46, 47, 49, 51, 57-59, 61, 70, 79, 81, 85), five of which were carried out with pregnant women (47, 51, 61, 81, 85). Two studies were carried out with men only; partners of women who were pregnant (50) and disadvantaged former miners (65).

### Quality assessment of qualitative studies

This figure includes assessment of the qualitative components of the mixed methods studies. The majority of studies did not explicitly state their study design (n = 42); of those that did, most used Grounded Theory (50, 53, 55, 87, 92, 93). Most studies provided adequate descriptions of the study sites; participants; data collection methods and analysis techniques. Only a small number of studies (n = 9) (44, 47, 51, 69, 70, 72, 77, 78, 90, 104) addressed the role of the relationship between participants and the researcher and fewer still identified potential assumptions and biases of the researcher (n = 5) (44, 47, 55, 77, 92). Studies generally performed poorly when assessed on four components of

1  
2  
3 trustworthiness, with only 17 studies meeting all four criteria (credibility; transferability; dependability and confirmability) (42, 45, 49, 51, 59,  
4 61, 65, 67, 68, 71, 72, 74, 76, 77, 79, 80, 87). It should be noted that none of the mixed methods studies explicitly described their methodology  
5 as mixed methods nor did they report integrating the qualitative and quantitative findings in a systematic way.  
6  
7

### 8 **Quality assessment of quantitative studies**

9  
10 The results of the quality assessment of quantitative studies are provided in Supplementary file 6. This table also provides assessment of  
11 the quantitative components of included mixed methods studies. Sample sizes in the quantitative studies ranged from 36 to 500 participants.  
12 Response rates ranged from 42% to over 97% (four studies did not provide response rates) (73, 94, 98, 99). All but one study (84) clearly stated  
13 eligibility criteria. The majority of studies adequately described the research aims (54, 64, 73, 82, 84, 95, 98-100); source of participants(54, 82,  
14 84, 94, 99, 100) and addressed potential sources of bias within their analysis (54, 82, 100, 102). All studies stated their outcome *a priori* and no  
15 conflicts of interest were identified. Eight studies used convenience sampling (82, 84, 94, 95, 98-100, 102). The validity and reliability of survey  
16 measures used to assess barriers to cessation were reported in one study (54). Three studies employed techniques such as pilot testing and input  
17 from key stakeholders in developing the tools used (54, 64, 102).  
18  
19  
20  
21  
22  
23  
24  
25  
26  
27  
28  
29  
30  
31  
32  
33  
34  
35  
36  
37  
38  
39  
40  
41  
42  
43  
44  
45  
46  
47

1  
2  
3  
4  
5  
6  
7  
8  
9  
10  
11  
12  
13  
14  
15  
16  
17  
18  
19  
20  
21  
22  
23  
24  
25  
26  
27  
28  
29  
30  
31  
32  
33  
34  
35  
36  
37  
38  
39  
40  
41  
42  
43  
44  
45  
46  
47

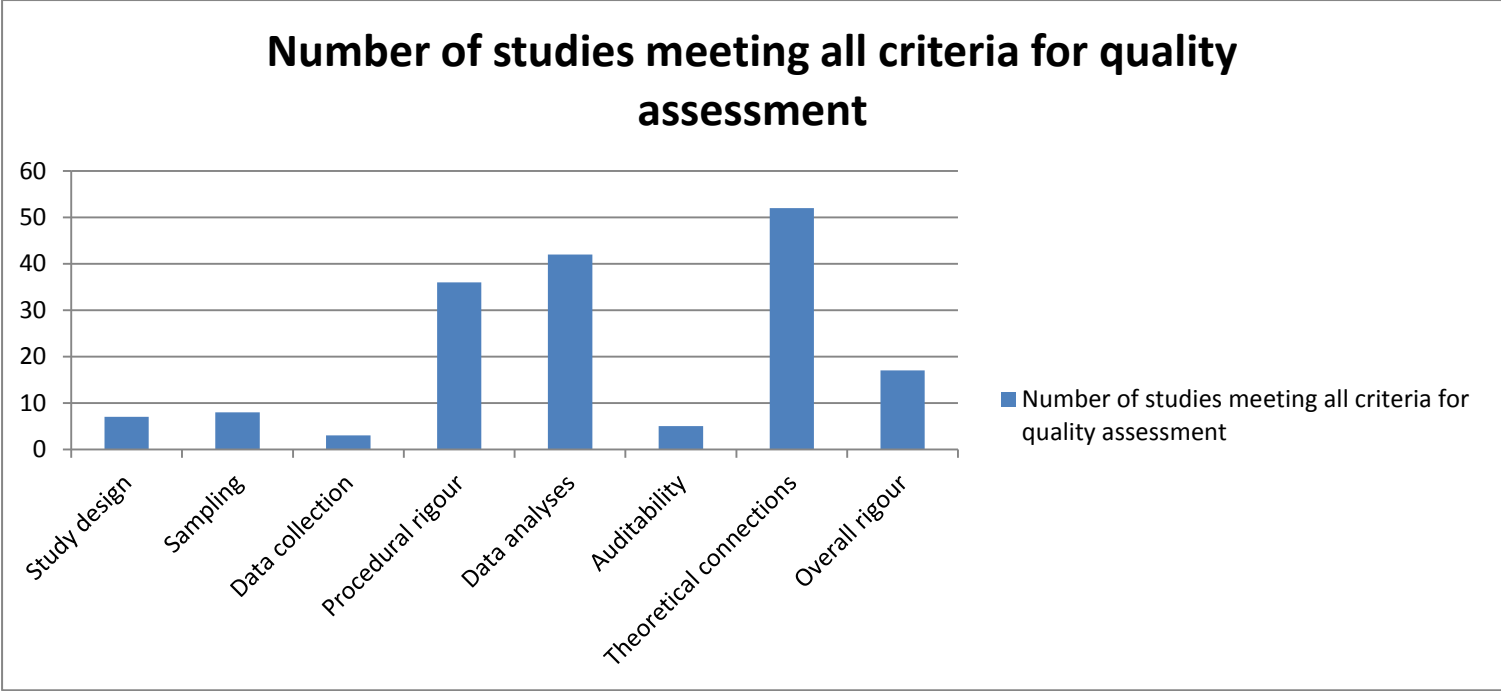

Supplementary figure 6. Quality of included qualitative studies and qualitative components of mixed methods studies (n = 55)

Peer review only



## Supplementary file 7. Results of the quality assessment of quantitative studies and quantitative components of mixed methods studies

| Study author and year     | Aims | Selection methods    |                              |                                   | Was the measurement of variables appropriate? |                       |                          | Control of bias    |                            |                            | Was the use of statistics appropriate? |              | Conflict of interest |
|---------------------------|------|----------------------|------------------------------|-----------------------------------|-----------------------------------------------|-----------------------|--------------------------|--------------------|----------------------------|----------------------------|----------------------------------------|--------------|----------------------|
|                           |      | Aims clearly stated? | Eligibility criteria stated? | Source of participants described? | Selection method?                             | Validity of measures? | Reliability of measures? | Other method used? | Potential sources of bias? | Methods to deal with bias? | Response rate (%)?                     | Sample size? |                      |
| Price et al 1994 (54)     | ✓    | ✓                    | ✓                            | Random sampling                   | ✓                                             | ✓                     | ✓                        | ✓                  | ✗                          | 42                         | 500                                    | ✓            | ✓                    |
| Rosenthal et al 2013 (64) | ✓    | ✗                    | ✓                            | Random sampling                   | ✗                                             | ✗                     | ✓                        | ✓                  | ✗                          | 73                         | 350                                    | ✓            | ✓                    |
| Dickens et al 2005 (102)  | ✗    | ✓                    | ✓                            | Convenience sample                | ✗                                             | ✗                     | ✓                        | ✓                  | ✗                          | 44.1                       | 45                                     | ✓            | ✓                    |
| Connor et al 2002 (100)   | ✓    | ✓                    | ✓                            | Convenience sample                | ✗                                             | ✗                     | ✗                        | ✓                  | ✓                          | >97                        | 236                                    | ✓            | ✓                    |
| Asher et al 2003 (95)     | ✓    | ✓                    | ✓                            | Convenience sample                | ✗                                             | ✗                     | ✗                        | ✗                  | ✗                          | 73                         | 96                                     | ✓            | ✓                    |
| Carosella et al 1999 (82) | ✓    | ✓                    | ✓                            | Convenience sample                | ✗                                             | ✗                     | ✗                        | ✓                  | ✗                          | 80.9                       | 89                                     | ✓            | ✓                    |
| Orleans et al 1993(98)    | ✓    | ✗                    | ✓                            | Convenience sample                | ✗                                             | ✗                     | ✓                        | ✗                  | ✗                          | ✗                          | ✗                                      | ✓            | ✗                    |
| Arnsten et al 2004(99)    | ✓    | Y                    | ✗                            | Convenience sample.               | ✗                                             | ✗                     | ✗                        | ✗                  | ✗                          | ✗                          | 98                                     | ✓            | ✓                    |

1  
2  
3  
4  
5  
6  
7  
8  
9  
10  
11  
12  
13  
14  
15  
16  
17  
18  
19  
20  
21  
22  
23  
24  
25  
26  
27  
28  
29  
30  
31  
32  
33  
34  
35  
36  
37  
38  
39  
40  
41  
42  
43  
44  
45  
46  
47

| Study author and year     | Aims | Selection methods            |                                   |                    | Was the measurement of variables appropriate? |                          |                    | Control of bias            |                            |                    | Was the use of statistics appropriate? |                                  | Conflict of interest |
|---------------------------|------|------------------------------|-----------------------------------|--------------------|-----------------------------------------------|--------------------------|--------------------|----------------------------|----------------------------|--------------------|----------------------------------------|----------------------------------|----------------------|
|                           |      | Eligibility criteria stated? | Source of participants described? | Selection method?  | Validity of measures?                         | Reliability of measures? | Other method used? | Potential sources of bias? | Methods to deal with bias? | Response rate (%)? | Sample size?                           | Primary outcome stated a priori? |                      |
| Glover et al 2005 (73)    | ✓    | ✓                            | ✗                                 | Not reported       | ✗                                             | ✗                        | ✗                  | ✗                          | ✗                          | ✗                  | 130                                    | ✓                                | ✓                    |
| Van Dongen et al 1999(94) | ✗    | ✓                            | ✓                                 | Convenience sample | ✓                                             | ✗                        | ✗                  | ✗                          | ✗                          | N                  | 36                                     | ✓                                | ✓                    |
| Goldberg et al 1996(84)   | ✓    | ✓                            | ✓                                 | Convenience sample | ✗                                             | ✗                        | ✗                  | ✗                          | ✗                          | 93                 | 105                                    | ✓                                | ✓                    |

Supplementary file 8: Detailed summary of barriers identified

## **Individual & lifestyle factors**

### ***Relaxation, stress and mood management***

Thirty eight qualitative studies identified stress management as a significant barrier to smoking cessation (43-49, 51, 53, 55-57, 59, 61-63, 66, 68, 69, 74, 75, 77, 78, 80, 81, 83, 84, 86, 87, 89-91, 93, 94, 97, 101, 103, 104). Smoking was used as a coping mechanism (45, 51, 56-59, 63, 68, 83, 84, 86, 91, 93) in reaction to daily stressors as well as the stress inherent in disadvantaged lives. Three quantitative studies reported stress management as a barrier to quitting with Maori participants (48%) (73), participants with substance use disorders (39%) (98) and homeless participants (44%) (100). Of note, participants in two studies reported that smoking also directly contributed to the stress experienced by participants (44, 104).

Participants also reported using smoking to manage their emotions and mood (51, 59, 66, 77, 78, 84, 87, 92, 97, 125). Twenty three percent of participants from a Maori sample indicated managing emotions was a barrier to quitting (73), 42% of individuals with a substance use disorder (95).

### ***Enjoyment of smoking***

Across 21 studies, smoking was described as an enjoyable activity (43, 48, 49, 53, 56, 57, 59, 61, 73, 75-77, 82-84, 86-88, 91, 92, 104). In quantitative studies, proportions of participants who said enjoyment prevented them from quitting ranged from 25% (73) to 47.2% (82). Smoking was viewed as an affordable, rewarding luxury (43, 48, 57, 73, 87, 91) and the only pleasurable activity some participants had (43, 49, 53, 56, 59).

### ***Physical addiction to nicotine***

Addiction to nicotine was reported as a barrier in 15 qualitative studies (42, 43, 47, 53, 61-63, 66, 68, 69, 75, 77, 78, 85, 86) (97) and four quantitative studies (54, 73, 84, 94). Proportions of individuals who reported addiction to nicotine as a barrier ranged from 33% (94) to 86% (54). The experience of withdrawal symptoms was a barrier to quitting in nine studies (47, 50, 63, 66, 68, 74, 78, 84, 92). Management of cravings was a barrier in ten qualitative studies (42, 47, 62, 63, 66, 74, 78, 80, 84, 92) and one quantitative study (100) where 50% of homeless participants cited cravings as a barrier to cessation. Withdrawal symptoms were especially a barrier for individuals with substance use disorder, with 87% feeling tense or irritable if they quit smoking, and 48% saying their cravings would be so strong they couldn't stand it (95).

### ***Behavioural habit of smoking***

1  
2  
3  
4  
5  
6  
7  
8  
9  
10  
11  
12  
13  
14  
15  
16  
17  
18  
19  
20  
21  
22  
23  
24  
25  
26  
27  
28  
29  
30  
31  
32  
33  
34  
35  
36  
37  
38  
39  
40  
41  
42  
43  
44  
45  
46  
47  
48  
49  
50  
51  
52  
53  
54  
55  
56  
57  
58  
59  
60

Five quantitative studies (54, 73, 82, 84, 94) and nine qualitative studies (43, 50, 59, 62, 69, 74, 77, 78, 86) reported habit as a barrier to smoking. Proportions of participants who endorsed habit as a barrier ranged from 19% to 58% in studies carried out with people with a mental illness (82, 84, 94); 82% in a low income sample (54) and 73% in a study conducted with Maori participants (73).

### ***Perceived mental health benefits of smoking***

Smoking in order to manage the symptoms of mental illness was identified in the majority of studies carried out with participants with a mental illness (82-92, 96) as well as managing the side effects from medications (86, 88, 92). Smoking in order to protect mental health was also found in one study conducted with low income pregnant women (61). In two community surveys a history of depression was reported as a barrier to smoking cessation (51, 68).

Participants with mental illness in two studies perceived that the benefits of continuing to smoke far outweighed the potential risks of stopping, which included relapse, rehospitalisation and suicidal thoughts (83, 92). A large portion (78%) of individual's with substance use disorder would feel anxious if they tried to quit (95).

### ***Avoidance of weight gain***

Fourteen studies reported that smoking was used in weight management, and that potential weight gain was a barrier to quitting (42, 45-47, 52, 58, 61, 66, 68, 78, 85, 92, 95, 100).

Twenty percent of homeless participants endorsed weight gain as a barrier to quitting (100) and in 20% of individual with substance use disorder (95). Smoking was also used to suppress appetite for individuals diagnosed with an eating disorder (85) and for low income pregnant women (61).

### ***Competing priorities and needs***

Competing needs, including finding shelter or food for those who were homeless (101); addressing mental health issues (83, 92); or addressing other physical illnesses (49, 68, 93) often meant that smoking cessation was not a priority for participants or those involved in their care in ten studies (49, 57, 68, 69, 81, 83, 85, 92, 93, 101).

### ***Rationalisations to continue smoking***

Lack of acknowledgement of the health-related harm of tobacco use was reported in eight studies (49, 51, 61, 68, 76, 81, 83, 91). Rationalisations to continue smoking were also reported in ten studies (47, 48, 51, 55, 61, 68, 72, 76, 83, 91) and included the belief that smoking certain brands/strengths of cigarettes meant a lower likelihood of developing cancer (76); not experiencing any signs or symptoms of smoking related illness at the present time (47, 51); fatalistic beliefs (49); providing examples of relatives or other persons who are

1  
2  
3 smokers and who are healthy (74, 81); and the experience of disadvantage as a protective  
4 factor against developing smoking related illness (83).

### 7 ***Other substance use***

8  
9 Participants identified associations between smoking and other behaviours in seven studies  
10 including alcohol use (42, 68, 70, 74, 78) cannabis and caffeine (42, 75). Approximately one  
11 third (34%) of Maori participants identified alcohol use as a barrier to quitting smoking(73).  
12 Smoking was used to manage other addictions and prevent relapse (53, 83, 97). Alternatives  
13 to smoking included drug use, relapse to alcohol addiction and losing control; all of which  
14 were unacceptable to participants (49, 56, 83). For 41% of those diagnosed with a substance  
15 use disorder, quitting would make it harder to remain sober and 13% wouldn't be able to  
16 control their cravings for other substances if they quit smoking (95).

### 23 ***Sense of autonomy***

24  
25 Participants across seven studies reported that smoking provided a sense of autonomy,  
26 control (49, 51, 62, 77, 87, 91, 92) and power (93) over lives that were often chaotic and out  
27 of control. On the other hand, participants with mental illness identified the lack of control  
28 they had over smoking as a barrier to quitting (96).

### 32 ***Low confidence and perceived difficulty of quitting***

33  
34 Low self-efficacy (45, 87, 99, 100) and low confidence (86, 91) was reported in six studies.  
35 The belief that willpower was the single-most important factor needed to successfully quit  
36 was reported in five studies (44, 45, 58, 61, 63). Participants also reported that the process of  
37 quitting smoking was too hard (45, 74, 90, 92), including 73.5% of prisoners and ex-prisoners  
38 surveyed (102) and 58% of individuals with a substance use disorder (95). Smokers with  
39 depression reported it was hopeless to try to quit (96). However, the opposite was reported by  
40 a sample of former miners, who maintained they were able to stop smoking at will, with  
41 minimal difficulty and need for support (65). Twenty five percent of individuals with  
42 substance abuse disorder said they did not know how to quit (95).

### 49 ***Perceived cognitive benefits of smoking***

50  
51 Enhanced concentration and other cognitive benefits associated with smoking were reported  
52 in six studies (44, 77, 84, 87-89), including 56% of individuals with a substance use disorder  
53 (95).

### 56 ***Combating loneliness***

57  
58 Smoking provided a way of reducing loneliness in six studies (45, 53, 59, 87, 91, 92);  
59 providing companionship (87) and was described as a friend (45, 92) by participants.

### 60 ***Perceived low individual risk of harm***

1  
2  
3 Whilst most of the studies reported that participants had good knowledge of the health risks  
4 associated with smoking, low levels of knowledge about the risks of smoking were identified  
5 as barriers to cessation (51, 81, 89, 91) including one study conducted with pregnant women  
6 (51) and two studies conducted with Indigenous Australian pregnant women (74, 81). Low  
7 knowledge of the risks of smoking whilst pregnant were also identified (51, 81). In a study  
8 conducted with former miners, participants were more likely to attribute their current health  
9 issues to coal dust exposure, rather than smoking. Additionally, participants rationalised  
10 continuing smoking by weighing the risks of smoking in comparison to the risks of coal  
11 mining (65).  
12  
13

### 14 ***Low motivation***

15 Low levels of motivation to quit smoking were reported in four studies, all of which were  
16 carried out with participants who were diagnosed with a mental illness (86, 88, 91, 92).  
17 Additionally, 38% of individuals from a low income areas (64) and 47% of individuals  
18 diagnosed with a substance use disorder (95) also reported low levels of motivation to quit.  
19  
20

### 21 ***Failed past quit attempts***

22 Past failed attempts to quit smoking were identified as barriers to future attempts in two  
23 qualitative studies (55, 68) as was a sense of hopelessness after trying many methods and  
24 remaining unsuccessful (81).  
25  
26

### 27 ***Positive smoker image***

28 Two studies within low income samples reported associations between smoking and  
29 perceptions of being cool and sophisticated (50, 52) and one study with persons with a mental  
30 illness found that participants believed that non-smokers do not have as much fun as smokers  
31 (91). In a sample of young people with mental illness, positive media images were also  
32 reported as barriers to quitting (97).  
33  
34

### 35 **Social and community networks**

#### 36 ***High prevalence and acceptability of smoking in community***

37 Eight qualitative (46, 47, 63, 69, 73, 74, 92, 104) and four quantitative (54, 95, 100, 102)  
38 studies found that being around other smokers was a barrier to quitting. This finding is  
39 compounded by participants describing the high prevalence of smoking amongst family and  
40 friends in 21 studies (44, 45, 49, 52, 56, 62, 63, 66, 68, 70, 75, 77, 79-81, 84, 87, 89, 90, 97,  
41 104) and in the wider community in 17 studies (44, 45, 49, 52, 56, 60, 63, 66, 68, 70, 75, 77,  
42 79-81, 87, 90). Tobacco was readily available and easily accessible within disadvantaged  
43 communities (44, 56, 60, 70, 77, 84, 85, 104) and smoking was considered to be a highly  
44  
45  
46  
47  
48  
49  
50  
51  
52  
53  
54  
55  
56  
57  
58  
59  
60

1  
2  
3 acceptable (52, 73, 75-77, 79-81) and normalised behaviour (45, 49, 56, 60, 63, 73, 75-77, 79,  
4 81).

### 5 6 7 ***Lack of social support***

8  
9 A lack of social support to quit smoking was reported in 12 studies (49, 51, 52, 58, 61, 62,  
10 69, 73, 78, 92, 100, 101) and a lack of support from family and friends in particular was a  
11 barrier in 14 qualitative studies (42, 47, 48, 51, 63, 68, 69, 71, 73, 77, 78, 81, 85, 88). In one  
12 quantitative study, only 21% of homeless individuals agreed that close friends or family  
13 would be helpful in quitting smoking and only 29% believed that close friends and family  
14 wanted them to quit very much (99). Similarly, 26% of homeless respondents cited a lack of  
15 support during a quit attempt as a barrier to successfully quit (100).

### 16 17 18 19 20 21 ***Smoking as a social activity***

22  
23 Tobacco use and socialising were linked in two quantitative studies (82, 94) and 20  
24 qualitative studies (42, 46, 50, 52, 56, 67-69, 73, 74, 79, 81, 83, 84, 86, 87, 89, 91, 92, 97):  
25 where participants reported that using tobacco helped to facilitate social connections amongst  
26 family, friends and strangers.

### 27 28 29 30 ***Lack of health and other professional support to quit***

31  
32 Twelve qualitative studies (45, 48, 49, 51, 68, 71, 77, 80, 85, 86, 89, 101) and one  
33 quantitative study (102) reported a perceived lack of support from health professionals  
34 regarding smoking cessation. Cases of family members and health professionals actively  
35 discouraging quit attempts and encouraging maintenance of smoking due to concerns about  
36 the individual's mental health (86, 87, 89, 90) or because smoking was perceived to be the  
37 individual's only source of enjoyment (47, 71, 73, 77) were reported. Three studies identified  
38 tobacco use by health professionals and others involved in the participants' care as a barrier  
39 to cessation (71, 89, 102). Over half (55.9%) of prisoners surveyed reported observing  
40 members of staff smoking as a barrier to quitting (102). Participants also reported that  
41 cigarettes were used as a way to reward or punish behaviour by health professionals and other  
42 service providers (87, 89, 90, 103). Twenty-nine percent of prisoners also indicated that not  
43 receiving cessation support from prison staff prevented them from quitting smoking (102).  
44 Twenty-six percent of substance abusing individuals reported they did not have enough  
45 support to quit. The study involving at risk youth identified mixed messages sent by those in  
46 places of authority (for example teachers, members of the police force) also acted as a barrier  
47 for at risk youth (104).  
48  
49  
50  
51  
52  
53  
54  
55  
56  
57  
58  
59  
60

## **Living and working conditions**

### ***Access to resources to quit***

Thirteen studies cited the cost of Nicotine Replacement Therapy (NRT) and other pharmacological interventions as a barrier to access that directly prevented cessation (45, 48, 55, 62, 63, 67, 68, 72, 75, 87, 90, 92, 101). Cost was also a barrier for 40% of participants diagnosed with substance abuse disorder (95). There was also poor knowledge and low uptake of programs available to participants (45, 49, 55-57, 66, 68, 72, 80, 90, 101, 103).

### ***Boredom and limited structure in day to day life***

Fourteen qualitative studies (43-45, 47, 48, 59, 69, 80, 88, 89, 91, 93, 101, 103) and four quantitative studies (54, 73, 82, 84) indicated that smoking alleviated boredom. Limited opportunities for leisure and high levels of unemployment often meant that participants had large amounts of free time and smoking was used to mark the transition from one task or part of the day to another (49, 53, 87, 91, 96, 101).

### ***Concerns regarding cessation treatment and services***

Ten qualitative studies reported that participants were reluctant to access psychological or pharmacological resources to quit smoking due to a belief that these treatments were largely ineffective (49, 51, 55-57, 63, 66, 74, 75, 91). In one survey almost a third (31%) of homeless participants reported that no existing pharmacological treatments would be able to help them stop smoking (100).

The possible side effects of pharmacological interventions (43, 67, 72, 75, 101), uncertainty about the correct use of pharmacological interventions (45, 75, 101); or the possible interactions between NRT and other medications (101) presented barriers to cessation. Homeless participants in one study expressed concerns about the possibility of becoming addicted to NRT (101). Concerns about existing treatment services included lack of continuity of care(85); being capable of addressing smoking simultaneously with mental health issues (85, 87, 90); cultural appropriateness (68, 71, 72, 80); feeling judged by programs (55, 61, 85, 87) and a cynicism regarding the medical profession (71). Telephone quitlines were not viewed as culturally appropriate resources (71) and participants were sceptical of the effectiveness of quitline support (45).

### ***Stressful factors***

Participants across ten studies (49, 51, 53, 56, 57, 59, 62, 68, 69, 79) reported that increased stress due to the events and life circumstances intrinsically linked to their socioeconomic position were barriers to quitting smoking. The following situations compounded feelings of stress, hopelessness and meant that cessation was not prioritised: unemployment (49, 51, 53,



1  
2  
3 56, 57, 59, 62, 79); poverty and financial stress (56, 59, 69, 79); housing issues including  
4 substandard housing, homelessness and overcrowding (49, 51, 69, 79); violence and crime  
5 (49, 56, 62, 69); drug use (49, 56, 69); increased morbidity and mortality (62, 68, 69, 79);  
6 chronic disease (68, 69); low education (59, 69); and limited recreational activities (56, 59).  
7  
8  
9

10 Two studies carried out with Indigenous Australians found that additional stressors  
11 experienced by this group included racism, stigma, dispossession of traditional lands, high  
12 burden of illness, premature deaths within the community and collective grief and loss  
13 relating to the Stolen Generation and the removal of children (68, 69, 79). Unique stressors  
14 facing prisoners including; transfers within and across prisons; legal matters; bullying;  
15 missing family; and restricted movement for most of the day were also identified (103).  
16  
17  
18  
19  
20

### 21 *Living and working environments*

22 Participants reported lack of control over exposure to smoking due to others smoking in the  
23 home; a lack of smoke free policies or policies that did not cover the whole environment or  
24 were only partially enforced were barriers to quitting smoking (47, 51, 68, 90, 97, 100). In  
25 one study involving prisoners, 59% of participants reported that the ‘smoky atmosphere’  
26 within the prison was a barrier to quitting (102). Work environments that were conducive to  
27 smoking also presented a barrier in one study (52).  
28  
29  
30  
31  
32

### 33 *Social and geographical isolation*

34 Social and geographical isolation were reported in four studies as barriers to quitting (49, 56,  
35 58, 79). Geographical isolation referred to the lack of access to cessation services that rural  
36 and remote communities experience. Social isolation referred to the racial and economic  
37 segregation that separates disadvantaged neighbourhoods and individuals from others (49)  
38 further contributing to differences in perceived acceptability and prevalence of tobacco use  
39 (56, 79). Unsafe neighbourhoods also limited unnecessary outings and inhibited accessing  
40 smoking cessation support (49).  
41  
42  
43  
44  
45  
46  
47  
48

### 49 **Cultural, socioeconomic and environmental factors**

#### 50 *Cultural norms*

51 The importance of tobacco use in traditional and ceremonial contexts was expressed in three  
52 studies concerning American Indian participants (66, 67, 76) and one study including  
53 Aboriginal and Torres Strait Islander participants (79) and one study including Alaska Native  
54 participants (80). Cultural values of self-reliance, pride and independence prevented  
55 American Indian participants from seeking cessation support in two studies (75, 76) and in  
56 one study with low income African Americans (49). Historical factors including  
57 dispossession of land, colonisation and collective grief and loss of cultural identity were  
58  
59  
60

1  
2  
3 reported as barriers to cessation in three studies of Aboriginal and Torres Strait Islanders (68,  
4 69, 79). Studies carried out with American Indian participants (67, 76) and Aboriginal and  
5 Torres Strait Islanders (68, 69, 77, 79) highlighted the function of smoking as a way of  
6 maintaining cultural identity and belonging. Maintenance of identity and belonging were also  
7 reported in three studies concerning people with a mental illness (87, 88, 92) and one study  
8 carried out with low income participants in the UK (56). In prison settings, use of cigarettes  
9 as a substitute currency also provided a barrier to cessation (103).

### 16 *Socioeconomic factors*

17 Two qualitative studies reported participants linking their status as smokers and their inability  
18 to quit smoking with their lower socioeconomic position (59, 91). In a study conducted with  
19 people with a mental illness, participants endorsed the belief that non-smokers were able to  
20 refrain from becoming smokers because they were more advantaged (91) and in a study of  
21 low income women, participants referred to their low socioeconomic position and poverty as  
22 a barrier to quitting smoking (59).  
23  
24  
25  
26  
27  
28  
29  
30  
31  
32  
33  
34  
35  
36  
37  
38  
39  
40  
41  
42  
43  
44  
45  
46  
47  
48  
49  
50  
51  
52  
53  
54  
55  
56  
57  
58  
59  
60

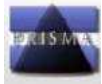

# PRISMA 2009 Checklist

1  
2  
3  
4  
5  
6  
7  
8  
9  
10  
11  
12  
13  
14  
15  
16  
17  
18  
19  
20  
21  
22  
23  
24  
25  
26  
27  
28  
29  
30  
31  
32  
33  
34  
35  
36  
37  
38  
39  
40  
41  
42  
43  
44  
45  
46  
47  
48  
49

| Section/topic                      | #  | Checklist item                                                                                                                                                                                                                                                                                              | Reported on page # |
|------------------------------------|----|-------------------------------------------------------------------------------------------------------------------------------------------------------------------------------------------------------------------------------------------------------------------------------------------------------------|--------------------|
| <b>TITLE</b>                       |    |                                                                                                                                                                                                                                                                                                             |                    |
| Title                              | 1  | Identify the report as a systematic review, meta-analysis, or both.                                                                                                                                                                                                                                         | 1                  |
| <b>ABSTRACT</b>                    |    |                                                                                                                                                                                                                                                                                                             |                    |
| Structured summary                 | 2  | Provide a structured summary including, as applicable: background; objectives; data sources; study eligibility criteria, participants, and interventions; study appraisal and synthesis methods; results; limitations; conclusions and implications of key findings; systematic review registration number. | 2                  |
| <b>INTRODUCTION</b>                |    |                                                                                                                                                                                                                                                                                                             |                    |
| Rationale                          | 3  | Describe the rationale for the review in the context of what is already known.                                                                                                                                                                                                                              | 3-4                |
| Objectives                         | 4  | Provide an explicit statement of questions being addressed with reference to participants, interventions, comparisons, outcomes, and study design (PICOS).                                                                                                                                                  | 3-5                |
| <b>METHODS</b>                     |    |                                                                                                                                                                                                                                                                                                             |                    |
| Protocol and registration          | 5  | Indicate if a review protocol exists, if and where it can be accessed (e.g., Web address), and, if available, provide registration information including registration number.                                                                                                                               | 5                  |
| Eligibility criteria               | 6  | Specify study characteristics (e.g., PICOS, length of follow-up) and report characteristics (e.g., years considered, language, publication status) used as criteria for eligibility, giving rationale.                                                                                                      | 6                  |
| Information sources                | 7  | Describe all information sources (e.g., databases with dates of coverage, contact with study authors to identify additional studies) in the search and date last searched.                                                                                                                                  | 5                  |
| Search                             | 8  | Present full electronic search strategy for at least one database, including any limits used, such that it could be repeated.                                                                                                                                                                               | See Table 1        |
| Study selection                    | 9  | State the process for selecting studies (i.e., screening, eligibility, included in systematic review, and, if applicable, included in the meta-analysis).                                                                                                                                                   | 6-7                |
| Data collection process            | 10 | Describe method of data extraction from reports (e.g., piloted forms, independently, in duplicate) and any processes for obtaining and confirming data from investigators.                                                                                                                                  | 7                  |
| Data items                         | 11 | List and define all variables for which data were sought (e.g., PICOS, funding sources) and any assumptions and simplifications made.                                                                                                                                                                       | 6 -8 (see Table 2) |
| Risk of bias in individual studies | 12 | Describe methods used for assessing risk of bias of individual studies (including specification of whether this was done at the study or outcome level), and how this information is to be used in any data synthesis.                                                                                      | 7                  |
| Summary measures                   | 13 | State the principal summary measures (e.g., risk ratio, difference in means).                                                                                                                                                                                                                               | 7                  |
| Synthesis of results               | 14 | Describe the methods of handling data and combining results of studies, if done, including measures of consistency (e.g., $I^2$ for each meta-analysis). <a href="http://bmjopen.bmj.com/site/about/guidelines.xhtml">http://bmjopen.bmj.com/site/about/guidelines.xhtml</a>                                | 7-8                |

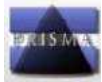

# PRISMA 2009 Checklist

Page 1 of 2

| Section/topic                 | #  | Checklist item                                                                                                                                                                                           | Reported on page #                                  |
|-------------------------------|----|----------------------------------------------------------------------------------------------------------------------------------------------------------------------------------------------------------|-----------------------------------------------------|
| Risk of bias across studies   | 15 | Specify any assessment of risk of bias that may affect the cumulative evidence (e.g., publication bias, selective reporting within studies).                                                             | 7                                                   |
| Additional analyses           | 16 | Describe methods of additional analyses (e.g., sensitivity or subgroup analyses, meta-regression), if done, indicating which were pre-specified.                                                         | NA                                                  |
| <b>RESULTS</b>                |    |                                                                                                                                                                                                          |                                                     |
| Study selection               | 17 | Give numbers of studies screened, assessed for eligibility, and included in the review, with reasons for exclusions at each stage, ideally with a flow diagram.                                          | 8 (See Figure 1)                                    |
| Study characteristics         | 18 | For each study, present characteristics for which data were extracted (e.g., study size, PICOS, follow-up period) and provide the citations.                                                             | See supplementary files 1, 2 and 3)                 |
| Risk of bias within studies   | 19 | Present data on risk of bias of each study and, if available, any outcome level assessment (see item 12).                                                                                                | 9 (See supplementary files 4 and 5)                 |
| Results of individual studies | 20 | For all outcomes considered (benefits or harms), present, for each study: (a) simple summary data for each intervention group (b) effect estimates and confidence intervals, ideally with a forest plot. | See supplementary files 1, 2 and 3)                 |
| Synthesis of results          | 21 | Present results of each meta-analysis done, including confidence intervals and measures of consistency.                                                                                                  | See supplementary files 7 and 8 and tables 3 and 4) |
| Risk of bias across studies   | 22 | Present results of any assessment of risk of bias across studies (see Item 15).                                                                                                                          | 9-10                                                |
| Additional analysis           | 23 | Give results of additional analyses, if done (e.g., sensitivity or subgroup analyses, meta-regression [see Item 16]).                                                                                    | NA                                                  |
| <b>DISCUSSION</b>             |    |                                                                                                                                                                                                          |                                                     |
| Summary of evidence           | 24 | Summarize the main findings including the strength of evidence for each main outcome; consider their relevance to key groups (e.g., healthcare providers, users, and policy makers).                     | 11-19                                               |

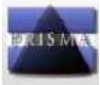

# PRISMA 2009 Checklist

1  
2  
3  
4  
5  
6  
7  
8  
9  
10  
11  
12  
13  
14  
15  
16  
17  
18  
19  
20  
21  
22  
23  
24  
25  
26  
27  
28  
29  
30  
31  
32  
33  
34  
35  
36  
37  
38  
39  
40  
41  
42  
43  
44  
45  
46  
47  
48  
49

|                |    |                                                                                                                                                               |       |
|----------------|----|---------------------------------------------------------------------------------------------------------------------------------------------------------------|-------|
| Limitations    | 25 | Discuss limitations at study and outcome level (e.g., risk of bias), and at review-level (e.g., incomplete retrieval of identified research, reporting bias). | 16-17 |
| Conclusions    | 26 | Provide a general interpretation of the results in the context of other evidence, and implications for future research.                                       | 11-19 |
| <b>FUNDING</b> |    |                                                                                                                                                               |       |
| Funding        | 27 | Describe sources of funding for the systematic review and other support (e.g., supply of data); role of funders for the systematic review.                    | 1     |

From: Moher D, Liberati A, Tetzlaff J, Altman DG, The PRISMA Group (2009). Preferred Reporting Items for Systematic Reviews and Meta-Analyses: The PRISMA Statement. PLoS Med 6(6): e1000097. doi:10.1371/journal.pmed1000097

For more information, visit: [www.prisma-statement.org](http://www.prisma-statement.org).

Page 2 of 2

# BMJ Open

## Perceived barriers to smoking cessation in selected vulnerable groups: A systematic review of the qualitative and quantitative literature.

|                                 |                                                                                                                                                                                                                                                                                                                                                                                                                                                                                                                                                                            |
|---------------------------------|----------------------------------------------------------------------------------------------------------------------------------------------------------------------------------------------------------------------------------------------------------------------------------------------------------------------------------------------------------------------------------------------------------------------------------------------------------------------------------------------------------------------------------------------------------------------------|
| Journal:                        | <i>BMJ Open</i>                                                                                                                                                                                                                                                                                                                                                                                                                                                                                                                                                            |
| Manuscript ID:                  | bmjopen-2014-006414.R1                                                                                                                                                                                                                                                                                                                                                                                                                                                                                                                                                     |
| Article Type:                   | Research                                                                                                                                                                                                                                                                                                                                                                                                                                                                                                                                                                   |
| Date Submitted by the Author:   | 11-Nov-2014                                                                                                                                                                                                                                                                                                                                                                                                                                                                                                                                                                |
| Complete List of Authors:       | Twyman, Laura; University of Newcastle, School of Medicine and Public Health<br>Bonevski, Billie; University of Newcastle, School of Medicine & Public Health<br>Paul, Chris; University of Newcastle, School of Medicine and Public Health;<br>Hunter Medical Research Institute, Priority Research Centre for Health Behaviour and Health Behaviour Research Group<br>Bryant, Jamie; University of Newcastle, School of Medicine and Public Health; Hunter Medical Research Institute, Priority Research Centre for Health Behaviour and Health Behaviour Research Group |
| <b>Primary Subject Heading</b>: | Smoking and tobacco                                                                                                                                                                                                                                                                                                                                                                                                                                                                                                                                                        |
| Secondary Subject Heading:      | Smoking and tobacco                                                                                                                                                                                                                                                                                                                                                                                                                                                                                                                                                        |
| Keywords:                       | barriers, vulnerable populations, review, smoking cessation, disadvantage                                                                                                                                                                                                                                                                                                                                                                                                                                                                                                  |
|                                 |                                                                                                                                                                                                                                                                                                                                                                                                                                                                                                                                                                            |

SCHOLARONE™  
Manuscripts

Only

1  
2  
3 **Perceived barriers to smoking cessation in selected vulnerable groups: A systematic**  
4 **review of the qualitative and quantitative literature.**  
5  
6  
7  
8

9 **Twyman, Laura,<sup>1\*</sup> Bonevski, Billie,<sup>1</sup> Paul, Chris,<sup>2</sup> & Bryant, Jamie.<sup>2</sup>**  
10

11 **<sup>1</sup>School of Medicine and Public Health, Faculty of Health, University of Newcastle,**  
12 **Callaghan, NSW 2308, Australia.**  
13

14 **<sup>2</sup> Priority Research Centre for Health Behaviour and Health Behaviour Research**  
15 **Group, University of Newcastle & Hunter Medical Research Institute**  
16  
17

18 **\*Correspondence to: Laura Twyman. Email: [Laura.Twyman@newcastle.edu.au](mailto:Laura.Twyman@newcastle.edu.au)**  
19

20 **Contact address: Level 5 McAuley building Calvary Mater Hospital Waratah Postcode:**  
21 **2298 New South Wales Australia**  
22

23 **Keywords:** smoking cessation, vulnerable populations, disadvantage, barriers, systematic  
24 **review**  
25

26 **Word count:** 5720  
27  
28  
29  
30  
31  
32  
33  
34  
35  
36  
37  
38  
39  
40  
41  
42  
43  
44  
45  
46  
47  
48  
49  
50  
51  
52  
53  
54  
55  
56  
57  
58  
59  
60

## ABSTRACT

**Objectives:** To identify barriers which are common and unique to six selected vulnerable groups: low socioeconomic status; Indigenous; mental illness and substance abuse; homeless; prisoners and at-risk youth.

**Design:** A systematic review was carried out to identify the perceived barriers to smoking cessation within six vulnerable groups.

**Data sources:** Medline, EMBASE, CINAHL and PsycInfo were searched using keywords and MeSH terms from each database's inception published prior to March 2014.

**Study selection:** Studies that provided either qualitative or quantitative (i.e. longitudinal, cross-sectional or cohort surveys) descriptions of self-reported perceived barriers to quitting smoking in one of the six aforementioned vulnerable groups were included.

**Data extraction:** Two authors independently assessed studies for inclusion and extracted data.

**Results:** 65 eligible papers were identified: 24 with low socioeconomic groups, 16 with Indigenous groups, 18 involving people with a mental illness, three with homeless groups, two involving prisoners and one involving at risk youth. One study identified was carried out with participants who were homeless and addicted to alcohol and/or other drugs. Barriers common to all vulnerable groups included: smoking for stress management, lack of support from health and other service providers and the high prevalence and acceptability of smoking in vulnerable communities. Unique barriers were identified for people with a mental illness (e.g. maintenance of mental health), Indigenous groups (e.g. cultural and historical norms), prisoners (e.g. living conditions), people who are homeless (e.g. competing priorities) and at risk youth (e.g. high accessibility of tobacco).

**Conclusions:** Vulnerable groups experience common barriers to smoking cessation, in addition to barriers that are unique to specific vulnerable groups. Individual-level and



1  
2  
3 community and social network-level interventions are priority areas for future smoking  
4  
5 cessation interventions within vulnerable groups.  
6

7 **Trial registration:** A protocol for this review has been registered with PROSPERO  
8  
9 International Prospective Register of Systematic Reviews [Identifier: CRD42013005761].  
10  
11

## 12 13 14 298

### 15 16 17 18 Strengths:

- 19  
20 • This study provides a valuable synthesis of the literature examining the perceived  
21  
22 barriers to smoking cessation common and unique across six vulnerable groups.  
23

### 24 25 Limitations:

- 26  
27 • While the overall quality of the studies included in this review was acceptable, most  
28  
29 studies failed to provide information regarding the trustworthiness (qualitative  
30  
31 studies) or reliability and validity (quantitative studies) of the research.  
32  
33  
34  
35  
36  
37  
38  
39  
40  
41  
42  
43  
44  
45  
46  
47  
48  
49  
50  
51  
52  
53  
54  
55  
56  
57  
58  
59  
60

## INTRODUCTION

Tobacco use is the leading global cause of avoidable death worldwide (1) and a key modifiable risk factor for the development of a range of diseases, including cardiovascular disease, chronic obstructive pulmonary disease, and some cancers (1).

The prevalence of tobacco smoking is inversely related to socioeconomic position (SEP) in high-income countries (1). For example, in 2010 in Australia, the prevalence of smoking was 24.6% in the lowest socioeconomic areas compared to 12.5% in the highest socioeconomic areas (2). The highest rates of smoking are evident amongst the most vulnerable groups, including Indigenous groups (31% - 51.8%) (3-5); people with a mental illness (31.7-32.4%) (6), those with substance abuse disorders (77%) (7); the homeless (73%) (8); and prisoners (78% - 84%) (9, 10). For the purpose of this review, vulnerable groups are defined as groups that are more likely to experience social disadvantage due to lower income, material or cultural deprivation, and social exclusion (11).

Conflicting evidence exists regarding whether the rates of quit attempts in low SEP are similar to (12, 13) or lower (14-17) than the rates made by smokers in higher SEP. However, the success rate of quit attempts for lower SEP individuals is much lower than the success rate in higher SEP counterparts (13, 18).

There are many reasons quit success may be lower in vulnerable groups (19, 20). Within the health behaviour literature, factors that prevent an individual from undertaking health behaviour change have been referred to as barriers. Barriers are often conceptualised as either structural or individual psychosocial factors (21). Structural barriers include systems, organisations and the relationship between systems and individuals, for example lack of accessible smoking cessation programs. Individual barriers refer to the subjective experience of the individual, for example physical addiction to nicotine.

1  
2  
3 This definition of barriers is congruent with the social determinants of health  
4 framework (SDHF)(22). The SDHF holds that an individual's health is influenced by factors  
5 across many levels, from individual genetic and physical characteristics, social and  
6 community networks, to broader influences of culture, socioeconomic determinants and the  
7 environment. This framework has been used to examine the determinants of health  
8 inequities(23). Because the SDHF classifies determinants of health as individual, social and  
9 broader cultural and environmental factors, it also allows the identification of distinct levels  
10 of intervention for health policies.  
11  
12  
13  
14  
15  
16  
17  
18  
19

20  
21 Within the general population, cross-sectional studies have found variation in the  
22 most commonly reported barriers to cessation. Enjoyment (79%)(24); cravings (75%) (24);  
23 and stress management (36% - 63%) (24, 25) are the most frequently reported barriers.  
24 Irritability (39% - 42%) (26); habit (39%) (25); withdrawal symptoms (28% - 48%) (24, 25);  
25 fear of failure (17% - 32%) (24, 25) and concern about weight gain (27%-34%) (24-26) are  
26 also identified as barriers to cessation.  
27  
28  
29  
30  
31  
32  
33

34 The effect of socioeconomic position on perceived barriers to quitting was examined  
35 in a representative sample (n = 2,133) in the United Kingdom (27). Enjoyment (51%) and  
36 stress relief (47%) were the most frequently endorsed motives for continuing to smoke across  
37 the sample; however as socioeconomic position decreased, the likelihood of reporting stress  
38 management and avoiding boredom as motives to continue to smoke increased. This  
39 suggests that smokers from vulnerable groups may experience barriers to smoking cessation  
40 differently than those in the general population (27).  
41  
42  
43  
44  
45  
46  
47  
48

49 Smoking in vulnerable groups is known to be influenced and perpetuated by a  
50 complex range of social, cultural and environmental factors (28) including high acceptability  
51 of smoking (29) and higher retailing of tobacco in low socioeconomic areas (30). Two  
52 previous studies have reviewed the literature to examine barriers to quitting smoking amongst  
53  
54  
55  
56  
57  
58  
59  
60

1  
2  
3 vulnerable groups. One focussed on Aboriginal pregnant women (31), and one focussed on  
4  
5 the barriers to smoking cessation service utilisation amongst low income smokers (32). Both  
6  
7 reviews found pro-smoking social norms, inadequate knowledge regarding smoking related  
8  
9 risks, and lack of access to appropriate cessation services inhibited participants' ability to  
10  
11 quit.  
12

13  
14 As the term vulnerable applies to multiple discrete groups, it is important to  
15  
16 understand which barriers (if any) are unique for example, cultural factors that inhibit  
17  
18 smoking cessation may be unique to some Indigenous groups (31). A systematic examination  
19  
20 of potential unique barriers would be valuable in order to develop and deliver appropriate  
21  
22 suites of intervention techniques for specific vulnerable groups.  
23

24  
25 Understanding the perceived barriers to quitting is important in order to better  
26  
27 understand smoking, relapse and quitting related behaviours, to inform appropriate policy,  
28  
29 and facilitate the development of effective tailored smoking cessation interventions. Given  
30  
31 the exceptionally high smoking rates and low quit success amongst vulnerable groups, there  
32  
33 is a critical need for a systematic and comprehensive review of the literature of the perceived  
34  
35 barriers to quitting smoking amongst vulnerable smokers.  
36  
37  
38  
39  
40

#### 41 **Aims**

42  
43 This systematic review aims to provide a comprehensive synthesis of the self-reported  
44  
45 barriers to quitting smoking within six vulnerable groups by reviewing the qualitative and  
46  
47 quantitative literature. The review will focus on the perceived, self-reported barriers to  
48  
49 smoking cessation in six selected vulnerable groups: low socioeconomic status (low SES),  
50  
51 Indigenous, mental illness and substance abuse, homeless, prisoners, and at-risk youth. These  
52  
53 groups were selected because they represent a large proportion of those classified as  
54  
55 vulnerable to socioeconomic disadvantage (33); who exhibit smoking rates higher than that of  
56  
57  
58  
59  
60

1  
2  
3 the general population (2-10); and who are identified as priority groups targeted for smoking  
4  
5 cessation programs and policies by peak health authorities (34-36). Specifically, the review  
6  
7 aims to:

- 8  
9  
10  
11 a) identify barriers which are common across all vulnerable groups included in the review  
12  
13 and  
14  
15 b) identify barriers that may be unique to specific groups.  
16  
17  
18  
19

20  
21 The results of the review will be used to develop a practical model to help understand the  
22  
23 barriers to quitting amongst vulnerable groups and to aid smoking cessation intervention  
24  
25 development.  
26  
27  
28

## 29 **METHOD**

### 30 **Study design**

31  
32 Guidelines for the reporting of systematic reviews (PRISMA) (37) and qualitative  
33  
34 synthesis (ENTREQ) (38) were followed. A protocol for this review was registered with  
35  
36 PROSPERO International Prospective Register of Systematic Reviews [Identifier:  
37  
38 CRD42013005761].  
39  
40  
41  
42  
43  
44

### 45 **Databases and search**

46  
47 Medline, EMBASE, CINAHL and PsycInfo were searched using keywords and  
48  
49 MeSH terms from each database's inception published prior to March 2014. The reference  
50  
51 lists of key articles and reviews were also manually searched in order to identify any other  
52  
53 relevant articles. An extensive list of search terms was used in order to ensure that as many  
54  
55 relevant articles as possible were captured (See Table 1).  
56  
57  
58  
59  
60

Table 1. Search strategy

|    |                                                |
|----|------------------------------------------------|
| 1  | Tobacco/                                       |
| 2  | Tobacco use/                                   |
| 3  | Tobacco use cessation/                         |
| 4  | Tobacco smoking/                               |
| 5  | Smoking/                                       |
| 6  | Smoking Cessation/                             |
| 7  | Tobacco use cessation/                         |
| 8  | Tobacco dependence/                            |
| 9  | Cigarette smoking/                             |
| 10 | Or/1-9                                         |
| 11 | Homeless youth/                                |
| 12 | Homeless persons/                              |
| 13 | Housing/                                       |
| 14 | Homeless mentally ill/                         |
| 15 | Homelessness or homeless/                      |
| 16 | Community programs/                            |
| 17 | Or/11-16                                       |
| 18 | Prisoner or Prisons/                           |
| 19 | Correctional Health Services/                  |
| 20 | Correctional facilities/                       |
| 21 | Jail/                                          |
| 22 | Or/18-21                                       |
| 23 | Anxiety/                                       |
| 24 | Depression/                                    |
| 25 | Schizophrenia/                                 |
| 26 | Mentally Ill persons/                          |
| 27 | Mental health/                                 |
| 28 | Mental illness/                                |
| 29 | Mental disorder/                               |
| 30 | Mental disease/                                |
| 31 | Mental patient/                                |
| 32 | Mental health services/                        |
| 33 | Substance-related disorders/                   |
| 34 | Drug use/                                      |
| 35 | Drug abuse/                                    |
| 36 | Alcohol-related disorders/                     |
| 37 | Or/23-36                                       |
| 38 | Adolescent behaviour/                          |
| 39 | Juvenile delinquency/                          |
| 40 | Juvenile offenders/                            |
| 41 | Disruptive Behaviors or disruptive behaviours/ |
| 42 | At-risk youth/                                 |
| 43 | At-risk young people/                          |
| 44 | Or/38-43                                       |
| 45 | Indigenous/                                    |
| 46 | Indigenous health/                             |
| 47 | Indigenous peoples/                            |
| 48 | Indigenous populations/                        |
| 49 | Aboriginal/                                    |
| 50 | Aboriginal and Torres Strait Islanders/        |
| 51 | Inuits/                                        |
| 52 | Eskimo/                                        |
| 53 | Alaska Native/                                 |

1  
2  
3  
4  
5  
6  
7  
8  
9  
10  
11  
12  
13  
14  
15  
16  
17  
18  
19  
20  
21  
22  
23  
24  
25  
26  
27  
28  
29  
30  
31  
32  
33  
34  
35  
36  
37  
38  
39  
40  
41  
42  
43  
44  
45  
46  
47  
48  
49  
50  
51  
52  
53  
54  
55  
56  
57  
58  
59  
60

---

|    |                                                                                     |
|----|-------------------------------------------------------------------------------------|
| 54 | Indians/                                                                            |
| 55 | Native American/                                                                    |
| 56 | Native Hawaiian/                                                                    |
| 57 | American Indian/                                                                    |
| 58 | Indians, North American/                                                            |
| 59 | Indians, South American/                                                            |
| 60 | Indians, Central American/                                                          |
| 61 | First Nations/                                                                      |
| 62 | Pacific Islander/                                                                   |
| 63 | Maori/                                                                              |
| 64 | Oceanic ancestry group/                                                             |
| 65 | American Native Continental Ancestry Group/                                         |
| 66 | Or/45-65                                                                            |
| 67 | Poverty                                                                             |
| 68 | Social status                                                                       |
| 69 | Social class                                                                        |
| 70 | Low income population                                                               |
| 71 | Inequalities                                                                        |
| 72 | Socioeconomic status                                                                |
| 73 | Socioeconomic factors                                                               |
| 74 | Disadvantaged                                                                       |
| 75 | Underserved                                                                         |
| 76 | Or/67-75                                                                            |
| 77 | Related to smoking cessation/quitting smoking                                       |
| 78 | Correlated with smoking cessation/quitting smoking                                  |
| 79 | Associated with smoking cessation/quitting smoking                                  |
| 80 | That affect smoking cessation/quitting smoking                                      |
| 81 | That inhibit smoking cessation/quitting smoking                                     |
| 82 | That prevent smoking cessation/quitting smoking                                     |
| 83 | Barriers to smoking cessation/quitting smoking                                      |
| 84 | Factor\$ or Determinant\$ or Variable\$ or Covariable\$ or Predictor\$ or Barrier\$ |
| 85 | Or/77-84                                                                            |
| 86 | 10 AND 85 AND 17                                                                    |
| 87 | 10 AND 85 AND 22                                                                    |
| 88 | 10 AND 85 AND 37                                                                    |
| 89 | 10 AND 85 AND 44                                                                    |
| 90 | 10 AND 85 AND 66                                                                    |
| 91 | 10 AND 85 AND 76                                                                    |

---

### Inclusion and exclusion criteria

Studies that provided either qualitative or quantitative (i.e. longitudinal, cross-sectional or cohort surveys) descriptions of perceived self-reported barriers to quitting smoking in low SES groups, Indigenous groups, people with a mental illness or substance

1  
2  
3 abuse problems, people who are homeless, prisoners or at-risk youth were included. See  
4  
5 Table 2 for definitions used as inclusion criteria for each vulnerable group. Only studies  
6  
7 carried out in high income countries were included as middle and low income countries may  
8  
9 present different contextual, political and economic barriers which require separate  
10  
11 consideration. Only studies published in English were included as resources required to  
12  
13 translate articles were beyond the scope of this review. Intervention studies were excluded, as  
14  
15 barriers discussed within these studies related to use of the intervention being tested and not  
16  
17 barriers to smoking cessation per se. Studies examining factors associated with quit attempts  
18  
19 or success were excluded unless they included results on the perceived barriers self-reported  
20  
21 by participants from vulnerable groups. Studies describing *provider* reports of the barriers to  
22  
23 the provision of smoking cessation support or treatment, and unpublished grey literature,  
24  
25 were also excluded. There were no cut offs for sample size.  
26  
27  
28  
29  
30  
31  
32  
33  
34  
35  
36  
37  
38  
39  
40  
41  
42  
43  
44  
45  
46  
47  
48  
49  
50  
51  
52  
53  
54  
55  
56  
57  
58  
59  
60



Table 2. Inclusion criteria definitions of each group.

| Group                          | Definition                                                                                                                                                                                                                                                                                                                        |
|--------------------------------|-----------------------------------------------------------------------------------------------------------------------------------------------------------------------------------------------------------------------------------------------------------------------------------------------------------------------------------|
| Low socioeconomic status (SES) | Because definitions of low SES vary across high income countries this study used an inclusive definition of low SES. Studies were included if they described participants as being low SES and gave at least one measure of SES. This measure could be income (above/below poverty level); address in deprived neighbourhood etc. |
| Indigenous groups              | The following definition was used to define potential Indigenous studies in accordance with previous studies (39): “the experiences shared by a group of people who have inhabited a country for thousands of years, which often contrast with those of other groups residing in the same country for a few hundred years” (40).  |
| Mental Illness                 | People with a mental illness were defined as individuals who had been diagnosed with a mental illness, severe mental illness or were described as inpatients or outpatients in a mental health rehabilitation facility. Substance use disorders were also included. All mental illnesses were included.                           |
| At-risk youth                  | At-risk youth were defined as individuals under the age of 21 who have experienced or are experiencing; problems at school; physical, sexual or psychological abuse; mental or physical health problems; economic disadvantage or who have committed a violent or delinquent act (USA Code).                                      |
| Prisoners                      | Prisoners included both those currently incarcerated and those ex-prisoners living in the community.                                                                                                                                                                                                                              |
| Homeless                       | Homeless individuals were defined as those individuals described as meeting national criteria for homelessness or those individuals accessing services provided to homeless persons.                                                                                                                                              |
| Smoker                         | Smokers were defined as self-reported daily or occasional cigarette smokers. Studies that also assessed ex-smokers were only included if the majority of participants were current smokers, or if the results were reported by smoking status. Studies were excluded if they focussed solely on ex-smokers or non-smokers.        |

### **Data extraction**

The titles and abstracts of retrieved publications were assessed by one reviewer (LT) against eligibility criteria and excluded if they did not meet inclusion criteria. A second reviewer (a Research Assistant) independently assessed 20% of the returned abstracts for inclusion with 100% agreement between reviewers. Data from included journal articles was extracted into summary tables independently by one reviewer (LT) and a random 20% checked by a second (Research Assistant). Agreement was again high (97%). Discrepancies were settled by discussion between the reviewers. Data extracted from the articles included: study aims, setting, sample characteristics, response rates, study methodology, data analysis and the barriers identified. Barriers were defined as factors that prevented smoking cessation and/or quit attempts or were reported as primary reasons for continuing to smoke.

### **Risk of bias in individual studies**

Quality assessment was performed independently by all authors, with two reviewers per manuscript. The methodological quality of qualitative studies was assessed using the McMaster Qualitative Criteria Form (41). Quantitative studies were assessed using a tool adapted from the STROBE statement (42). As there is a lack of an agreed, valid and reliable measure to assess the quality of mixed methods studies (43), both the McMaster guidelines and the adapted quantitative framework were applied to the corresponding qualitative and quantitative components of any mixed methods studies identified.

### **Synthesis of results**

Results were synthesised by vulnerable group using narrative synthesis and inductive data analysis techniques. Narrative synthesis allows the examination of studies that are highly heterogeneous in their research questions, samples and methods (44, 45). In order to avoid

1  
2  
3 potential biases, care was taken to also identify points of difference between studies (46).  
4  
5 Where a barrier was reported in more than one study, this was recorded. In quantitative  
6  
7 studies, the proportion of respondents reporting each barrier was calculated. Barriers were  
8  
9 combined into categories and then classified using the SDHF (22). For the purposes of this  
10  
11 review, individual factors were defined as physical or psychological barriers to quitting  
12  
13 smoking: for example, the individual's level of nicotine dependence or motivation to quit.  
14  
15 Lifestyle factors were defined as health behaviours (including alcohol and other drug use)  
16  
17 that impeded an individual's ability to quit. Social and community networks were defined as  
18  
19 the impact of an individual's family and friend networks, and the wider community. Living  
20  
21 and working conditions encompassed factors including housing, health care, education and  
22  
23 employment. The final domain was the broader socioeconomic, cultural and environmental  
24  
25 background perceived to influence smoking cessation.  
26  
27  
28  
29  
30  
31

## 32 RESULTS

### 33 Search results

34  
35 After duplicates were removed, 21,767 studies were identified from electronic  
36  
37 searches and a further 27 from manual searches. Of those, 65 studies met inclusion criteria  
38  
39 and were included in the review (see Figure 1). Supplementary file 1 contains a list of full  
40  
41 text articles that were retrieved, reviewed and excluded as per the inclusion criteria. Two  
42  
43 systematic reviews concerning Indigenous Australian pregnant women (31) and pregnant  
44  
45 women (47); and two critical reviews providing summaries of the barriers to quitting (32, 48)  
46  
47 were also identified from hand searches.  
48  
49  
50  
51

### 52 Study characteristics

53  
54  
55  
56  
57  
58  
59  
60

1  
2  
3 The majority of studies (n = 24) identified barriers to smoking cessation in low SES groups  
4 (29, 49-71), Indigenous groups (n = 16) (72-87), and people with a mental illness (n = 18)  
5 (88-105) including two concerning those with substance use disorders (101, 104). Three  
6  
7 studies reported barriers to quitting within the homeless (106-108) and two reported barriers  
8  
9 within prisoner groups (109, 110). One study with at-risk youth was identified (111). Two  
10  
11 other studies concerning Alaska Native participants (age range from 11 to 18) (86) and  
12  
13 people with a mental illness (age range from 16 to 23) (103) included younger people as  
14  
15 participants. One study was identified that was carried out with participants who were both  
16  
17 homeless and addicted to drugs and/or alcohol (112). Since the study comprised participants  
18  
19 that met criteria for inclusion in two of the vulnerable groups included in this review (both  
20  
21 the homeless and mental illness/substance use groups) this study was included in a seventh  
22  
23 category containing “multiple” participant groups. Supplementary files 2, 3 and 4 summarize  
24  
25 the included quantitative, qualitative and mixed methods studies respectively. An overview of  
26  
27 the characteristics of included studies can be found in Supplementary file 5.  
28  
29  
30  
31  
32  
33  
34  
35

### 36 **Quality assessment of qualitative studies**

37  
38 The results of the quality assessment of qualitative studies are presented in  
39  
40 Supplementary file 6. Overall, the quality of studies varied widely. The majority of studies  
41  
42 did not explicitly state their study design (n = 38); of those that did, most used Grounded  
43  
44 Theory (57, 59, 61, 93, 98, 99). Most studies provided adequate descriptions of the study  
45  
46 sites; participants; data collection methods and analysis techniques. Studies generally  
47  
48 performed poorly when assessed on four components of trustworthiness, with only fifteen  
49  
50 studies meeting all four criteria (credibility; transferability; dependability and confirmability)  
51  
52 [41,44,48,50,58,60,64,65,68,69,72,73,75,76,84]. It should be noted that none of the mixed  
53  
54  
55  
56  
57  
58  
59  
60

1  
2  
3 methods studies explicitly described their methodology as mixed methods nor did they report  
4  
5 integrating the qualitative and quantitative findings in a systematic way.  
6  
7

### 8 9 10 **Quality assessment of quantitative studies**

11  
12 The results of the quality assessment of quantitative studies are presented in  
13  
14 Supplementary file 7. Sample sizes in the quantitative studies ranged from 36 to 500  
15  
16 participants. Response rates ranged from 42% to over 97% (three studies did not provide  
17  
18 response rates) [70,91,92]. All but one study [81] clearly stated eligibility criteria. All studies  
19  
20 stated their outcome a priori and no conflicts of interest were identified. The validity and  
21  
22 reliability of survey measures used to assess barriers to cessation were reported in one study  
23  
24 [53]. Three studies employed techniques such as pilot testing and input from key stakeholders  
25  
26 in developing the tools used [53,77,95].  
27  
28  
29  
30  
31

### 32 **Perceived barriers to smoking cessation**

33  
34 The barriers to quitting smoking endorsed over multiple studies included: smoking for  
35  
36 stress management; enjoyment of smoking; addiction to nicotine; habit; social acceptability  
37  
38 of smoking; lack of support to quit and access to quit resources; boredom; stressful life  
39  
40 factors; pro-smoking living environments; smoking cultural norms and socioeconomic  
41  
42 disadvantage. Figure 2 demonstrates the barriers reported in this review categorised by the  
43  
44 SDHF. For brevity, the current results section will focus on those barriers that were common  
45  
46 across all groups and unique to certain vulnerable groups. Supplementary file 8 provides a  
47  
48 detailed description of all of the barriers identified in this review. Table 3 provides a  
49  
50 summary of the barriers extracted from the qualitative studies. References of studies that  
51  
52 report one or more barriers at a given level of the SDHF are included in Table 3. Table 4  
53  
54  
55  
56  
57  
58  
59  
60

1  
2  
3 provides a summary of the results of quantitative studies including the proportion of  
4  
5 participants endorsing the barrier and the study reference.  
6  
7

### 8 9 10 **Barriers common across all groups**

11 Three barriers were present in all six vulnerable groups included in this review: 1)  
12 stress management, 2) lack of support to quit from health professionals and other service  
13 providers, and 3) high prevalence and acceptability of smoking within vulnerable  
14 communities.  
15  
16  
17  
18  
19

20 Within the SDHF, stress management was categorised as an individual level barrier.  
21 Forty qualitative studies identified stress management as a significant barrier to smoking  
22 cessation (50-56, 58, 59, 61-63, 65, 67-69, 72, 74, 75, 80, 81, 83, 84, 86, 87, 89, 90, 92, 93,  
23 95-97, 99, 100, 103, 105, 108, 110-112). Smoking was used as a coping mechanism (52, 58,  
24 62-65, 69, 74, 89, 90, 92, 97, 99) in reaction to daily stressors as well as the stress inherent in  
25 vulnerable lives. Three quantitative studies reported stress management as a barrier to  
26 quitting with Maori participants (48%) (79), participants with substance use disorders (39%)  
27 (104) and homeless participants (44%) (107). Of note, participants in two studies reported  
28 that smoking also directly contributed to the stress experienced by participants (51, 111).  
29 Participants also reported using smoking to manage their emotions and mood (58, 65, 72, 83,  
30 84, 90, 93, 98, 103, 113). Twenty three percent of participants from a Maori sample indicated  
31 managing emotions was a barrier to quitting (79), 42% of individuals with a substance use  
32 disorder (101).  
33  
34  
35  
36  
37  
38  
39  
40  
41  
42  
43  
44  
45  
46  
47  
48

49 High prevalence and acceptability of smoking within vulnerable communities was  
50 categorised as a community and social network level barrier. Eight qualitative (53, 54, 69, 75,  
51 79, 80, 98, 111) and four quantitative (60, 101, 107, 109) studies found that being around  
52 other smokers was a barrier to quitting. This finding is reinforced by participants describing  
53  
54  
55  
56  
57  
58  
59  
60

1  
2  
3 the high prevalence of smoking amongst family and friends in 22 studies (29, 51, 52, 56, 62,  
4 68, 69, 72, 74, 76, 81, 83, 85-87, 90, 93, 95, 96, 103, 111, 112) and in the wider community  
5 in 18 studies (29, 51, 52, 56, 62, 66, 69, 72, 74, 76, 81, 83, 85-87, 93, 96, 112). Tobacco was  
6 readily available and easily accessible within vulnerable communities (51, 62, 66, 76, 83, 90,  
7 91, 111) and smoking was considered to be a highly acceptable (29, 79, 81-83, 85-87) and  
8 normalised behaviour (52, 56, 62, 66, 69, 79, 81-83, 85, 87).

9  
10  
11  
12  
13  
14  
15  
16 Lack of support to quit from health and other service providers to quit was also  
17 categorised as a social and community network barrier. Other service providers include  
18 management and staff in prisons, homeless shelters and organisations, and members of the  
19 community. Thirteen qualitative studies (52, 55, 56, 58, 74, 77, 83, 86, 91, 92, 95, 108, 112)  
20 and one quantitative study (109) reported a perceived lack of support from health  
21 professionals regarding smoking cessation. Cases of family members and health professionals  
22 actively discouraging quit attempts and encouraging maintenance of smoking due to concerns  
23 about the individual's mental health (92, 93, 95, 96, 112) or because smoking was perceived  
24 to be the individual's only source of enjoyment (54, 77, 79, 83) were reported. Three studies  
25 identified tobacco use by health professionals and others involved in the participants' care as  
26 a barrier to cessation (77, 95, 109). Over half (55.9%) of prisoners surveyed reported  
27 observing members of staff smoking as a barrier to quitting (109). Studies involving people  
28 with a mental illness and prisoners identified use of cigarettes in order to reward or punish  
29 behaviour by health professionals and other service providers (93, 95, 96, 110) as a barrier to  
30 quitting. Twenty-nine percent of prisoners also indicated that not receiving cessation support  
31 from prison staff prevented them from quitting smoking (109). Twenty-six percent of  
32 substance abusing individuals reported they did not have enough support to quit. One study  
33 involving at risk youth identified smoking being unaddressed by teachers and members of the  
34 police force as a barrier to smoking cessation (111).

Table 3. A summary of the self-reported barriers to smoking cessation – qualitative and mixed methods studies by vulnerable group.

| Barrier                                 | Low SES groups (n = 22)         | Indigenous groups (n = 16)           | People with a mental illness (n=13) | Homeless groups (n = 3) | Prisoner groups (n = 2) | At risk youth (n = 1) | Multiple groups (n = 1) |
|-----------------------------------------|---------------------------------|--------------------------------------|-------------------------------------|-------------------------|-------------------------|-----------------------|-------------------------|
| <b>Individual and lifestyle factors</b> |                                 |                                      |                                     |                         |                         |                       |                         |
| Stress management                       | (50-59, 61-63, 65-69)           | (72, 74, 75, 79, 81, 83, 84, 86, 87) | (89, 90, 92, 93, 95-98, 105)        | (108)                   | (110)                   | (111)                 | (112)                   |
| Enjoyment                               | (50, 54-56, 59, 62, 63, 65, 67) | (79, 81-83)                          | (89, 90, 92-94, 97, 98, 105)        |                         |                         | (111)                 |                         |
| Addiction                               | (49, 50, 54, 57, 59, 67-69)     | (72, 74, 75, 81, 83, 84, 86)         | (90-92, 98)                         |                         |                         |                       |                         |
| Habit                                   | (50, 57, 65, 68)                | (75, 79, 83, 84)                     | (92, 105)                           |                         |                         |                       |                         |
| Mental health benefits                  | (58, 67)                        | (74)                                 | (89, 91-99)                         |                         |                         |                       |                         |
| Weight gain                             | (29, 49, 52-54, 64, 67)         | (72, 74, 84)                         | (91, 98)                            |                         |                         |                       |                         |
| Competing priorities                    | (56, 63)                        | (74, 75, 87)                         | (89, 91, 98, 99)                    | (108)                   |                         |                       |                         |
| Rationalisations                        | (54-56, 58, 61, 67)             | (74, 78, 82, 87)                     | (89, 97)                            |                         |                         |                       |                         |
| Other substance use                     | (49, 56, 59, 62)                | (74, 76, 81, 84)                     | (89)                                |                         |                         |                       | (112)                   |
| Autonomy                                | (56, 58, 68)                    | (83)                                 | (93, 97-99)                         |                         |                         |                       |                         |
| Low confidence                          | (52, 53, 56, 63, 67, 69)        | (73, 84)                             | (92, 96, 98)                        |                         |                         |                       | (112)                   |
| Cognitive benefits                      | (51)                            | (83)                                 | (93-95)                             |                         |                         |                       |                         |
| Loneliness                              | (52, 59, 65)                    |                                      | (93, 97, 98)                        |                         |                         |                       |                         |
| Low risk of harm                        | (58)                            | (87)                                 | (95, 97)                            |                         |                         |                       |                         |
| Low motivation                          |                                 |                                      | (92, 94, 97, 98)                    |                         |                         |                       |                         |
| Past failed attempts                    | (61)                            | (74)                                 |                                     |                         |                         |                       |                         |
| Positive smoker image                   | (29, 57)                        |                                      | (97)                                |                         |                         |                       |                         |
| <b>Social and community networks</b>    |                                 |                                      |                                     |                         |                         |                       |                         |
| Prevalence and acceptability            | (29, 51-54, 56, 62, 66, 68, 69) | (72, 74, 76, 79, 83, 85-87)          | (90, 91, 93, 95, 96, 105)           | (108)                   | (110)                   | (111)                 | (112)                   |
| Lack of social                          | (29, 49, 54-56, 58, 64,         | (74, 75, 77, 79, 83, 84)             | (91, 94, 98)                        | (108)                   |                         |                       |                         |



|                                                          |                              |                           |                              |       |       |       |       |
|----------------------------------------------------------|------------------------------|---------------------------|------------------------------|-------|-------|-------|-------|
| support                                                  | 67-69)                       |                           |                              |       |       |       |       |
| Social activity                                          | (29, 49, 53, 57, 62)         | (73-75, 79, 85, 87)       | (89, 90, 92, 93, 95, 97, 98) |       |       |       |       |
| Lack of health and other professional support            | (52, 54-56, 58)              | (74, 77, 79, 83, 86)      | (91-93, 95, 96)              | (108) | (110) | (111) | (112) |
| <b>Living and working conditions</b>                     |                              |                           |                              |       |       |       |       |
| Access to quit resources                                 | (52, 55, 56, 61-64)          | (72-74, 78, 81, 85, 86)   | (93, 96, 98)                 | (108) | (110) |       |       |
| Boredom                                                  | (50-52, 54-56, 59, 65)       | (75, 86)                  | (90, 94, 95, 97, 99)         | (108) | (110) |       |       |
| Concerns regarding treatment                             | (50, 52, 56, 58, 61-63, 69)  | (72-74, 77, 78, 81, 86)   | (91, 93, 96, 105)            | (108) |       |       |       |
| Stressful factors                                        | (56, 58, 59, 62, 63, 65, 68) | (74, 75, 85)              |                              |       | (110) |       |       |
| Living and working circumstances                         | (29, 54, 58)                 | (74)                      | (96)                         |       |       |       |       |
| <b>Cultural, socioeconomic and environmental factors</b> |                              |                           |                              |       |       |       |       |
| Cultural norms                                           | (56, 62)                     | (72-75, 78, 81-83, 85-87) | (93, 94, 98)                 |       | (110) |       |       |
| Socioeconomic factors                                    | (65)                         |                           | (97)                         |       |       |       |       |

### Barriers unique to certain vulnerable groups

Indigenous; prisoner; mentally ill, homeless, and at risk youth reported unique barriers to smoking cessation. Racism, historical factors (74, 75, 85), ceremonial use of tobacco (72, 73, 82, 85, 86), cultural values that promote sharing, kinship, and reciprocity (83), cultural values of pride, independence and self-reliance that affect help seeking behaviour (81, 82), cultural values concerning health and privacy (84), and maintenance of cultural identity (73-75, 82, 83, 85) were identified as barriers within Indigenous groups. Smoking cessation could therefore exclude an individual from fully participating in their culture or potentially challenge family, personal or community relationships.

1  
2  
3 Living environments and the stressful context of prison presented unique barriers for  
4  
5 prisoners, including social isolation, anxiety regarding legal matters, transfers to other  
6  
7 prisons, use of cigarettes as a currency, use of cigarettes as a way to reward or punish  
8  
9 behaviour, bullying, missing family and restricted movement throughout the day (110).  
10

11 Low levels of motivation (92, 94, 97, 98), concerns about ability of cessation services  
12  
13 to handle mental health issues (91, 93, 96), identity and belonging (93, 94, 98) and symptom  
14  
15 management (88-98) were barriers for people with mental illness.  
16  
17

18 Competing needs and prioritising need to find shelter/place to live were unique  
19  
20 barriers for individual who were homeless (108). Very high levels of accessibility of  
21  
22 cigarettes, and the regular practice of selling cigarettes to those under 18 years of age were  
23  
24 identified by one study with at risk youth as a unique barrier (104).  
25  
26  
27  
28  
29  
30  
31  
32  
33  
34  
35  
36  
37  
38  
39  
40  
41  
42  
43  
44  
45  
46  
47  
48  
49  
50  
51  
52  
53  
54  
55  
56  
57  
58  
59  
60

Table 4. A summary of the barriers to smoking cessation – reported prevalence of each barrier by vulnerable group for studies using quantitative and mixed methods<sup>ab</sup>.

| Barrier                                 | Reported prevalence of each barrier N/Total N (%) |                                   |                                                                                                                                     |                              |                         |
|-----------------------------------------|---------------------------------------------------|-----------------------------------|-------------------------------------------------------------------------------------------------------------------------------------|------------------------------|-------------------------|
|                                         | Low SES groups (n = 1)                            | Indigenous groups (n = 1)         | People with a mental illness (n = 3)                                                                                                | Homeless groups (n = 2)      | Prisoner groups (n = 1) |
| <b>Individual and lifestyle factors</b> |                                                   |                                   |                                                                                                                                     |                              |                         |
| Stress management                       |                                                   | 63/130 (48) <sup>(79)</sup>       | 30/78 (39) <sup>(104)</sup>                                                                                                         | 82/186 (44) <sup>(107)</sup> |                         |
| Relaxation                              | 261/500 (52) <sup>(60)</sup>                      | 22/130 (17) <sup>(79)</sup>       | 13/30 (42) <sup>(100)</sup><br>7/72 (10) <sup>(88)</sup>                                                                            |                              |                         |
| Enjoyment                               |                                                   | 33/130 (25) <sup>(79)</sup>       | 34/72 (47) <sup>(88)</sup><br>21/105 (20) <sup>(90)</sup><br>30/78 (39) <sup>(104)</sup>                                            |                              |                         |
| Addiction                               | 431/500 (86) <sup>(60)</sup>                      | 51/130 (39) <sup>(79)</sup>       | 56 (53) <sup>(90)</sup><br>10/30 (33) <sup>(100)</sup>                                                                              | 93/186 (50) <sup>(107)</sup> |                         |
| Cravings                                |                                                   |                                   | 53/78 (68) <sup>(104)</sup><br>47/96 (48) <sup>(101)</sup>                                                                          |                              |                         |
| Withdrawal symptoms                     |                                                   |                                   | 85/96 (87) <sup>(101)</sup>                                                                                                         |                              |                         |
| Habit                                   | 411/500 (82) <sup>(60)</sup>                      | 95/130 (73) <sup>(79)</sup>       | 26/72 (36) <sup>(88)</sup><br>20/105 (19) <sup>(90)</sup><br>17/30 (58) <sup>(100)</sup>                                            |                              |                         |
| Perceived Mental Health Benefits        |                                                   | 6 – 30/130 (5-23) <sup>(79)</sup> | 21/105 (20) <sup>(90)</sup><br>7 – 8/72 (10-11) <sup>(88)</sup><br>41/78 (53) <sup>(104)</sup><br>41-76/96 (42-78) <sup>(101)</sup> |                              |                         |
| Concentration                           |                                                   |                                   | 27-56/96 (28-55) <sup>(101)</sup>                                                                                                   |                              |                         |
| Low levels of motivation                | 131/350 (38) <sup>(70)</sup>                      |                                   | 46/96 (47) <sup>(101)</sup>                                                                                                         |                              |                         |
| Weight gain                             | 69/350 (20) <sup>(70)</sup>                       | 6/130 (5) <sup>(79)</sup>         | 3/72 (4) <sup>(88)</sup><br>39/96 (40) <sup>(101)</sup>                                                                             | 38/186 (20) <sup>(107)</sup> |                         |
| Other substance use                     |                                                   |                                   | 3/72 (4) <sup>(88)</sup><br>2-8/78 (3-10) <sup>(104)</sup>                                                                          |                              |                         |

|                                                    |                                           |                             |                                                            |                                                              |                            |
|----------------------------------------------------|-------------------------------------------|-----------------------------|------------------------------------------------------------|--------------------------------------------------------------|----------------------------|
|                                                    |                                           |                             | 13-40/96<br>(13-41) <sup>(101)</sup>                       |                                                              |                            |
| Problems getting to sleep                          |                                           |                             | 23/96 (23)<br>(101)                                        |                                                              |                            |
| Low confidence and perceived difficulty            | 87 - 202/350<br>(25 - 58) <sup>(70)</sup> |                             | 22/78<br>(24) <sup>(104)</sup>                             |                                                              | 25/34 (74)<br>(109)        |
| <b>Social and community networks</b>               |                                           |                             |                                                            |                                                              |                            |
| High prevalence and acceptability in the community | 332/500 (66)<br>(60)                      | 5/130 (12) <sup>(79)</sup>  | 13/105 (13)<br>(90)                                        | 78/186 (42)<br>(107)                                         | 27/34 (79)<br>(109)        |
|                                                    | 116/350 (33)<br>(70)                      |                             | 5/72 (7) <sup>(88)</sup><br>34/78<br>(43) <sup>(104)</sup> |                                                              |                            |
| Lack of social support                             | 90/350 (26)<br>(70)                       |                             |                                                            | 48/186 (26)<br>(107)<br>70-79/98<br>(71-79) <sup>(106)</sup> | 10/34 (29)<br>(109)        |
| Lack of health and other professional support      |                                           |                             | 3/72 (4) <sup>(88)</sup>                                   |                                                              | 19/34 (56)<br>(109)        |
| Social activity                                    |                                           | 44/130 (34) <sup>(79)</sup> | 17/30 (58)<br>(100)<br>2/72 (3) <sup>(88)</sup>            |                                                              |                            |
| Availability of cigarettes                         |                                           | 5/130 (4) <sup>(79)</sup>   | 8/105 (8) <sup>(90)</sup><br>5/72 (7) <sup>(88)</sup>      |                                                              |                            |
| <b>Living and working conditions</b>               |                                           |                             |                                                            |                                                              |                            |
| Access to quit resources                           | 108/350<br>(31) <sup>(70)</sup>           |                             |                                                            |                                                              | 9/34 (27) <sup>(109)</sup> |
| Boredom                                            | 242/500 (48)<br>(60)                      | 38/130 (29) <sup>(79)</sup> | 9/72 (13) <sup>(88)</sup><br>13/105 (13)<br>(90)           |                                                              |                            |
| Stressful factors                                  |                                           |                             | 4/72 (6) <sup>(88)</sup>                                   |                                                              |                            |
| Living environments                                |                                           |                             |                                                            |                                                              | 20 (59) <sup>(109)</sup>   |

<sup>a</sup> Decimals rounded to nearest whole number where appropriate.

<sup>b</sup> Numerators/denominators are presented first, followed by proportion (in parentheses), followed by reference.

## DISCUSSION

This is the first systematic review reporting perceived barriers to smoking cessation across a range of vulnerable groups. The findings from 54 qualitative, eight quantitative and three mixed methods studies demonstrate that barriers to quitting smoking operate at multiple levels including individual and lifestyle factors; social and community networks; living conditions; and cultural and socioeconomic factors. These include: smoking for stress management; enjoyment of smoking; addiction to nicotine; habit; social acceptability of smoking; lack of support to quit and access to quit resources; boredom; stressful life factors; pro-smoking living environments; cultural norms and socioeconomic disadvantage. Stress management, lack of support from health professionals and other service providers and the high prevalence and acceptability of smoking in communities were the three barriers common across all six vulnerable groups included in this review. The identification of perceived barriers common across vulnerable groups is an extension of the previous literature.

The identified barriers broadly reflect those reported in two systematic reviews limited to pregnant smokers (47) and Indigenous Australian pregnant smokers (31) and two critical reviews providing summaries of the challenges to cessation amongst low income smokers (32) and low income; rural; homeless; hard core; immigrant and HIV positive smokers (48). Addiction to nicotine, habit, stress management, enjoyment and weight gain are typically reported barriers to smoking cessation within the general population (25-27, 114). No studies were found that directly compared barriers experienced by vulnerable groups and smokers in the general population. To the authors knowledge, only one study has assessed the effect of socioeconomic position on barriers to quitting smoking and identified that decreasing SEP was associated with higher likelihood of reporting stress management and boredom as barriers (27). This review did not aim to provide direct comparisons between vulnerable groups and the general population due to the heterogeneity of studies.

1  
2  
3 Additionally, comparisons by gender were beyond the scope of this review, but should be  
4  
5 considered for further research, as socioeconomic disadvantage has differential effects on  
6  
7 males and females (19) and preliminary evidence suggests barriers to cessation may differ by  
8  
9 gender (27, 70).  
10

11  
12 Nevertheless, the novel results of this review indicate that vulnerable smokers report a  
13  
14 number of additional barriers to cessation that operate within their social and community  
15  
16 networks; living conditions; and wider cultural and socioeconomic contexts. Social and  
17  
18 community barriers include: lack of support to quit from both peers and health and other  
19  
20 professionals; high prevalence and acceptability of smoking within vulnerable communities  
21  
22 and smoking as a social activity. Living conditions include: stressful factors; pro-smoking  
23  
24 living and working circumstances; lack of access to quit resources; social and geographical  
25  
26 isolation and boredom. Cultural norms and socioeconomic disadvantage also presented  
27  
28 barriers to quitting.  
29  
30  
31  
32  
33

### 34 **Main barriers identified across all vulnerable groups**

#### 35 *Stress management*

36  
37 Stress management was a frequently reported individual level barrier. Smokers  
38  
39 typically demonstrate higher levels of stress and low mood than non-smokers and ex-smokers  
40  
41 (115-117). Smoking may provide a coping mechanism for individuals who are prone to  
42  
43 higher levels of stress (118-120) or smoking may act as a stressor due to neurobiological  
44  
45 processes or through the experience of withdrawal symptoms (120). Stressors associated with  
46  
47 vulnerable groups (for example unemployment, financial stress, and poverty) may compound  
48  
49 stress levels within vulnerable groups. Given that vulnerable smokers may be more likely to  
50  
51 report smoking in order to relieve stress (27) incorporating stress management techniques  
52  
53 into interventions targeted at vulnerable groups may help to increase cessation.  
54  
55  
56  
57  
58  
59  
60

1  
2  
3 *Lack of support to quit from health professionals and other service providers*  
4

5 At the social and community level, a lack of support to quit from health professionals  
6 and other service providers was identified. This reflects research that suggests smokers from  
7 low SEP are less likely to receive advice to quit from a healthcare provider than their more  
8 higher SEP counterparts (121), despite evidence demonstrating brief advice can increase the  
9 likelihood of successful quitting (122, 123). Both organisational and individual factors affect  
10 the provision of quit advice by health and other service providers. These include lack of time,  
11 confidence, knowledge and counselling skills (124). Efforts should be focussed on improving  
12 health professionals' ability to offer quit advice and may benefit from examining how best to  
13 ensure compliance to existing guidelines that provide clear recommendations on identifying  
14 individuals who are at higher risk of smoking and addressing the unique issues that these  
15 individuals face.  
16  
17  
18  
19  
20  
21  
22  
23  
24  
25  
26  
27  
28

29 Tailoring interventions to the specific needs of vulnerable groups may be effective.  
30 Tailored interventions for behaviour change have been found to be effective compared to no  
31 intervention or dissemination of guidelines or educational materials alone [92]. Given that  
32 this review identified three common barriers across the six vulnerable groups include in this  
33 review, we argue that subsequent smoking cessation interventions in vulnerable groups  
34 should seek to address these factors. Programs should include specific modules on stress  
35 management techniques and how best to combat stress in vulnerable groups as well as  
36 educating smokers about how stress relief and relief from nicotine withdrawal symptoms can  
37 be confounded.  
38  
39  
40  
41  
42  
43  
44  
45  
46  
47  
48

49 Smoking cessation interventions should be designed to maximise participation by  
50 vulnerable groups, addressing the key barriers around acceptability and access to  
51 interventions. Utilising existing services and organisations that are highly accessed by  
52 vulnerable groups and are a trusted source of help for vulnerable groups is also necessary.  
53  
54  
55  
56  
57  
58  
59  
60

1  
2  
3 There is accumulating evidence that social and community service organisations (SCSOs) are  
4 well placed to provide brief smoking cessation advice to highly vulnerable clients (125, 126).  
5  
6

### 7 *High prevalence and acceptability of smoking*

8  
9 The high prevalence and social acceptability of smoking within vulnerable  
10 communities was frequently reported. Considerable measures have been taken to address the  
11 denormalisation of smoking in the general population through regulation and legislative  
12 changes such as restrictions in advertising, smoke-free environment policies and point of sale  
13 restriction (1, 127, 128). Participants who were homeless, experiencing mental illness and  
14 prisoners cited a lack of restrictions on smoking within their living environments (or lack of  
15 enforcement of existing policies) as a factor that reinforced their smoking. While there are  
16 challenges associated with their implementation, smoke free areas can be successfully  
17 implemented within mental health treatment centres and prisons (129-131) and there is  
18 potential to extend these restrictions to homeless shelters and public housing developments.  
19  
20  
21  
22  
23  
24  
25  
26  
27  
28  
29  
30  
31

32 Efforts to encourage the denormalisation of smoking in the environments of  
33 vulnerable communities require further exploration. Providing access to acceptable and  
34 effective behavioural and pharmacological supports should ensure that denormalisation does  
35 not result in compounding stigma and further isolating vulnerable groups (127, 132).  
36  
37  
38  
39

### 40 **Barriers specific to certain groups**

#### 41 *Indigenous groups*

42  
43 Indigenous groups identified unique stressors linked to smoking including racism and  
44 historical factors; cultural practices including ceremonial use of tobacco and cultural values  
45 that promote sharing, kinship and reciprocity and the importance of smoking as a way to  
46 maintain cultural identity. Cultural values also had effects on the willingness of Indigenous  
47 participants to access smoking support services. Certain Indigenous groups may be less likely  
48 to receive advice to quit or engage with services designed to aid in cessation (133). However,  
49  
50  
51  
52  
53  
54  
55  
56  
57  
58  
59  
60



1  
2  
3 it is important to note that smoking cessation programs have been shown to be effective  
4 within Indigenous groups (113, 134). Culturally appropriate interventions tailored to the  
5 needs of Indigenous smokers should continue to be developed, implemented and evaluated.  
6  
7 These programs should acknowledge the cultural significance of tobacco use and the  
8 important historical and social factors associated with Indigenous groups and smoking (135).

#### 14 *Prisoners*

16 Prisoners identified unique stressors within their living conditions that contributed to  
17 their smoking including social isolation, anxiety regarding legal matters and transfers to other  
18 prisons. A recent multicomponent randomised controlled trial that included improving stress  
19 management skills in prisoners found similar point prevalence abstinence rates as another  
20 trial conducted with prisoners (9) and other community based studies (136, 137). Thus,  
21 smoking cessation programs can be effective even in prison environments that are highly  
22 conducive to smoking and should form a part of routine care within prison systems.  
23  
24  
25  
26  
27  
28  
29  
30

#### 31 *People with a mental illness*

34 Low motivation to quit smoking was only reported in studies involving smokers with  
35 a mental illness. This contradicts research showing no difference in motivation to quit  
36 between those with severe mental illness and the general population (138). A recent review  
37 concluded there is some evidence to suggest that individuals diagnosed with a psychotic  
38 disorder are slightly less motivated to quit than those diagnosed with depression (138).  
39 Possible reasons for this include the symptoms associated with schizophrenia (including  
40 amotivation), management of side effects of medications (including Parkinsonism), limited  
41 support systems, low perceived vulnerability to smoking related disease, lack of alternate  
42 coping mechanisms and poverty (138, 139). Information on the diagnoses of participants was  
43 only reported in one of the studies reporting motivation as a barrier in this review (92) where  
44 the majority of participants were diagnosed with a psychotic disorder. However, other studies  
45  
46  
47  
48  
49  
50  
51  
52  
53  
54  
55  
56  
57  
58  
59  
60

1  
2  
3 did not provide information on participants' diagnoses and further exploration is beyond the  
4  
5 scope of this review.  
6

7  
8 Symptom management also presented a significant barrier within studies concerning  
9  
10 people with a mental illness. There is evidence to suggest that biochemical processes between  
11  
12 nicotine and other substances in tobacco improve some symptoms of mental illness (139).  
13  
14 Additionally, smokers with a mental illness may be more likely to misattribute their  
15  
16 withdrawal symptoms as recurring mental illness symptoms. Further investigation and  
17  
18 education regarding cessation and symptom management with people with a mental illness is  
19  
20 warranted. Integrating smoking cessation care with mental health and addiction treatments  
21  
22 can be effective at promoting cessation rates in groups with mental illness (20, 30). However,  
23  
24 future studies need to investigate ways to maintain long term smoking cessation as well as  
25  
26 systems-level changes that may support smoking cessation in people with mental illness (131,  
27  
28 140).  
29  
30

### 31 32 **Barriers to smoking cessation in vulnerable groups: a model**

33  
34 Figure 2 visually demonstrates the broad range of barriers to cessation reported by vulnerable  
35  
36 groups, many of which exist outside of the realm of the individual. This model demonstrates  
37  
38 the interconnectedness of individual and lifestyle factors with the wider social and  
39  
40 community factors, living conditions and cultural, socioeconomic and environmental factors.  
41  
42 The two darker spheres holding social and community networks and individual and lifestyle  
43  
44 factors identify those factors that are potentially modifiable through short term health  
45  
46 behaviour change interventions. This model does not provide an exhaustive list of all of the  
47  
48 factors that prevent vulnerable individuals from smoking cessation. It does provide a  
49  
50 framework for understanding the perceived self-reported barriers to quitting smoking  
51  
52 identified in this review.  
53  
54  
55  
56  
57  
58  
59  
60

### Strengths and limitations

This synthesis of the literature provides evidence of the perceived barriers to smoking cessation by examining the methodological quality of studies and comparing between and within selected vulnerable groups. However, this review has some limitations. While the overall quality of the studies included in this review was acceptable, most qualitative studies failed to provide information regarding the trustworthiness of the research and most quantitative studies failed to provide information on the validity and reliability of the measures used to assess barriers. Of quantitative studies included, the majority used convenience samples. It is not generally feasible to target vulnerable and hard to reach populations using random population sampling procedures. This limits the generalizability and transferability of the included studies to wider vulnerable populations. Nevertheless, the agreement in findings between qualitative studies does suggest that these results are robust.

The nature of the studies included in this review means that no weight is given to the different barriers and the authors cannot provide comment on which, if any, barriers should be made a priority to target in smoking cessation interventions with vulnerable groups. Given limited resources and funds, addressing all barriers is rarely possible. Future research is needed to identify those barriers which are most important to address first and to prioritise resourcing and intervention development.

The results of this review were broadly categorised according to the SDHF, however these categories are not mutually exclusive and certain barriers were able to be included in multiple categories (for example stress and stressful factors could be categorised as either individual level barriers or barriers within the living conditions level). The reviewed studies do not directly clarify whether the nature of stress experienced in vulnerable groups is personal or contextual. Constructs such as coping and resilience (140, 141) have been hypothesised as mediators between stress and smoking in low socioeconomic groups (142).

1  
2  
3 Similarly, as this review sought to provide a summary of vulnerable smokers'  
4  
5 perceived self-reported barriers to cessation, other barriers which may be important  
6  
7 determinants of quit attempts and success were not considered. Barriers such as the  
8  
9 knowledge and attitudes of staff and health professionals and the capacity of services to offer  
10  
11 smoking cessation programs, which have been identified within the literature (124), should  
12  
13 also be considered when examining the challenges facing vulnerable groups.  
14  
15

16  
17 This review was only able to identify four studies that examined the barriers to  
18  
19 quitting smoking within prisoner (n=2 studies) and homeless (n=2) groups and one study  
20  
21 focussing on at-risk youth. These results indicate more research is required with these groups  
22  
23 to examine the barriers to smoking cessation. More studies investigating the barriers to  
24  
25 cessation within these groups may lead to identification of additional common and unique  
26  
27 barriers across vulnerable groups. Additionally, this review was limited to studies conducted  
28  
29 within one of six vulnerable groups. Other groups that show high rates of smoking include  
30  
31 lesbian, gay, bisexual and transgender groups (143); culturally and linguistically diverse  
32  
33 groups (144); and rural and remote communities (145). The authors acknowledge the  
34  
35 disparity in smoking prevalence in these groups, however their inclusion would have  
36  
37 increased the breadth of the review to a level that would be too broad and complex to be  
38  
39 useful. These groups may experience barriers to cessation different to those experienced by  
40  
41 the groups included in this review. It should also be noted that individuals within the included  
42  
43 groups often experience multiple forms of disadvantage for example people who are  
44  
45 homeless are more likely to experience a mental illness (146) and Indigenous communities  
46  
47 are more likely to be overrepresented in lower socioeconomic positions (3).  
48  
49  
50

## 51 **Conclusions**

52  
53  
54 These results support findings that vulnerable groups experience common barriers to  
55  
56 smoking cessation, and also barriers which are unique to specific vulnerable groups. Stress  
57  
58  
59  
60

1  
2  
3 management, high prevalence and acceptability of smoking and lack of support to quit were  
4 identified as priority areas for cessation research, program implementation and policy change.  
5  
6 Many of the barriers identified within this review are modifiable through short term health  
7  
8 behaviour change strategies. For heterogeneous groups of vulnerable individuals, intervention  
9  
10 development should seek to address those barriers common to all vulnerable groups identified  
11  
12 in this review. For relatively homogenous groups of vulnerable individuals, interventions  
13  
14 should seek to address the unique barriers faced by those groups in addition to those barriers  
15  
16 identified as common to all vulnerable groups.  
17  
18  
19

20  
21 These findings, coupled with lower success rates in quitting within vulnerable groups  
22  
23 relative to the success rates in more advantaged groups (13, 147), suggest that interventions  
24  
25 with vulnerable groups need to address wider social, community and cultural factors as well  
26  
27 as individualised cessation support. Addressing the predictors of cessation found within the  
28  
29 general population such as nicotine dependence and enjoyment remain important for  
30  
31 vulnerable groups.  
32  
33  
34  
35

### 36 **Acknowledgements:**

37  
38 We are grateful to Research Assistant (RA) Ms Madeleine Randell and to Dr Michelle  
39  
40 Anderson for providing valuable comment on draft manuscripts.  
41  
42

43 **Contributorship statement:** All authors conceived the initial scope and subject of the  
44  
45 review. LT carried out all searches, wrote up drafts and performed quality assessment. BB,  
46  
47 CP and JB provided extensive feedback and contributions to drafts of the paper. All authors  
48  
49 completed quality assessment of the included papers. BB and LT completed narrative  
50  
51 synthesis. All authors have read and met the ICMJE criteria for authorship.  
52  
53

54 **Competing interests:** All authors have completed the Unified Competing Interest Form at  
55  
56 [www.icmje.org/coi\\_disclosure.pdf](http://www.icmje.org/coi_disclosure.pdf) (available on request from the corresponding author) and declare  
57  
58  
59  
60

1  
2  
3 that: no support from any organisation for the submitted work; no financial relationships with any  
4  
5 organisations that might have an interest in the submitted work in the previous three years; no other  
6  
7 relationships or activities that could appear to have influenced the submitted work.  
8

9 **Funding:** BB is supported by a Cancer Institute NSW Career Development Fellowship and a  
10  
11 University of Newcastle Faculty of Health and Medicine Gladys M Brawn Career Development  
12  
13 Fellowship. JB is supported by an Australian Research Council Post-Doctoral Industry Fellowship.  
14  
15 CP is supported by Newcastle Cancer Control Collaborative funding. LT is supported by a 50:50  
16  
17 scholarship from the University of Newcastle Faculty of Health and Medicine and the Cancer Institute  
18  
19 NSW.  
20

21 **Data sharing:** There are no additional data available.  
22  
23  
24  
25  
26  
27  
28  
29  
30  
31  
32  
33  
34  
35  
36  
37  
38  
39  
40  
41  
42  
43  
44  
45  
46  
47  
48  
49  
50  
51  
52  
53  
54  
55  
56  
57  
58  
59  
60

## REFERENCES

1. World Health Organization (WHO). WHO report on the Global Tobacco Epidemic. Geneva: 2008.
2. Australian Institute of Health and Welfare (AIHW). 2010 National Drug Strategy Household Survey: Detailed findings. Canberra: 2010 Contract No.: Cat. no. PHE145.
3. Australian Institute of Health and Welfare. The health and welfare of Australia's Aboriginal and Torres Strait Islander people, an overview 2011. Canberra: 2011 Contract No.: Cat. no. IHW 42.
4. Centers for Disease Control Prevention (CDCP). Current cigarette smoking among adults - United States, 2011. *MMWR Morb Mortal Wkly Rep.* 2012;61(44):889-94. Epub 2012/11/09.
5. Statistics Canada. Canadian Community Health Survey 2000/01 Ottawa: Statistics Canada, 2001.
6. Lawrence D, Mitrou F, Zubrick SR. Smoking and mental illness: results from population surveys in Australia and the United States. *BMC Public Health.* 2009;9:285. Epub 2009/08/12.
7. Kelly P, Baker AL, Deane FP, Kay-Lambkin FJ, Bonevski B, Tregarthen J. Prevalence of smoking and other health risk factors in people attending residential substance abuse treatment. *Drug Alcohol Rev.* 2012;31(5):638-44. doi: 10.1111/j.1465-3362.2012.00465.x. Epub 2012 May 30.
8. Baggett TP, Rigotti NA. Cigarette smoking and advice to quit in a national sample of homeless adults. *Am J Prev Med.* 2010;39(2):164-72. Epub 2010/07/14.
9. Cropsey K, Eldridge G, Weaver M, Villalobos G, Stitzer M, Best A. Smoking cessation intervention for female prisoners: addressing an urgent public health need. *Am J Public Health.* 2008;98(10):1894-901. Epub 2008/08/16.
10. Indig D, Topp L, Ross B, Mamoon H, Border B, Kumar S, et al. 2009 NSW Inmate Health Survey: Key Findings Report Sydney: Justice Health, 2010.
11. McLachlan R, Gilfillan G, Gordon J. Deep and Persistent Disadvantage in Australia. Canberra: 2013.
12. Hyland A, Borland R, Li Q, Yong HH, McNeill A, Fong GT, et al. Individual-level predictors of cessation behaviours among participants in the International Tobacco Control (ITC) Four Country Survey. *Tob Control.* 2006;15 Suppl 3:iii83-94. Epub 2006/06/07.
13. Kotz D, West R. Explaining the social gradient in smoking cessation: it's not in the trying, but in the succeeding. *Tob Control.* 2009;18(1):43-6.
14. Gilman SE, Martin LT, Abrams DB, Kawachi I, Kubzansky L, Loucks EB, et al. Educational attainment and cigarette smoking: a causal association? *Int J Epidemiol.* 2008;37(3):615-24. Epub 2008/01/09.
15. Hatziafreu EJ, Pierce JP, Lefkopoulou M, Fiore MC, Mills SL, Novotny TE, et al. Quitting smoking in the United States in 1986. *J Natl Cancer Inst.* 1990;82(17):1402-6. Epub 1990/09/05.
16. Levy DT, Romano E, Mumford E. The relationship of smoking cessation to sociodemographic characteristics, smoking intensity, and tobacco control policies. *Nicotine Tob Res.* 2005;7(3):387-96. Epub 2005/08/09.
17. Reid JL, Hammond D, Boudreau C, Fong GT, Siahpush M, Collaboration ITC. Socioeconomic disparities in quit intentions, quit attempts, and smoking abstinence among smokers in four western countries: findings from the International Tobacco Control Four Country Survey. *Nicotine Tob Res.* 2010;12 Suppl:S20-33. Epub 2010/10/15.
18. Giskes K, van Lenthe FJ, Turrell G, Brug J, Mackenbach JP. Smokers living in deprived areas are less likely to quit: a longitudinal follow-up. *Tob Control.* 2006;15(6):485-8. Epub 2006/11/30.
19. Graham H, Inskip HM, Francis B, Harman J. Pathways of disadvantage and smoking careers: evidence and policy implications. *J Epidemiol Community Health.* 2006;60 Suppl 2:7-12. Epub 2007/08/22.
20. Hiscock R, Bauld L, Amos A, Fidler JA, Munafo M. Socioeconomic status and smoking: a review. *Ann N Y Acad Sci.* 2012;1248:107-23. Epub 2011/11/19.
21. Melnyk KA. Barriers: a critical review of recent literature. *Nurs Res.* 1988;37(4):196-201. Epub 1988/07/01.

22. Dahlgren G, & Whitehead, M. . Policies and strategies to promote equity in health. Copenhagen: 1992.
23. Marmot M. Social determinants of health inequalities. *Lancet*. 2005;365(9464):1099-104. Epub 2005/03/23.
24. Theobald W, Smith, SS., Fiore, M. . Insights: Smoking in Wisconsin. University of Wisconsin Medical School: UW Center for Tobacco Research and Intervention, 2002.
25. Guirguis AB, Ray SM, Zingone MM, Airee A, Franks AS, Keenum AJ. Smoking cessation: barriers to success and readiness to change. *Tenn Med*. 2010;103(9):45-9. Epub 2010/12/09.
26. Orleans CT, Jepson C, Resch N, Rimer BK. Quitting motives and barriers among older smokers. The 1986 Adult Use of Tobacco Survey revisited. *Cancer*. 1994;74(7 Suppl):2055-61. Epub 1994/10/01.
27. Fidler JA, West R. Self-perceived smoking motives and their correlates in a general population sample. *Nicotine Tob Res*. 2009;11(10):1182-8. Epub 2009/07/31.
28. Poland B, Frohlich K, Haines RJ, Mykhalovskiy E, Rock M, Sparks R. The social context of smoking: the next frontier in tobacco control? *Tob Control*. 2006;15(1):59-63. Epub 2006/01/27.
29. Paul CL, Ross S, Bryant J, Hill W, Bonevski B, Keevy N. The social context of smoking: A qualitative study comparing smokers of high versus low socioeconomic position. *BMC Public Health*. 2010;10:211. Epub 2010/04/28.
30. Rodriguez D, Carlos HA, Adachi-Mejia AM, Berke EM, Sargent JD. Predictors of tobacco outlet density nationwide: a geographic analysis. *Tob Control*. 2013;22(5):349-55. Epub 2012/04/12.
31. Gould GS, Munn J, Watters T, McEwen A, Clough AR. Knowledge and views about maternal tobacco smoking and barriers for cessation in Aboriginal and Torres Strait Islanders: A systematic review and meta-ethnography. *Nicotine Tob Res*. 2013;15(5):863-74. Epub 2012/10/09.
32. Gollust SE, Schroeder SA, Warner KE. Helping smokers quit: understanding the barriers to utilization of smoking cessation services. *Milbank Q*. 2008;86(4):601-27. Epub 2009/01/06.
33. Wiebel WW. Identifying and gaining access to hidden populations. *NIDA Res Monogr*. 1990;98:4-11. Epub 1990/01/01.
34. Australian National Preventive Health Agency. A priority-driven research agenda for tobacco control in Australia. 2013.
35. World Health Organisation. Report on the global tobacco epidemic, 2013. 2013.
36. U.S. Department of Health and Human Services. Ending the tobacco Epidemic: A tobacco control strategic action plan for the U.S. Department of Health and Human Services. In: Office of the Assistant Secretary for Health, editor. Washington, DC. November, 2010. .
37. Moher D, Liberati A, Tetzlaff J, Altman DG, Group P. Preferred reporting items for systematic reviews and meta-analyses: the PRISMA statement. *PLoS Med*. 2009;6(7):e1000097. Epub 2009/07/22.
38. Tong A, Flemming K, McInnes E, Oliver S, Craig J. Enhancing transparency in reporting the synthesis of qualitative research: ENTREQ. *BMC Med Res Methodol*. 2012;12:181. Epub 2012/11/29.
39. Carson KV, Brinn MP, Peters M, Veale A, Esterman AJ, Smith BJ. Interventions for smoking cessation in Indigenous populations. *Cochrane Database Syst Rev*. 2012;1:CD009046. Epub 2012/01/20.
40. Cunningham C, Stanley F. Indigenous by definition, experience, or world view. *BMJ*. 2003;327(7412):403-4. Epub 2003/08/23.
41. Letts L, Wilkins S, Stewart D, Bosch J, Westmorland M. Critical Review Form - Qualitative Studies (Version 2.0). McMaster University; 2007; Available from: <http://www.fhs.mcmaster.ca/rehab/ebp/>.
42. Barley EA, Murray J, Walters P, Tylee A. Managing depression in primary care: A meta-synthesis of qualitative and quantitative research from the UK to identify barriers and facilitators. *BMC Fam Pract*. 2011;12:47. Epub 2011/06/11.
43. O'Cathain A, Murphy E, Nicholl J. The quality of mixed methods studies in health services research. *J Health Serv Res Policy*. 2008;13(2):92-8. Epub 2008/04/18.



- 1  
2  
3 44. Popay J, Roberts H, Sowden A, Petticrew M, Arai L, Rodgers M, et al. Guidance on the  
4 Conduct of Narrative Synthesis in Systematic Reviews. 2006.  
5 45. Rumrill Jr PD, Fitzgerald SM. Using narrative literature reviews to build a scientific knowledge  
6 base. *Work*. 2001;16(2):165-70. Epub 2002/11/21.  
7 46. Denyer D, & Tranfield, D. Using qualitative research synthesis to build an actionable  
8 knowledge base. *Manage Decis*. 2006;44(2):213-27.  
9 47. Ingall G, Cropley M. Exploring the barriers of quitting smoking during pregnancy: a  
10 systematic review of qualitative studies. *Women Birth*. 2010;23(2):45-52. Epub 2009/11/03.  
11 48. Browning K, Baker, CJ., McNally, GA., Wewers, ME. . Nursing research in tobacco use and  
12 special populations. *Annu Rev Nurs Res*. 2009;27:319-42.  
13 49. Ahijevych K, Kuun P, Christman S, Wood T, Browning K, Wewers ME. Beliefs about tobacco  
14 among Appalachian current and former users. *Appl Nurs Res*. 2003;16(2):93-102. Epub 2003/05/24.  
15 50. Bancroft A, Wiltshire S, Parry O, Amos A. "It's like an addiction first thing...afterwards it's like  
16 a habit": daily smoking behaviour among people living in areas of deprivation. *Soc Sci Med*.  
17 2003;56(6):1261-7. Epub 2003/02/26.  
18 51. Beech BM, Scarinci IC. Smoking attitudes and practices among low-income African-  
19 Americans: qualitative assessment of contributing factors. *Am J Health Promot*. 2003;17(4):240-8.  
20 Epub 2003/03/19.  
21 52. Bryant J, Bonevski B, Paul C, O'Brien J, Oakes W. Developing cessation interventions for the  
22 social and community service setting: a qualitative study of barriers to quitting among  
23 disadvantaged Australian smokers. *BMC Public Health*. 2011;11:493. Epub 2011/06/28.  
24 53. Copeland L. An exploration of the problems faced by young women living in disadvantaged  
25 circumstances if they want to give up smoking: can more be done at general practice level? *Fam*  
26 *Pract*. 2003;20(4):393-400. Epub 2003/07/24.  
27 54. Dunn CL, Pirie PL, Lando HA. Attitudes and perceptions related to smoking among pregnant  
28 and postpartum women in a low-income, multiethnic setting. *Am J Health Promot*. 1998;12(4):267-  
29 74. Epub 1998/02/06.  
30 55. Franco L, Welsby D, Eccleston P, Furber S. A qualitative study about smoking cessation with  
31 clients of community service organisations that work with disadvantaged families. *Health Promot J*  
32 *Austr*. 2011;22(2):153-5. Epub 2011/08/09.  
33 56. Lacey LP, Manfredi C, Balch G, Warnecke RB, Allen K, Edwards C. Social support in smoking  
34 cessation among black women in Chicago public housing. *Public Health Rep*. 1993;108(3):387-94.  
35 57. Moffatt J, Whip R, Moffatt J. The Struggle to Quit: Barriers and Incentives to Smoking  
36 Cessation. *Health Educ J*. 2004;63(2):101-12.  
37 58. Nichter M, Nichter M, Muramoto M, Adrian S, Goldade K, Tesler L, et al. Smoking among  
38 low-income pregnant women: an ethnographic analysis. *Health Educ Behav*. 2007;34(5):748-64.  
39 Epub 2007/01/04.  
40 59. Peretti-Watel P, Constance J. "It's all we got left". Why poor smokers are less sensitive to  
41 cigarette price increases. *Int J Environ Res Public Health*. 2009;6(2):608-21. Epub 2009/05/15.  
42 60. Price JH, Everett SA. Perceptions of lung cancer and smoking in an economically  
43 disadvantaged population. *J Community Health*. 1994;19(5):361-75. Epub 1994/10/01.  
44 61. Roddy E, Antoniak M, Britton J, Molyneux A, Lewis S. Barriers and motivators to gaining  
45 access to smoking cessation services amongst deprived smokers--a qualitative study. *BMC Health*  
46 *Serv Res*. 2006;6:147. Epub 2006/11/08.  
47 62. Stead M, MacAskill S, MacKintosh AM, Reece J, Eadie D. "It's as if you're locked in":  
48 qualitative explanations for area effects on smoking in disadvantaged communities. *Health Place*.  
49 2001;7(4):333-43. Epub 2001/10/30.  
50 63. Stewart MJ, Brosky G, Gillis A, Jackson S, Johnston G, Kirkland S, et al. Disadvantaged women  
51 and smoking. *Can J Public Health*. 1996;87(4):257-60.  
52 64. Stewart MJ, Gillis A, Brosky G, Johnston G, Kirkland S, Leigh G, et al. Smoking among  
53 disadvantaged women: causes and cessation. *Can J Nurs Res*. 1996;28(1):41-60.  
54  
55  
56  
57  
58  
59  
60

- 1  
2  
3 65. Stewart MJ, Greaves L, Kushner KE, Letourneau NL, Spitzer DL, Boscoe M. Where there is  
4 smoke, there is stress: low-income women identify support needs and preferences for smoking  
5 reduction. *Health Care Women Int.* 2011;32(5):359-83. Epub 2011/04/09.
- 6 66. Stillman FA, Bone L, Avila-Tang E, Smith K, Yancey N, Street C, et al. Barriers to smoking  
7 cessation in inner-city African American young adults. *Am J Public Health.* 2007;97(8):1405-8. Epub  
8 2007/06/30.
- 9 67. Tod AM. Barriers to smoking cessation in pregnancy: a qualitative study. *Br J Community  
10 Nurs.* 2003;8(2):56-64. Epub 2003/02/18.
- 11 68. Tsourtos G, Ward, PR., Muller, R. . Smoking and stress: the double edged sword of living in a  
12 disadvantaged area. *Australasian Medical Journal.* 2008;1(1).
- 13 69. Wiltshire S, Bancroft A, Parry O, Amos A. 'I came back here and started smoking again':  
14 perceptions and experiences of quitting among disadvantaged smokers. *Health Educ Res.*  
15 2003;18(3):292-303. Epub 2003/06/28.
- 16 70. Rosenthal L, Carroll-Scott A, Earnshaw VA, Sackey N, O'Malley SS, Santilli A, et al. Targeting  
17 cessation: understanding barriers and motivations to quitting among urban adult daily tobacco  
18 smokers. *Addict Behav.* 2013;38(3):1639-42. Epub 2012/12/21.
- 19 71. White S, Baird W. Disadvantaged former miners' perspectives on smoking cessation: A  
20 qualitative study. *Health Educ J.* 2013;72(6):755-60.
- 21 72. Burgess D, Fu SS, Joseph AM, Hatsukami DK, Solomon J, van Ryn M. Beliefs and experiences  
22 regarding smoking cessation among American Indians. *Nicotine Tob Res.* 2007;9 Suppl 1:S19-28.  
23 Epub 2007/03/17.
- 24 73. Choi WS, Daley CM, James A, Thomas J, Schupbach R, Segraves M, et al. Beliefs and attitudes  
25 regarding smoking cessation among American Indians: a pilot study. *Ethn Dis.* 2006;16(1):35-40.  
26 Epub 2006/04/08.
- 27 74. Dawson AP, Cargo M, Stewart H, Chong A, Daniel M. Aboriginal health workers experience  
28 multilevel barriers to quitting smoking: a qualitative study. *Int J Equity Health.* 2012;11:27. Epub  
29 2012/05/25.
- 30 75. Dawson AP, Cargo M, Stewart H, Chong A, Daniel M. "I know it's bad for me and yet I do it":  
31 exploring the factors that perpetuate smoking in Aboriginal Health Workers--a qualitative study.  
32 *BMC Health Serv Res.* 2012;12:102. Epub 2012/04/27.
- 33 76. Dennis MK, Momper SL. "It's bad around here now": tobacco, alcohol and other drug use  
34 among American Indians living on a rural reservation. *J Ethn Subst Abuse.* 2012;11(2):130-48. Epub  
35 2012/06/12.
- 36 77. Fernandez C, Wilson D. Maori women's views on smoking cessation initiatives. *Nurs Prax N Z.*  
37 2008;24(2):27-40. Epub 2008/09/25.
- 38 78. Fu SS, Burgess D, van Ryn M, Hatsukami DK, Solomon J, Joseph AM. Views on smoking  
39 cessation methods in ethnic minority communities: a qualitative investigation. *Prev Med.*  
40 2007;44(3):235-40. Epub 2006/12/19.
- 41 79. Glover M. Analysing smoking using Te Whare Tapa Wha. *NZ J Psychol.* 2005;34(1):13-9.
- 42 80. Gould GS, Munn J, Avuri S, Hoff S, Cadet-James Y, McEwen A, et al. "Nobody smokes in the  
43 house if there's a new baby in it": Aboriginal perspectives on tobacco smoking in pregnancy and in  
44 the household in regional NSW Australia. *Women Birth.* 2013;26(4):246-53.
- 45 81. Gryczynski J, Feldman R, Carter-Pokras O, Kanamori M, Chen L, Roth S. Contexts of tobacco  
46 use and perspectives on smoking cessation among a sample of urban American Indians. *J Health  
47 Care Poor Underserved.* 2010;21(2):544-58. Epub 2010/05/11.
- 48 82. Hodge FS, Struthers R. Persistent smoking among Northern Plains Indians: lenient attitudes,  
49 low harm value, and partiality toward cigarette smoking. *J Cult Divers.* 2006;13(4):181-5. Epub  
50 2007/03/07.
- 51 83. Johnston V, Thomas DP. Smoking behaviours in a remote Australian Indigenous community:  
52 the influence of family and other factors. *Soc Sci Med.* 2008;67(11):1708-16. Epub 2008/10/22.
- 53  
54  
55  
56  
57  
58  
59  
60

- 1  
2  
3 84. Kaholokula J, L. BK, Santos JI, Chang HK. Culturally informed smoking cessation strategies for  
4 Native Hawaiians. *Nicotine Tob Res.* 2008;10(4):671-81. Epub 2009/03/21.
- 5 85. Passey ME, Gale JT, Sanson-Fisher RW. "It's almost expected": rural Australian Aboriginal  
6 women's reflections on smoking initiation and maintenance: a qualitative study. *BMC Womens*  
7 *Health.* 2011;11:55. Epub 2011/12/14.
- 8 86. Patten CA, Enoch C, Renner CC, Offord KP, Nevak C, Kelley SF, et al. Focus groups of Alaska  
9 Native adolescent tobacco users: preferences for tobacco cessation interventions and barriers to  
10 participation. *Health Educ Behav.* 2009;36(4):711-23. Epub 2007/12/01.
- 11 87. Wood L, France K, Hunt K, Eades S, Slack-Smith L. Indigenous women and smoking during  
12 pregnancy: knowledge, cultural contexts and barriers to cessation. *Soc Sci Med.* 2008;66(11):2378-  
13 89. Epub 2008/03/04.
- 14 88. Carosella AM, Ossip-Klein DJ, Owens CA. Smoking attitudes, beliefs, and readiness to change  
15 among acute and long term care inpatients with psychiatric diagnoses. *Addict Behav.*  
16 1999;24(3):331-44. Epub 1999/07/10.
- 17 89. Davis K, Brunette M, Vorhies V, Ferron J, Whitley R. A qualitative study of how individuals  
18 with severe mental illness assess smoking risks. *Mental Health and Substance Use.* 2010;3(2):110-23.
- 19 90. Goldberg JO, Moll S, Washington A. Exploring the Challenge of Tobacco Use and  
20 Schizophrenia. *Psychiatric Rehabilitation Skills.* 1996;1(2):55-67.
- 21 91. Howard LM, Bekele D, Rowe M, Demilew J, Bewley S, Marteau TM. Smoking cessation in  
22 pregnant women with mental disorders: a cohort and nested qualitative study. *BJOG.*  
23 2013;120(3):362-70. Epub 2012/11/22.
- 24 92. Kerr S, Woods C, Knussen C, Watson H, Hunter R. Breaking the habit: a qualitative  
25 exploration of barriers and facilitators to smoking cessation in people with enduring mental health  
26 problems. *BMC Public Health.* 2013;13:221. Epub 2013/03/19.
- 27 93. Lawn SJ, Pols RG, Barber JG. Smoking and quitting: a qualitative study with community-living  
28 psychiatric clients. *Soc Sci Med.* 2002;54(1):93-104. Epub 2002/02/01.
- 29 94. Lucksted A, Dixon LB, Sembly JB. A focus group pilot study of tobacco smoking among  
30 psychosocial rehabilitation clients. *Psychiatr Serv.* 2000;51(12):1544-8. Epub 2000/11/30.
- 31 95. Morris CD, Waxmonsky JA, May MG, Giese AA. What do persons with mental illnesses need  
32 to quit smoking? Mental health consumer and provider perspectives. *Psychiatr Rehabil J.*  
33 2009;32(4):276-84. Epub 2009/04/07.
- 34 96. Nawaz S, Frounfelker R, Ferron JC, Carpenter-Song EA, Davis K, Brunette MF. Smoking and  
35 Quitting Beliefs, Attitudes, and Behaviors Among Smokers With Severe Mental Illness From Three  
36 Race/Ethnicity Groups. *Journal of Dual Diagnosis.* 2012;8(3):180-7.
- 37 97. Snyder M, McDevitt J, Painter S. Smoking cessation and serious mental illness. *Arch Psychiatr*  
38 *Nurs.* 2008;22(5):297-304. Epub 2008/09/24.
- 39 98. Solway ES. The lived experiences of tobacco use, dependence, and cessation: insights and  
40 perspectives of people with mental illness. *Health Soc Work.* 2011;36(1):19-32. Epub 2011/03/31.
- 41 99. Tsourtos G, Ward PR, Muller R, Lawn S, Winefield AH, Hersh D, et al. The importance of  
42 resilience and stress to maintaining smoking abstinence and cessation: a qualitative study in  
43 Australia with people diagnosed with depression. *Health Soc Care Community.* 2011;19(3):299-306.  
44 Epub 2010/12/09.
- 45 100. Van Dongen CJ. Smoking and persistent mental illness: an exploratory study. *J Psychosoc*  
46 *Nurs Ment Health Serv.* 1999;37(11):26-34. Epub 1999/11/26.
- 47 101. Asher MK, Martin RA, Rohsenow DJ, MacKinnon SV, Traficante R, Monti PM. Perceived  
48 barriers to quitting smoking among alcohol dependent patients in treatment. *J Subst Abuse Treat.*  
49 2003;24(2):169-74. Epub 2003/05/15.
- 50 102. Clancy N, Zwar N, Richmond R. Depression, smoking and smoking cessation: A qualitative  
51 study. *Fam Pract.* 2013;30(5):587-92.
- 52  
53  
54  
55  
56  
57  
58  
59  
60

103. Prochaska JJ, Fromont SC, Wa C, Matlow R, Ramo DE, Hall SM. Tobacco use and its treatment among young people in mental health settings: A qualitative analysis. *Nicotine Tob Res.* 2013;15(8):1427-35.
104. Orleans CT, Hutchinson D. Tailoring nicotine addiction treatments for chemical dependency patients. *J Subst Abuse Treat.* 1993;10(2):197-208. Epub 1993/03/01.
105. Ratschen E, Britton J, Doody G, McNeill A. Smoking attitudes, behaviour and nicotine dependence among mental health acute inpatients: an exploratory study. *Int J Soc Psychiatry.* 2010;56(2):107-18. Epub 2010/03/09.
106. Arnsten JH, Reid K, Bierer M, Rigotti N. Smoking behavior and interest in quitting among homeless smokers. *Addict Behav.* 2004;29(6):1155-61. Epub 2004/07/09.
107. Connor SE, Cook RL, Herbert MI, Neal SM, Williams JT. Smoking cessation in a homeless population: there is a will, but is there a way? *J Gen Intern Med.* 2002;17(5):369-72. Epub 2002/06/06.
108. Okuyemi KS, Caldwell AR, Thomas JL, Born W, Richter KP, Nollen N, et al. Homelessness and smoking cessation: insights from focus groups. *Nicotine Tob Res.* 2006;8(2):287-96. Epub 2006/06/13.
109. Dickens GL S, JH, Haw, CM. . Smoking in a forensic psychiatric service: a survey of inpatients' views. *J Psychiatr Ment Health Nurs.* 2005;12(6):672-8; quiz 8.
110. Richmond R, Butler T, Wilhelm K, Wodak A, Cunningham M, Anderson I. Tobacco in prisons: a focus group study. *Tob Control.* 2009;18(3):176-82. Epub 2009/02/04.
111. Lewis S, Russell A. Young smokers' narratives: public health, disadvantage and structural violence. *Sociol Health Illn.* 2013;35(5):746-60.
112. Garner L, Ratschen E. Tobacco smoking, associated risk behaviours, and experience with quitting: a qualitative study with homeless smokers addicted to drugs and alcohol. *BMC Public Health.* 2013;13:951. Epub 2013/10/12.
113. Patten CA. Tobacco cessation intervention during pregnancy among Alaska Native women. *J Cancer Educ.* 2012;27 Suppl 1:S86-90. Epub 2012/02/09.
114. Bott MJ, Cobb AK, Scheibmeir MS, O'Connell KA. Quitting: Smokers Relate their Experiences. *Qual Health Res.* 1997;7(2):255-69.
115. File SE, Dinnis AK, Heard JE, Irvine EE. Mood differences between male and female light smokers and nonsmokers. *Pharmacol Biochem Behav.* 2002;72(3):681-9. Epub 2002/08/15.
116. Hajek P, Taylor T, McRobbie H. The effect of stopping smoking on perceived stress levels. *Addiction.* 2010;105(8):1466-71. Epub 2010/06/10.
117. Mulder I, Tijhuis M, Smit HA, Kromhout D. Smoking cessation and quality of life: the effect of amount of smoking and time since quitting. *Prev Med.* 2001;33(6):653-60. Epub 2001/11/22.
118. Carmody TP. Affect regulation, nicotine addiction, and smoking cessation. *J Psychoactive Drugs.* 1992;24(2):111-22. Epub 1992/04/01.
119. DiFranza JR, Wellman RJ. A sensitization-homeostasis model of nicotine craving, withdrawal, and tolerance: integrating the clinical and basic science literature. *Nicotine Tob Res.* 2005;7(1):9-26. Epub 2005/04/05.
120. Parrott AC. Does cigarette smoking cause stress? *Am Psychol.* 1999;54(10):817-20. Epub 1999/11/30.
121. Browning KK, Ferketich AK, Salsberry PJ, Wewers ME. Socioeconomic disparity in provider-delivered assistance to quit smoking. *Nicotine Tob Res.* 2008;10(1):55-61. Epub 2008/01/12.
122. Aveyard P, Begh R, Parsons A, West R. Brief opportunistic smoking cessation interventions: a systematic review and meta-analysis to compare advice to quit and offer of assistance. *Addiction.* 2012;107(6):1066-73. Epub 2011/12/20.
123. Stead LF, Buitrago D, Preciado N, Sanchez G, Hartmann-Boyce J, Lancaster T. Physician advice for smoking cessation. *Cochrane Database Syst Rev.* 2013;5:CD000165. Epub 2013/06/04.

- 1  
2  
3 124. Stead M, Angus K, Holme I, Cohen D, Tait G, Team PER. Factors influencing European GPs'  
4 engagement in smoking cessation: a multi-country literature review. *Br J Gen Pract*.  
5 2009;59(566):682-90. Epub 2009/08/14.
- 6 125. Bryant J, Bonevski B, Paul C, Hull P, O'Brien J. Implementing a smoking cessation program in  
7 social and community service organisations: a feasibility and acceptability trial. *Drug Alcohol Rev*.  
8 2012;31(5):678-84. Epub 2011/12/08.
- 9 126. Christiansen BA, Brooks M, Keller PA, Theobald WE, Fiore MC. Closing tobacco-related  
10 disparities: Using community organizations to increase consumer demand. *Am J Prev Med*.  
11 2010;38(3 Suppl):S397-402. Epub 2010/03/05.
- 12 127. Bell K, Salmon A, Bowers M, Bell J, McCullough L. Smoking, stigma and tobacco  
13 'denormalization': Further reflections on the use of stigma as a public health tool. A commentary on  
14 *Social Science & Medicine's Stigma, Prejudice, Discrimination and Health Special Issue (67: 3)*. *Soc Sci*  
15 *Med*. 2010;70(6):795-9; discussion 800-1. Epub 2010/01/02.
- 16 128. Lavack L. Denormalization of tobacco in Canada. *Social Marketing Quarterly*. 1999;5(3):82-5.
- 17 129. El-Guebaly N, Cathcart J, Currie S, Brown D, Gloster S. Public health and therapeutic aspects  
18 of smoking bans in mental health and addiction settings. *Psychiatr Serv*. 2002;53(12):1617-22. Epub  
19 2002/12/04.
- 20 130. Williams JM, Ziedonis D. Addressing tobacco among individuals with a mental illness or an  
21 addiction. *Addict Behav*. 2004;29(6):1067-83. Epub 2004/07/09.
- 22 131. Ziedonis DM, Guydish J, Williams J, Steinberg M, Foulds J. Barriers and solutions to  
23 addressing tobacco dependence in addiction treatment programs. *Alcohol Res Health*.  
24 2006;29(3):228-35. Epub 2007/03/22.
- 25 132. Frohlich KL, Mykhalovskiy E, Poland BD, Haines-Saah R, Johnson J. Creating the socially  
26 marginalised youth smoker: the role of tobacco control. *Sociol Health Illn*. 2012;34(7):978-93. Epub  
27 2012/03/06.
- 28 133. Cosh S, Maksimovic L, Ettridge K, Copley D, Bowden JA. Aboriginal and Torres Strait Islander  
29 utilisation of the Quitline service for smoking cessation in South Australia. *Australian Journal of*  
30 *Primary Health*. 2013;19(2):113-8.
- 31 134. Bramley D, Riddell T, Whittaker R, Corbett T, Lin RB, Wills M, et al. Smoking cessation using  
32 mobile phone text messaging is as effective in Maori as non-Maori. *N Z Med J*.  
33 2005;118(1216):U1494. Epub 2005/06/07.
- 34 135. Daley CM, James AS, Barnoskie RS, Segraves M, Schupbach R, Choi WS. "Tobacco has a  
35 purpose, not just a past": Feasibility of developing a culturally appropriate smoking cessation  
36 program for a pan-tribal native population. *Med Anthropol Q*. 2006;20(4):421-40. Epub 2007/01/18.
- 37 136. Richmond R, Indig D, Butler T, Wilhelm K, Archer V, Wodak A. A randomized controlled trial  
38 of a smoking cessation intervention conducted among prisoners. *Addiction*. 2013;108(5):966-74.  
39 Epub 2012/12/12.
- 40 137. Richmond RL, Butler T, Belcher JM, Wodak A, Wilhelm KA, Baxter E. Promoting smoking  
41 cessation among prisoners: feasibility of a multi-component intervention. *Aust N Z J Public Health*.  
42 2006;30(5):474-8. Epub 2006/11/01.
- 43 138. Siru R, Hulse GK, Tait RJ. Assessing motivation to quit smoking in people with mental illness:  
44 a review. *Addiction*. 2009;104(5):719-33. Epub 2009/05/06.
- 45 139. Dani JA, Harris RA. Nicotine addiction and comorbidity with alcohol abuse and mental illness.  
46 *Nat Neurosci*. 2005;8(11):1465-70. Epub 2005/10/28.
- 47 140. Lawn S, Hersh D, Ward PR, Tsourtos G, Muller R, Winefield A, et al. 'I just saw it as something  
48 that would pull you down, rather than lift you up': resilience in never-smokers with mental illness.  
49 *Health Educ Res*. 2011;26(1):26-38. Epub 2010/11/11.
- 50 141. Ward PR, Muller R, Tsourtos G, Hersh D, Lawn S, Winefield AH, et al. Additive and  
51 subtractive resilience strategies as enablers of biographical reinvention: a qualitative study of ex-  
52 smokers and never-smokers. *Soc Sci Med*. 2011;72(7):1140-8. Epub 2011/03/08.
- 53  
54  
55  
56  
57  
58  
59  
60

- 1  
2  
3 142. McGee R, Williams S, Nada-Raja S, Olsson CA. Tobacco Smoking in Adolescence Predicts  
4 Maladaptive Coping Styles in Adulthood. *Nicotine Tob Res.* 2013;15(12):1971-7.  
5 143. Gruskin EP, Greenwood GL, Matevia M, Pollack LM, Bye LL. Disparities in smoking between  
6 the lesbian, gay, and bisexual population and the general population in California. *Am J Public*  
7 *Health.* 2007;97(8):1496-502. Epub 2007/06/30.  
8 144. Weber MF, Banks E, Sitas F. Smoking in migrants in New South Wales, Australia: Report on  
9 data from over 100 000 participants in the 45 and Up Study. *Drug Alcohol Rev.* 2011;30(6):597-605.  
10 145. Substance Abuse and Mental Health Services Administration OoAS. Results from the 2007  
11 National Survey on Drug Use and Health: National Findings Rockville, MD.: 2008 Contract No.: DHHS  
12 Publication No. SMA 08-4343.  
13 146. Fazel S, Khosla V, Doll H, Geddes J. The prevalence of mental disorders among the homeless  
14 in western countries: systematic review and meta-regression analysis. *PLoS Med.* 2008;5(12):e225.  
15 Epub 2008/12/05.  
16 147. West R, McEwen A, Bolling K, Owen L. Smoking cessation and smoking patterns in the  
17 general population: a 1-year follow-up. *Addiction.* 2001;96(6):891-902. Epub 2001/06/12.  
18  
19  
20  
21  
22  
23  
24  
25  
26  
27  
28  
29  
30  
31  
32  
33  
34  
35  
36  
37  
38  
39  
40  
41  
42  
43  
44  
45  
46  
47  
48  
49  
50  
51  
52  
53  
54  
55  
56  
57  
58  
59  
60

1  
2  
3 **Perceived barriers to smoking cessation in selected vulnerable groups: A systematic**  
4 **review of the qualitative and quantitative literature.**  
5  
6  
7  
8

9 **Twyman, Laura,<sup>1\*</sup> Bonevski, Billie,<sup>1</sup> Paul, Chris,<sup>2</sup> & Bryant, Jamie.<sup>2</sup>**  
10

11 **<sup>1</sup>School of Medicine and Public Health, Faculty of Health, University of Newcastle,**  
12 **Callaghan, NSW 2308, Australia.**  
13

14 **<sup>2</sup> Priority Research Centre for Health Behaviour and Health Behaviour Research**  
15 **Group, University of Newcastle & Hunter Medical Research Institute**  
16  
17

18 **\*Correspondence to: Laura Twyman. Email: [Laura.Twyman@newcastle.edu.au](mailto:Laura.Twyman@newcastle.edu.au)**  
19

20 **Contact address: Level 5 McAuley building Calvary Mater Hospital Waratah Postcode:**  
21 **2298 New South Wales Australia**  
22

23 **Keywords:** smoking cessation, vulnerable populations, disadvantage, barriers, systematic  
24 **review**  
25

26 **Word count: 5720**  
27  
28  
29  
30  
31  
32  
33  
34  
35  
36  
37  
38  
39  
40  
41  
42  
43  
44  
45  
46  
47  
48  
49  
50  
51  
52  
53  
54  
55  
56  
57  
58  
59  
60

## ABSTRACT

**Objectives:** To identify barriers which are common and unique to six selected vulnerable groups: low socioeconomic status; Indigenous; mental illness and substance abuse; homeless; prisoners and at-risk youth.

**Design:** A systematic review was carried out to identify the perceived barriers to smoking cessation within six vulnerable groups.

**Data sources:** Medline, EMBASE, CINAHL and PsycInfo were searched using keywords and MeSH terms from each database's inception published prior to March 2014.

**Study selection:** Studies that provided either qualitative or quantitative (i.e. longitudinal, cross-sectional or cohort surveys) descriptions of self-reported perceived barriers to quitting smoking in one of the six aforementioned vulnerable groups were included.

**Data extraction:** Two authors independently assessed studies for inclusion and extracted data.

**Results:** 65 eligible papers were identified: 24 with low socioeconomic groups, 16 with Indigenous groups, 18 involving people with a mental illness, three with homeless groups, two involving prisoners and one involving at risk youth. One study identified was carried out with participants who were homeless and addicted to alcohol and/or other drugs. Barriers common to all vulnerable groups included: smoking for stress management, lack of support from health and other service providers and the high prevalence and acceptability of smoking in vulnerable communities. Unique barriers were identified for people with a mental illness (e.g. maintenance of mental health), Indigenous groups (e.g. cultural and historical norms), prisoners (e.g. living conditions), people who are homeless (e.g. competing priorities) and at risk youth (e.g. high accessibility of tobacco).

**Conclusions:** Vulnerable groups experience common barriers to smoking cessation, in addition to barriers that are unique to specific vulnerable groups. Individual-level and



1  
2  
3 community and social network-level interventions are priority areas for future smoking  
4  
5 cessation interventions within vulnerable groups.  
6

7 **Trial registration:** A protocol for this review has been registered with PROSPERO  
8  
9 International Prospective Register of Systematic Reviews [Identifier: CRD42013005761].  
10  
11

## 12 13 14 298

### 15 16 17 18 Strengths:

- 19  
20 • This study provides a valuable synthesis of the literature examining the perceived  
21  
22 barriers to smoking cessation common and unique across six vulnerable groups.  
23

### 24 25 Limitations:

- 26  
27 • While the overall quality of the studies included in this review was acceptable, most  
28  
29 studies failed to provide information regarding the trustworthiness (qualitative  
30  
31 studies) or reliability and validity (quantitative studies) of the research.  
32  
33  
34  
35  
36  
37  
38  
39  
40  
41  
42  
43  
44  
45  
46  
47  
48  
49  
50  
51  
52  
53  
54  
55  
56  
57  
58  
59  
60

## INTRODUCTION

Tobacco use is the leading global cause of avoidable death worldwide (1) and a key modifiable risk factor for the development of a range of diseases, including cardiovascular disease, chronic obstructive pulmonary disease, and some cancers (1).

The prevalence of tobacco smoking is inversely related to socioeconomic position (SEP) in high-income countries (1). For example, in 2010 in Australia, the prevalence of smoking was 24.6% in the lowest socioeconomic areas compared to 12.5% in the highest socioeconomic areas (2). The highest rates of smoking are evident amongst the most vulnerable groups, including Indigenous groups (31% - 51.8%) (3-5); people with a mental illness (31.7-32.4%) (6), those with substance abuse disorders (77%) (7); the homeless (73%) (8); and prisoners (78% - 84%) (9, 10). For the purpose of this review, vulnerable groups are defined as groups that are more likely to experience social disadvantage due to lower income, material or cultural deprivation, and social exclusion (11).

Conflicting evidence exists regarding whether the rates of quit attempts in low SEP are similar to (12, 13) or lower (14-17) than the rates made by smokers in higher SEP. However, the success rate of quit attempts for lower SEP individuals is much lower than the success rate in higher SEP counterparts (13, 18).

There are many reasons quit success may be lower in vulnerable groups(19, 20). Within the health behaviour literature, factors that prevent an individual from undertaking health behaviour change have been referred to as barriers. Barriers are often conceptualised as either structural or individual psychosocial factors (21). Structural barriers include systems, organisations and the relationship between systems and individuals, for example lack of accessible smoking cessation programs. Individual barriers refer to the subjective experience of the individual, for example physical addiction to nicotine.

This definition of barriers is congruent with the social determinants of health framework (SDHF)(22). The SDHF holds that an individual's health is influenced by factors across many levels, from individual genetic and physical characteristics, social and community networks, to broader influences of culture, socioeconomic determinants and the environment. This framework has been used to examine the determinants of health inequities(23). Because the SDHF classifies determinants of health as individual, social and broader cultural and environmental factors, it also allows the identification of distinct levels of intervention for health policies.

Within the general population, cross-sectional studies have found variation in the most commonly reported barriers to cessation. Enjoyment (79%)(24); cravings (75%) (24); and stress management (36% - 63%) (24, 25) are the most frequently reported barriers. Irritability (39% - 42%) (26); habit (39%) (25); withdrawal symptoms (28% - 48%) (24, 25); fear of failure (17% - 32%) (24, 25) and concern about weight gain (27%-34%) (24-26) are also identified as barriers to cessation.

The effect of socioeconomic position on perceived barriers to quitting was examined in a representative sample (n = 2,133) in the United Kingdom (27). Enjoyment (51%) and stress relief (47%) were the most frequently endorsed motives for continuing to smoke across the sample; however as socioeconomic position decreased, the likelihood of reporting stress management and avoiding boredom as motives to continue to smoke increased. This suggests that smokers from vulnerable groups may experience barriers to smoking cessation differently than those in the general population (27).

Smoking in vulnerable groups is known to be influenced and perpetuated by a complex range of social, cultural and environmental factors (28) including high acceptability of smoking (29) and higher retailing of tobacco in low socioeconomic areas (30). Two previous studies have reviewed the literature to examine barriers to quitting smoking amongst

1  
2  
3 vulnerable groups. One focussed on Aboriginal pregnant women (31), and one focussed on  
4  
5 the barriers to smoking cessation service utilisation amongst low income smokers (32). Both  
6  
7 reviews found pro-smoking social norms, inadequate knowledge regarding smoking related  
8  
9 risks, and lack of access to appropriate cessation services inhibited participants' ability to  
10  
11 quit.  
12

13  
14 As the term vulnerable applies to multiple discrete groups, it is important to  
15  
16 understand which barriers (if any) are unique for example, cultural factors that inhibit  
17  
18 smoking cessation may be unique to some Indigenous groups (31). A systematic examination  
19  
20 of potential unique barriers would be valuable in order to develop and deliver appropriate  
21  
22 suites of intervention techniques for specific vulnerable groups.  
23

24  
25 Understanding the perceived barriers to quitting is important in order to better  
26  
27 understand smoking, relapse and quitting related behaviours, to inform appropriate policy,  
28  
29 and facilitate the development of effective tailored smoking cessation interventions. Given  
30  
31 the exceptionally high smoking rates and low quit success amongst vulnerable groups, there  
32  
33 is a critical need for a systematic and comprehensive review of the literature of the perceived  
34  
35 barriers to quitting smoking amongst vulnerable smokers.  
36  
37  
38  
39  
40

#### 41 **Aims**

42  
43 This systematic review aims to provide a comprehensive synthesis of the self-reported  
44  
45 barriers to quitting smoking within six vulnerable groups by reviewing the qualitative and  
46  
47 quantitative literature. The review will focus on the perceived, self-reported barriers to  
48  
49 smoking cessation in six selected vulnerable groups: low socioeconomic status (low SES),  
50  
51 Indigenous, mental illness and substance abuse, homeless, prisoners, and at-risk youth. These  
52  
53 groups were selected because they represent a large proportion of those classified as  
54  
55 vulnerable to socioeconomic disadvantage (33); who exhibit smoking rates higher than that of  
56  
57  
58  
59  
60

1  
2  
3 the general population (2-10); and who are identified as priority groups targeted for smoking  
4  
5 cessation programs and policies by peak health authorities (34-36). Specifically, the review  
6  
7 aims to:  
8  
9

- 10  
11 a) identify barriers which are common across all vulnerable groups included in the review  
12  
13 and  
14  
15 b) identify barriers that may be unique to specific groups.  
16  
17  
18  
19

20  
21 The results of the review will be used to develop a practical model to help understand the  
22  
23 barriers to quitting amongst vulnerable groups and to aid smoking cessation intervention  
24  
25 development.  
26  
27  
28

## 29 **METHOD**

### 30 **Study design**

31  
32 Guidelines for the reporting of systematic reviews (PRISMA) (37) and qualitative  
33  
34 synthesis (ENTREQ) (38) were followed. A protocol for this review was registered with  
35  
36 PROSPERO International Prospective Register of Systematic Reviews [Identifier:  
37  
38 CRD42013005761].  
39  
40  
41  
42  
43  
44

### 45 **Databases and search**

46  
47 Medline, EMBASE, CINAHL and PsycInfo were searched using keywords and  
48  
49 MeSH terms from each database's inception published prior to March 2014. The reference  
50  
51 lists of key articles and reviews were also manually searched in order to identify any other  
52  
53 relevant articles. An extensive list of search terms was used in order to ensure that as many  
54  
55 relevant articles as possible were captured (See Table 1).  
56  
57  
58  
59  
60

Table 1. Search strategy

|    |    |                                                |
|----|----|------------------------------------------------|
| 1  | 1  | Tobacco/                                       |
| 2  | 2  | Tobacco use/                                   |
| 3  | 3  | Tobacco use cessation/                         |
| 4  | 4  | Tobacco smoking/                               |
| 5  | 5  | Smoking/                                       |
| 6  | 6  | Smoking Cessation/                             |
| 7  | 7  | Tobacco use cessation/                         |
| 8  | 8  | Tobacco dependence/                            |
| 9  | 9  | Cigarette smoking/                             |
| 10 | 10 | Or/1-9                                         |
| 11 | 11 | Homeless youth/                                |
| 12 | 12 | Homeless persons/                              |
| 13 | 13 | Housing/                                       |
| 14 | 14 | Homeless mentally ill/                         |
| 15 | 15 | Homelessness or homeless/                      |
| 16 | 16 | Community programs/                            |
| 17 | 17 | Or/11-16                                       |
| 18 | 18 | Prisoner or Prisons/                           |
| 19 | 19 | Correctional Health Services/                  |
| 20 | 20 | Correctional facilities/                       |
| 21 | 21 | Jail/                                          |
| 22 | 22 | Or/18-21                                       |
| 23 | 23 | Anxiety/                                       |
| 24 | 24 | Depression/                                    |
| 25 | 25 | Schizophrenia/                                 |
| 26 | 26 | Mentally ill persons/                          |
| 27 | 27 | Mental health/                                 |
| 28 | 28 | Mental illness/                                |
| 29 | 29 | Mental disorder/                               |
| 30 | 30 | Mental disease/                                |
| 31 | 31 | Mental patient/                                |
| 32 | 32 | Mental health services/                        |
| 33 | 33 | Substance-related disorders/                   |
| 34 | 34 | Drug use/                                      |
| 35 | 35 | Drug abuse/                                    |
| 36 | 36 | Alcohol-related disorders/                     |
| 37 | 37 | Or/23-36                                       |
| 38 | 38 | Adolescent behaviour/                          |
| 39 | 39 | Juvenile delinquency/                          |
| 40 | 40 | Juvenile offenders/                            |
| 41 | 41 | Disruptive Behaviors or disruptive behaviours/ |
| 42 | 42 | At-risk youth/                                 |
| 43 | 43 | At-risk young people/                          |
| 44 | 44 | Or/38-43                                       |
| 45 | 45 | Indigenous/                                    |
| 46 | 46 | Indigenous health/                             |
| 47 | 47 | Indigenous peoples/                            |
| 48 | 48 | Indigenous populations/                        |
| 49 | 49 | Aboriginal/                                    |
| 50 | 50 | Aboriginal and Torres Strait Islanders/        |
| 51 | 51 | Inuits/                                        |
| 52 | 52 | Eskimo/                                        |
| 53 | 53 | Alaska Native/                                 |

1  
2  
3  
4  
5  
6  
7  
8  
9  
10  
11  
12  
13  
14  
15  
16  
17  
18  
19  
20  
21  
22  
23  
24  
25  
26  
27  
28  
29  
30  
31  
32  
33  
34  
35  
36  
37  
38  
39  
40  
41  
42  
43  
44  
45  
46  
47  
48  
49  
50  
51  
52  
53  
54  
55  
56  
57  
58  
59  
60

---

|    |                                                                                     |
|----|-------------------------------------------------------------------------------------|
| 54 | Indians/                                                                            |
| 55 | Native American/                                                                    |
| 56 | Native Hawaiian/                                                                    |
| 57 | American Indian/                                                                    |
| 58 | Indians, North American/                                                            |
| 59 | Indians, South American/                                                            |
| 60 | Indians, Central American/                                                          |
| 61 | First Nations/                                                                      |
| 62 | Pacific Islander/                                                                   |
| 63 | Maori/                                                                              |
| 64 | Oceanic ancestry group/                                                             |
| 65 | American Native Continental Ancestry Group/                                         |
| 66 | Or/45-65                                                                            |
| 67 | Poverty                                                                             |
| 68 | Social status                                                                       |
| 69 | Social class                                                                        |
| 70 | Low income population                                                               |
| 71 | Inequalities                                                                        |
| 72 | Socioeconomic status                                                                |
| 73 | Socioeconomic factors                                                               |
| 74 | Disadvantaged                                                                       |
| 75 | Underserved                                                                         |
| 76 | Or/67-75                                                                            |
| 77 | Related to smoking cessation/quitting smoking                                       |
| 78 | Correlated with smoking cessation/quitting smoking                                  |
| 79 | Associated with smoking cessation/quitting smoking                                  |
| 80 | That affect smoking cessation/quitting smoking                                      |
| 81 | That inhibit smoking cessation/quitting smoking                                     |
| 82 | That prevent smoking cessation/quitting smoking                                     |
| 83 | Barriers to smoking cessation/quitting smoking                                      |
| 84 | Factor\$ or Determinant\$ or Variable\$ or Covariable\$ or Predictor\$ or Barrier\$ |
| 85 | Or/77-84                                                                            |
| 86 | 10 AND 85 AND 17                                                                    |
| 87 | 10 AND 85 AND 22                                                                    |
| 88 | 10 AND 85 AND 37                                                                    |
| 89 | 10 AND 85 AND 44                                                                    |
| 90 | 10 AND 85 AND 66                                                                    |
| 91 | 10 AND 85 AND 76                                                                    |

---

### Inclusion and exclusion criteria

Studies that provided either qualitative or quantitative (i.e. longitudinal, cross-sectional or cohort surveys) descriptions of perceived self-reported barriers to quitting smoking in low SES groups, Indigenous groups, people with a mental illness or substance

1  
2  
3 abuse problems, people who are homeless, prisoners or at-risk youth were included. See  
4  
5 Table 2 for definitions used as inclusion criteria for each vulnerable group. Only studies  
6  
7 carried out in high income countries were included as middle and low income countries may  
8  
9 present different contextual, political and economic barriers which require separate  
10  
11 consideration. Only studies published in English were included as resources required to  
12  
13 translate articles were beyond the scope of this review. Intervention studies were excluded, as  
14  
15 barriers discussed within these studies related to use of the intervention being tested and not  
16  
17 barriers to smoking cessation per se. Studies examining factors associated with quit attempts  
18  
19 or success were excluded unless they included results on the perceived barriers self-reported  
20  
21 by participants from vulnerable groups. Studies describing *provider* reports of the barriers to  
22  
23 the provision of smoking cessation support or treatment, and unpublished grey literature,  
24  
25 were also excluded. There were no cut offs for sample size.  
26  
27  
28  
29  
30  
31  
32  
33  
34  
35  
36  
37  
38  
39  
40  
41  
42  
43  
44  
45  
46  
47  
48  
49  
50  
51  
52  
53  
54  
55  
56  
57  
58  
59  
60



Table 2. Inclusion criteria definitions of each group.

| Group                          | Definition                                                                                                                                                                                                                                                                                                                        |
|--------------------------------|-----------------------------------------------------------------------------------------------------------------------------------------------------------------------------------------------------------------------------------------------------------------------------------------------------------------------------------|
| Low socioeconomic status (SES) | Because definitions of low SES vary across high income countries this study used an inclusive definition of low SES. Studies were included if they described participants as being low SES and gave at least one measure of SES. This measure could be income (above/below poverty level); address in deprived neighbourhood etc. |
| Indigenous groups              | The following definition was used to define potential Indigenous studies in accordance with previous studies (39): “the experiences shared by a group of people who have inhabited a country for thousands of years, which often contrast with those of other groups residing in the same country for a few hundred years” (40).  |
| Mental Illness                 | People with a mental illness were defined as individuals who had been diagnosed with a mental illness, severe mental illness or were described as inpatients or outpatients in a mental health rehabilitation facility. Substance use disorders were also included. All mental illnesses were included.                           |
| At-risk youth                  | At-risk youth were defined as individuals under the age of 21 who have experienced or are experiencing; problems at school; physical, sexual or psychological abuse; mental or physical health problems; economic disadvantage or who have committed a violent or delinquent act (USA Code).                                      |
| Prisoners                      | Prisoners included both those currently incarcerated and those ex-prisoners living in the community.                                                                                                                                                                                                                              |
| Homeless                       | Homeless individuals were defined as those individuals described as meeting national criteria for homelessness or those individuals accessing services provided to homeless persons.                                                                                                                                              |
| Smoker                         | Smokers were defined as self-reported daily or occasional cigarette smokers. Studies that also assessed ex-smokers were only included if the majority of participants were current smokers, or if the results were reported by smoking status. Studies were excluded if they focussed solely on ex-smokers or non-smokers.        |

### **Data extraction**

The titles and abstracts of retrieved publications were assessed by one reviewer (LT) against eligibility criteria and excluded if they did not meet inclusion criteria. A second reviewer (a Research Assistant) independently assessed 20% of the returned abstracts for inclusion with 100% agreement between reviewers. Data from included journal articles was extracted into summary tables independently by one reviewer (LT) and a random 20% checked by a second (Research Assistant). Agreement was again high (97%). Discrepancies were settled by discussion between the reviewers. Data extracted from the articles included: study aims, setting, sample characteristics, response rates, study methodology, data analysis and the barriers identified. Barriers were defined as factors that prevented smoking cessation and/or quit attempts or were reported as primary reasons for continuing to smoke.

### **Risk of bias in individual studies**

Quality assessment was performed independently by all authors, with two reviewers per manuscript. The methodological quality of qualitative studies was assessed using the McMaster Qualitative Criteria Form (41). Quantitative studies were assessed using a tool adapted from the STROBE statement (42). As there is a lack of an agreed, valid and reliable measure to assess the quality of mixed methods studies (43), both the McMaster guidelines and the adapted quantitative framework were applied to the corresponding qualitative and quantitative components of any mixed methods studies identified.

### **Synthesis of results**

Results were synthesised by vulnerable group using narrative synthesis and inductive data analysis techniques. Narrative synthesis allows the examination of studies that are highly heterogeneous in their research questions, samples and methods (44, 45). In order to avoid

1  
2  
3 potential biases, care was taken to also identify points of difference between studies (46).

4  
5 Where a barrier was reported in more than one study, this was recorded. In quantitative  
6  
7 studies, the proportion of respondents reporting each barrier was calculated. Barriers were  
8  
9 combined into categories and then classified using the SDHF (22). For the purposes of this  
10  
11 review, individual factors were defined as physical or psychological barriers to quitting  
12  
13 smoking: for example, the individual's level of nicotine dependence or motivation to quit.  
14  
15 Lifestyle factors were defined as health behaviours (including alcohol and other drug use)  
16  
17 that impeded an individual's ability to quit. Social and community networks were defined as  
18  
19 the impact of an individual's family and friend networks, and the wider community. Living  
20  
21 and working conditions encompassed factors including housing, health care, education and  
22  
23 employment. The final domain was the broader socioeconomic, cultural and environmental  
24  
25 background perceived to influence smoking cessation.  
26  
27  
28  
29  
30  
31

## 32 RESULTS

### 33 Search results

34  
35 After duplicates were removed, 21,767 studies were identified from electronic  
36  
37 searches and a further 27 from manual searches. Of those, 65 studies met inclusion criteria  
38  
39 and were included in the review (see Figure 1). Supplementary file 1 contains a list of full  
40  
41 text articles that were retrieved, reviewed and excluded as per the inclusion criteria. Two  
42  
43 systematic reviews concerning Indigenous Australian pregnant women (31) and pregnant  
44  
45 women (47); and two critical reviews providing summaries of the barriers to quitting (32, 48)  
46  
47 were also identified from hand searches.  
48  
49  
50  
51  
52  
53

### 54 Study characteristics

55  
56  
57  
58  
59  
60

1  
2  
3 The majority of studies (n = 24) identified barriers to smoking cessation in low SES groups  
4 (29, 49-71), Indigenous groups (n = 16) (72-87), and people with a mental illness (n = 18)  
5 (88-105) including two concerning those with substance use disorders (101, 104). Three  
6  
7 studies reported barriers to quitting within the homeless (106-108) and two reported barriers  
8  
9 within prisoner groups (109, 110). One study with at-risk youth was identified (111). Two  
10  
11 other studies concerning Alaska Native participants (age range from 11 to 18) (86) and  
12  
13 people with a mental illness (age range from 16 to 23) (103) included younger people as  
14  
15 participants. One study was identified that was carried out with participants who were both  
16  
17 homeless and addicted to drugs and/or alcohol (112). Since the study comprised participants  
18  
19 that met criteria for inclusion in two of the vulnerable groups included in this review (both  
20  
21 the homeless and mental illness/substance use groups) this study was included in a seventh  
22  
23 category containing “multiple” participant groups. Supplementary files 2, 3 and 4 summarize  
24  
25 the included quantitative, qualitative and mixed methods studies respectively. An overview of  
26  
27 the characteristics of included studies can be found in Supplementary file 5.  
28  
29  
30  
31  
32  
33  
34  
35

### 36 **Quality assessment of qualitative studies**

37  
38 The results of the quality assessment of qualitative studies are presented in  
39  
40 Supplementary file 6. Overall, the quality of studies varied widely. The majority of studies  
41  
42 did not explicitly state their study design (n = 38); of those that did, most used Grounded  
43  
44 Theory (57, 59, 61, 93, 98, 99). Most studies provided adequate descriptions of the study  
45  
46 sites; participants; data collection methods and analysis techniques. Studies generally  
47  
48 performed poorly when assessed on four components of trustworthiness, with only fifteen  
49  
50 studies meeting all four criteria (credibility; transferability; dependability and confirmability)  
51  
52 [41,44,48,50,58,60,64,65,68,69,72,73,75,76,84]. It should be noted that none of the mixed  
53  
54  
55  
56  
57  
58  
59  
60

1  
2  
3 methods studies explicitly described their methodology as mixed methods nor did they report  
4  
5 integrating the qualitative and quantitative findings in a systematic way.  
6  
7  
8

### 9 10 **Quality assessment of quantitative studies**

11  
12 The results of the quality assessment of quantitative studies are presented in  
13  
14 Supplementary file 7. Sample sizes in the quantitative studies ranged from 36 to 500  
15  
16 participants. Response rates ranged from 42% to over 97% (three studies did not provide  
17  
18 response rates) [70,91,92]. All but one study [81] clearly stated eligibility criteria. All studies  
19  
20 stated their outcome a priori and no conflicts of interest were identified. The validity and  
21  
22 reliability of survey measures used to assess barriers to cessation were reported in one study  
23  
24 [53]. Three studies employed techniques such as pilot testing and input from key stakeholders  
25  
26 in developing the tools used [53,77,95].  
27  
28  
29  
30  
31

### 32 **Perceived barriers to smoking cessation**

33  
34 The barriers to quitting smoking endorsed over multiple studies included: smoking for  
35  
36 stress management; enjoyment of smoking; addiction to nicotine; habit; social acceptability  
37  
38 of smoking; lack of support to quit and access to quit resources; boredom; stressful life  
39  
40 factors; pro-smoking living environments; smoking cultural norms and socioeconomic  
41  
42 disadvantage. Figure 2 demonstrates the barriers reported in this review categorised by the  
43  
44 SDHF. For brevity, the current results section will focus on those barriers that were common  
45  
46 across all groups and unique to certain vulnerable groups. Supplementary file 8 provides a  
47  
48 detailed description of all of the barriers identified in this review. Table 3 provides a  
49  
50 summary of the barriers extracted from the qualitative studies. References of studies that  
51  
52 report one or more barriers at a given level of the SDHF are included in Table 3. Table 4  
53  
54  
55  
56  
57  
58  
59  
60

1  
2  
3 provides a summary of the results of quantitative studies including the proportion of  
4  
5 participants endorsing the barrier and the study reference.  
6  
7  
8

### 9 10 **Barriers common across all groups**

11 Three barriers were present in all six vulnerable groups included in this review: 1)  
12 stress management, 2) lack of support to quit from health professionals and other service  
13 providers, and 3) high prevalence and acceptability of smoking within vulnerable  
14  
15 communities.  
16  
17  
18  
19

20 Within the SDHF, stress management was categorised as an individual level barrier.  
21 Forty qualitative studies identified stress management as a significant barrier to smoking  
22 cessation (50-56, 58, 59, 61-63, 65, 67-69, 72, 74, 75, 80, 81, 83, 84, 86, 87, 89, 90, 92, 93,  
23 95-97, 99, 100, 103, 105, 108, 110-112). Smoking was used as a coping mechanism (52, 58,  
24 62-65, 69, 74, 89, 90, 92, 97, 99) in reaction to daily stressors as well as the stress inherent in  
25 vulnerable lives. Three quantitative studies reported stress management as a barrier to  
26 quitting with Maori participants (48%) (79), participants with substance use disorders (39%)  
27 (104) and homeless participants (44%) (107). Of note, participants in two studies reported  
28 that smoking also directly contributed to the stress experienced by participants (51, 111).  
29 Participants also reported using smoking to manage their emotions and mood (58, 65, 72, 83,  
30 84, 90, 93, 98, 103, 113). Twenty three percent of participants from a Maori sample indicated  
31 managing emotions was a barrier to quitting (79), 42% of individuals with a substance use  
32 disorder (101).  
33  
34  
35  
36  
37  
38  
39  
40  
41  
42  
43  
44  
45  
46  
47  
48

49 High prevalence and acceptability of smoking within vulnerable communities was  
50 categorised as a community and social network level barrier. Eight qualitative (53, 54, 69, 75,  
51 79, 80, 98, 111) and four quantitative (60, 101, 107, 109) studies found that being around  
52 other smokers was a barrier to quitting. This finding is reinforced by participants describing  
53  
54  
55  
56  
57  
58  
59  
60

1  
2  
3 the high prevalence of smoking amongst family and friends in 22 studies (29, 51, 52, 56, 62,  
4 68, 69, 72, 74, 76, 81, 83, 85-87, 90, 93, 95, 96, 103, 111, 112) and in the wider community  
5 in 18 studies (29, 51, 52, 56, 62, 66, 69, 72, 74, 76, 81, 83, 85-87, 93, 96, 112). Tobacco was  
6 readily available and easily accessible within vulnerable communities (51, 62, 66, 76, 83, 90,  
7 91, 111) and smoking was considered to be a highly acceptable (29, 79, 81-83, 85-87) and  
8 normalised behaviour (52, 56, 62, 66, 69, 79, 81-83, 85, 87).

9  
10  
11  
12  
13  
14  
15  
16 Lack of support to quit from health and other service providers to quit was also  
17 categorised as a social and community network barrier. Other service providers include  
18 management and staff in prisons, homeless shelters and organisations, and members of the  
19 community. Thirteen qualitative studies (52, 55, 56, 58, 74, 77, 83, 86, 91, 92, 95, 108, 112)  
20 and one quantitative study (109) reported a perceived lack of support from health  
21 professionals regarding smoking cessation. Cases of family members and health professionals  
22 actively discouraging quit attempts and encouraging maintenance of smoking due to concerns  
23 about the individual's mental health (92, 93, 95, 96, 112) or because smoking was perceived  
24 to be the individual's only source of enjoyment (54, 77, 79, 83) were reported. Three studies  
25 identified tobacco use by health professionals and others involved in the participants' care as  
26 a barrier to cessation (77, 95, 109). Over half (55.9%) of prisoners surveyed reported  
27 observing members of staff smoking as a barrier to quitting (109). Studies involving people  
28 with a mental illness and prisoners identified use of cigarettes in order to reward or punish  
29 behaviour by health professionals and other service providers (93, 95, 96, 110) as a barrier to  
30 quitting. Twenty-nine percent of prisoners also indicated that not receiving cessation support  
31 from prison staff prevented them from quitting smoking (109). Twenty-six percent of  
32 substance abusing individuals reported they did not have enough support to quit. One study  
33 involving at risk youth identified smoking being unaddressed by teachers and members of the  
34 police force as a barrier to smoking cessation (111).

Table 3. A summary of the self-reported barriers to smoking cessation – qualitative and mixed methods studies by vulnerable group.

| Barrier                                 | Low SES groups (n = 22)         | Indigenous groups (n = 16)           | People with a mental illness (n=13) | Homeless groups (n = 3) | Prisoner groups (n = 2) | At risk youth (n = 1) | Multiple groups (n = 1) |
|-----------------------------------------|---------------------------------|--------------------------------------|-------------------------------------|-------------------------|-------------------------|-----------------------|-------------------------|
| <b>Individual and lifestyle factors</b> |                                 |                                      |                                     |                         |                         |                       |                         |
| Stress management                       | (50-59, 61-63, 65-69)           | (72, 74, 75, 79, 81, 83, 84, 86, 87) | (89, 90, 92, 93, 95-98, 105)        | (108)                   | (110)                   | (111)                 | (112)                   |
| Enjoyment                               | (50, 54-56, 59, 62, 63, 65, 67) | (79, 81-83)                          | (89, 90, 92-94, 97, 98, 105)        |                         |                         | (111)                 |                         |
| Addiction                               | (49, 50, 54, 57, 59, 67-69)     | (72, 74, 75, 81, 83, 84, 86)         | (90-92, 98)                         |                         |                         |                       |                         |
| Habit                                   | (50, 57, 65, 68)                | (75, 79, 83, 84)                     | (92, 105)                           |                         |                         |                       |                         |
| Mental health benefits                  | (58, 67)                        | (74)                                 | (89, 91-99)                         |                         |                         |                       |                         |
| Weight gain                             | (29, 49, 52-54, 64, 67)         | (72, 74, 84)                         | (91, 98)                            |                         |                         |                       |                         |
| Competing priorities                    | (56, 63)                        | (74, 75, 87)                         | (89, 91, 98, 99)                    | (108)                   |                         |                       |                         |
| Rationalisations                        | (54-56, 58, 61, 67)             | (74, 78, 82, 87)                     | (89, 97)                            |                         |                         |                       |                         |
| Other substance use                     | (49, 56, 59, 62)                | (74, 76, 81, 84)                     | (89)                                |                         |                         |                       | (112)                   |
| Autonomy                                | (56, 58, 68)                    | (83)                                 | (93, 97-99)                         |                         |                         |                       |                         |
| Low confidence                          | (52, 53, 56, 63, 67, 69)        | (73, 84)                             | (92, 96, 98)                        |                         |                         |                       | (112)                   |
| Cognitive benefits                      | (51)                            | (83)                                 | (93-95)                             |                         |                         |                       |                         |
| Loneliness                              | (52, 59, 65)                    |                                      | (93, 97, 98)                        |                         |                         |                       |                         |
| Low risk of harm                        | (58)                            | (87)                                 | (95, 97)                            |                         |                         |                       |                         |
| Low motivation                          |                                 |                                      | (92, 94, 97, 98)                    |                         |                         |                       |                         |
| Past failed attempts                    | (61)                            | (74)                                 |                                     |                         |                         |                       |                         |
| Positive smoker image                   | (29, 57)                        |                                      | (97)                                |                         |                         |                       |                         |
| <b>Social and community networks</b>    |                                 |                                      |                                     |                         |                         |                       |                         |
| Prevalence and acceptability            | (29, 51-54, 56, 62, 66, 68, 69) | (72, 74, 76, 79, 83, 85-87)          | (90, 91, 93, 95, 96, 105)           | (108)                   | (110)                   | (111)                 | (112)                   |
| Lack of social                          | (29, 49, 54-56, 58, 64,         | (74, 75, 77, 79, 83, 84)             | (91, 94, 98)                        | (108)                   |                         |                       |                         |



|                                                          |                              |                           |                              |       |       |       |       |
|----------------------------------------------------------|------------------------------|---------------------------|------------------------------|-------|-------|-------|-------|
| support                                                  | 67-69)                       |                           |                              |       |       |       |       |
| Social activity                                          | (29, 49, 53, 57, 62)         | (73-75, 79, 85, 87)       | (89, 90, 92, 93, 95, 97, 98) |       |       |       |       |
| Lack of health and other professional support            | (52, 54-56, 58)              | (74, 77, 79, 83, 86)      | (91-93, 95, 96)              | (108) | (110) | (111) | (112) |
| <b>Living and working conditions</b>                     |                              |                           |                              |       |       |       |       |
| Access to quit resources                                 | (52, 55, 56, 61-64)          | (72-74, 78, 81, 85, 86)   | (93, 96, 98)                 | (108) | (110) |       |       |
| Boredom                                                  | (50-52, 54-56, 59, 65)       | (75, 86)                  | (90, 94, 95, 97, 99)         | (108) | (110) |       |       |
| Concerns regarding treatment                             | (50, 52, 56, 58, 61-63, 69)  | (72-74, 77, 78, 81, 86)   | (91, 93, 96, 105)            | (108) |       |       |       |
| Stressful factors                                        | (56, 58, 59, 62, 63, 65, 68) | (74, 75, 85)              |                              |       | (110) |       |       |
| Living and working circumstances                         | (29, 54, 58)                 | (74)                      | (96)                         |       |       |       |       |
| <b>Cultural, socioeconomic and environmental factors</b> |                              |                           |                              |       |       |       |       |
| Cultural norms                                           | (56, 62)                     | (72-75, 78, 81-83, 85-87) | (93, 94, 98)                 |       | (110) |       |       |
| Socioeconomic factors                                    | (65)                         |                           | (97)                         |       |       |       |       |

### Barriers unique to certain vulnerable groups

Indigenous; prisoner; mentally ill, homeless, and at risk youth reported unique barriers to smoking cessation. Racism, historical factors (74, 75, 85), ceremonial use of tobacco (72, 73, 82, 85, 86), cultural values that promote sharing, kinship, and reciprocity (83), cultural values of pride, independence and self-reliance that affect help seeking behaviour (81, 82), cultural values concerning health and privacy (84), and maintenance of cultural identity (73-75, 82, 83, 85) were identified as barriers within Indigenous groups. Smoking cessation could therefore exclude an individual from fully participating in their culture or potentially challenge family, personal or community relationships.

1  
2  
3 Living environments and the stressful context of prison presented unique barriers for  
4  
5 prisoners, including social isolation, anxiety regarding legal matters, transfers to other  
6  
7 prisons, use of cigarettes as a currency, use of cigarettes as a way to reward or punish  
8  
9 behaviour, bullying, missing family and restricted movement throughout the day (110).  
10

11 Low levels of motivation (92, 94, 97, 98), concerns about ability of cessation services  
12  
13 to handle mental health issues (91, 93, 96), identity and belonging (93, 94, 98) and symptom  
14  
15 management (88-98) were barriers for people with mental illness.  
16  
17

18 Competing needs and prioritising need to find shelter/place to live were unique  
19  
20 barriers for individual who were homeless (108). Very high levels of accessibility of  
21  
22 cigarettes, and the regular practice of selling cigarettes to those under 18 years of age were  
23  
24 identified by one study with at risk youth as a unique barrier (104).  
25  
26  
27  
28  
29  
30  
31  
32  
33  
34  
35  
36  
37  
38  
39  
40  
41  
42  
43  
44  
45  
46  
47  
48  
49  
50  
51  
52  
53  
54  
55  
56  
57  
58  
59  
60

Table 4. A summary of the barriers to smoking cessation – reported prevalence of each barrier by vulnerable group for studies using quantitative and mixed methods<sup>ab</sup>.

| Barrier                                 | Reported prevalence of each barrier N/Total N (%) |                                   |                                                                                                                                     |                              |                         |
|-----------------------------------------|---------------------------------------------------|-----------------------------------|-------------------------------------------------------------------------------------------------------------------------------------|------------------------------|-------------------------|
|                                         | Low SES groups (n = 1)                            | Indigenous groups (n = 1)         | People with a mental illness (n = 3)                                                                                                | Homeless groups (n = 2)      | Prisoner groups (n = 1) |
| <b>Individual and lifestyle factors</b> |                                                   |                                   |                                                                                                                                     |                              |                         |
| Stress management                       |                                                   | 63/130 (48) <sup>(79)</sup>       | 30/78 (39) <sup>(104)</sup>                                                                                                         | 82/186 (44) <sup>(107)</sup> |                         |
| Relaxation                              | 261/500 (52) <sup>(60)</sup>                      | 22/130 (17) <sup>(79)</sup>       | 13/30 (42) <sup>(100)</sup><br>7/72 (10) <sup>(88)</sup>                                                                            |                              |                         |
| Enjoyment                               |                                                   | 33/130 (25) <sup>(79)</sup>       | 34/72 (47) <sup>(88)</sup><br>21/105 (20) <sup>(90)</sup><br>30/78 (39) <sup>(104)</sup>                                            |                              |                         |
| Addiction                               | 431/500 (86) <sup>(60)</sup>                      | 51/130 (39) <sup>(79)</sup>       | 56 (53) <sup>(90)</sup><br>10/30 (33) <sup>(100)</sup>                                                                              | 93/186 (50) <sup>(107)</sup> |                         |
| Cravings                                |                                                   |                                   | 53/78 (68) <sup>(104)</sup><br>47/96 (48) <sup>(101)</sup>                                                                          |                              |                         |
| Withdrawal symptoms                     |                                                   |                                   | 85/96 (87) <sup>(101)</sup>                                                                                                         |                              |                         |
| Habit                                   | 411/500 (82) <sup>(60)</sup>                      | 95/130 (73) <sup>(79)</sup>       | 26/72 (36) <sup>(88)</sup><br>20/105 (19) <sup>(90)</sup><br>17/30 (58) <sup>(100)</sup>                                            |                              |                         |
| Perceived Mental Health Benefits        |                                                   | 6 – 30/130 (5-23) <sup>(79)</sup> | 21/105 (20) <sup>(90)</sup><br>7 – 8/72 (10-11) <sup>(88)</sup><br>41/78 (53) <sup>(104)</sup><br>41-76/96 (42-78) <sup>(101)</sup> |                              |                         |
| Concentration                           |                                                   |                                   | 27-56/96 (28-55) <sup>(101)</sup>                                                                                                   |                              |                         |
| Low levels of motivation                | 131/350 (38) <sup>(70)</sup>                      |                                   | 46/96 (47) <sup>(101)</sup>                                                                                                         |                              |                         |
| Weight gain                             | 69/350 (20) <sup>(70)</sup>                       | 6/130 (5) <sup>(79)</sup>         | 3/72 (4) <sup>(88)</sup><br>39/96 (40) <sup>(101)</sup>                                                                             | 38/186 (20) <sup>(107)</sup> |                         |
| Other substance use                     |                                                   |                                   | 3/72 (4) <sup>(88)</sup><br>2-8/78 (3-10) <sup>(104)</sup>                                                                          |                              |                         |

|                                                    |                                           |                             |                                                            |                                                              |                            |
|----------------------------------------------------|-------------------------------------------|-----------------------------|------------------------------------------------------------|--------------------------------------------------------------|----------------------------|
|                                                    |                                           |                             | 13-40/96<br>(13-41) <sup>(101)</sup>                       |                                                              |                            |
| Problems getting to sleep                          |                                           |                             | 23/96 (23)<br>(101)                                        |                                                              |                            |
| Low confidence and perceived difficulty            | 87 - 202/350<br>(25 - 58) <sup>(70)</sup> |                             | 22/78<br>(24) <sup>(104)</sup>                             |                                                              | 25/34 (74)<br>(109)        |
| <b>Social and community networks</b>               |                                           |                             |                                                            |                                                              |                            |
| High prevalence and acceptability in the community | 332/500 (66)<br>(60)                      | 5/130 (12) <sup>(79)</sup>  | 13/105 (13)<br>(90)                                        | 78/186 (42)<br>(107)                                         | 27/34 (79)<br>(109)        |
|                                                    | 116/350 (33)<br>(70)                      |                             | 5/72 (7) <sup>(88)</sup><br>34/78<br>(43) <sup>(104)</sup> |                                                              |                            |
| Lack of social support                             | 90/350 (26)<br>(70)                       |                             |                                                            | 48/186 (26)<br>(107)<br>70-79/98<br>(71-79) <sup>(106)</sup> | 10/34 (29)<br>(109)        |
| Lack of health and other professional support      |                                           |                             | 3/72 (4) <sup>(88)</sup>                                   |                                                              | 19/34 (56)<br>(109)        |
| Social activity                                    |                                           | 44/130 (34) <sup>(79)</sup> | 17/30 (58)<br>(100)<br>2/72 (3) <sup>(88)</sup>            |                                                              |                            |
| Availability of cigarettes                         |                                           | 5/130 (4) <sup>(79)</sup>   | 8/105 (8) <sup>(90)</sup><br>5/72 (7) <sup>(88)</sup>      |                                                              |                            |
| <b>Living and working conditions</b>               |                                           |                             |                                                            |                                                              |                            |
| Access to quit resources                           | 108/350<br>(31) <sup>(70)</sup>           |                             |                                                            |                                                              | 9/34 (27) <sup>(109)</sup> |
| Boredom                                            | 242/500 (48)<br>(60)                      | 38/130 (29) <sup>(79)</sup> | 9/72 (13) <sup>(88)</sup><br>13/105 (13)<br>(90)           |                                                              |                            |
| Stressful factors                                  |                                           |                             | 4/72 (6) <sup>(88)</sup>                                   |                                                              |                            |
| Living environments                                |                                           |                             |                                                            |                                                              | 20 (59) <sup>(109)</sup>   |

<sup>a</sup> Decimals rounded to nearest whole number where appropriate.

<sup>b</sup> Numerators/denominators are presented first, followed by proportion (in parentheses), followed by reference.

## DISCUSSION

This is the first systematic review reporting perceived barriers to smoking cessation across a range of vulnerable groups. The findings from 54 qualitative, eight quantitative and three mixed methods studies demonstrate that barriers to quitting smoking operate at multiple levels including individual and lifestyle factors; social and community networks; living conditions; and cultural and socioeconomic factors. These include: smoking for stress management; enjoyment of smoking; addiction to nicotine; habit; social acceptability of smoking; lack of support to quit and access to quit resources; boredom; stressful life factors; pro-smoking living environments; cultural norms and socioeconomic disadvantage. Stress management, lack of support from health professionals and other service providers and the high prevalence and acceptability of smoking in communities were the three barriers common across all six vulnerable groups included in this review. [The identification of perceived barriers common across vulnerable groups is an extension of the previous literature.](#)

The identified barriers broadly reflect those reported in two systematic reviews limited to pregnant smokers (47) and Indigenous Australian pregnant smokers (31) and two critical reviews providing summaries of the challenges to cessation amongst low income smokers (32) and low income; rural; homeless; hard core; immigrant and HIV positive smokers (48). Addiction to nicotine, habit, stress management, enjoyment and weight gain are typically reported barriers to smoking cessation within the general population (25-27, 114). No studies were found that directly compared barriers experienced by vulnerable groups and smokers in the general population. To the authors knowledge, only one study has assessed the effect of socioeconomic position on barriers to quitting smoking and identified that decreasing SEP was associated with higher likelihood of reporting stress management and boredom as barriers (27). This review did not aim to provide direct comparisons between vulnerable groups and the general population due to the heterogeneity of studies.

1  
2  
3 Additionally, comparisons by gender were beyond the scope of this review, but should be  
4  
5 considered for further research, as socioeconomic disadvantage has differential effects on  
6  
7 males and females (19) and preliminary evidence suggests barriers to cessation may differ by  
8  
9 gender (27, 70).  
10

11  
12 Nevertheless, the novel results of this review indicate that vulnerable smokers report a  
13  
14 number of additional barriers to cessation that operate within their social and community  
15  
16 networks; living conditions; and wider cultural and socioeconomic contexts. Social and  
17  
18 community barriers include: lack of support to quit from both peers and health and other  
19  
20 professionals; high prevalence and acceptability of smoking within vulnerable communities  
21  
22 and smoking as a social activity. Living conditions include: stressful factors; pro-smoking  
23  
24 living and working circumstances; lack of access to quit resources; social and geographical  
25  
26 isolation and boredom. Cultural norms and socioeconomic disadvantage also presented  
27  
28 barriers to quitting.  
29  
30  
31  
32  
33

### 34 **Main barriers identified across all vulnerable groups**

#### 35 *Stress management*

36  
37 Stress management was a frequently reported individual level barrier. Smokers  
38  
39 typically demonstrate higher levels of stress and low mood than non-smokers and ex-smokers  
40  
41 (115-117). Smoking may provide a coping mechanism for individuals who are prone to  
42  
43 higher levels of stress (118-120) or smoking may act as a stressor due to neurobiological  
44  
45 processes or through the experience of withdrawal symptoms (120). Stressors associated with  
46  
47 vulnerable groups (for example unemployment, financial stress, and poverty) may compound  
48  
49 stress levels within vulnerable groups. Given that vulnerable smokers may be more likely to  
50  
51 report smoking in order to relieve stress (27) incorporating stress management techniques  
52  
53 into interventions targeted at vulnerable groups may help to increase cessation.  
54  
55  
56  
57  
58  
59  
60

1  
2  
3 *Lack of support to quit from health professionals and other service providers*  
4

5 At the social and community level, a lack of support to quit from health professionals  
6 and other service providers was identified. This reflects research that suggests smokers from  
7 low SEP are less likely to receive advice to quit from a healthcare provider than their more  
8 higher SEP counterparts (121), despite evidence demonstrating brief advice can increase the  
9 likelihood of successful quitting (122, 123). Both organisational and individual factors affect  
10 the provision of quit advice by health and other service providers. These include lack of time,  
11 confidence, knowledge and counselling skills (124). Efforts should be focussed on improving  
12 health professionals' ability to offer quit advice and may benefit from examining how best to  
13 ensure compliance to existing guidelines that provide clear recommendations on identifying  
14 individuals who are at higher risk of smoking and addressing the unique issues that these  
15 individuals face.  
16  
17  
18  
19  
20  
21  
22  
23  
24  
25  
26  
27  
28

29 Tailoring interventions to the specific needs of vulnerable groups may be effective.  
30 Tailored interventions for behaviour change have been found to be effective compared to no  
31 intervention or dissemination of guidelines or educational materials alone [92]. Given that  
32 this review identified three common barriers across the six vulnerable groups include in this  
33 review, we argue that subsequent smoking cessation interventions in vulnerable groups  
34 should seek to address these factors. Programs should include specific modules on stress  
35 management techniques and how best to combat stress in vulnerable groups as well as  
36 educating smokers about how stress relief and relief from nicotine withdrawal symptoms can  
37 be confounded.  
38  
39  
40  
41  
42  
43  
44  
45  
46  
47  
48

49 Smoking cessation interventions should be designed to maximise participation by  
50 vulnerable groups, addressing the key barriers around acceptability and access to  
51 interventions. Utilising existing services and organisations that are highly accessed by  
52 vulnerable groups and are a trusted source of help for vulnerable groups is also necessary.  
53  
54  
55  
56  
57  
58  
59  
60

1  
2  
3 There is accumulating evidence that social and community service organisations (SCSOs) are  
4 well placed to provide brief smoking cessation advice to highly vulnerable clients (125, 126).  
5  
6

### 7 *High prevalence and acceptability of smoking*

8  
9  
10 The high prevalence and social acceptability of smoking within vulnerable  
11 communities was frequently reported. Considerable measures have been taken to address the  
12 denormalisation of smoking in the general population through regulation and legislative  
13 changes such as restrictions in advertising, smoke-free environment policies and point of sale  
14 restriction (1, 127, 128). Participants who were homeless, experiencing mental illness and  
15 prisoners cited a lack of restrictions on smoking within their living environments (or lack of  
16 enforcement of existing policies) as a factor that reinforced their smoking. While there are  
17 challenges associated with their implementation, smoke free areas can be successfully  
18 implemented within mental health treatment centres and prisons (129-131) and there is  
19 potential to extend these restrictions to homeless shelters and public housing developments.  
20  
21  
22  
23  
24  
25  
26  
27  
28  
29  
30

31  
32 Efforts to encourage the denormalisation of smoking in the environments of  
33 vulnerable communities require further exploration. Providing access to acceptable and  
34 effective behavioural and pharmacological supports should ensure that denormalisation does  
35 not result in compounding stigma and further isolating vulnerable groups (127, 132).  
36  
37  
38  
39

### 40 **Barriers specific to certain groups**

#### 41 *Indigenous groups*

42  
43  
44  
45 Indigenous groups identified unique stressors linked to smoking including racism and  
46 historical factors; cultural practices including ceremonial use of tobacco and cultural values  
47 that promote sharing, kinship and reciprocity and the importance of smoking as a way to  
48 maintain cultural identity. Cultural values also had effects on the willingness of Indigenous  
49 participants to access smoking support services. Certain Indigenous groups may be less likely  
50 to receive advice to quit or engage with services designed to aid in cessation (133). However,  
51  
52  
53  
54  
55  
56  
57  
58  
59  
60



1  
2  
3 it is important to note that smoking cessation programs have been shown to be effective  
4  
5 within Indigenous groups (113, 134). Culturally appropriate interventions tailored to the  
6  
7 needs of Indigenous smokers should continue to be developed, implemented and evaluated.  
8  
9 These programs should acknowledge the cultural significance of tobacco use and the  
10  
11 important historical and social factors associated with Indigenous groups and smoking (135).

#### 14 *Prisoners*

15  
16 Prisoners identified unique stressors within their living conditions that contributed to  
17  
18 their smoking including social isolation, anxiety regarding legal matters and transfers to other  
19  
20 prisons. A recent multicomponent randomised controlled trial that included improving stress  
21  
22 management skills in prisoners found similar point prevalence abstinence rates as another  
23  
24 trial conducted with prisoners (9) and other community based studies (136, 137). Thus,  
25  
26 smoking cessation programs can be effective even in prison environments that are highly  
27  
28 conducive to smoking and should form a part of routine care within prison systems.  
29  
30

#### 31 *People with a mental illness*

32  
33 Low motivation to quit smoking was only reported in studies involving smokers with  
34  
35 a mental illness. This contradicts research showing no difference in motivation to quit  
36  
37 between those with severe mental illness and the general population (138). A recent review  
38  
39 concluded there is some evidence to suggest that individuals diagnosed with a psychotic  
40  
41 disorder are slightly less motivated to quit than those diagnosed with depression (138).  
42  
43 Possible reasons for this include the symptoms associated with schizophrenia (including  
44  
45 amotivation), management of side effects of medications (including Parkinsonism), limited  
46  
47 support systems, low perceived vulnerability to smoking related disease, lack of alternate  
48  
49 coping mechanisms and poverty (138, 139). Information on the diagnoses of participants was  
50  
51 only reported in one of the studies reporting motivation as a barrier in this review (92) where  
52  
53 the majority of participants were diagnosed with a psychotic disorder. However, other studies  
54  
55  
56  
57  
58  
59  
60

1  
2  
3 did not provide information on participants' diagnoses and further exploration is beyond the  
4  
5 scope of this review.  
6

7  
8 Symptom management also presented a significant barrier within studies concerning  
9  
10 people with a mental illness. There is evidence to suggest that biochemical processes between  
11  
12 nicotine and other substances in tobacco improve some symptoms of mental illness (139).  
13  
14 Additionally, smokers with a mental illness may be more likely to misattribute their  
15  
16 withdrawal symptoms as recurring mental illness symptoms. Further investigation and  
17  
18 education regarding cessation and symptom management with people with a mental illness is  
19  
20 warranted. Integrating smoking cessation care with mental health and addiction treatments  
21  
22 can be effective at promoting cessation rates in groups with mental illness (20, 30). However,  
23  
24 future studies need to investigate ways to maintain long term smoking cessation as well as  
25  
26 systems-level changes that may support smoking cessation in people with mental illness (131,  
27  
28 140).  
29  
30

### 31 32 **Barriers to smoking cessation in vulnerable groups: a model**

33  
34 Figure 2 visually demonstrates the broad range of barriers to cessation reported by vulnerable  
35  
36 groups, many of which exist outside of the realm of the individual. This model demonstrates  
37  
38 the interconnectedness of individual and lifestyle factors with the wider social and  
39  
40 community factors, living conditions and cultural, socioeconomic and environmental factors.  
41  
42 The two darker spheres holding social and community networks and individual and lifestyle  
43  
44 factors identify those factors that are potentially modifiable through short term health  
45  
46 behaviour change interventions. This model does not provide an exhaustive list of all of the  
47  
48 factors that prevent vulnerable individuals from smoking cessation. It does provide a  
49  
50 framework for understanding the perceived self-reported barriers to quitting smoking  
51  
52 identified in this review.  
53  
54  
55  
56  
57  
58  
59  
60

### Strengths and limitations

This synthesis of the literature provides evidence of the perceived barriers to smoking cessation by examining the methodological quality of studies and comparing between and within selected vulnerable groups. However, this review has some limitations. While the overall quality of the studies included in this review was acceptable, most qualitative studies failed to provide information regarding the trustworthiness of the research and most quantitative studies failed to provide information on the validity and reliability of the measures used to assess barriers. Of quantitative studies included, the majority used convenience samples. It is not generally feasible to target vulnerable and hard to reach populations using random population sampling procedures. This limits the generalizability and transferability of the included studies to wider vulnerable populations. Nevertheless, the agreement in findings between qualitative studies does suggest that these results are robust.

The nature of the studies included in this review means that no weight is given to the different barriers and the authors cannot provide comment on which, if any, barriers should be made a priority to target in smoking cessation interventions with vulnerable groups. Given limited resources and funds, addressing all barriers is rarely possible. Future research is needed to identify those barriers which are most important to address first and to prioritise resourcing and intervention development.

The results of this review were broadly categorised according to the SDHF, however these categories are not mutually exclusive and certain barriers were able to be included in multiple categories (for example stress and stressful factors could be categorised as either individual level barriers or barriers within the living conditions level). The reviewed studies do not directly clarify whether the nature of stress experienced in vulnerable groups is personal or contextual. Constructs such as coping and resilience (140, 141) have been hypothesised as mediators between stress and smoking in low socioeconomic groups (142).

1  
2  
3 Similarly, as this review sought to provide a summary of vulnerable smokers'  
4 perceived self-reported barriers to cessation, other barriers which may be important  
5 determinants of quit attempts and success were not considered. Barriers such as the  
6 knowledge and attitudes of staff and health professionals and the capacity of services to offer  
7 smoking cessation programs, which have been identified within the literature (124), should  
8 also be considered when examining the challenges facing vulnerable groups.  
9

10  
11 This review was only able to identify four studies that examined the barriers to  
12 quitting smoking within prisoner (n=2 studies) and homeless (n=2) groups and one study  
13 focussing on at-risk youth. These results indicate more research is required with these groups  
14 to examine the barriers to smoking cessation. More studies investigating the barriers to  
15 cessation within these groups may lead to identification of additional common and unique  
16 barriers across vulnerable groups. Additionally, this review was limited to studies conducted  
17 within one of six vulnerable groups. Other groups that show high rates of smoking include  
18 lesbian, gay, bisexual and transgender groups (143); culturally and linguistically diverse  
19 groups (144); and rural and remote communities (145). The authors acknowledge the  
20 disparity in smoking prevalence in these groups, however their inclusion would have  
21 increased the breadth of the review to a level that would be too broad and complex to be  
22 useful. These groups may experience barriers to cessation different to those experienced by  
23 the groups included in this review. It should also be noted that individuals within the included  
24 groups often experience multiple forms of disadvantage for example people who are  
25 homeless are more likely to experience a mental illness (146) and Indigenous communities  
26 are more likely to be overrepresented in lower socioeconomic positions (3).  
27  
28  
29  
30  
31  
32  
33  
34  
35  
36  
37  
38  
39  
40  
41  
42  
43  
44  
45  
46  
47  
48  
49  
50

## 51 **Conclusions**

52  
53 These results support findings that vulnerable groups experience common barriers to  
54 smoking cessation, and also barriers which are unique to specific vulnerable groups. Stress  
55  
56  
57  
58  
59  
60

1  
2  
3 management, high prevalence and acceptability of smoking and lack of support to quit were  
4 identified as priority areas for cessation research, program implementation and policy change.  
5  
6 Many of the barriers identified within this review are modifiable through short term health  
7  
8 behaviour change strategies. For heterogeneous groups of vulnerable individuals, intervention  
9  
10 development should seek to address those barriers common to all vulnerable groups identified  
11  
12 in this review. For relatively homogenous groups of vulnerable individuals, interventions  
13  
14 should seek to address the unique barriers faced by those groups in addition to those barriers  
15  
16 identified as common to all vulnerable groups.  
17  
18  
19

20  
21 These findings, coupled with lower success rates in quitting within vulnerable groups  
22 relative to the success rates in more advantaged groups (13, 147), suggest that interventions  
23  
24 with vulnerable groups need to address wider social, community and cultural factors as well  
25  
26 as individualised cessation support. Addressing the predictors of cessation found within the  
27  
28 general population such as nicotine dependence and enjoyment remain important for  
29  
30 vulnerable groups.  
31  
32  
33  
34  
35

### 36 **Acknowledgements:**

37  
38 We are grateful to Research Assistant (RA) Ms Madeleine Randell and to Dr Michelle  
39  
40 Anderson for providing valuable comment on draft manuscripts.  
41  
42

43 **Contributorship statement:** All authors conceived the initial scope and subject of the  
44  
45 review. LT carried out all searches, wrote up drafts and performed quality assessment. BB,  
46  
47 CP and JB provided extensive feedback and contributions to drafts of the paper. All authors  
48  
49 completed quality assessment of the included papers. BB and LT completed narrative  
50  
51 synthesis. All authors have read and met the ICMJE criteria for authorship.  
52  
53

54 **Competing interests:** All authors have completed the Unified Competing Interest Form at  
55  
56 [www.icmje.org/coi\\_disclosure.pdf](http://www.icmje.org/coi_disclosure.pdf) (available on request from the corresponding author) and declare  
57  
58  
59  
60

1  
2  
3 that: no support from any organisation for the submitted work; no financial relationships with any  
4  
5 organisations that might have an interest in the submitted work in the previous three years; no other  
6  
7 relationships or activities that could appear to have influenced the submitted work.  
8

9 **Funding:** BB is supported by a Cancer Institute NSW Career Development Fellowship and a  
10  
11 University of Newcastle Faculty of Health and Medicine Gladys M Brawn Career Development  
12  
13 Fellowship. JB is supported by an Australian Research Council Post-Doctoral Industry Fellowship.  
14  
15 CP is supported by Newcastle Cancer Control Collaborative funding. LT is supported by a 50:50  
16  
17 scholarship from the University of Newcastle Faculty of Health and Medicine and the Cancer Institute  
18  
19 NSW.  
20

21 **Data sharing:** There are no additional data available.  
22  
23  
24  
25  
26  
27  
28  
29  
30  
31  
32  
33  
34  
35  
36  
37  
38  
39  
40  
41  
42  
43  
44  
45  
46  
47  
48  
49  
50  
51  
52  
53  
54  
55  
56  
57  
58  
59  
60

## REFERENCES

1. World Health Organization (WHO). WHO report on the Global Tobacco Epidemic. Geneva: 2008.
2. Australian Institute of Health and Welfare (AIHW). 2010 National Drug Strategy Household Survey: Detailed findings. Canberra: 2010 Contract No.: Cat. no. PHE145.
3. Australian Institute of Health and Welfare. The health and welfare of Australia's Aboriginal and Torres Strait Islander people, an overview 2011. Canberra: 2011 Contract No.: Cat. no. IHW 42.
4. Centers for Disease Control Prevention (CDCP). Current cigarette smoking among adults - United States, 2011. *MMWR Morb Mortal Wkly Rep.* 2012;61(44):889-94. Epub 2012/11/09.
5. Statistics Canada. Canadian Community Health Survey 2000/01 Ottawa: Statistics Canada, 2001.
6. Lawrence D, Mitrou F, Zubrick SR. Smoking and mental illness: results from population surveys in Australia and the United States. *BMC Public Health.* 2009;9:285. Epub 2009/08/12.
7. Kelly P, Baker AL, Deane FP, Kay-Lambkin FJ, Bonevski B, Tregarthen J. Prevalence of smoking and other health risk factors in people attending residential substance abuse treatment. *Drug Alcohol Rev.* 2012;31(5):638-44. doi: 10.1111/j.465-3362.2012.00465.x. Epub 2012 May 30.
8. Baggett TP, Rigotti NA. Cigarette smoking and advice to quit in a national sample of homeless adults. *Am J Prev Med.* 2010;39(2):164-72. Epub 2010/07/14.
9. Cropsey K, Eldridge G, Weaver M, Villalobos G, Stitzer M, Best A. Smoking cessation intervention for female prisoners: addressing an urgent public health need. *Am J Public Health.* 2008;98(10):1894-901. Epub 2008/08/16.
10. Indig D, Topp L, Ross B, Mamoon H, Border B, Kumar S, et al. 2009 NSW Inmate Health Survey: Key Findings Report Sydney: Justice Health, 2010.
11. McLachlan R, Gilfillan G, Gordon J. Deep and Persistent Disadvantage in Australia. Canberra: 2013.
12. Hyland A, Borland R, Li Q, Yong HH, McNeill A, Fong GT, et al. Individual-level predictors of cessation behaviours among participants in the International Tobacco Control (ITC) Four Country Survey. *Tob Control.* 2006;15 Suppl 3:iii83-94. Epub 2006/06/07.
13. Kotz D, West R. Explaining the social gradient in smoking cessation: it's not in the trying, but in the succeeding. *Tob Control.* 2009;18(1):43-6.
14. Gilman SE, Martin LT, Abrams DB, Kawachi I, Kubzansky L, Loucks EB, et al. Educational attainment and cigarette smoking: a causal association? *Int J Epidemiol.* 2008;37(3):615-24. Epub 2008/01/09.
15. Hatziafreu EJ, Pierce JP, Lefkopoulou M, Fiore MC, Mills SL, Novotny TE, et al. Quitting smoking in the United States in 1986. *J Natl Cancer Inst.* 1990;82(17):1402-6. Epub 1990/09/05.
16. Levy DT, Romano E, Mumford E. The relationship of smoking cessation to sociodemographic characteristics, smoking intensity, and tobacco control policies. *Nicotine Tob Res.* 2005;7(3):387-96. Epub 2005/08/09.
17. Reid JL, Hammond D, Boudreau C, Fong GT, Siahpush M, Collaboration ITC. Socioeconomic disparities in quit intentions, quit attempts, and smoking abstinence among smokers in four western countries: findings from the International Tobacco Control Four Country Survey. *Nicotine Tob Res.* 2010;12 Suppl:S20-33. Epub 2010/10/15.
18. Giskes K, van Lenthe FJ, Turrell G, Brug J, Mackenbach JP. Smokers living in deprived areas are less likely to quit: a longitudinal follow-up. *Tob Control.* 2006;15(6):485-8. Epub 2006/11/30.
19. Graham H, Inskip HM, Francis B, Harman J. Pathways of disadvantage and smoking careers: evidence and policy implications. *J Epidemiol Community Health.* 2006;60 Suppl 2:7-12. Epub 2007/08/22.
20. Hiscock R, Bauld L, Amos A, Fidler JA, Munafo M. Socioeconomic status and smoking: a review. *Ann N Y Acad Sci.* 2012;1248:107-23. Epub 2011/11/19.
21. Melnyk KA. Barriers: a critical review of recent literature. *Nurs Res.* 1988;37(4):196-201. Epub 1988/07/01.

- 1  
2  
3 22. Dahlgren G, & Whitehead, M. . Policies and strategies to promote equity in health.  
4 Copenhagen: 1992.
- 5 23. Marmot M. Social determinants of health inequalities. *Lancet*. 2005;365(9464):1099-104.  
6 Epub 2005/03/23.
- 7 24. Theobald W, Smith, SS., Fiore, M. . Insights: Smoking in Wisconsin. University of Wisconsin  
8 Medical School: UW Center for Tobacco Research and Intervention, 2002.
- 9 25. Guirguis AB, Ray SM, Zingone MM, Airee A, Franks AS, Keenum AJ. Smoking cessation:  
10 barriers to success and readiness to change. *Tenn Med*. 2010;103(9):45-9. Epub 2010/12/09.
- 11 26. Orleans CT, Jepson C, Resch N, Rimer BK. Quitting motives and barriers among older  
12 smokers. The 1986 Adult Use of Tobacco Survey revisited. *Cancer*. 1994;74(7 Suppl):2055-61. Epub  
13 1994/10/01.
- 14 27. Fidler JA, West R. Self-perceived smoking motives and their correlates in a general  
15 population sample. *Nicotine Tob Res*. 2009;11(10):1182-8. Epub 2009/07/31.
- 16 28. Poland B, Frohlich K, Haines RJ, Mykhalovskiy E, Rock M, Sparks R. The social context of  
17 smoking: the next frontier in tobacco control? *Tob Control*. 2006;15(1):59-63. Epub 2006/01/27.
- 18 29. Paul CL, Ross S, Bryant J, Hill W, Bonevski B, Keevy N. The social context of smoking: A  
19 qualitative study comparing smokers of high versus low socioeconomic position. *BMC Public Health*.  
20 2010;10:211. Epub 2010/04/28.
- 21 30. Rodriguez D, Carlos HA, Adachi-Mejia AM, Berke EM, Sargent JD. Predictors of tobacco  
22 outlet density nationwide: a geographic analysis. *Tob Control*. 2013;22(5):349-55. Epub 2012/04/12.
- 23 31. Gould GS, Munn J, Watters T, McEwen A, Clough AR. Knowledge and views about maternal  
24 tobacco smoking and barriers for cessation in Aboriginal and Torres Strait Islanders: A systematic  
25 review and meta-ethnography. *Nicotine Tob Res*. 2013;15(5):863-74. Epub 2012/10/09.
- 26 32. Gollust SE, Schroeder SA, Warner KE. Helping smokers quit: understanding the barriers to  
27 utilization of smoking cessation services. *Milbank Q*. 2008;86(4):601-27. Epub 2009/01/06.
- 28 33. Wiebel WW. Identifying and gaining access to hidden populations. *NIDA Res Monogr*.  
29 1990;98:4-11. Epub 1990/01/01.
- 30 34. Australian National Preventive Health Agency. A priority-driven research agenda for tobacco  
31 control in Australia. 2013.
- 32 35. World Health Organisation. Report on the global tobacco epidemic, 2013. 2013.
- 33 36. U.S. Department of Health and Human Services. Ending the tobacco Epidemic: A tobacco  
34 control strategic action plan for the U.S. Department of Health and Human Services. In: Office of the  
35 Assistant Secretary for Health, editor. Washington, DC. November, 2010. .
- 36 37. Moher D, Liberati A, Tetzlaff J, Altman DG, Group P. Preferred reporting items for systematic  
37 reviews and meta-analyses: the PRISMA statement. *PLoS Med*. 2009;6(7):e1000097. Epub  
38 2009/07/22.
- 39 38. Tong A, Flemming K, McInnes E, Oliver S, Craig J. Enhancing transparency in reporting the  
40 synthesis of qualitative research: ENTREQ. *BMC Med Res Methodol*. 2012;12:181. Epub 2012/11/29.
- 41 39. Carson KV, Brinn MP, Peters M, Veale A, Esterman AJ, Smith BJ. Interventions for smoking  
42 cessation in Indigenous populations. *Cochrane Database Syst Rev*. 2012;1:CD009046. Epub  
43 2012/01/20.
- 44 40. Cunningham C, Stanley F. Indigenous by definition, experience, or world view. *BMJ*.  
45 2003;327(7412):403-4. Epub 2003/08/23.
- 46 41. Letts L, Wilkins S, Stewart D, Bosch J, Westmorland M. Critical Review Form - Qualitative  
47 Studies (Version 2.0). McMaster University; 2007; Available from:  
48 <http://www.fhs.mcmaster.ca/rehab/ebp/>.
- 49 42. Barley EA, Murray J, Walters P, Tylee A. Managing depression in primary care: A meta-  
50 synthesis of qualitative and quantitative research from the UK to identify barriers and facilitators.  
51 *BMC Fam Pract*. 2011;12:47. Epub 2011/06/11.
- 52 43. O'Cathain A, Murphy E, Nicholl J. The quality of mixed methods studies in health services  
53 research. *J Health Serv Res Policy*. 2008;13(2):92-8. Epub 2008/04/18.
- 54  
55  
56  
57  
58  
59  
60



- 1
- 2
- 3 44. Popay J, Roberts H, Sowden A, Petticrew M, Arai L, Rodgers M, et al. Guidance on the
- 4 Conduct of Narrative Synthesis in Systematic Reviews. 2006.
- 5 45. Rumrill Jr PD, Fitzgerald SM. Using narrative literature reviews to build a scientific knowledge
- 6 base. *Work*. 2001;16(2):165-70. Epub 2002/11/21.
- 7 46. Denyer D, & Tranfield, D. Using qualitative research synthesis to build an actionable
- 8 knowledge base. *Manage Decis*. 2006;44(2):213-27.
- 9 47. Ingall G, Cropley M. Exploring the barriers of quitting smoking during pregnancy: a
- 10 systematic review of qualitative studies. *Women Birth*. 2010;23(2):45-52. Epub 2009/11/03.
- 11 48. Browning K, Baker, CJ., McNally, GA., Wewers, ME. . Nursing research in tobacco use and
- 12 special populations. *Annu Rev Nurs Res*. 2009;27:319-42.
- 13 49. Ahijevych K, Kuun P, Christman S, Wood T, Browning K, Wewers ME. Beliefs about tobacco
- 14 among Appalachian current and former users. *Appl Nurs Res*. 2003;16(2):93-102. Epub 2003/05/24.
- 15 50. Bancroft A, Wiltshire S, Parry O, Amos A. "It's like an addiction first thing...afterwards it's like
- 16 a habit": daily smoking behaviour among people living in areas of deprivation. *Soc Sci Med*.
- 17 2003;56(6):1261-7. Epub 2003/02/26.
- 18 51. Beech BM, Scarinci IC. Smoking attitudes and practices among low-income African-
- 19 Americans: qualitative assessment of contributing factors. *Am J Health Promot*. 2003;17(4):240-8.
- 20 Epub 2003/03/19.
- 21 52. Bryant J, Bonevski B, Paul C, O'Brien J, Oakes W. Developing cessation interventions for the
- 22 social and community service setting: a qualitative study of barriers to quitting among
- 23 disadvantaged Australian smokers. *BMC Public Health*. 2011;11:493. Epub 2011/06/28.
- 24 53. Copeland L. An exploration of the problems faced by young women living in disadvantaged
- 25 circumstances if they want to give up smoking: can more be done at general practice level? *Fam*
- 26 *Pract*. 2003;20(4):393-400. Epub 2003/07/24.
- 27 54. Dunn CL, Pirie PL, Lando HA. Attitudes and perceptions related to smoking among pregnant
- 28 and postpartum women in a low-income, multiethnic setting. *Am J Health Promot*. 1998;12(4):267-
- 29 74. Epub 1998/02/06.
- 30 55. Franco L, Welsby D, Eccleston P, Furber S. A qualitative study about smoking cessation with
- 31 clients of community service organisations that work with disadvantaged families. *Health Promot J*
- 32 *Austr*. 2011;22(2):153-5. Epub 2011/08/09.
- 33 56. Lacey LP, Manfredi C, Balch G, Warnecke RB, Allen K, Edwards C. Social support in smoking
- 34 cessation among black women in Chicago public housing. *Public Health Rep*. 1993;108(3):387-94.
- 35 57. Moffatt J, Whip R, Moffatt J. The Struggle to Quit: Barriers and Incentives to Smoking
- 36 Cessation. *Health Educ J*. 2004;63(2):101-12.
- 37 58. Nichter M, Nichter M, Muramoto M, Adrian S, Goldade K, Tesler L, et al. Smoking among
- 38 low-income pregnant women: an ethnographic analysis. *Health Educ Behav*. 2007;34(5):748-64.
- 39 Epub 2007/01/04.
- 40 59. Peretti-Watel P, Constance J. "It's all we got left". Why poor smokers are less sensitive to
- 41 cigarette price increases. *Int J Environ Res Public Health*. 2009;6(2):608-21. Epub 2009/05/15.
- 42 60. Price JH, Everett SA. Perceptions of lung cancer and smoking in an economically
- 43 disadvantaged population. *J Community Health*. 1994;19(5):361-75. Epub 1994/10/01.
- 44 61. Roddy E, Antoniak M, Britton J, Molyneux A, Lewis S. Barriers and motivators to gaining
- 45 access to smoking cessation services amongst deprived smokers--a qualitative study. *BMC Health*
- 46 *Serv Res*. 2006;6:147. Epub 2006/11/08.
- 47 62. Stead M, MacAskill S, MacKintosh AM, Reece J, Eadie D. "It's as if you're locked in":
- 48 qualitative explanations for area effects on smoking in disadvantaged communities. *Health Place*.
- 49 2001;7(4):333-43. Epub 2001/10/30.
- 50 63. Stewart MJ, Brosky G, Gillis A, Jackson S, Johnston G, Kirkland S, et al. Disadvantaged women
- 51 and smoking. *Can J Public Health*. 1996;87(4):257-60.
- 52 64. Stewart MJ, Gillis A, Brosky G, Johnston G, Kirkland S, Leigh G, et al. Smoking among
- 53 disadvantaged women: causes and cessation. *Can J Nurs Res*. 1996;28(1):41-60.
- 54
- 55
- 56
- 57
- 58
- 59
- 60

- 1  
2  
3 65. Stewart MJ, Greaves L, Kushner KE, Letourneau NL, Spitzer DL, Boscoe M. Where there is  
4 smoke, there is stress: low-income women identify support needs and preferences for smoking  
5 reduction. *Health Care Women Int.* 2011;32(5):359-83. Epub 2011/04/09.
- 6 66. Stillman FA, Bone L, Avila-Tang E, Smith K, Yancey N, Street C, et al. Barriers to smoking  
7 cessation in inner-city African American young adults. *Am J Public Health.* 2007;97(8):1405-8. Epub  
8 2007/06/30.
- 9 67. Tod AM. Barriers to smoking cessation in pregnancy: a qualitative study. *Br J Community  
10 Nurs.* 2003;8(2):56-64. Epub 2003/02/18.
- 11 68. Tsourtos G, Ward, PR., Muller, R. . Smoking and stress: the double edged sword of living in a  
12 disadvantaged area. *Australasian Medical Journal.* 2008;1(1).
- 13 69. Wiltshire S, Bancroft A, Parry O, Amos A. 'I came back here and started smoking again':  
14 perceptions and experiences of quitting among disadvantaged smokers. *Health Educ Res.*  
15 2003;18(3):292-303. Epub 2003/06/28.
- 16 70. Rosenthal L, Carroll-Scott A, Earnshaw VA, Sackey N, O'Malley SS, Santilli A, et al. Targeting  
17 cessation: understanding barriers and motivations to quitting among urban adult daily tobacco  
18 smokers. *Addict Behav.* 2013;38(3):1639-42. Epub 2012/12/21.
- 19 71. White S, Baird W. Disadvantaged former miners' perspectives on smoking cessation: A  
20 qualitative study. *Health Educ J.* 2013;72(6):755-60.
- 21 72. Burgess D, Fu SS, Joseph AM, Hatsukami DK, Solomon J, van Ryn M. Beliefs and experiences  
22 regarding smoking cessation among American Indians. *Nicotine Tob Res.* 2007;9 Suppl 1:S19-28.  
23 Epub 2007/03/17.
- 24 73. Choi WS, Daley CM, James A, Thomas J, Schupbach R, Segraves M, et al. Beliefs and attitudes  
25 regarding smoking cessation among American Indians: a pilot study. *Ethn Dis.* 2006;16(1):35-40.  
26 Epub 2006/04/08.
- 27 74. Dawson AP, Cargo M, Stewart H, Chong A, Daniel M. Aboriginal health workers experience  
28 multilevel barriers to quitting smoking: a qualitative study. *Int J Equity Health.* 2012;11:27. Epub  
29 2012/05/25.
- 30 75. Dawson AP, Cargo M, Stewart H, Chong A, Daniel M. "I know it's bad for me and yet I do it":  
31 exploring the factors that perpetuate smoking in Aboriginal Health Workers--a qualitative study.  
32 *BMC Health Serv Res.* 2012;12:102. Epub 2012/04/27.
- 33 76. Dennis MK, Momper SL. "It's bad around here now": tobacco, alcohol and other drug use  
34 among American Indians living on a rural reservation. *J Ethn Subst Abuse.* 2012;11(2):130-48. Epub  
35 2012/06/12.
- 36 77. Fernandez C, Wilson D. Maori women's views on smoking cessation initiatives. *Nurs Prax N Z.*  
37 2008;24(2):27-40. Epub 2008/09/25.
- 38 78. Fu SS, Burgess D, van Ryn M, Hatsukami DK, Solomon J, Joseph AM. Views on smoking  
39 cessation methods in ethnic minority communities: a qualitative investigation. *Prev Med.*  
40 2007;44(3):235-40. Epub 2006/12/19.
- 41 79. Glover M. Analysing smoking using Te Whare Tapa Wha. *NZ J Psychol.* 2005;34(1):13-9.
- 42 80. Gould GS, Munn J, Avuri S, Hoff S, Cadet-James Y, McEwen A, et al. "Nobody smokes in the  
43 house if there's a new baby in it": Aboriginal perspectives on tobacco smoking in pregnancy and in  
44 the household in regional NSW Australia. *Women Birth.* 2013;26(4):246-53.
- 45 81. Gryczynski J, Feldman R, Carter-Pokras O, Kanamori M, Chen L, Roth S. Contexts of tobacco  
46 use and perspectives on smoking cessation among a sample of urban American Indians. *J Health  
47 Care Poor Underserved.* 2010;21(2):544-58. Epub 2010/05/11.
- 48 82. Hodge FS, Struthers R. Persistent smoking among Northern Plains Indians: lenient attitudes,  
49 low harm value, and partiality toward cigarette smoking. *J Cult Divers.* 2006;13(4):181-5. Epub  
50 2007/03/07.
- 51 83. Johnston V, Thomas DP. Smoking behaviours in a remote Australian Indigenous community:  
52 the influence of family and other factors. *Soc Sci Med.* 2008;67(11):1708-16. Epub 2008/10/22.
- 53  
54  
55  
56  
57  
58  
59  
60

- 1  
2  
3 84. Kaholokula J, L. BK, Santos JI, Chang HK. Culturally informed smoking cessation strategies for  
4 Native Hawaiians. *Nicotine Tob Res.* 2008;10(4):671-81. Epub 2009/03/21.
- 5 85. Passey ME, Gale JT, Sanson-Fisher RW. "It's almost expected": rural Australian Aboriginal  
6 women's reflections on smoking initiation and maintenance: a qualitative study. *BMC Womens*  
7 *Health.* 2011;11:55. Epub 2011/12/14.
- 8 86. Patten CA, Enoch C, Renner CC, Offord KP, Nevak C, Kelley SF, et al. Focus groups of Alaska  
9 Native adolescent tobacco users: preferences for tobacco cessation interventions and barriers to  
10 participation. *Health Educ Behav.* 2009;36(4):711-23. Epub 2007/12/01.
- 11 87. Wood L, France K, Hunt K, Eades S, Slack-Smith L. Indigenous women and smoking during  
12 pregnancy: knowledge, cultural contexts and barriers to cessation. *Soc Sci Med.* 2008;66(11):2378-  
13 89. Epub 2008/03/04.
- 14 88. Carosella AM, Ossip-Klein DJ, Owens CA. Smoking attitudes, beliefs, and readiness to change  
15 among acute and long term care inpatients with psychiatric diagnoses. *Addict Behav.*  
16 1999;24(3):331-44. Epub 1999/07/10.
- 17 89. Davis K, Brunette M, Vorhies V, Ferron J, Whitley R. A qualitative study of how individuals  
18 with severe mental illness assess smoking risks. *Mental Health and Substance Use.* 2010;3(2):110-23.
- 19 90. Goldberg JO, Moll S, Washington A. Exploring the Challenge of Tobacco Use and  
20 Schizophrenia. *Psychiatric Rehabilitation Skills.* 1996;1(2):55-67.
- 21 91. Howard LM, Bekele D, Rowe M, Demilew J, Bewley S, Marteau TM. Smoking cessation in  
22 pregnant women with mental disorders: a cohort and nested qualitative study. *BJOG.*  
23 2013;120(3):362-70. Epub 2012/11/22.
- 24 92. Kerr S, Woods C, Knussen C, Watson H, Hunter R. Breaking the habit: a qualitative  
25 exploration of barriers and facilitators to smoking cessation in people with enduring mental health  
26 problems. *BMC Public Health.* 2013;13:221. Epub 2013/03/19.
- 27 93. Lawn SJ, Pols RG, Barber JG. Smoking and quitting: a qualitative study with community-living  
28 psychiatric clients. *Soc Sci Med.* 2002;54(1):93-104. Epub 2002/02/01.
- 29 94. Lucksted A, Dixon LB, Sembly JB. A focus group pilot study of tobacco smoking among  
30 psychosocial rehabilitation clients. *Psychiatr Serv.* 2000;51(12):1544-8. Epub 2000/11/30.
- 31 95. Morris CD, Waxmonsky JA, May MG, Giese AA. What do persons with mental illnesses need  
32 to quit smoking? Mental health consumer and provider perspectives. *Psychiatr Rehabil J.*  
33 2009;32(4):276-84. Epub 2009/04/07.
- 34 96. Nawaz S, Frounfelker R, Ferron JC, Carpenter-Song EA, Davis K, Brunette MF. Smoking and  
35 Quitting Beliefs, Attitudes, and Behaviors Among Smokers With Severe Mental Illness From Three  
36 Race/Ethnicity Groups. *Journal of Dual Diagnosis.* 2012;8(3):180-7.
- 37 97. Snyder M, McDevitt J, Painter S. Smoking cessation and serious mental illness. *Arch Psychiatr*  
38 *Nurs.* 2008;22(5):297-304. Epub 2008/09/24.
- 39 98. Solway ES. The lived experiences of tobacco use, dependence, and cessation: insights and  
40 perspectives of people with mental illness. *Health Soc Work.* 2011;36(1):19-32. Epub 2011/03/31.
- 41 99. Tsourtos G, Ward PR, Muller R, Lawn S, Winefield AH, Hersh D, et al. The importance of  
42 resilience and stress to maintaining smoking abstinence and cessation: a qualitative study in  
43 Australia with people diagnosed with depression. *Health Soc Care Community.* 2011;19(3):299-306.  
44 Epub 2010/12/09.
- 45 100. Van Dongen CJ. Smoking and persistent mental illness: an exploratory study. *J Psychosoc*  
46 *Nurs Ment Health Serv.* 1999;37(11):26-34. Epub 1999/11/26.
- 47 101. Asher MK, Martin RA, Rohsenow DJ, MacKinnon SV, Traficante R, Monti PM. Perceived  
48 barriers to quitting smoking among alcohol dependent patients in treatment. *J Subst Abuse Treat.*  
49 2003;24(2):169-74. Epub 2003/05/15.
- 50 102. Clancy N, Zwar N, Richmond R. Depression, smoking and smoking cessation: A qualitative  
51 study. *Fam Pract.* 2013;30(5):587-92.
- 52  
53  
54  
55  
56  
57  
58  
59  
60

- 1  
2  
3 103. Prochaska JJ, Fromont SC, Wa C, Matlow R, Ramo DE, Hall SM. Tobacco use and its  
4 treatment among young people in mental health settings: A qualitative analysis. *Nicotine Tob Res.*  
5 2013;15(8):1427-35.  
6 104. Orleans CT, Hutchinson D. Tailoring nicotine addiction treatments for chemical dependency  
7 patients. *J Subst Abuse Treat.* 1993;10(2):197-208. Epub 1993/03/01.  
8 105. Ratschen E, Britton J, Doody G, McNeill A. Smoking attitudes, behaviour and nicotine  
9 dependence among mental health acute inpatients: an exploratory study. *Int J Soc Psychiatry.*  
10 2010;56(2):107-18. Epub 2010/03/09.  
11 106. Arnsten JH, Reid K, Bierer M, Rigotti N. Smoking behavior and interest in quitting among  
12 homeless smokers. *Addict Behav.* 2004;29(6):1155-61. Epub 2004/07/09.  
13 107. Connor SE, Cook RL, Herbert MI, Neal SM, Williams JT. Smoking cessation in a homeless  
14 population: there is a will, but is there a way? *J Gen Intern Med.* 2002;17(5):369-72. Epub  
15 2002/06/06.  
16 108. Okuyemi KS, Caldwell AR, Thomas JL, Born W, Richter KP, Nollen N, et al. Homelessness and  
17 smoking cessation: insights from focus groups. *Nicotine Tob Res.* 2006;8(2):287-96. Epub  
18 2006/06/13.  
19 109. Dickens GL S, JH, Haw, CM. . Smoking in a forensic psychiatric service: a survey of inpatients'  
20 views. *J Psychiatr Ment Health Nurs.* 2005;12(6):672-8; quiz 8.  
21 110. Richmond R, Butler T, Wilhelm K, Wodak A, Cunningham M, Anderson I. Tobacco in prisons:  
22 a focus group study. *Tob Control.* 2009;18(3):176-82. Epub 2009/02/04.  
23 111. Lewis S, Russell A. Young smokers' narratives: public health, disadvantage and structural  
24 violence. *Sociol Health Illn.* 2013;35(5):746-60.  
25 112. Garner L, Ratschen E. Tobacco smoking, associated risk behaviours, and experience with  
26 quitting: a qualitative study with homeless smokers addicted to drugs and alcohol. *BMC Public*  
27 *Health.* 2013;13:951. Epub 2013/10/12.  
28 113. Patten CA. Tobacco cessation intervention during pregnancy among Alaska Native women. *J*  
29 *Cancer Educ.* 2012;27 Suppl 1:S86-90. Epub 2012/02/09.  
30 114. Bott MJ, Cobb AK, Scheibmeir MS, O'Connell KA. Quitting: Smokers Relate their Experiences.  
31 *Qual Health Res.* 1997;7(2):255-69.  
32 115. File SE, Dinnis AK, Heard JE, Irvine EE. Mood differences between male and female light  
33 smokers and nonsmokers. *Pharmacol Biochem Behav.* 2002;72(3):681-9. Epub 2002/08/15.  
34 116. Hajek P, Taylor T, McRobbie H. The effect of stopping smoking on perceived stress levels.  
35 *Addiction.* 2010;105(8):1466-71. Epub 2010/06/10.  
36 117. Mulder I, Tijhuis M, Smit HA, Kromhout D. Smoking cessation and quality of life: the effect of  
37 amount of smoking and time since quitting. *Prev Med.* 2001;33(6):653-60. Epub 2001/11/22.  
38 118. Carmody TP. Affect regulation, nicotine addiction, and smoking cessation. *J Psychoactive*  
39 *Drugs.* 1992;24(2):111-22. Epub 1992/04/01.  
40 119. DiFranza JR, Wellman RJ. A sensitization-homeostasis model of nicotine craving, withdrawal,  
41 and tolerance: integrating the clinical and basic science literature. *Nicotine Tob Res.* 2005;7(1):9-26.  
42 Epub 2005/04/05.  
43 120. Parrott AC. Does cigarette smoking cause stress? *Am Psychol.* 1999;54(10):817-20. Epub  
44 1999/11/30.  
45 121. Browning KK, Ferketich AK, Salsberry PJ, Wewers ME. Socioeconomic disparity in provider-  
46 delivered assistance to quit smoking. *Nicotine Tob Res.* 2008;10(1):55-61. Epub 2008/01/12.  
47 122. Aveyard P, Begh R, Parsons A, West R. Brief opportunistic smoking cessation interventions: a  
48 systematic review and meta-analysis to compare advice to quit and offer of assistance. *Addiction.*  
49 2012;107(6):1066-73. Epub 2011/12/20.  
50 123. Stead LF, Buitrago D, Preciado N, Sanchez G, Hartmann-Boyce J, Lancaster T. Physician  
51 advice for smoking cessation. *Cochrane Database Syst Rev.* 2013;5:CD000165. Epub 2013/06/04.  
52  
53  
54  
55  
56  
57  
58  
59  
60

- 1  
2  
3 124. Stead M, Angus K, Holme I, Cohen D, Tait G, Team PER. Factors influencing European GPs'  
4 engagement in smoking cessation: a multi-country literature review. *Br J Gen Pract*.  
5 2009;59(566):682-90. Epub 2009/08/14.  
6 125. Bryant J, Bonevski B, Paul C, Hull P, O'Brien J. Implementing a smoking cessation program in  
7 social and community service organisations: a feasibility and acceptability trial. *Drug Alcohol Rev*.  
8 2012;31(5):678-84. Epub 2011/12/08.  
9 126. Christiansen BA, Brooks M, Keller PA, Theobald WE, Fiore MC. Closing tobacco-related  
10 disparities: Using community organizations to increase consumer demand. *Am J Prev Med*.  
11 2010;38(3 Suppl):S397-402. Epub 2010/03/05.  
12 127. Bell K, Salmon A, Bowers M, Bell J, McCullough L. Smoking, stigma and tobacco  
13 'denormalization': Further reflections on the use of stigma as a public health tool. A commentary on  
14 *Social Science & Medicine's Stigma, Prejudice, Discrimination and Health Special Issue (67: 3)*. *Soc Sci*  
15 *Med*. 2010;70(6):795-9; discussion 800-1. Epub 2010/01/02.  
16 128. Lavack L. Denormalization of tobacco in Canada. *Social Marketing Quarterly*. 1999;5(3):82-5.  
17 129. El-Guebaly N, Cathcart J, Currie S, Brown D, Gloster S. Public health and therapeutic aspects  
18 of smoking bans in mental health and addiction settings. *Psychiatr Serv*. 2002;53(12):1617-22. Epub  
19 2002/12/04.  
20 130. Williams JM, Ziedonis D. Addressing tobacco among individuals with a mental illness or an  
21 addiction. *Addict Behav*. 2004;29(6):1067-83. Epub 2004/07/09.  
22 131. Ziedonis DM, Guydish J, Williams J, Steinberg M, Foulds J. Barriers and solutions to  
23 addressing tobacco dependence in addiction treatment programs. *Alcohol Res Health*.  
24 2006;29(3):228-35. Epub 2007/03/22.  
25 132. Frohlich KL, Mykhalovskiy E, Poland BD, Haines-Saah R, Johnson J. Creating the socially  
26 marginalised youth smoker: the role of tobacco control. *Sociol Health Illn*. 2012;34(7):978-93. Epub  
27 2012/03/06.  
28 133. Cosh S, Maksimovic L, Ettridge K, Copley D, Bowden JA. Aboriginal and Torres Strait Islander  
29 utilisation of the Quitline service for smoking cessation in South Australia. *Australian Journal of*  
30 *Primary Health*. 2013;19(2):113-8.  
31 134. Bramley D, Riddell T, Whittaker R, Corbett T, Lin RB, Wills M, et al. Smoking cessation using  
32 mobile phone text messaging is as effective in Maori as non-Maori. *N Z Med J*.  
33 2005;118(1216):U1494. Epub 2005/06/07.  
34 135. Daley CM, James AS, Barnoskie RS, Segraves M, Schupbach R, Choi WS. "Tobacco has a  
35 purpose, not just a past": Feasibility of developing a culturally appropriate smoking cessation  
36 program for a pan-tribal native population. *Med Anthropol Q*. 2006;20(4):421-40. Epub 2007/01/18.  
37 136. Richmond R, Indig D, Butler T, Wilhelm K, Archer V, Wodak A. A randomized controlled trial  
38 of a smoking cessation intervention conducted among prisoners. *Addiction*. 2013;108(5):966-74.  
39 Epub 2012/12/12.  
40 137. Richmond RL, Butler T, Belcher JM, Wodak A, Wilhelm KA, Baxter E. Promoting smoking  
41 cessation among prisoners: feasibility of a multi-component intervention. *Aust N Z J Public Health*.  
42 2006;30(5):474-8. Epub 2006/11/01.  
43 138. Siru R, Hulse GK, Tait RJ. Assessing motivation to quit smoking in people with mental illness:  
44 a review. *Addiction*. 2009;104(5):719-33. Epub 2009/05/06.  
45 139. Dani JA, Harris RA. Nicotine addiction and comorbidity with alcohol abuse and mental illness.  
46 *Nat Neurosci*. 2005;8(11):1465-70. Epub 2005/10/28.  
47 140. Lawn S, Hersh D, Ward PR, Tsourtos G, Muller R, Winefield A, et al. 'I just saw it as something  
48 that would pull you down, rather than lift you up': resilience in never-smokers with mental illness.  
49 *Health Educ Res*. 2011;26(1):26-38. Epub 2010/11/11.  
50 141. Ward PR, Muller R, Tsourtos G, Hersh D, Lawn S, Winefield AH, et al. Additive and  
51 subtractive resilience strategies as enablers of biographical reinvention: a qualitative study of ex-  
52 smokers and never-smokers. *Soc Sci Med*. 2011;72(7):1140-8. Epub 2011/03/08.  
53  
54  
55  
56  
57  
58  
59  
60

- 1  
2  
3 142. McGee R, Williams S, Nada-Raja S, Olsson CA. Tobacco Smoking in Adolescence Predicts  
4 Maladaptive Coping Styles in Adulthood. *Nicotine Tob Res.* 2013;15(12):1971-7.  
5 143. Gruskin EP, Greenwood GL, Matevia M, Pollack LM, Bye LL. Disparities in smoking between  
6 the lesbian, gay, and bisexual population and the general population in California. *Am J Public*  
7 *Health.* 2007;97(8):1496-502. Epub 2007/06/30.  
8 144. Weber MF, Banks E, Sitas F. Smoking in migrants in New South Wales, Australia: Report on  
9 data from over 100 000 participants in the 45 and Up Study. *Drug Alcohol Rev.* 2011;30(6):597-605.  
10 145. Substance Abuse and Mental Health Services Administration OoAS. Results from the 2007  
11 National Survey on Drug Use and Health: National Findings Rockville, MD.: 2008 Contract No.: DHHS  
12 Publication No. SMA 08-4343.  
13 146. Fazel S, Khosla V, Doll H, Geddes J. The prevalence of mental disorders among the homeless  
14 in western countries: systematic review and meta-regression analysis. *PLoS Med.* 2008;5(12):e225.  
15 Epub 2008/12/05.  
16 147. West R, McEwen A, Bolling K, Owen L. Smoking cessation and smoking patterns in the  
17 general population: a 1-year follow-up. *Addiction.* 2001;96(6):891-902. Epub 2001/06/12.  
18  
19  
20  
21  
22  
23  
24  
25  
26  
27  
28  
29  
30  
31  
32  
33  
34  
35  
36  
37  
38  
39  
40  
41  
42  
43  
44  
45  
46  
47  
48  
49  
50  
51  
52  
53  
54  
55  
56  
57  
58  
59  
60

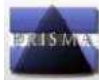

# PRISMA 2009 Checklist

| Section/topic                      | #  | Checklist item                                                                                                                                                                                                                                                                                              | Reported on page # |
|------------------------------------|----|-------------------------------------------------------------------------------------------------------------------------------------------------------------------------------------------------------------------------------------------------------------------------------------------------------------|--------------------|
| <b>TITLE</b>                       |    |                                                                                                                                                                                                                                                                                                             |                    |
| Title                              | 1  | Identify the report as a systematic review, meta-analysis, or both.                                                                                                                                                                                                                                         | 1                  |
| <b>ABSTRACT</b>                    |    |                                                                                                                                                                                                                                                                                                             |                    |
| Structured summary                 | 2  | Provide a structured summary including, as applicable: background; objectives; data sources; study eligibility criteria, participants, and interventions; study appraisal and synthesis methods; results; limitations; conclusions and implications of key findings; systematic review registration number. | 2                  |
| <b>INTRODUCTION</b>                |    |                                                                                                                                                                                                                                                                                                             |                    |
| Rationale                          | 3  | Describe the rationale for the review in the context of what is already known.                                                                                                                                                                                                                              | 3-4                |
| Objectives                         | 4  | Provide an explicit statement of questions being addressed with reference to participants, interventions, comparisons, outcomes, and study design (PICOS).                                                                                                                                                  | 3-5                |
| <b>METHODS</b>                     |    |                                                                                                                                                                                                                                                                                                             |                    |
| Protocol and registration          | 5  | Indicate if a review protocol exists, if and where it can be accessed (e.g., Web address), and, if available, provide registration information including registration number.                                                                                                                               | 5                  |
| Eligibility criteria               | 6  | Specify study characteristics (e.g., PICOS, length of follow-up) and report characteristics (e.g., years considered, language, publication status) used as criteria for eligibility, giving rationale.                                                                                                      | 6                  |
| Information sources                | 7  | Describe all information sources (e.g., databases with dates of coverage, contact with study authors to identify additional studies) in the search and date last searched.                                                                                                                                  | 5                  |
| Search                             | 8  | Present full electronic search strategy for at least one database, including any limits used, such that it could be repeated.                                                                                                                                                                               | See Table 1        |
| Study selection                    | 9  | State the process for selecting studies (i.e., screening, eligibility, included in systematic review, and, if applicable, included in the meta-analysis).                                                                                                                                                   | 6-7                |
| Data collection process            | 10 | Describe method of data extraction from reports (e.g., piloted forms, independently, in duplicate) and any processes for obtaining and confirming data from investigators.                                                                                                                                  | 7                  |
| Data items                         | 11 | List and define all variables for which data were sought (e.g., PICOS, funding sources) and any assumptions and simplifications made.                                                                                                                                                                       | 6 -8 (see Table 2) |
| Risk of bias in individual studies | 12 | Describe methods used for assessing risk of bias of individual studies (including specification of whether this was done at the study or outcome level), and how this information is to be used in any data synthesis.                                                                                      | 7                  |
| Summary measures                   | 13 | State the principal summary measures (e.g., risk ratio, difference in means).                                                                                                                                                                                                                               | 7                  |
| Synthesis of results               | 14 | Describe the methods of handling data and combining results of studies, if done, including measures of consistency (e.g., $I^2$ for each meta-analysis). <a href="http://bmjopen.bmj.com/site/about/guidelines.xhtml">http://bmjopen.bmj.com/site/about/guidelines.xhtml</a>                                | 7-8                |

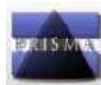

# PRISMA 2009 Checklist

Page 1 of 2

| Section/topic                 | #  | Checklist item                                                                                                                                                                                           | Reported on page #                                  |
|-------------------------------|----|----------------------------------------------------------------------------------------------------------------------------------------------------------------------------------------------------------|-----------------------------------------------------|
| Risk of bias across studies   | 15 | Specify any assessment of risk of bias that may affect the cumulative evidence (e.g., publication bias, selective reporting within studies).                                                             | 7                                                   |
| Additional analyses           | 16 | Describe methods of additional analyses (e.g., sensitivity or subgroup analyses, meta-regression), if done, indicating which were pre-specified.                                                         | NA                                                  |
| <b>RESULTS</b>                |    |                                                                                                                                                                                                          |                                                     |
| Study selection               | 17 | Give numbers of studies screened, assessed for eligibility, and included in the review, with reasons for exclusions at each stage, ideally with a flow diagram.                                          | 8 (See Figure 1)                                    |
| Study characteristics         | 18 | For each study, present characteristics for which data were extracted (e.g., study size, PICOS, follow-up period) and provide the citations.                                                             | See supplementary files 1, 2 and 3)                 |
| Risk of bias within studies   | 19 | Present data on risk of bias of each study and, if available, any outcome level assessment (see item 12).                                                                                                | 9 (See supplementary files 4 and 5)                 |
| Results of individual studies | 20 | For all outcomes considered (benefits or harms), present, for each study: (a) simple summary data for each intervention group (b) effect estimates and confidence intervals, ideally with a forest plot. | See supplementary files 1, 2 and 3)                 |
| Synthesis of results          | 21 | Present results of each meta-analysis done, including confidence intervals and measures of consistency.                                                                                                  | See supplementary files 7 and 8 and tables 3 and 4) |
| Risk of bias across studies   | 22 | Present results of any assessment of risk of bias across studies (see Item 15).                                                                                                                          | 9-10                                                |
| Additional analysis           | 23 | Give results of additional analyses, if done (e.g., sensitivity or subgroup analyses, meta-regression [see Item 16]).                                                                                    | NA                                                  |
| <b>DISCUSSION</b>             |    |                                                                                                                                                                                                          |                                                     |
| Summary of evidence           | 24 | Summarize the main findings including the strength of evidence for each main outcome; consider their relevance to key groups (e.g., healthcare providers, users, and policy makers).                     | 11-19                                               |



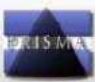

# PRISMA 2009 Checklist

1  
2  
3  
4  
5  
6  
7  
8  
9  
10  
11  
12  
13  
14  
15  
16  
17  
18  
19  
20  
21  
22  
23  
24  
25  
26  
27  
28  
29  
30  
31  
32  
33  
34  
35  
36  
37  
38  
39  
40  
41  
42  
43  
44  
45  
46  
47  
48  
49

|                |    |                                                                                                                                                               |       |
|----------------|----|---------------------------------------------------------------------------------------------------------------------------------------------------------------|-------|
| Limitations    | 25 | Discuss limitations at study and outcome level (e.g., risk of bias), and at review-level (e.g., incomplete retrieval of identified research, reporting bias). | 16-17 |
| Conclusions    | 26 | Provide a general interpretation of the results in the context of other evidence, and implications for future research.                                       | 11-19 |
| <b>FUNDING</b> |    |                                                                                                                                                               |       |
| Funding        | 27 | Describe sources of funding for the systematic review and other support (e.g., supply of data); role of funders for the systematic review.                    | 1     |

From: Moher D, Liberati A, Tetzlaff J, Altman DG, The PRISMA Group (2009). Preferred Reporting Items for Systematic Reviews and Meta-Analyses: The PRISMA Statement. PLoS Med 6(6): e1000097. doi:10.1371/journal.pmed1000097

For more information, visit: [www.prisma-statement.org](http://www.prisma-statement.org).

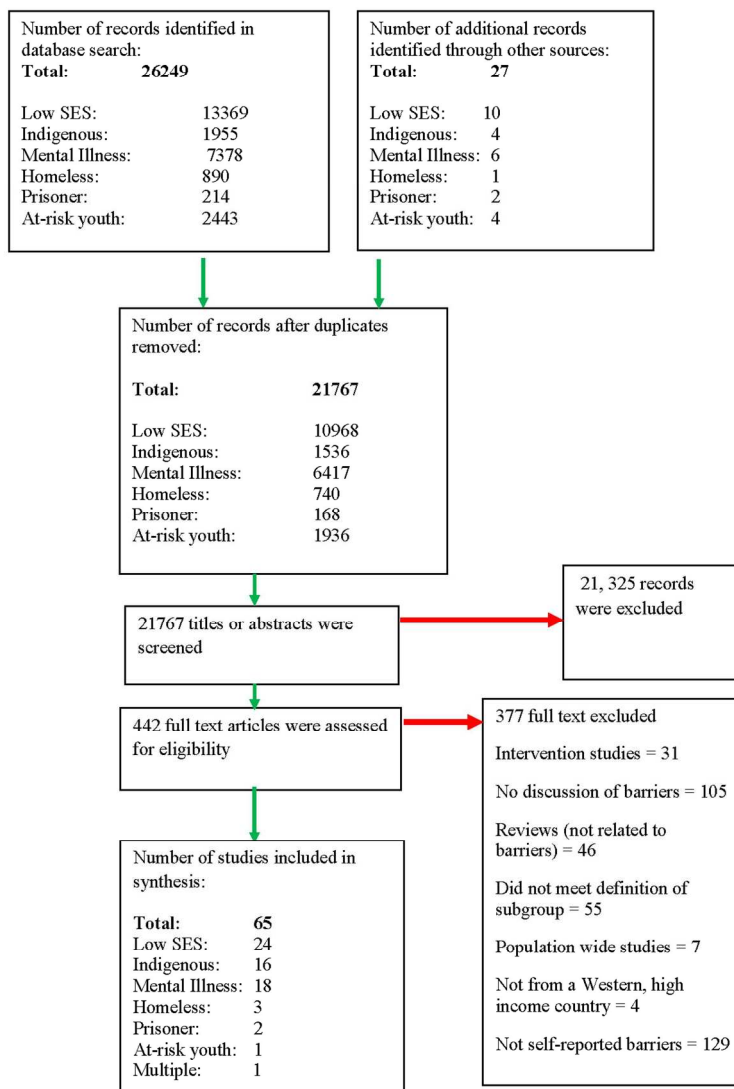

Figure 1. Database search results

190x254mm (300 x 300 DPI)

1  
2  
3  
4  
5  
6  
7  
8  
9  
10  
11  
12  
13  
14  
15  
16  
17  
18  
19  
20  
21  
22  
23  
24  
25  
26  
27  
28  
29  
30  
31  
32  
33  
34  
35  
36  
37  
38  
39  
40  
41  
42  
43  
44  
45  
46  
47  
48  
49  
50  
51  
52  
53  
54  
55  
56  
57  
58  
59  
60

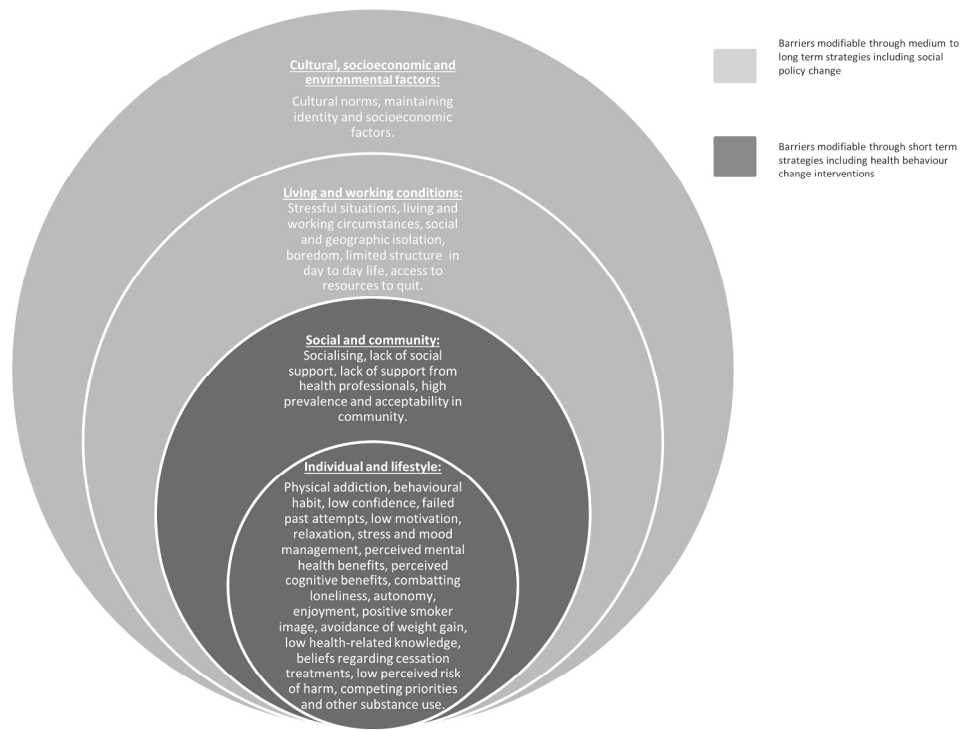

250x199mm (300 x 300 DPI)

ew only

1  
2  
3  
4  
5  
6  
7  
8  
9  
10  
11  
12  
13  
14  
15  
16  
17  
18  
19  
20  
21  
22  
23  
24  
25  
26  
27  
28  
29  
30  
31  
32  
33  
34  
35  
36  
37  
38  
39  
40  
41  
42  
43  
44  
45  
46  
47  
48  
49  
50  
51  
52  
53  
54  
55  
56  
57  
58  
59  
60

**Supplementary file 1: References of full text articles that were retrieved, reviewed and excluded for not meeting inclusion criteria. Articles could meet multiple criteria for exclusion (total n = 377).**

**Low socioeconomic status studies excluded (n = 111)**

*Intervention studies*

1. Maher JE, Rohde K, Dent CW, Stark MJ, Pizacani B, Boysun MJ, et al. Is a statewide tobacco quitline an appropriate service for specific populations? *Tobacco Control*. 2007;16 Suppl 1:i65-70.
2. Miller CL, Sedivy V. Using a quitline plus low-cost nicotine replacement therapy to help disadvantaged smokers to quit. *Tobacco Control*. 2009;18(2):144-9.
3. Moffatt J, Stanton WR. Smoking and parenting among males in low socio-economic occupations. *International Journal of Health Promotion and Education*. 2005;43(3):81-6.
4. O'Brien J, Salmon A, Geikie A, Jardine A, Oakes W. Integrating smoking care in community welfare agencies to reach disadvantaged people: Findings from the Smoking Matters Project. *Health Promotion Journal of Australia*. 2010;21(3):176-82.
5. O'Loughlin J, Paradis G, Renaud L, Meshefedjian G, Barnett T. The "Yes, I Quit" smoking cessation course: does it help women in a low income community quit? *Journal of community health*. 1997;22(6):451-68.
6. Sias JJ, Urquidi UJ, Bristow ZM, Rodriguez JC, Ortiz M. Evaluation of smoking cessation behaviors and interventions among Latino smokers at low-income clinics in a US-Mexico border county. *Addictive behaviors*. 2008;33(2):373-80. Epub 2007/11/17.

*No discussion of barriers*

1. Ackerson LK, Viswanath K. Communication inequalities, social determinants, and intermittent smoking in the 2003 Health Information National Trends Survey. *Preventing chronic disease*. 2009;6(2):A40.
2. Amos A, Wiltshire S, Bostock Y, Haw S, McNeill A. 'You can't go without a fag...you need it for your hash'--a qualitative exploration of smoking, cannabis and young people. *Addiction (Abingdon, England)*. 2004;99(1):77-81. Epub 2003/12/18.
3. Arnold CL, Davis TC, Berkel HJ, Jackson RH, Nandy I, London S. Smoking status, reading level, and knowledge of tobacco effects among low-income pregnant women. *Preventive medicine*. 2001;32(4):313-20. Epub 2001/04/17.
4. Bonevski B, Bryant J, Paul C. Encouraging smoking cessation among disadvantaged groups: a qualitative study of the financial aspects of cessation. *Drug and alcohol review*. 2011;30(4):411-8. Epub 2011/03/02.
5. Donaghy E, Bauld L, Eadie D, McKell J, Pringle B, Amos A. A qualitative study of how young Scottish smokers living in disadvantaged communities get their cigarettes. *Nicotine & tobacco research : official journal of the Society for Research on Nicotine and Tobacco*. 2013;15(12):2053-9. Epub 2013/08/06.
6. Eadie D, MacAskill S, McKell J, Baybutt M. Barriers and facilitators to a criminal justice tobacco control coordinator: an innovative approach to supporting smoking cessation among offenders. *Addiction (Abingdon, England)*. 2012;107 Suppl 2:26-38. Epub 2012/11/21.
7. Gillies V, Willig C. 'You get the nicotine and that in your blood'—constructions of addiction and control in women's accounts of cigarette smoking. *Journal of Community & Applied Social Psychology*. 1997;7(4):285-301.
8. Macleod J, Smith GD, Metcalfe C, Hart C. Is subjective social status a more important determinant of health than objective social status? Evidence from a prospective observational study of Scottish men. *Social Science & Medicine*. 2005;61(9):1916-29.
9. Manfredi C, Cho YI, Crittenden KS, Dolecek TA. A path model of smoking cessation in women smokers of low socio-economic status. *Health education research*. 2007;22(5):747-56.

10. Manfredi C, Lacey L, Warnecke R, Balch G. Method effects in survey and focus group findings: understanding smoking cessation in low-SES African American women. *Health education & behavior : the official publication of the Society for Public Health Education*. 1997;24(6):786-800. Epub 1997/12/31.
11. Moore RS, McLellan DL, Tauras JA, Fagan P. Securing the health of disadvantaged women: a critical investigation of tobacco-control policy effects on women worldwide. *American Journal of Preventive Medicine*. 2009;37(2 Suppl):S117-20.
12. Pickett KE, Luo Y, Lauderdale DS. Widening social inequalities in risk for sudden infant death syndrome. *American journal of public health*. 2005;95(11):1976-81.
13. Pollak KI, Arredondo EM, Yarnall KSH, Lipkus I, Myers E, McNeilly M, et al. Influence of stereotyping in smoking cessation counselling by primary care residents. *Ethnicity and Disease*. 2002;12(4):578-84.
14. Wilson IS, Ritchie D, Amos A, Shaw A, O'Donnell R, Mills LM, et al. 'I'm not doing this for me': mothers' accounts of creating smoke-free homes. *Health Educ Res*. 2013;28(1):165-78. Epub 2012/07/31.
15. Wiltshire S, Bancroft A, Amos A, Parry O. "They're doing people a service"-qualitative study of smoking, smuggling, and social deprivation. *BMJ (Clinical research ed)*. 2001;323(7306):203-7. Epub 2001/07/28.

*No discussion of barriers to smoking cessation (e.g. might be barriers to accessing health care in general)*

1. Ackerson LK, Viswanath K. Communication inequalities, social determinants, and intermittent smoking in the 2003 Health Information National Trends Survey. *Preventing chronic disease*. 2009;6(2):A40.
2. Amos A, Wiltshire S, Bostock Y, Haw S, McNeill A. 'You can't go without a fag...you need it for your hash'--a qualitative exploration of smoking, cannabis and young people. *Addiction (Abingdon, England)*. 2004;99(1):77-81. Epub 2003/12/18.
3. Arnold CL, Davis TC, Berkel HJ, Jackson RH, Nandy I, London S. Smoking status, reading level, and knowledge of tobacco effects among low-income pregnant women. *Preventive medicine*. 2001;32(4):313-20. Epub 2001/04/17.
4. Bonevski B, Bryant J, Paul C. Encouraging smoking cessation among disadvantaged groups: a qualitative study of the financial aspects of cessation. *Drug and alcohol review*. 2011;30(4):411-8. Epub 2011/03/02.
5. Donaghy E, Bauld L, Eadie D, McKell J, Pringle B, Amos A. A qualitative study of how young Scottish smokers living in disadvantaged communities get their cigarettes. *Nicotine & tobacco research : official journal of the Society for Research on Nicotine and Tobacco*. 2013;15(12):2053-9. Epub 2013/08/06.
6. Eadie D, MacAskill S, McKell J, Baybutt M. Barriers and facilitators to a criminal justice tobacco control coordinator: an innovative approach to supporting smoking cessation among offenders. *Addiction (Abingdon, England)*. 2012;107 Suppl 2:26-38. Epub 2012/11/21.
7. Gillies V, Willig C. 'You get the nicotine and that in your blood'—constructions of addiction and control in women's accounts of cigarette smoking. *Journal of Community & Applied Social Psychology*. 1997;7(4):285-301.
8. Macleod J, Smith GD, Metcalfe C, Hart C. Is subjective social status a more important determinant of health than objective social status? Evidence from a prospective observational study of Scottish men. *Social Science & Medicine*. 2005;61(9):1916-29.
9. Manfredi C, Cho YI, Crittenden KS, Dolecek TA. A path model of smoking cessation in women smokers of low socio-economic status. *Health education research*. 2007;22(5):747-56.
10. Manfredi C, Lacey L, Warnecke R, Balch G. Method effects in survey and focus group findings: understanding smoking cessation in low-SES African American women. *Health education &*

behavior : the official publication of the Society for Public Health Education. 1997;24(6):786-800. Epub 1997/12/31.

11. Moore RS, McLellan DL, Tauras JA, Fagan P. Securing the health of disadvantaged women: a critical investigation of tobacco-control policy effects on women worldwide. *American Journal of Preventive Medicine*. 2009;37(2 Suppl):S117-20.
12. Pickett KE, Luo Y, Lauderdale DS. Widening social inequalities in risk for sudden infant death syndrome. *American journal of public health*. 2005;95(11):1976-81.
13. Pollak KI, Arredondo EM, Yarnall KSH, Lipkus I, Myers E, McNeilly M, et al. Influence of stereotyping in smoking cessation counselling by primary care residents. *Ethnicity and Disease*. 2002;12(4):578-84.
14. Wilson IS, Ritchie D, Amos A, Shaw A, O'Donnell R, Mills LM, et al. 'I'm not doing this for me': mothers' accounts of creating smoke-free homes. *Health Educ Res*. 2013;28(1):165-78. Epub 2012/07/31.
15. Wiltshire S, Bancroft A, Amos A, Parry O. "They're doing people a service"-qualitative study of smoking, smuggling, and social deprivation. *BMJ (Clinical research ed)*. 2001;323(7306):203-7. Epub 2001/07/28.
16. Copeland AL, Businelle MS, Stewart DW, Patterson SM, Rash CJ, Carney CE. Identifying Barriers to Entering Smoking Cessation Treatment Among Socioeconomically Disadvantaged Smokers. *Journal of Smoking Cessation*. 2010;5(02):164-71.
17. Jones LL, Atkinson O, Longman J, Coleman T, McNeill A, Lewis SA. The motivators and barriers to a smoke-free home among disadvantaged caregivers: identifying the positive levers for change. *Nicotine & tobacco research : official journal of the Society for Research on Nicotine and Tobacco*. 2011;13(6):479-86. Epub 2011/03/31.
18. Katainen A. Smoking and workers' autonomy: a qualitative study on smoking practices in manual work. *Health (London, England : 1997)*. 2012;16(2):134-50. Epub 2011/04/14.
19. Sheffer CE, Brackman SL, Cottoms N, Olsen M. Understanding the barriers to use of free, proactive telephone counseling for tobacco dependence. *Qualitative health research*. 2011;21(8):1075-85. Epub 2011/04/06.

*Not carried out in high income country/not published in English*

1. Ossip-Klein DJ, Fisher S, Diaz S, Quiñones Z, Sierra E, Dozier A, et al. Tobacco use in six economically disadvantaged communities in the Dominican Republic. *Nicotine & Tobacco Research*. 2008;10(5):851-60.

*Not reporting the perceived self-reported barriers to smoking cessation (e.g. might report results of logistic regressions showing nicotine dependence associated with cessation success)*

1. Bhandari S, Levitch AH, Ellis KK, Ball K, Everett K, Geden E, et al. Comparative analyses of stressors experienced by rural low-income pregnant women experiencing intimate partner violence and those who are not. *Journal of obstetric, gynecologic, and neonatal nursing : JOGNN / NAACOG*. 2008;37(4):492-501. Epub 2008/08/30.
2. Caleyachetty A, Lewis S, McNeill A, Leonardi-Bee J. Struggling to make ends meet: exploring pathways to understand why smokers in financial difficulties are less likely to quit successfully. *European journal of public health*. 2012;22 Suppl 1:41-8.
3. Colgan Y, Turnbull DA, Mikocka-Walus AA, Delfabbro P. Determinants of resilience to cigarette smoking among young Australians at risk: An exploratory study. *Tobacco Induced Diseases*. 2010;8(1).
4. Collins BN, Nair U, Hovell MF, Audrain-McGovern J. Smoking-related weight concerns among underserved, black maternal smokers. *American journal of health behavior*. 2009;33(6):699-709. Epub 2009/03/27.

- 1
  - 2
  - 3
  - 4
  - 5
  - 6
  - 7
  - 8
  - 9
  - 10
  - 11
  - 12
  - 13
  - 14
  - 15
  - 16
  - 17
  - 18
  - 19
  - 20
  - 21
  - 22
  - 23
  - 24
  - 25
  - 26
  - 27
  - 28
  - 29
  - 30
  - 31
  - 32
  - 33
  - 34
  - 35
  - 36
  - 37
  - 38
  - 39
  - 40
  - 41
  - 42
  - 43
  - 44
  - 45
  - 46
  - 47
  - 48
  - 49
  - 50
  - 51
  - 52
  - 53
  - 54
  - 55
  - 56
  - 57
  - 58
  - 59
  - 60
5. Cummings KM, Hyland A, Giovino GA, Hastrup JL, Bauer JE, Bansal MA. Are smokers adequately informed about the health risks of smoking and medicinal nicotine? *Nicotine & Tobacco Research*. 2004;6 Suppl 3:S333-40.
6. de Beyer J, Lovelace C, Yürekli A. Poverty and tobacco. *Tobacco Control*. 2001;10(3):210-1.
7. De Silva V, Samarasinghe D, Hanwella R. Association between concurrent alcohol and tobacco use and poverty. *Drug & Alcohol Review*. 2011;30(1):69-73.
8. Graham H. Women and smoking: Understanding socioeconomic influences. *Drug and Alcohol Dependence*. 2009;104(Suppl1):S11-S6.
9. Graham H, Der G. Influences on women's smoking status: the contribution of socioeconomic status in adolescence and adulthood. *European journal of public health*. 1999;9(2):137-41.
10. Graham H, Der G. Patterns and predictors of smoking cessation among British women. *Health promotion international*. 1999;14(3):231-9.
11. Graham H, Der G. Patterns and predictors of tobacco consumption among women. *Health education research*. 1999;14(5):611-8.
12. Graham H, Francis B, Inskip HM, Harman J, Team SWSS. Socioeconomic lifecourse influences on women's smoking status in early adulthood. *Journal of Epidemiology & Community Health*. 2006;60(3):228-33.
13. Graham H, Hawkins SS, Law C. Lifecourse influences on women's smoking before, during and after pregnancy. *Social Science & Medicine*. 2010;70(4):582-7.
14. Graham H, Inskip HM, Francis B, Harman J. Pathways of disadvantage and smoking careers: Evidence and policy implications. *Journal of epidemiology and community health*. 2006;60(Suppl 2):7-12.
15. Graham H, Owen L. Are there socioeconomic differentials in under-reporting of smoking in pregnancy? *Tobacco Control*. 2003;12(4):434.
16. Harwood GA, Salsberry P, Ferketich AK, Wewers ME. Cigarette smoking, socioeconomic status, and psychosocial factors: examining a conceptual framework. *Public health nursing (Boston, Mass)*. 2007;24(4):361-71. Epub 2007/06/08.
17. Heulton C, Nelson K. Going public. Reversal of misfortune: viewing tobacco as a social justice issue. *American journal of public health*. 2004;94(2):186-91.
18. Kim DH, Daskalakis C, Plumb JD, Adams S, Brawer R, Orr N, et al. Modifiable cardiovascular risk factors among individuals in low socioeconomic communities and homeless shelters. *Family & community health*. 2008;31(4):269-80.
19. Kleinjan M, van den Eijnden RJM, Engels RCME. Adolescents' rationalizations to continue smoking: the role of disengagement beliefs and nicotine dependence in smoking cessation. *Addictive behaviors*. 2009;34(5):440-5.
20. Lacey LP, Manfredi C, Balch G, Warnecke RB, Allen K, Edwards C. Social support in smoking cessation among black women in Chicago public housing. *Public Health Reports*. 1993;108(3):387-94.
21. Lennox AS. Determinants of outcome in smoking cessation. *British Journal of General Practice*. 1992;42(359):247-52.
22. Lindström M. Social capital, social class and tobacco smoking. *Expert Review of Pharmacoeconomics & Outcomes Research*. 2008;8(1):81-9.
23. Manfredi C, Lacey L, Warnecke R, Buis M. Smoking-related behavior, beliefs, and social environment of young black women in subsidized public housing in Chicago. *American journal of public health*. 1992;82(2):267-72. Epub 1992/02/01.
24. Morrow M, Barraclough S. Gender equity and tobacco control: bringing masculinity into focus. *Global health promotion*. 2010;17(1 Suppl):21-8.
25. O'Loughlin J, Paradis G, Renaud L, Sanchez Gomez L. One-year predictors of smoking initiation and of continued smoking among elementary schoolchildren in multiethnic, low-income, inner-city neighbourhoods. *Tobacco Control*. 1998;7(3):268-75.

26. Ostroff JS, Shuk E, Krebs P, Lu W-H, Burkhalter J, Cortez-Weir J, et al. Qualitative evaluation of a new tobacco cessation training curriculum for patient navigators. *Journal of Cancer Education*. 2011;26(3):427-35.
27. Pickett K, Wilkinson R, Wakschlag L. The psychosocial context of pregnancy smoking and quitting in the Millennium Cohort Study. *Journal of epidemiology and community health*. 2009;63(6):474-80.
28. Pickett KE, Wakschlag LS, Rathouz PJ, Leventhal BL, Abrams B. The working-class context of pregnancy smoking. *Health & place*. 2002;8(3):167-75.
29. Reitzel LR, Vidrine JI, Li Y, Mullen PD, Velasquez MM, Cinciripini PM, et al. The influence of subjective social status on vulnerability to postpartum smoking among young pregnant women. *American journal of public health*. 2007;97(8):1476-82.
30. Roberts-Clarke I, Morokoff P, Bane C, Ruggiero L. Characteristics of Smoking in Low-Income Pregnant Latina and White Women. *Journal of Community Health Nursing*. 2002;19(2):77-81.
31. Rooke C, Amos A, Hight G, Hargreaves K. Smoking spaces and practices in pubs, bars and clubs: young adults and the English smokefree legislation. *Health Place*. 2013;19:108-15. Epub 2012/12/12.
32. Ryckman KA, Bercaw DM, Ellis MR, Wolf DG. What predicts a successful smoking cessation attempt? *The Journal of family practice*. 2006;55(9):No Pagination Specified.
33. Sheahan SL, Free TA, Rayens MK. Smoking behavior and desire to quit among low-income female caregivers. *Applied nursing research : ANR*. 2003;16(3):156-63. Epub 2003/08/22.
34. Siahpush M, Borland R, Scollo M. Prevalence and socio-economic correlates of smoking among lone mothers in Australia. *Australian & New Zealand Journal of Public Health*. 2002;26(2):132-5.
35. Siahpush M, Borland R, Scollo M. Smoking and financial stress. *Tobacco Control*. 2003;12(1):60-6.
36. Siahpush M, Borland R, Yong HH. Sociodemographic and psychosocial correlates of smoking-induced deprivation and its effect on quitting: findings from the International Tobacco Control Policy Evaluation Survey. *Tobacco Control*. 2007;16(2):e2-e.
37. Siegel D, Faigeles B. Smoking and socioeconomic status in a population-based inner city sample of African-Americans, Latinos and whites. *Journal of Cardiovascular Risk*. 1996;3(3):295-300.
38. Snell C, Bailey L. Operation storefront: observations of tobacco retailer advertising and compliance with tobacco laws. *Youth Violence & Juvenile Justice*. 2005;3(1):78-90.
39. Solberg LI, Parker ED, Foldes SS, Walker PF. Disparities in tobacco cessation medication orders and fills among special populations. *Nicotine & Tobacco Research*. 2010;12(2):144-51.

#### *Population level study*

1. Adams RJ, Howard N, Tucker G, Appleton S, Taylor AW, Chittleborough C, et al. Effects of area deprivation on health risks and outcomes: A multilevel, cross-sectional, Australian population study. *International journal of public health*. 2009;54(3):183-92.
2. Graham H, Hunt S. Women's smoking and measures of women's socioeconomic status in the United Kingdom. *Health promotion international*. 1994;9(2):81-8.
3. Hiscock R, Bauld L, Amos A, Platt S. Smoking and socioeconomic status in England: the rise of the never smoker and the disadvantaged smoker. *Journal of public health (Oxford, England)*. 2012;34(3):390-6. Epub 2012/03/01.
4. Leung J, Gartner C, Dobson A, Lucke J, Hall W. Psychological distress is associated with tobacco smoking and quitting behaviour in the Australian population: Evidence from national cross-sectional surveys. *Australian and New Zealand Journal of Psychiatry*. 2011;45(2):170-8.
5. Smith GD, Hart C. "Socioeconomic factors, health behaviors, and mortality: Results from a nationally representative prospective study of US adults": Comment. *JAMA: Journal of the American Medical Association*. 1998;280(20):1744-5.



*Reviews (reviews conducted on smoking within the defined disadvantaged group but not reporting on perceived barriers to smoking cessation)*

1. Doolan DM, Froelicher ES. Efficacy of smoking cessation intervention among special populations: review of the literature from 2000 to 2005. *Nursing research*. 2006;55(4S):S29-37.
2. Frazier LM, Molgaard CA, Fredrickson DD, Early JL, Schukman JS, Dismuke SE. Barriers to smoking cessation initiatives for Medicaid clients in managed care. *Substance use & misuse*. 2001;36(13):1875-99. Epub 2002/01/25.
3. Geckova A, van Dijk JP, van Ittersum-Gritter T, Groothoff JW, Post D. Determinants of adolescents' smoking behaviour: a literature review. *Central European Journal of Public Health*. 2002;10(3):79-87.
4. Greaves L, Jategaonkar N. Tobacco policies and vulnerable girls and women: toward a framework for gender sensitive policy development. *Journal of epidemiology and community health*. 2006;60 Suppl 2:57-65. Epub 2007/08/22.
5. Kim SS, Ziedonis D, Chen K. Tobacco use and dependence in Asian American and Pacific Islander adolescents: a review of the literature. *Journal of Ethnicity in Substance Abuse*. 2007;6(3-4):113-42.
6. Lodge N. The identified needs of ethnic minority groups with cancer within the community: a review of the literature. *European Journal of Cancer Care*. 2001;10(4):234-44.
7. Power J, Grealay C, Rintoul D. Tobacco interventions for Indigenous Australians: a review of current evidence. *Health Promotion Journal of Australia*. 2009;20(3):186-94.
8. Schneider S, Schutz J. Who smokes during pregnancy? A systematic literature review of population-based surveys conducted in developed countries between 1997 and 2006. *The European Journal of Contraception and Reproductive Health Care*. 2008;13(2):138-47.
9. Seo D-C, Huang Y. Systematic review of social network analysis in adolescent cigarette smoking behavior. *Journal of School Health*. 2012;82(1):21-7.

*Studies not meeting the subgroup definition*

1. Abdullah ASM, Ho LM, Kwan YH, Cheung WL, McGhee SM, Chan WH. Promoting smoking cessation among the elderly: What are the predictors of intention to quit and successful quitting? *Journal of aging and health* 2006;18(4):552-64
2. Adams E, Melvin CL, Raskind-Hood CL. Sociodemographic, insurance, and risk profiles of maternal smokers post the 1990s: How can we reach them? *Nicotine & Tobacco Research* 2008;10(7):1121-29
3. Aitken PP, Davies JK, Leathar DS. Smoking prevalence and beliefs among adult Scots: implications for health education. *International journal of health education* 1982;24(3):164-75
4. Blackburn C, Bonas S, Spencer N, Dolan A, Coe C, Moy R. Smoking behaviour change among fathers of new infants. *Social Science & Medicine* 2005;61(3):517-26
5. Denham SA, Meyer MG, Toborg MA. Tobacco cessation in adolescent females in Appalachian communities. *Family & community health* 2004;27(2):170-81
6. Ko M, Schulken ED. Factors related to smoking cessation and relapse among pregnant smokers. *American journal of health behavior* 1998;22(2):83-89
7. Kruger TM, Howell BM, Haney A, Davis RE, Fields N, Schoenberg NE. Perceptions of smoking cessation programs in rural Appalachia. *American journal of health behavior* 2012;36(3):373-84 doi: 10.5993/ajhb.36.3.8[published Online First: Epub Date] |.
8. Lawn S, Hersh D, Ward PR, et al. 'I just saw it as something that would pull you down, rather than lift you up!': resilience in never-smokers with mental illness. *Health Educ Res* 2011;26(1):26-38 doi: 10.1093/her/cyq065[published Online First: Epub Date] |.
9. Macnee CL, Talsma A. Development and testing of the barriers to cessation scale. *Nursing research* 1995;44(4):214-9

10. Northridge ME, Vallone D, Xiao H, et al. The importance of location for tobacco cessation: rural-urban disparities in quit success in underserved West Virginia counties. *Journal of Rural Health* 2008;**24**(2):106-15
11. Owers RC, Ballard KD. "What else is there to do?"--A qualitative study of the barriers to soldiers stopping smoking. *Journal of the Royal Army Medical Corps* 2008;**154**(3):152-5
12. Payne S. 'Smoke like a man, die like a man?': A review of the relationship between gender, sex and lung cancer. *Social Science and Medicine* 2001;**53**(8):1067-80
13. Pletsch PK, Morgan S, Pieper AF. Context and beliefs about smoking and smoking cessation. *MCN. The American journal of maternal child nursing* 2003;**28**(5):320-5
14. Ripley-Moffitt CE, Goldstein AO, Fang WL, Butzen AY, Walker S, Lohr JA. Safe babies: a qualitative analysis of the determinants of postpartum smoke-free and relapse states. *Nicotine & tobacco research : official journal of the Society for Research on Nicotine and Tobacco* 2008;**10**(8):1355-64 doi: 10.1080/14622200802238936[published Online First: Epub Date] |.
15. Shervington DO. Attitudes and practices of African-American women regarding cigarette smoking: implications for interventions. *Journal of the National Medical Association* 1994;**86**(5):337-43
16. Ward PR, Muller R, Tsourtos G, et al. Additive and subtractive resilience strategies as enablers of biographical reinvention: a qualitative study of ex-smokers and never-smokers. *Social science & medicine (1982)* 2011;**72**(7):1140-8 doi: 10.1016/j.socscimed.2011.01.023[published Online First: Epub Date] |.
17. Wewers ME, Ahijevych KL, Chen MS, Dresbach S, Kihm KE, Kuun PA. Tobacco use characteristics among rural Ohio Appalachians. *Journal of community health* 2000;**25**(5):377-88

### **Indigenous studies (n = 68)**

#### *Intervention studies*

1. Choi WS, Faseru B, Beebe LA, Greiner AK, Yeh HW, Shireman TI, et al. Culturally-tailored smoking cessation for American Indians: study protocol for a randomized controlled trial. *Trials* 2011;**12**:126. Epub 2011/05/20.
2. Daley CM, James AS, Barnoskie RS, Segraves M, Schupbach R, Choi WS. "Tobacco has a purpose, not just a past": Feasibility of developing a culturally appropriate smoking cessation program for a pan-tribal native population. *Medical anthropology quarterly*. 2006;**20**(4):421-40. Epub 2007/01/18.
3. Glover M, Bosman A, Wagemakers A, Kira A, Paton C, Cowie N. An innovative team-based stop smoking competition among Maori and Pacific Island smokers: rationale and method for the study and its evaluation. *BMC public health*. 2013;**13**:1228. Epub 2013/12/25.
4. Harvey D, Tsey K, Cadet-James Y, Minniecon D, Ivers R, McCalman J, et al. An evaluation of tobacco brief intervention training in three indigenous health care settings in north Queensland. *Australian and New Zealand journal of public health*. 2002;**26**(5):426-31. Epub 2002/11/05.
5. Ivers RG, Farrington M, Burns CB, Bailie RS, D'Abbs PH, Richmond RL, et al. A study of the use of free nicotine patches by Indigenous people. *Australian and New Zealand journal of public health*. 2003;**27**(5):486-90. Epub 2003/12/04.
6. Johnston V, Walker N, Thomas DP, Glover M, Chang AB, Bullen C, et al. The study protocol for a randomized controlled trial of a family-centred tobacco control program about environmental tobacco smoke (ETS) to reduce respiratory illness in Indigenous infants. *BMC public health*. 2010;**10**:114. Epub 2010/03/09.
7. Makosky Daley C, Cowan P, Nollen NL, Greiner KA, Choi WS. Assessing the scientific accuracy, readability, and cultural appropriateness of a culturally targeted smoking cessation program for American Indians. *Health promotion practice*. 2009;**10**(3):386-93. Epub 2008/03/08.
8. Patten CA, Windsor RA, Renner CC, Enoch C, Hochreiter A, Nevak C, et al. Feasibility of a tobacco cessation intervention for pregnant Alaska Native women. *Nicotine & tobacco research :*

1  
2  
3 official journal of the Society for Research on Nicotine and Tobacco. 2010;12(2):79-87. Epub  
4 2009/12/19.  
5  
6

7  
8 *No discussion of barriers*  
9

- 10 1. Dennis MK, Momper SL. "It's bad around here now": tobacco, alcohol and other drug use  
11 among American Indians living on a rural reservation. Journal of ethnicity in substance abuse.  
12 2012;11(2):130-48. Epub 2012/06/12.
- 13 2. DiGiacomo M, Davidson PM, Davison J, Moore L, Abbott P. Stressful life events, resources,  
14 and access: key considerations in quitting smoking at an Aboriginal Medical Service. Australian and  
15 New Zealand journal of public health. 2007;31(2):174-6. Epub 2007/04/28.
- 16 3. Forster JL, Brokenleg I, Rhodes KL, Lamont GR, Poupart J. Cigarette smoking among  
17 American Indian youth in Minneapolis-St. Paul. American journal of preventive medicine. 2008;35(6  
18 Suppl):S449-56. Epub 2008/11/26.
- 19 4. Forster JL, Rhodes KL, Poupart J, Baker LO, Davey C, American Indian Community Tobacco  
20 Project Steering C. Patterns of tobacco use in a sample of American Indians in Minneapolis-St. Paul.  
21 Nicotine & tobacco research : official journal of the Society for Research on Nicotine and Tobacco.  
22 2007;9 Suppl 1:S29-37. Epub 2007/03/17.
- 23 5. Horn K, Noerachmanto N, Dino G, Manzo K, Brayboy M. Who wants to quit? Characteristics  
24 of American Indian youth who seek smoking cessation intervention. Journal of community health.  
25 2009;34(2):153-63.
- 26 6. Thomas DP, Johnston V, Fitz JW, McDonnell J. Monitoring local trends in Indigenous tobacco  
27 consumption. Australian and New Zealand journal of public health. 2009;33(1):64-6. Epub  
28 2009/02/25.

29  
30  
31  
32  
33 *No discussion of barriers to smoking cessation (e.g. might be barriers to accessing health care in*  
34 *general)*  
35

- 36 1. Beals J, Novins DK, Spicer P, Whitesell NR, Mitchell CM, Manson SM, et al. Help seeking for  
37 substance use problems in two American Indian reservation populations. Psychiatric services  
38 (Washington, DC). 2006;57(4):512-20. Epub 2006/04/11.
- 39 2. Berg CJ, Daley CM, Nazir N, Cully A, Pacheco CM, Buchanan T, et al. Smoke-Free Policies in  
40 the Workplace and in the Home among American Indians. Journal of health disparities research and  
41 practice. 2012;5(2):81-91. Epub 2012/01/01.
- 42 3. Bottorff JL, Carey J, Mowatt R, Varcoe C, Johnson JL, Hutchinson P, et al. Bingo halls and  
43 smoking: perspectives of First Nations women. Health & place. 2009;15(4):1014-21. Epub  
44 2009/06/02.
- 45 4. Bottorff JL, Johnson JL, Carey J, Hutchinson P, Sullivan D, Mowatt R, et al. A family affair:  
46 Aboriginal women's efforts to limit second-hand smoke exposure at home. Canadian journal of  
47 public health = Revue canadienne de sante publique. 2010;101(1):32-5. Epub 2010/04/07.
- 48 5. Filippi MK, McCloskey C, Williams C, Bull JW, Choi WS, Greiner KA, et al. Perceptions,  
49 barriers, and suggestions for creation of a tobacco and health website among American  
50 Indian/Alaska Native college students. Journal of community health. 2013;38(3):486-91. Epub  
51 2012/11/15.
- 52 6. Glover M, Fraser T, Nosa V. Views of Low Socio-Economic Smokers: What Will Help Them to  
53 Quit? Journal of Smoking Cessation. 2012;7(01):41-6.
- 54 7. Hemsing N, Greaves L, Poole N, Bottorff J. Reshuffling and relocating: the gendered and  
55 income-related differential effects of restricting smoking locations. Journal of environmental and  
56 public health. 2012;2012:907832. Epub 2012/05/24.
- 57 8. Johnston V, Westphal DW, Earnshaw C, Thomas DP. Starting to smoke: a qualitative study of  
58 the experiences of Australian indigenous youth. BMC public health. 2012;12:963. Epub 2012/11/13.  
59  
60

9. Klemp P, Robertson MC, Stansfield S, Klemp JA, Harding E. Factors associated with smoking and the reasons for stopping in Maori and Europeans: a comparative study. *The New Zealand medical journal*. 1998;111(1064):148-501. Epub 1998/06/05.
10. Leavy J, Wood L, Phillips F, Rosenberg M. Try and try again--qualitative insights into adolescent smoking experimentation and notions of addiction. *Health promotion journal of Australia : official journal of Australian Association of Health Promotion Professionals*. 2010;21(3):208-14. Epub 2010/12/02.
11. LeMaster PL, Connell CM, Mitchell CM, Manson SM. Tobacco use among American Indian adolescents: protective and risk factors. *The Journal of adolescent health : official publication of the Society for Adolescent Medicine*. 2002;30(6):426-32. Epub 2002/06/01.
12. Mitschke DB, Matsunaga DS, Loebl K, Tatafu E, Jr., Robinett H. Multi-ethnic adolescents' attitudes toward smoking: a focus group analysis. *American Journal of Health Promotion*. 2008;22(6):393-9.
13. Nadeau M, Blake N, Poupart J, Rhodes K, Forster JL. Circles of Tobacco Wisdom: learning about traditional and commercial tobacco with Native elders. *American journal of preventive medicine*. 2012;43(5 Suppl 3):S222-8. Epub 2012/10/25.
14. Nez Henderson P, Kanekar S, Wen Y, Buchwald D, Goldberg J, Choi W, et al. Patterns of cigarette smoking initiation in two culturally distinct American Indian tribes. *American journal of public health*. 2009;99(11):2020-5. Epub 2009/10/13.
15. Struthers R, Hodge FS. Sacred tobacco use in Ojibwe communities. *Journal of holistic nursing : official journal of the American Holistic Nurses' Association*. 2004;22(3):209-25. Epub 2004/08/07.
16. Thomas DP, Briggs V, Anderson IP, Cunningham J. The social determinants of being an Indigenous non-smoker. *Australian and New Zealand journal of public health*. 2008;32(2):110-6. Epub 2008/04/17.
17. Thomas DP, Ferguson M, Johnston V, Brimblecombe J. Impact and perceptions of tobacco tax increase in remote Australian aboriginal communities. *Nicotine & tobacco research : official journal of the Society for Research on Nicotine and Tobacco*. 2013;15(6):1099-106. Epub 2012/11/21.
18. Unger JB, Rohrbach LA, Cruz TB, Baezconde-Garbanati L, Howard KA, Palmer PH, et al. Ethnic variation in peer influences on adolescent smoking. *Nicotine & tobacco research : official journal of the Society for Research on Nicotine and Tobacco*. 2001;3(2):167-76. Epub 2001/06/14.
19. Unger JB, Shakib S, Cruz TB, Hoffman BR, Pitney BH, Rohrbach LA. Smoking behavior among urban and rural Native American adolescents in California. *American journal of preventive medicine*. 2003;25(3):251-4. Epub 2003/09/26.
20. Unger JB, Soto C, Baezconde-Garbanati L. Perceptions of ceremonial and nonceremonial uses of tobacco by American-Indian adolescents in California. *The Journal of adolescent health : official publication of the Society for Adolescent Medicine*. 2006;38(4):443 e9-16. Epub 2006/03/22.
21. van Esdonk T, Glover M, Kira A, Wagemakers A. Reducing Smoking in Pregnancy Among Maori Women: "Aunties" Perceptions and Willingness to Help. *Maternal and child health journal*. 2013. Epub 2013/11/12.

*Not reporting the perceived self-reported barriers to smoking cessation (e.g. might report results of logistic regressions showing nicotine dependence associated with cessation success)*

1. Baezconde-Garbanati L, Beebe LA, Perez-Stable EJ. Building capacity to address tobacco-related disparities among American Indian and Hispanic/Latino communities: conceptual and systemic considerations. *Addiction (Abingdon, England)*. 2007;102 Suppl 2:112-22. Epub 2007/10/06.
2. Beebe LA, Vesely SK, Oman RF, Tolma E, Aspy CB, Rodine S. Protective assets for non-use of alcohol, tobacco and other drugs among urban American Indian youth in Oklahoma. *Maternal & Child Health Journal*. 2008;12:S82-90.

3. Butler S, Williams M, Paterson J, Tukuitonga C. Smoking among mothers of a Pacific Island birth cohort in New Zealand: associated factors. *The New Zealand medical journal*. 2004;117(1206):U1171.
4. Cosh S, Maksimovic L, Ettridge K, Copley D, Bowden JA. Aboriginal and Torres Strait Islander utilisation of the Quitline service for smoking cessation in South Australia. *Australian journal of primary health*. 2013;19(2):113-8. Epub 2012/09/07.
5. Daley CM, Faseru B, Nazir N, Solomon C, Greiner KA, Ahluwalia JS, et al. Influence of traditional tobacco use on smoking cessation among American Indians. *Addiction (Abingdon, England)*. 2011;106(5):1003-9. Epub 2011/02/11.
6. Daley CM, Greiner KA, Nazir N, Daley SM, Solomon CL, Braiuca SL, et al. All Nations Breath of Life: using community-based participatory research to address health disparities in cigarette smoking among American Indians. *Ethnicity & disease*. 2010;20(4):334-8. Epub 2011/02/11.
7. Faseru B, Daley CM, Gajewski B, Pacheco CM, Choi WS. A longitudinal study of tobacco use among American Indian and Alaska Native tribal college students. *BMC public health*. 2010;10:617. Epub 2010/10/20.
8. Gilligan C, Sanson-Fisher RW, D'Este C, Eades S, Wenitong M. Knowledge and attitudes regarding smoking during pregnancy among Aboriginal and Torres Strait Islander women. *The Medical journal of Australia*. 2009;190(10):557-61.
9. Gould GS, McEwen A, Munn J. Jumping the hurdles for smoking cessation in pregnant Aboriginal and Torres Strait Islander women in Australia. *Journal of Smoking Cessation*. 2011;6(1):33-6.
10. Henderson PN, Rhoades D, Henderson JA, Welty TK, Buchwald D. Smoking cessation and its determinants among older American Indians: the Strong Heart Study. *Ethnicity & disease*. 2004;14(2):274-9.
11. Hodge F, Nandy K. Factors associated with American Indian cigarette smoking in rural settings. *International journal of environmental research and public health*. 2011;8(4):944-54.
12. Hutchinson PJ, Richardson CG, Bottorff JL. Emergent cigarette smoking, correlations with depression and interest in cessation among Aboriginal adolescents in British Columbia. *Canadian Journal of Public Health*. 2008;99(5):418-22.
13. Johnston V, Thomas DP, McDonnell J, Andrews RM. Maternal smoking and smoking in the household during pregnancy and postpartum: findings from an Indigenous cohort in the Northern Territory. *The Medical journal of Australia*. 2011;194(10):556-9. Epub 2011/06/08.
14. Kendzor DE, Businelle MS, Reitzel LR, Rios DM, Scheuermann TS, Pulvers K, et al. Everyday discrimination is associated with nicotine dependence among African American, Latino, and White smokers. *Nicotine & tobacco research : official journal of the Society for Research on Nicotine and Tobacco*. 2014;16(6):633-40. Epub 2013/12/05.
15. Nez Henderson P, Jacobsen C, Beals J, Team A-S. Correlates of cigarette smoking among selected Southwest and Northern plains tribal groups: the AI-SUPERPPF Study. *American journal of public health*. 2005;95(5):867-72. Epub 2005/04/28.
16. Okamoto SK, Helm S, Pel S, McClain LL, Hill AP, Hayashida JK. Developing empirically based, culturally grounded drug prevention interventions for indigenous youth populations. *The journal of behavioral health services & research*. 2014;41(1):8-19. Epub 2012/11/29.
17. Yu M, Stiffman AR, Freedenthal S. Factors affecting American Indian adolescent tobacco use. *Addictive Behaviors*. 2005;30(5):889-904.

#### *Population level study*

1. Reed MB, Burns DM. A population-based examination of racial and ethnic differences in receiving physicians' advice to quit smoking. *Nicotine and Tobacco Research*. 2008;10(9):1487-94.

*Reviews (reviews conducted on smoking within the defined disadvantaged group but not reporting on perceived barriers to smoking cessation)*

1. Conigrave KM, Lee KS. Smoking or alcohol dependence among Indigenous Australians: treatment may be needed, not just education. *Heart, lung & circulation*. 2012;21(10):626-31. Epub 2012/07/24.
2. Cox LS, Okuyemi K, Choi WS, Ahluwalia JS. A review of tobacco use treatments in U.S. ethnic minority populations. *American journal of health promotion : AJHP*. 2011;25(5 Suppl):S11-30. Epub 2011/04/29.
3. DiGiacomo M, Davidson PM, Abbott PA, Davison J, Moore L, Thompson SC. Smoking cessation in indigenous populations of Australia, New Zealand, Canada, and the United States: elements of effective interventions. *International journal of environmental research and public health*. 2011;8(2):388-410. Epub 2011/05/11.
4. Ivers RG. A review of tobacco interventions for Indigenous Australians. *Australian and New Zealand journal of public health*. 2003;27(3):294-9. Epub 2004/01/07.
5. Johnston V, Westphal DW, Glover M, Thomas DP, Segan C, Walker N. Reducing smoking among indigenous populations: new evidence from a review of trials. *Nicotine & tobacco research : official journal of the Society for Research on Nicotine and Tobacco*. 2013;15(8):1329-38. Epub 2013/03/23.
6. King TK, Borrelli B, Black C, Pinto BM, Marcus BH. Minority women and tobacco: implications for smoking cessation interventions. *Annals of behavioral medicine : a publication of the Society of Behavioral Medicine*. 1997;19(3):301-13. Epub 1997/07/01.
7. Kong G, Singh N, Krishnan-Sarin S. A review of culturally targeted/tailored tobacco prevention and cessation interventions for minority adolescents. *Nicotine & tobacco research : official journal of the Society for Research on Nicotine and Tobacco*. 2012;14(12):1394-406. Epub 2012/05/23.
8. Stolberg VB. A cross-cultural and historical survey of tobacco use among various ethnic groups. *Journal of ethnicity in substance abuse*. 2007;6(3-4):9-80. Epub 2007/01/01.

#### *Studies not meeting the subgroup definition*

1. Bond C, Brough M, Spurling G, Hayman N. 'It had to be my choice' Indigenous smoking cessation and negotiations of risk, resistance and resilience. *Health, Risk & Society*. 2012;14(6):565-81.
2. Haines RJ, Oliffe JL, Bottorff JL, Poland BD. 'The missing picture': tobacco use through the eyes of smokers. *Tobacco control*. 2010;19(3):206-12. Epub 2010/05/27.
3. Johnston V, Thomas DP. What works in Indigenous tobacco control? The perceptions of remote Indigenous community members and health staff. *Health promotion journal of Australia : official journal of Australian Association of Health Promotion Professionals*. 2010;21(1):45-50. Epub 2010/04/22.
4. Kraemer KM, McLeish AC, Jeffries ER, Avallone KM, Luberto CM. Distress tolerance and perceived barriers to smoking cessation. *Substance abuse : official publication of the Association for Medical Education and Research in Substance Abuse*. 2013;34(3):277-82. Epub 2013/07/13.
5. Lubetkin EI, Lu WH, Krebs P, Yeung H, Ostroff JS. Exploring primary care providers' interest in using patient navigators to assist in the delivery of tobacco cessation treatment to low income, ethnic/racial minority patients. *Journal of community health*. 2010;35(6):618-24. Epub 2010/03/26.
6. Renner CC, Enoch C, Patten CA, Ebbert JO, Hurt RD, Moyer TP, et al. Iqmik: a form of smokeless tobacco used among Alaska natives. *American journal of health behavior*. 2005;29(6):588-94. Epub 2005/12/13.
7. Wise M, Massi L, Rose M, Nancarrow H, Conigrave K, Bauman A, et al. Developing and implementing a state-wide Aboriginal health promotion program: the process and factors influencing successful delivery. *Health promotion journal of Australia : official journal of Australian Association of Health Promotion Professionals*. 2012;23(1):25-9. Epub 2012/06/27.

### **Mental illness studies (n = 90)**

#### *Intervention studies*

1. Ames SC, Croghan IT, Clark MM, Patten CA, Stevens SR, Schroeder DR, et al. Change in perceived stress, partner support, decisional balance, and self-efficacy following residential nicotine dependence treatment. *Journal of Addictive Diseases*. 2008;27(1):73-82.
2. Van Dongen CJ, Kriz P, Fox KA, Haque I. A quit smoking group pilot study. *Journal of Psychosocial Nursing & Mental Health Services*. 1999;37(12):31.
3. Weinberger AH, Hitsman B, Papandonatos GD, Sacco KA, Vessicchio JC, George TP. Predictors of abstinence and changes in psychiatric symptoms in a pooled sample of smokers with schizophrenia receiving combination pharmacotherapy and behavioral therapy for smoking cessation. *Journal of Clinical Psychopharmacology*. 2009;29(6):601-3.
4. Williams JM, Ziedonis DM, Vreeland B, Speelman-Edwards N, Zechner MR, Williams MT, et al. A wellness approach to addressing tobacco in mental health settings: learning about healthy living. *American Journal of Psychiatric Rehabilitation*. 2009;12(4):352-69.

#### *No discussion of barriers*

1. Acton GS, Kunz JD, Wilson M, Hall SM. The construct of internalization: conceptualization, measurement, and prediction of smoking treatment outcome. *Psychological Medicine*. 2005;35(3):395-408.
2. Carr S, Lhussier M, Forster N, Geddes L, Deane K, Pennington M, et al. An evidence synthesis of qualitative and quantitative research on component intervention techniques, effectiveness, cost-effectiveness, equity and acceptability of different versions of health-related lifestyle advisor role in improving health. *Health Technology Assessment*. 2011;15(9):1-284.
3. Cooper J, Mancuso SG, Borland R, Slade T, Galletly C, Castle D. Tobacco smoking among people living with a psychotic illness: the second Australian Survey of Psychosis. *The Australian and New Zealand journal of psychiatry*. 2012;46(9):851-63. Epub 2012/05/31.
4. Hapke U, Schumann A, Rumpf HJ, John U, Konerding U, Meyer C. Association of smoking and nicotine dependence with trauma and posttraumatic stress disorder in a general population sample. *The Journal of nervous and mental disease*. 2005;193(12):843-6. Epub 2005/12/02.
5. Kalman D, Morissette SB, George TP. Co-morbidity of smoking in patients with psychiatric and substance use disorders. *The American journal on addictions / American Academy of Psychiatrists in Alcoholism and Addictions*. 2005;14(2):106-23. Epub 2005/07/16.
6. Kelly PJ, Baker AL, Deane FP, Kay-Lambkin FJ, Bonevski B, Tregarthen J. Prevalence of smoking and other health risk factors in people attending residential substance abuse treatment. *Drug and alcohol review*. 2012;31(5):638-44. Epub 2012/05/31.
7. Moeller-Saxone K. Cigarette smoking and interest in quitting among consumers at a psychiatric disability rehabilitation and support service in Victoria. *Australian & New Zealand Journal of Public Health*. 2008;32(5):479-81.
8. Prochaska JJ. Failure to treat tobacco use in mental health and addiction treatment settings: a form of harm reduction? *Drug and alcohol dependence*. 2010;110(3):177-82. Epub 2010/04/10.
9. Prochaska JJ. Integrating tobacco treatment into mental health settings. *JAMA: Journal of the American Medical Association*. 2010;304(22):2534-5.
10. Reichler H, Baker A, Lewin T, Carr V. Smoking among in-patients with drug-related problems in an Australian psychiatric hospital. *Drug and alcohol review*. 2001;20(2):231-7.
11. Suplee PD. The importance of providing smoking relapse counseling during the postpartum hospitalization. *JOGNN: Journal of Obstetric, Gynecologic & Neonatal Nursing*. 2005;34(6):703-12.

1  
2  
3  
4  
5  
6  
7  
8  
9  
10  
11  
12  
13  
14  
15  
16  
17  
18  
19  
20  
21  
22  
23  
24  
25  
26  
27  
28  
29  
30  
31  
32  
33  
34  
35  
36  
37  
38  
39  
40  
41  
42  
43  
44  
45  
46  
47  
48  
49  
50  
51  
52  
53  
54  
55  
56  
57  
58  
59  
60

12. Wye PM, Bowman JA, Wiggers JH, Baker A, Knight J, Carr VJ, et al. Smoking restrictions and treatment for smoking: policies and procedures in psychiatric inpatient units in Australia. *Psychiatric services* (Washington, DC). 2009;60(1):100-7. Epub 2008/12/31.

*No discussion of barriers to smoking cessation (e.g. might be barriers to accessing health care in general)*

1. Carmody TP, McFall M, Saxon AJ, Malte CA, Chow B, Joseph AM, et al. Smoking outcome expectancies in military veteran smokers with posttraumatic stress disorder. *Nicotine & tobacco research : official journal of the Society for Research on Nicotine and Tobacco*. 2012;14(8):919-26. Epub 2012/01/25.

2. Carton S, Jouvent R, Widlocher D. Nicotine dependence and motives for smoking in depression. *Journal of substance abuse*. 1994;6(1):67-76.

3. Kelly DL, Raley HG, Lo S, Wright K, Liu F, McMahan RP, et al. Perception of smoking risks and motivation to quit among nontreatment-seeking smokers with and without schizophrenia. *Schizophrenia bulletin*. 2012;38(3):543-51. Epub 2010/11/03.

4. Thornton LK, Baker AL, Lewin TJ, Kay-Lambkin FJ, Kavanagh D, Richmond R, et al. Reasons for substance use among people with mental disorders. *Addictive behaviors*. 2012;37(4):427-34. Epub 2011/12/27.

5. Torchalla I, Okoli CT, Malchy L, Johnson JL. Nicotine dependence and gender differences in smokers accessing community mental health services. *Journal of psychiatric and mental health nursing*. 2011;18(4):349-58. Epub 2011/03/23.

*Not reporting the perceived self-reported barriers to smoking cessation (e.g. might report results of logistic regressions showing nicotine dependence associated with cessation success)*

1. Alvarado GF, Breslau N. Smoking and young people's mental health. *Current Opinion in Psychiatry*. 2005;18(4):397-400.

2. Anderson AE, Bowman JA, Knight J, Wye PM, Terry M, Grimshaw S, et al. Smoking cessation care provision and support procedures in Australian community mental health centers. *Psychiatric services* (Washington, DC). 2013;64(7):707-10. Epub 2013/07/04.

3. Apodaca TR, Abrantes AM, Strong DR, Ramsey SE, Brown RA. Readiness to change smoking behavior in adolescents with psychiatric disorders. *Addictive behaviors*. 2007;32(6):1119-30. Epub 2006/09/05.

4. Ashton M, Miller CL, Bowden JA, Bertossa S. People with mental illness can tackle tobacco. *Australian & New Zealand Journal of Psychiatry*. 2010;44(11):1021-8.

5. Blalock J, Robinson J, Wetter D, Cinciripini P. Relationship of DSM-IV-based depressive disorders to smoking cessation and smoking reduction in pregnant smokers. *American Journal on Addictions*. 2006;15(4):268-77.

6. Bonevski B, Bowman J, Richmond R, Bryant J, Wye P, Stockings E, et al. Turning of the tide: changing systems to address smoking for people with a mental illness. *Mental Health and Substance Use*. 2011;4(2):116-29.

7. Burgess ES, Brown RA, Kahler CW, Niaura R, Abrams DB, Goldstein MG, et al. Patterns of change in depressive symptoms during smoking cessation: who's at risk for relapse? *Journal of consulting and clinical psychology*. 2002;70(2):356-61. Epub 2002/04/16.

8. Compton MT, Daumit GL, Druss BG. Cigarette smoking and overweight/obesity among individuals with serious mental illnesses: a preventive perspective. *Harvard review of psychiatry*. 2006;14(4):212-22. Epub 2006/08/17.



- 1
  - 2
  - 3
  - 4
  - 5
  - 6
  - 7
  - 8
  - 9
  - 10
  - 11
  - 12
  - 13
  - 14
  - 15
  - 16
  - 17
  - 18
  - 19
  - 20
  - 21
  - 22
  - 23
  - 24
  - 25
  - 26
  - 27
  - 28
  - 29
  - 30
  - 31
  - 32
  - 33
  - 34
  - 35
  - 36
  - 37
  - 38
  - 39
  - 40
  - 41
  - 42
  - 43
  - 44
  - 45
  - 46
  - 47
  - 48
  - 49
  - 50
  - 51
  - 52
  - 53
  - 54
  - 55
  - 56
  - 57
  - 58
  - 59
  - 60
9. Cook JW, McFall MM, Calhoun PS, Beckham JC. Posttraumatic stress disorder and smoking relapse: A theoretical model. *Journal of traumatic stress*. 2007;20(6):989-98. Epub 2007/12/25.
10. Cosci F, Corlando A, Fornai E, Pistelli F, Paoletti P, Carrozzi L. Nicotine dependence, psychological distress and personality traits as possible predictors of smoking cessation. Results of a double-blind study with nicotine patch. *Addictive behaviors*. 2009;34(1):28-35.
11. Culhane MA, Schoenfeld DA, Barr RS, Cather C, Deckersbach T, Freudenreich O, et al. Predictors of early abstinence in smokers with schizophrenia. *Journal of Clinical Psychiatry*. 2008;69(11):1743-50.
12. Hall SM, Prochaska JJ. Treatment of smokers with co-occurring disorders: emphasis on integration in mental health and addiction treatment settings. *Annual review of clinical psychology*. 2009;5:409-31. Epub 2009/03/31.
13. Japuntich SJ, Smith SS, Jorenby DE, Piper ME, Fiore MC, Baker TB. Depression predicts smoking early but not late in a quit attempt. *Nicotine & Tobacco Research*. 2007;9(6):677-86.
14. Killen JD, Fortmann SP, Kraemer HC, Varady AN, Davis L, Newman B. Interactive effects of depression symptoms, nicotine dependence, and weight change on late smoking relapse. *Journal of Consulting & Clinical Psychology*. 1996;64(5):1060-7.
15. Lan T-H, Chiu H-J, Wu B-J, Hung T-H, Hu T-M. Readiness to quit and smoking reduction outcomes. *American Journal of Psychiatry*. 2007;164(5):827-8; author reply 8.
16. Levine MD, Marcus MD, Kalarchian MA, Houck PR, Cheng Y. Weight concerns, mood, and postpartum smoking relapse. *American Journal of Preventive Medicine*. 2010;39(4):345-51.
17. Levine MD, Marcus MD, Kalarchian MA, Weissfeld L, Qin L. Weight concerns affect motivation to remain abstinent from smoking postpartum. *Annals of Behavioral Medicine*. 2006;32(2):147-53.
18. McGee R, Williams S, Stanton W. Is mental health in childhood a major predictor of smoking in adolescence? *Addiction (Abingdon, England)*. 1998;93(12):1869-74. Epub 1999/02/02.
19. Mezuk B, Rafferty JA, Kershaw KN, Hudson D, Abdou CM, Lee H, et al. Reconsidering the role of social disadvantage in physical and mental health: stressful life events, health behaviors, race, and depression. *American journal of epidemiology*. 2010;172(11):1238-49. Epub 2010/10/05.
20. Minami H, McCarthy DE, Jorenby DE, Baker TB. An ecological momentary assessment analysis of relations among coping, affect and smoking during a quit attempt. *Addiction (Abingdon, England)*. 2011;106(3):641-50.
21. Morris CD, May MG, Devine K, Smith S, DeHay T, Mahalik J. Multiple perspectives on tobacco use among youth with mental health disorders and addictions. *American journal of health promotion : AJHP*. 2011;25(5 Suppl):S31-7. Epub 2011/04/29.
22. Mullane JC, Stewart SH, Rhyno E, Steeves D, Watt M, Eisner A. Anxiety, sensitivity and difficulties with smoking cessation. *Columbus, Alexandra M [Ed]*. 2008;54:141-55.
23. Olivier D, Lubman DI, Fraser R. Tobacco smoking within psychiatric inpatient settings: biopsychosocial perspective. *Australian & New Zealand Journal of Psychiatry*. 2007;41(7):572-80.
24. Palm KM, Abrantes AM, Strong DR, Ramsey SE, Brown RA. Smoking Characteristics of Adolescent Smokers With Post-traumatic Stress Disorder in a Psychiatric Inpatient Setting. *Journal of Dual Diagnosis*. 2009;5(1):14-29.
25. Piper ME, Cook JW, Schlam TR, Jorenby DE, Baker TB. Anxiety diagnoses in smokers seeking cessation treatment: relations with tobacco dependence, withdrawal, outcome and response to treatment. *Addiction (Abingdon, England)*. 2011;106(2):418-27.
26. Prochaska JJ, Rossi JS, Redding CA, Rosen AB, Tsoh JY, Humfleet GL, et al. Depressed smokers and stage of change: implications for treatment interventions. *Drug & Alcohol Dependence*. 2004;76(2):143-51.
27. Reid MS, Jiang H, Fallon B, Sonne S, Rinaldi P, Turrigiano E, et al. Smoking cessation treatment among patients in community-based substance abuse rehabilitation programs: exploring predictors of outcome as clues toward treatment improvement. *The American journal of drug and alcohol abuse*. 2011;37(5):472-8. Epub 2011/08/23.

- 1
  - 2
  - 3
  - 4
  - 5
  - 6
  - 7
  - 8
  - 9
  - 10
  - 11
  - 12
  - 13
  - 14
  - 15
  - 16
  - 17
  - 18
  - 19
  - 20
  - 21
  - 22
  - 23
  - 24
  - 25
  - 26
  - 27
  - 28
  - 29
  - 30
  - 31
  - 32
  - 33
  - 34
  - 35
  - 36
  - 37
  - 38
  - 39
  - 40
  - 41
  - 42
  - 43
  - 44
  - 45
  - 46
  - 47
  - 48
  - 49
  - 50
  - 51
  - 52
  - 53
  - 54
  - 55
  - 56
  - 57
  - 58
  - 59
  - 60
28. Reilly P, Murphy L, Alderton D. Challenging the smoking culture within a mental health service supportively. *International Journal of Mental Health Nursing*. 2006;15(4):272-8.
29. Richards CS, Cohen LM, Morrell HE, Watson NL, Low BE. Treating depressed and anxious smokers in smoking cessation programs. *Journal of consulting and clinical psychology*. 2013;81(2):263-73. Epub 2012/03/21.
30. Selby P, Voci SC, Zawertailo LA, George TP, Brands B. Individualized smoking cessation treatment in an outpatient setting: Predictors of outcome in a sample with psychiatric and addictions co-morbidity. *Addictive behaviors*. 2010;35(9):811-7.
31. Stein MD, Anderson BJ, Niaura R. Smoking cessation patterns in methadone-maintained smokers. *Nicotine and Tobacco Research*. 2007;9(3):421-8.
32. Swan GE, Jack LM, Curry S, Chorost M, Javitz H, McAfee T, et al. Bupropion SR and counseling for smoking cessation in actual practice: Predictors of outcome. *Nicotine and Tobacco Research*. 2003;5(6):911-21.

#### *Population level study*

1. John U, Meyer C, Rumpf HJ, Hapke U. Smoking, nicotine dependence and psychiatric comorbidity--a population-based study including smoking cessation after three years. *Drug and alcohol dependence*. 2004;76(3):287-95. Epub 2004/11/25.

#### *Reviews (reviews conducted on smoking within the defined disadvantaged group but not reporting on perceived barriers to smoking cessation)*

1. Ameringer KJ, Leventhal AM. Applying the tripartite model of anxiety and depression to cigarette smoking: an integrative review. *Nicotine & tobacco research : official journal of the Society for Research on Nicotine and Tobacco*. 2010;12(12):1183-94. Epub 2010/11/03.
2. Arfken CL. E. A review: Depression and smoking. *Ethnicity and Disease*. 2007;17(SUPPL. 3):S3-16-S3-8.
3. Aubin HJ, Rollema H, Svensson TH, Winterer G. Smoking, quitting, and psychiatric disease: a review. *Neuroscience and biobehavioral reviews*. 2012;36(1):271-84. Epub 2011/07/05.
4. Banham L, Gilbody S. Smoking cessation in severe mental illness: what works? *Addiction (Abingdon, England)*. 2010;105(7):1176-89.
5. el-Guebaly N, Cathcart J, Currie S, Brown D, Gloster S. Smoking cessation approaches for persons with mental illness or addictive disorders. *Psychiatric Services*. 2002;53(9):1166-70.
6. Fagerström K, Aubin H. Management of smoking cessation in patients with psychiatric disorders. *Current Medical Research & Opinion*. 2009;25(2):511-8.
7. Fu SS, McFall M, Saxon AJ, Beckham JC, Carmody TP, Baker DG, et al. Post-traumatic stress disorder and smoking: A systematic review. *Nicotine and Tobacco Research*. 2007;9(11):1071-84.
8. Goldberg JO. Successful change in tobacco use in schizophrenia. *Journal of the American Psychiatric Nurses Association*. 2010;16(1):30-5. Epub 2010/01/01.
9. Gyuish J, Passalacqua E, Tajima B, Manser ST. Staff smoking and other barriers to nicotine dependence intervention in addiction treatment settings: a review. *Journal of psychoactive drugs*. 2007;39(4):423-33. Epub 2008/02/29.
10. Hitsman B, Borrelli B, McChargue DE, Spring B, Niaura R. History of depression and smoking cessation outcome: a meta-analysis. *Journal of consulting and clinical psychology*. 2003;71(4):657-63. Epub 2003/08/20.
11. Ischaki E, Gratiou C. Smoking and depression: Is smoking cessation effective? *Therapeutic advances in respiratory disease*. 2009;3(1):31-8.

12. Mathers M, Toumbourou JW, Catalano RF, Williams J, Patton GC. Consequences of youth tobacco use: a review of prospective behavioural studies. *Addiction* (Abingdon, England). 2006;101(7):948-58.
13. Mills EJ, Wu P, Lockhart I, Wilson K, Ebbert JO. Adverse events associated with nicotine replacement therapy (NRT) for smoking cessation. A systematic review and meta-analysis of one hundred and twenty studies involving 177,390 individuals. *Tobacco Induced Diseases*. 2010;8:15p.
14. Mookadam F, Arthur HM. Social support and its relationship to morbidity and mortality after acute myocardial infarction: Systematic overview. *Archives of Internal Medicine*. 2004;164(14):1514-8.
15. Rasmussen AM, Picciotto MR, Krishnan-Sarin S. Smoking as a complex but critical covariate in neurobiological studies of posttraumatic stress disorders: A review. *Journal of Psychopharmacology*. 2006;20(5):693-707.
16. Schroeder SA, Morris CD. Confronting a neglected epidemic: tobacco cessation for persons with mental illnesses and substance abuse problems. *Annual review of public health*. 2010;31:297-314 1p following Epub 2009/12/17.
17. Sharp DL, Blaakman SW. A review of research by nurses regarding tobacco dependence and mental health. *Annual review of nursing research*. 2009;27:297-318.
18. Shirani A, Tremlett H. The effect of smoking on the symptoms and progression of multiple sclerosis: A review. *Journal of Inflammation Research*. 2010;3(1):115-26.
19. Silvani P, Camporesi A. Drug-induced pulmonary hypertension in newborns: A review. *Current Vascular Pharmacology*. 2007;5(2):129-33.
20. Siru R, Hulse GK, Tait RJ. Assessing motivation to quit smoking in people with mental illness: a review. *Addiction* (Abingdon, England). 2009;104(5):719-33. Epub 2009/05/06.
21. Small G, Dubois B. A review of compliance to treatment in Alzheimer's disease: Potential benefits of a transdermal patch. *Current medical research and opinion*. 2007;23(11):2705-13.
22. Torchalla I, Nosen L, Rostam H, Allen P. Integrated treatment programs for individuals with concurrent substance use disorders and trauma experiences: a systematic review and meta-analysis. *Journal of substance abuse treatment*. 2012;42(1):65-77. Epub 2011/11/01.
23. Ziedonis D, Montoya ID. Tobacco Dependence Amongst Individuals with Schizophrenia: A Public Health Crisis and an Opportunity for Bidirectional Translational Research. *Journal of Dual Diagnosis*. 2007;3(3-4):3-7.

#### *Studies not meeting the subgroup definition*

1. Allen SS, Hatsukami DK, Christianson D. Nicotine withdrawal and depressive symptomatology during short-term smoking abstinence: A comparison of postmenopausal women using and not using hormone replacement therapy. *Nicotine and Tobacco Research*. 2003;5(1):49-59.
2. Baker A, Ivers RG, Bowman J, Butler T, Kay-Lambkin FJ, Wye P, et al. Where there's smoke, there's fire: high prevalence of smoking among some sub-populations and recommendations for intervention. *Drug and alcohol review*. 2006;25(1):85-96. Epub 2006/02/24.
3. Gehricke JG, Loughlin SE, Whalen CK, Potkin SG, Fallon JH, Jamner LD, et al. Smoking to self-medicate attentional and emotional dysfunctions. *Nicotine & tobacco research : official journal of the Society for Research on Nicotine and Tobacco*. 2007;9 Suppl 4:S523-36. Epub 2008/08/30.
4. Gierisch JM, Straits-Troster K, Calhoun PS, Beckham JC, Acheson S, Hamlett-Berry K. Tobacco use among Iraq- and Afghanistan-era veterans: a qualitative study of barriers, facilitators, and treatment preferences. *Preventing chronic disease*. 2012;9:E58. Epub 2012/02/18.
5. Gonzalez A, Zvolensky MJ, Vujanovic AA, Leyro TM, Marshall EC. An evaluation of anxiety sensitivity, emotional dysregulation, and negative affectivity among daily cigarette smokers: relation to smoking motives and barriers to quitting. *Journal of psychiatric research*. 2008;43(2):138-47. Epub 2008/04/18.

6. Kraemer KM, McLeish AC, Jeffries ER, Avallone KM, Luberto CM. Distress tolerance and perceived barriers to smoking cessation. *Substance abuse : official publication of the Association for Medical Education and Research in Substance Abuse*. 2013;34(3):277-82. Epub 2013/07/13.
7. Lawn S. Australians with mental illness who smoke. *The British journal of psychiatry : the journal of mental science*. 2001;178(1):85. Epub 2001/01/03.
8. McNeill A, Amos A, McEwen A, Ferguson J, Croghan E. Developing the evidence base for addressing inequalities and smoking in the United Kingdom. *Addiction (Abingdon, England)*. 2012;107 Suppl 2:1-7. Epub 2012/11/21.
9. Moss TG, Weinberger AH, Vessicchio JC, Mancuso V, Cushing SJ, Pett M, et al. A tobacco reconceptualization in psychiatry: toward the development of tobacco-free psychiatric facilities. *American Journal on Addictions*. 2010;19(4):293-311.
10. Nichols L, Martindale-Adams J, Burns R, Coon D, Ory M, Mahoney D, et al. Social marketing as a framework for recruitment: illustrations from the REACH study. *Journal of aging and health*. 2004;16(5 Suppl):157S-76S. Epub 2004/09/28.
11. Prochaska JJ, Sorensen JL, Hall SM, Rossi JS, Redding CA, Rosen AB, et al. Predictors of health functioning in two high-risk groups of smokers. *Drug & Alcohol Dependence*. 2005;78(2):169-75.
12. Shirley DK, Kesari RK, Glesby MJ. Factors associated with smoking in HIV-infected patients and potential barriers to cessation. *AIDS patient care and STDs*. 2013;27(11):604-12. Epub 2013/10/22.
13. Wye P, Bowman J, Wiggers J, Baker A, Knight J, Carr V, et al. Total smoking bans in psychiatric inpatient services: a survey of perceived benefits, barriers and support among staff. *BMC public health*. 2010;10:372. Epub 2010/06/26.

### **Homeless studies (n = 38)**

#### *Intervention studies*

1. Businelle MS, Kendzor DE, Kesh A, Cuate EL, Poonawalla IB, Reitzel LR, et al. Small financial incentives increase smoking cessation in homeless smokers: a pilot study. *Addict Behav*. 2014;39(3):717-20. Epub 2013/12/11.
2. Goldade K, Whembolua GL, Thomas J, Eischen S, Guo H, Connett J, et al. Designing a smoking cessation intervention for the unique needs of homeless persons: a community-based randomized clinical trial. *Clinical trials (London, England)*. 2011;8(6):744-54. Epub 2011/12/15.
3. Monso E, Campbell J, Tonnesen P, Gustavsson G, Morera J. Sociodemographic predictors of success in smoking intervention. *Tobacco control*. 2001;10(2):165-9.
4. Okuyemi KS, Goldade K, Whembolua GL, Thomas JL, Eischen S, Guo H, et al. Smoking characteristics and comorbidities in the power to quit randomized clinical trial for homeless smokers. *Nicotine & tobacco research : official journal of the Society for Research on Nicotine and Tobacco*. 2013;15(1):22-8. Epub 2012/05/17.
5. Okuyemi KS, Thomas JL, Hall S, Nollen NL, Richter KP, Jeffries SK, et al. Smoking cessation in homeless populations: a pilot clinical trial. *Nicotine & tobacco research : official journal of the Society for Research on Nicotine and Tobacco*. 2006;8(5):689-99. Epub 2006/09/30.
6. Shelley D, Cantrell J, Wong S, Warn D. Smoking cessation among sheltered homeless: a pilot. *American journal of health behavior*. 2010;34(5):544-52. Epub 2010/06/09.

#### *No discussion of barriers*

1. Torchalla I, Strehlau V, Okoli CT, Li K, Schuetz C, Krausz M. Smoking and predictors of nicotine dependence in a homeless population. *Nicotine & tobacco research : official journal of the Society for Research on Nicotine and Tobacco*. 2011;13(10):934-42. Epub 2011/05/31.

1  
2  
3  
4  
5  
6  
7  
8  
9  
10  
11  
12  
13  
14  
15  
16  
17  
18  
19  
20  
21  
22  
23  
24  
25  
26  
27  
28  
29  
30  
31  
32  
33  
34  
35  
36  
37  
38  
39  
40  
41  
42  
43  
44  
45  
46  
47  
48  
49  
50  
51  
52  
53  
54  
55  
56  
57  
58  
59  
60

*No discussion of barriers to smoking cessation (e.g. might be barriers to accessing health care in general)*

1. Aloot CB, Vredevoe DL, Brecht ML. Evaluation of high-risk smoking practices used by the homeless. *Cancer nursing*. 1993;16(2):123-30. Epub 1993/04/01.
2. Baggett TP, O'Connell JJ, Singer DE, Rigotti NA. The unmet health care needs of homeless adults: a national study. *American journal of public health*. 2010;100(7):1326-33. Epub 2010/05/15.
3. Baggett TP, Rigotti NA. Cigarette smoking and advice to quit in a national sample of homeless adults. *American journal of preventive medicine*. 2010;39(2):164-72. Epub 2010/07/14.
4. Butler J, Okuyemi KS, Jean S, Nazir N, Ahluwalia JS, Resnicow K. Smoking characteristics of a homeless population. *Substance abuse : official publication of the Association for Medical Education and Research in Substance Abuse*. 2002;23(4):223-31. Epub 2002/11/20.
5. Gelberg L, Andersen RM, Leake BD. The Behavioral Model for Vulnerable Populations: application to medical care use and outcomes for homeless people. *Health services research*. 2000;34(6):1273-302. Epub 2000/02/02.
6. Gelberg L, Gallagher TC, Andersen RM, Koegel P. Competing priorities as a barrier to medical care among homeless adults in Los Angeles. *American journal of public health*. 1997;87(2):217-20. Epub 1997/02/01.
7. Heffron WA, Skipper BJ, Lambert L. Health and lifestyle issues as risk factors for homelessness. *The Journal of the American Board of Family Practice / American Board of Family Practice*. 1997;10(1):6-12.
8. Kushel MB, Vittinghoff E, Haas JS. Factors associated with the health care utilization of homeless persons. *JAMA : the journal of the American Medical Association*. 2001;285(2):200-6. Epub 2001/02/15.
9. Malloy C, Christ MA, Hohloch FJ. The homeless: social isolates. *Journal of community health nursing*. 1990;7(1):25-36. Epub 1990/01/01.
10. McGuire J, Rosenheck R. The quality of preventive medical care for homeless veterans with mental illness. *Journal for Healthcare Quality: Promoting Excellence in Healthcare*. 2005;27(6):26-32.
11. Ober K, Carlson L, Anderson P. Cardiovascular risk factors in homeless adults. *The Journal of cardiovascular nursing*. 1997;11(4):50-9. Epub 1997/07/01.
12. O'Toole TP, Gibbon JL, Hanusa BH, Fine MJ. Utilization of health care services among subgroups of urban homeless and housed poor. *Journal of health politics, policy and law*. 1999;24(1):91-114. Epub 1999/05/26.
13. Padgett D, Struening EL, Andrews H. Factors affecting the use of medical, mental health, alcohol, and drug treatment services by homeless adults. *Medical care*. 1990;28(9):805-21. Epub 1990/09/01.
14. Robertson MJ, Cousineau MR. Health status and access to health services among the urban homeless. *American journal of public health*. 1986;76(5):561-3. Epub 1986/05/01.
15. Thompson SJ. Risk/protective factors associated with substance use among runaway/homeless youth utilizing emergency shelter services nationwide. *Substance Abuse*. 2004;25(3):13-26.
16. Thompson SJ, Zittell-Palamara KM, Forehand G. Risk factors for cigarette, alcohol, and marijuana use among runaway youth utilizing two services sectors. *Journal of Child & Adolescent Substance Abuse*. 2005;15(1):17-36.
17. Wojtusik L, White MC. Health status, needs, and health care barriers among the homeless. *Journal of health care for the poor and underserved*. 1998;9(2):140-52. Epub 1999/03/12.

*Not reporting the perceived self-reported barriers to smoking cessation (e.g. might report results of logistic regressions showing nicotine dependence associated with cessation success)*

1. Baggett TP, Anderson R, Freyder PJ, Jarvie JA, Maryman K, Porter J, et al. Addressing tobacco use in homeless populations: a survey of health care professionals. *Journal of health care for the poor and underserved*. 2012;23(4):1650-9. Epub 2012/01/01.
2. Baggett TP, Lebrun-Harris LA, Rigotti NA. Homelessness, cigarette smoking and desire to quit: results from a US national study. *Addiction (Abingdon, England)*. 2013;108(11):2009-18. Epub 2013/07/10.
3. Bassuk EL, Buckner JC, Perloff JN, Bassuk SS. Prevalence of mental health and substance use disorders among homeless and low-income housed mothers. *The American journal of psychiatry*. 1998;155(11):1561-4. Epub 1998/11/13.
4. Diaz T, Dusenbury L, Botvin GJ, Farmer-Huselid R. Factors associated with drug use among youth living in homeless shelters. *Journal of Child & Adolescent Substance Abuse*. 1997;6(1):91-110.
5. Greene JM, Ennett ST, Ringwalt CL. Substance use among runaway and homeless youth in three national samples. *American journal of public health*. 1997;87(2):229-35.
6. Kim DH, Daskalakis C, Plumb JD, Adams S, Brawer R, Orr N, et al. Modifiable cardiovascular risk factors among individuals in low socioeconomic communities and homeless shelters. *Family & community health*. 2008;31(4):269-80. Epub 2008/09/17.
7. Lee TC, Hanlon JG, Ben-David J, Booth GL, Cantor WJ, Connelly PW, et al. Risk factors for cardiovascular disease in homeless adults. *Circulation*. 2005;111(20):2629-35.
8. Thompson RG, Hasin DS. Cigarette, marijuana, and alcohol use and prior drug treatment among newly homeless young adults in New York City: Relationship to a history of foster care. *Drug and alcohol dependence*. 2011;117(1):66-9. Epub 2011/02/04.

*Reviews (reviews conducted on smoking within the defined disadvantaged group but not reporting on perceived barriers to smoking cessation)*

1. Baggett TP, Tobey ML, Rigotti NA. Tobacco use among homeless people--addressing the neglected addiction. *The New England journal of medicine*. 2013;369(3):201-4. Epub 2013/07/19.
2. Fazel S, Khosla V, Doll H, Geddes J. The prevalence of mental disorders among the homeless in western countries: systematic review and meta-regression analysis. *PLoS medicine*. 2008;5(12):e225. Epub 2008/12/05.
3. Hwang SW, Tolomiczenko G, Kouyoumdjian FG, Garner RE. Interventions to improve the health of the homeless: a systematic review. *American journal of preventive medicine*. 2005;29(4):311-9. Epub 2005/10/26.

*Studies not meeting the subgroup definition*

1. Cousineau MR. Health status of and access to health services by residents of urban encampments in Los Angeles. *Journal of health care for the poor and underserved*. 1997;8(1):70-82. Epub 1997/02/01.
2. Epstein JA, Williams C, Botvin GJ, Diaz T, Ifill-Williams M. Psychosocial predictors of cigarette smoking among adolescents living in public housing developments. *Tobacco control*. 1999;8(1):45-52.
3. Kruger TM, Howell BM, Haney A, Davis RE, Fields N, Schoenberg NE. Perceptions of smoking cessation programs in rural Appalachia. *American journal of health behavior*. 2012;36(3):373-84. Epub 2012/03/01.

## Prisoner studies (n = 22)

### *Intervention studies*

1. Berg CJ, Ahluwalia JS, Cropsey K. Predictors of adherence to behavioral counseling and medication among female prisoners enrolled in a smoking cessation trial. *Journal of correctional health care : the official journal of the National Commission on Correctional Health Care.* 2013;19(4):236-47. Epub 2013/08/21.
2. Cropsey K, Eldridge G, Weaver M, Villalobos G, Stitzer M, Best A. Smoking cessation intervention for female prisoners: addressing an urgent public health need. *American journal of public health.* 2008;98(10):1894-901.
3. Cropsey KL, Jackson DO, Hale GJ, Carpenter MJ, Stitzer ML. Impact of self-initiated pre-quit smoking reduction on cessation rates: results of a clinical trial of smoking cessation among female prisoners. *Addictive behaviors.* 2011;36(1-2):73-8. Epub 2010/10/05.
4. Cropsey KL, McClure LA, Jackson DO, Villalobos GC, Weaver MF, Stitzer ML. The impact of quitting smoking on weight among women prisoners participating in a smoking cessation intervention. *American journal of public health.* 2010;100(8):1442-8.
5. Khavjou OA, Clarke J, Hofeldt RM, Lihs P, Loo RK, Prabhu M, et al. A Captive Audience. Bringing the WISEWOMAN Program to South Dakota Prisoners. *Women's Health Issues.* 2007;17(4):193-201.

### *No discussion of barriers*

1. Foley KL, Proescholdbell S, Herndon Malek S, Johnson J. Implementation and enforcement of tobacco bans in two prisons in North Carolina: a qualitative inquiry. *Journal of correctional health care : the official journal of the National Commission on Correctional Health Care.* 2010;16(2):98-105. Epub 2010/03/27.
2. Kauffman RM, Ferketich AK, Murray DM, Bellair PE, Wewers ME. Measuring tobacco use in a prison population. *Nicotine & Tobacco Research.* 2010;12(6):582-8.
3. Kauffman RM, Ferketich AK, Wewers ME. Tobacco policy in American prisons, 2007. *Tobacco control.* 2008;17(5):357-60.

### *Not reporting the perceived self-reported barriers to smoking cessation (e.g. might report results of logistic regressions showing nicotine dependence associated with cessation success)*

1. Belcher JM, Butler T, Richmond RL, Wodak AD, Wilhelm K. Smoking and its correlates in an Australian prisoner population. *Drug and Alcohol Review.* 2006;25(4):343-8.
2. Cropsey K, Eldridge GD, Ladner T. Smoking among female prisoners: an ignored public health epidemic. *Addictive behaviors.* 2004;29(2):425-31. Epub 2004/01/21.
3. Cropsey KL, Linker JA, Waite DE. An analysis of racial and sex differences for smoking among adolescents in a juvenile correctional center. *Drug & Alcohol Dependence.* 2008;92(1-3):156-63.
4. Durrah TL. Correlates of daily smoking among female arrestees in New York City and Los Angeles, 1997. *American journal of public health.* 2005;95(10):1788-92.
5. El-Guebaly N, Cathcart J, Currie S, Brown D, Gloster S. Public health and therapeutic aspects of smoking bans in mental health and addiction settings. *Psychiatric services (Washington, DC).* 2002;53(12):1617-22. Epub 2002/12/04.
6. Lekka NP, Lee KH, Argyriou AA, Beratis S, Parks RW. Association of cigarette smoking and depressive symptoms in a forensic population. *Depression and Anxiety.* 2007;24(5):325-30.

7. Lincoln T, Tuthill RW, Roberts CA, Kennedy S, Hammett TM, Langmore-Avila E, et al. Resumption of smoking after release from a tobacco-free correctional facility. *Journal of Correctional Health Care*. 2009;15(3):190-6.
8. Makris E, Gourgoulis KI, Hatzoglou C. Prisoners and cigarettes or 'imprisoned in cigarettes'? What helps prisoners quit smoking? *BMC public health*. 2012;12:508. Epub 2012/07/10.
9. Nijhawan AE, Salloway R, Nunn AS, Poshkus M, Clarke JG. Preventive healthcare for underserved women: results of a prison survey. *Journal of women's health (2002)*. 2010;19(1):17-22. Epub 2010/01/22.
10. Ramaswamy M, Faseru B, Cropsey KL, Jones M, Deculus K, Freudenberg N. Factors associated with smoking among adolescent males prior to incarceration and after release from jail: a longitudinal study. *Substance abuse treatment, prevention, and policy*. 2013;8(1):37. Epub 2013/11/02.
11. Richmond RL, Wilhelm KA, Indig D, Butler TG, Archer VA, Wodak AD. Cardiovascular risk among Aboriginal and non-Aboriginal smoking male prisoners: inequalities compared to the wider community. *BMC public health*. 2011;11:783. Epub 2011/10/12.
12. Thibodeau L, Jorenby DE, Seal DW, Kim SY, Sosman JM. Prerelease intent predicts smoking behavior postrelease following a prison smoking ban. *Nicotine and Tobacco Research*. 2010;12(2):152-8.

*Reviews (reviews conducted on smoking within the defined disadvantaged group but not reporting on perceived barriers to smoking cessation)*

1. Donahue JJ. Tobacco Smoking Among Incarcerated Individuals: A Review of the Nature of the Problem and What is Being Done in Response. *Journal of Offender Rehabilitation*. 2009;48(7):589-604.

*Studies not meeting the subgroup definition*

1. Dickens GL, Stubbs JH, Haw CM. Smoking and mental health nurses: a survey of clinical staff in a psychiatric hospital. *Journal of psychiatric and mental health nursing*. 2004;11(4):445-51. Epub 2004/07/17.

#### **At risk youth studies (n = 48)**

*Intervention studies*

1. Horn K, Dino G, Kalsekar I, Massey CJ, Manzo-Tennant K, McGloin T. Exploring the relationship between mental health and smoking cessation: a study of rural teens. *Prevention science : the official journal of the Society for Prevention Research*. 2004;5(2):113-26. Epub 2004/05/12.
2. Kelly AB. Predictors of response to brief smoking cessation interventions for adolescents who have contravened school smoking policy. *Journal of Substance Use*. 2008;13(4):219-24.

*No discussion of barriers*

1. Akers RL, Lee G. A longitudinal test of social learning theory: Adolescent smoking. *Journal of Drug Issues*. 1996;26(2):317-43.



- 1  
2  
3 2. Hanson MJ. The theory of planned behavior applied to cigarette smoking in African-  
4 American, Puerto Rican, and non-Hispanic white teenage females. *Nursing research*. 1997;46(3):155-  
5 62.  
6  
7

8  
9 *No discussion of barriers to smoking cessation (e.g. might be barriers to accessing health care in*  
10 *general)*  
11

- 12 1. Diaz T, Dusenbury L, Botvin GJ, Farmer-Huselid R. Factors associated with drug use among  
13 youth living in homeless shelters. *Journal of Child & Adolescent Substance Abuse*. 1997;6(1):91-110.  
14 2. Donaghy E, Bauld L, Eadie D, McKell J, Pringle B, Amos A. A qualitative study of how young  
15 Scottish smokers living in disadvantaged communities get their cigarettes. *Nicotine & tobacco*  
16 *research : official journal of the Society for Research on Nicotine and Tobacco*. 2013;15(12):2053-9.  
17 Epub 2013/08/06.  
18 3. Hansen WB, Collins LM, Johnson CA, Graham JW. Self-initiated smoking cessation among  
19 high school students. *Addictive Behaviors*. 1985;10(3):265-71.  
20 4. Lipperman-Kreda S, Paschall MJ, Grube JW. Perceived enforcement of school tobacco policy  
21 and adolescents' cigarette smoking. *Preventive Medicine*. 2009;48(6):562-6.  
22  
23  
24  
25

26 *Not carried out in high income country/not published in English*  
27

- 28 1. Malhotra C, Sharma N, Saxena R, Ingle GK. Drug use among juveniles in conflict with the law.  
29 *Indian Journal of Pediatrics*. 2007;74(4):353-6.  
30 2. Manolova A. Adolescent smoking and social environment. *Archives of the Balkan Medical*  
31 *Union*. 2005;40(1):7-11.  
32 3. Ng N, Weinehall L, Ohman A. 'If I don't smoke, I'm not a real man' Indonesian teenage boys'  
33 views about smoking. *Health education research*. 2007;22(6):794-804.  
34  
35  
36  
37

38 *Not reporting the perceived self-reported barriers to smoking cessation (e.g. might report results of*  
39 *logistic regressions showing nicotine dependence associated with cessation success)*  
40  
41

- 42 1. Bean MK, Mitchell KS, Speizer IS, Wilson DB, Smith BN, Fries EA. Rural adolescent attitudes  
43 toward smoking and weight loss: relationship to smoking status. *Nicotine & tobacco research :*  
44 *official journal of the Society for Research on Nicotine and Tobacco*. 2008;10(2):279-86. Epub  
45 2008/02/01.  
46 2. Beebe LA, Vesely SK, Oman RF, Tolma E, Aspy CB, Rodine S. Protective assets for non-use of  
47 alcohol, tobacco and other drugs among urban American Indian youth in Oklahoma. *Maternal and*  
48 *child health journal*. 2008;12(SUPPL. 1):S82-S90.  
49 3. Belgrave FZ, Johnson J, Nguyen A, Hood K, Tademy R, Clark T, et al. Stress and tobacco use  
50 among African-American adolescents: the buffering effect of cultural factors. *Journal of Drug*  
51 *Education*. 2010;40(2):173-88.  
52 4. Booker CL, Gallaher P, Unger JB, Ritt-Olson A, Johnson CA. Stressful life events, smoking  
53 behavior, and intentions to smoke among and multiethnic sample of sixth graders. *Ethnicity &*  
54 *health*. 2004;9(4):369-97.  
55 5. Colgan Y, Turnbull DA, Mikocka-Walus AA, Delfabbro P. Determinants of resilience to  
56 cigarette smoking among young Australians at risk: An exploratory study. *Tobacco Induced Diseases*.  
57 2010;8(1).  
58  
59  
60

6. Conwell LS, O'Callaghan MJ, Andersen MJ, Bor W, Najman JM, Williams GM. Early adolescent smoking and a web of personal and social disadvantage. *Journal of Paediatrics & Child Health*. 2003;39(8):580-5.
7. Dozois DN, Farrow JA, Miser A. Smoking patterns and cessation motivations during adolescence. *The International journal of the Addictions*. 1995;30(11):1485-98. Epub 1995/09/01.
8. Fettes DL, Aarons GA. Smoking behavior of US youths: a comparison between child welfare system and community populations. *American journal of public health*. 2011;101(12):2342-8.
9. Flynn BS, Worden JK, Secker-Walker RH, Pirie PL, Badger GJ, Carpenter JH. Long-term responses of higher and lower risk youths to smoking prevention interventions. *Preventive Medicine*. 1997;26(3):389-94.
10. Frohlich KL, Mykhalovskiy E, Poland BD, Haines-Saah R, Johnson J. Creating the socially marginalised youth smoker: the role of tobacco control. *Sociology of health & illness*. 2012;34(7):978-93. Epub 2012/03/06.
11. Glanz K, Mau M, Steffen A, Maskarinec G, Arriola KJ. Tobacco use among Native Hawaiian middle school students: Its prevalence, correlates and implications. *Ethnicity and Health*. 2007;12(3):227-44.
12. Hansen WB. Behavioral predictors of abstinence: early indicators of a dependence on tobacco among adolescents. *International Journal of the Addictions*. 1983;18(7):913-20.
13. Hanson MJ. An examination of ethnic differences in cigarette smoking intention among female teenagers. *Journal of the American Academy of Nurse Practitioners*. 2005;17(4):149-55.
14. Hanson MJS. African-American adolescents' intentions to smoke cigarettes: an application of the Theory of Planned Behavior. *Journal of Gender, Culture, & Health*. 1996;1(2):125-34.
15. Indig D, Haysom L. Smoking behaviours among young people in custody in New South Wales, Australia. *Drug and alcohol review*. 2012;31(5):631-7. Epub 2012/03/08.
16. Karcher MJ, Finn L. How connectedness contributes to experimental smoking among rural youth: developmental and ecological analyses. *Journal of Primary Prevention*. 2005;26(1):25-36.
17. Kerby DS, Brand MW, John R. Anger types and the use of cigarettes and smokeless tobacco among Native American adolescents. *Preventive Medicine*. 2003;37(5):485-91.
18. Leff MK, Moolchan ET, Cookus BA, Spurgeon L, Evans LA, London ED, et al. Predictors of smoking initiation among at risk youth: A controlled study. *Journal of Child & Adolescent Substance Abuse*. 2003;13(1):59-76.
19. LeMaster PL, Connell CM, Mitchell CM, Manson SM. Tobacco use among American Indian adolescents: protective and risk factors. *Journal of Adolescent Health*. 2002;30(6):426-32.
20. Ramsey SE, Brown RA, Strong DR, Sales SD. Cigarette smoking among adolescent psychiatric inpatients: Prevalence and correlates. *Annals of Clinical Psychiatry*. 2002;14(3):149-53.
21. Yu M, Stiffman AR, Freedenthal S. Factors affecting American Indian adolescent tobacco use. *Addictive Behaviors*. 2005;30(5):889-904.

*Reviews (reviews conducted on smoking within the defined disadvantaged group but not reporting on perceived barriers to smoking cessation)*

1. Cengelli S, O'Loughlin J, Lauzon B, Cornuz J. A systematic review of longitudinal population-based studies on the predictors of smoking cessation in adolescent and young adult smokers. *Tobacco control*. 2012;21(3):355-62. Epub 2011/08/19.
2. Johnston V, Westphal DW, Glover M, Thomas DP, Segan C, Walker N. Reducing smoking among indigenous populations: new evidence from a review of trials. *Nicotine & tobacco research : official journal of the Society for Research on Nicotine and Tobacco*. 2013;15(8):1329-38. Epub 2013/03/23.

*Studies not meeting the subgroup definition*

1. Abernathy TJ, Bertrand LD. The prevalence of smokeless tobacco and cigarette use among sixth, seventh and eighth grade students: a longitudinal investigation. *Canadian Journal of Public Health*. 1992;83(1):15-8.
2. Audrain-McGovern J, Rodriguez D, Epstein LH, Rodgers K, Cuevas J, Wileyto EP. Young adult smoking: What factors differentiate ex-smokers, smoking cessation treatment seekers and nontreatment seekers? *Addictive Behaviors*. 2009;34(12):1036-41.
3. Barber P, Lopez-Valcarcel BG, Pinilla J, Santana Y, Calvo JR, Lopez A. Attitudes of teenagers towards cigarettes and smoking initiation. *Substance use & misuse*. 2005;40(5):625-43.
4. Leatherdale ST, Ahmed R. Alcohol, marijuana, and tobacco use among Canadian youth: do we need more multi-substance prevention programming? *Journal of Primary Prevention*. 2010;31(3):99-108.
5. Leatherdale ST, Ahmed R, Vu M. Factors associated with different cigarette access behaviours among underage smoking youth who usually smoke contraband (Native) cigarettes. *Canadian Journal of Public Health*. 2011;102(2):103-7.
6. Leatherdale ST, McDonald PW. Youth smokers' beliefs about different cessation approaches: are we providing cessation interventions they never intend to use? *Cancer Causes & Control*. 2007;18(7):783-91.
7. Leatherdale ST, McDonald PW, Cameron R, Jolin MA, Brown KS. A multi-level analysis examining how smoking friends, parents, and older students in the school environment are risk factors for susceptibility to smoking among non-smoking elementary school youth. *Prevention Science*. 2006;7(4):397-402.
8. Leavy J, Wood L, Phillips F, Rosenberg M. Try and try again--qualitative insights into adolescent smoking experimentation and notions of addiction. *Health Promotion Journal of Australia*. 2010;21(3):208-14.
9. Leeman RF, Schepis TS, Cavallo DA, McFetridge AK, Liss TB, Krishnan-Sarin S. Nicotine dependence severity as a cross-sectional predictor of alcohol-related problems in a sample of adolescent smokers. *Nicotine & tobacco research : official journal of the Society for Research on Nicotine and Tobacco*. 2010;12(5):521-4.
10. Lowry R, Cohen LR, Modzeleski W, Kann L, Collins JL, Kolbe LJ. School violence, substance use, and availability of illegal drugs on school property among US high school students. *Journal of School Health*. 1999;69(9):347-55.
11. Maes HH, Woodard CE, Murrelle L, Meyer JM, Silberg JL, Hewitt JK, et al. Tobacco, alcohol and drug use in eight- to sixteen-year-old twins: the Virginia Twin Study of Adolescent Behavioral Development. *Journal of Studies on Alcohol*. 1999;60(3):293-305.
12. McGee R, Stanton WR. A longitudinal study of reasons for smoking in adolescence. *Addiction (Abingdon, England)*. 1993;88(2):265-71.
13. Milton B, Cook PA, Dugdill L, Porcellato L, Springett J, Woods SE. Why do primary school children smoke? A longitudinal analysis of predictors of smoking uptake during pre-adolescence. *Public Health*. 2004;118(4):247-55.
14. Milton MH, Maule CO, Backinger CL, Gregory DM. Recommendations and guidance for practice in youth tobacco cessation. *American journal of health behavior*. 2003;27:S159-69.

Supplementary file 2. Summaries of the included quantitative studies by disadvantaged group (n = 8).

| Author, Year, Country                | Study aims                                                                                                                         | Setting                                                  | Sample                                                                                                        | Response rate | Type of survey (cross-sectional, etc) | Outcome measure (and info on survey instrument)                                                                                       | Barriers to quitting (type and prevalence)                                                                                                                                                                                                                                                                                                                                                                                                       |
|--------------------------------------|------------------------------------------------------------------------------------------------------------------------------------|----------------------------------------------------------|---------------------------------------------------------------------------------------------------------------|---------------|---------------------------------------|---------------------------------------------------------------------------------------------------------------------------------------|--------------------------------------------------------------------------------------------------------------------------------------------------------------------------------------------------------------------------------------------------------------------------------------------------------------------------------------------------------------------------------------------------------------------------------------------------|
| <b>Quantitative studies</b>          |                                                                                                                                    |                                                          |                                                                                                               |               |                                       |                                                                                                                                       |                                                                                                                                                                                                                                                                                                                                                                                                                                                  |
| <b>Low SES groups</b>                |                                                                                                                                    |                                                          |                                                                                                               |               |                                       |                                                                                                                                       |                                                                                                                                                                                                                                                                                                                                                                                                                                                  |
| Price 1994(60)<br><br>USA            | Assess the perceptions of lung cancer and smoking in a socioeconomically disadvantaged sample.                                     | Telephone interviews in Ohio, USA.                       | n = 500<br>49% female<br>Age: mean = 58, SD = 18.2<br>Ethnicity: white (83%)                                  | 42%           | Cross-sectional.                      | Pre-designed survey instrument based on the Health Belief Model – 45 items.<br><br>Barriers: 5 items.<br>.79 reliability coefficient. | Habit: 82%<br>Prevents boredom: 48%<br>Helps to relax: 52%<br>Addiction: 86%<br>Many friends of smokers also smoke: 66%                                                                                                                                                                                                                                                                                                                          |
| Rosenthal et al 2013 (70)<br><br>USA | Identify the most endorse barriers and motivations to quitting an sociodemographic differences in the barriers to quitting report. | Six low income neighbourhoods in new haven, Connecticut. | n = 350<br>Ethnicity: 61% Black<br>20% Latino<br>12% White<br>Education: 56% High school diploma/ GED or less | 73%           | Cross-sectional                       | Gender, race/ethnicity, educational attainment, age, smoking status.<br>Barriers measure based on pre-existing survey (7 items).      | <i>Intrapersonal barriers</i><br>I don't want to quit: 37.4%<br>It is too difficult: 57.7%<br>I don't know how: 24.9%<br>I am afraid of gaining weight : 19.7%<br><i>Financial barrier</i><br>I can't afford the medication or nicotine replacement therapy products (such as the patch or gum): 30.9%<br><i>Support barrier</i><br>I don't have enough support: 25.7%<br><i>Social Influence barrier</i><br>Everyone I know uses tobacco: 33.1% |

1  
2  
3  
4  
5  
6  
7  
8  
9  
10  
11  
12  
13  
14  
15  
16  
17  
18  
19  
20  
21  
22  
23  
24  
25  
26  
27  
28  
29  
30  
31  
32  
33  
34  
35  
36  
37  
38  
39  
40  
41  
42  
43  
44  
45  
46  
47

| Author, Year, Country               | Study aims                                                                                                                                                          | Setting                                                    | Sample                       | Response rate | Type of survey (cross-sectional, etc) | Outcome measure (and info on survey instrument)                                                       | Barriers to quitting (type and prevalence)                                                                                                                                                                                                                                                                                                                                                                                                                                                                                                                                                                                                                                                                                                                                                                                                                                                                                                                |
|-------------------------------------|---------------------------------------------------------------------------------------------------------------------------------------------------------------------|------------------------------------------------------------|------------------------------|---------------|---------------------------------------|-------------------------------------------------------------------------------------------------------|-----------------------------------------------------------------------------------------------------------------------------------------------------------------------------------------------------------------------------------------------------------------------------------------------------------------------------------------------------------------------------------------------------------------------------------------------------------------------------------------------------------------------------------------------------------------------------------------------------------------------------------------------------------------------------------------------------------------------------------------------------------------------------------------------------------------------------------------------------------------------------------------------------------------------------------------------------------|
| <b>People with a mental illness</b> |                                                                                                                                                                     |                                                            |                              |               |                                       |                                                                                                       |                                                                                                                                                                                                                                                                                                                                                                                                                                                                                                                                                                                                                                                                                                                                                                                                                                                                                                                                                           |
| Asher et al 2003 (101)<br><br>USA   | Report the relative frequency of endorsement of the various barriers as a source of guidance for clinicians wanting to motivate alcoholic patients to quit smoking. | Urban inpatient state-subsidized substance abuse facility. | 96 alcohol dependent smokers | 73%           | Cross sectional survey                | 11 item True/False Barriers to Quitting Smoking in Substance Abuse Treatment (BQS-SAT) questionnaire. | <p>If I quit smoking, I'll feel tense and irritable: 87%</p> <p>If I quit smoking, I would feel anxious: 78%</p> <p>When I don't smoke, I feel restless, and I can't concentrate: 56%</p> <p>If I quit smoking, my urges to smoke will be so strong, I won't be able to stand it: 48%</p> <p>I don't have the willpower to quit smoking: 47%</p> <p>I need smoking to lift me up when I'm feeling down: 42%</p> <p>Quitting smoking during substance abuse treatment would make it harder to stay sober: 41%</p> <p>If I quit smoking, I would gain weight: 40%</p> <p>Smoking gives me a lift when I'm feeling tired: 28%</p> <p>If I quit smoking, I won't be able to sleep: 23%</p> <p>If I quit smoking, my urges to drink or use drugs will be so strong I won't be able to stand it: 13%</p> <p>Negative affect: 32%</p> <p>Habit: 28%</p> <p>Seeing others smoke or peer pressure: 22%.</p> <p>Being addicted to more than one substance: 5% .</p> |

| Author, Year, Country              | Study aims                                                                                                 | Setting                                  | Sample                                                                                                                                                                                        | Response rate | Type of survey (cross-sectional, etc) | Outcome measure (and info on survey instrument)                                        | Barriers to quitting (type and prevalence)                                                                                                                                                                                                                                                                                                                                                                                                                                       |
|------------------------------------|------------------------------------------------------------------------------------------------------------|------------------------------------------|-----------------------------------------------------------------------------------------------------------------------------------------------------------------------------------------------|---------------|---------------------------------------|----------------------------------------------------------------------------------------|----------------------------------------------------------------------------------------------------------------------------------------------------------------------------------------------------------------------------------------------------------------------------------------------------------------------------------------------------------------------------------------------------------------------------------------------------------------------------------|
|                                    |                                                                                                            |                                          |                                                                                                                                                                                               |               |                                       |                                                                                        | Compulsion and mental urges: 3%                                                                                                                                                                                                                                                                                                                                                                                                                                                  |
| Carosella et al 1999 (88).<br>USA. | Assess the barriers to and facilitators of quitting smoking in long term care inpatients.                  | Long term psychiatric care units.        | n = 92<br>98% male<br>Age: mean = 47.6<br>Diagnoses: substance abuse (60.9%); schizophrenia (55.4%); affective disorders (38%).                                                               | 77.7%         | Interviews.                           | Smoking status and history, demographic information, reasons for not quitting smoking. | Enjoyment: 47.2%<br>Habit : 36.1%<br>Boredom: 12.5%<br>Anxiety, nerves: 11.1%<br>Smoking does me good (e.g., relaxing, stimulating, stifles pain): 9.7%<br>Availability of cigarettes: 6.9%<br>Never had a reason/need to stop: 6.9%<br>I have emotional problems: 6.9%<br>Other stressors: 5.6%<br>Concentrating on other addictions: 4.2%<br>Smoking helps your appetite/digestion: 4.2%<br>I need some help to stop: 4.2%<br>Sociability of smoking: 2.7%<br>Don't know: 2.7% |
| Orleans et al 1993<br>USA          | Aimed to inform the design of nicotine addiction treatments tailored for patients with chemical dependency | Inpatient substance use treatment centre | n = 78<br>78% male<br>mean age = 36.6 (SD = 10.1)<br>78%: alcohol<br>9% drug problems including cocaine, heroin, marijuana and prescription medication<br>13% alcohol and other drug problems | Not reported  | Cross-sectional                       | Sociodemographic, smoking related characteristics, 9 item barriers survey.             | Missing or craving cigarettes: 68.4%<br>Being nervous, anxious or tense: 53.3%<br>Being around other smokers: 43.3%<br>Losing a pleasure: 39.4%<br>Coping with stress: 38.7%<br>Being afraid you'll fail: 27%<br>Gaining weight: 24.3%<br>Maintaining sobriety: 9.9%<br>Increased alcohol/drug use: 2.9%                                                                                                                                                                         |

1  
2  
3  
4  
5  
6  
7  
8  
9  
10  
11  
12  
13  
14  
15  
16  
17  
18  
19  
20  
21  
22  
23  
24  
25  
26  
27  
28  
29  
30  
31  
32  
33  
34  
35  
36  
37  
38  
39  
40  
41  
42  
43  
44  
45  
46  
47

| Author, Year, Country                 | Study aims                                                                                                                                       | Setting                                                                                                                                         | Sample                                                                                                                                                                                                                  | Response rate | Type of survey (cross-sectional, etc) | Outcome measure (and info on survey instrument)                                                                                                                                                                                                         | Barriers to quitting (type and prevalence)                                                                                                                                                                                                          |
|---------------------------------------|--------------------------------------------------------------------------------------------------------------------------------------------------|-------------------------------------------------------------------------------------------------------------------------------------------------|-------------------------------------------------------------------------------------------------------------------------------------------------------------------------------------------------------------------------|---------------|---------------------------------------|---------------------------------------------------------------------------------------------------------------------------------------------------------------------------------------------------------------------------------------------------------|-----------------------------------------------------------------------------------------------------------------------------------------------------------------------------------------------------------------------------------------------------|
| <b>Homeless groups</b>                |                                                                                                                                                  |                                                                                                                                                 |                                                                                                                                                                                                                         |               |                                       |                                                                                                                                                                                                                                                         |                                                                                                                                                                                                                                                     |
| Arnsten et al 2004 (106).<br><br>USA. | Evaluate predictors of readiness to quit and interest in cessation counselling in a homeless sample                                              | Homeless services at urban hospital                                                                                                             | n = 98<br>Age: mean = 44 years.<br>Median number of years homeless = 2.75<br>Predominantly white, unmarried, unemployed or disabled, males (proportions not provided).                                                  | Not reported. | Cross-sectional.                      | Smoking behaviour, reasons for quitting, readiness to quit, history of homelessness, alcohol and other drug history, psychiatric history, medical history, quit attempts, social support.                                                               | 21% believe the people closest to them would be very helpful in quitting smoking.<br><br>29% endorsed the item "People closest to you want you to quit very much".                                                                                  |
| Connor et al. 2002 (107).<br><br>USA. | Ascertain the prevalence of smoking, smoking cessation and how various factors associated with homelessness impact on readiness to quit smoking. | Emergency homeless services, residential drug treatment services, drop in centres for homeless in the city of Pittsburgh (9 homeless services). | n = 230<br>Male = 81%<br>Age: mean = 41.8, SD = 10.7.<br>Ethnicity: 54% African Americans; 40% white; 3% Hispanic; 3% other.<br>Homelessness: 46% living in transitional housing, 31% in shelter; street 20%; 3% living | >97%          | Cross-sectional.                      | Demographics, substance use history, housing status, Fagerstrom Test of Nicotine Dependence, Stage of Change, self-efficacy, barriers to cessation (as 5 potential barriers: cravings, other smokers, weight gain, habit, stress/mood), social support. | Cravings: 50%<br>Stress or mood swings: 44%<br>Being around others who smoke: 42%<br>Not receiving any support during quit attempt: 26%<br>Fear of weight gain: 20%<br>No specific treatments (pharmacological) could help them quit smoking: 31.6% |

| Author,<br>Year,<br>Country             | Study aims                                                                              | Setting                                                               | Sample                                                                                                                        | Response rate | Type of survey<br>(cross-sectional,<br>etc) | Outcome<br>measure (and<br>info on survey<br>instrument)                                                                                                         | Barriers to quitting (type and<br>prevalence)                                                                                                                                                                                                                                                                                                                                                                       |
|-----------------------------------------|-----------------------------------------------------------------------------------------|-----------------------------------------------------------------------|-------------------------------------------------------------------------------------------------------------------------------|---------------|---------------------------------------------|------------------------------------------------------------------------------------------------------------------------------------------------------------------|---------------------------------------------------------------------------------------------------------------------------------------------------------------------------------------------------------------------------------------------------------------------------------------------------------------------------------------------------------------------------------------------------------------------|
|                                         |                                                                                         |                                                                       | with<br>family/friends.                                                                                                       |               |                                             |                                                                                                                                                                  |                                                                                                                                                                                                                                                                                                                                                                                                                     |
| <b>Prisoner groups</b>                  |                                                                                         |                                                                       |                                                                                                                               |               |                                             |                                                                                                                                                                  |                                                                                                                                                                                                                                                                                                                                                                                                                     |
| Dickens et al<br>2005 (109).<br><br>UK. | To explore<br>psychiatric<br>inpatients<br>views of<br>smoking<br>cessation<br>options. | Forensic wards<br>of large<br>independent<br>psychiatric<br>hospital. | n = 34<br>57.8% male<br>Age: mean =<br>36.0, SD = 9.7<br>Ethnicity: not<br>reported.<br>88.9% legal<br>status of<br>detained. | 44.1%         | Cross-sectional.                            | Demographic<br>details, mental<br>health act status,<br>smoking<br>characteristics,<br>views on smoking<br>cessation and<br>rules on smoking<br>in the hospital. | Other patients smoking: 79.4%<br>The “smoky atmosphere” would make it<br>too difficult to stop smoking: 58.8%<br>Seeing members of staff smoking: 55.9%<br>Not enough encouragement from staff:<br>29.4%<br>Not enough information about giving up<br>smoking: 26.5%<br>“It’s just too difficult” to give up<br>smoking: 73.5%<br>Several smokers commented that<br>boredom was a factor in continuing to<br>smoke. |



Supplementary file 3. Summaries of the included qualitative studies by disadvantaged group (n = 54).

| Author, Year, Country               | Study aims                                                                                       | Setting                                                         | Sample                                                                                                                            | Method        | Interview schedule/discussion guide                                                                                                                                                        | Type of analysis                  | Barriers to quitting                                                                                                                                                                                                                                                                                                                                                                                                                                                                                                                                                         |
|-------------------------------------|--------------------------------------------------------------------------------------------------|-----------------------------------------------------------------|-----------------------------------------------------------------------------------------------------------------------------------|---------------|--------------------------------------------------------------------------------------------------------------------------------------------------------------------------------------------|-----------------------------------|------------------------------------------------------------------------------------------------------------------------------------------------------------------------------------------------------------------------------------------------------------------------------------------------------------------------------------------------------------------------------------------------------------------------------------------------------------------------------------------------------------------------------------------------------------------------------|
| <b>Low SES</b>                      |                                                                                                  |                                                                 |                                                                                                                                   |               |                                                                                                                                                                                            |                                   |                                                                                                                                                                                                                                                                                                                                                                                                                                                                                                                                                                              |
| Ahijevych 2003(49).<br><br>USA      | Investigate the beliefs and attitudes towards tobacco of current and former Appalachian smokers. | Non metropolitan Appalachian county.                            | n = 14<br>64% female<br>Age: mean = 33.7, SD = 8.7<br>Ethnicity: 100% white, non-Hispanic<br>High school education or less: 40.5% | Focus groups  | Roles of tobacco in life and community, factors helped or hindered previous quit attempts, community perceptions of tobacco use, and strategies for successful smoking cessation programs. | Content analysis.                 | Addiction to nicotine.<br>Cravings.<br>Smoking provides a rush.<br>Alleviating boredom.<br>Peers and family members who reinforced smoking.<br>Routine/ritual of smoking.<br>Social activities.<br>Associated behaviours: alcohol, caffeine, Weight gain.                                                                                                                                                                                                                                                                                                                    |
| Bancroft et al 2003 (50).<br><br>UK | Investigate barriers to quitting and accessing treatment in two disadvantaged areas of Scotland  | Two disadvantaged geographical areas in Scotland                | n = 100<br>50% female<br>Age: not reported<br>Ethnicity: not reported.<br>Housing tenure: 76% council housing                     | Interviews    | Smoking and quitting; future smoking, intentions to quit; habit and addiction.                                                                                                             | Thematic analysis.<br><br>NUDIST. | Addictive behaviour.<br>Habit.<br>Lack of alternatives.<br>Smoking is the only pleasurable activity to do.<br>Reward.<br>Deal with stress.<br>Alleviate boredom.<br>Alleviate stress from financial pressures.                                                                                                                                                                                                                                                                                                                                                               |
| Beech et al 2003 (51).<br><br>USA   | Investigate the cultural and social factors associated with African American low income smokers. | High schools, colleges, housing developments and trade schools. | n = 118<br>45% female<br>Age: between 18 and 35 years old.<br>Ethnicity: 100% African American.                                   | Focus groups. | Smoking initiation, smoking maintenance and cessation.                                                                                                                                     | Content analysis.                 | Equal numbers of participants reporting smoking managed their stress compared to those who reported smoking contributed to their stress.<br>Anxiety management.<br>Daily hassles and life events.<br>Energy and alertness.<br>Taking a break.<br>Boredom.<br>Managing certain medical conditions.<br>High levels of accessibility in communities.<br>Willpower and prayer were more highly valued as cessation methods than use of pharmacology or counselling.<br>High prevalence of smoking within social networks and communities: family, peers and the wider community. |

| Author, Year, Country               | Study aims                                                                                                                                                                                                             | Setting                                                                     | Sample                                                            | Method             | Interview schedule/discussion guide                                                                                                                        | Type of analysis                           | Barriers to quitting                                                                                                                                                                                                                                                                                                                                                                                                                                                                                                                                                                                                                                                                                                                                         |
|-------------------------------------|------------------------------------------------------------------------------------------------------------------------------------------------------------------------------------------------------------------------|-----------------------------------------------------------------------------|-------------------------------------------------------------------|--------------------|------------------------------------------------------------------------------------------------------------------------------------------------------------|--------------------------------------------|--------------------------------------------------------------------------------------------------------------------------------------------------------------------------------------------------------------------------------------------------------------------------------------------------------------------------------------------------------------------------------------------------------------------------------------------------------------------------------------------------------------------------------------------------------------------------------------------------------------------------------------------------------------------------------------------------------------------------------------------------------------|
| Bryant et al 2010 (52).<br><br>AUS  | Sought to describe the smoking behaviours and attitudes of disadvantaged Australian smokers attending SCSOs, including past experiences of quitting, preferences for quit support, and perceived barriers to quitting. | Five community welfare organisations located in New South Wales, Australia. | n = 32<br>69% female<br>Age: all participants aged over 16 years. | Focus groups.      | Current smoking behaviour, motivation to quit, past quit attempts, barriers to quitting and preferences for cessation support.                             | Thematic analysis.<br><br>Nvivo version 8. | Stress relief.<br>Calming, relaxing.<br>Alleviating boredom.<br>Coping mechanism.<br>A best friend.<br>Low self-efficacy – doubting ability to quit.<br>Viewing quitting as impossible.<br>Feeling ready and having willpower were integral to success.<br>Low knowledge of quit support.<br>Unsure how to correctly use NRT, belief NRT was ineffective, learning from others about the efficacy of NRT.<br>Knowledge of other pharmacotherapies was low.<br>Telephone quit lines usage also low.<br>Weight gain.<br>Limited perceived support from GPs and other health professionals.<br>High cost of NRT.<br>Repeated social and environmental exposure to smoking.<br>Norm within the community.<br>High prevalence of friends and family were smokers. |
| Copeland et al 2003 (53).<br><br>UK | To further examine the roles that smoking plays in the lives of the study group                                                                                                                                        | General practice in a deprived area of Edinburgh.                           | n = 51<br>100% female                                             | Open ended survey. | Open-ended questions regarding smoking characteristics, feelings and experiences regarding smoking, as well as measures of anxiety, depression and stress. | Content and category analysis.             | Lack of willpower.<br>Triggering event such as starting new job, marital problems, bereavement.<br>Nothing else to help cope.<br>Weight gain.<br>Social smoking.<br>Contact with other smokers.                                                                                                                                                                                                                                                                                                                                                                                                                                                                                                                                                              |
| Dunn et al 1998 (54)                | Explore attitudes and perceptions of smoking during pregnancy.                                                                                                                                                         | Neighbourhood centres and clinics in an urban area. .                       | n = 57.<br>100% female<br>Age: 77% aged 25 or younger             | Focus groups.      | Health concerns, sources of advice regarding pregnancy,                                                                                                    | Content analysis.                          | Internal factors:<br>Stress.<br>Boredom.<br>Addiction to nicotine.                                                                                                                                                                                                                                                                                                                                                                                                                                                                                                                                                                                                                                                                                           |

| Author, Year, Country              | Study aims                                                                                                      | Setting                                      | Sample                                                                                                                                                                                                    | Method        | Interview schedule/discussion guide                                                                                               | Type of analysis      | Barriers to quitting                                                                                                                                                                                                                                                                                                                                                                                                                                                                                                                                                                                                         |
|------------------------------------|-----------------------------------------------------------------------------------------------------------------|----------------------------------------------|-----------------------------------------------------------------------------------------------------------------------------------------------------------------------------------------------------------|---------------|-----------------------------------------------------------------------------------------------------------------------------------|-----------------------|------------------------------------------------------------------------------------------------------------------------------------------------------------------------------------------------------------------------------------------------------------------------------------------------------------------------------------------------------------------------------------------------------------------------------------------------------------------------------------------------------------------------------------------------------------------------------------------------------------------------------|
| USA                                | barriers to quitting, second hand smoke exposure, and preference for cessation programs among women of low SES. |                                              | Ethnicity: African Americans 24; Native Americans 23; white 10. High school education or less: 68%                                                                                                        |               | characteristics of useful programs, health effects of smoking, quitting, passive smoking exposure and attempts to avoid exposure. |                       | Withdrawal symptoms.<br>Strong cravings.<br>Weight gain.<br>Belief that smoking was not dangerous enough to warrant quitting.<br>Long term effects which participants do not consider.<br>External factors:<br>Being around friends and family members who smoked, including those who were not supportive of quit attempt.<br>Lack of control over exposure to smoke and influence of others.                                                                                                                                                                                                                               |
| Franco et al 2011 (55).<br><br>AUS | Increase knowledge on the barriers to smoking cessation and the acceptability of addressing smoking in SCSOs    | SCSO Illawarra region, NSW Australia         | n = 53<br>83% female                                                                                                                                                                                      | Focus groups. | Smoking and health, smoking cessation, support preferences, acceptability of addressing smoking in SCSO setting.                  | Notes based analysis. | Ritual.<br>Structures the day.<br>Reward after daily chores.<br>Something to do.<br>Stress management.<br>Concerns about the effectiveness of NRT.<br>Cost of NRT and other treatments too high.<br>Need more support to quit.                                                                                                                                                                                                                                                                                                                                                                                               |
| Lacey et al 1993 (93).<br><br>USA. | Increase understanding of the role of smoking and the challenges faced when attempting to quit.                 | Residents of public housing in Chicago, USA. | n = 6 – 8 participants per focus group (8 focus groups in total).<br>100% female.<br>Ethnicity: 100% African American.<br>42% not completed high school<br>100% had average yearly income < \$13,000 USD. | Focus groups. | Day to day activities, life stressors, community and living conditions,                                                           | Content analysis.     | Social isolation.<br>Lack of support.<br>Racially and economically segregated areas.<br>Fear limited outings to necessary activities.<br>Limited social networks outside of immediate family.<br>Stress management.<br>Substandard, unclean housing.<br>Few opportunities for recreation or employment.<br>Violence and crime.<br>Substance use.<br>Sense of control.<br>One of few attainable pleasures.<br>Legal and harmless for relatively small investment.<br>Perceived alternatives are drugs, alcohol abuse or losing control.<br>Low perceived harm.<br>Fatalistic beliefs/rationalisations/self-exempting beliefs. |

| Author, Year, Country               | Study aims                                                                                                                                                                                                                   | Setting                                                                              | Sample                                                                                                                                                                        | Method                      | Interview schedule/discussion guide                                    | Type of analysis                                                  | Barriers to quitting                                                                                                                                                                                                                                                                                                                                                                                                                                                                                                                                     |
|-------------------------------------|------------------------------------------------------------------------------------------------------------------------------------------------------------------------------------------------------------------------------|--------------------------------------------------------------------------------------|-------------------------------------------------------------------------------------------------------------------------------------------------------------------------------|-----------------------------|------------------------------------------------------------------------|-------------------------------------------------------------------|----------------------------------------------------------------------------------------------------------------------------------------------------------------------------------------------------------------------------------------------------------------------------------------------------------------------------------------------------------------------------------------------------------------------------------------------------------------------------------------------------------------------------------------------------------|
|                                     |                                                                                                                                                                                                                              |                                                                                      |                                                                                                                                                                               |                             |                                                                        |                                                                   | Other physical illness and disease that took priority – COPD, heart disease, kidney disease.<br>Belief that smoking is normal.<br>Belief that most adults smoke.<br>High prevalence in social network.<br>Hard to avoid smoking.<br>Belief that the only way to quit smoking was to do it cold turkey.<br>Low knowledge regarding how to quit and methods/help available.<br>Absence of specific constructive assistance.<br>Being self-reliant preferred over being dependent on help from someone.<br>Smoking cessation support not seen as effective. |
| Moffatt et al 2004 (57).<br><br>AUS | Aim to gain better understanding of the barriers to quitting in blue collar workers                                                                                                                                          | Two antenatal clinics in Brisbane, QLD servicing predominantly low SES participants. | n = 25<br>100% male<br>Age: between 20 and 53 years old                                                                                                                       | Semi-structured interviews. | Questions developed from literature review and pilot study.            | Constant comparative method – conceptual analysis.<br><br>NUDIST. | Lack of control over smoking.<br>Long positive association with cigarettes – cool, sophisticated.<br>Lack of support to quit.<br>Withdrawal - negative feelings such as anger/irritability.<br>Peer pressure.<br>Relaxation.<br>Social contexts.<br>Habit – daily routine.                                                                                                                                                                                                                                                                               |
| Nichter et al 2007 (58).<br><br>USA | To uncover the factors that facilitate smoking during pregnancy and those that facilitate quitting; investigate the use of harm reduction practices used by pregnant women and the effects of social networks on smoking and | Large urban city.                                                                    | n = 53<br>100% female<br>Age: mean = 25, ranged from 18 – 43 years.<br>Ethnicity:<br>Anglo-American 62%;<br>Mexican American 21%;<br>African American 11%,<br>multiethnic 6%. | Semi-structured interviews  | Interview questions developed from pilot material with key informants. | ATLAS ti 5.0 software.                                            | Low social support.<br>Living in more than one residence during pregnancy.<br>Not being head of household/able to make decisions regarding smoking policy and house.<br>No stable employment.<br>No family/peer support.<br>Smoking helped women manage anger, frustration, control and autonomy.<br>Coping strategy.<br>History of depression.<br>Smoking seen as lesser evil compared to alcohol or other drugs.<br>Less clear about direct outcomes for baby.<br>Rationalisations “defence mechanisms/downplaying                                     |

| Author, Year, Country                     | Study aims                                                                                                                              | Setting                                                                  | Sample                                                | Method                              | Interview schedule/discussion guide                                                                               | Type of analysis                        | Barriers to quitting                                                                                                                                                                                                                                                                                                                                                                                                                                                          |
|-------------------------------------------|-----------------------------------------------------------------------------------------------------------------------------------------|--------------------------------------------------------------------------|-------------------------------------------------------|-------------------------------------|-------------------------------------------------------------------------------------------------------------------|-----------------------------------------|-------------------------------------------------------------------------------------------------------------------------------------------------------------------------------------------------------------------------------------------------------------------------------------------------------------------------------------------------------------------------------------------------------------------------------------------------------------------------------|
|                                           | cessation.                                                                                                                              |                                                                          | High school education or less: 74%<br>Unemployed: 60% |                                     |                                                                                                                   |                                         | medical risks/prioritising less stress over smoking damage.<br>No helpful guidance from health professionals.                                                                                                                                                                                                                                                                                                                                                                 |
| Paul et al 2010 (29).<br><br>AUS          | Examine the experience of the social context of smoking and whether this experience differed by sociodemographic characteristics        | Local community facilities in high and low SEIFA suburbs in Sydney, Aus. | n = 4 – 8 participants per group (8 groups in total). | Focus groups.                       | Smoking behaviour and history; current and future smoking environments; environmental factors related to smoking. | Thematic analysis.                      | Nostalgia for smoking that was once cool and sophisticated.<br>Weight control.<br>Not noticing any decrease in the smoking prevalence in their community over time.<br>Social/peer groups predominantly made up of smokers.<br>Social activity.<br>High perceived acceptability of smoking.<br>Work environment being more conducive to smoking.<br>Lack of smoking restriction at workplace.<br>Acceptability of smoking in open air environments in low SEP neighbourhoods. |
| Peretti-Watel et al 2009 (59).<br><br>FRA | To increase understanding of low socioeconomic status and smoking through investigating smoking motives.                                | South –east of France – social work centres and participants homes.      | n = 31                                                | In depth semi-structured interviews | Brief topic guide mentioned but not presented.                                                                    | Based on principles of grounded theory. | Addiction.<br>Pleasure and happiness.<br>Satisfied essential needs.<br>Relieves stress.<br>Fills void in everyday life – nothing else to do.<br>Only leisure activity they can afford.<br>Combat loneliness.<br>Manage other addictions.<br>Stressful life events such as break up of relationship or loss of job.                                                                                                                                                            |
| Roddy et al 2006 (61).<br><br>UK          | Determine level of awareness of stop smoking services in deprived area and identify specific barriers and motivators to improve access. | Most deprived districts in Greater Nottingham.                           | n = 39                                                | Focus groups.                       | Smoking behaviour, cessation experiences, knowledge and perceptions of existing services.                         | NUD*IST 6 software.                     | Lack of knowledge of services.<br>Misconceptions about attitudes within services.<br>Being judged by health professionals.<br>Feeling they would need intensive support to quit.<br>NRT was expensive and ineffective (many contraindications).<br>Bupropion was negatively associated with adverse events reported in media.<br>Stress.<br>Rationalisations.<br>Failed quit attempts in the past.                                                                            |

| Author, Year, Country               | Study aims                                                                                             | Setting                                                                                                    | Sample                                                                 | Method                     | Interview schedule/discussion guide                                                                                                         | Type of analysis   | Barriers to quitting                                                                                                                                                                                                                                                                                                                                                                                                                                                                                                                                                                                                                                                                                                                                                                                                                                                                                                                                                                                                                                                                                                                                                                                                                                                                    |
|-------------------------------------|--------------------------------------------------------------------------------------------------------|------------------------------------------------------------------------------------------------------------|------------------------------------------------------------------------|----------------------------|---------------------------------------------------------------------------------------------------------------------------------------------|--------------------|-----------------------------------------------------------------------------------------------------------------------------------------------------------------------------------------------------------------------------------------------------------------------------------------------------------------------------------------------------------------------------------------------------------------------------------------------------------------------------------------------------------------------------------------------------------------------------------------------------------------------------------------------------------------------------------------------------------------------------------------------------------------------------------------------------------------------------------------------------------------------------------------------------------------------------------------------------------------------------------------------------------------------------------------------------------------------------------------------------------------------------------------------------------------------------------------------------------------------------------------------------------------------------------------|
| Stead et al 2001 (62).<br><br>UK    | To investigate how smoking is fostered in areas that experience multiple forms of deprivation          | Housing estates within 8 communities in Glasgow having DEPCAT scores of 7 (highest scores of deprivation). | n = 53<br>Sample selected according to age, gender and smoking status. | Focus groups               | Smoking characteristics, smoking history, leisure activities, work and unemployment, cessation history, experiences of the local community. | Thematic analysis. | <p>Coping mechanism – dealing with stress directly related to living in a deprived community.</p> <p>Stressors include: limited income, caring for children, poor local infrastructure, high levels of crime and drug use, limited opportunities for rest and respite from community.</p> <p>High accessibility of cigarettes (legal, illegal and informal sources).</p> <p>Socialising.</p> <p>Main pleasure (cheap and easily accessible).</p> <p>Smoking alleviated anxiety and nervousness.</p> <p>Coping with frustration and demotivation of widespread unemployment.</p> <p>Normative influence of being surrounded by smoking.</p> <p>Accepted smoking as inevitable and preferable to other drug use.</p> <p>Deprived communities experienced feeling cut off from other communities (that were more advantaged) thus weren't exposed to other norms.</p> <p>Belonging and identity.</p> <p>Smoking compensates exclusion and binds communities together.</p> <p>Deepening financial hardship.</p> <p>Fears of not being able to cope without cigarettes.</p> <p>Limited awareness of help available.</p> <p>Lack of trust regarding efficacy of medications and cynicism about health professionals financially exploiting smokers.</p> <p>Little support from community.</p> |
| Stewart et al 1996 (63).<br><br>CAN | Examine the factors associated with barriers and supports to smoking cessation in disadvantaged women. | Atlantic region, Canada.                                                                                   | n = 386<br>100% female                                                 | Semi-structured interviews | Interview guides were used but not described.                                                                                               | Content analysis.  | <p>Linked with poverty, isolation, and caregiving.</p> <p>Coping mechanism.</p> <p>Associated fear, anger and anxiety.</p> <p>Reward.</p> <p>Pleasure.</p> <p>Addiction.</p> <p>Short and long term goals – struggle for 'survival'; therefore long term benefits of quitting had little impact.</p>                                                                                                                                                                                                                                                                                                                                                                                                                                                                                                                                                                                                                                                                                                                                                                                                                                                                                                                                                                                    |

| Author, Year, Country                   | Study aims                                                                                         | Setting                                                                                    | Sample                                                                        | Method                      | Interview schedule/discussion guide                                                                                                                                                                                | Type of analysis              | Barriers to quitting                                                                                                                                                                                                                                                                                                                                                                                                                                                                                                                                                                      |
|-----------------------------------------|----------------------------------------------------------------------------------------------------|--------------------------------------------------------------------------------------------|-------------------------------------------------------------------------------|-----------------------------|--------------------------------------------------------------------------------------------------------------------------------------------------------------------------------------------------------------------|-------------------------------|-------------------------------------------------------------------------------------------------------------------------------------------------------------------------------------------------------------------------------------------------------------------------------------------------------------------------------------------------------------------------------------------------------------------------------------------------------------------------------------------------------------------------------------------------------------------------------------------|
|                                         |                                                                                                    |                                                                                            |                                                                               |                             |                                                                                                                                                                                                                    |                               | Not using traditional cessation support services – negative reactions from those that had.<br>Personal determination and willpower were integral to success.<br>Cessation aids viewed as ineffective or harmful.<br>Believed that poverty, abuse and alcoholism more damaging to society – antagonistic towards tobacco control measures.                                                                                                                                                                                                                                                 |
| Stewart et al 1996 (64).<br><br>CAN     | Identify social-psychological factors associated with smoking cessation among disadvantaged women. | Atlantic region of Canada<br><br>Research carried out in sites accessible to participants. | n = 126<br>100% female                                                        | Focus groups and interviews | Reasons for smoking and continuing to smoke, impact of anti-smoking media messages, opinions and experiences regarding smoking cessation, strategies, services and support that would help stop or reduce smoking. | Content analysis.             | Weight gain.<br>Low expectation of support from health professionals and health agencies – lack of confidence in GPs and nurses.<br>Rarely contacted national/peak bodies like Lung association or Cancer Society.<br>Geographical isolation, lack of awareness of role and scepticism.<br>Lack of social support – partners, immediate family, friends and acquaintances.                                                                                                                                                                                                                |
| Stewart et al 2011 (65).<br><br>Canada. | Identify the needs and preference of female smokers from low socioeconomic background ds.          | Three large urban cities in Canada.                                                        | n = 64<br>100% female<br>Age: mean = 37<br>High school education or less: 68% | Focus groups.               | Smoking characteristics, cessation attempts and experiences, preferences for support to quit and resources.                                                                                                        | Thematic analysis.<br>QSR N6. | Limited employment opportunities.<br>Reliance on welfare and benefit payments.<br>Low socioeconomic status – poverty, low education, unemployment and the stress caused by these factors.<br>Lack of affordable childcare.<br>Management of emotions and stress – anger, upset, anxiety.<br>Coping mechanism.<br>One of few pleasures available.<br>Relaxation.<br>Reward.<br>Boredom, lack of access to recreational activities.<br>Smoking linked to feelings of loneliness and hopelessness regarding poverty.<br>Smoking as habit – linked to other behaviours – drinking coffee etc. |
| Stillman et                             | Increase knowledge of                                                                              | Employment and training and                                                                | n = 28                                                                        | Focus groups                | Social norms and smoking, how                                                                                                                                                                                      | Atlas.ti v 3. software.       | Smoking seen as normal, very common and not problematic.                                                                                                                                                                                                                                                                                                                                                                                                                                                                                                                                  |

| Author, Year, Country     | Study aims                                                                                                   | Setting                                                                                                                                                                | Sample                                                        | Method                                             | Interview schedule/discussion guide                                                                                                                   | Type of analysis    | Barriers to quitting                                                                                                                                                                                                                                                                                                                                                                                                                                                                                                                                                                                                                                                                                                                                                                                                                                                                                                                                                                                                                                    |
|---------------------------|--------------------------------------------------------------------------------------------------------------|------------------------------------------------------------------------------------------------------------------------------------------------------------------------|---------------------------------------------------------------|----------------------------------------------------|-------------------------------------------------------------------------------------------------------------------------------------------------------|---------------------|---------------------------------------------------------------------------------------------------------------------------------------------------------------------------------------------------------------------------------------------------------------------------------------------------------------------------------------------------------------------------------------------------------------------------------------------------------------------------------------------------------------------------------------------------------------------------------------------------------------------------------------------------------------------------------------------------------------------------------------------------------------------------------------------------------------------------------------------------------------------------------------------------------------------------------------------------------------------------------------------------------------------------------------------------------|
| al 2007 (66).<br>USA.     | environmental factors that facilitate or prevent young AA from smoking cessation.                            | education programs – inner city.                                                                                                                                       |                                                               |                                                    | tobacco was sourced, socialisation and smoking and smoking restrictions and advertising.                                                              |                     | Faced few restrictions regarding smoking. “Loosies” (single cigarettes) were easily accessible.                                                                                                                                                                                                                                                                                                                                                                                                                                                                                                                                                                                                                                                                                                                                                                                                                                                                                                                                                         |
| Tod 2003 (67).<br>UK      | Explore the reasons why pregnant women do not quit and are less likely to access smoking cessation services. | South Yorkshire Coalfields (SYC) – deprived area with high prevalence of smoking. Pregnant women known to maternity services within this area. Approached by midwives. | n = 11<br>100% female<br>Age: ranged from 19 to 38 years old. | Semi-structured interviews via telephone.          | Smoking history; obstetric history; factors influencing access to smoking cessation services; knowledge and beliefs; preferences for future services. | Framework analysis. | Addiction.<br>Only cutting down for baby; plan to resume after birth.<br>Enjoyment.<br>Belief that willpower is essential for success.<br>Cutting down but missing that extra strength to finally quit.<br>Pressures and stresses of life.<br>Lack of willpower linked to self-fulfilling prophecy; relapse was viewed as inevitable.<br>Smoking during pregnancy safest, and healthiest, and preferred course of action.<br>Housework; childcare, financial anxieties and relationships.<br>Protecting mental health.<br>Familiar and necessary tool to cope.<br>Smoking controlling appetite for weight concerns and also to control hunger.<br>Food was sacrificed in order to afford cigarettes.<br>Partners’ smoking affected motivation to quit.<br>Being around people who were smoking.<br>Timing of smoking cessation advice coinciding with tests for babies’ health.<br>Judgemental attitudes from service providers.<br>Lack of childcare options.<br>Minimizing risk of smoking.<br>Participants own experience discredited health advice. |
| Tsourtos et al 2008 (68). | Understand the barriers to quitting smoking, especially in relation to stress, in order to                   | The most disadvantaged are (local government area) in metropolitan Adelaide.                                                                                           | n = 29<br>48% female.                                         | Focus groups (2) and in depth telephone interviews | Barriers to quitting smoking (focus on stress), reasons for quitting, stress and quit attempts.                                                       | Not reported.       | Stressful environments including: financial stress, child rearing, family issues, employment disadvantage, increased morbidity and mortality within community (including smoking related illness), and difficulties in the workplace.<br>NRT too expensive to maintain.                                                                                                                                                                                                                                                                                                                                                                                                                                                                                                                                                                                                                                                                                                                                                                                 |



1  
2  
3  
4  
5  
6  
7  
8  
9  
10  
11  
12  
13  
14  
15  
16  
17  
18  
19  
20  
21  
22  
23  
24  
25  
26  
27  
28  
29  
30  
31  
32  
33  
34  
35  
36  
37  
38  
39  
40  
41  
42  
43  
44  
45  
46  
47

| Author, Year, Country                | Study aims                                                                                                     | Setting                                                                       | Sample                                                                                               | Method                      | Interview schedule/discussion guide                                                                                                                          | Type of analysis                  | Barriers to quitting                                                                                                                                                                                                                                                                                                                                                                                                                                                                                                   |
|--------------------------------------|----------------------------------------------------------------------------------------------------------------|-------------------------------------------------------------------------------|------------------------------------------------------------------------------------------------------|-----------------------------|--------------------------------------------------------------------------------------------------------------------------------------------------------------|-----------------------------------|------------------------------------------------------------------------------------------------------------------------------------------------------------------------------------------------------------------------------------------------------------------------------------------------------------------------------------------------------------------------------------------------------------------------------------------------------------------------------------------------------------------------|
| AUS                                  | understand the differences in cessation rates between the groups.                                              |                                                                               |                                                                                                      | (11).                       |                                                                                                                                                              |                                   | Financial stress.<br>Stress that arises from childrearing and women having a smoke to get 'time out'.<br>Partner smoking.<br>Increased morbidity and mortality in community, including due to smoking related illness.<br>Habit of smoking; ritualised behaviour.<br>Lack of control.<br>Addiction.<br>Cravings.<br>Boredom.<br>Smoking to alleviate stress.<br>Some respondents held the belief that it was not tobacco/cigarettes themselves that provided stress relief, but the chance to relax.                   |
| White & Baird 2013 (71)<br><br>UK    | Explore perspectives of former miners in disadvantaged former coal mining communities on smoking and cessation | Former coal mining towns and villages in Bolsover district, North Derbyshire. | n = 16<br>All participants white, male and British.<br>Aged between 45 and 68.<br>All former miners. | Interviews                  | Perspectives on smoking, stopping smoking and stop smoking services.                                                                                         | Content analysis                  | Attributing health issues to coal dust exposure rather than smoking.<br>Comparing the risks of coal mining to the risks of smoking.<br>Participants reported being able to stop smoking at will with minimal difficulty and need for support, despite all previous attempts being unsuccessful.                                                                                                                                                                                                                        |
| Wiltshire et al 2003 (69).<br><br>UK | Examine participants' views on quitting smoking and smoking and how that may be affected by their lives.       | Two health centres in two areas of deprivation in Scotland.                   | n = 100<br>50% male<br>Housing: 76% council/housing association                                      | Semi-structured interviews. | Daily consumption patterns, reasons for smoking, wider community environment, experiences of quitting and changes in smoking status, future quit intentions. | Thematic analysis.<br><br>NUD*ST. | Stress Management.<br>Coping mechanism.<br>Living, socializing and working with other smokers.<br>Smoking 'deeply embedded' in their lives.<br>Smoking was normalized and routine contact with other smokers made quitting even more difficult.<br>Only way to quit is remove yourself completely from your environment.<br>Addiction to nicotine.<br>Cravings.<br>Withdrawal symptoms and their impact on family/friends.<br>Stressful life circumstances.<br>Belief that NRT not up to task of replacing cigarettes. |

| Author, Year, Country               | Study aims                                                                                                                                                  | Setting                                                  | Sample                                                                                                                          | Method        | Interview schedule/discussion guide                                                                                                 | Type of analysis   | Barriers to quitting                                                                                                                                                                                                                                                                                                                                                                                                                                                                                                                                                                                            |
|-------------------------------------|-------------------------------------------------------------------------------------------------------------------------------------------------------------|----------------------------------------------------------|---------------------------------------------------------------------------------------------------------------------------------|---------------|-------------------------------------------------------------------------------------------------------------------------------------|--------------------|-----------------------------------------------------------------------------------------------------------------------------------------------------------------------------------------------------------------------------------------------------------------------------------------------------------------------------------------------------------------------------------------------------------------------------------------------------------------------------------------------------------------------------------------------------------------------------------------------------------------|
|                                     |                                                                                                                                                             |                                                          |                                                                                                                                 |               |                                                                                                                                     |                    | <p>Cost of NRT.</p> <p>Word of mouth regarding bad/unsuccessful attempts with NRT.</p> <p>Boredom and times of inactivity.</p> <p>Characteristics of living in a disadvantaged area - violence, crime.</p> <p>Willpower was essential in order to be able to quit smoking.</p>                                                                                                                                                                                                                                                                                                                                  |
| <b>Indigenous studies</b>           |                                                                                                                                                             |                                                          |                                                                                                                                 |               |                                                                                                                                     |                    |                                                                                                                                                                                                                                                                                                                                                                                                                                                                                                                                                                                                                 |
| Burgess et al 2007 (72).<br><br>USA | Explore the cultural factors associated with experience and perceptions regarding tobacco use, cessation and dependence treatments.                         | Minneapolis/St Paul metropolitan area.                   | n = 26 American Indian participants<br>30% female                                                                               | Focus groups. | Smoking, smoking cessation and tobacco dependence treatments.                                                                       | Content analysis.  | <p>Smoking as highly acceptable and widespread within community.</p> <p>Traditional ceremonial use of tobacco.</p> <p>Addiction.</p> <p>Cravings.</p> <p>Withdrawal symptoms.</p> <p>Stressful circumstances.</p> <p>Suspicion towards pharmacotherapy.</p> <p>Scepticism about benefits of pharmacotherapy and negative views of medical profession in general.</p> <p>For women, smoking was seen as way to care for self in face of multiple responsibilities.</p> <p>Women used to manage stress, negative emotions, deal with life demands including children, work and family.</p> <p>Weight control.</p> |
| Choi et al 2006 (73).<br><br>USA.   | Assess smoking behaviour, cessation, traditional tobacco use and attitudes towards a smoking cessation program in a sample of American Indian participants. | Health Centre based within an Indian Nations University. | n = 41 American Indian participants<br>63% female<br>Age: mean = 41 (SD = 12.3) ranged from 21-67<br>63% some college education | Focus groups. | 1. Tobacco use (including ceremonial and non-ceremonial)<br>2. Smoking and quitting.<br>3. Smoking cessation program "Second Wind". | Themes identified. | <p>Traditional or ceremonial use of tobacco.</p> <p>Use of tobacco important to maintain an 'Indian' identity.</p> <p>Relapse in social situations.</p> <p>Normative behaviour.</p> <p>Highly prevalent: everyone smokes.</p> <p>Stressful situations.</p> <p>Belief that quitting smoking "takes personal motivation and a person will not be able to quit unless he or she has determination and self-control and really wants to quit".</p> <p>Most had tried NRT – cost was a barrier to getting more NRT.</p> <p>Nightmares were attributed to bupropion and NRT.</p>                                      |

1  
2  
3  
4  
5  
6  
7  
8  
9  
10  
11  
12  
13  
14  
15  
16  
17  
18  
19  
20  
21  
22  
23  
24  
25  
26  
27  
28  
29  
30  
31  
32  
33  
34  
35  
36  
37  
38  
39  
40  
41  
42  
43  
44  
45  
46  
47

| Author, Year, Country              | Study aims                                                                    | Setting                                         | Sample                                                     | Method                                       | Interview schedule/discussion guide                                      | Type of analysis                           | Barriers to quitting                                                                                                                                                                                                                                                                                                                                                                                                                                                                                                                                                                                                                                                                                                                                                                                                                                                                                                                                                                                                                                                                                                                                                                                                                                                                                                                                                                                                                                                                                                                                                                                                                                                                                                                                                                                           |
|------------------------------------|-------------------------------------------------------------------------------|-------------------------------------------------|------------------------------------------------------------|----------------------------------------------|--------------------------------------------------------------------------|--------------------------------------------|----------------------------------------------------------------------------------------------------------------------------------------------------------------------------------------------------------------------------------------------------------------------------------------------------------------------------------------------------------------------------------------------------------------------------------------------------------------------------------------------------------------------------------------------------------------------------------------------------------------------------------------------------------------------------------------------------------------------------------------------------------------------------------------------------------------------------------------------------------------------------------------------------------------------------------------------------------------------------------------------------------------------------------------------------------------------------------------------------------------------------------------------------------------------------------------------------------------------------------------------------------------------------------------------------------------------------------------------------------------------------------------------------------------------------------------------------------------------------------------------------------------------------------------------------------------------------------------------------------------------------------------------------------------------------------------------------------------------------------------------------------------------------------------------------------------|
| Dawson et al 2012 (74).<br><br>AUS | Increase understanding of barriers within Aboriginal Health Worker workforce. | Metropolitan, rural and remote health services. | n = 34<br>Aboriginal Australian participants<br>44% female | Semi structured interviews and focus groups. | Factors related to relapse, not wanting to quit, challenges in quitting. | Content analysis.<br><br>NVivo 8 software. | <p>Largest barriers to NRT use were cost and accessibility.</p> <p>Stress, grief and loss – due to health concerns, excessive work demands, family issues, inequity in workplace, institutionalised racism and pervasiveness of social disadvantage.</p> <p>Chronic disease, burden of illness, premature deaths in community.</p> <p>Fear – of failure, feeling sick (withdrawal symptoms), weight gain, and losing a coping strategy.</p> <p>Smoking not being a problem – rationalizations as well as just the belief that it’s not a problem.</p> <p>Quitting not the greatest priority in their lives.</p> <p>Lack of knowledge about quit methods – unsure about the benefits of certain pharmacological methods.</p> <p>Lack of access to relevant quit smoking aids – culturally appropriate, cost.</p> <p>Nicotine addiction – biological addiction was rarely referenced.</p> <p>Social pressure to smoke – living and socialising with smokers.</p> <p>Situations where alcohol was consumed or with high number of other smokers.</p> <p>Quitting means exclusion from this network.</p> <p>Offence at not participating – maintaining connectedness.</p> <p>Lack of support/role models – few friends and family/community members who had quit successfully, intolerance of mood changes around when quitting.</p> <p>Pressure to quit from non-smokers – ‘picked on’, line between encouragement and beleaguering.</p> <p>Smoking common in the workplace – acceptable, organisational culture enabled smoking, create bond between clients and workers, challenge sin enforcing smoke free policies.</p> <p>Smoking was pervasive and acceptable within community, inability to avoid smoking – high prevalence impacted by historical role of tobacco, culturally and colonial influence.</p> |

| Author, Year, Country              | Study aims                                                                                                                | Setting                                         | Sample                                                   | Method                     | Interview schedule/discussion guide                                                                                                    | Type of analysis                  | Barriers to quitting                                                                                                                                                                                                                                                                                                                                                                                                                                                                                                                                                                                                                                                                                                                                                                                                                                                                                                                                                                                                                                                                                                                                                                                                                                                                                                                  |
|------------------------------------|---------------------------------------------------------------------------------------------------------------------------|-------------------------------------------------|----------------------------------------------------------|----------------------------|----------------------------------------------------------------------------------------------------------------------------------------|-----------------------------------|---------------------------------------------------------------------------------------------------------------------------------------------------------------------------------------------------------------------------------------------------------------------------------------------------------------------------------------------------------------------------------------------------------------------------------------------------------------------------------------------------------------------------------------------------------------------------------------------------------------------------------------------------------------------------------------------------------------------------------------------------------------------------------------------------------------------------------------------------------------------------------------------------------------------------------------------------------------------------------------------------------------------------------------------------------------------------------------------------------------------------------------------------------------------------------------------------------------------------------------------------------------------------------------------------------------------------------------|
|                                    |                                                                                                                           |                                                 |                                                          |                            |                                                                                                                                        |                                   | Smoking behaviours weren't questioned.<br>Lack of policies to promote smoke free environments, short term funding of tobacco programs, inadequate investment for organisations.                                                                                                                                                                                                                                                                                                                                                                                                                                                                                                                                                                                                                                                                                                                                                                                                                                                                                                                                                                                                                                                                                                                                                       |
| Dawson et al 2012 (75).<br><br>AUS | Explore the perceptions of Aboriginal Health Workers in relation to individual and contextual factors relating to smoking | Metropolitan, rural and remote health services. | n = 34<br>Aboriginal Australian participants<br>44% male | Semi-structured interviews | Current smoking and smoking history; reasons for continuing to smoke; typical weekday and weekend when smoking occurred; quit history. | Content analysis.<br><br>NVivo 8. | Stress: relationships and family issues; financial problems; community issues and work challenges.<br>Poor physical and mental health e.g. anxiety, depression, chronic pain.<br>Associative behaviours: getting in the car; drinking alcohol or caffeinated drinks, watching television, going outside.<br>Habit (tactile) – having something in their hands.<br>Boredom – 'time on one's hand'.<br>Awareness of 'nicotine addiction' only reported by 2 participants.<br>Chronic disease burden – heart disease, emphysema, diabetes, cancer.<br>Grief and loss – reduced life expectancy.<br>Caring for family – health support and advice; financial obligations and housing.<br>Breakdown in family dynamics: single parent families; isolation; stolen generation.<br>Socialisation and connection: social lubricant; belonging.<br>Debriefing opportunity – after stressor.<br>Co-worker, friend, family, client encouragement to smoke. Active and passive encouragement.<br>Demanding work, including out of hours.<br>Job insecurity and financial insecurity. Institutionalised racism.<br>Dispossession of land; collective grief and loss; prevalent racism; social disadvantage; poverty, homelessness; unemployment, chronic disease, drug abuse; gambling, violence, housing issues; imprisonment, lack of education. |
| Dennis et al 2012 (76).            | Qualitatively explore tobacco, alcohol and other                                                                          | Rural reservation in Midwestern state of USA.   | n = 49<br>American Indian                                | Focus groups.              | Not reported.                                                                                                                          | Thematic analysis.                | Lenient attitudes towards smoking.<br>Generational use (parents and grandparents to children).<br>Accessibility of cigarettes (easy access through friends)                                                                                                                                                                                                                                                                                                                                                                                                                                                                                                                                                                                                                                                                                                                                                                                                                                                                                                                                                                                                                                                                                                                                                                           |

| Author, Year, Country                         | Study aims                                                                                                                                              | Setting                                               | Sample                                                                 | Method                                                   | Interview schedule/discussion guide                                                                                                                           | Type of analysis                                               | Barriers to quitting                                                                                                                                                                                                                                                                                                                                                                                                                                                                                                                                                                                                                                                                                                                                                                                                                                                                                                                                                                                                                                        |
|-----------------------------------------------|---------------------------------------------------------------------------------------------------------------------------------------------------------|-------------------------------------------------------|------------------------------------------------------------------------|----------------------------------------------------------|---------------------------------------------------------------------------------------------------------------------------------------------------------------|----------------------------------------------------------------|-------------------------------------------------------------------------------------------------------------------------------------------------------------------------------------------------------------------------------------------------------------------------------------------------------------------------------------------------------------------------------------------------------------------------------------------------------------------------------------------------------------------------------------------------------------------------------------------------------------------------------------------------------------------------------------------------------------------------------------------------------------------------------------------------------------------------------------------------------------------------------------------------------------------------------------------------------------------------------------------------------------------------------------------------------------|
| USA                                           | drug use in a sample of American Indians living on a rural reservation.                                                                                 |                                                       | participants<br>61% female<br>Age: 18 – 54<br>(57.2%)                  |                                                          |                                                                                                                                                               |                                                                | and family; cheaper to purchase on reservation).<br>Smoking linked with other behaviours (gambling, alcohol use).<br>High prevalence of smoking in community.                                                                                                                                                                                                                                                                                                                                                                                                                                                                                                                                                                                                                                                                                                                                                                                                                                                                                               |
| Fernandez et al 2008 (77).<br><br>New Zealand | Investigate the perception of smoking cessation in Maori women                                                                                          | One local Maori organisation                          | n = 5 Maori participants<br>100% female                                | Focus group.                                             | Perceptions of smoking and quitting, triggers for smoking, quit smoking policies and initiatives from the government, and mass media campaigns and marketing. | Thematic analysis.                                             | Observing health professionals smoking.<br>Limited support from other smokers (feeling negatively judged by other smokers when trying to quit).<br>Maori women felt more comfortable accessing health care from a Maori provider rather than a mainstream service.<br>All participants stated they would never ring the National Quitline (trust, disclosing information and allowing someone to assist them who is not known were the reasons cited for this).<br>Asking a stranger for help deemed unacceptable.                                                                                                                                                                                                                                                                                                                                                                                                                                                                                                                                          |
| Fu et al 2007 (78).<br><br>USA                | Increase understanding of the experiences of smoking cessation in 4 different ethnic groups: American Indians, Hmong, Vietnamese and African Americans. | Seven community organizations in Minneapolis/St Paul. | n = 26 American Indian participants (6 focus groups).<br>44.4% female. | Focus groups conducted separately for each ethnic group. | Discussion guide: smoking, smoking cessation, and help with quitting.                                                                                         | Methods for analysing qualitative data.<br><br>Atlas.ti, v 5.0 | Counselling was associated with an unequal power relationship between a white counsellor who was going to shame the participants about their smoking behaviour.<br>Rationalisations: “it's not like I'm dying today”.<br>Cynicism about the medical profession, including beliefs that doctors are untrustworthy, driven by monetary gain, and hypocritical.<br>Negative experiences with particular doctors including doctors being confrontational, blaming and impersonal.<br>Most had low levels of knowledge about the functional benefits of pharmacotherapy.<br>Participants did not understand that pharmacotherapy could be used to help them with cravings and withdrawal symptoms.<br>Concerns about side effects (e.g., overestimation of risks of side effects compared to risks of smoking).<br>Cost of medications and lack of accessibility perceived as major barriers to their use.<br>Word of mouth was a powerful influence on decisions to use or not use pharmacotherapy.<br>American Indian smokers, in particular, associated pills |

| Author, Year, Country                  | Study aims                                                                                                            | Setting                                                                   | Sample                                                                                                                    | Method         | Interview schedule/discussion guide                                                                                                | Type of analysis                            | Barriers to quitting                                                                                                                                                                                                                                                                                                                                                                                                                                                                                                                                                                                                                                                                                                                                                                                                                                                                                                                                                                                                                                           |
|----------------------------------------|-----------------------------------------------------------------------------------------------------------------------|---------------------------------------------------------------------------|---------------------------------------------------------------------------------------------------------------------------|----------------|------------------------------------------------------------------------------------------------------------------------------------|---------------------------------------------|----------------------------------------------------------------------------------------------------------------------------------------------------------------------------------------------------------------------------------------------------------------------------------------------------------------------------------------------------------------------------------------------------------------------------------------------------------------------------------------------------------------------------------------------------------------------------------------------------------------------------------------------------------------------------------------------------------------------------------------------------------------------------------------------------------------------------------------------------------------------------------------------------------------------------------------------------------------------------------------------------------------------------------------------------------------|
|                                        |                                                                                                                       |                                                                           |                                                                                                                           |                |                                                                                                                                    |                                             | with Western medicine, and viewed them with scepticism.                                                                                                                                                                                                                                                                                                                                                                                                                                                                                                                                                                                                                                                                                                                                                                                                                                                                                                                                                                                                        |
| Gould et al, 2013<br><br>AUS           | Explore issues for pregnant ATSI women in terms of smoking and smoking in the household                               | Regional NSW, Australia<br>Aboriginal maternal and infant health service. | 18 Aboriginal and/or Torres Strait Islander peoples (83% female)<br>Mean age: 30.3 (SD = 11.70)<br>Age range: 17-53 years | 5 focus groups | Experiences of and attitudes towards smoking during pregnancy and cessation                                                        | Content analysis                            | Smoking usual in families.<br>Several smokers in one household, difficult to avoid being around smoke.<br>Smoking provides sense of social connection.<br>Isolation if attempting to quit.<br>Shared activity, and an anticipated part of mutual exchange (socialising).<br>Low levels of support from family and friends to quit.<br>Pressure to quit from family and friends.<br>Pregnancy specific barriers: offset diabetes or keep baby small.<br>Babies and individuals turned out "healthy".<br>Not receiving understanding from doctors (judgemental).<br>Stress and anxious situations.<br>Cravings and withdrawal symptoms.<br>Meal times and work breaks (habit).<br>Yarning and socialising.<br>Sporting events, watching TV, boredom, TV ads, drinking alcohol and smelling tobacco smoke.<br>Smoking cannabis.<br>Being around other smokers, after birth.<br>Quitting "too hard".<br>Negative views of NRT due to adverse effects, preference to quit unaided, didn't understand how NRT could help.<br>Hopelessness after trying many methods. |
| Gryczynski et al 2010 (81).<br><br>USA | Inform the development of a culturally appropriate smoking cessation program for American Indians by looking at their | Local community-based American Indian health service organization         | n = 35 American Indian participants.<br>51.4% female<br>Age: 45.7% between ages of 41 – 50.                               | Focus groups.  | Cultural and social factors associated with smoking; smoking cessation experiences; attitudes towards cessation aids and programs. | Variant of the thematic framework approach. | Values of self-reliance and pride that are intertwined with American Indian identity.<br>Enjoyment of smoking.<br>Addiction to nicotine (deeply entrenched learned behaviour).<br>Linked to very heavy smoking behaviours (waking up during the night to smoke).<br>Association between other behaviours and smoking (coffee, alcohol, sex, other drug use).                                                                                                                                                                                                                                                                                                                                                                                                                                                                                                                                                                                                                                                                                                   |

| Author, Year, Country            | Study aims                                                                             | Setting                                                                        | Sample                                                          | Method                      | Interview schedule/discussion guide                                                                                         | Type of analysis                                   | Barriers to quitting                                                                                                                                                                                                                                                                                                                                                                                                                                                                                                                                                                                                                                                                                                                                                                                                                                                     |
|----------------------------------|----------------------------------------------------------------------------------------|--------------------------------------------------------------------------------|-----------------------------------------------------------------|-----------------------------|-----------------------------------------------------------------------------------------------------------------------------|----------------------------------------------------|--------------------------------------------------------------------------------------------------------------------------------------------------------------------------------------------------------------------------------------------------------------------------------------------------------------------------------------------------------------------------------------------------------------------------------------------------------------------------------------------------------------------------------------------------------------------------------------------------------------------------------------------------------------------------------------------------------------------------------------------------------------------------------------------------------------------------------------------------------------------------|
|                                  | preference for smoking cessation and associated programs.                              |                                                                                |                                                                 |                             |                                                                                                                             |                                                    | Smoking as a form of stress relief (given the highly stressful nature of low socioeconomic status). Ubiquity of cigarette use in life, friends and family. While physicians were seen as a good source of smoking cessation help, it was noted that many AI do not have private health insurance. Also physicians were not seen for non-emergency care. Cost, incorrect use, ineffectiveness and negative side effects prevented use of NRT. High number of family friends also smokers.                                                                                                                                                                                                                                                                                                                                                                                 |
| Hodge et al 2006 (82).<br>USA.   | Investigate tobacco use, attitudes, knowledge and practices in American Indian sample. | Reservation sites.                                                             | n = 51<br>American Indian participants<br>56.9% female.         | Focus groups.               | History of tobacco use in tribal context, knowledge and attitudes regarding cigarette smoking.                              | Krueger's (1998) focus group analysis methodology. | Lenient attitudes towards smoking including: acceptance of smoking as a social norm; belief in autonomy and people's right to experiment with tobacco; and low numbers of household smoking bans. Cultural phenomenon of independence and non-interference. Reluctance to tell others what to do, or to move away from someone who begins to smoke. Low harm value assigned to smoking – in light of other day to day issues faced. Participants were aware of the risks but downplayed the seriousness of those risks. Enjoyment of smoking. Maintaining the ritual of smoking. Brand loyalty (several brands of tobacco that have AI names e.g. Seneca, Mohawk etc.). Ceremonial use of tobacco was an important cultural custom. Learning how to use tobacco in ceremonies as a young person was important. The loyalty to the tribe overrides tobacco's ill effects. |
| Johnston et al 2008 (83).<br>AUS | To gain a better understanding of the reasons why Indigenous Australians smoke.        | Health professional and community members from a coastal community in Northern | n = 25<br>Indigenous Australian community members<br>52% female | Semi-structured interviews. | Flexible interview schedule developed through literature review and discussions with service providers – details not given. | Thematic analysis.<br><br>Atlas-ti (Version 5).    | Social pressure to smoke – both implicit and explicit. Smoking is everywhere – smokers live or socialise with smokers. Tobacco as a normative substance in this community. Communal and collective activity. Tobacco used for reciprocal social exchange; ceremony and sharing.                                                                                                                                                                                                                                                                                                                                                                                                                                                                                                                                                                                          |

| Author, Year, Country               | Study aims                                                                                                                                                             | Setting                   | Sample                                                                           | Method        | Interview schedule/discussion guide                                                                                                                                                                                                          | Type of analysis   | Barriers to quitting                                                                                                                                                                                                                                                                                                                                                                                                                                                                                                                                                                                                                                                                                                                                                                                                                                                                                                                                                                                                                                                                                                                   |
|-------------------------------------|------------------------------------------------------------------------------------------------------------------------------------------------------------------------|---------------------------|----------------------------------------------------------------------------------|---------------|----------------------------------------------------------------------------------------------------------------------------------------------------------------------------------------------------------------------------------------------|--------------------|----------------------------------------------------------------------------------------------------------------------------------------------------------------------------------------------------------------------------------------------------------------------------------------------------------------------------------------------------------------------------------------------------------------------------------------------------------------------------------------------------------------------------------------------------------------------------------------------------------------------------------------------------------------------------------------------------------------------------------------------------------------------------------------------------------------------------------------------------------------------------------------------------------------------------------------------------------------------------------------------------------------------------------------------------------------------------------------------------------------------------------------|
|                                     |                                                                                                                                                                        | Territory.                |                                                                                  |               |                                                                                                                                                                                                                                              |                    | <p>Sharing was a very important part of Indigenous culture as a way to influence behaviour, relationships and social control.</p> <p>Refusing to share cigarettes may be seen as a betrayal of the kinship they share and as an offensive act.</p> <p>Not sharing cigarettes may lead to isolation, as the sharing of cigarettes contributes to a sense of belonging and social identity.</p> <p>Some participants were derided for their decision to quit (but others were supported).</p> <p>Some state that the only way they could quit smoking is to distance themselves from family and friends, an entirely unfeasible proposition.</p> <p>Sharing a cigarette gives opportunity for a 'yarn' – enjoyment.</p> <p>Other positive effects including feeling more alert, happy, good, more able to complete tasks, relief, and allowing a sense of control.</p> <p>Habit, addiction and hooked – nicotine dependence.</p> <p>Overcrowding in homes.</p> <p>Stress was most often mentioned in conjunction with smoking relapse, and more often by women than men.</p> <p>An outlet, a stress management, and to manage grief.</p> |
| Kaholokula et al, 2007 (84).<br>USA | Identify supports for and barriers to smoking cessation for this ethnic population., and to inform the development of a smoking cessation program for this population. | Northern rural community. | n = 52 Native Hawaiian participants.<br>48% male<br>Age: mean = 51.8 (SD = 12.4) | Focus groups. | Smoking cessation advice and experience; barriers and facilitators to cessation; preferences in smoking cessation programs; differences between males and females.<br><br>Ex-smokers were also asked about aids to quitting and preferences. | Thematic analysis. | <p>Social factors:<br/>presence of friends, family and co-workers who were smokers, nagging to quit smoking.</p> <p>Psychological factors:<br/>stress, negative emotions, lack of 'willpower', thinking about the need to smoke.</p> <p>Physical factors:<br/>physical experience on nicotine addiction and withdrawal, weight gain.</p> <p>Behavioural :<br/>habitual nature of smoking, smoking linked to other behaviours (alcohol, reading the paper).</p>                                                                                                                                                                                                                                                                                                                                                                                                                                                                                                                                                                                                                                                                         |



| Author, Year, Country               | Study aims                                                                                                                 | Setting                                                                                                    | Sample                                                                                                                                                                                 | Method                                            | Interview schedule/discussion guide                                                                                                             | Type of analysis  | Barriers to quitting                                                                                                                                                                                                                                                                                                                                                                                                                                                                                                                                                                                                                                                                                                                                                                                                                                                                                                                                                                                                                                                                                                                                                                                                                                                                                           |
|-------------------------------------|----------------------------------------------------------------------------------------------------------------------------|------------------------------------------------------------------------------------------------------------|----------------------------------------------------------------------------------------------------------------------------------------------------------------------------------------|---------------------------------------------------|-------------------------------------------------------------------------------------------------------------------------------------------------|-------------------|----------------------------------------------------------------------------------------------------------------------------------------------------------------------------------------------------------------------------------------------------------------------------------------------------------------------------------------------------------------------------------------------------------------------------------------------------------------------------------------------------------------------------------------------------------------------------------------------------------------------------------------------------------------------------------------------------------------------------------------------------------------------------------------------------------------------------------------------------------------------------------------------------------------------------------------------------------------------------------------------------------------------------------------------------------------------------------------------------------------------------------------------------------------------------------------------------------------------------------------------------------------------------------------------------------------|
| Passey et al 2011 (85).<br><br>AUS  | Explore the factors contributing to smoking initiation and the social context within which smoking behaviour occurs.       | Coastal, river region of NSW – Aboriginal Maternal and Infant Health Strategy antenatal teams.             | n = 36<br>Aboriginal Australian participants.<br>100% female<br>Age (of women interview n = 22): mean = 24.9, ranged from 17 to 41.<br>Education: Less than ten years of education 68% | 3 Focus groups and 22 semi-structured interviews. | Topic areas – social and environmental factors that maintained or encouraged smoking and smoking initiation.                                    | Content analysis. | Colonisation and introduction of tobacco:<br>Disruption to Aboriginal society including dispossession of traditional lands, removal of children, loss of traditional lifestyle and introduction of new substances.<br>The traditional and ceremonial limits that used to apply to smoking are no longer applicable.<br>Social networks and community norms:<br>Aboriginal community remains largely isolated.<br>Many aboriginal people have limited interaction with non-smokers.<br>High prevalence of smoking which allows the normalisation of smoking to occur.<br>Limited interaction with non-smokers also limits exposure to changing attitude towards smoking.<br>Disadvantaged lives:<br>High unemployment, associated poverty, affordable housing, overcrowding, relationship difficulties, loss of family members through death/removal of children, grief and loss, abuse, perceived racism and negative stereotypes –smoking helped manage and navigate their way through these factors.<br>Maintaining relationships and sharing:<br>Relationships may be given higher priority over individual needs.<br>Reciprocity – obligations to share time and resources including cigarettes – to give and to accept those given to you.<br>Sharing and having a yarn was an important social activity. |
| Patten et al, 2009 (86).<br><br>USA | Preferences and acceptability of different tobacco cessation strategies and the barriers and unmet needs of Alaskan Native | 3 remote villages on the coast of western Alaska (populations ranging from 750 to 1,000)<br>Most residents | n = 49 Alaskan Native participants<br>61% female<br>Age: mean = 14.6 (SD = 1.6).                                                                                                       | Focus groups.                                     | Motives for quitting, barriers to quitting, role of family members and others in quitting, preference for tobacco cessation methods, preference | Content analysis. | Cravings.<br>Use as a stress/anger management.<br>Use of traditional forms of tobacco.<br>Manages mood.<br>Relieves boredom.<br>High prevalence and acceptance of tobacco use in villages<br>Lack of encouragement by peers and other community                                                                                                                                                                                                                                                                                                                                                                                                                                                                                                                                                                                                                                                                                                                                                                                                                                                                                                                                                                                                                                                                |

| Author, Year, Country               | Study aims                                                                                                                                           | Setting                                         | Sample                                                                                                                           | Method                                | Interview schedule/discussion guide                                                                                                           | Type of analysis                            | Barriers to quitting                                                                                                                                                                                                                                                                                                                                                                                                                                                                                                      |
|-------------------------------------|------------------------------------------------------------------------------------------------------------------------------------------------------|-------------------------------------------------|----------------------------------------------------------------------------------------------------------------------------------|---------------------------------------|-----------------------------------------------------------------------------------------------------------------------------------------------|---------------------------------------------|---------------------------------------------------------------------------------------------------------------------------------------------------------------------------------------------------------------------------------------------------------------------------------------------------------------------------------------------------------------------------------------------------------------------------------------------------------------------------------------------------------------------------|
|                                     | adolescents who want to quit smoking.                                                                                                                | live subsistence lifestyles.                    |                                                                                                                                  |                                       | for study recruitment and retention methods.                                                                                                  |                                             | members to stop.<br>Lack of effective resources to help quit                                                                                                                                                                                                                                                                                                                                                                                                                                                              |
| Wood et al 2008 (87).<br><br>AUS    | The aim of this study was to explore the experience of tobacco smoking and cessation within a pregnant Aboriginal and Torres Strait Islander sample. | Perth (State capital), Western Australia.       | n = 40<br>Aboriginal women and 10<br>Aboriginal Health Workers<br>Age: ranged from 14 to 50 years, with most less than 30 years. | Focus groups and in-depth interviews. | A semi-structured discussion guide with open-ended questions was developed in consultation with the reference group.                          | Thematic analysis.<br><br>QSR N6<br>NUDIST. | Smoking as an accepted behaviour.<br>Stress management.<br>Low priority in terms of health.<br>Stress.<br>Difficult life circumstances.<br>Relaxation, chance to catch up with others.<br>Pregnancy acted as a barrier as it increased boredom/stress.<br>High levels of smoking amongst friends, family and wider community.<br>To quit you would have to avoid family and friends.<br>Knowledge about the specific risks to the foetus was low.<br>References to babies being healthy despite smoking during pregnancy. |
| <b>Mental illness</b>               |                                                                                                                                                      |                                                 |                                                                                                                                  |                                       |                                                                                                                                               |                                             |                                                                                                                                                                                                                                                                                                                                                                                                                                                                                                                           |
| Clancy et al, 2013 (102)<br><br>AUS | Explore experiences of smokers with self-reported depression                                                                                         | Large cluster randomized control study          | n = 16                                                                                                                           | Semi-structured interviews.           | Semi-structured interview<br>Attitude towards smoking, relationship between smoking and mental health, quitting process.                      | Thematic analysis.<br><br>nVivo 9.          | Low mood.<br>Sense of hopelessness.<br>Lack of control over one's life.<br>Lack of meaningful activities.                                                                                                                                                                                                                                                                                                                                                                                                                 |
| Davis et al 2010 (89).<br><br>USA   | Investigate how people with severe mental illness perceive risks from smoking/risks posed by smoking.                                                | Large urban psychosocial rehabilitation agency. | n = 31<br>54% female<br>Ethnicity:<br>54.8%<br>Caucasian;<br>35% African<br>American                                             | Semi-structured interviews.           | General health and healthy lifestyle questions, smoking status, smoking history, quit attempts and barriers to and facilitators of cessation. | Inductive data analysis.<br><br>Atlas-ti.   | Enjoyment of smoking – pleasurable activity/coping mechanism.<br>Maintain good mental health.<br>Stress management.<br>Worried that without stress management of smoking: relapse, rehospitalisation, suicidal thoughts or suicide were possible.<br>Allowed people to manage other addictions.<br>Not experiencing symptoms of smoking related illness currently.<br>Smoking certain brands, types or flavours of cigarettes                                                                                             |

| Author, Year, Country             | Study aims                                                                                                       | Setting                                             | Sample                                                                                                                                                 | Method                      | Interview schedule/discussion guide                                                                                                                                                           | Type of analysis                    | Barriers to quitting                                                                                                                                                                                                                                                                                                                                                                                                                                                                                                                                                                                                                                                                                                     |
|-----------------------------------|------------------------------------------------------------------------------------------------------------------|-----------------------------------------------------|--------------------------------------------------------------------------------------------------------------------------------------------------------|-----------------------------|-----------------------------------------------------------------------------------------------------------------------------------------------------------------------------------------------|-------------------------------------|--------------------------------------------------------------------------------------------------------------------------------------------------------------------------------------------------------------------------------------------------------------------------------------------------------------------------------------------------------------------------------------------------------------------------------------------------------------------------------------------------------------------------------------------------------------------------------------------------------------------------------------------------------------------------------------------------------------------------|
|                                   |                                                                                                                  |                                                     |                                                                                                                                                        |                             |                                                                                                                                                                                               |                                     | because they are less likely to cause cancer.<br>Extreme trauma and negative life experiences act as a protective factor for smoking related illness – “I’ve made it through life this far, I don’t think I’ll get sick from smoking too” belief.<br>Examples of friends and family who are/were smokers and have never been ill.<br>Examples of friends/family who are not smokers who are still unhealthy.<br>Friends and family socialising and smoking at the same time.                                                                                                                                                                                                                                             |
| Howard et al 2012 (91).<br><br>UK | Investigate the specific barriers to smoking cessation faced by pregnant smokers.                                | Maternity and perinatal psychiatry services.        | n = 27<br>100% female<br>Age: mean = 29 (SD = 1.1), ranged from 17 – 41.<br>Ethnicity: 13 White; 4 Black African; 6 Black Caribbean and 4 Mixed/Other. | Semi-structured interviews. | Not reported.                                                                                                                                                                                 | Framework analysis.                 | Smoking used as a way of losing weight (for participants diagnosed with SMI and eating disorder).<br>Maintain good mental health.<br>Only occurring during manic/depressive cycles.<br>Fear that attempts to quit would increase symptoms of mental illness.<br>Prioritisation of mental health over smoking cessation by health professionals.<br>Social environment – family, partner and social network of peers – high prevalence of smoking and lack of support.<br>Accessibility of cigarettes.<br>Psychological and physical addiction to cigarettes.<br>Quit smoking services and resources: judgemental, lack of proactive follow up, lack of continuity of care, prioritisation of mental health over smoking. |
| Kerr et al 2013 (92).<br><br>UK   | To determine the principle barriers and facilitators to smoking cessation for people with mental health problems | Recruited from three Health Boards in Scotland, UK. | n = 27 participants with mental health problems<br>41% male<br>Age: median = 49, ranged from 30 to 60.<br>Diagnosis: 41% Schizophrenia/                | Semi-structured interviews. | Smoking history; positive and negative aspects of smoking perceived barriers and facilitators to smoking cessation; times when smoke more or less; impact of mental health problem on smoking | Framework analysis.<br><br>NVivo 8. | Socialising and habits of family and friends<br>Smoking as a calming agent; dealing with general stressors and anxiety linked to mental health problems.<br>Stopping smoking would mean loss of coping mechanism/support.<br>Maintain good mental health.<br>Deterioration in mental health increases need for smoking.<br>Stimulant effect helped overcome side effects from medications, in particular antipsychotics.<br>Habit and addiction (small numbers).                                                                                                                                                                                                                                                         |

| Author, Year, Country | Study aims                                                                                                                                                                                                                  | Setting                 | Sample                                                                                                                                                                                                        | Method                      | Interview schedule/discussion guide                                                                                                                                      | Type of analysis   | Barriers to quitting                                                                                                                                                                                                                                                                                                                                                                                                                                                                                                                                                                                                                                                                                                                                                                                                                                                                                                                                                                                                                                                                                                                                                                          |
|-----------------------|-----------------------------------------------------------------------------------------------------------------------------------------------------------------------------------------------------------------------------|-------------------------|---------------------------------------------------------------------------------------------------------------------------------------------------------------------------------------------------------------|-----------------------------|--------------------------------------------------------------------------------------------------------------------------------------------------------------------------|--------------------|-----------------------------------------------------------------------------------------------------------------------------------------------------------------------------------------------------------------------------------------------------------------------------------------------------------------------------------------------------------------------------------------------------------------------------------------------------------------------------------------------------------------------------------------------------------------------------------------------------------------------------------------------------------------------------------------------------------------------------------------------------------------------------------------------------------------------------------------------------------------------------------------------------------------------------------------------------------------------------------------------------------------------------------------------------------------------------------------------------------------------------------------------------------------------------------------------|
|                       |                                                                                                                                                                                                                             |                         | delusional disorder; 30% Affective disorder; 22% Schizoaffective disorder; 4% neurotic disorder and 4% neurotic-affective disorder.                                                                           |                             | and cessation                                                                                                                                                            |                    | Enjoyment.<br>Lacking motivation and confidence to give up.<br>Lack of support from health professionals – uncommon to raise issue of smoking, offer encouragement support to stop.<br>Some reports of professionals actively discouraging cessation attempts.                                                                                                                                                                                                                                                                                                                                                                                                                                                                                                                                                                                                                                                                                                                                                                                                                                                                                                                                |
| Lawn et al 2002 (93). | Describe the experience of mental health clients as they relate to smoking behaviour, the relationship of smoking behaviour to the course of their mental illness and its management and to their attempts to quit smoking. | Mental health services. | n = 24<br>50% female<br>Age: ranged from 25 – 63 years old.<br>Diagnosis: 6 chronic paranoid schizophrenia; 6 major depressive disorder; 6 bipolar affective disorder; and 6 borderline personality disorder. | Semi-structured interviews. | Cigarette use; quit history, use of NRT and other aids; meanings of smoking, attempts to quit, relationship between smoking and mental illness, experiences in hospital. | Thematic analysis. | Cigarettes as a symbol of control, fulfilling needs of: safety, reassurance, predictability, autonomy.<br>Allowed greater freedom to take part in social activity.<br>Promote more control – over symptoms, mood, and emotions.<br>Cigarettes used by staff as tools to reward, punish or control behaviour.<br>Smoking is the most effective means of avoiding relapse.<br>Smoking as freedom, rebellion and protest.<br>Little hope for recovery.<br>An alternative way out to taking direct action – suicide?<br>Enjoyment.<br>Compensation for losses in other areas of life.<br>Smoking to relieve physical symptoms of mental illness – while many of their symptoms could be described as withdrawal/cravings form cigarette, most attributed these to symptoms of relapse to MI.<br>Tools for decision making, clear thoughts, compartmentalise time, avoidance.<br>Relieve stress, anxiety, to relax.<br>Aid sleep, motivation, stabilise mood swings.<br>Identity as a smoker – companionship of cigarettes.<br>Families, friends, peers all smokers. Service providers and family condoning or colluding with their smoking.<br>Few participants thought they could be successful. |

| Author, Year, Country             | Study aims                                                                                    | Setting                                                                        | Sample                                                                                     | Method        | Interview schedule/discussion guide                                                                                                                           | Type of analysis                         | Barriers to quitting                                                                                                                                                                                                                                                                                                                                                                                                                                                                                                                                              |
|-----------------------------------|-----------------------------------------------------------------------------------------------|--------------------------------------------------------------------------------|--------------------------------------------------------------------------------------------|---------------|---------------------------------------------------------------------------------------------------------------------------------------------------------------|------------------------------------------|-------------------------------------------------------------------------------------------------------------------------------------------------------------------------------------------------------------------------------------------------------------------------------------------------------------------------------------------------------------------------------------------------------------------------------------------------------------------------------------------------------------------------------------------------------------------|
|                                   |                                                                                               |                                                                                |                                                                                            |               |                                                                                                                                                               |                                          | Few participants had tried NRT, citing cost as the main barrier.<br>Excluded from mainstream quit programmes.<br>Misunderstood and judged, double dose of stigma from smoking policy changes.                                                                                                                                                                                                                                                                                                                                                                     |
| Lucksted et al 2000 (94).<br>USA. | Explore pros and cons of smoking and quitting smoking in psychosocial rehabilitation clients. | One urban and one suburban psychosocial rehabilitation groups.                 | n = 40<br>70% male<br>Demographic characteristics (including diagnosis) were not assessed. | Focus groups. | Semi-structured discussion guide: Positive and negative things about quitting, barriers and facilitators to quitting, other issues.                           | Thematic analysis.                       | The positive anti-depressive, anti-anxiety, calming, and cognitive-focusing effects of tobacco.<br>Symptom management (symptoms of mental illness and also side effects from medications).<br>Boredom.<br>Enjoyment<br>Others beliefs – friends and family encouraging smoking as it was perceived to be one of few positive things in the individual's life.<br>Ignoring health effects and health campaigns or accepting the risks.<br>Lack of motivation.<br>Smoking offered sense of identity and feeling included.                                           |
| Morris et al 2009 (95).<br>USA.   | To explore the perceptions of clients and staff on how best to quit smoking.                  | Consumers of mental health services in both rural and urban areas of Colorado. | n = 62                                                                                     | Focus groups. | Preferences for smoking cessation, views on current resources available, health professional practices that aid in cessation, factors that prevent cessation. | Content analysis.<br>NVivo 7.            | Lack of resources to aid in cessation.<br>Seeing health professionals smoking had a negative impact on participants' motivation to quit.<br>Earning smoking as a behavioural reward.<br>Negative expectations of the ability of people with a mental illness to quit smoking.<br>Little knowledge of the negative health effects of cigarette smoking.<br>Smoking to manage stress/anxiety/tension, psychiatric symptoms, and to enhance cognitive ability.<br>Boredom.<br>Smoking viewed as a social event, as a way of connecting with others.<br>Peer smoking. |
| Nawaz et al 2012 (96).            | To explore the smoking and quitting beliefs, attitudes and behaviours amongst smokers         | Large psychiatric rehabilitation agency in Chicago, Illinois.                  | n = 36<br>Ethnicity: 17 African American; 12 Latino; 7 White.                              | Focus groups. | Not reported.                                                                                                                                                 | Qualitative analysis.<br>Atlas.ti.5.7.1. | Tobacco use promoted, normalized and reinforced in mental health treatment community.<br>Smoking ameliorated illness symptoms and memories of traumatic experiences.<br>Manage daily stress that might otherwise aggravate mental illness symptoms.                                                                                                                                                                                                                                                                                                               |

| Author, Year, Country             | Study aims                                                                                                                                     | Setting                                                            | Sample                                                                                                                                                         | Method                      | Interview schedule/discussion guide                                                                                                                                                       | Type of analysis              | Barriers to quitting                                                                                                                                                                                                                                                                                                                                                                    |
|-----------------------------------|------------------------------------------------------------------------------------------------------------------------------------------------|--------------------------------------------------------------------|----------------------------------------------------------------------------------------------------------------------------------------------------------------|-----------------------------|-------------------------------------------------------------------------------------------------------------------------------------------------------------------------------------------|-------------------------------|-----------------------------------------------------------------------------------------------------------------------------------------------------------------------------------------------------------------------------------------------------------------------------------------------------------------------------------------------------------------------------------------|
| USA                               | with severe mental illness from three different race/ethnicity groups.                                                                         |                                                                    | Diagnosis:<br>14.3 – 33.3% Schizophrenia/<br>Schizo-affective; 14.3 – 23.5% bipolar depression;<br>35.3 – 50% Major depression;<br>11.8 – 28.6% not specified. |                             |                                                                                                                                                                                           |                               | Smoking norm amongst peers in treatment settings – highly prevalent.<br>Use of cigarettes to manage/reward behaviour.<br>Policies that prohibited smoking in only parts of treatment centres/halfway houses etc.<br>Difficulty of quitting<br>Lack of access to treatment – directly linked to poor health insurance and poverty.<br>Financial cost of NRT and other pharmacotherapies. |
| Prochaska et al 2013 (103)<br>USA | Aimed to obtain formative data to guide development of a tobacco cessation smoking program for youth with co-occurring mental health disorders | Outpatient mental health settings in the san Francisco bay area.   | n = 14<br>43% female.<br>Between ages of 16 – 23.                                                                                                              | Semi-structured interviews. | Semi-structured interviews: reasons for smoking, perceived relationship between tobacco use and mental health issues, perceptions of smoking and preferences for program characteristics. | Content analysis.<br>ATLAS.ti | Failure to enforce no smoking ban in the home<br>Parental smoking<br>Peers who smoke being a negative influence<br>Difficulty maintaining relationships if quit smoking<br>Stress<br>Affect<br>Other substances<br>Addiction<br>Media images                                                                                                                                            |
| Ratschen et al 2010 (105)<br>UK   | To explore patients' experience, smoking behaviour and symptoms of nicotine withdrawal in the                                                  | Two acute mental health wards and one ten bed intensive care unit. | n = 15<br>60% male<br>Mean age: 42.3 (ranged from 27 – 61).<br>Mental illness diagnoses: Schizophrenia,                                                        | Semi-structured interviews. | Current smoking behaviour, their individual experience, knowledge, beliefs, and feelings related to smoking, quitting smoking,                                                            | Framework analysis.           | Dealing with stress.<br>Dealing with boredom.<br>Habit.<br>Enjoyment.<br>Anxiety.<br>Peer pressure.<br>NRT use:<br>Disliked the taste of nicotine gum, reported allergic                                                                                                                                                                                                                |

1  
2  
3  
4  
5  
6  
7  
8  
9  
10  
11  
12  
13  
14  
15  
16  
17  
18  
19  
20  
21  
22  
23  
24  
25  
26  
27  
28  
29  
30  
31  
32  
33  
34  
35  
36  
37  
38  
39  
40  
41  
42  
43  
44  
45  
46  
47

| Author, Year, Country               | Study aims                                                                                     | Setting                                                                                                                                                                                        | Sample                                                                                                                                                    | Method        | Interview schedule/discussion guide                                                                                                                | Type of analysis                                   | Barriers to quitting                                                                                                                                                                                                                                                                                                                                                                                                                                                                                                                                                                                                                                                                                                                                                                                                                                                                                                                                                                                                                                        |
|-------------------------------------|------------------------------------------------------------------------------------------------|------------------------------------------------------------------------------------------------------------------------------------------------------------------------------------------------|-----------------------------------------------------------------------------------------------------------------------------------------------------------|---------------|----------------------------------------------------------------------------------------------------------------------------------------------------|----------------------------------------------------|-------------------------------------------------------------------------------------------------------------------------------------------------------------------------------------------------------------------------------------------------------------------------------------------------------------------------------------------------------------------------------------------------------------------------------------------------------------------------------------------------------------------------------------------------------------------------------------------------------------------------------------------------------------------------------------------------------------------------------------------------------------------------------------------------------------------------------------------------------------------------------------------------------------------------------------------------------------------------------------------------------------------------------------------------------------|
|                                     | context of a comprehensive smokefree policy on mental health acute wards.                      |                                                                                                                                                                                                | schizotypal disorders (n = 5); mood and affective disorders (n = 7); neurotic, stress related and somatoform disorders (n = 1); organic disorder (n = 1). |               | the smoke-free policy and the environment of the wards; the support offered to them on the wards; and their potential interest in further support. |                                                    | skin reactions to patches, and, for one participant, a fear of NRT.<br>Negative reactions to taking additional medication on top of that for their mental illness                                                                                                                                                                                                                                                                                                                                                                                                                                                                                                                                                                                                                                                                                                                                                                                                                                                                                           |
| Snyder et al 2008 (97).<br><br>USA. | Identify multi-level factors that impact on smoking cessation with people with mental illness. | Two psychiatric rehabilitation centres within the mid-west of the USA. One dual diagnosis, one offering rehabilitation services for predominantly African American people with mental illness. | n = 25<br>75% male<br>Aged between 24 and 55.<br>Diagnoses not reported.                                                                                  | Focus groups. | Views and perspectives on smoking and cessation, factors that acted as motivators for smoking, factors that motivated cessation.                   | Iterative analysis process.<br><br>QSR NUDI*ST N4. | Low confidence in quitting.<br>Desire to smoke was stronger than desire to quit.<br>NRT seen as ineffective leading to feelings of hopelessness.<br>Sense of autonomy over behaviour; participants felt that making the choice to smoke was empowering.<br>Conversely, a sense of having no control over smoking due to addiction was also a barrier.<br>Smoking as a central part of life.<br>Coping mechanism for stress, anxiety, depression, boredom and loneliness.<br>Cigarettes were an affordable luxury.<br>Being able to purchase cigarettes was a source of self-esteem.<br>Belief that if they quit, they would have nothing else enjoyable to do.<br>Beliefs around the health effects of smoking:<br>Participants reported health benefits from smoking and minimised health risks.<br>Non-smokers are able to refrain from smoking because they are not disadvantaged.<br>Belief that non-smokers don't have as much fun.<br>Feeling judged or nagged by non-smokers.<br>Smoking offering opportunity for connection and social interaction. |

| Author, Year, Country            | Study aims                                                                                            | Setting                                                | Sample                                                                                                                                | Method                      | Interview schedule/discussion guide                                     | Type of analysis                                                                    | Barriers to quitting                                                                                                                                                                                                                                                                                                                                                                                                                                                                                                                                                                                                                                                                                                                                                                                                                                                                                                                         |
|----------------------------------|-------------------------------------------------------------------------------------------------------|--------------------------------------------------------|---------------------------------------------------------------------------------------------------------------------------------------|-----------------------------|-------------------------------------------------------------------------|-------------------------------------------------------------------------------------|----------------------------------------------------------------------------------------------------------------------------------------------------------------------------------------------------------------------------------------------------------------------------------------------------------------------------------------------------------------------------------------------------------------------------------------------------------------------------------------------------------------------------------------------------------------------------------------------------------------------------------------------------------------------------------------------------------------------------------------------------------------------------------------------------------------------------------------------------------------------------------------------------------------------------------------------|
|                                  |                                                                                                       |                                                        |                                                                                                                                       |                             |                                                                         |                                                                                     | Boredom; days left relatively unstructured so smoking filled in the time.                                                                                                                                                                                                                                                                                                                                                                                                                                                                                                                                                                                                                                                                                                                                                                                                                                                                    |
| Solway et al, 2011 (98).<br>USA. | Explore the perceptions of people with mental illness on smoking and smoking cessation.               | Outpatient mental health services                      | n = 26<br>38% female<br>Mean age: 62 (ranged from 41 – 82).<br>Nearly all participants had been diagnosed with severe mental illness. | Focus groups.               | Semi-structured interview protocol.                                     | Constructivist grounded theory.                                                     | Perceived benefits of smoking outweigh the negative health risks.<br>Enjoyment.<br>Relaxation.<br>Experience cravings when feeling anxious or upset or in the company of other smokers.<br>Sense of control over emotions.<br>Feeling extremely daunted about the quit process and withdrawal symptoms in general.<br>Cost and accessibility of NRT.<br>Lack of willpower, motivation and the right frame of mind.<br>Smoking provides an identity and also acts as a source of connectedness over the sense of exclusion/stigma of having mental illness.<br>Freedom, exercise their right to choose and maintain independence.<br>Smoking as a 'friend'.<br>Symptom management.<br>Continued smoking eliminates withdrawal symptoms.<br>Other's expectations of their ability to quit smoking.<br>Feeling that smoking and medications to treat mental illness are related. Smoking to relieve side effects of medication.<br>Weight gain. |
| Tsourtos et al 2008 (99).<br>AUS | Explore why non-smokers appear to be resilient to smoking in a highly acceptable and prevalent group. | General practice and a range of mental health services | n = 34<br>58% female<br>All had diagnoses of depression.                                                                              | Semi-structured interviews. | Smoking and participants' social environment throughout the lifecourse. | Components of Grounded Theory were used with an analytic framework.<br><br>NVivo 8. | Smoking to deal with stress:<br>Stressors included: boredom; physical injury; death of a loved one; stressful occupation; relationship breakdown; one or more medically diagnosed disorders.<br>Coping mechanism.<br>Relaxation.<br>Comfort.<br>Strength.<br>Quitting smoking would exacerbate stress.<br>Depression and anxiety made quitting more difficult.                                                                                                                                                                                                                                                                                                                                                                                                                                                                                                                                                                               |



| Author, Year, Country                  | Study aims                                                                                                     | Setting                                                                   | Sample                                                                                                                                                                        | Method                   | Interview schedule/discussion guide                                                                                                     | Type of analysis                                                                  | Barriers to quitting                                                                                                                                                                                                                                                                                                                                                                                                                                                                                                                                                                                                                                                                                                               |
|----------------------------------------|----------------------------------------------------------------------------------------------------------------|---------------------------------------------------------------------------|-------------------------------------------------------------------------------------------------------------------------------------------------------------------------------|--------------------------|-----------------------------------------------------------------------------------------------------------------------------------------|-----------------------------------------------------------------------------------|------------------------------------------------------------------------------------------------------------------------------------------------------------------------------------------------------------------------------------------------------------------------------------------------------------------------------------------------------------------------------------------------------------------------------------------------------------------------------------------------------------------------------------------------------------------------------------------------------------------------------------------------------------------------------------------------------------------------------------|
| <b>Homeless</b>                        |                                                                                                                |                                                                           |                                                                                                                                                                               |                          |                                                                                                                                         |                                                                                   |                                                                                                                                                                                                                                                                                                                                                                                                                                                                                                                                                                                                                                                                                                                                    |
| Okuyemi et al 2006 (108).<br><br>USA.  | Examine the views of homeless people on smoking practices, knowledge and barriers to and interest in quitting. | Homeless service facilities                                               | n = 62<br>68% response rate<br>70% male<br>Ethnicity: 58% black; 37% white and 5% other.<br><br>Age: mean = 41.5 (SD = 9.3).<br>Education: 73% high school educated or lower. | Focus groups.            | Smoking history; quitting experiences; smoking cessation aids (NRT and other medications); preferences for smoking cessation treatment. | Principles outlined by Morgan and Krueger.<br><br>Atlas-ti v 4.1 used for coding. | Low self-efficacy.<br>Limited access to care (cost of cessation aids).<br>Service providers offer limited support to quit.<br>Competing needs e.g. food, shelter.<br>Uncertainty associated with being homeless.<br>Limited structure and routine – keeping busy to avoid boredom.<br>Smoking as a socially acceptable behaviour in homeless settings.<br>Few restrictions in homeless services.<br>Fear that quitting smoking may result in changes in emotion/stress levels that may impact negatively on other areas of life.<br>Concerns about using NRT and cost, taste, proper usage and side effects, interactions with other medications and effect on other health conditions.<br>Concern about becoming addicted to NRT. |
| <b>Prisoners</b>                       |                                                                                                                |                                                                           |                                                                                                                                                                               |                          |                                                                                                                                         |                                                                                   |                                                                                                                                                                                                                                                                                                                                                                                                                                                                                                                                                                                                                                                                                                                                    |
| Richmond et al 2009 (110).<br><br>AUS. | Investigate tobacco and its role in prisons.                                                                   | One maximum security prison and one community justice restorative centre. | n = 40 (9 prisoners and 31 ex-prisoners).<br>30% female<br>Age: ranged from mid 20s to late 40s.<br>Ethnicity: 4 Aboriginal Australian participants                           | Focus groups.            | Role of tobacco in prisons, reasons for smoking initiation, smoking cessation, methods to quit.                                         | Content analysis.                                                                 | Poor knowledge of cessation strategies.<br>Some had not heard of bupropion, would not attend a doctor for assistance and would not attend quit smoking programs once in the community.<br>Smoking as a normal practice in prison.<br>Cigarettes as a substitute for money.<br>Boredom, stress, anxiety regarding legal matters, being locked up for large portions of the day and social isolation.<br>Cigarettes/smoking used as a reward.<br>Transfer to another wing or prison.<br>Bullying, missing family, isolation,                                                                                                                                                                                                         |
| <b>At risk youth</b>                   |                                                                                                                |                                                                           |                                                                                                                                                                               |                          |                                                                                                                                         |                                                                                   |                                                                                                                                                                                                                                                                                                                                                                                                                                                                                                                                                                                                                                                                                                                                    |
| Lewis et al 2013(111)                  | Aims to contribute to the existing literature                                                                  | Communities in North East of England –                                    | n = 52<br>58% female                                                                                                                                                          | Participant observation. | NA                                                                                                                                      | Thematic analysis.                                                                | Surrounded by other smokers makes it too hard to quit.<br>A lot of family and friends smoke<br>Helps with stress – conflicting messages – some                                                                                                                                                                                                                                                                                                                                                                                                                                                                                                                                                                                     |

| Author, Year, Country                       | Study aims                                                                                                                        | Setting                                                                                              | Sample                                                        | Method                      | Interview schedule/discussion guide                                                                         | Type of analysis    | Barriers to quitting                                                                                                                                                                                                                                                                                                                                                                                                                                         |
|---------------------------------------------|-----------------------------------------------------------------------------------------------------------------------------------|------------------------------------------------------------------------------------------------------|---------------------------------------------------------------|-----------------------------|-------------------------------------------------------------------------------------------------------------|---------------------|--------------------------------------------------------------------------------------------------------------------------------------------------------------------------------------------------------------------------------------------------------------------------------------------------------------------------------------------------------------------------------------------------------------------------------------------------------------|
| UK                                          | on smoking and young people and to clarify how factors related to young people and smoking play out in disadvantaged communities. | deindustrialisation – former coal mining village.                                                    | Aged between 11 to 18 years.                                  |                             |                                                                                                             |                     | participants felt it did and did not relieve stress. For fun and enjoyment. Accessibility and availability: tab (cigarette) houses – private dwellings where people can buy cigarettes- always sell to underage people. Buying a packet from the tab houses and then selling at school. Mixed messages regarding smoking: people in authority not discouraging or addressing smoking (e.g. teachers, police force).                                          |
| <b>Multiple groups</b>                      |                                                                                                                                   |                                                                                                      |                                                               |                             |                                                                                                             |                     |                                                                                                                                                                                                                                                                                                                                                                                                                                                              |
| Garner et al 2013 (112)<br><br>UK<br><br>UK | Explore homeless smokers' views, attitudes, experiences and knowledge with regard to smoking and quitting in an urban UK setting. | One drug harm reduction and sexual health service commissioned by the NHS in Nottingham city centre. | n = 15<br>73% male<br>Aged between 18 to 53 years; mean = 33. | Semi-structured interviews. | Demographics, smoking history, nicotine dependence, quitting related behaviours, experiences and attitudes. | Framework analysis. | Low confidence. High prevalence of peer smoking behaviour. Exposure to a social environment where smoking was the norm. Homeless service staff providing cigarettes. Use of cigarettes as a reward for carrying out small jobs around the service. Use of other substances including alcohol and other drugs. Stress management within already stressful life circumstances. Lack of encouragement or active discouragement by health professionals to quit. |

1  
2  
3  
4  
5  
6  
7  
8  
9  
10  
11  
12  
13  
14  
15  
16  
17  
18  
19  
20  
21  
22  
23  
24  
25  
26  
27  
28  
29  
30  
31  
32  
33  
34  
35  
36  
37  
38  
39  
40  
41  
42  
43  
44  
45  
46  
47

Supplementary file 4. Summaries of the included mixed methods studies by disadvantaged group (n = 3).

| Author, Year, Country     | Study aims                                                                                           | Setting       | Sample                                                                                        | Response rate | Type of survey (cross-sectional, etc)                                               | Outcome measure (and info on survey instrument)                                                                                                                                                                                      | Qualitative method and type of analysis                                          | Quantitative results (barrier and prevalence)                                                                                                                                                       | Qualitative data (barriers identified)                                                                                                                                                                           |
|---------------------------|------------------------------------------------------------------------------------------------------|---------------|-----------------------------------------------------------------------------------------------|---------------|-------------------------------------------------------------------------------------|--------------------------------------------------------------------------------------------------------------------------------------------------------------------------------------------------------------------------------------|----------------------------------------------------------------------------------|-----------------------------------------------------------------------------------------------------------------------------------------------------------------------------------------------------|------------------------------------------------------------------------------------------------------------------------------------------------------------------------------------------------------------------|
| <b>Indigenous studies</b> |                                                                                                      |               |                                                                                               |               |                                                                                     |                                                                                                                                                                                                                                      |                                                                                  |                                                                                                                                                                                                     |                                                                                                                                                                                                                  |
| Glover, 2005 (79). NZ.    | Increase the understanding of smoking in Maori populations and best ways to affect smoking cessation | Not reported. | n = 130 self-identified Maori participants. 78% female. Age: mean = 35 (ranged from 16 – 62). | Not reported. | Pre and post interviews after a quit attempt (both open and close ended questions). | Smoking history, Smoking behaviour, Quit history, Fagerstrom NDT, Experience of relapse, Reasons for smoking, Motivation to quit, Self-efficacy, Stage of Change, Methods of quitting, Quit abstinence – not biochemically verified. | Semi-structured interviews General inductive approach. QSR NUD*IST Release V4.0. | Habit: 73%<br>Normal to smoke: 11.5%<br>Coping with stress: 48%<br>Coping with emotions: 23%<br>Addiction: 39%<br>Socialising/drinking: 34%<br>Bored: 29%<br>Enjoyment: 25%<br>Time out/reward: 17% | Relapse was also related to poor self-esteem and a tendency to attribute blame to themselves. Living with other smokers. Family (Whanau) directly or indirectly supporting relapse. Socialising. Others smoking. |

| Author, Year, Country               | Study aims                                                                     | Setting                                                                        | Sample                                                                                                         | Response rate | Type of survey (cross-sectional, etc)  | Outcome measure (and info on survey instrument)                                                          | Qualitative method and type of analysis          | Quantitative results (barrier and prevalence)                                                                                                                                                                                                                               | Qualitative data (barriers identified)                                                                                                                                                                                                                                                                                                                              |
|-------------------------------------|--------------------------------------------------------------------------------|--------------------------------------------------------------------------------|----------------------------------------------------------------------------------------------------------------|---------------|----------------------------------------|----------------------------------------------------------------------------------------------------------|--------------------------------------------------|-----------------------------------------------------------------------------------------------------------------------------------------------------------------------------------------------------------------------------------------------------------------------------|---------------------------------------------------------------------------------------------------------------------------------------------------------------------------------------------------------------------------------------------------------------------------------------------------------------------------------------------------------------------|
| <b>Mental illness studies</b>       |                                                                                |                                                                                |                                                                                                                |               |                                        |                                                                                                          |                                                  |                                                                                                                                                                                                                                                                             |                                                                                                                                                                                                                                                                                                                                                                     |
| Goldberg et al 1996 (90).<br>CAN    | Identify what clients identify as barriers and facilitators to cessation.      | Community based psychiatric rehabilitation program (mid-sized urban Canadian). | n = 105<br>68% male<br>Age: mean = 35 (ranged from 20 to 58 years).<br>Diagnoses not reported.                 | 93%           | Telephone and face to face interviews. | Reasons for smoking, why it is hard to quit, beliefs about support required to change smoking behaviour. | Focus groups.<br>Type of analysis not specified. | Addiction: 53%<br>Difficulty resisting cravings: 33%<br>Enjoyment: 20%<br>Relieving symptoms: 20%<br>Habit: 19%<br>Boredom: 17%<br>Most or all friends are smokers: 12.5%<br>Low cost of cigarettes: 8% to smoke, lack of support to quit.<br>Smoking as a social activity. | Afraid of giving up old friend. Withdrawal symptoms. Enhanced mood.<br>Cheap thrill.<br>Coping strategy when stressed.<br>Something to do.<br>Apathy and daily drudgery associated with psychiatric disability.<br>Peer pressure to smoke.<br>Lack of support from peers to quit.<br>Smoking as a social activity.<br>Receiving cigarettes from family and friends. |
| Van Dongen et al 1999 (100).<br>USA | Examine the experiences of persons with persistent mental illness and smoking. | Outpatient clinic, Midwest, USA.                                               | n = 36<br>75% male<br>Age: mean ranged from 45 to 49.<br>Diagnosis: Schizophrenia (70% - 90%); schizoaffective | Not reported  | Cross-sectional survey.                | Not reported.                                                                                            | Interviews.<br>Content analysis.                 | Habit and routine: 58%<br>Socialization: 58%<br>Relaxation: 42%<br>Addiction to nicotine: 33%                                                                                                                                                                               | Smoking provided structure and activity.<br>Something to do.<br>Way to deal with stress.                                                                                                                                                                                                                                                                            |

1  
2  
3  
4  
5  
6  
7  
8  
9  
10  
11  
12  
13  
14  
15  
16  
17  
18  
19  
20  
21  
22  
23  
24  
25  
26  
27  
28  
29  
30  
31  
32  
33  
34  
35  
36  
37  
38  
39  
40  
41  
42  
43  
44  
45  
46  
47

| Author, Year, Country | Study aims | Setting | Sample                                                    | Response rate | Type of survey (cross-sectional, etc) | Outcome measure (and info on survey instrument) | Qualitative method and type of analysis | Quantitative results (barrier and prevalence) | Qualitative data (barriers identified) |
|-----------------------|------------|---------|-----------------------------------------------------------|---------------|---------------------------------------|-------------------------------------------------|-----------------------------------------|-----------------------------------------------|----------------------------------------|
|                       |            |         | tive and mood disorders were the other diagnoses present. |               |                                       |                                                 |                                         |                                               |                                        |

## Supplementary file 5. Overview of study characteristics

### Study characteristics

Approximately half (52%) of the studies had been published from 2009 onwards. Apart from three studies (86, 103, 111), all participants were adults aged 18 years and over. Studies were carried out in the USA (n=29) (49, 51, 54, 56, 60, 66, 70, 72, 73, 76, 78, 81, 82, 84, 86, 88, 89, 94-98, 100, 101, 103, 104, 106-108); Australia (n=15) (29, 52, 55, 57, 68, 74, 75, 80, 83, 85, 87, 93, 99, 102, 110); the United Kingdom (n=13) (50, 53, 61, 62, 67, 69, 71, 91, 92, 105, 109, 111, 112); Canada (n=5), New Zealand (n=2) (77, 79) and France (n=1) (59). Qualitative (n=54) (29, 49-59, 61-69, 71-78, 80-87, 89, 91-99, 102, 103, 105, 108, 110-112); quantitative (n=8) (26, 60, 70, 88, 101, 106, 107, 109) and mixed method studies (n=3) (79, 90, 100) were included. Of the qualitative studies, 26 used focus group methods (29, 49, 51, 52, 54-56, 61, 62, 65, 66, 72, 73, 76-78, 80-82, 84, 86, 94, 96, 97, 108, 110); 19 used interviews (50, 53, 57-59, 67, 69, 71, 75, 83, 89, 91-93, 99, 102, 103, 105, 112) and eight used a combination of interviews and focus groups (63, 64, 68, 74, 85, 87, 95, 98). One qualitative paper used participant observation methods (111). All eight quantitative studies utilised cross-sectional survey methods (26, 60, 70, 88, 101, 106, 107, 109). Two mixed methods studies used both cross-sectional surveys and interview ((79, 100) and one mixed methods study used cross-sectional surveys and focus groups (90). Twelve studies included only female participants (53, 54, 56, 58, 63-65, 67, 76, 85, 87, 91), five of which were carried out with pregnant women (54, 58, 67, 87, 91). Two studies were carried out with men only; partners of women who were pregnant (57) and disadvantaged former miners (71).

### Quality assessment of qualitative studies

This figure includes assessment of the qualitative components of the mixed methods studies. The majority of studies did not explicitly state their study design (n = 42); of those that did, most used Grounded Theory (57, 59, 61, 93, 98, 99). Most studies provided adequate descriptions of the study sites; participants; data collection methods and analysis techniques. Only a small number of studies (n = 11) (51, 54, 58, 75, 76, 78, 83, 84, 96, 111, 112) addressed the role of the relationship between participants and the researcher and fewer still identified potential assumptions and biases of the researcher (n = 5) (51, 54, 61, 83, 98). Studies generally performed poorly when assessed on four components of trustworthiness, with only 17 studies meeting all four criteria (credibility; transferability; dependability and confirmability) (49, 52, 56, 58, 65, 67, 71, 73, 74, 77, 78, 80, 82, 83, 85, 86, 93). It should be

1  
2  
3 noted that none of the mixed methods studies explicitly described their methodology as  
4 mixed methods nor did they report integrating the qualitative and quantitative findings in a  
5 systematic way.  
6  
7

### 8 **Quality assessment of quantitative studies**

9  
10 The results of the quality assessment of quantitative studies are provided in  
11 Supplementary file 6. This table also provides assessment of the quantitative components of  
12 included mixed methods studies. Sample sizes in the quantitative studies ranged from 36 to  
13 500 participants. Response rates ranged from 42% to over 97% (four studies did not provide  
14 response rates) (79, 100, 104, 106). All but one study (90) clearly stated eligibility criteria.  
15  
16 The majority of studies adequately described the research aims (60, 70, 79, 88, 90, 101, 104,  
17 106, 107); source of participants(60, 88, 90, 100, 106, 107) and addressed potential sources of  
18 bias within their analysis (60, 88, 107, 109). All studies stated their outcome *a priori* and no  
19 conflicts of interest were identified. Eight studies used convenience sampling (88, 90, 100,  
20 101, 104, 106, 107, 109). The validity and reliability of survey measures used to assess  
21 barriers to cessation were reported in one study (60). Three studies employed techniques such  
22 as pilot testing and input from key stakeholders in developing the tools used (60, 70, 109).  
23  
24  
25  
26  
27  
28  
29  
30  
31  
32  
33  
34  
35  
36  
37  
38  
39  
40  
41  
42  
43  
44  
45  
46  
47  
48  
49  
50  
51  
52  
53  
54  
55  
56  
57  
58  
59  
60

## Number of studies meeting all criteria for quality assessment

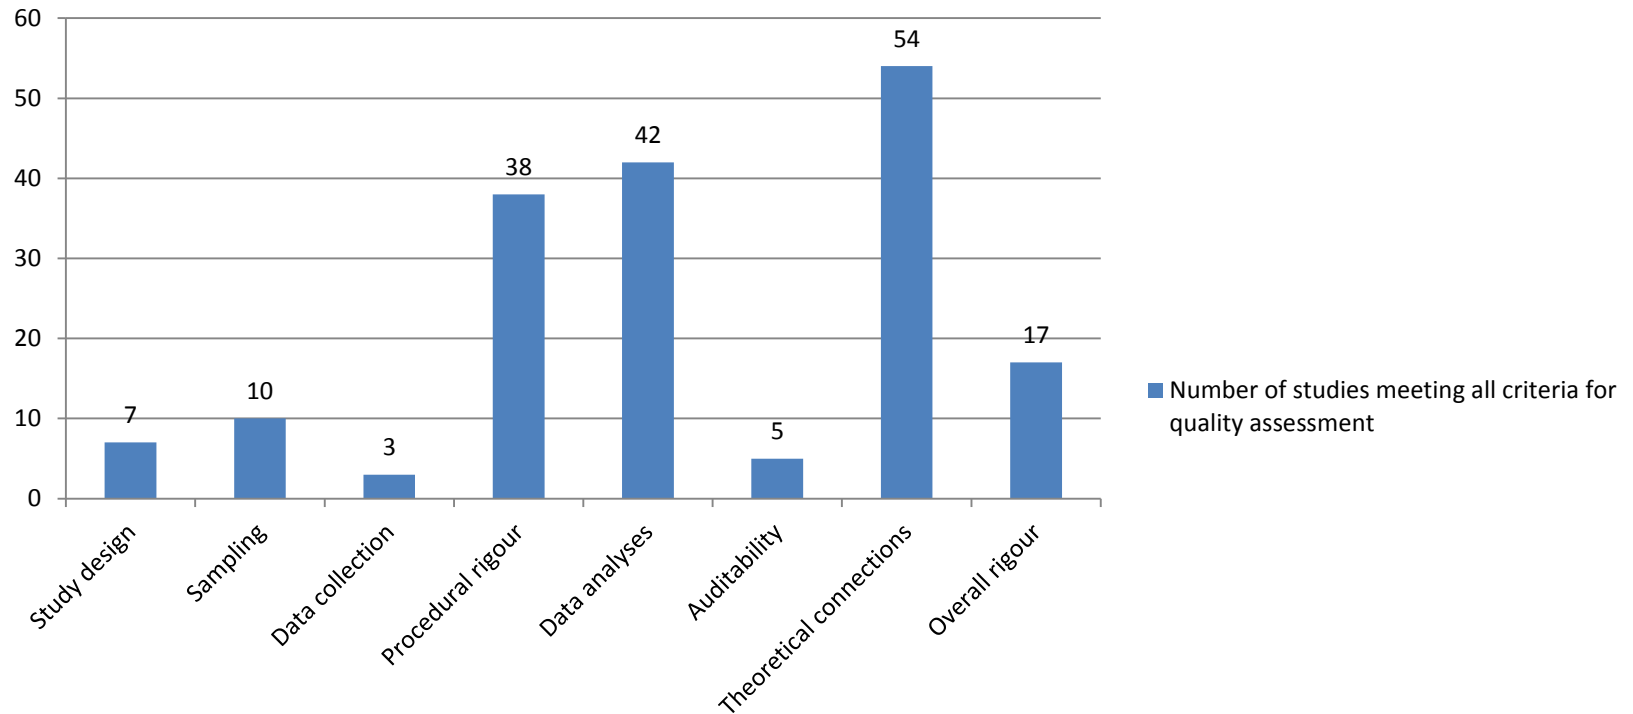

Supplementary figure 6. Quality of included qualitative studies and qualitative components of mixed methods studies (n = 57)



## Supplementary file 7. Results of the quality assessment of quantitative studies and quantitative components of mixed methods studies

| Study author and year     | Aims | Selection methods    |                              |                                   | Was the measurement of variables appropriate? |                       |                          | Control of bias    |                            |                            | Was the use of statistics appropriate? |              | Conflict of interest |
|---------------------------|------|----------------------|------------------------------|-----------------------------------|-----------------------------------------------|-----------------------|--------------------------|--------------------|----------------------------|----------------------------|----------------------------------------|--------------|----------------------|
|                           |      | Aims clearly stated? | Eligibility criteria stated? | Source of participants described? | Selection method?                             | Validity of measures? | Reliability of measures? | Other method used? | Potential sources of bias? | Methods to deal with bias? | Response rate (%)?                     | Sample size? |                      |
| Price et al 1994 (60)     | ✓    | ✓                    | ✓                            | Random sampling                   | ✓                                             | ✓                     | ✓                        | ✓                  | ✗                          | 42                         | 500                                    | ✓            | ✓                    |
| Rosenthal et al 2013 (70) | ✓    | ✗                    | ✓                            | Random sampling                   | ✗                                             | ✗                     | ✓                        | ✓                  | ✗                          | 73                         | 350                                    | ✓            | ✓                    |
| Dickens et al 2005 (109)  | ✗    | ✓                    | ✓                            | Convenience sample                | ✗                                             | ✗                     | ✓                        | ✓                  | ✗                          | 44.1                       | 45                                     | ✓            | ✓                    |
| Connor et al 2002 (107)   | ✓    | ✓                    | ✓                            | Convenience sample                | ✗                                             | ✗                     | ✗                        | ✓                  | ✓                          | >97                        | 236                                    | ✓            | ✓                    |
| Asher et al 2003 (101)    | ✓    | ✓                    | ✓                            | Convenience sample                | ✗                                             | ✗                     | ✗                        | ✗                  | ✗                          | 73                         | 96                                     | ✓            | ✓                    |
| Carosella et al 1999 (88) | ✓    | ✓                    | ✓                            | Convenience sample                | ✗                                             | ✗                     | ✗                        | ✓                  | ✗                          | 80.9                       | 89                                     | ✓            | ✓                    |
| Orleans et al 1993(104)   | ✓    | ✗                    | ✓                            | Convenience sample                | ✗                                             | ✗                     | ✓                        | ✗                  | ✗                          | ✗                          | ✗                                      | ✓            | ✗                    |

| Study author and year      | Aims | Selection methods            |                                   |                     | Was the measurement of variables appropriate? |                          |                    | Control of bias            |                            |                    | Was the use of statistics appropriate? |                                  | Conflict of interest |
|----------------------------|------|------------------------------|-----------------------------------|---------------------|-----------------------------------------------|--------------------------|--------------------|----------------------------|----------------------------|--------------------|----------------------------------------|----------------------------------|----------------------|
|                            |      | Eligibility criteria stated? | Source of participants described? | Selection method?   | Validity of measures?                         | Reliability of measures? | Other method used? | Potential sources of bias? | Methods to deal with bias? | Response rate (%)? | Sample size?                           | Primary outcome stated a priori? |                      |
| Arnsten et al 2004(106)    | ✓    | Y                            | ✗                                 | Convenience sample. | ✗                                             | ✗                        | ✗                  | ✗                          | ✗                          | ✗                  | 98                                     | ✓                                | ✓                    |
| Glover et al 2005 (79)     | ✓    | ✓                            | ✗                                 | Not reported        | ✗                                             | ✗                        | ✗                  | ✗                          | ✗                          | ✗                  | 130                                    | ✓                                | ✓                    |
| Van Dongen et al 1999(100) | ✗    | ✓                            | ✓                                 | Convenience sample  | ✓                                             | ✗                        | ✗                  | ✗                          | ✗                          | ✗                  | 36                                     | ✓                                | ✓                    |
| Goldberg et al 1996(90)    | ✓    | ✓                            | ✓                                 | Convenience sample  | ✗                                             | ✗                        | ✗                  | ✗                          | ✗                          | 93                 | 105                                    | ✓                                | ✓                    |

1  
2  
3  
4  
5  
6  
7  
8  
9  
10  
11  
12  
13  
14  
15  
16  
17  
18  
19  
20  
21  
22  
23  
24  
25  
26  
27  
28  
29  
30  
31  
32  
33  
34  
35  
36  
37  
38  
39  
40  
41  
42  
43  
44  
45  
46  
47  
48  
49  
50  
51  
52  
53  
54  
55  
56  
57  
58  
59  
60

Supplementary file 8: Detailed summary of barriers identified

## **Individual & lifestyle factors**

### ***Relaxation, stress and mood management***

Forty qualitative studies identified stress management as a significant barrier to smoking cessation (50-56, 58, 59, 61-63, 65, 67-69, 72, 74, 75, 80, 81, 83, 84, 86, 87, 89, 90, 92, 93, 95-97, 99, 100, 103, 105, 108, 110-112). Smoking was used as a coping mechanism (52, 58, 62-65, 69, 74, 89, 90, 92, 97, 99) in reaction to daily stressors as well as the stress inherent in disadvantaged lives. Three quantitative studies reported stress management as a barrier to quitting with Maori participants (48%) (79), participants with substance use disorders (39%) (104) and homeless participants (44%) (107). Of note, participants in two studies reported that smoking also directly contributed to the stress experienced by participants (51, 111).

Participants also reported using smoking to manage their emotions and mood (58, 65, 72, 83, 84, 90, 93, 98, 103, 113). Twenty three percent of participants from a Maori sample indicated managing emotions was a barrier to quitting (79), 42% of individuals with a substance use disorder (101).

### ***Enjoyment of smoking***

Across 22 studies, smoking was described as an enjoyable activity (50, 55, 56, 59, 62, 63, 65, 67, 79, 81-83, 88-90, 92-94, 97, 98, 105, 111). In quantitative studies, proportions of participants who said enjoyment prevented them from quitting ranged from 25% (79) to 47.2% (88). Smoking was viewed as an affordable, rewarding luxury (50, 55, 63, 79, 93, 97) and the only pleasurable activity some participants had (50, 56, 59, 62, 65).

### ***Physical addiction to nicotine***

Addiction to nicotine was reported as a barrier in 15 qualitative studies (49, 50, 54, 59, 67-69, 72, 74, 75, 81, 83, 84, 91, 92) (103) and four quantitative studies (60, 79, 90, 100).

Proportions of individuals who reported addiction to nicotine as a barrier ranged from 33% (100) to 86% (60). The experience of withdrawal symptoms was a barrier to quitting in nine studies (54, 57, 69, 72, 74, 80, 84, 90, 98). Management of cravings was a barrier in ten qualitative studies (49, 54, 68, 69, 72, 80, 84, 86, 90, 98) and one quantitative study (107) where 50% of homeless participants cited cravings as a barrier to cessation. Withdrawal symptoms were especially a barrier for individuals with substance use disorder, with 87% feeling tense or irritable if they quit smoking, and 48% saying their cravings would be so strong they couldn't stand it (101).

### ***Behavioural habit of smoking***

1  
2  
3  
4  
5  
6  
7  
8  
9  
10  
11  
12  
13  
14  
15  
16  
17  
18  
19  
20  
21  
22  
23  
24  
25  
26  
27  
28  
29  
30  
31  
32  
33  
34  
35  
36  
37  
38  
39  
40  
41  
42  
43  
44  
45  
46  
47  
48  
49  
50  
51  
52  
53  
54  
55  
56  
57  
58  
59  
60

Five quantitative studies (60, 79, 88, 90, 100) and ten qualitative studies (50, 57, 65, 68, 75, 80, 83, 84, 92, 105) reported habit as a barrier to smoking. Proportions of participants who endorsed habit as a barrier ranged from 19% to 58% in studies carried out with people with a mental illness (88, 90, 100); 82% in a low income sample (60) and 73% in a study conducted with Maori participants (79).

### ***Perceived mental health benefits of smoking***

Smoking in order to manage the symptoms of mental illness was identified in the majority of studies carried out with participants with a mental illness (88-98, 102) as well as managing the side effects from medications (92, 94, 98). Smoking in order to protect mental health was also found in one study conducted with low income pregnant women (67). In two community surveys a history of depression was reported as a barrier to smoking cessation (58, 74). Participants with mental illness in two studies perceived that the benefits of continuing to smoke far outweighed the potential risks of stopping, which included relapse, rehospitalisation and suicidal thoughts (89, 98). A large portion (78%) of individual's with substance use disorder would feel anxious if they tried to quit (101).

### ***Avoidance of weight gain***

Fourteen studies reported that smoking was used in weight management, and that potential weight gain was a barrier to quitting (29, 49, 52-54, 64, 67, 72, 74, 84, 91, 98, 101, 107). Twenty percent of homeless participants endorsed weight gain as a barrier to quitting (107) and in 20% of individual with substance use disorder (101). Smoking was also used to suppress appetite for individuals diagnosed with an eating disorder (91) and for low income pregnant women (67).

### ***Competing priorities and needs***

Competing needs, including finding shelter or food for those who were homeless (108); addressing mental health issues (89, 98); or addressing other physical illnesses (56, 74, 99) often meant that smoking cessation was not a priority for participants or those involved in their care in ten studies (56, 63, 74, 75, 87, 89, 91, 98, 99, 108).

### ***Rationalisations to continue smoking***

Lack of acknowledgement of the health-related harm of tobacco use was reported in eight studies (56, 58, 67, 74, 82, 87, 89, 97). Rationalisations to continue smoking were also reported in ten studies (54, 55, 58, 61, 67, 74, 78, 82, 89, 97) and included the belief that smoking certain brands/strengths of cigarettes meant a lower likelihood of developing cancer (82); not experiencing any signs or symptoms of smoking related illness at the present time (54, 58); fatalistic beliefs (56); providing examples of relatives or other persons who are

1  
2  
3 smokers and who are healthy (80, 87); and the experience of disadvantage as a protective  
4 factor against developing smoking related illness (89).

### 7 ***Other substance use***

8  
9 Participants identified associations between smoking and other behaviours in eight studies  
10 including alcohol use (49, 74, 76, 80, 84, 112) cannabis and caffeine (49, 81, 112).

11  
12 Approximately one third (34%) of Maori participants identified alcohol use as a barrier to  
13 quitting smoking(79). Smoking was used to manage other addictions and prevent relapse (59,  
14 89, 103). Alternatives to smoking included drug use, relapse to alcohol addiction and losing  
15 control; all of which were unacceptable to participants (56, 62, 89). For 41% of those  
16 diagnosed with a substance use disorder, quitting would make it harder to remain sober and  
17 13% wouldn't be able to control their cravings for other substances if they quit smoking  
18 (101).

### 24 ***Sense of autonomy***

25  
26 Participants across seven studies reported that smoking provided a sense of autonomy,  
27 control (56, 58, 68, 83, 93, 97, 98) and power (99) over lives that were often chaotic and out  
28 of control. On the other hand, participants with mental illness identified the lack of control  
29 they had over smoking as a barrier to quitting (102).

### 33 ***Low confidence and perceived difficulty of quitting***

34  
35 Low self-efficacy (52, 93, 106, 107) and low confidence (92, 97, 112) was reported in seven  
36 studies. The belief that willpower was the single-most important factor needed to successfully  
37 quit was reported in five studies (51, 52, 64, 67, 69). Participants also reported that the  
38 process of quitting smoking was too hard (52, 80, 96, 98), including 73.5% of prisoners and  
39 ex-prisoners surveyed (109) and 58% of individuals with a substance use disorder (101).

40  
41 Smokers with depression reported it was hopeless to try to quit (102). However, the opposite  
42 was reported by a sample of former miners, who maintained they were able to stop smoking  
43 at will, with minimal difficulty and need for support (71). Twenty five percent of individuals  
44 with substance abuse disorder said they did not know how to quit (101).

### 51 ***Perceived cognitive benefits of smoking***

52  
53 Enhanced concentration and other cognitive benefits associated with smoking were reported  
54 in six studies (51, 83, 90, 93-95), including 56% of individuals with a substance use disorder  
55 (101).

### 58 ***Combatting loneliness***

59  
60 Smoking provided a way of reducing loneliness in six studies (52, 59, 65, 93, 97, 98);  
providing companionship (93) and was described as a friend (52, 98) by participants.

### ***Perceived low individual risk of harm***

Whilst most of the studies reported that participants had good knowledge of the health risks associated with smoking, low levels of knowledge about the risks of smoking were identified as barriers to cessation (58, 87, 95, 97) including one study conducted with pregnant women (58) and two studies conducted with Indigenous Australian pregnant women (80, 87). Low knowledge of the risks of smoking whilst pregnant were also identified (58, 87). In a study conducted with former miners, participants were more likely to attribute their current health issues to coal dust exposure, rather than smoking. Additionally, participants rationalised continuing smoking by weighing the risks of smoking in comparison to the risks of coal mining (71).

### ***Low motivation***

Low levels of motivation to quit smoking were reported in four studies, all of which were carried out with participants who were diagnosed with a mental illness (92, 94, 97, 98). Additionally, 38% of individuals from a low income areas (70) and 47% of individuals diagnosed with a substance use disorder (101) also reported low levels of motivation to quit.

### ***Failed past quit attempts***

Past failed attempts to quit smoking were identified as barriers to future attempts in two qualitative studies (61, 74) as was a sense of hopelessness after trying many methods and remaining unsuccessful (87).

### ***Positive smoker image***

Two studies within low income samples reported associations between smoking and perceptions of being cool and sophisticated (29, 57) and one study with persons with a mental illness found that participants believed that non-smokers do not have as much fun as smokers (97). In a sample of young people with mental illness, positive media images were also reported as barriers to quitting (103).

### **Social and community networks**

#### ***High prevalence and acceptability of smoking in community***

Eight qualitative (53, 54, 69, 75, 79, 80, 98, 111) and four quantitative (60, 101, 107, 109) studies found that being around other smokers was a barrier to quitting. This finding is compounded by participants describing the high prevalence of smoking amongst family and friends in 23 studies (29, 51, 52, 56, 62, 68, 69, 72, 74, 76, 81, 83, 85-87, 90, 93, 95, 96, 103, 105, 111, 112) and in the wider community in 18 studies (29, 51, 52, 56, 62, 66, 69, 72, 74, 76, 81, 83, 85-87, 93, 96, 112). Tobacco was readily available and easily accessible within disadvantaged communities (51, 62, 66, 76, 83, 90, 91, 111) and smoking was considered to

1  
2  
3 be a highly acceptable (29, 79, 81-83, 85-87) and normalised behaviour (52, 56, 62, 66, 69,  
4 79, 81-83, 85, 87).

### 7 ***Lack of social support***

8  
9 A lack of social support to quit smoking was reported in 12 studies (29, 56, 58, 64, 67, 68,  
10 75, 79, 84, 98, 107, 108) and a lack of support from family and friends in particular was a  
11 barrier in 14 qualitative studies (49, 54, 55, 58, 69, 74, 75, 77, 79, 83, 84, 87, 91, 94). In one  
12 quantitative study, only 21% of homeless individuals agreed that close friends or family  
13 would be helpful in quitting smoking and only 29% believed that close friends and family  
14 wanted them to quit very much (106). Similarly, 26% of homeless respondents cited a lack of  
15 support during a quit attempt as a barrier to successfully quit (107).

### 21 ***Smoking as a social activity***

22  
23 Tobacco use and socialising were linked in two quantitative studies (88, 100) and 20  
24 qualitative studies (29, 49, 53, 57, 62, 73-75, 79, 80, 85, 87, 89, 90, 92, 93, 95, 97, 98, 103):  
25 where participants reported that using tobacco helped to facilitate social connections amongst  
26 family, friends and strangers.

### 30 ***Lack of health and other professional support to quit***

31  
32 Thirteen qualitative studies (52, 55, 56, 58, 74, 77, 83, 86, 91, 92, 95, 108, 112) and one  
33 quantitative study (109) reported a perceived lack of support from health professionals  
34 regarding smoking cessation. Cases of family members and health professionals actively  
35 discouraging quit attempts and encouraging maintenance of smoking due to concerns about  
36 the individual's mental health (92, 93, 95, 96, 112) or because smoking was perceived to be  
37 the individual's only source of enjoyment (54, 77, 79, 83) were reported. Three studies  
38 identified tobacco use by health professionals and others involved in the participants' care as  
39 a barrier to cessation (77, 95, 109) and one study reported service staff providing cigarettes to  
40 homeless clients as a barrier (112). Over half (55.9%) of prisoners surveyed reported  
41 observing members of staff smoking as a barrier to quitting (109). Participants also reported  
42 that cigarettes were used as a way to reward or punish behaviour by health professionals and  
43 other service providers (93, 95, 96, 110). Twenty-nine percent of prisoners also indicated  
44 that not receiving cessation support from prison staff prevented them from quitting smoking  
45 (109). Twenty-six percent of substance abusing individuals reported they did not have  
46 enough support to quit. The study involving at risk youth identified mixed messages sent by  
47 those in places of authority (for example teachers, members of the police force) also acted as  
48 a barrier for at risk youth (111).

## **Living and working conditions**

### ***Access to resources to quit***

Thirteen studies cited the cost of Nicotine Replacement Therapy (NRT) and other pharmacological interventions as a barrier to access that directly prevented cessation (52, 55, 61, 68, 69, 73, 74, 78, 81, 93, 96, 98, 108). Cost was also a barrier for 40% of participants diagnosed with substance abuse disorder (101). There was also poor knowledge and low uptake of programs available to participants (52, 56, 61-63, 72, 74, 78, 86, 96, 108, 110). Social and geographical isolation were reported in four studies as barriers to quitting (56, 62, 64, 85). Geographical isolation referred to the lack of access to cessation services that rural and remote communities experience. Social isolation referred to the racial and economic segregation that separates disadvantaged neighbourhoods and individuals from others (56) further contributing to differences in perceived acceptability and prevalence of tobacco use (62, 85). Unsafe neighbourhoods also limited unnecessary outings and inhibited accessing smoking cessation support (56).

### ***Boredom and limited structure in day to day life***

Fourteen qualitative studies (50-52, 54, 55, 65, 75, 86, 94, 95, 97, 99, 108, 110) and four quantitative studies (60, 79, 88, 90) indicated that smoking alleviated boredom. Limited opportunities for leisure and high levels of unemployment often meant that participants had large amounts of free time and smoking was used to mark the transition from one task or part of the day to another (56, 59, 93, 97, 102, 108).

### ***Concerns regarding cessation treatment and services***

Ten qualitative studies reported that participants were reluctant to access psychological or pharmacological resources to quit smoking due to a belief that these treatments were largely ineffective (56, 58, 61-63, 69, 72, 80, 81, 97). In one survey almost a third (31%) of homeless participants reported that no existing pharmacological treatments would be able to help them stop smoking (107).

The possible side effects of pharmacological interventions (50, 73, 78, 81, 105, 108), uncertainty about the correct use of pharmacological interventions (52, 81, 108); or the possible interactions between NRT and other medications (108) presented barriers to cessation. Participants in one study reported reluctance to add NRT on top of the medications they were already using (105). Homeless participants in one study expressed concerns about the possibility of becoming addicted to NRT (108). Concerns about existing treatment services included lack of continuity of care(91); being capable of addressing smoking simultaneously with mental health issues (91, 93, 96); cultural appropriateness (74, 77, 78,



1  
2  
3 86); feeling judged by programs (61, 67, 91, 93) and a cynicism regarding the medical  
4 profession (77). Telephone quitlines were not viewed as culturally appropriate resources (77)  
5 and participants were sceptical of the effectiveness of quitline support (52).  
6  
7

### 8 *Stressful factors*

9  
10 Participants across ten studies (56, 58, 59, 62, 63, 65, 68, 74, 75, 85) reported that increased  
11 stress due to the events and life circumstances intrinsically linked to their socioeconomic  
12 position were barriers to quitting smoking. The following situations compounded feelings of  
13 stress, hopelessness and meant that cessation was not prioritised: unemployment (56, 58, 59,  
14 62, 63, 65, 68, 85); poverty and financial stress (62, 65, 75, 85); housing issues including  
15 substandard housing, homelessness and overcrowding (56, 58, 75, 85); violence and crime  
16 (56, 62, 68, 75); drug use (56, 62, 75); increased morbidity and mortality (68, 74, 75, 85);  
17 chronic disease (74, 75); low education (65, 75); and limited recreational activities (62, 65).  
18  
19

20  
21 Two studies carried out with Indigenous Australians found that additional stressors  
22 experienced by this group included racism, stigma, dispossession of traditional lands, high  
23 burden of illness, premature deaths within the community and collective grief and loss  
24 relating to the Stolen Generation and the removal of children (74, 75, 85). Unique stressors  
25 facing prisoners including; transfers within and across prisons; legal matters; bullying;  
26 missing family; and restricted movement for most of the day were also identified (110).  
27  
28

### 29 *Living and working environments*

30  
31 Participants reported lack of control over exposure to smoking due to others smoking in the  
32 home; a lack of smoke free policies or policies that did not cover the whole environment or  
33 were only partially enforced were barriers to quitting smoking (54, 58, 74, 96, 103, 107). In  
34 one study involving prisoners, 59% of participants reported that the 'smoky atmosphere'  
35 within the prison was a barrier to quitting (109). Work environments that were conducive to  
36 smoking also presented a barrier in one study (29).  
37  
38

### 39 **Cultural, socioeconomic and environmental factors**

#### 40 *Cultural norms*

41  
42 The importance of tobacco use in traditional and ceremonial contexts was expressed in three  
43 studies concerning American Indian participants (72, 73, 82) and one study including  
44 Aboriginal and Torres Strait Islander participants (85) and one study including Alaska Native  
45 participants (86). Cultural values of self-reliance, pride and independence prevented  
46 American Indian participants from seeking cessation support in two studies (81, 82) and in  
47 one study with low income African Americans (56). Historical factors including  
48 dispossession of land, colonisation and collective grief and loss of cultural identity were  
49  
50  
51  
52  
53  
54  
55  
56  
57  
58  
59  
60

1  
2  
3 reported as barriers to cessation in three studies of Aboriginal and Torres Strait Islanders (74,  
4 75, 85). Studies carried out with American Indian participants (73, 82) and Aboriginal and  
5 Torres Strait Islanders (74, 75, 83, 85) highlighted the function of smoking as a way of  
6 maintaining cultural identity and belonging. Maintenance of identity and belonging were also  
7 reported in three studies concerning people with a mental illness (93, 94, 98) and one study  
8 carried out with low income participants in the UK (62). In prison settings, use of cigarettes  
9 as a substitute currency also provided a barrier to cessation (110).

### 16 *Socioeconomic factors*

17 Two qualitative studies reported participants linking their status as smokers and their inability  
18 to quit smoking with their lower socioeconomic position (65, 97). In a study conducted with  
19 people with a mental illness, participants endorsed the belief that non-smokers were able to  
20 refrain from becoming smokers because they were more advantaged (97) and in a study of  
21 low income women, participants referred to their low socioeconomic position and poverty as  
22 a barrier to quitting smoking (65).  
23  
24  
25  
26  
27  
28  
29  
30  
31  
32  
33  
34  
35  
36  
37  
38  
39  
40  
41  
42  
43  
44  
45  
46  
47  
48  
49  
50  
51  
52  
53  
54  
55  
56  
57  
58  
59  
60

# BMJ Open

## Perceived barriers to smoking cessation in selected vulnerable groups: A systematic review of the qualitative and quantitative literature.

|                                 |                                                                                                                                                                                                                                                                                                                                                                                                                                                                                                                                                                                                |
|---------------------------------|------------------------------------------------------------------------------------------------------------------------------------------------------------------------------------------------------------------------------------------------------------------------------------------------------------------------------------------------------------------------------------------------------------------------------------------------------------------------------------------------------------------------------------------------------------------------------------------------|
| Journal:                        | <i>BMJ Open</i>                                                                                                                                                                                                                                                                                                                                                                                                                                                                                                                                                                                |
| Manuscript ID:                  | bmjopen-2014-006414.R2                                                                                                                                                                                                                                                                                                                                                                                                                                                                                                                                                                         |
| Article Type:                   | Research                                                                                                                                                                                                                                                                                                                                                                                                                                                                                                                                                                                       |
| Date Submitted by the Author:   | 20-Nov-2014                                                                                                                                                                                                                                                                                                                                                                                                                                                                                                                                                                                    |
| Complete List of Authors:       | <p>Twyman, Laura; University of Newcastle, School of Medicine and Public Health</p> <p>Bonevski, Billie; University of Newcastle, School of Medicine &amp; Public Health</p> <p>Paul, Chris; University of Newcastle, School of Medicine and Public Health; Hunter Medical Research Institute, Priority Research Centre for Health Behaviour and Health Behaviour Research Group</p> <p>Bryant, Jamie; University of Newcastle, School of Medicine and Public Health; Hunter Medical Research Institute, Priority Research Centre for Health Behaviour and Health Behaviour Research Group</p> |
| <b>Primary Subject Heading</b>: | Smoking and tobacco                                                                                                                                                                                                                                                                                                                                                                                                                                                                                                                                                                            |
| Secondary Subject Heading:      | Smoking and tobacco                                                                                                                                                                                                                                                                                                                                                                                                                                                                                                                                                                            |
| Keywords:                       | barriers, vulnerable populations, review, smoking cessation, disadvantage                                                                                                                                                                                                                                                                                                                                                                                                                                                                                                                      |
|                                 |                                                                                                                                                                                                                                                                                                                                                                                                                                                                                                                                                                                                |

SCHOLARONE™  
Manuscripts

Only

1  
2  
3 **Perceived barriers to smoking cessation in selected vulnerable groups: A systematic**  
4  
5 **review of the qualitative and quantitative literature.**  
6  
7

8  
9 **Twyman, Laura,<sup>1\*</sup> Bonevski, Billie,<sup>1</sup> Paul, Chris,<sup>2</sup> & Bryant, Jamie.<sup>2</sup>**

10  
11 **<sup>1</sup>School of Medicine and Public Health, Faculty of Health, University of Newcastle,**  
12  
13 **Callaghan, NSW 2308, Australia.**

14  
15 **<sup>2</sup> Priority Research Centre for Health Behaviour and Health Behaviour Research**  
16  
17 **Group, University of Newcastle & Hunter Medical Research Institute**  
18

19  
20 **\*Correspondence to: Laura Twyman. Email: [Laura.Twyman@newcastle.edu.au](mailto:Laura.Twyman@newcastle.edu.au)**

21  
22 **Contact address: Level 5 McAuley building Calvary Mater Hospital Waratah Postcode:**  
23  
24 **2298 New South Wales Australia**  
25

26  
27 **Keywords:** smoking cessation, vulnerable populations, disadvantage, barriers, systematic  
28  
29 review  
30

31  
32 **Word count:** 5720  
33  
34  
35  
36  
37  
38  
39  
40  
41  
42  
43  
44  
45  
46  
47  
48  
49  
50  
51  
52  
53  
54  
55  
56  
57  
58  
59  
60

## ABSTRACT

**Objectives:** To identify barriers which are common and unique to six selected vulnerable groups: low socioeconomic status; Indigenous; mental illness and substance abuse; homeless; prisoners and at-risk youth.

**Design:** A systematic review was carried out to identify the perceived barriers to smoking cessation within six vulnerable groups.

**Data sources:** Medline, EMBASE, CINAHL and PsycInfo were searched using keywords and MeSH terms from each database's inception published prior to March 2014.

**Study selection:** Studies that provided either qualitative or quantitative (i.e. longitudinal, cross-sectional or cohort surveys) descriptions of self-reported perceived barriers to quitting smoking in one of the six aforementioned vulnerable groups were included.

**Data extraction:** Two authors independently assessed studies for inclusion and extracted data.

**Results:** 65 eligible papers were identified: 24 with low socioeconomic groups, 16 with Indigenous groups, 18 involving people with a mental illness, three with homeless groups, two involving prisoners and one involving at risk youth. One study identified was carried out with participants who were homeless and addicted to alcohol and/or other drugs. Barriers common to all vulnerable groups included: smoking for stress management, lack of support from health and other service providers and the high prevalence and acceptability of smoking in vulnerable communities. Unique barriers were identified for people with a mental illness (e.g. maintenance of mental health), Indigenous groups (e.g. cultural and historical norms), prisoners (e.g. living conditions), people who are homeless (e.g. competing priorities) and at risk youth (e.g. high accessibility of tobacco).

**Conclusions:** Vulnerable groups experience common barriers to smoking cessation, in addition to barriers that are unique to specific vulnerable groups. Individual-level and

1  
2  
3 community and social network-level interventions are priority areas for future smoking  
4  
5 cessation interventions within vulnerable groups.  
6

7 **Trial registration:** A protocol for this review has been registered with PROSPERO  
8  
9 International Prospective Register of Systematic Reviews [Identifier: CRD42013005761].  
10  
11

12  
13  
14 **298**

15  
16  
17  
18 Strengths:

- 19  
20
- 21 • This study provides a valuable synthesis of the literature examining the perceived  
22 barriers to smoking cessation common and unique across six vulnerable groups.  
23

24  
25 Limitations:

- 26  
27
- 28 • While the overall quality of the studies included in this review was acceptable, most  
29 studies failed to provide information regarding the trustworthiness (qualitative  
30 studies) or reliability and validity (quantitative studies) of the research.  
31  
32
- 33  
34  
35  
36  
37  
38  
39  
40  
41  
42  
43  
44  
45  
46  
47  
48  
49  
50  
51  
52  
53  
54  
55  
56  
57  
58  
59  
60

## INTRODUCTION

Tobacco use is the leading global cause of avoidable death worldwide (1) and a key modifiable risk factor for the development of a range of diseases, including cardiovascular disease, chronic obstructive pulmonary disease, and some cancers (1).

The prevalence of tobacco smoking is inversely related to socioeconomic position (SEP) in high-income countries (1). For example, in 2010 in Australia, the prevalence of smoking was 24.6% in the lowest socioeconomic areas compared to 12.5% in the highest socioeconomic areas (2). The highest rates of smoking are evident among those who, in addition to low socioeconomic status, have other characteristics that distinguish them from the general population such as Indigenous groups (31% - 51.8%) (3-5); people with a mental illness (31.7-32.4%) (6), those with substance abuse disorders (77%) (7); the homeless (73%) (8); and prisoners (78% - 84%) (9, 10). These groups were selected because they represent a large proportion of those classified as vulnerable to socioeconomic disadvantage (11). It should be noted that although members of vulnerable groups are more likely to be socioeconomically disadvantaged, not all members are. For the purposes of this review, vulnerable groups are defined as groups that are more likely to experience social and material disadvantage due to lower income, cultural differences, and social exclusion (12).

Conflicting evidence exists regarding whether the rates of quit attempts in low SEP are similar to (13, 14) or lower (15-18) than the rates made by smokers in higher SEP. However, the success rate of quit attempts for lower SEP individuals is much lower than the success rate in higher SEP counterparts (14, 19).

There are many reasons quit success may be lower in vulnerable groups(20, 21). Within the health behaviour literature, factors that prevent an individual from undertaking health behaviour change have been referred to as barriers. Barriers are often conceptualised as either structural or individual psychosocial factors (22). Structural barriers include

1  
2  
3 systems, organisations and the relationship between systems and individuals, for example  
4  
5 lack of accessible smoking cessation programs. Individual barriers refer to the subjective  
6  
7 experience of the individual, for example physical addiction to nicotine.  
8

9  
10 This definition of barriers is congruent with the social determinants of health  
11  
12 framework (SDHF)(23). The SDHF holds that an individual's health is influenced by factors  
13  
14 across many levels, from individual genetic and physical characteristics, social and  
15  
16 community networks, to broader influences of culture, socioeconomic determinants and the  
17  
18 environment. This framework has been used to examine the determinants of health  
19  
20 inequities(24). Because the SDHF classifies determinants of health as individual, social and  
21  
22 broader cultural and environmental factors, it also allows the identification of distinct levels  
23  
24 of intervention for health policies.  
25  
26

27  
28 Within the general population, cross-sectional studies have found variation in the  
29  
30 most commonly reported barriers to cessation. Enjoyment (79%)(25); cravings (75%) (25);  
31  
32 and stress management (36% - 63%) (25, 26) are the most frequently reported barriers.  
33  
34 Irritability (39% - 42%) (27); habit (39%) (26); withdrawal symptoms (28% - 48%) (25, 26);  
35  
36 fear of failure (17% - 32%) (25, 26) and concern about weight gain (27%-34%) (25-27) are  
37  
38 also identified as barriers to cessation.  
39

40  
41 The effect of socioeconomic position on perceived barriers to quitting was examined  
42  
43 in a representative sample (n = 2,133) in the United Kingdom (28). Enjoyment (51%) and  
44  
45 stress relief (47%) were the most frequently endorsed motives for continuing to smoke across  
46  
47 the sample; however as socioeconomic position decreased, the likelihood of reporting stress  
48  
49 management and avoiding boredom as motives to continue to smoke increased. This  
50  
51 suggests that smokers from vulnerable groups may experience barriers to smoking cessation  
52  
53 differently than those in the general population (28).  
54  
55  
56  
57  
58  
59  
60



1  
2  
3 Smoking in vulnerable groups is known to be influenced and perpetuated by a  
4 complex range of social, cultural and environmental factors (29) including high acceptability  
5 of smoking (30) and more tobacco retail outlets in low socioeconomic areas (31). Two  
6 previous studies have reviewed the literature to examine barriers to quitting smoking amongst  
7 vulnerable groups. One focussed on Aboriginal pregnant women (32), and one focussed on  
8 the barriers to smoking cessation service utilisation amongst low income smokers (33). Both  
9 reviews found pro-smoking social norms, inadequate knowledge regarding smoking related  
10 risks, and lack of access to appropriate cessation services inhibited participants' ability to  
11 quit.  
12  
13

14  
15 As the term vulnerable applies to multiple discrete groups, it is important to  
16 understand which barriers (if any) are unique for example, cultural factors that inhibit  
17 smoking cessation may be unique to some Indigenous groups (32). A systematic examination  
18 of potential unique barriers would be valuable in order to develop and deliver appropriate  
19 suites of intervention techniques for specific vulnerable groups.  
20  
21

22  
23 Understanding the perceived barriers to quitting is important in order to better  
24 understand smoking, relapse and quitting related behaviours, to inform appropriate policy,  
25 and facilitate the development of effective tailored smoking cessation interventions. Given  
26 the exceptionally high smoking rates and low quit success amongst vulnerable groups, there  
27 is a critical need for a systematic and comprehensive review of the literature of the perceived  
28 barriers to quitting smoking amongst vulnerable smokers.  
29  
30  
31  
32  
33

### 34 35 36 37 38 39 40 41 42 43 44 45 46 47 48 49 **Aims**

50  
51 This systematic review aims to provide a comprehensive synthesis of the self-reported  
52 barriers to quitting smoking within six vulnerable groups by reviewing the qualitative and  
53 quantitative literature. The review will focus on the perceived, self-reported barriers to  
54  
55  
56  
57  
58  
59  
60

1  
2  
3 smoking cessation in six selected vulnerable groups: low socioeconomic status (low SES),  
4  
5 Indigenous, mental illness and substance abuse, homeless, prisoners, and at-risk youth. These  
6  
7 groups were selected because they represent a large proportion of those classified as  
8  
9 vulnerable to socioeconomic disadvantage (11); who exhibit smoking rates higher than that of  
10  
11 the general population (2-10); and who are identified as priority groups targeted for smoking  
12  
13 cessation programs and policies by peak health authorities (34-36). Specifically, the review  
14  
15 aims to:  
16  
17

- 18  
19  
20 a) identify barriers which are common across all vulnerable groups included in the review  
21  
22 and  
23  
24 b) identify barriers that may be unique to specific groups.  
25  
26  
27  
28

29  
30 The results of the review will be used to develop a practical model to help understand the  
31  
32 barriers to quitting amongst vulnerable groups and to aid smoking cessation intervention  
33  
34 development.  
35  
36  
37

## 38 **METHOD**

### 39 **Study design**

40  
41  
42 Guidelines for the reporting of systematic reviews (PRISMA) (37) and qualitative  
43  
44 synthesis (ENTREQ) (38) were followed. A protocol for this review was registered with  
45  
46 PROSPERO International Prospective Register of Systematic Reviews [Identifier:  
47  
48 CRD42013005761].  
49  
50  
51  
52  
53  
54  
55  
56  
57  
58  
59  
60

## Databases and search

Medline, EMBASE, CINAHL and PsycInfo were searched using keywords and MeSH terms from each database's inception published prior to March 2014. The reference lists of key articles and reviews were also manually searched in order to identify any other relevant articles. An extensive list of search terms was used in order to ensure that as many relevant articles as possible were captured (See Table 1).

Table 1. Search strategy

|    |                               |
|----|-------------------------------|
| 1  | Tobacco/                      |
| 2  | Tobacco use/                  |
| 3  | Tobacco use cessation/        |
| 4  | Tobacco smoking/              |
| 5  | Smoking/                      |
| 6  | Smoking Cessation/            |
| 7  | Tobacco use cessation/        |
| 8  | Tobacco dependence/           |
| 9  | Cigarette smoking/            |
| 10 | Or/1-9                        |
| 11 | Homeless youth/               |
| 12 | Homeless persons/             |
| 13 | Housing/                      |
| 14 | Homeless mentally ill/        |
| 15 | Homelessness or homeless/     |
| 16 | Community programs/           |
| 17 | Or/11-16                      |
| 18 | Prisoner or Prisons/          |
| 19 | Correctional Health Services/ |
| 20 | Correctional facilities/      |
| 21 | Jail/                         |
| 22 | Or/18-21                      |
| 23 | Anxiety/                      |
| 24 | Depression/                   |
| 25 | Schizophrenia/                |
| 26 | Mentally Ill persons/         |
| 27 | Mental health/                |
| 28 | Mental illness/               |
| 29 | Mental disorder/              |
| 30 | Mental disease/               |
| 31 | Mental patient/               |
| 32 | Mental health services/       |
| 33 | Substance-related disorders/  |
| 34 | Drug use/                     |
| 35 | Drug abuse/                   |
| 36 | Alcohol-related disorders/    |
| 37 | Or/23-36                      |

1  
2  
3  
4  
5  
6  
7  
8  
9  
10  
11  
12  
13  
14  
15  
16  
17  
18  
19  
20  
21  
22  
23  
24  
25  
26  
27  
28  
29  
30  
31  
32  
33  
34  
35  
36  
37  
38  
39  
40  
41  
42  
43  
44  
45  
46  
47  
48  
49  
50  
51  
52  
53  
54  
55  
56  
57  
58  
59  
60

---

|    |                                                                                     |
|----|-------------------------------------------------------------------------------------|
| 38 | Adolescent behaviour/                                                               |
| 39 | Juvenile delinquency/                                                               |
| 40 | Juvenile offenders/                                                                 |
| 41 | Disruptive Behaviors or disruptive behaviours/                                      |
| 42 | At-risk youth/                                                                      |
| 43 | At-risk young people/                                                               |
| 44 | Or/38-43                                                                            |
| 45 | Indigenous/                                                                         |
| 46 | Indigenous health/                                                                  |
| 47 | Indigenous peoples/                                                                 |
| 48 | Indigenous populations/                                                             |
| 49 | Aboriginal/                                                                         |
| 50 | Aboriginal and Torres Strait Islanders/                                             |
| 51 | Inuits/                                                                             |
| 52 | Eskimo/                                                                             |
| 53 | Alaska Native/                                                                      |
| 54 | Indians/                                                                            |
| 55 | Native American/                                                                    |
| 56 | Native Hawaiian/                                                                    |
| 57 | American Indian/                                                                    |
| 58 | Indians, North American/                                                            |
| 59 | Indians, South American/                                                            |
| 60 | Indians, Central American/                                                          |
| 61 | First Nations/                                                                      |
| 62 | Pacific Islander/                                                                   |
| 63 | Maori/                                                                              |
| 64 | Oceanic ancestry group/                                                             |
| 65 | American Native Continental Ancestry Group/                                         |
| 66 | Or/45-65                                                                            |
| 67 | Poverty                                                                             |
| 68 | Social status                                                                       |
| 69 | Social class                                                                        |
| 70 | Low income population                                                               |
| 71 | Inequalities                                                                        |
| 72 | Socioeconomic status                                                                |
| 73 | Socioeconomic factors                                                               |
| 74 | Disadvantaged                                                                       |
| 75 | Underserved                                                                         |
| 76 | Or/67-75                                                                            |
| 77 | Related to smoking cessation/quitting smoking                                       |
| 78 | Correlated with smoking cessation/quitting smoking                                  |
| 79 | Associated with smoking cessation/quitting smoking                                  |
| 80 | That affect smoking cessation/quitting smoking                                      |
| 81 | That inhibit smoking cessation/quitting smoking                                     |
| 82 | That prevent smoking cessation/quitting smoking                                     |
| 83 | Barriers to smoking cessation/quitting smoking                                      |
| 84 | Factor\$ or Determinant\$ or Variable\$ or Covariable\$ or Predictor\$ or Barrier\$ |
| 85 | Or/77-84                                                                            |
| 86 | 10 AND 85 AND 17                                                                    |
| 87 | 10 AND 85 AND 22                                                                    |
| 88 | 10 AND 85 AND 37                                                                    |
| 89 | 10 AND 85 AND 44                                                                    |

---

|    |                  |
|----|------------------|
| 90 | 10 AND 85 AND 66 |
| 91 | 10 AND 85 AND 76 |

### Inclusion and exclusion criteria

Studies that provided either qualitative or quantitative (i.e. longitudinal, cross-sectional or cohort surveys) descriptions of perceived self-reported barriers to quitting smoking in low SES groups, Indigenous groups, people with a mental illness or substance abuse problems, people who are homeless, prisoners or at-risk youth were included. See Table 2 for definitions used as inclusion criteria for each vulnerable group. Only studies carried out in high income countries were included as middle and low income countries may present different contextual, political and economic barriers which require separate consideration. Only studies published in English were included as resources required to translate articles were beyond the scope of this review. Intervention studies were excluded, as barriers discussed within these studies related to use of the intervention being tested and not barriers to smoking cessation per se. Studies examining factors associated with quit attempts or success were excluded unless they included results on the perceived barriers self-reported by participants from vulnerable groups. Studies describing *provider* reports of the barriers to the provision of smoking cessation support or treatment, and unpublished grey literature, were also excluded. There were no cut offs for sample size.

Table 2. Inclusion criteria definitions of each group.

| Group                          | Definition                                                                                                                                                                                                                                                                                                                        |
|--------------------------------|-----------------------------------------------------------------------------------------------------------------------------------------------------------------------------------------------------------------------------------------------------------------------------------------------------------------------------------|
| Low socioeconomic status (SES) | Because definitions of low SES vary across high income countries this study used an inclusive definition of low SES. Studies were included if they described participants as being low SES and gave at least one measure of SES. This measure could be income (above/below poverty level); address in deprived neighbourhood etc. |
| Indigenous groups              | The following definition was used to define potential Indigenous studies in accordance with previous studies (39): “the experiences shared by a group of people who have inhabited a country for thousands of years, which often contrast with those of other groups residing in the same country for a few hundred years” (40).  |
| Mental Illness                 | People with a mental illness were defined as individuals who had been diagnosed with a mental illness, severe mental illness or were described as inpatients or outpatients in a mental health rehabilitation facility. Substance use disorders were also included. All mental illnesses were included.                           |
| At-risk youth                  | At-risk youth were defined as individuals under the age of 21 who have experienced or are experiencing; problems at school; physical, sexual or psychological abuse; mental or physical health problems; economic disadvantage or who have committed a violent or delinquent act (USA Code).                                      |
| Prisoners                      | Prisoners included both those currently incarcerated and those ex-prisoners living in the community.                                                                                                                                                                                                                              |
| Homeless                       | Homeless individuals were defined as those individuals described as meeting national criteria for homelessness or those individuals accessing services provided to homeless persons.                                                                                                                                              |
| Smoker                         | Smokers were defined as self-reported daily or occasional cigarette smokers. Studies that also assessed ex-smokers were only included if the majority of participants were current smokers, or if the results were reported by smoking status. Studies were excluded if they focussed solely on ex-smokers or non-smokers.        |

### Data extraction

1  
2  
3 The titles and abstracts of retrieved publications were assessed by one reviewer (LT)  
4 against eligibility criteria and excluded if they did not meet inclusion criteria. A second  
5 reviewer (a Research Assistant) independently assessed 20% of the returned abstracts for  
6 inclusion with 100% agreement between reviewers. Data from included journal articles was  
7 extracted into summary tables independently by one reviewer (LT) and a random 20%  
8 checked by a second (Research Assistant). Agreement was again high (97%). Discrepancies  
9 were settled by discussion between the reviewers. Data extracted from the articles included:  
10 study aims, setting, sample characteristics, response rates, study methodology, data analysis  
11 and the barriers identified. Barriers were defined as factors that prevented smoking cessation  
12 and/or quit attempts or were reported as primary reasons for continuing to smoke.  
13  
14  
15  
16  
17  
18  
19  
20  
21  
22  
23  
24  
25  
26

### 27 **Risk of bias in individual studies**

28  
29 Quality assessment was performed independently by all authors, with two reviewers  
30 per manuscript. The methodological quality of qualitative studies was assessed using the  
31 McMaster Qualitative Criteria Form (41). Quantitative studies were assessed using a tool  
32 adapted from the STROBE statement (42). As there is a lack of an agreed, valid and reliable  
33 measure to assess the quality of mixed methods studies (43), both the McMaster guidelines  
34 and the adapted quantitative framework were applied to the corresponding qualitative and  
35 quantitative components of any mixed methods studies identified.  
36  
37  
38  
39  
40  
41  
42  
43  
44  
45  
46

### 47 **Synthesis of results**

48  
49 Results were synthesised by vulnerable group using narrative synthesis and inductive  
50 data analysis techniques. Narrative synthesis allows the examination of studies that are highly  
51 heterogeneous in their research questions, samples and methods (44, 45). In order to avoid  
52 potential biases, care was taken to also identify points of difference between studies (46).  
53  
54  
55  
56  
57  
58  
59  
60

1  
2  
3 Where a barrier was reported in more than one study, this was recorded. In quantitative  
4 studies, the proportion of respondents reporting each barrier was calculated. Barriers were  
5 combined into categories and then classified using the SDHF (23). For the purposes of this  
6 review, individual factors were defined as physical or psychological barriers to quitting  
7 smoking: for example, the individual's level of nicotine dependence or motivation to quit.  
8 Lifestyle factors were defined as health behaviours (including alcohol and other drug use)  
9 that impeded an individual's ability to quit. Social and community networks were defined as  
10 the impact of an individual's family and friend networks, and the wider community. Living  
11 and working conditions encompassed factors including housing, health care, education and  
12 employment. The final domain was the broader socioeconomic, cultural and environmental  
13 background perceived to influence smoking cessation.  
14  
15  
16  
17  
18  
19  
20  
21  
22  
23  
24  
25  
26  
27  
28  
29

## 30 RESULTS

### 31 Search results

32 After duplicates were removed, 21,767 studies were identified from electronic  
33 searches and a further 27 from manual searches. Of those, 65 studies met inclusion criteria  
34 and were included in the review (see Figure 1). Supplementary file 1 contains a list of full  
35 text articles that were retrieved, reviewed and excluded as per the inclusion criteria. Two  
36 systematic reviews concerning Indigenous Australian pregnant women (32) and pregnant  
37 women (47); and two critical reviews providing summaries of the barriers to quitting (33, 48)  
38 were also identified from hand searches.  
39  
40  
41  
42  
43  
44  
45  
46  
47  
48  
49  
50  
51

### 52 Study characteristics

53 The majority of studies (n = 24) identified barriers to smoking cessation in low SES groups  
54 (30, 49-71), Indigenous groups (n = 16) (72-87), and people with a mental illness (n = 18)  
55  
56  
57  
58  
59  
60



1  
2  
3 (88-105) including two concerning those with substance use disorders (101, 104). Three  
4  
5 studies reported barriers to quitting within the homeless (106-108) and two reported barriers  
6  
7 within prisoner groups (109, 110). One study with at-risk youth was identified (111). Two  
8  
9 other studies concerning Alaska Native participants (age range from 11 to 18) (86) and  
10  
11 people with a mental illness (age range from 16 to 23) (103) included younger people as  
12  
13 participants. One study was identified that was carried out with participants who were both  
14  
15 homeless and addicted to drugs and/or alcohol (112). Since the study comprised participants  
16  
17 that met criteria for inclusion in two of the vulnerable groups included in this review (both  
18  
19 the homeless and mental illness/substance use groups) this study was included in a seventh  
20  
21 category containing “multiple” participant groups. Supplementary files 2, 3 and 4 summarize  
22  
23 the included quantitative, qualitative and mixed methods studies respectively. An overview of  
24  
25 the characteristics of included studies can be found in Supplementary file 5.  
26  
27  
28  
29  
30  
31

### 32 **Quality assessment of qualitative studies**

33  
34 The results of the quality assessment of qualitative studies are presented in  
35  
36 Supplementary file 6. Overall, the quality of studies varied widely. The majority of studies  
37  
38 did not explicitly state their study design (n = 38); of those that did, most used Grounded  
39  
40 Theory (57, 59, 61, 93, 98, 99). Most studies provided adequate descriptions of the study  
41  
42 sites; participants; data collection methods and analysis techniques. Studies generally  
43  
44 performed poorly when assessed on four components of trustworthiness, with only fifteen  
45  
46 studies meeting all four criteria (credibility; transferability; dependability and confirmability)  
47  
48 [41,44,48,50,58,60,64,65,68,69,72,73,75,76,84]. It should be noted that none of the mixed  
49  
50 methods studies explicitly described their methodology as mixed methods nor did they report  
51  
52 integrating the qualitative and quantitative findings in a systematic way.  
53  
54  
55  
56  
57  
58  
59  
60

### Quality assessment of quantitative studies

The results of the quality assessment of quantitative studies are presented in Supplementary file 7. Sample sizes in the quantitative studies ranged from 36 to 500 participants. Response rates ranged from 42% to over 97% (three studies did not provide response rates) [70,91,92]. All but one study [81] clearly stated eligibility criteria. All studies stated their outcome a priori and no conflicts of interest were identified. The validity and reliability of survey measures used to assess barriers to cessation were reported in one study [53]. Three studies employed techniques such as pilot testing and input from key stakeholders in developing the tools used [53,77,95].

### Perceived barriers to smoking cessation

The barriers to quitting smoking endorsed over multiple studies included: smoking for stress management; enjoyment of smoking; addiction to nicotine; habit; social acceptability of smoking; lack of support to quit and access to quit resources; boredom; stressful life factors; pro-smoking living environments; smoking cultural norms and socioeconomic disadvantage. Figure 2 demonstrates the barriers reported in this review categorised by the SDHF. For brevity, the current results section will focus on those barriers that were common across all groups and unique to certain vulnerable groups. Supplementary file 8 provides a detailed description of all of the barriers identified in this review. Table 3 provides a summary of the barriers extracted from the qualitative studies. References of studies that report one or more barriers at a given level of the SDHF are included in Table 3. Table 4 provides a summary of the results of quantitative studies including the proportion of participants endorsing the barrier and the study reference.

### Barriers common across all groups

1  
2  
3 Three barriers were present in all six vulnerable groups included in this review: 1)  
4 stress management, 2) lack of support to quit from health professionals and other service  
5 providers, and 3) high prevalence and acceptability of smoking within vulnerable  
6 communities.  
7  
8  
9  
10

11 Within the SDHF, stress management was categorised as an individual level barrier.  
12  
13 Forty qualitative studies identified stress management as a significant barrier to smoking  
14 cessation (50-56, 58, 59, 61-63, 65, 67-69, 72, 74, 75, 80, 81, 83, 84, 86, 87, 89, 90, 92, 93,  
15 95-97, 99, 100, 103, 105, 108, 110-112). Smoking was used as a coping mechanism (52, 58,  
16 62-65, 69, 74, 89, 90, 92, 97, 99) in reaction to daily stressors as well as the stress inherent in  
17 vulnerable lives. Three quantitative studies reported stress management as a barrier to  
18 quitting with Maori participants (48%) (79), participants with substance use disorders (39%)  
19 (104) and homeless participants (44%) (107). Of note, participants in two studies reported  
20 that smoking also directly contributed to the stress experienced by participants (51, 111).  
21 Participants also reported using smoking to manage their emotions and mood (58, 65, 72, 83,  
22 84, 90, 93, 98, 103, 113). Twenty three percent of participants from a Maori sample indicated  
23 managing emotions was a barrier to quitting (79), 42% of individuals with a substance use  
24 disorder (101).  
25  
26  
27  
28  
29  
30  
31  
32  
33  
34  
35  
36  
37  
38  
39  
40

41 High prevalence and acceptability of smoking within vulnerable communities was  
42 categorised as a community and social network level barrier. Eight qualitative (53, 54, 69, 75,  
43 79, 80, 98, 111) and four quantitative (60, 101, 107, 109) studies found that being around  
44 other smokers was a barrier to quitting. This finding is reinforced by participants describing  
45 the high prevalence of smoking amongst family and friends in 22 studies (30, 51, 52, 56, 62,  
46 68, 69, 72, 74, 76, 81, 83, 85-87, 90, 93, 95, 96, 103, 111, 112) and in the wider community  
47 in 18 studies (30, 51, 52, 56, 62, 66, 69, 72, 74, 76, 81, 83, 85-87, 93, 96, 112). Tobacco was  
48 readily available and easily accessible within vulnerable communities (51, 62, 66, 76, 83, 90,  
49  
50  
51  
52  
53  
54  
55  
56  
57  
58  
59  
60

91, 111) and smoking was considered to be a highly acceptable (30, 79, 81-83, 85-87) and normalised behaviour (52, 56, 62, 66, 69, 79, 81-83, 85, 87).

Lack of support to quit from health and other service providers to quit was also categorised as a social and community network barrier. Other service providers include management and staff in prisons, homeless shelters and organisations, and members of the community. Thirteen qualitative studies (52, 55, 56, 58, 74, 77, 83, 86, 91, 92, 95, 108, 112) and one quantitative study (109) reported a perceived lack of support from health professionals regarding smoking cessation. Cases of family members and health professionals actively discouraging quit attempts and encouraging maintenance of smoking due to concerns about the individual's mental health (92, 93, 95, 96, 112) or because smoking was perceived to be the individual's only source of enjoyment (54, 77, 79, 83) were reported. Three studies identified tobacco use by health professionals and others involved in the participants' care as a barrier to cessation (77, 95, 109). Over half (55.9%) of prisoners surveyed reported observing members of staff smoking as a barrier to quitting (109). Studies involving people with a mental illness and prisoners identified use of cigarettes in order to reward or punish behaviour by health professionals and other service providers (93, 95, 96, 110) as a barrier to quitting. Twenty-nine percent of prisoners also indicated that not receiving cessation support from prison staff prevented them from quitting smoking (109). Twenty-six percent of substance abusing individuals reported they did not have enough support to quit. One study involving at risk youth identified smoking being unaddressed by teachers and members of the police force as a barrier to smoking cessation (111).

Table 3. A summary of the self-reported barriers to smoking cessation – qualitative and mixed methods studies by vulnerable group.

| Barrier                                 | Low SES groups (n = 22) | Indigenous groups (n = 16) | People with a mental illness (n=13) | Homeless groups (n = 3) | Prisoner groups (n = 2) | At risk youth (n = 1) | Multiple groups (n = 1) |
|-----------------------------------------|-------------------------|----------------------------|-------------------------------------|-------------------------|-------------------------|-----------------------|-------------------------|
| <b>Individual and lifestyle factors</b> |                         |                            |                                     |                         |                         |                       |                         |

|                                               |                                 |                                      |                              |       |       |       |       |
|-----------------------------------------------|---------------------------------|--------------------------------------|------------------------------|-------|-------|-------|-------|
| Stress management                             | (50-59, 61-63, 65-69)           | (72, 74, 75, 79, 81, 83, 84, 86, 87) | (89, 90, 92, 93, 95-98, 105) | (108) | (110) | (111) | (112) |
| Enjoyment                                     | (50, 54-56, 59, 62, 63, 65, 67) | (79, 81-83)                          | (89, 90, 92-94, 97, 98, 105) |       |       | (111) |       |
| Addiction                                     | (49, 50, 54, 57, 59, 67-69)     | (72, 74, 75, 81, 83, 84, 86)         | (90-92, 98)                  |       |       |       |       |
| Habit                                         | (50, 57, 65, 68)                | (75, 79, 83, 84)                     | (92, 105)                    |       |       |       |       |
| Mental health benefits                        | (58, 67)                        | (74)                                 | (89, 91-99)                  |       |       |       |       |
| Weight gain                                   | (30, 49, 52-54, 64, 67)         | (72, 74, 84)                         | (91, 98)                     |       |       |       |       |
| Competing priorities                          | (56, 63)                        | (74, 75, 87)                         | (89, 91, 98, 99)             | (108) |       |       |       |
| Rationalisations                              | (54-56, 58, 61, 67)             | (74, 78, 82, 87)                     | (89, 97)                     |       |       |       |       |
| Other substance use                           | (49, 56, 59, 62)                | (74, 76, 81, 84)                     | (89)                         |       |       |       | (112) |
| Autonomy                                      | (56, 58, 68)                    | (83)                                 | (93, 97-99)                  |       |       |       |       |
| Low confidence                                | (52, 53, 56, 63, 67, 69)        | (73, 84)                             | (92, 96, 98)                 |       |       |       | (112) |
| Cognitive benefits                            | (51)                            | (83)                                 | (93-95)                      |       |       |       |       |
| Loneliness                                    | (52, 59, 65)                    |                                      | (93, 97, 98)                 |       |       |       |       |
| Low risk of harm                              | (58)                            | (87)                                 | (95, 97)                     |       |       |       |       |
| Low motivation                                |                                 |                                      | (92, 94, 97, 98)             |       |       |       |       |
| Past failed attempts                          | (61)                            | (74)                                 |                              |       |       |       |       |
| Positive smoker image                         | (30, 57)                        |                                      | (97)                         |       |       |       |       |
| <b>Social and community networks</b>          |                                 |                                      |                              |       |       |       |       |
| Prevalence and acceptability                  | (30, 51-54, 56, 62, 66, 68, 69) | (72, 74, 76, 79, 83, 85-87)          | (90, 91, 93, 95, 96, 105)    | (108) | (110) | (111) | (112) |
| Lack of social support                        | (30, 49, 54-56, 58, 64, 67-69)  | (74, 75, 77, 79, 83, 84)             | (91, 94, 98)                 | (108) |       |       |       |
| Social activity                               | (30, 49, 53, 57, 62)            | (73-75, 79, 85, 87)                  | (89, 90, 92, 93, 95, 97, 98) |       |       |       |       |
| Lack of health and other professional support | (52, 54-56, 58)                 | (74, 77, 79, 83, 86)                 | (91-93, 95, 96)              | (108) | (110) | (111) | (112) |

| <b>Living and working conditions</b>                     |                              |                           |                      |       |       |
|----------------------------------------------------------|------------------------------|---------------------------|----------------------|-------|-------|
| Access to quit resources                                 | (52, 55, 56, 61-64)          | (72-74, 78, 81, 85, 86)   | (93, 96, 98)         | (108) | (110) |
| Boredom                                                  | (50-52, 54-56, 59, 65)       | (75, 86)                  | (90, 94, 95, 97, 99) | (108) | (110) |
| Concerns regarding treatment                             | (50, 52, 56, 58, 61-63, 69)  | (72-74, 77, 78, 81, 86)   | (91, 93, 96, 105)    | (108) |       |
| Stressful factors                                        | (56, 58, 59, 62, 63, 65, 68) | (74, 75, 85)              |                      |       | (110) |
| Living and working circumstances                         | (30, 54, 58)                 | (74)                      | (96)                 |       |       |
| <b>Cultural, socioeconomic and environmental factors</b> |                              |                           |                      |       |       |
| Cultural norms                                           | (56, 62)                     | (72-75, 78, 81-83, 85-87) | (93, 94, 98)         |       | (110) |
| Socioeconomic factors                                    | (65)                         |                           | (97)                 |       |       |

### **Barriers unique to certain vulnerable groups**

Indigenous; prisoner; mentally ill, homeless, and at risk youth reported unique barriers to smoking cessation. Racism, historical factors (74, 75, 85), ceremonial use of tobacco (72, 73, 82, 85, 86), cultural values that promote sharing, kinship, and reciprocity (83), cultural values of pride, independence and self-reliance that affect help seeking behaviour (81, 82), cultural values concerning health and privacy (84), and maintenance of cultural identity (73-75, 82, 83, 85) were identified as barriers within Indigenous groups. Smoking cessation could therefore exclude an individual from fully participating in their culture or potentially challenge family, personal or community relationships.

Living environments and the stressful context of prison presented unique barriers for prisoners, including social isolation, anxiety regarding legal matters, transfers to other prisons, use of cigarettes as a currency, use of cigarettes as a way to reward or punish behaviour, bullying, missing family and restricted movement throughout the day (110).

1  
2  
3 Low levels of motivation (92, 94, 97, 98), concerns about ability of cessation services  
4 to handle mental health issues (91, 93, 96), identity and belonging (93, 94, 98) and symptom  
5 management (88-98) were barriers for people with mental illness.  
6  
7

8  
9  
10 Competing needs and prioritising need to find shelter/place to live were unique  
11 barriers for individual who were homeless (108). Very high levels of accessibility of  
12 cigarettes, and the regular practice of selling cigarettes to those under 18 years of age were  
13 identified by one study with at risk youth as a unique barrier (104).  
14  
15  
16  
17  
18  
19  
20  
21  
22  
23  
24  
25  
26  
27  
28  
29  
30  
31  
32  
33  
34  
35  
36  
37  
38  
39  
40  
41  
42  
43  
44  
45  
46  
47  
48  
49

50 Table 4. A summary of the barriers to smoking cessation – reported prevalence of each barrier by  
51 vulnerable group for studies using quantitative and mixed methods<sup>ab</sup>.  
52

53  
54  
55  
56  
57  
58  
59  
60

| Barrier | Reported prevalence of each barrier N/Total N (%) |                           |                                      |                         |                         |
|---------|---------------------------------------------------|---------------------------|--------------------------------------|-------------------------|-------------------------|
|         | Low SES groups (n = 1)                            | Indigenous groups (n = 1) | People with a mental illness (n = 3) | Homeless groups (n = 2) | Prisoner groups (n = 1) |
|         |                                                   |                           |                                      |                         |                         |

| <b>Individual and lifestyle factors</b> |                                           |                                      |                                                                                                                           |                      |                     |
|-----------------------------------------|-------------------------------------------|--------------------------------------|---------------------------------------------------------------------------------------------------------------------------|----------------------|---------------------|
| Stress management                       |                                           | 63/130 (48) <sup>(79)</sup>          | 30/78<br>(39) <sup>(104)</sup>                                                                                            | 82/186 (44)<br>(107) |                     |
| Relaxation                              | 261/500 (52)<br>(60)                      | 22/130 (17) <sup>(79)</sup>          | 13/30 (42)<br>(100)<br>7/72 (10) <sup>(88)</sup>                                                                          |                      |                     |
| Enjoyment                               |                                           | 33/130 (25) <sup>(79)</sup>          | 34/72 (47)<br>(88)<br>21/105 (20)<br>(90)<br>30/78<br>(39) <sup>(104)</sup>                                               |                      |                     |
| Addiction                               | 431/500 (86)<br>(60)                      | 51/130 (39) <sup>(79)</sup>          | 56 (53) <sup>(90)</sup><br>10/30 (33)<br>(100)                                                                            | 93/186 (50)<br>(107) |                     |
| Cravings                                |                                           |                                      | 53/78<br>(68) <sup>(104)</sup><br>47/96<br>(48) <sup>(101)</sup>                                                          |                      |                     |
| Withdrawal symptoms                     |                                           |                                      | 85/96<br>(87) <sup>(101)</sup>                                                                                            |                      |                     |
| Habit                                   | 411/500 (82)<br>(60)                      | 95/130 (73) <sup>(79)</sup>          | 26/72 (36)<br>(88)<br>20/105 (19)<br>(90)<br>17/30 (58)<br>(100)                                                          |                      |                     |
| Perceived Mental Health Benefits        |                                           | 6 – 30/130<br>(5-23) <sup>(79)</sup> | 21/105 (20)<br>(90)<br>7 – 8/72 (10-11)<br>(88)<br>41/78<br>(53) <sup>(104)</sup><br>41-76/96<br>(42-78) <sup>(101)</sup> |                      |                     |
| Concentration                           |                                           |                                      | 27-56/96<br>(28-55) <sup>(101)</sup>                                                                                      |                      |                     |
| Low levels of motivation                | 131/350 (38)<br>(70)                      |                                      | 46/96<br>(47) <sup>(101)</sup>                                                                                            |                      |                     |
| Weight gain                             | 69/350 (20)<br>(70)                       | 6/130 (5) <sup>(79)</sup>            | 3/72 (4) <sup>(88)</sup><br>39/96<br>(40) <sup>(101)</sup>                                                                | 38/186 (20)<br>(107) |                     |
| Other substance use                     |                                           |                                      | 3/72 (4) <sup>(88)</sup><br>2-8/78<br>(3-10) <sup>(104)</sup><br>13-40/96<br>(13-41) <sup>(101)</sup>                     |                      |                     |
| Problems getting to sleep               |                                           |                                      | 23/96 (23)<br>(101)                                                                                                       |                      |                     |
| Low confidence and perceived difficulty | 87 - 202/350<br>(25 - 58) <sup>(70)</sup> |                                      | 22/78<br>(24) <sup>(104)</sup>                                                                                            |                      | 25/34 (74)<br>(109) |
| <b>Social and community networks</b>    |                                           |                                      |                                                                                                                           |                      |                     |



|                                                    |                                              |                             |                                                                                   |                                                              |                            |
|----------------------------------------------------|----------------------------------------------|-----------------------------|-----------------------------------------------------------------------------------|--------------------------------------------------------------|----------------------------|
| High prevalence and acceptability in the community | 332/500 (66)<br>(60)<br>116/350 (33)<br>(70) | 5/130 (12) <sup>(79)</sup>  | 13/105 (13)<br>(90)<br>5/72 (7) <sup>(88)</sup><br>34/78<br>(43) <sup>(104)</sup> | 78/186 (42)<br>(107)                                         | 27/34 (79)<br>(109)        |
| Lack of social support                             | 90/350 (26)<br>(70)                          |                             |                                                                                   | 48/186 (26)<br>(107)<br>70-79/98<br>(71-79) <sup>(106)</sup> | 10/34 (29)<br>(109)        |
| Lack of health and other professional support      |                                              |                             | 3/72 (4) <sup>(88)</sup>                                                          |                                                              | 19/34 (56)<br>(109)        |
| Social activity                                    |                                              | 44/130 (34) <sup>(79)</sup> | 17/30 (58)<br>(100)<br>2/72 (3) <sup>(88)</sup>                                   |                                                              |                            |
| Availability of cigarettes                         |                                              | 5/130 (4) <sup>(79)</sup>   | 8/105 (8) <sup>(90)</sup><br>5/72 (7) <sup>(88)</sup>                             |                                                              |                            |
| <b>Living and working conditions</b>               |                                              |                             |                                                                                   |                                                              |                            |
| Access to quit resources                           | 108/350<br>(31) <sup>(70)</sup>              |                             |                                                                                   |                                                              | 9/34 (27) <sup>(109)</sup> |
| Boredom                                            | 242/500 (48)<br>(60)                         | 38/130 (29) <sup>(79)</sup> | 9/72 (13) <sup>(88)</sup><br>13/105 (13)<br>(90)                                  |                                                              |                            |
| Stressful factors                                  |                                              |                             | 4/72 (6) <sup>(88)</sup>                                                          |                                                              |                            |
| Living environments                                |                                              |                             |                                                                                   |                                                              | 20 (59) <sup>(109)</sup>   |

<sup>a</sup> Decimals rounded to nearest whole number where appropriate.

<sup>b</sup> Numerators/denominators are presented first, followed by proportion (in parentheses), followed by reference.

## DISCUSSION

This is the first systematic review reporting perceived barriers to smoking cessation across a range of vulnerable groups. The findings from 54 qualitative, eight quantitative and three mixed methods studies demonstrate that barriers to quitting smoking operate at multiple levels including individual and lifestyle factors; social and community networks; living conditions; and cultural and socioeconomic factors. These include: smoking for stress management; enjoyment of smoking; addiction to nicotine; habit; social acceptability of smoking; lack of support to quit and access to quit resources; boredom; stressful life factors; pro-smoking living environments; cultural norms and socioeconomic disadvantage. Stress management, lack of support from health professionals and other service providers and the high prevalence and acceptability of smoking in communities were the three barriers common across all six vulnerable groups included in this review. The identification of perceived barriers common across vulnerable groups is an extension of the previous literature.

The identified barriers broadly reflect those reported in two systematic reviews limited to pregnant smokers (47) and Indigenous Australian pregnant smokers (32) and two critical reviews providing summaries of the challenges to cessation amongst low income smokers (33) and low income; rural; homeless; hard core; immigrant and HIV positive smokers (48). Addiction to nicotine, habit, stress management, enjoyment and weight gain are typically reported barriers to smoking cessation within the general population (26-28, 114). No studies were found that directly compared barriers experienced by vulnerable groups and smokers in the general population. To the authors knowledge, only one study has assessed the effect of socioeconomic position on barriers to quitting smoking and identified that decreasing SEP was associated with higher likelihood of reporting stress management and boredom as barriers (28). This review did not aim to provide direct comparisons between vulnerable groups and the general population due to the heterogeneity of studies.

1  
2  
3 Additionally, comparisons by gender were beyond the scope of this review, but should be  
4 considered for further research, as socioeconomic disadvantage has differential effects on  
5 males and females (20) and preliminary evidence suggests barriers to cessation may differ by  
6 gender (28, 70).  
7  
8  
9  
10

11  
12 Nevertheless, the novel results of this review indicate that vulnerable smokers report a  
13 number of additional barriers to cessation that operate within their social and community  
14 networks; living conditions; and wider cultural and socioeconomic contexts. Social and  
15 community barriers include: lack of support to quit from both peers and health and other  
16 professionals; high prevalence and acceptability of smoking within vulnerable communities  
17 and smoking as a social activity. Living conditions include: stressful factors; pro-smoking  
18 living and working circumstances; lack of access to quit resources; social and geographical  
19 isolation and boredom. Cultural norms and socioeconomic disadvantage also presented  
20 barriers to quitting.  
21  
22  
23  
24  
25  
26  
27  
28  
29  
30  
31  
32  
33

#### 34 **Main barriers identified across all vulnerable groups**

##### 35 *Stress management*

36  
37 Stress management was a frequently reported individual level barrier. Smokers  
38 typically demonstrate higher levels of stress and low mood than non-smokers and ex-smokers  
39 (115-117). Smoking may provide a coping mechanism for individuals who are prone to  
40 higher levels of stress (118-120) or smoking may act as a stressor due to neurobiological  
41 processes or through the experience of withdrawal symptoms (120). Stressors associated with  
42 vulnerable groups (for example unemployment, financial stress, and poverty) may compound  
43 stress levels within vulnerable groups. Given that vulnerable smokers may be more likely to  
44 report smoking in order to relieve stress (28) incorporating stress management techniques  
45 into interventions targeted at vulnerable groups may help to increase cessation.  
46  
47  
48  
49  
50  
51  
52  
53  
54  
55  
56  
57  
58  
59  
60

1  
2  
3 *Lack of support to quit from health professionals and other service providers*  
4

5 At the social and community level, a lack of support to quit from health professionals  
6 and other service providers was identified. This reflects research that suggests smokers from  
7 low SEP are less likely to receive advice to quit from a healthcare provider than their more  
8 higher SEP counterparts (121), despite evidence demonstrating brief advice can increase the  
9 likelihood of successful quitting (122, 123). Both organisational and individual factors affect  
10 the provision of quit advice by health and other service providers. These include lack of time,  
11 confidence, knowledge and counselling skills (124). Efforts should be focussed on improving  
12 health professionals' ability to offer quit advice and may benefit from examining how best to  
13 ensure compliance to existing guidelines that provide clear recommendations on identifying  
14 individuals who are at higher risk of smoking and addressing the unique issues that these  
15 individuals face.  
16  
17  
18  
19  
20  
21  
22  
23  
24  
25  
26  
27  
28

29 Tailoring interventions to the specific needs of vulnerable groups may be effective.  
30 Tailored interventions for behaviour change have been found to be effective compared to no  
31 intervention or dissemination of guidelines or educational materials alone [92]. Given that  
32 this review identified three common barriers across the six vulnerable groups include in this  
33 review, we argue that subsequent smoking cessation interventions in vulnerable groups  
34 should seek to address these factors. Programs should include specific modules on stress  
35 management techniques and how best to combat stress in vulnerable groups as well as  
36 educating smokers about how stress relief and relief from nicotine withdrawal symptoms can  
37 be confounded.  
38  
39  
40  
41  
42  
43  
44  
45  
46  
47  
48

49 Smoking cessation interventions should be designed to maximise participation by  
50 vulnerable groups, addressing the key barriers around acceptability and access to  
51 interventions. Utilising existing services and organisations that are highly accessed by  
52 vulnerable groups and are a trusted source of help for vulnerable groups is also necessary.  
53  
54  
55  
56  
57  
58  
59  
60

1  
2  
3 There is accumulating evidence that social and community service organisations (SCSOs) are  
4 well placed to provide brief smoking cessation advice to highly vulnerable clients (125, 126).  
5  
6

### 7 *High prevalence and acceptability of smoking*

8  
9  
10 The high prevalence and social acceptability of smoking within vulnerable  
11 communities was frequently reported. Considerable measures have been taken to address the  
12 denormalisation of smoking in the general population through regulation and legislative  
13 changes such as restrictions in advertising, smoke-free environment policies and point of sale  
14 restriction (1, 127, 128). Participants who were homeless, experiencing mental illness and  
15 prisoners cited a lack of restrictions on smoking within their living environments (or lack of  
16 enforcement of existing policies) as a factor that reinforced their smoking. While there are  
17 challenges associated with their implementation, smoke free areas can be successfully  
18 implemented within mental health treatment centres and prisons (129-131) and there is  
19 potential to extend these restrictions to homeless shelters and public housing developments.  
20  
21  
22  
23  
24  
25  
26  
27  
28  
29  
30

31  
32 Efforts to encourage the denormalisation of smoking in the environments of  
33 vulnerable communities require further exploration. Providing access to acceptable and  
34 effective behavioural and pharmacological supports should ensure that denormalisation does  
35 not result in compounding stigma and further isolating vulnerable groups (127, 132).  
36  
37  
38  
39

### 40 **Barriers specific to certain groups**

#### 41 *Indigenous groups*

42  
43  
44  
45 Indigenous groups identified unique stressors linked to smoking including racism and  
46 historical factors; cultural practices including ceremonial use of tobacco and cultural values  
47 that promote sharing, kinship and reciprocity and the importance of smoking as a way to  
48 maintain cultural identity. Cultural values also had effects on the willingness of Indigenous  
49 participants to access smoking support services. Certain Indigenous groups may be less likely  
50 to receive advice to quit or engage with services designed to aid in cessation (133). However,  
51  
52  
53  
54  
55  
56  
57  
58  
59  
60

1  
2  
3 it is important to note that smoking cessation programs have been shown to be effective  
4 within Indigenous groups (113, 134). Culturally appropriate interventions tailored to the  
5 needs of Indigenous smokers should continue to be developed, implemented and evaluated.  
6  
7 These programs should acknowledge the cultural significance of tobacco use and the  
8 important historical and social factors associated with Indigenous groups and smoking (135).

#### 14 *Prisoners*

16 Prisoners identified unique stressors within their living conditions that contributed to  
17 their smoking including social isolation, anxiety regarding legal matters and transfers to other  
18 prisons. A recent multicomponent randomised controlled trial that included improving stress  
19 management skills in prisoners found similar point prevalence abstinence rates as another  
20 trial conducted with prisoners (9) and other community based studies (136, 137). Thus,  
21 smoking cessation programs can be effective even in prison environments that are highly  
22 conducive to smoking and should form a part of routine care within prison systems.

#### 31 *People with a mental illness*

34 Low motivation to quit smoking was only reported in studies involving smokers with  
35 a mental illness. This contradicts research showing no difference in motivation to quit  
36 between those with severe mental illness and the general population (138). A recent review  
37 concluded there is some evidence to suggest that individuals diagnosed with a psychotic  
38 disorder are slightly less motivated to quit than those diagnosed with depression (138).  
39 Possible reasons for this include the symptoms associated with schizophrenia (including  
40 amotivation), management of side effects of medications (including Parkinsonism), limited  
41 support systems, low perceived vulnerability to smoking related disease, lack of alternate  
42 coping mechanisms and poverty (138, 139). Information on the diagnoses of participants was  
43 only reported in one of the studies reporting motivation as a barrier in this review (92) where  
44 the majority of participants were diagnosed with a psychotic disorder. However, other studies  
45  
46  
47  
48  
49  
50  
51  
52  
53  
54  
55  
56  
57  
58  
59  
60

1  
2  
3 did not provide information on participants' diagnoses and further exploration is beyond the  
4  
5 scope of this review.  
6

7  
8 Symptom management also presented a significant barrier within studies concerning  
9  
10 people with a mental illness. There is evidence to suggest that biochemical processes between  
11  
12 nicotine and other substances in tobacco improve some symptoms of mental illness (139).  
13  
14 Additionally, smokers with a mental illness may be more likely to misattribute their  
15  
16 withdrawal symptoms as recurring mental illness symptoms. Further investigation and  
17  
18 education regarding cessation and symptom management with people with a mental illness is  
19  
20 warranted. Integrating smoking cessation care with mental health and addiction treatments  
21  
22 can be effective at promoting cessation rates in groups with mental illness (21, 31). However,  
23  
24 future studies need to investigate ways to maintain long term smoking cessation as well as  
25  
26 systems-level changes that may support smoking cessation in people with mental illness (131,  
27  
28 140).  
29  
30

### 31 32 **Barriers to smoking cessation in vulnerable groups: a model**

33  
34 Figure 2 visually demonstrates the broad range of barriers to cessation reported by vulnerable  
35  
36 groups, many of which exist outside of the realm of the individual. This model demonstrates  
37  
38 the interconnectedness of individual and lifestyle factors with the wider social and  
39  
40 community factors, living conditions and cultural, socioeconomic and environmental factors.  
41  
42 The two darker spheres holding social and community networks and individual and lifestyle  
43  
44 factors identify those factors that are potentially modifiable through short term health  
45  
46 behaviour change interventions. This model does not provide an exhaustive list of all of the  
47  
48 factors that prevent vulnerable individuals from smoking cessation. It does provide a  
49  
50 framework for understanding the perceived self-reported barriers to quitting smoking  
51  
52 identified in this review.  
53  
54  
55  
56  
57  
58  
59  
60

### Strengths and limitations

This synthesis of the literature provides evidence of the perceived barriers to smoking cessation by examining the methodological quality of studies and comparing between and within selected vulnerable groups. However, this review has some limitations. While the overall quality of the studies included in this review was acceptable, most qualitative studies failed to provide information regarding the trustworthiness of the research and most quantitative studies failed to provide information on the validity and reliability of the survey measures used to assess barriers. Strategies for enhancing the trustworthiness of qualitative research have been concisely summarised (141) and future qualitative studies should seek to employ these strategies where possible. Future quantitative studies should seek to report at least brief psychometric properties of survey measures used to assess barrier to smoking cessation, including reliability and validity.

Of quantitative studies included, the majority used convenience samples. It is not generally feasible to target vulnerable and hard to reach populations using random population sampling procedures. This limits the generalizability and transferability of the included studies to wider vulnerable populations. Nevertheless, the agreement in findings between qualitative studies does suggest that these results are robust.

The nature of the studies included in this review means that no weight is given to the different barriers and the authors cannot provide comment on which, if any, barriers should be made a priority to target in smoking cessation interventions with vulnerable groups. Given limited resources and funds, addressing all barriers is rarely possible. Future research is needed to identify those barriers which are most important to address first and to prioritise resourcing and intervention development.

The results of this review were broadly categorised according to the SDHF, however these categories are not mutually exclusive and certain barriers were able to be included in



1  
2  
3 multiple categories (for example stress and stressful factors could be categorised as either  
4 individual level barriers or barriers within the living conditions level). The reviewed studies  
5 do not directly clarify whether the nature of stress experienced in vulnerable groups is  
6 personal or contextual. Constructs such as coping and resilience (140, 142) have been  
7 hypothesised as mediators between stress and smoking in low socioeconomic groups (143).  
8  
9

10  
11 Similarly, as this review sought to provide a summary of vulnerable smokers'  
12 perceived self-reported barriers to cessation, other barriers which may be important  
13 determinants of quit attempts and success were not considered. Barriers such as the  
14 knowledge and attitudes of staff and health professionals and the capacity of services to offer  
15 smoking cessation programs, which have been identified within the literature (124), should  
16 also be considered when examining the challenges facing vulnerable groups.  
17  
18  
19  
20  
21  
22  
23  
24  
25  
26

27  
28 This review was only able to identify four studies that examined the barriers to  
29 quitting smoking within prisoner (n=2 studies) and homeless (n=2) groups and one study  
30 focussing on at-risk youth. These results indicate more research is required with these groups  
31 to examine the barriers to smoking cessation. More studies investigating the barriers to  
32 cessation within these groups may lead to identification of additional common and unique  
33 barriers across vulnerable groups. Additionally, this review was limited to studies conducted  
34 within one of six vulnerable groups. Other groups that show high rates of smoking include  
35 lesbian, gay, bisexual and transgender groups (144); culturally and linguistically diverse  
36 groups (145); and rural and remote communities (146). The authors acknowledge the  
37 disparity in smoking prevalence in these groups, however their inclusion would have  
38 increased the breadth of the review to a level that would be too broad and complex to be  
39 useful. These groups may experience barriers to cessation different to those experienced by  
40 the groups included in this review. It should also be noted that individuals within the included  
41 groups often experience multiple forms of disadvantage for example people who are  
42  
43  
44  
45  
46  
47  
48  
49  
50  
51  
52  
53  
54  
55  
56  
57  
58  
59  
60

1  
2  
3 homeless are more likely to experience a mental illness (147) and Indigenous communities  
4  
5 are more likely to be overrepresented in lower socioeconomic positions (3).  
6

## 7 8 **Conclusions**

9  
10 These results support findings that vulnerable groups experience common barriers to  
11 smoking cessation, and also barriers which are unique to specific vulnerable groups. Stress  
12 management, high prevalence and acceptability of smoking and lack of support to quit were  
13 identified as priority areas for cessation research, program implementation and policy change.  
14 Many of the barriers identified within this review are modifiable through short term health  
15 behaviour change strategies. For heterogeneous groups of vulnerable individuals, intervention  
16 development should seek to address those barriers common to all vulnerable groups identified  
17 in this review. For relatively homogenous groups of vulnerable individuals, interventions  
18 should seek to address the unique barriers faced by those groups in addition to those barriers  
19 identified as common to all vulnerable groups.  
20  
21  
22  
23  
24  
25  
26  
27  
28  
29  
30  
31

32 These findings, coupled with lower success rates in quitting within vulnerable groups  
33 relative to the success rates in more advantaged groups (14, 148), suggest that interventions  
34 with vulnerable groups need to address wider social, community and cultural factors as well  
35 as individualised cessation support. Addressing the predictors of cessation found within the  
36 general population such as nicotine dependence and enjoyment remain important for  
37 vulnerable groups.  
38  
39  
40  
41  
42  
43  
44  
45  
46  
47  
48  
49  
50  
51  
52  
53  
54  
55  
56  
57  
58  
59  
60

## Figure legends

Figure 1 – Database search results

Figure 2 - Model of the barriers to smoking cessation

## Acknowledgements:

We are grateful to Research Assistant (RA) Ms Madeleine Randell and to Dr Michelle Anderson for providing valuable comment on draft manuscripts.

**Contributorship statement:** All authors conceived the initial scope and subject of the review. LT carried out all searches, wrote up drafts and performed quality assessment. BB, CP and JB provided extensive feedback and contributions to drafts of the paper. All authors completed quality assessment of the included papers. BB and LT completed narrative synthesis. All authors have read and met the ICMJE criteria for authorship.

**Competing interests:** All authors have completed the Unified Competing Interest Form at [www.icmje.org/coi\\_disclosure.pdf](http://www.icmje.org/coi_disclosure.pdf) (available on request from the corresponding author) and declare that: no support from any organisation for the submitted work; no financial relationships with any organisations that might have an interest in the submitted work in the previous three years; no other relationships or activities that could appear to have influenced the submitted work.

**Funding:** BB is supported by a Cancer Institute NSW Career Development Fellowship and a University of Newcastle Faculty of Health and Medicine Gladys M Brawn Career Development Fellowship. JB is supported by an Australian Research Council Post-Doctoral Industry Fellowship. CP is supported by Newcastle Cancer Control Collaborative funding. LT is supported by a 50:50 scholarship from the University of Newcastle Faculty of Health and Medicine and the Cancer Institute NSW.

**Data sharing:** There are no additional data available.

## REFERENCES

1. World Health Organization (WHO). WHO report on the Global Tobacco Epidemic. Geneva: 2008.
2. Australian Institute of Health and Welfare (AIHW). 2010 National Drug Strategy Household Survey: Detailed findings. Canberra: 2010 Contract No.: Cat. no. PHE145.
3. Australian Institute of Health and Welfare. The health and welfare of Australia's Aboriginal and Torres Strait Islander people, an overview 2011. Canberra: 2011 Contract No.: Cat. no. IHW 42.
4. Centers for Disease Control Prevention (CDCP). Current cigarette smoking among adults - United States, 2011. *MMWR Morb Mortal Wkly Rep.* 2012;61(44):889-94. Epub 2012/11/09.
5. Statistics Canada. Canadian Community Health Survey 2000/01 Ottawa: Statistics Canada, 2001.
6. Lawrence D, Mitrou F, Zubrick SR. Smoking and mental illness: results from population surveys in Australia and the United States. *BMC Public Health.* 2009;9:285. Epub 2009/08/12.
7. Kelly P, Baker, AL., Deane, FP., Kay-Lambkin, FJ., Bonevski, B., Tregarthen, J. . Prevalence of smoking and other health risk factors in people attending residential substance abuse treatment. *Drug Alcohol Rev.* 2012;31(5):638-44. doi: 10.1111/j.465-3362.2012.00465.x. Epub 2012 May 30.
8. Baggett TP, Rigotti NA. Cigarette smoking and advice to quit in a national sample of homeless adults. *Am J Prev Med.* 2010;39(2):164-72. Epub 2010/07/14.
9. Cropsey K, Eldridge G, Weaver M, Villalobos G, Stitzer M, Best A. Smoking cessation intervention for female prisoners: addressing an urgent public health need. *Am J Public Health.* 2008;98(10):1894-901. Epub 2008/08/16.
10. Indig D, Topp L, Ross B, Mamoon H, Border B, Kumar S, et al. 2009 NSW Inmate Health Survey: Key Findings Report Sydney: Justice Health, 2010.
11. Wiebel WW. Identifying and gaining access to hidden populations. *NIDA Res Monogr.* 1990;98:4-11. Epub 1990/01/01.
12. McLachlan R, Gilfillan G, Gordon J. Deep and Persistent Disadvantage in Australia. Canberra: 2013.
13. Hyland A, Borland R, Li Q, Yong HH, McNeill A, Fong GT, et al. Individual-level predictors of cessation behaviours among participants in the International Tobacco Control (ITC) Four Country Survey. *Tob Control.* 2006;15 Suppl 3:iii83-94. Epub 2006/06/07.
14. Kotz D, West R. Explaining the social gradient in smoking cessation: it's not in the trying, but in the succeeding. *Tob Control.* 2009;18(1):43-6.
15. Gilman SE, Martin LT, Abrams DB, Kawachi I, Kubzansky L, Loucks EB, et al. Educational attainment and cigarette smoking: a causal association? *Int J Epidemiol.* 2008;37(3):615-24. Epub 2008/01/09.
16. Hatzianandreu EJ, Pierce JP, Lefkopoulou M, Fiore MC, Mills SL, Novotny TE, et al. Quitting smoking in the United States in 1986. *J Natl Cancer Inst.* 1990;82(17):1402-6. Epub 1990/09/05.
17. Levy DT, Romano E, Mumford E. The relationship of smoking cessation to sociodemographic characteristics, smoking intensity, and tobacco control policies. *Nicotine Tob Res.* 2005;7(3):387-96. Epub 2005/08/09.
18. Reid JL, Hammond D, Boudreau C, Fong GT, Siahpush M, Collaboration ITC. Socioeconomic disparities in quit intentions, quit attempts, and smoking abstinence among smokers in four western countries: findings from the International Tobacco Control Four Country Survey. *Nicotine Tob Res.* 2010;12 Suppl:S20-33. Epub 2010/10/15.
19. Giskes K, van Lenthe FJ, Turrell G, Brug J, Mackenbach JP. Smokers living in deprived areas are less likely to quit: a longitudinal follow-up. *Tob Control.* 2006;15(6):485-8. Epub 2006/11/30.
20. Graham H, Inskip HM, Francis B, Harman J. Pathways of disadvantage and smoking careers: evidence and policy implications. *J Epidemiol Community Health.* 2006;60 Suppl 2:7-12. Epub 2007/08/22.
21. Hiscock R, Bauld L, Amos A, Fidler JA, Munafo M. Socioeconomic status and smoking: a review. *Ann N Y Acad Sci.* 2012;1248:107-23. Epub 2011/11/19.

- 1
- 2
- 3 22. Melnyk KA. Barriers: a critical review of recent literature. *Nurs Res.* 1988;37(4):196-201.
- 4 Epub 1988/07/01.
- 5 23. Dahlgren G, & Whitehead, M. . Policies and strategies to promote equity in health.
- 6 Copenhagen: 1992.
- 7 24. Marmot M. Social determinants of health inequalities. *Lancet.* 2005;365(9464):1099-104.
- 8 Epub 2005/03/23.
- 9 25. Theobald W, Smith, SS., Fiore, M. . Insights: Smoking in Wisconsin. University of Wisconsin
- 10 Medical School: UW Center for Tobacco Research and Intervention, 2002.
- 11 26. Guirguis AB, Ray SM, Zingone MM, Airee A, Franks AS, Keenum AJ. Smoking cessation:
- 12 barriers to success and readiness to change. *Tenn Med.* 2010;103(9):45-9. Epub 2010/12/09.
- 13 27. Orleans CT, Jepson C, Resch N, Rimer BK. Quitting motives and barriers among older
- 14 smokers. The 1986 Adult Use of Tobacco Survey revisited. *Cancer.* 1994;74(7 Suppl):2055-61. Epub
- 15 1994/10/01.
- 16 28. Fidler JA, West R. Self-perceived smoking motives and their correlates in a general
- 17 population sample. *Nicotine Tob Res.* 2009;11(10):1182-8. Epub 2009/07/31.
- 18 29. Poland B, Frohlich K, Haines RJ, Mykhalovskiy E, Rock M, Sparks R. The social context of
- 19 smoking: the next frontier in tobacco control? *Tob Control.* 2006;15(1):59-63. Epub 2006/01/27.
- 20 30. Paul CL, Ross S, Bryant J, Hill W, Bonevski B, Keevy N. The social context of smoking: A
- 21 qualitative study comparing smokers of high versus low socioeconomic position. *BMC Public Health.*
- 22 2010;10:211. Epub 2010/04/28.
- 23 31. Rodriguez D, Carlos HA, Adachi-Mejia AM, Berke EM, Sargent JD. Predictors of tobacco
- 24 outlet density nationwide: a geographic analysis. *Tob Control.* 2013;22(5):349-55. Epub 2012/04/12.
- 25 32. Gould GS, Munn J, Watters T, McEwen A, Clough AR. Knowledge and views about maternal
- 26 tobacco smoking and barriers for cessation in Aboriginal and Torres Strait Islanders: A systematic
- 27 review and meta-ethnography. *Nicotine Tob Res.* 2013;15(5):863-74. Epub 2012/10/09.
- 28 33. Gollust SE, Schroeder SA, Warner KE. Helping smokers quit: understanding the barriers to
- 29 utilization of smoking cessation services. *Milbank Q.* 2008;86(4):601-27. Epub 2009/01/06.
- 30 34. Australian National Preventive Health Agency. A priority-driven research agenda for tobacco
- 31 control in Australia. 2013.
- 32 35. World Health Organisation. Report on the global tobacco epidemic, 2013. 2013.
- 33 36. U.S. Department of Health and Human Services. Ending the tobacco Epidemic: A tobacco
- 34 control strategic action plan for the U.S. Department of Health and Human Services. In: Office of the
- 35 Assistant Secretary for Health, editor. Washington, DC. November, 2010. .
- 36 37. Moher D, Liberati A, Tetzlaff J, Altman DG, Group P. Preferred reporting items for systematic
- 37 reviews and meta-analyses: the PRISMA statement. *PLoS Med.* 2009;6(7):e1000097. Epub
- 38 2009/07/22.
- 39 38. Tong A, Flemming K, McInnes E, Oliver S, Craig J. Enhancing transparency in reporting the
- 40 synthesis of qualitative research: ENTREQ. *BMC Med Res Methodol.* 2012;12:181. Epub 2012/11/29.
- 41 39. Carson KV, Brinn MP, Peters M, Veale A, Esterman AJ, Smith BJ. Interventions for smoking
- 42 cessation in Indigenous populations. *Cochrane Database Syst Rev.* 2012;1:CD009046. Epub
- 43 2012/01/20.
- 44 40. Cunningham C, Stanley F. Indigenous by definition, experience, or world view. *BMJ.*
- 45 2003;327(7412):403-4. Epub 2003/08/23.
- 46 41. Letts L, Wilkins S, Stewart D, Bosch J, Westmorland M. Critical Review Form - Qualitative
- 47 Studies (Version 2.0). McMaster University; 2007; Available from:
- 48 <http://www.fhs.mcmaster.ca/rehab/ebp/>.
- 49 42. Barley EA, Murray J, Walters P, Tylee A. Managing depression in primary care: A meta-
- 50 synthesis of qualitative and quantitative research from the UK to identify barriers and facilitators.
- 51 *BMC Fam Pract.* 2011;12:47. Epub 2011/06/11.
- 52 43. O'Cathain A, Murphy E, Nicholl J. The quality of mixed methods studies in health services
- 53 research. *J Health Serv Res Policy.* 2008;13(2):92-8. Epub 2008/04/18.
- 54
- 55
- 56
- 57
- 58
- 59
- 60

- 1
- 2
- 3 44. Popay J, Roberts H, Sowden A, Petticrew M, Arai L, Rodgers M, et al. Guidance on the
- 4 Conduct of Narrative Synthesis in Systematic Reviews. 2006.
- 5 45. Rumrill Jr PD, Fitzgerald SM. Using narrative literature reviews to build a scientific knowledge
- 6 base. *Work*. 2001;16(2):165-70. Epub 2002/11/21.
- 7 46. Denyer D, & Tranfield, D. Using qualitative research synthesis to build an actionable
- 8 knowledge base. *Manage Decis*. 2006;44(2):213-27.
- 9 47. Ingall G, Cropley M. Exploring the barriers of quitting smoking during pregnancy: a
- 10 systematic review of qualitative studies. *Women Birth*. 2010;23(2):45-52. Epub 2009/11/03.
- 11 48. Browning K, Baker, CJ., McNally, GA., Wewers, ME. . Nursing research in tobacco use and
- 12 special populations. *Annu Rev Nurs Res*. 2009;27:319-42.
- 13 49. Ahijevych K, Kuun P, Christman S, Wood T, Browning K, Wewers ME. Beliefs about tobacco
- 14 among Appalachian current and former users. *Appl Nurs Res*. 2003;16(2):93-102. Epub 2003/05/24.
- 15 50. Bancroft A, Wiltshire S, Parry O, Amos A. "It's like an addiction first thing...afterwards it's like
- 16 a habit": daily smoking behaviour among people living in areas of deprivation. *Soc Sci Med*.
- 17 2003;56(6):1261-7. Epub 2003/02/26.
- 18 51. Beech BM, Scarinci IC. Smoking attitudes and practices among low-income African-
- 19 Americans: qualitative assessment of contributing factors. *Am J Health Promot*. 2003;17(4):240-8.
- 20 Epub 2003/03/19.
- 21 52. Bryant J, Bonevski B, Paul C, O'Brien J, Oakes W. Developing cessation interventions for the
- 22 social and community service setting: a qualitative study of barriers to quitting among
- 23 disadvantaged Australian smokers. *BMC Public Health*. 2011;11:493. Epub 2011/06/28.
- 24 53. Copeland L. An exploration of the problems faced by young women living in disadvantaged
- 25 circumstances if they want to give up smoking: can more be done at general practice level? *Fam*
- 26 *Pract*. 2003;20(4):393-400. Epub 2003/07/24.
- 27 54. Dunn CL, Pirie PL, Lando HA. Attitudes and perceptions related to smoking among pregnant
- 28 and postpartum women in a low-income, multiethnic setting. *Am J Health Promot*. 1998;12(4):267-
- 29 74. Epub 1998/02/06.
- 30 55. Franco L, Welsby D, Eccleston P, Furber S. A qualitative study about smoking cessation with
- 31 clients of community service organisations that work with disadvantaged families. *Health Promot J*
- 32 *Austr*. 2011;22(2):153-5. Epub 2011/08/09.
- 33 56. Lacey LP, Manfredi C, Balch G, Warnecke RB, Allen K, Edwards C. Social support in smoking
- 34 cessation among black women in Chicago public housing. *Public Health Rep*. 1993;108(3):387-94.
- 35 57. Moffatt J, Whip R, Moffatt J. The Struggle to Quit: Barriers and Incentives to Smoking
- 36 Cessation. *Health Educ J*. 2004;63(2):101-12.
- 37 58. Nichter M, Nichter M, Muramoto M, Adrian S, Goldade K, Tesler L, et al. Smoking among
- 38 low-income pregnant women: an ethnographic analysis. *Health Educ Behav*. 2007;34(5):748-64.
- 39 Epub 2007/01/04.
- 40 59. Peretti-Watel P, Constance J. "It's all we got left". Why poor smokers are less sensitive to
- 41 cigarette price increases. *Int J Environ Res Public Health*. 2009;6(2):608-21. Epub 2009/05/15.
- 42 60. Price JH, Everett SA. Perceptions of lung cancer and smoking in an economically
- 43 disadvantaged population. *J Community Health*. 1994;19(5):361-75. Epub 1994/10/01.
- 44 61. Roddy E, Antoniak M, Britton J, Molyneux A, Lewis S. Barriers and motivators to gaining
- 45 access to smoking cessation services amongst deprived smokers--a qualitative study. *BMC Health*
- 46 *Serv Res*. 2006;6:147. Epub 2006/11/08.
- 47 62. Stead M, MacAskill S, MacKintosh AM, Reece J, Eadie D. "It's as if you're locked in":
- 48 qualitative explanations for area effects on smoking in disadvantaged communities. *Health Place*.
- 49 2001;7(4):333-43. Epub 2001/10/30.
- 50 63. Stewart MJ, Brosky G, Gillis A, Jackson S, Johnston G, Kirkland S, et al. Disadvantaged women
- 51 and smoking. *Can J Public Health*. 1996;87(4):257-60.
- 52 64. Stewart MJ, Gillis A, Brosky G, Johnston G, Kirkland S, Leigh G, et al. Smoking among
- 53 disadvantaged women: causes and cessation. *Can J Nurs Res*. 1996;28(1):41-60.
- 54
- 55
- 56
- 57
- 58
- 59
- 60

- 1  
2  
3 65. Stewart MJ, Greaves L, Kushner KE, Letourneau NL, Spitzer DL, Boscoe M. Where there is  
4 smoke, there is stress: low-income women identify support needs and preferences for smoking  
5 reduction. *Health Care Women Int.* 2011;32(5):359-83. Epub 2011/04/09.
- 6 66. Stillman FA, Bone L, Avila-Tang E, Smith K, Yancey N, Street C, et al. Barriers to smoking  
7 cessation in inner-city African American young adults. *Am J Public Health.* 2007;97(8):1405-8. Epub  
8 2007/06/30.
- 9 67. Tod AM. Barriers to smoking cessation in pregnancy: a qualitative study. *Br J Community  
10 Nurs.* 2003;8(2):56-64. Epub 2003/02/18.
- 11 68. Tsourtos G, Ward, PR., Muller, R. . Smoking and stress: the double edged sword of living in a  
12 disadvantaged area. *Australasian Medical Journal.* 2008;1(1).
- 13 69. Wiltshire S, Bancroft A, Parry O, Amos A. 'I came back here and started smoking again':  
14 perceptions and experiences of quitting among disadvantaged smokers. *Health Educ Res.*  
15 2003;18(3):292-303. Epub 2003/06/28.
- 16 70. Rosenthal L, Carroll-Scott A, Earnshaw VA, Sackey N, O'Malley SS, Santilli A, et al. Targeting  
17 cessation: understanding barriers and motivations to quitting among urban adult daily tobacco  
18 smokers. *Addict Behav.* 2013;38(3):1639-42. Epub 2012/12/21.
- 19 71. White S, Baird W. Disadvantaged former miners' perspectives on smoking cessation: A  
20 qualitative study. *Health Educ J.* 2013;72(6):755-60.
- 21 72. Burgess D, Fu SS, Joseph AM, Hatsukami DK, Solomon J, van Ryn M. Beliefs and experiences  
22 regarding smoking cessation among American Indians. *Nicotine Tob Res.* 2007;9 Suppl 1:S19-28.  
23 Epub 2007/03/17.
- 24 73. Choi WS, Daley CM, James A, Thomas J, Schupbach R, Segraves M, et al. Beliefs and attitudes  
25 regarding smoking cessation among American Indians: a pilot study. *Ethn Dis.* 2006;16(1):35-40.  
26 Epub 2006/04/08.
- 27 74. Dawson AP, Cargo M, Stewart H, Chong A, Daniel M. Aboriginal health workers experience  
28 multilevel barriers to quitting smoking: a qualitative study. *Int J Equity Health.* 2012;11:27. Epub  
29 2012/05/25.
- 30 75. Dawson AP, Cargo M, Stewart H, Chong A, Daniel M. "I know it's bad for me and yet I do it":  
31 exploring the factors that perpetuate smoking in Aboriginal Health Workers--a qualitative study.  
32 *BMC Health Serv Res.* 2012;12:102. Epub 2012/04/27.
- 33 76. Dennis MK, Momper SL. "It's bad around here now": tobacco, alcohol and other drug use  
34 among American Indians living on a rural reservation. *J Ethn Subst Abuse.* 2012;11(2):130-48. Epub  
35 2012/06/12.
- 36 77. Fernandez C, Wilson D. Maori women's views on smoking cessation initiatives. *Nurs Prax N Z.*  
37 2008;24(2):27-40. Epub 2008/09/25.
- 38 78. Fu SS, Burgess D, van Ryn M, Hatsukami DK, Solomon J, Joseph AM. Views on smoking  
39 cessation methods in ethnic minority communities: a qualitative investigation. *Prev Med.*  
40 2007;44(3):235-40. Epub 2006/12/19.
- 41 79. Glover M. Analysing smoking using Te Whare Tapa Wha. *NZ J Psychol.* 2005;34(1):13-9.
- 42 80. Gould GS, Munn J, Avuri S, Hoff S, Cadet-James Y, McEwen A, et al. "Nobody smokes in the  
43 house if there's a new baby in it": Aboriginal perspectives on tobacco smoking in pregnancy and in  
44 the household in regional NSW Australia. *Women Birth.* 2013;26(4):246-53.
- 45 81. Gryczynski J, Feldman R, Carter-Pokras O, Kanamori M, Chen L, Roth S. Contexts of tobacco  
46 use and perspectives on smoking cessation among a sample of urban American Indians. *J Health  
47 Care Poor Underserved.* 2010;21(2):544-58. Epub 2010/05/11.
- 48 82. Hodge FS, Struthers R. Persistent smoking among Northern Plains Indians: lenient attitudes,  
49 low harm value, and partiality toward cigarette smoking. *J Cult Divers.* 2006;13(4):181-5. Epub  
50 2007/03/07.
- 51 83. Johnston V, Thomas DP. Smoking behaviours in a remote Australian Indigenous community:  
52 the influence of family and other factors. *Soc Sci Med.* 2008;67(11):1708-16. Epub 2008/10/22.
- 53  
54  
55  
56  
57  
58  
59  
60

- 1
- 2
- 3 84. Kaholokula J, L. BK, Santos JI, Chang HK. Culturally informed smoking cessation strategies for
- 4 Native Hawaiians. *Nicotine Tob Res.* 2008;10(4):671-81. Epub 2009/03/21.
- 5 85. Passey ME, Gale JT, Sanson-Fisher RW. "It's almost expected": rural Australian Aboriginal
- 6 women's reflections on smoking initiation and maintenance: a qualitative study. *BMC Womens*
- 7 *Health.* 2011;11:55. Epub 2011/12/14.
- 8 86. Patten CA, Enoch C, Renner CC, Offord KP, Nevak C, Kelley SF, et al. Focus groups of Alaska
- 9 Native adolescent tobacco users: preferences for tobacco cessation interventions and barriers to
- 10 participation. *Health Educ Behav.* 2009;36(4):711-23. Epub 2007/12/01.
- 11 87. Wood L, France K, Hunt K, Eades S, Slack-Smith L. Indigenous women and smoking during
- 12 pregnancy: knowledge, cultural contexts and barriers to cessation. *Soc Sci Med.* 2008;66(11):2378-
- 13 89. Epub 2008/03/04.
- 14 88. Carosella AM, Ossip-Klein DJ, Owens CA. Smoking attitudes, beliefs, and readiness to change
- 15 among acute and long term care inpatients with psychiatric diagnoses. *Addict Behav.*
- 16 1999;24(3):331-44. Epub 1999/07/10.
- 17 89. Davis K, Brunette M, Vorhies V, Ferron J, Whitley R. A qualitative study of how individuals
- 18 with severe mental illness assess smoking risks. *Mental Health and Substance Use.* 2010;3(2):110-23.
- 19 90. Goldberg JO, Moll S, Washington A. Exploring the Challenge of Tobacco Use and
- 20 Schizophrenia. *Psychiatric Rehabilitation Skills.* 1996;1(2):55-67.
- 21 91. Howard LM, Bekele D, Rowe M, Demilew J, Bewley S, Marteau TM. Smoking cessation in
- 22 pregnant women with mental disorders: a cohort and nested qualitative study. *BJOG.*
- 23 2013;120(3):362-70. Epub 2012/11/22.
- 24 92. Kerr S, Woods C, Knussen C, Watson H, Hunter R. Breaking the habit: a qualitative
- 25 exploration of barriers and facilitators to smoking cessation in people with enduring mental health
- 26 problems. *BMC Public Health.* 2013;13:221. Epub 2013/03/19.
- 27 93. Lawn SJ, Pols RG, Barber JG. Smoking and quitting: a qualitative study with community-living
- 28 psychiatric clients. *Soc Sci Med.* 2002;54(1):93-104. Epub 2002/02/01.
- 29 94. Lucksted A, Dixon LB, Sembly JB. A focus group pilot study of tobacco smoking among
- 30 psychosocial rehabilitation clients. *Psychiatr Serv.* 2000;51(12):1544-8. Epub 2000/11/30.
- 31 95. Morris CD, Waxmonsky JA, May MG, Giese AA. What do persons with mental illnesses need
- 32 to quit smoking? Mental health consumer and provider perspectives. *Psychiatr Rehabil J.*
- 33 2009;32(4):276-84. Epub 2009/04/07.
- 34 96. Nawaz S, Frounfelker R, Ferron JC, Carpenter-Song EA, Davis K, Brunette MF. Smoking and
- 35 Quitting Beliefs, Attitudes, and Behaviors Among Smokers With Severe Mental Illness From Three
- 36 Race/Ethnicity Groups. *Journal of Dual Diagnosis.* 2012;8(3):180-7.
- 37 97. Snyder M, McDevitt J, Painter S. Smoking cessation and serious mental illness. *Arch Psychiatr*
- 38 *Nurs.* 2008;22(5):297-304. Epub 2008/09/24.
- 39 98. Solway ES. The lived experiences of tobacco use, dependence, and cessation: insights and
- 40 perspectives of people with mental illness. *Health Soc Work.* 2011;36(1):19-32. Epub 2011/03/31.
- 41 99. Tsourtos G, Ward PR, Muller R, Lawn S, Winefield AH, Hersh D, et al. The importance of
- 42 resilience and stress to maintaining smoking abstinence and cessation: a qualitative study in
- 43 Australia with people diagnosed with depression. *Health Soc Care Community.* 2011;19(3):299-306.
- 44 Epub 2010/12/09.
- 45 100. Van Dongen CJ. Smoking and persistent mental illness: an exploratory study. *J Psychosoc*
- 46 *Nurs Ment Health Serv.* 1999;37(11):26-34. Epub 1999/11/26.
- 47 101. Asher MK, Martin RA, Rohsenow DJ, MacKinnon SV, Traficante R, Monti PM. Perceived
- 48 barriers to quitting smoking among alcohol dependent patients in treatment. *J Subst Abuse Treat.*
- 49 2003;24(2):169-74. Epub 2003/05/15.
- 50 102. Clancy N, Zwar N, Richmond R. Depression, smoking and smoking cessation: A qualitative
- 51 study. *Fam Pract.* 2013;30(5):587-92.
- 52
- 53
- 54
- 55
- 56
- 57
- 58
- 59
- 60



- 1  
2  
3 103. Prochaska JJ, Fromont SC, Wa C, Matlow R, Ramo DE, Hall SM. Tobacco use and its  
4 treatment among young people in mental health settings: A qualitative analysis. *Nicotine Tob Res.*  
5 2013;15(8):1427-35.  
6 104. Orleans CT, Hutchinson D. Tailoring nicotine addiction treatments for chemical dependency  
7 patients. *J Subst Abuse Treat.* 1993;10(2):197-208. Epub 1993/03/01.  
8 105. Ratschen E, Britton J, Doody G, McNeill A. Smoking attitudes, behaviour and nicotine  
9 dependence among mental health acute inpatients: an exploratory study. *Int J Soc Psychiatry.*  
10 2010;56(2):107-18. Epub 2010/03/09.  
11 106. Arnsten JH, Reid K, Bierer M, Rigotti N. Smoking behavior and interest in quitting among  
12 homeless smokers. *Addict Behav.* 2004;29(6):1155-61. Epub 2004/07/09.  
13 107. Connor SE, Cook RL, Herbert MI, Neal SM, Williams JT. Smoking cessation in a homeless  
14 population: there is a will, but is there a way? *J Gen Intern Med.* 2002;17(5):369-72. Epub  
15 2002/06/06.  
16 108. Okuyemi KS, Caldwell AR, Thomas JL, Born W, Richter KP, Nollen N, et al. Homelessness and  
17 smoking cessation: insights from focus groups. *Nicotine Tob Res.* 2006;8(2):287-96. Epub  
18 2006/06/13.  
19 109. Dickens GL S, JH, Haw, CM. . Smoking in a forensic psychiatric service: a survey of inpatients'  
20 views. *J Psychiatr Ment Health Nurs.* 2005;12(6):672-8; quiz 8.  
21 110. Richmond R, Butler T, Wilhelm K, Wodak A, Cunningham M, Anderson I. Tobacco in prisons:  
22 a focus group study. *Tob Control.* 2009;18(3):176-82. Epub 2009/02/04.  
23 111. Lewis S, Russell A. Young smokers' narratives: public health, disadvantage and structural  
24 violence. *Sociol Health Illn.* 2013;35(5):746-60.  
25 112. Garner L, Ratschen E. Tobacco smoking, associated risk behaviours, and experience with  
26 quitting: a qualitative study with homeless smokers addicted to drugs and alcohol. *BMC Public*  
27 *Health.* 2013;13:951. Epub 2013/10/12.  
28 113. Patten CA. Tobacco cessation intervention during pregnancy among Alaska Native women. *J*  
29 *Cancer Educ.* 2012;27 Suppl 1:S86-90. Epub 2012/02/09.  
30 114. Bott MJ, Cobb AK, Scheibmeir MS, O'Connell KA. Quitting: Smokers Relate their Experiences.  
31 *Qual Health Res.* 1997;7(2):255-69.  
32 115. File SE, Dinnis AK, Heard JE, Irvine EE. Mood differences between male and female light  
33 smokers and nonsmokers. *Pharmacol Biochem Behav.* 2002;72(3):681-9. Epub 2002/08/15.  
34 116. Hajek P, Taylor T, McRobbie H. The effect of stopping smoking on perceived stress levels.  
35 *Addiction.* 2010;105(8):1466-71. Epub 2010/06/10.  
36 117. Mulder I, Tjhuis M, Smit HA, Kromhout D. Smoking cessation and quality of life: the effect of  
37 amount of smoking and time since quitting. *Prev Med.* 2001;33(6):653-60. Epub 2001/11/22.  
38 118. Carmody TP. Affect regulation, nicotine addiction, and smoking cessation. *J Psychoactive*  
39 *Drugs.* 1992;24(2):111-22. Epub 1992/04/01.  
40 119. DiFranza JR, Wellman RJ. A sensitization-homeostasis model of nicotine craving, withdrawal,  
41 and tolerance: integrating the clinical and basic science literature. *Nicotine Tob Res.* 2005;7(1):9-26.  
42 Epub 2005/04/05.  
43 120. Parrott AC. Does cigarette smoking cause stress? *Am Psychol.* 1999;54(10):817-20. Epub  
44 1999/11/30.  
45 121. Browning KK, Ferketich AK, Salsberry PJ, Wewers ME. Socioeconomic disparity in provider-  
46 delivered assistance to quit smoking. *Nicotine Tob Res.* 2008;10(1):55-61. Epub 2008/01/12.  
47 122. Aveyard P, Begh R, Parsons A, West R. Brief opportunistic smoking cessation interventions: a  
48 systematic review and meta-analysis to compare advice to quit and offer of assistance. *Addiction.*  
49 2012;107(6):1066-73. Epub 2011/12/20.  
50 123. Stead LF, Buitrago D, Preciado N, Sanchez G, Hartmann-Boyce J, Lancaster T. Physician  
51 advice for smoking cessation. *Cochrane Database Syst Rev.* 2013;5:CD000165. Epub 2013/06/04.  
52  
53  
54  
55  
56  
57  
58  
59  
60

- 1  
2  
3 124. Stead M, Angus K, Holme I, Cohen D, Tait G, Team PER. Factors influencing European GPs'  
4 engagement in smoking cessation: a multi-country literature review. *Br J Gen Pract*.  
5 2009;59(566):682-90. Epub 2009/08/14.  
6 125. Bryant J, Bonevski B, Paul C, Hull P, O'Brien J. Implementing a smoking cessation program in  
7 social and community service organisations: a feasibility and acceptability trial. *Drug Alcohol Rev*.  
8 2012;31(5):678-84. Epub 2011/12/08.  
9 126. Christiansen BA, Brooks M, Keller PA, Theobald WE, Fiore MC. Closing tobacco-related  
10 disparities: Using community organizations to increase consumer demand. *Am J Prev Med*.  
11 2010;38(3 Suppl):S397-402. Epub 2010/03/05.  
12 127. Bell K, Salmon A, Bowers M, Bell J, McCullough L. Smoking, stigma and tobacco  
13 'denormalization': Further reflections on the use of stigma as a public health tool. A commentary on  
14 *Social Science & Medicine's Stigma, Prejudice, Discrimination and Health Special Issue (67: 3)*. *Soc Sci*  
15 *Med*. 2010;70(6):795-9; discussion 800-1. Epub 2010/01/02.  
16 128. Lavack L. Denormalization of tobacco in Canada. *Social Marketing Quarterly*. 1999;5(3):82-5.  
17 129. El-Guebaly N, Cathcart J, Currie S, Brown D, Gloster S. Public health and therapeutic aspects  
18 of smoking bans in mental health and addiction settings. *Psychiatr Serv*. 2002;53(12):1617-22. Epub  
19 2002/12/04.  
20 130. Williams JM, Ziedonis D. Addressing tobacco among individuals with a mental illness or an  
21 addiction. *Addict Behav*. 2004;29(6):1067-83. Epub 2004/07/09.  
22 131. Ziedonis DM, Guydish J, Williams J, Steinberg M, Foulds J. Barriers and solutions to  
23 addressing tobacco dependence in addiction treatment programs. *Alcohol Res Health*.  
24 2006;29(3):228-35. Epub 2007/03/22.  
25 132. Frohlich KL, Mykhalovskiy E, Poland BD, Haines-Saah R, Johnson J. Creating the socially  
26 marginalised youth smoker: the role of tobacco control. *Sociol Health Illn*. 2012;34(7):978-93. Epub  
27 2012/03/06.  
28 133. Cosh S, Maksimovic L, Ettridge K, Copley D, Bowden JA. Aboriginal and Torres Strait Islander  
29 utilisation of the Quitline service for smoking cessation in South Australia. *Australian Journal of*  
30 *Primary Health*. 2013;19(2):113-8.  
31 134. Bramley D, Riddell T, Whittaker R, Corbett T, Lin RB, Wills M, et al. Smoking cessation using  
32 mobile phone text messaging is as effective in Maori as non-Maori. *N Z Med J*.  
33 2005;118(1216):U1494. Epub 2005/06/07.  
34 135. Daley CM, James AS, Barnoskie RS, Segraves M, Schupbach R, Choi WS. "Tobacco has a  
35 purpose, not just a past": Feasibility of developing a culturally appropriate smoking cessation  
36 program for a pan-tribal native population. *Med Anthropol Q*. 2006;20(4):421-40. Epub 2007/01/18.  
37 136. Richmond R, Indig D, Butler T, Wilhelm K, Archer V, Wodak A. A randomized controlled trial  
38 of a smoking cessation intervention conducted among prisoners. *Addiction*. 2013;108(5):966-74.  
39 Epub 2012/12/12.  
40 137. Richmond RL, Butler T, Belcher JM, Wodak A, Wilhelm KA, Baxter E. Promoting smoking  
41 cessation among prisoners: feasibility of a multi-component intervention. *Aust N Z J Public Health*.  
42 2006;30(5):474-8. Epub 2006/11/01.  
43 138. Siru R, Hulse GK, Tait RJ. Assessing motivation to quit smoking in people with mental illness:  
44 a review. *Addiction*. 2009;104(5):719-33. Epub 2009/05/06.  
45 139. Dani JA, Harris RA. Nicotine addiction and comorbidity with alcohol abuse and mental illness.  
46 *Nat Neurosci*. 2005;8(11):1465-70. Epub 2005/10/28.  
47 140. Lawn S, Hersh D, Ward PR, Tsourtos G, Muller R, Winefield A, et al. 'I just saw it as something  
48 that would pull you down, rather than lift you up': resilience in never-smokers with mental illness.  
49 *Health Educ Res*. 2011;26(1):26-38. Epub 2010/11/11.  
50 141. Shenton AK. Strategies for ensuring trustworthiness in qualitative research projects.  
51 *Education for Information*. 2004;22(2):63-75.  
52  
53  
54  
55  
56  
57  
58  
59  
60

- 1  
2  
3 142. Ward PR, Muller R, Tsourtos G, Hersh D, Lawn S, Winefield AH, et al. Additive and  
4 subtractive resilience strategies as enablers of biographical reinvention: a qualitative study of ex-  
5 smokers and never-smokers. *Soc Sci Med*. 2011;72(7):1140-8. Epub 2011/03/08.  
6  
7 143. McGee R, Williams S, Nada-Raja S, Olsson CA. Tobacco Smoking in Adolescence Predicts  
8 Maladaptive Coping Styles in Adulthood. *Nicotine Tob Res*. 2013;15(12):1971-7.  
9  
10 144. Gruskin EP, Greenwood GL, Matevia M, Pollack LM, Bye LL. Disparities in smoking between  
11 the lesbian, gay, and bisexual population and the general population in California. *Am J Public*  
12 *Health*. 2007;97(8):1496-502. Epub 2007/06/30.  
13  
14 145. Weber MF, Banks E, Sitas F. Smoking in migrants in New South Wales, Australia: Report on  
15 data from over 100 000 participants in the 45 and Up Study. *Drug Alcohol Rev*. 2011;30(6):597-605.  
16  
17 146. Substance Abuse and Mental Health Services Administration OoAS. Results from the 2007  
18 National Survey on Drug Use and Health: National Findings Rockville, MD.: 2008 Contract No.: DHHS  
19 Publication No. SMA 08-4343.  
20  
21 147. Fazel S, Khosla V, Doll H, Geddes J. The prevalence of mental disorders among the homeless  
22 in western countries: systematic review and meta-regression analysis. *PLoS Med*. 2008;5(12):e225.  
23 Epub 2008/12/05.  
24  
25 148. West R, McEwen A, Bolling K, Owen L. Smoking cessation and smoking patterns in the  
26 general population: a 1-year follow-up. *Addiction*. 2001;96(6):891-902. Epub 2001/06/12.  
27  
28  
29  
30  
31  
32  
33  
34  
35  
36  
37  
38  
39  
40  
41  
42  
43  
44  
45  
46  
47  
48  
49  
50  
51  
52  
53  
54  
55  
56  
57  
58  
59  
60

1  
2  
3 **Perceived barriers to smoking cessation in selected vulnerable groups: A systematic**  
4 **review of the qualitative and quantitative literature.**  
5  
6  
7  
8

9 **Twyman, Laura,<sup>1\*</sup> Bonevski, Billie,<sup>1</sup> Paul, Chris,<sup>2</sup> & Bryant, Jamie.<sup>2</sup>**  
10

11 **<sup>1</sup>School of Medicine and Public Health, Faculty of Health, University of Newcastle,**  
12 **Callaghan, NSW 2308, Australia.**  
13

14 **<sup>2</sup> Priority Research Centre for Health Behaviour and Health Behaviour Research**  
15 **Group, University of Newcastle & Hunter Medical Research Institute**  
16  
17

18 **\*Correspondence to: Laura Twyman. Email: [Laura.Twyman@newcastle.edu.au](mailto:Laura.Twyman@newcastle.edu.au)**  
19

20 **Contact address: Level 5 McAuley building Calvary Mater Hospital Waratah Postcode:**  
21 **2298 New South Wales Australia**  
22

23 **Keywords:** smoking cessation, vulnerable populations, disadvantage, barriers, systematic  
24 **review**  
25

26 **Word count:** 5720  
27  
28  
29  
30  
31  
32  
33  
34  
35  
36  
37  
38  
39  
40  
41  
42  
43  
44  
45  
46  
47  
48  
49  
50  
51  
52  
53  
54  
55  
56  
57  
58  
59  
60

## ABSTRACT

**Objectives:** To identify barriers which are common and unique to six selected vulnerable groups: low socioeconomic status; Indigenous; mental illness and substance abuse; homeless; prisoners and at-risk youth.

**Design:** A systematic review was carried out to identify the perceived barriers to smoking cessation within six vulnerable groups.

**Data sources:** Medline, EMBASE, CINAHL and PsycInfo were searched using keywords and MeSH terms from each database's inception published prior to March 2014.

**Study selection:** Studies that provided either qualitative or quantitative (i.e. longitudinal, cross-sectional or cohort surveys) descriptions of self-reported perceived barriers to quitting smoking in one of the six aforementioned vulnerable groups were included.

**Data extraction:** Two authors independently assessed studies for inclusion and extracted data.

**Results:** 65 eligible papers were identified: 24 with low socioeconomic groups, 16 with Indigenous groups, 18 involving people with a mental illness, three with homeless groups, two involving prisoners and one involving at risk youth. One study identified was carried out with participants who were homeless and addicted to alcohol and/or other drugs. Barriers common to all vulnerable groups included: smoking for stress management, lack of support from health and other service providers and the high prevalence and acceptability of smoking in vulnerable communities. Unique barriers were identified for people with a mental illness (e.g. maintenance of mental health), Indigenous groups (e.g. cultural and historical norms), prisoners (e.g. living conditions), people who are homeless (e.g. competing priorities) and at risk youth (e.g. high accessibility of tobacco).

**Conclusions:** Vulnerable groups experience common barriers to smoking cessation, in addition to barriers that are unique to specific vulnerable groups. Individual-level and

1  
2  
3 community and social network-level interventions are priority areas for future smoking  
4  
5 cessation interventions within vulnerable groups.  
6

7 **Trial registration:** A protocol for this review has been registered with PROSPERO  
8  
9 International Prospective Register of Systematic Reviews [Identifier: CRD42013005761].  
10  
11

## 12 13 14 298

### 15 16 17 18 Strengths:

- 19  
20 • This study provides a valuable synthesis of the literature examining the perceived  
21  
22 barriers to smoking cessation common and unique across six vulnerable groups.  
23

### 24 25 Limitations:

- 26  
27 • While the overall quality of the studies included in this review was acceptable, most  
28  
29 studies failed to provide information regarding the trustworthiness (qualitative  
30  
31 studies) or reliability and validity (quantitative studies) of the research.  
32  
33  
34  
35  
36  
37  
38  
39  
40  
41  
42  
43  
44  
45  
46  
47  
48  
49  
50  
51  
52  
53  
54  
55  
56  
57  
58  
59  
60

## INTRODUCTION

Tobacco use is the leading global cause of avoidable death worldwide (1) and a key modifiable risk factor for the development of a range of diseases, including cardiovascular disease, chronic obstructive pulmonary disease, and some cancers (1).

The prevalence of tobacco smoking is inversely related to socioeconomic position (SEP) in high-income countries (1). For example, in 2010 in Australia, the prevalence of smoking was 24.6% in the lowest socioeconomic areas compared to 12.5% in the highest socioeconomic areas (2). The highest rates of smoking are evident among those who, in addition to low socioeconomic status, have other characteristics that distinguish them from the general population such as Indigenous groups (31% - 51.8%) (3-5); people with a mental illness (31.7-32.4%) (6), those with substance abuse disorders (77%) (7); the homeless (73%) (8); and prisoners (78% - 84%) (9, 10). These groups were selected because they represent a large proportion of those classified as vulnerable to socioeconomic disadvantage (11). It should be noted that although members of vulnerable groups are more likely to be socioeconomically disadvantaged, not all members are. For the purposes of this review, vulnerable groups are defined as groups that are more likely to experience social and material disadvantage due to lower income, cultural differences, and social exclusion (12).

Conflicting evidence exists regarding whether the rates of quit attempts in low SEP are similar to (13, 14) or lower (15-18) than the rates made by smokers in higher SEP. However, the success rate of quit attempts for lower SEP individuals is much lower than the success rate in higher SEP counterparts (14, 19).

There are many reasons quit success may be lower in vulnerable groups(20, 21). Within the health behaviour literature, factors that prevent an individual from undertaking health behaviour change have been referred to as barriers. Barriers are often conceptualised as either structural or individual psychosocial factors (22). Structural barriers include

1  
2  
3 systems, organisations and the relationship between systems and individuals, for example  
4  
5 lack of accessible smoking cessation programs. Individual barriers refer to the subjective  
6  
7 experience of the individual, for example physical addiction to nicotine.  
8

9  
10 This definition of barriers is congruent with the social determinants of health  
11  
12 framework (SDHF)(23). The SDHF holds that an individual's health is influenced by factors  
13  
14 across many levels, from individual genetic and physical characteristics, social and  
15  
16 community networks, to broader influences of culture, socioeconomic determinants and the  
17  
18 environment. This framework has been used to examine the determinants of health  
19  
20 inequities(24). Because the SDHF classifies determinants of health as individual, social and  
21  
22 broader cultural and environmental factors, it also allows the identification of distinct levels  
23  
24 of intervention for health policies.  
25  
26

27  
28 Within the general population, cross-sectional studies have found variation in the  
29  
30 most commonly reported barriers to cessation. Enjoyment (79%)(25); cravings (75%) (25);  
31  
32 and stress management (36% - 63%) (25, 26) are the most frequently reported barriers.  
33  
34 Irritability (39% - 42%) (27); habit (39%) (26); withdrawal symptoms (28% - 48%) (25, 26);  
35  
36 fear of failure (17% - 32%) (25, 26) and concern about weight gain (27%-34%) (25-27) are  
37  
38 also identified as barriers to cessation.  
39

40  
41 The effect of socioeconomic position on perceived barriers to quitting was examined  
42  
43 in a representative sample (n = 2,133) in the United Kingdom (28). Enjoyment (51%) and  
44  
45 stress relief (47%) were the most frequently endorsed motives for continuing to smoke across  
46  
47 the sample; however as socioeconomic position decreased, the likelihood of reporting stress  
48  
49 management and avoiding boredom as motives to continue to smoke increased. This  
50  
51 suggests that smokers from vulnerable groups may experience barriers to smoking cessation  
52  
53 differently than those in the general population (28).  
54  
55  
56  
57  
58  
59  
60



1  
2  
3 Smoking in vulnerable groups is known to be influenced and perpetuated by a  
4 complex range of social, cultural and environmental factors (29) including high acceptability  
5 of smoking (30) and more tobacco retail outlets in low socioeconomic areas (31). Two  
6  
7  
8  
9  
10 previous studies have reviewed the literature to examine barriers to quitting smoking amongst  
11 vulnerable groups. One focussed on Aboriginal pregnant women (32), and one focussed on  
12 the barriers to smoking cessation service utilisation amongst low income smokers (33). Both  
13 reviews found pro-smoking social norms, inadequate knowledge regarding smoking related  
14 risks, and lack of access to appropriate cessation services inhibited participants' ability to  
15 quit.  
16  
17  
18  
19  
20  
21  
22

23 As the term vulnerable applies to multiple discrete groups, it is important to  
24 understand which barriers (if any) are unique for example, cultural factors that inhibit  
25 smoking cessation may be unique to some Indigenous groups (32). A systematic examination  
26 of potential unique barriers would be valuable in order to develop and deliver appropriate  
27 suites of intervention techniques for specific vulnerable groups.  
28  
29  
30  
31  
32  
33

34 Understanding the perceived barriers to quitting is important in order to better  
35 understand smoking, relapse and quitting related behaviours, to inform appropriate policy,  
36 and facilitate the development of effective tailored smoking cessation interventions. Given  
37 the exceptionally high smoking rates and low quit success amongst vulnerable groups, there  
38 is a critical need for a systematic and comprehensive review of the literature of the perceived  
39 barriers to quitting smoking amongst vulnerable smokers.  
40  
41  
42  
43  
44  
45  
46  
47  
48

## 49 Aims

50 This systematic review aims to provide a comprehensive synthesis of the self-reported  
51 barriers to quitting smoking within six vulnerable groups by reviewing the qualitative and  
52 quantitative literature. The review will focus on the perceived, self-reported barriers to  
53  
54  
55  
56  
57  
58  
59  
60

1  
2  
3 smoking cessation in six selected vulnerable groups: low socioeconomic status (low SES),  
4  
5 Indigenous, mental illness and substance abuse, homeless, prisoners, and at-risk youth. These  
6  
7 groups were selected because they represent a large proportion of those classified as  
8  
9 vulnerable to socioeconomic disadvantage (11); who exhibit smoking rates higher than that of  
10  
11 the general population (2-10); and who are identified as priority groups targeted for smoking  
12  
13 cessation programs and policies by peak health authorities (34-36). Specifically, the review  
14  
15 aims to:  
16  
17

- 18  
19  
20 a) identify barriers which are common across all vulnerable groups included in the review  
21  
22 and  
23  
24 b) identify barriers that may be unique to specific groups.  
25  
26  
27

28  
29 The results of the review will be used to develop a practical model to help understand the  
30  
31 barriers to quitting amongst vulnerable groups and to aid smoking cessation intervention  
32  
33 development.  
34  
35

## 36 37 38 **METHOD**

### 39 40 **Study design**

41  
42 Guidelines for the reporting of systematic reviews (PRISMA) (37) and qualitative  
43  
44 synthesis (ENTREQ) (38) were followed. A protocol for this review was registered with  
45  
46 PROSPERO International Prospective Register of Systematic Reviews [Identifier:  
47  
48 CRD42013005761].  
49  
50  
51  
52  
53  
54  
55  
56  
57  
58  
59  
60

## Databases and search

Medline, EMBASE, CINAHL and PsycInfo were searched using keywords and MeSH terms from each database's inception published prior to March 2014. The reference lists of key articles and reviews were also manually searched in order to identify any other relevant articles. An extensive list of search terms was used in order to ensure that as many relevant articles as possible were captured (See Table 1).

Table 1. Search strategy

|    |                               |
|----|-------------------------------|
| 1  | Tobacco/                      |
| 2  | Tobacco use/                  |
| 3  | Tobacco use cessation/        |
| 4  | Tobacco smoking/              |
| 5  | Smoking/                      |
| 6  | Smoking Cessation/            |
| 7  | Tobacco use cessation/        |
| 8  | Tobacco dependence/           |
| 9  | Cigarette smoking/            |
| 10 | Or/1-9                        |
| 11 | Homeless youth/               |
| 12 | Homeless persons/             |
| 13 | Housing/                      |
| 14 | Homeless mentally ill/        |
| 15 | Homelessness or homeless/     |
| 16 | Community programs/           |
| 17 | Or/11-16                      |
| 18 | Prisoner or Prisons/          |
| 19 | Correctional Health Services/ |
| 20 | Correctional facilities/      |
| 21 | Jail/                         |
| 22 | Or/18-21                      |
| 23 | Anxiety/                      |
| 24 | Depression/                   |
| 25 | Schizophrenia/                |
| 26 | Mentally Ill persons/         |
| 27 | Mental health/                |
| 28 | Mental illness/               |
| 29 | Mental disorder/              |
| 30 | Mental disease/               |
| 31 | Mental patient/               |
| 32 | Mental health services/       |
| 33 | Substance-related disorders/  |
| 34 | Drug use/                     |
| 35 | Drug abuse/                   |
| 36 | Alcohol-related disorders/    |
| 37 | Or/23-36                      |

1  
2  
3  
4  
5  
6  
7  
8  
9  
10  
11  
12  
13  
14  
15  
16  
17  
18  
19  
20  
21  
22  
23  
24  
25  
26  
27  
28  
29  
30  
31  
32  
33  
34  
35  
36  
37  
38  
39  
40  
41  
42  
43  
44  
45  
46  
47  
48  
49  
50  
51  
52  
53  
54  
55  
56  
57  
58  
59  
60

---

|    |                                                                                     |
|----|-------------------------------------------------------------------------------------|
| 38 | Adolescent behaviour/                                                               |
| 39 | Juvenile delinquency/                                                               |
| 40 | Juvenile offenders/                                                                 |
| 41 | Disruptive Behaviors or disruptive behaviours/                                      |
| 42 | At-risk youth/                                                                      |
| 43 | At-risk young people/                                                               |
| 44 | Or/38-43                                                                            |
| 45 | Indigenous/                                                                         |
| 46 | Indigenous health/                                                                  |
| 47 | Indigenous peoples/                                                                 |
| 48 | Indigenous populations/                                                             |
| 49 | Aboriginal/                                                                         |
| 50 | Aboriginal and Torres Strait Islanders/                                             |
| 51 | Inuits/                                                                             |
| 52 | Eskimo/                                                                             |
| 53 | Alaska Native/                                                                      |
| 54 | Indians/                                                                            |
| 55 | Native American/                                                                    |
| 56 | Native Hawaiian/                                                                    |
| 57 | American Indian/                                                                    |
| 58 | Indians, North American/                                                            |
| 59 | Indians, South American/                                                            |
| 60 | Indians, Central American/                                                          |
| 61 | First Nations/                                                                      |
| 62 | Pacific Islander/                                                                   |
| 63 | Maori/                                                                              |
| 64 | Oceanic ancestry group/                                                             |
| 65 | American Native Continental Ancestry Group/                                         |
| 66 | Or/45-65                                                                            |
| 67 | Poverty                                                                             |
| 68 | Social status                                                                       |
| 69 | Social class                                                                        |
| 70 | Low income population                                                               |
| 71 | Inequalities                                                                        |
| 72 | Socioeconomic status                                                                |
| 73 | Socioeconomic factors                                                               |
| 74 | Disadvantaged                                                                       |
| 75 | Underserved                                                                         |
| 76 | Or/67-75                                                                            |
| 77 | Related to smoking cessation/quitting smoking                                       |
| 78 | Correlated with smoking cessation/quitting smoking                                  |
| 79 | Associated with smoking cessation/quitting smoking                                  |
| 80 | That affect smoking cessation/quitting smoking                                      |
| 81 | That inhibit smoking cessation/quitting smoking                                     |
| 82 | That prevent smoking cessation/quitting smoking                                     |
| 83 | Barriers to smoking cessation/quitting smoking                                      |
| 84 | Factor\$ or Determinant\$ or Variable\$ or Covariable\$ or Predictor\$ or Barrier\$ |
| 85 | Or/77-84                                                                            |
| 86 | 10 AND 85 AND 17                                                                    |
| 87 | 10 AND 85 AND 22                                                                    |
| 88 | 10 AND 85 AND 37                                                                    |
| 89 | 10 AND 85 AND 44                                                                    |

---

---

|    |                  |
|----|------------------|
| 90 | 10 AND 85 AND 66 |
| 91 | 10 AND 85 AND 76 |

---

### **Inclusion and exclusion criteria**

Studies that provided either qualitative or quantitative (i.e. longitudinal, cross-sectional or cohort surveys) descriptions of perceived self-reported barriers to quitting smoking in low SES groups, Indigenous groups, people with a mental illness or substance abuse problems, people who are homeless, prisoners or at-risk youth were included. See Table 2 for definitions used as inclusion criteria for each vulnerable group. Only studies carried out in high income countries were included as middle and low income countries may present different contextual, political and economic barriers which require separate consideration. Only studies published in English were included as resources required to translate articles were beyond the scope of this review. Intervention studies were excluded, as barriers discussed within these studies related to use of the intervention being tested and not barriers to smoking cessation per se. Studies examining factors associated with quit attempts or success were excluded unless they included results on the perceived barriers self-reported by participants from vulnerable groups. Studies describing *provider* reports of the barriers to the provision of smoking cessation support or treatment, and unpublished grey literature, were also excluded. There were no cut offs for sample size.

Table 2. Inclusion criteria definitions of each group.

| Group                          | Definition                                                                                                                                                                                                                                                                                                                        |
|--------------------------------|-----------------------------------------------------------------------------------------------------------------------------------------------------------------------------------------------------------------------------------------------------------------------------------------------------------------------------------|
| Low socioeconomic status (SES) | Because definitions of low SES vary across high income countries this study used an inclusive definition of low SES. Studies were included if they described participants as being low SES and gave at least one measure of SES. This measure could be income (above/below poverty level); address in deprived neighbourhood etc. |
| Indigenous groups              | The following definition was used to define potential Indigenous studies in accordance with previous studies (39): “the experiences shared by a group of people who have inhabited a country for thousands of years, which often contrast with those of other groups residing in the same country for a few hundred years” (40).  |
| Mental Illness                 | People with a mental illness were defined as individuals who had been diagnosed with a mental illness, severe mental illness or were described as inpatients or outpatients in a mental health rehabilitation facility. Substance use disorders were also included. All mental illnesses were included.                           |
| At-risk youth                  | At-risk youth were defined as individuals under the age of 21 who have experienced or are experiencing; problems at school; physical, sexual or psychological abuse; mental or physical health problems; economic disadvantage or who have committed a violent or delinquent act (USA Code).                                      |
| Prisoners                      | Prisoners included both those currently incarcerated and those ex-prisoners living in the community.                                                                                                                                                                                                                              |
| Homeless                       | Homeless individuals were defined as those individuals described as meeting national criteria for homelessness or those individuals accessing services provided to homeless persons.                                                                                                                                              |
| Smoker                         | Smokers were defined as self-reported daily or occasional cigarette smokers. Studies that also assessed ex-smokers were only included if the majority of participants were current smokers, or if the results were reported by smoking status. Studies were excluded if they focussed solely on ex-smokers or non-smokers.        |

### Data extraction

The titles and abstracts of retrieved publications were assessed by one reviewer (LT) against eligibility criteria and excluded if they did not meet inclusion criteria. A second reviewer (a Research Assistant) independently assessed 20% of the returned abstracts for inclusion with 100% agreement between reviewers. Data from included journal articles was extracted into summary tables independently by one reviewer (LT) and a random 20% checked by a second (Research Assistant). Agreement was again high (97%). Discrepancies were settled by discussion between the reviewers. Data extracted from the articles included: study aims, setting, sample characteristics, response rates, study methodology, data analysis and the barriers identified. Barriers were defined as factors that prevented smoking cessation and/or quit attempts or were reported as primary reasons for continuing to smoke.

### Risk of bias in individual studies

Quality assessment was performed independently by all authors, with two reviewers per manuscript. The methodological quality of qualitative studies was assessed using the McMaster Qualitative Criteria Form (41). Quantitative studies were assessed using a tool adapted from the STROBE statement (42). As there is a lack of an agreed, valid and reliable measure to assess the quality of mixed methods studies (43), both the McMaster guidelines and the adapted quantitative framework were applied to the corresponding qualitative and quantitative components of any mixed methods studies identified.

### Synthesis of results

Results were synthesised by vulnerable group using narrative synthesis and inductive data analysis techniques. Narrative synthesis allows the examination of studies that are highly heterogeneous in their research questions, samples and methods (44, 45). In order to avoid

1  
2  
3 potential biases, care was taken to also identify points of difference between studies (46).  
4  
5 Where a barrier was reported in more than one study, this was recorded. In quantitative  
6  
7 studies, the proportion of respondents reporting each barrier was calculated. Barriers were  
8  
9 combined into categories and then classified using the SDHF (23). For the purposes of this  
10  
11 review, individual factors were defined as physical or psychological barriers to quitting  
12  
13 smoking: for example, the individual's level of nicotine dependence or motivation to quit.  
14  
15 Lifestyle factors were defined as health behaviours (including alcohol and other drug use)  
16  
17 that impeded an individual's ability to quit. Social and community networks were defined as  
18  
19 the impact of an individual's family and friend networks, and the wider community. Living  
20  
21 and working conditions encompassed factors including housing, health care, education and  
22  
23 employment. The final domain was the broader socioeconomic, cultural and environmental  
24  
25 background perceived to influence smoking cessation.  
26  
27  
28  
29  
30  
31

## 32 RESULTS

### 33 Search results

34  
35 After duplicates were removed, 21,767 studies were identified from electronic  
36  
37 searches and a further 27 from manual searches. Of those, 65 studies met inclusion criteria  
38  
39 and were included in the review (see Figure 1). Supplementary file 1 contains a list of full  
40  
41 text articles that were retrieved, reviewed and excluded as per the inclusion criteria. Two  
42  
43 systematic reviews concerning Indigenous Australian pregnant women (32) and pregnant  
44  
45 women (47); and two critical reviews providing summaries of the barriers to quitting (33, 48)  
46  
47 were also identified from hand searches.  
48  
49  
50  
51

### 52 Study characteristics

53  
54  
55  
56  
57  
58  
59  
60



1  
2  
3 The majority of studies (n = 24) identified barriers to smoking cessation in low SES groups  
4 (30, 49-71), Indigenous groups (n = 16) (72-87), and people with a mental illness (n = 18)  
5 (88-105) including two concerning those with substance use disorders (101, 104). Three  
6 studies reported barriers to quitting within the homeless (106-108) and two reported barriers  
7 within prisoner groups (109, 110). One study with at-risk youth was identified (111). Two  
8 other studies concerning Alaska Native participants (age range from 11 to 18) (86) and  
9 people with a mental illness (age range from 16 to 23) (103) included younger people as  
10 participants. One study was identified that was carried out with participants who were both  
11 homeless and addicted to drugs and/or alcohol (112). Since the study comprised participants  
12 that met criteria for inclusion in two of the vulnerable groups included in this review (both  
13 the homeless and mental illness/substance use groups) this study was included in a seventh  
14 category containing “multiple” participant groups. Supplementary files 2, 3 and 4 summarize  
15 the included quantitative, qualitative and mixed methods studies respectively. An overview of  
16 the characteristics of included studies can be found in Supplementary file 5.

### 36 **Quality assessment of qualitative studies**

37  
38 The results of the quality assessment of qualitative studies are presented in  
39 Supplementary file 6. Overall, the quality of studies varied widely. The majority of studies  
40 did not explicitly state their study design (n = 38); of those that did, most used Grounded  
41 Theory (57, 59, 61, 93, 98, 99). Most studies provided adequate descriptions of the study  
42 sites; participants; data collection methods and analysis techniques. Studies generally  
43 performed poorly when assessed on four components of trustworthiness, with only fifteen  
44 studies meeting all four criteria (credibility; transferability; dependability and confirmability)  
45 [41,44,48,50,58,60,64,65,68,69,72,73,75,76,84]. It should be noted that none of the mixed  
46  
47  
48  
49  
50  
51  
52  
53  
54  
55  
56  
57  
58  
59  
60

1  
2  
3 methods studies explicitly described their methodology as mixed methods nor did they report  
4  
5 integrating the qualitative and quantitative findings in a systematic way.  
6  
7

### 8 9 10 **Quality assessment of quantitative studies**

11  
12 The results of the quality assessment of quantitative studies are presented in  
13  
14 Supplementary file 7. Sample sizes in the quantitative studies ranged from 36 to 500  
15  
16 participants. Response rates ranged from 42% to over 97% (three studies did not provide  
17  
18 response rates) [70,91,92]. All but one study [81] clearly stated eligibility criteria. All studies  
19  
20 stated their outcome a priori and no conflicts of interest were identified. The validity and  
21  
22 reliability of survey measures used to assess barriers to cessation were reported in one study  
23  
24 [53]. Three studies employed techniques such as pilot testing and input from key stakeholders  
25  
26 in developing the tools used [53,77,95].  
27  
28  
29

### 30 31 32 **Perceived barriers to smoking cessation**

33  
34 The barriers to quitting smoking endorsed over multiple studies included: smoking for  
35  
36 stress management; enjoyment of smoking; addiction to nicotine; habit; social acceptability  
37  
38 of smoking; lack of support to quit and access to quit resources; boredom; stressful life  
39  
40 factors; pro-smoking living environments; smoking cultural norms and socioeconomic  
41  
42 disadvantage. Figure 2 demonstrates the barriers reported in this review categorised by the  
43  
44 SDHF. For brevity, the current results section will focus on those barriers that were common  
45  
46 across all groups and unique to certain vulnerable groups. Supplementary file 8 provides a  
47  
48 detailed description of all of the barriers identified in this review. Table 3 provides a  
49  
50 summary of the barriers extracted from the qualitative studies. References of studies that  
51  
52 report one or more barriers at a given level of the SDHF are included in Table 3. Table 4  
53  
54  
55  
56  
57  
58  
59  
60

1  
2  
3 provides a summary of the results of quantitative studies including the proportion of  
4  
5 participants endorsing the barrier and the study reference.  
6  
7

### 8 9 10 **Barriers common across all groups**

11  
12 Three barriers were present in all six vulnerable groups included in this review: 1)  
13 stress management, 2) lack of support to quit from health professionals and other service  
14 providers, and 3) high prevalence and acceptability of smoking within vulnerable  
15 communities.  
16  
17

18  
19  
20 Within the SDHF, stress management was categorised as an individual level barrier.  
21  
22 Forty qualitative studies identified stress management as a significant barrier to smoking  
23 cessation (50-56, 58, 59, 61-63, 65, 67-69, 72, 74, 75, 80, 81, 83, 84, 86, 87, 89, 90, 92, 93,  
24 95-97, 99, 100, 103, 105, 108, 110-112). Smoking was used as a coping mechanism (52, 58,  
25 62-65, 69, 74, 89, 90, 92, 97, 99) in reaction to daily stressors as well as the stress inherent in  
26 vulnerable lives. Three quantitative studies reported stress management as a barrier to  
27 quitting with Maori participants (48%) (79), participants with substance use disorders (39%)  
28 (104) and homeless participants (44%) (107). Of note, participants in two studies reported  
29 that smoking also directly contributed to the stress experienced by participants (51, 111).  
30 Participants also reported using smoking to manage their emotions and mood (58, 65, 72, 83,  
31 84, 90, 93, 98, 103, 113). Twenty three percent of participants from a Maori sample indicated  
32 managing emotions was a barrier to quitting (79), 42% of individuals with a substance use  
33 disorder (101).  
34  
35  
36  
37  
38  
39  
40  
41  
42  
43  
44  
45  
46  
47  
48

49  
50 High prevalence and acceptability of smoking within vulnerable communities was  
51 categorised as a community and social network level barrier. Eight qualitative (53, 54, 69, 75,  
52 79, 80, 98, 111) and four quantitative (60, 101, 107, 109) studies found that being around  
53 other smokers was a barrier to quitting. This finding is reinforced by participants describing  
54  
55  
56  
57  
58  
59  
60

1  
2  
3 the high prevalence of smoking amongst family and friends in 22 studies (30, 51, 52, 56, 62,  
4 68, 69, 72, 74, 76, 81, 83, 85-87, 90, 93, 95, 96, 103, 111, 112) and in the wider community  
5 in 18 studies (30, 51, 52, 56, 62, 66, 69, 72, 74, 76, 81, 83, 85-87, 93, 96, 112). Tobacco was  
6 readily available and easily accessible within vulnerable communities (51, 62, 66, 76, 83, 90,  
7 91, 111) and smoking was considered to be a highly acceptable (30, 79, 81-83, 85-87) and  
8 normalised behaviour (52, 56, 62, 66, 69, 79, 81-83, 85, 87).

9  
10  
11  
12  
13  
14  
15  
16 Lack of support to quit from health and other service providers to quit was also  
17 categorised as a social and community network barrier. Other service providers include  
18 management and staff in prisons, homeless shelters and organisations, and members of the  
19 community. Thirteen qualitative studies (52, 55, 56, 58, 74, 77, 83, 86, 91, 92, 95, 108, 112)  
20 and one quantitative study (109) reported a perceived lack of support from health  
21 professionals regarding smoking cessation. Cases of family members and health professionals  
22 actively discouraging quit attempts and encouraging maintenance of smoking due to concerns  
23 about the individual's mental health (92, 93, 95, 96, 112) or because smoking was perceived  
24 to be the individual's only source of enjoyment (54, 77, 79, 83) were reported. Three studies  
25 identified tobacco use by health professionals and others involved in the participants' care as  
26 a barrier to cessation (77, 95, 109). Over half (55.9%) of prisoners surveyed reported  
27 observing members of staff smoking as a barrier to quitting (109). Studies involving people  
28 with a mental illness and prisoners identified use of cigarettes in order to reward or punish  
29 behaviour by health professionals and other service providers (93, 95, 96, 110) as a barrier to  
30 quitting. Twenty-nine percent of prisoners also indicated that not receiving cessation support  
31 from prison staff prevented them from quitting smoking (109). Twenty-six percent of  
32 substance abusing individuals reported they did not have enough support to quit. One study  
33 involving at risk youth identified smoking being unaddressed by teachers and members of the  
34 police force as a barrier to smoking cessation (111).

Table 3. A summary of the self-reported barriers to smoking cessation – qualitative and mixed methods studies by vulnerable group.

| Barrier                                 | Low SES groups (n = 22)         | Indigenous groups (n = 16)           | People with a mental illness (n=13) | Homeless groups (n = 3) | Prisoner groups (n = 2) | At risk youth (n = 1) | Multiple groups (n = 1) |
|-----------------------------------------|---------------------------------|--------------------------------------|-------------------------------------|-------------------------|-------------------------|-----------------------|-------------------------|
| <b>Individual and lifestyle factors</b> |                                 |                                      |                                     |                         |                         |                       |                         |
| Stress management                       | (50-59, 61-63, 65-69)           | (72, 74, 75, 79, 81, 83, 84, 86, 87) | (89, 90, 92, 93, 95-98, 105)        | (108)                   | (110)                   | (111)                 | (112)                   |
| Enjoyment                               | (50, 54-56, 59, 62, 63, 65, 67) | (79, 81-83)                          | (89, 90, 92-94, 97, 98, 105)        |                         |                         | (111)                 |                         |
| Addiction                               | (49, 50, 54, 57, 59, 67-69)     | (72, 74, 75, 81, 83, 84, 86)         | (90-92, 98)                         |                         |                         |                       |                         |
| Habit                                   | (50, 57, 65, 68)                | (75, 79, 83, 84)                     | (92, 105)                           |                         |                         |                       |                         |
| Mental health benefits                  | (58, 67)                        | (74)                                 | (89, 91-99)                         |                         |                         |                       |                         |
| Weight gain                             | (30, 49, 52-54, 64, 67)         | (72, 74, 84)                         | (91, 98)                            |                         |                         |                       |                         |
| Competing priorities                    | (56, 63)                        | (74, 75, 87)                         | (89, 91, 98, 99)                    | (108)                   |                         |                       |                         |
| Rationalisations                        | (54-56, 58, 61, 67)             | (74, 78, 82, 87)                     | (89, 97)                            |                         |                         |                       |                         |
| Other substance use                     | (49, 56, 59, 62)                | (74, 76, 81, 84)                     | (89)                                |                         |                         |                       | (112)                   |
| Autonomy                                | (56, 58, 68)                    | (83)                                 | (93, 97-99)                         |                         |                         |                       |                         |
| Low confidence                          | (52, 53, 56, 63, 67, 69)        | (73, 84)                             | (92, 96, 98)                        |                         |                         |                       | (112)                   |
| Cognitive benefits                      | (51)                            | (83)                                 | (93-95)                             |                         |                         |                       |                         |
| Loneliness                              | (52, 59, 65)                    |                                      | (93, 97, 98)                        |                         |                         |                       |                         |
| Low risk of harm                        | (58)                            | (87)                                 | (95, 97)                            |                         |                         |                       |                         |
| Low motivation                          |                                 |                                      | (92, 94, 97, 98)                    |                         |                         |                       |                         |
| Past failed attempts                    | (61)                            | (74)                                 |                                     |                         |                         |                       |                         |
| Positive smoker image                   | (30, 57)                        |                                      | (97)                                |                         |                         |                       |                         |
| <b>Social and community networks</b>    |                                 |                                      |                                     |                         |                         |                       |                         |
| Prevalence and acceptability            | (30, 51-54, 56, 62, 66, 68, 69) | (72, 74, 76, 79, 83, 85-87)          | (90, 91, 93, 95, 96, 105)           | (108)                   | (110)                   | (111)                 | (112)                   |
| Lack of social                          | (30, 49, 54-56, 58, 64,         | (74, 75, 77, 79, 83, 84)             | (91, 94, 98)                        | (108)                   |                         |                       |                         |

|                                                          |                              |                           |                              |       |       |       |       |
|----------------------------------------------------------|------------------------------|---------------------------|------------------------------|-------|-------|-------|-------|
| support                                                  | 67-69)                       |                           |                              |       |       |       |       |
| Social activity                                          | (30, 49, 53, 57, 62)         | (73-75, 79, 85, 87)       | (89, 90, 92, 93, 95, 97, 98) |       |       |       |       |
| Lack of health and other professional support            | (52, 54-56, 58)              | (74, 77, 79, 83, 86)      | (91-93, 95, 96)              | (108) | (110) | (111) | (112) |
| <b>Living and working conditions</b>                     |                              |                           |                              |       |       |       |       |
| Access to quit resources                                 | (52, 55, 56, 61-64)          | (72-74, 78, 81, 85, 86)   | (93, 96, 98)                 | (108) | (110) |       |       |
| Boredom                                                  | (50-52, 54-56, 59, 65)       | (75, 86)                  | (90, 94, 95, 97, 99)         | (108) | (110) |       |       |
| Concerns regarding treatment                             | (50, 52, 56, 58, 61-63, 69)  | (72-74, 77, 78, 81, 86)   | (91, 93, 96, 105)            | (108) |       |       |       |
| Stressful factors                                        | (56, 58, 59, 62, 63, 65, 68) | (74, 75, 85)              |                              |       | (110) |       |       |
| Living and working circumstances                         | (30, 54, 58)                 | (74)                      | (96)                         |       |       |       |       |
| <b>Cultural, socioeconomic and environmental factors</b> |                              |                           |                              |       |       |       |       |
| Cultural norms                                           | (56, 62)                     | (72-75, 78, 81-83, 85-87) | (93, 94, 98)                 |       | (110) |       |       |
| Socioeconomic factors                                    | (65)                         |                           | (97)                         |       |       |       |       |

### Barriers unique to certain vulnerable groups

Indigenous; prisoner; mentally ill, homeless, and at risk youth reported unique barriers to smoking cessation. Racism, historical factors (74, 75, 85), ceremonial use of tobacco (72, 73, 82, 85, 86), cultural values that promote sharing, kinship, and reciprocity (83), cultural values of pride, independence and self-reliance that affect help seeking behaviour (81, 82), cultural values concerning health and privacy (84), and maintenance of cultural identity (73-75, 82, 83, 85) were identified as barriers within Indigenous groups. Smoking cessation could therefore exclude an individual from fully participating in their culture or potentially challenge family, personal or community relationships.

1  
2  
3 Living environments and the stressful context of prison presented unique barriers for  
4  
5 prisoners, including social isolation, anxiety regarding legal matters, transfers to other  
6  
7 prisons, use of cigarettes as a currency, use of cigarettes as a way to reward or punish  
8  
9 behaviour, bullying, missing family and restricted movement throughout the day (110).  
10

11 Low levels of motivation (92, 94, 97, 98), concerns about ability of cessation services  
12  
13 to handle mental health issues (91, 93, 96), identity and belonging (93, 94, 98) and symptom  
14  
15 management (88-98) were barriers for people with mental illness.  
16  
17

18 Competing needs and prioritising need to find shelter/place to live were unique  
19  
20 barriers for individual who were homeless (108). Very high levels of accessibility of  
21  
22 cigarettes, and the regular practice of selling cigarettes to those under 18 years of age were  
23  
24 identified by one study with at risk youth as a unique barrier (104).  
25  
26  
27  
28  
29  
30  
31  
32  
33  
34  
35  
36  
37  
38  
39  
40  
41  
42  
43  
44  
45  
46  
47  
48  
49  
50  
51  
52  
53  
54  
55  
56  
57  
58  
59  
60

Table 4. A summary of the barriers to smoking cessation – reported prevalence of each barrier by vulnerable group for studies using quantitative and mixed methods<sup>ab</sup>.

| Barrier                                 | Reported prevalence of each barrier N/Total N (%) |                                   |                                                                                                                                     |                              |                         |
|-----------------------------------------|---------------------------------------------------|-----------------------------------|-------------------------------------------------------------------------------------------------------------------------------------|------------------------------|-------------------------|
|                                         | Low SES groups (n = 1)                            | Indigenous groups (n = 1)         | People with a mental illness (n = 3)                                                                                                | Homeless groups (n = 2)      | Prisoner groups (n = 1) |
| <b>Individual and lifestyle factors</b> |                                                   |                                   |                                                                                                                                     |                              |                         |
| Stress management                       |                                                   | 63/130 (48) <sup>(79)</sup>       | 30/78 (39) <sup>(104)</sup>                                                                                                         | 82/186 (44) <sup>(107)</sup> |                         |
| Relaxation                              | 261/500 (52) <sup>(60)</sup>                      | 22/130 (17) <sup>(79)</sup>       | 13/30 (42) <sup>(100)</sup><br>7/72 (10) <sup>(88)</sup>                                                                            |                              |                         |
| Enjoyment                               |                                                   | 33/130 (25) <sup>(79)</sup>       | 34/72 (47) <sup>(88)</sup><br>21/105 (20) <sup>(90)</sup><br>30/78 (39) <sup>(104)</sup>                                            |                              |                         |
| Addiction                               | 431/500 (86) <sup>(60)</sup>                      | 51/130 (39) <sup>(79)</sup>       | 56 (53) <sup>(90)</sup><br>10/30 (33) <sup>(100)</sup>                                                                              | 93/186 (50) <sup>(107)</sup> |                         |
| Cravings                                |                                                   |                                   | 53/78 (68) <sup>(104)</sup><br>47/96 (48) <sup>(101)</sup>                                                                          |                              |                         |
| Withdrawal symptoms                     |                                                   |                                   | 85/96 (87) <sup>(101)</sup>                                                                                                         |                              |                         |
| Habit                                   | 411/500 (82) <sup>(60)</sup>                      | 95/130 (73) <sup>(79)</sup>       | 26/72 (36) <sup>(88)</sup><br>20/105 (19) <sup>(90)</sup><br>17/30 (58) <sup>(100)</sup>                                            |                              |                         |
| Perceived Mental Health Benefits        |                                                   | 6 – 30/130 (5-23) <sup>(79)</sup> | 21/105 (20) <sup>(90)</sup><br>7 – 8/72 (10-11) <sup>(88)</sup><br>41/78 (53) <sup>(104)</sup><br>41-76/96 (42-78) <sup>(101)</sup> |                              |                         |
| Concentration                           |                                                   |                                   | 27-56/96 (28-55) <sup>(101)</sup>                                                                                                   |                              |                         |
| Low levels of motivation                | 131/350 (38) <sup>(70)</sup>                      |                                   | 46/96 (47) <sup>(101)</sup>                                                                                                         |                              |                         |
| Weight gain                             | 69/350 (20) <sup>(70)</sup>                       | 6/130 (5) <sup>(79)</sup>         | 3/72 (4) <sup>(88)</sup><br>39/96 (40) <sup>(101)</sup>                                                                             | 38/186 (20) <sup>(107)</sup> |                         |
| Other substance use                     |                                                   |                                   | 3/72 (4) <sup>(88)</sup><br>2-8/78 (3-10) <sup>(104)</sup>                                                                          |                              |                         |



|                                                    |                                           |                             |                                                            |                                                              |                            |
|----------------------------------------------------|-------------------------------------------|-----------------------------|------------------------------------------------------------|--------------------------------------------------------------|----------------------------|
|                                                    |                                           |                             | 13-40/96<br>(13-41) <sup>(101)</sup>                       |                                                              |                            |
| Problems getting to sleep                          |                                           |                             | 23/96 (23)<br>(101)                                        |                                                              |                            |
| Low confidence and perceived difficulty            | 87 - 202/350<br>(25 - 58) <sup>(70)</sup> |                             | 22/78<br>(24) <sup>(104)</sup>                             |                                                              | 25/34 (74)<br>(109)        |
| <b>Social and community networks</b>               |                                           |                             |                                                            |                                                              |                            |
| High prevalence and acceptability in the community | 332/500 (66)<br>(60)                      | 5/130 (12) <sup>(79)</sup>  | 13/105 (13)<br>(90)                                        | 78/186 (42)<br>(107)                                         | 27/34 (79)<br>(109)        |
|                                                    | 116/350 (33)<br>(70)                      |                             | 5/72 (7) <sup>(88)</sup><br>34/78<br>(43) <sup>(104)</sup> |                                                              |                            |
| Lack of social support                             | 90/350 (26)<br>(70)                       |                             |                                                            | 48/186 (26)<br>(107)<br>70-79/98<br>(71-79) <sup>(106)</sup> | 10/34 (29)<br>(109)        |
| Lack of health and other professional support      |                                           |                             | 3/72 (4) <sup>(88)</sup>                                   |                                                              | 19/34 (56)<br>(109)        |
| Social activity                                    |                                           | 44/130 (34) <sup>(79)</sup> | 17/30 (58)<br>(100)<br>2/72 (3) <sup>(88)</sup>            |                                                              |                            |
| Availability of cigarettes                         |                                           | 5/130 (4) <sup>(79)</sup>   | 8/105 (8) <sup>(90)</sup><br>5/72 (7) <sup>(88)</sup>      |                                                              |                            |
| <b>Living and working conditions</b>               |                                           |                             |                                                            |                                                              |                            |
| Access to quit resources                           | 108/350<br>(31) <sup>(70)</sup>           |                             |                                                            |                                                              | 9/34 (27) <sup>(109)</sup> |
| Boredom                                            | 242/500 (48)<br>(60)                      | 38/130 (29) <sup>(79)</sup> | 9/72 (13) <sup>(88)</sup><br>13/105 (13)<br>(90)           |                                                              |                            |
| Stressful factors                                  |                                           |                             | 4/72 (6) <sup>(88)</sup>                                   |                                                              |                            |
| Living environments                                |                                           |                             |                                                            |                                                              | 20 (59) <sup>(109)</sup>   |

<sup>a</sup> Decimals rounded to nearest whole number where appropriate.

<sup>b</sup> Numerators/denominators are presented first, followed by proportion (in parentheses), followed by reference.

## DISCUSSION

This is the first systematic review reporting perceived barriers to smoking cessation across a range of vulnerable groups. The findings from 54 qualitative, eight quantitative and three mixed methods studies demonstrate that barriers to quitting smoking operate at multiple levels including individual and lifestyle factors; social and community networks; living conditions; and cultural and socioeconomic factors. These include: smoking for stress management; enjoyment of smoking; addiction to nicotine; habit; social acceptability of smoking; lack of support to quit and access to quit resources; boredom; stressful life factors; pro-smoking living environments; cultural norms and socioeconomic disadvantage. Stress management, lack of support from health professionals and other service providers and the high prevalence and acceptability of smoking in communities were the three barriers common across all six vulnerable groups included in this review. The identification of perceived barriers common across vulnerable groups is an extension of the previous literature.

The identified barriers broadly reflect those reported in two systematic reviews limited to pregnant smokers (47) and Indigenous Australian pregnant smokers (32) and two critical reviews providing summaries of the challenges to cessation amongst low income smokers (33) and low income; rural; homeless; hard core; immigrant and HIV positive smokers (48). Addiction to nicotine, habit, stress management, enjoyment and weight gain are typically reported barriers to smoking cessation within the general population (26-28, 114). No studies were found that directly compared barriers experienced by vulnerable groups and smokers in the general population. To the authors knowledge, only one study has assessed the effect of socioeconomic position on barriers to quitting smoking and identified that decreasing SEP was associated with higher likelihood of reporting stress management and boredom as barriers (28). This review did not aim to provide direct comparisons between vulnerable groups and the general population due to the heterogeneity of studies.

1  
2  
3 Additionally, comparisons by gender were beyond the scope of this review, but should be  
4 considered for further research, as socioeconomic disadvantage has differential effects on  
5 males and females (20) and preliminary evidence suggests barriers to cessation may differ by  
6 gender (28, 70).  
7  
8  
9  
10

11  
12 Nevertheless, the novel results of this review indicate that vulnerable smokers report a  
13 number of additional barriers to cessation that operate within their social and community  
14 networks; living conditions; and wider cultural and socioeconomic contexts. Social and  
15 community barriers include: lack of support to quit from both peers and health and other  
16 professionals; high prevalence and acceptability of smoking within vulnerable communities  
17 and smoking as a social activity. Living conditions include: stressful factors; pro-smoking  
18 living and working circumstances; lack of access to quit resources; social and geographical  
19 isolation and boredom. Cultural norms and socioeconomic disadvantage also presented  
20 barriers to quitting.  
21  
22  
23  
24  
25  
26  
27  
28  
29  
30  
31  
32  
33

### 34 **Main barriers identified across all vulnerable groups**

#### 35 *Stress management*

36  
37 Stress management was a frequently reported individual level barrier. Smokers  
38 typically demonstrate higher levels of stress and low mood than non-smokers and ex-smokers  
39 (115-117). Smoking may provide a coping mechanism for individuals who are prone to  
40 higher levels of stress (118-120) or smoking may act as a stressor due to neurobiological  
41 processes or through the experience of withdrawal symptoms (120). Stressors associated with  
42 vulnerable groups (for example unemployment, financial stress, and poverty) may compound  
43 stress levels within vulnerable groups. Given that vulnerable smokers may be more likely to  
44 report smoking in order to relieve stress (28) incorporating stress management techniques  
45 into interventions targeted at vulnerable groups may help to increase cessation.  
46  
47  
48  
49  
50  
51  
52  
53  
54  
55  
56  
57  
58  
59  
60

1  
2  
3 *Lack of support to quit from health professionals and other service providers*  
4

5 At the social and community level, a lack of support to quit from health professionals  
6 and other service providers was identified. This reflects research that suggests smokers from  
7 low SEP are less likely to receive advice to quit from a healthcare provider than their more  
8 higher SEP counterparts (121), despite evidence demonstrating brief advice can increase the  
9 likelihood of successful quitting (122, 123). Both organisational and individual factors affect  
10 the provision of quit advice by health and other service providers. These include lack of time,  
11 confidence, knowledge and counselling skills (124). Efforts should be focussed on improving  
12 health professionals' ability to offer quit advice and may benefit from examining how best to  
13 ensure compliance to existing guidelines that provide clear recommendations on identifying  
14 individuals who are at higher risk of smoking and addressing the unique issues that these  
15 individuals face.  
16  
17  
18  
19  
20  
21  
22  
23  
24  
25  
26  
27  
28

29 Tailoring interventions to the specific needs of vulnerable groups may be effective.  
30 Tailored interventions for behaviour change have been found to be effective compared to no  
31 intervention or dissemination of guidelines or educational materials alone [92]. Given that  
32 this review identified three common barriers across the six vulnerable groups include in this  
33 review, we argue that subsequent smoking cessation interventions in vulnerable groups  
34 should seek to address these factors. Programs should include specific modules on stress  
35 management techniques and how best to combat stress in vulnerable groups as well as  
36 educating smokers about how stress relief and relief from nicotine withdrawal symptoms can  
37 be confounded.  
38  
39  
40  
41  
42  
43  
44  
45  
46  
47  
48

49 Smoking cessation interventions should be designed to maximise participation by  
50 vulnerable groups, addressing the key barriers around acceptability and access to  
51 interventions. Utilising existing services and organisations that are highly accessed by  
52 vulnerable groups and are a trusted source of help for vulnerable groups is also necessary.  
53  
54  
55  
56  
57  
58  
59  
60

1  
2  
3 There is accumulating evidence that social and community service organisations (SCSOs) are  
4 well placed to provide brief smoking cessation advice to highly vulnerable clients (125, 126).  
5  
6

### 7 *High prevalence and acceptability of smoking*

8  
9  
10 The high prevalence and social acceptability of smoking within vulnerable  
11 communities was frequently reported. Considerable measures have been taken to address the  
12 denormalisation of smoking in the general population through regulation and legislative  
13 changes such as restrictions in advertising, smoke-free environment policies and point of sale  
14 restriction (1, 127, 128). Participants who were homeless, experiencing mental illness and  
15 prisoners cited a lack of restrictions on smoking within their living environments (or lack of  
16 enforcement of existing policies) as a factor that reinforced their smoking. While there are  
17 challenges associated with their implementation, smoke free areas can be successfully  
18 implemented within mental health treatment centres and prisons (129-131) and there is  
19 potential to extend these restrictions to homeless shelters and public housing developments.  
20  
21  
22  
23  
24  
25  
26  
27  
28  
29  
30

31  
32 Efforts to encourage the denormalisation of smoking in the environments of  
33 vulnerable communities require further exploration. Providing access to acceptable and  
34 effective behavioural and pharmacological supports should ensure that denormalisation does  
35 not result in compounding stigma and further isolating vulnerable groups (127, 132).  
36  
37  
38  
39

### 40 **Barriers specific to certain groups**

#### 41 *Indigenous groups*

42  
43  
44  
45 Indigenous groups identified unique stressors linked to smoking including racism and  
46 historical factors; cultural practices including ceremonial use of tobacco and cultural values  
47 that promote sharing, kinship and reciprocity and the importance of smoking as a way to  
48 maintain cultural identity. Cultural values also had effects on the willingness of Indigenous  
49 participants to access smoking support services. Certain Indigenous groups may be less likely  
50 to receive advice to quit or engage with services designed to aid in cessation (133). However,  
51  
52  
53  
54  
55  
56  
57  
58  
59  
60

1  
2  
3 it is important to note that smoking cessation programs have been shown to be effective  
4  
5 within Indigenous groups (113, 134). Culturally appropriate interventions tailored to the  
6  
7 needs of Indigenous smokers should continue to be developed, implemented and evaluated.  
8  
9 These programs should acknowledge the cultural significance of tobacco use and the  
10  
11 important historical and social factors associated with Indigenous groups and smoking (135).

#### 14 *Prisoners*

15  
16 Prisoners identified unique stressors within their living conditions that contributed to  
17  
18 their smoking including social isolation, anxiety regarding legal matters and transfers to other  
19  
20 prisons. A recent multicomponent randomised controlled trial that included improving stress  
21  
22 management skills in prisoners found similar point prevalence abstinence rates as another  
23  
24 trial conducted with prisoners (9) and other community based studies (136, 137). Thus,  
25  
26 smoking cessation programs can be effective even in prison environments that are highly  
27  
28 conducive to smoking and should form a part of routine care within prison systems.  
29  
30

#### 31 *People with a mental illness*

32  
33 Low motivation to quit smoking was only reported in studies involving smokers with  
34  
35 a mental illness. This contradicts research showing no difference in motivation to quit  
36  
37 between those with severe mental illness and the general population (138). A recent review  
38  
39 concluded there is some evidence to suggest that individuals diagnosed with a psychotic  
40  
41 disorder are slightly less motivated to quit than those diagnosed with depression (138).  
42  
43 Possible reasons for this include the symptoms associated with schizophrenia (including  
44  
45 amotivation), management of side effects of medications (including Parkinsonism), limited  
46  
47 support systems, low perceived vulnerability to smoking related disease, lack of alternate  
48  
49 coping mechanisms and poverty (138, 139). Information on the diagnoses of participants was  
50  
51 only reported in one of the studies reporting motivation as a barrier in this review (92) where  
52  
53 the majority of participants were diagnosed with a psychotic disorder. However, other studies  
54  
55  
56  
57  
58  
59  
60

1  
2  
3 did not provide information on participants' diagnoses and further exploration is beyond the  
4  
5 scope of this review.  
6

7  
8 Symptom management also presented a significant barrier within studies concerning  
9  
10 people with a mental illness. There is evidence to suggest that biochemical processes between  
11  
12 nicotine and other substances in tobacco improve some symptoms of mental illness (139).  
13  
14 Additionally, smokers with a mental illness may be more likely to misattribute their  
15  
16 withdrawal symptoms as recurring mental illness symptoms. Further investigation and  
17  
18 education regarding cessation and symptom management with people with a mental illness is  
19  
20 warranted. Integrating smoking cessation care with mental health and addiction treatments  
21  
22 can be effective at promoting cessation rates in groups with mental illness (21, 31). However,  
23  
24 future studies need to investigate ways to maintain long term smoking cessation as well as  
25  
26 systems-level changes that may support smoking cessation in people with mental illness (131,  
27  
28 140).  
29  
30

### 31 32 **Barriers to smoking cessation in vulnerable groups: a model**

33  
34 Figure 2 visually demonstrates the broad range of barriers to cessation reported by vulnerable  
35  
36 groups, many of which exist outside of the realm of the individual. This model demonstrates  
37  
38 the interconnectedness of individual and lifestyle factors with the wider social and  
39  
40 community factors, living conditions and cultural, socioeconomic and environmental factors.  
41  
42 The two darker spheres holding social and community networks and individual and lifestyle  
43  
44 factors identify those factors that are potentially modifiable through short term health  
45  
46 behaviour change interventions. This model does not provide an exhaustive list of all of the  
47  
48 factors that prevent vulnerable individuals from smoking cessation. It does provide a  
49  
50 framework for understanding the perceived self-reported barriers to quitting smoking  
51  
52 identified in this review.  
53  
54  
55  
56  
57  
58  
59  
60

### Strengths and limitations

This synthesis of the literature provides evidence of the perceived barriers to smoking cessation by examining the methodological quality of studies and comparing between and within selected vulnerable groups. However, this review has some limitations. While the overall quality of the studies included in this review was acceptable, most qualitative studies failed to provide information regarding the trustworthiness of the research and most quantitative studies failed to provide information on the validity and reliability of the [survey measures used to assess barriers. Strategies for enhancing the trustworthiness of qualitative research have been concisely summarised \(141\) and future qualitative studies should seek to employ these strategies where possible. Future quantitative studies should seek to report at least brief psychometric properties of survey measures used to assess barrier to smoking cessation, including reliability and validity.](#)

Of quantitative studies included, the majority used convenience samples. It is not generally feasible to target vulnerable and hard to reach populations using random population sampling procedures. This limits the generalizability and transferability of the included studies to wider vulnerable populations. Nevertheless, the agreement in findings between qualitative studies does suggest that these results are robust.

The nature of the studies included in this review means that no weight is given to the different barriers and the authors cannot provide comment on which, if any, barriers should be made a priority to target in smoking cessation interventions with vulnerable groups. Given limited resources and funds, addressing all barriers is rarely possible. Future research is needed to identify those barriers which are most important to address first and to prioritise resourcing and intervention development.

The results of this review were broadly categorised according to the SDHF, however these categories are not mutually exclusive and certain barriers were able to be included in



1  
2  
3 multiple categories (for example stress and stressful factors could be categorised as either  
4 individual level barriers or barriers within the living conditions level). The reviewed studies  
5 do not directly clarify whether the nature of stress experienced in vulnerable groups is  
6 personal or contextual. Constructs such as coping and resilience (140, 142) have been  
7 hypothesised as mediators between stress and smoking in low socioeconomic groups (143).  
8  
9  
10  
11  
12  
13

14 Similarly, as this review sought to provide a summary of vulnerable smokers'  
15 perceived self-reported barriers to cessation, other barriers which may be important  
16 determinants of quit attempts and success were not considered. Barriers such as the  
17 knowledge and attitudes of staff and health professionals and the capacity of services to offer  
18 smoking cessation programs, which have been identified within the literature (124), should  
19 also be considered when examining the challenges facing vulnerable groups.  
20  
21  
22  
23  
24  
25  
26

27 This review was only able to identify four studies that examined the barriers to  
28 quitting smoking within prisoner (n=2 studies) and homeless (n=2) groups and one study  
29 focussing on at-risk youth. These results indicate more research is required with these groups  
30 to examine the barriers to smoking cessation. More studies investigating the barriers to  
31 cessation within these groups may lead to identification of additional common and unique  
32 barriers across vulnerable groups. Additionally, this review was limited to studies conducted  
33 within one of six vulnerable groups. Other groups that show high rates of smoking include  
34 lesbian, gay, bisexual and transgender groups (144); culturally and linguistically diverse  
35 groups (145); and rural and remote communities (146). The authors acknowledge the  
36 disparity in smoking prevalence in these groups, however their inclusion would have  
37 increased the breadth of the review to a level that would be too broad and complex to be  
38 useful. These groups may experience barriers to cessation different to those experienced by  
39 the groups included in this review. It should also be noted that individuals within the included  
40 groups often experience multiple forms of disadvantage for example people who are  
41  
42  
43  
44  
45  
46  
47  
48  
49  
50  
51  
52  
53  
54  
55  
56  
57  
58  
59  
60

1  
2  
3 homeless are more likely to experience a mental illness (147) and Indigenous communities  
4  
5 are more likely to be overrepresented in lower socioeconomic positions (3).  
6

## 7 **Conclusions**

8  
9  
10 These results support findings that vulnerable groups experience common barriers to  
11  
12 smoking cessation, and also barriers which are unique to specific vulnerable groups. Stress  
13  
14 management, high prevalence and acceptability of smoking and lack of support to quit were  
15  
16 identified as priority areas for cessation research, program implementation and policy change.  
17  
18 Many of the barriers identified within this review are modifiable through short term health  
19  
20 behaviour change strategies. For heterogeneous groups of vulnerable individuals, intervention  
21  
22 development should seek to address those barriers common to all vulnerable groups identified  
23  
24 in this review. For relatively homogenous groups of vulnerable individuals, interventions  
25  
26 should seek to address the unique barriers faced by those groups in addition to those barriers  
27  
28 identified as common to all vulnerable groups.  
29  
30

31  
32 These findings, coupled with lower success rates in quitting within vulnerable groups  
33  
34 relative to the success rates in more advantaged groups (14, 148), suggest that interventions  
35  
36 with vulnerable groups need to address wider social, community and cultural factors as well  
37  
38 as individualised cessation support. Addressing the predictors of cessation found within the  
39  
40 general population such as nicotine dependence and enjoyment remain important for  
41  
42 vulnerable groups.  
43  
44  
45  
46

## 47 **Acknowledgements:**

48  
49 We are grateful to Research Assistant (RA) Ms Madeleine Randell and to Dr Michelle  
50  
51 Anderson for providing valuable comment on draft manuscripts.  
52  
53

54 **Contributorship statement:** All authors conceived the initial scope and subject of the  
55  
56 review. LT carried out all searches, wrote up drafts and performed quality assessment. BB,  
57  
58  
59  
60

1  
2  
3 CP and JB provided extensive feedback and contributions to drafts of the paper. All authors  
4  
5 completed quality assessment of the included papers. BB and LT completed narrative  
6  
7 synthesis. All authors have read and met the ICMJE criteria for authorship.  
8

9  
10 **Competing interests:** All authors have completed the Unified Competing Interest Form at  
11  
12 [www.icmje.org/coi\\_disclosure.pdf](http://www.icmje.org/coi_disclosure.pdf) (available on request from the corresponding author) and declare  
13  
14 that: no support from any organisation for the submitted work; no financial relationships with any  
15  
16 organisations that might have an interest in the submitted work in the previous three years; no other  
17  
18 relationships or activities that could appear to have influenced the submitted work.  
19

20 **Funding:** BB is supported by a Cancer Institute NSW Career Development Fellowship and a  
21  
22 University of Newcastle Faculty of Health and Medicine Gladys M Brawn Career Development  
23  
24 Fellowship. JB is supported by an Australian Research Council Post-Doctoral Industry Fellowship.  
25  
26 CP is supported by Newcastle Cancer Control Collaborative funding. LT is supported by a 50:50  
27  
28 scholarship from the University of Newcastle Faculty of Health and Medicine and the Cancer Institute  
29  
30 NSW.  
31

32 **Data sharing:** There are no additional data available.  
33  
34  
35  
36  
37  
38  
39  
40  
41  
42  
43  
44  
45  
46  
47  
48  
49  
50  
51  
52  
53  
54  
55  
56  
57  
58  
59  
60

## REFERENCES

1. World Health Organization (WHO). WHO report on the Global Tobacco Epidemic. Geneva: 2008.
2. Australian Institute of Health and Welfare (AIHW). 2010 National Drug Strategy Household Survey: Detailed findings. Canberra: 2010 Contract No.: Cat. no. PHE145.
3. Australian Institute of Health and Welfare. The health and welfare of Australia's Aboriginal and Torres Strait Islander people, an overview 2011. Canberra: 2011 Contract No.: Cat. no. IHW 42.
4. Centers for Disease Control Prevention (CDCP). Current cigarette smoking among adults - United States, 2011. *MMWR Morb Mortal Wkly Rep.* 2012;61(44):889-94. Epub 2012/11/09.
5. Statistics Canada. Canadian Community Health Survey 2000/01 Ottawa: Statistics Canada, 2001.
6. Lawrence D, Mitrou F, Zubrick SR. Smoking and mental illness: results from population surveys in Australia and the United States. *BMC Public Health.* 2009;9:285. Epub 2009/08/12.
7. Kelly P, Baker, AL., Deane, FP., Kay-Lambkin, FJ., Bonevski, B., Tregarthen, J. . Prevalence of smoking and other health risk factors in people attending residential substance abuse treatment. *Drug Alcohol Rev.* 2012;31(5):638-44. doi: 10.1111/j.465-3362.2012.00465.x. Epub 2012 May 30.
8. Baggett TP, Rigotti NA. Cigarette smoking and advice to quit in a national sample of homeless adults. *Am J Prev Med.* 2010;39(2):164-72. Epub 2010/07/14.
9. Cropsey K, Eldridge G, Weaver M, Villalobos G, Stitzer M, Best A. Smoking cessation intervention for female prisoners: addressing an urgent public health need. *Am J Public Health.* 2008;98(10):1894-901. Epub 2008/08/16.
10. Indig D, Topp L, Ross B, Mamoon H, Border B, Kumar S, et al. 2009 NSW Inmate Health Survey: Key Findings Report Sydney: Justice Health, 2010.
11. Wiebel WW. Identifying and gaining access to hidden populations. *NIDA Res Monogr.* 1990;98:4-11. Epub 1990/01/01.
12. McLachlan R, Gilfillan G, Gordon J. Deep and Persistent Disadvantage in Australia. Canberra: 2013.
13. Hyland A, Borland R, Li Q, Yong HH, McNeill A, Fong GT, et al. Individual-level predictors of cessation behaviours among participants in the International Tobacco Control (ITC) Four Country Survey. *Tob Control.* 2006;15 Suppl 3:iii83-94. Epub 2006/06/07.
14. Kotz D, West R. Explaining the social gradient in smoking cessation: it's not in the trying, but in the succeeding. *Tob Control.* 2009;18(1):43-6.
15. Gilman SE, Martin LT, Abrams DB, Kawachi I, Kubzansky L, Loucks EB, et al. Educational attainment and cigarette smoking: a causal association? *Int J Epidemiol.* 2008;37(3):615-24. Epub 2008/01/09.
16. Hatzianandreu EJ, Pierce JP, Lefkopoulou M, Fiore MC, Mills SL, Novotny TE, et al. Quitting smoking in the United States in 1986. *J Natl Cancer Inst.* 1990;82(17):1402-6. Epub 1990/09/05.
17. Levy DT, Romano E, Mumford E. The relationship of smoking cessation to sociodemographic characteristics, smoking intensity, and tobacco control policies. *Nicotine Tob Res.* 2005;7(3):387-96. Epub 2005/08/09.
18. Reid JL, Hammond D, Boudreau C, Fong GT, Siahpush M, Collaboration ITC. Socioeconomic disparities in quit intentions, quit attempts, and smoking abstinence among smokers in four western countries: findings from the International Tobacco Control Four Country Survey. *Nicotine Tob Res.* 2010;12 Suppl:S20-33. Epub 2010/10/15.
19. Giskes K, van Lenthe FJ, Turrell G, Brug J, Mackenbach JP. Smokers living in deprived areas are less likely to quit: a longitudinal follow-up. *Tob Control.* 2006;15(6):485-8. Epub 2006/11/30.
20. Graham H, Inskip HM, Francis B, Harman J. Pathways of disadvantage and smoking careers: evidence and policy implications. *J Epidemiol Community Health.* 2006;60 Suppl 2:7-12. Epub 2007/08/22.
21. Hiscock R, Bauld L, Amos A, Fidler JA, Munafo M. Socioeconomic status and smoking: a review. *Ann N Y Acad Sci.* 2012;1248:107-23. Epub 2011/11/19.

- 1
- 2
- 3 22. Melnyk KA. Barriers: a critical review of recent literature. *Nurs Res*. 1988;37(4):196-201.
- 4 Epub 1988/07/01.
- 5 23. Dahlgren G, & Whitehead, M. . Policies and strategies to promote equity in health.
- 6 Copenhagen: 1992.
- 7 24. Marmot M. Social determinants of health inequalities. *Lancet*. 2005;365(9464):1099-104.
- 8 Epub 2005/03/23.
- 9 25. Theobald W, Smith, SS., Fiore, M. . Insights: Smoking in Wisconsin. University of Wisconsin
- 10 Medical School: UW Center for Tobacco Research and Intervention, 2002.
- 11 26. Guirguis AB, Ray SM, Zingone MM, Airee A, Franks AS, Keenum AJ. Smoking cessation:
- 12 barriers to success and readiness to change. *Tenn Med*. 2010;103(9):45-9. Epub 2010/12/09.
- 13 27. Orleans CT, Jepson C, Resch N, Rimer BK. Quitting motives and barriers among older
- 14 smokers. The 1986 Adult Use of Tobacco Survey revisited. *Cancer*. 1994;74(7 Suppl):2055-61. Epub
- 15 1994/10/01.
- 16 28. Fidler JA, West R. Self-perceived smoking motives and their correlates in a general
- 17 population sample. *Nicotine Tob Res*. 2009;11(10):1182-8. Epub 2009/07/31.
- 18 29. Poland B, Frohlich K, Haines RJ, Mykhalovskiy E, Rock M, Sparks R. The social context of
- 19 smoking: the next frontier in tobacco control? *Tob Control*. 2006;15(1):59-63. Epub 2006/01/27.
- 20 30. Paul CL, Ross S, Bryant J, Hill W, Bonevski B, Keevy N. The social context of smoking: A
- 21 qualitative study comparing smokers of high versus low socioeconomic position. *BMC Public Health*.
- 22 2010;10:211. Epub 2010/04/28.
- 23 31. Rodriguez D, Carlos HA, Adachi-Mejia AM, Berke EM, Sargent JD. Predictors of tobacco
- 24 outlet density nationwide: a geographic analysis. *Tob Control*. 2013;22(5):349-55. Epub 2012/04/12.
- 25 32. Gould GS, Munn J, Watters T, McEwen A, Clough AR. Knowledge and views about maternal
- 26 tobacco smoking and barriers for cessation in Aboriginal and Torres Strait Islanders: A systematic
- 27 review and meta-ethnography. *Nicotine Tob Res*. 2013;15(5):863-74. Epub 2012/10/09.
- 28 33. Gollust SE, Schroeder SA, Warner KE. Helping smokers quit: understanding the barriers to
- 29 utilization of smoking cessation services. *Milbank Q*. 2008;86(4):601-27. Epub 2009/01/06.
- 30 34. Australian National Preventive Health Agency. A priority-driven research agenda for tobacco
- 31 control in Australia. 2013.
- 32 35. World Health Organisation. Report on the global tobacco epidemic, 2013. 2013.
- 33 36. U.S. Department of Health and Human Services. Ending the tobacco Epidemic: A tobacco
- 34 control strategic action plan for the U.S. Department of Health and Human Services. In: Office of the
- 35 Assistant Secretary for Health, editor. Washington, DC. November, 2010. .
- 36 37. Moher D, Liberati A, Tetzlaff J, Altman DG, Group P. Preferred reporting items for systematic
- 37 reviews and meta-analyses: the PRISMA statement. *PLoS Med*. 2009;6(7):e1000097. Epub
- 38 2009/07/22.
- 39 38. Tong A, Flemming K, McInnes E, Oliver S, Craig J. Enhancing transparency in reporting the
- 40 synthesis of qualitative research: ENTREQ. *BMC Med Res Methodol*. 2012;12:181. Epub 2012/11/29.
- 41 39. Carson KV, Brinn MP, Peters M, Veale A, Esterman AJ, Smith BJ. Interventions for smoking
- 42 cessation in Indigenous populations. *Cochrane Database Syst Rev*. 2012;1:CD009046. Epub
- 43 2012/01/20.
- 44 40. Cunningham C, Stanley F. Indigenous by definition, experience, or world view. *BMJ*.
- 45 2003;327(7412):403-4. Epub 2003/08/23.
- 46 41. Letts L, Wilkins S, Stewart D, Bosch J, Westmorland M. Critical Review Form - Qualitative
- 47 Studies (Version 2.0). McMaster University; 2007; Available from:
- 48 <http://www.fhs.mcmaster.ca/rehab/ebp/>.
- 49 42. Barley EA, Murray J, Walters P, Tylee A. Managing depression in primary care: A meta-
- 50 synthesis of qualitative and quantitative research from the UK to identify barriers and facilitators.
- 51 *BMC Fam Pract*. 2011;12:47. Epub 2011/06/11.
- 52 43. O'Cathain A, Murphy E, Nicholl J. The quality of mixed methods studies in health services
- 53 research. *J Health Serv Res Policy*. 2008;13(2):92-8. Epub 2008/04/18.
- 54
- 55
- 56
- 57
- 58
- 59
- 60

- 1
- 2
- 3 44. Popay J, Roberts H, Sowden A, Petticrew M, Arai L, Rodgers M, et al. Guidance on the
- 4 Conduct of Narrative Synthesis in Systematic Reviews. 2006.
- 5 45. Rumrill Jr PD, Fitzgerald SM. Using narrative literature reviews to build a scientific knowledge
- 6 base. *Work*. 2001;16(2):165-70. Epub 2002/11/21.
- 7 46. Denyer D, & Tranfield, D. Using qualitative research synthesis to build an actionable
- 8 knowledge base. *Manage Decis*. 2006;44(2):213-27.
- 9 47. Ingall G, Cropley M. Exploring the barriers of quitting smoking during pregnancy: a
- 10 systematic review of qualitative studies. *Women Birth*. 2010;23(2):45-52. Epub 2009/11/03.
- 11 48. Browning K, Baker, CJ., McNally, GA., Wewers, ME. . Nursing research in tobacco use and
- 12 special populations. *Annu Rev Nurs Res*. 2009;27:319-42.
- 13 49. Ahijevych K, Kuun P, Christman S, Wood T, Browning K, Wewers ME. Beliefs about tobacco
- 14 among Appalachian current and former users. *Appl Nurs Res*. 2003;16(2):93-102. Epub 2003/05/24.
- 15 50. Bancroft A, Wiltshire S, Parry O, Amos A. "It's like an addiction first thing...afterwards it's like
- 16 a habit": daily smoking behaviour among people living in areas of deprivation. *Soc Sci Med*.
- 17 2003;56(6):1261-7. Epub 2003/02/26.
- 18 51. Beech BM, Scarinci IC. Smoking attitudes and practices among low-income African-
- 19 Americans: qualitative assessment of contributing factors. *Am J Health Promot*. 2003;17(4):240-8.
- 20 Epub 2003/03/19.
- 21 52. Bryant J, Bonevski B, Paul C, O'Brien J, Oakes W. Developing cessation interventions for the
- 22 social and community service setting: a qualitative study of barriers to quitting among
- 23 disadvantaged Australian smokers. *BMC Public Health*. 2011;11:493. Epub 2011/06/28.
- 24 53. Copeland L. An exploration of the problems faced by young women living in disadvantaged
- 25 circumstances if they want to give up smoking: can more be done at general practice level? *Fam*
- 26 *Pract*. 2003;20(4):393-400. Epub 2003/07/24.
- 27 54. Dunn CL, Pirie PL, Lando HA. Attitudes and perceptions related to smoking among pregnant
- 28 and postpartum women in a low-income, multiethnic setting. *Am J Health Promot*. 1998;12(4):267-
- 29 74. Epub 1998/02/06.
- 30 55. Franco L, Welsby D, Eccleston P, Furber S. A qualitative study about smoking cessation with
- 31 clients of community service organisations that work with disadvantaged families. *Health Promot J*
- 32 *Austr*. 2011;22(2):153-5. Epub 2011/08/09.
- 33 56. Lacey LP, Manfredi C, Balch G, Warnecke RB, Allen K, Edwards C. Social support in smoking
- 34 cessation among black women in Chicago public housing. *Public Health Rep*. 1993;108(3):387-94.
- 35 57. Moffatt J, Whip R, Moffatt J. The Struggle to Quit: Barriers and Incentives to Smoking
- 36 Cessation. *Health Educ J*. 2004;63(2):101-12.
- 37 58. Nichter M, Nichter M, Muramoto M, Adrian S, Goldade K, Tesler L, et al. Smoking among
- 38 low-income pregnant women: an ethnographic analysis. *Health Educ Behav*. 2007;34(5):748-64.
- 39 Epub 2007/01/04.
- 40 59. Peretti-Watel P, Constance J. "It's all we got left". Why poor smokers are less sensitive to
- 41 cigarette price increases. *Int J Environ Res Public Health*. 2009;6(2):608-21. Epub 2009/05/15.
- 42 60. Price JH, Everett SA. Perceptions of lung cancer and smoking in an economically
- 43 disadvantaged population. *J Community Health*. 1994;19(5):361-75. Epub 1994/10/01.
- 44 61. Roddy E, Antoniak M, Britton J, Molyneux A, Lewis S. Barriers and motivators to gaining
- 45 access to smoking cessation services amongst deprived smokers--a qualitative study. *BMC Health*
- 46 *Serv Res*. 2006;6:147. Epub 2006/11/08.
- 47 62. Stead M, MacAskill S, MacKintosh AM, Reece J, Eadie D. "It's as if you're locked in":
- 48 qualitative explanations for area effects on smoking in disadvantaged communities. *Health Place*.
- 49 2001;7(4):333-43. Epub 2001/10/30.
- 50 63. Stewart MJ, Brosky G, Gillis A, Jackson S, Johnston G, Kirkland S, et al. Disadvantaged women
- 51 and smoking. *Can J Public Health*. 1996;87(4):257-60.
- 52 64. Stewart MJ, Gillis A, Brosky G, Johnston G, Kirkland S, Leigh G, et al. Smoking among
- 53 disadvantaged women: causes and cessation. *Can J Nurs Res*. 1996;28(1):41-60.
- 54
- 55
- 56
- 57
- 58
- 59
- 60

- 1  
2  
3 65. Stewart MJ, Greaves L, Kushner KE, Letourneau NL, Spitzer DL, Boscoe M. Where there is  
4 smoke, there is stress: low-income women identify support needs and preferences for smoking  
5 reduction. *Health Care Women Int.* 2011;32(5):359-83. Epub 2011/04/09.
- 6 66. Stillman FA, Bone L, Avila-Tang E, Smith K, Yancey N, Street C, et al. Barriers to smoking  
7 cessation in inner-city African American young adults. *Am J Public Health.* 2007;97(8):1405-8. Epub  
8 2007/06/30.
- 9 67. Tod AM. Barriers to smoking cessation in pregnancy: a qualitative study. *Br J Community  
10 Nurs.* 2003;8(2):56-64. Epub 2003/02/18.
- 11 68. Tsourtos G, Ward, PR., Muller, R. . Smoking and stress: the double edged sword of living in a  
12 disadvantaged area. *Australasian Medical Journal.* 2008;1(1).
- 13 69. Wiltshire S, Bancroft A, Parry O, Amos A. 'I came back here and started smoking again':  
14 perceptions and experiences of quitting among disadvantaged smokers. *Health Educ Res.*  
15 2003;18(3):292-303. Epub 2003/06/28.
- 16 70. Rosenthal L, Carroll-Scott A, Earnshaw VA, Sackey N, O'Malley SS, Santilli A, et al. Targeting  
17 cessation: understanding barriers and motivations to quitting among urban adult daily tobacco  
18 smokers. *Addict Behav.* 2013;38(3):1639-42. Epub 2012/12/21.
- 19 71. White S, Baird W. Disadvantaged former miners' perspectives on smoking cessation: A  
20 qualitative study. *Health Educ J.* 2013;72(6):755-60.
- 21 72. Burgess D, Fu SS, Joseph AM, Hatsukami DK, Solomon J, van Ryn M. Beliefs and experiences  
22 regarding smoking cessation among American Indians. *Nicotine Tob Res.* 2007;9 Suppl 1:S19-28.  
23 Epub 2007/03/17.
- 24 73. Choi WS, Daley CM, James A, Thomas J, Schupbach R, Segraves M, et al. Beliefs and attitudes  
25 regarding smoking cessation among American Indians: a pilot study. *Ethn Dis.* 2006;16(1):35-40.  
26 Epub 2006/04/08.
- 27 74. Dawson AP, Cargo M, Stewart H, Chong A, Daniel M. Aboriginal health workers experience  
28 multilevel barriers to quitting smoking: a qualitative study. *Int J Equity Health.* 2012;11:27. Epub  
29 2012/05/25.
- 30 75. Dawson AP, Cargo M, Stewart H, Chong A, Daniel M. "I know it's bad for me and yet I do it":  
31 exploring the factors that perpetuate smoking in Aboriginal Health Workers--a qualitative study.  
32 *BMC Health Serv Res.* 2012;12:102. Epub 2012/04/27.
- 33 76. Dennis MK, Momper SL. "It's bad around here now": tobacco, alcohol and other drug use  
34 among American Indians living on a rural reservation. *J Ethn Subst Abuse.* 2012;11(2):130-48. Epub  
35 2012/06/12.
- 36 77. Fernandez C, Wilson D. Maori women's views on smoking cessation initiatives. *Nurs Prax N Z.*  
37 2008;24(2):27-40. Epub 2008/09/25.
- 38 78. Fu SS, Burgess D, van Ryn M, Hatsukami DK, Solomon J, Joseph AM. Views on smoking  
39 cessation methods in ethnic minority communities: a qualitative investigation. *Prev Med.*  
40 2007;44(3):235-40. Epub 2006/12/19.
- 41 79. Glover M. Analysing smoking using Te Whare Tapa Wha. *NZ J Psychol.* 2005;34(1):13-9.
- 42 80. Gould GS, Munn J, Avuri S, Hoff S, Cadet-James Y, McEwen A, et al. "Nobody smokes in the  
43 house if there's a new baby in it": Aboriginal perspectives on tobacco smoking in pregnancy and in  
44 the household in regional NSW Australia. *Women Birth.* 2013;26(4):246-53.
- 45 81. Gryczynski J, Feldman R, Carter-Pokras O, Kanamori M, Chen L, Roth S. Contexts of tobacco  
46 use and perspectives on smoking cessation among a sample of urban American Indians. *J Health  
47 Care Poor Underserved.* 2010;21(2):544-58. Epub 2010/05/11.
- 48 82. Hodge FS, Struthers R. Persistent smoking among Northern Plains Indians: lenient attitudes,  
49 low harm value, and partiality toward cigarette smoking. *J Cult Divers.* 2006;13(4):181-5. Epub  
50 2007/03/07.
- 51 83. Johnston V, Thomas DP. Smoking behaviours in a remote Australian Indigenous community:  
52 the influence of family and other factors. *Soc Sci Med.* 2008;67(11):1708-16. Epub 2008/10/22.
- 53  
54  
55  
56  
57  
58  
59  
60

- 1  
2  
3 84. Kaholokula J, L. BK, Santos JI, Chang HK. Culturally informed smoking cessation strategies for  
4 Native Hawaiians. *Nicotine Tob Res.* 2008;10(4):671-81. Epub 2009/03/21.
- 5 85. Passey ME, Gale JT, Sanson-Fisher RW. "It's almost expected": rural Australian Aboriginal  
6 women's reflections on smoking initiation and maintenance: a qualitative study. *BMC Womens*  
7 *Health.* 2011;11:55. Epub 2011/12/14.
- 8 86. Patten CA, Enoch C, Renner CC, Offord KP, Nevak C, Kelley SF, et al. Focus groups of Alaska  
9 Native adolescent tobacco users: preferences for tobacco cessation interventions and barriers to  
10 participation. *Health Educ Behav.* 2009;36(4):711-23. Epub 2007/12/01.
- 11 87. Wood L, France K, Hunt K, Eades S, Slack-Smith L. Indigenous women and smoking during  
12 pregnancy: knowledge, cultural contexts and barriers to cessation. *Soc Sci Med.* 2008;66(11):2378-  
13 89. Epub 2008/03/04.
- 14 88. Carosella AM, Ossip-Klein DJ, Owens CA. Smoking attitudes, beliefs, and readiness to change  
15 among acute and long term care inpatients with psychiatric diagnoses. *Addict Behav.*  
16 1999;24(3):331-44. Epub 1999/07/10.
- 17 89. Davis K, Brunette M, Vorhies V, Ferron J, Whitley R. A qualitative study of how individuals  
18 with severe mental illness assess smoking risks. *Mental Health and Substance Use.* 2010;3(2):110-23.
- 19 90. Goldberg JO, Moll S, Washington A. Exploring the Challenge of Tobacco Use and  
20 Schizophrenia. *Psychiatric Rehabilitation Skills.* 1996;1(2):55-67.
- 21 91. Howard LM, Bekele D, Rowe M, Demilew J, Bewley S, Marteau TM. Smoking cessation in  
22 pregnant women with mental disorders: a cohort and nested qualitative study. *BJOG.*  
23 2013;120(3):362-70. Epub 2012/11/22.
- 24 92. Kerr S, Woods C, Knussen C, Watson H, Hunter R. Breaking the habit: a qualitative  
25 exploration of barriers and facilitators to smoking cessation in people with enduring mental health  
26 problems. *BMC Public Health.* 2013;13:221. Epub 2013/03/19.
- 27 93. Lawn SJ, Pols RG, Barber JG. Smoking and quitting: a qualitative study with community-living  
28 psychiatric clients. *Soc Sci Med.* 2002;54(1):93-104. Epub 2002/02/01.
- 29 94. Lucksted A, Dixon LB, Sembly JB. A focus group pilot study of tobacco smoking among  
30 psychosocial rehabilitation clients. *Psychiatr Serv.* 2000;51(12):1544-8. Epub 2000/11/30.
- 31 95. Morris CD, Waxmonsky JA, May MG, Giese AA. What do persons with mental illnesses need  
32 to quit smoking? Mental health consumer and provider perspectives. *Psychiatr Rehabil J.*  
33 2009;32(4):276-84. Epub 2009/04/07.
- 34 96. Nawaz S, Frounfelker R, Ferron JC, Carpenter-Song EA, Davis K, Brunette MF. Smoking and  
35 Quitting Beliefs, Attitudes, and Behaviors Among Smokers With Severe Mental Illness From Three  
36 Race/Ethnicity Groups. *Journal of Dual Diagnosis.* 2012;8(3):180-7.
- 37 97. Snyder M, McDevitt J, Painter S. Smoking cessation and serious mental illness. *Arch Psychiatr*  
38 *Nurs.* 2008;22(5):297-304. Epub 2008/09/24.
- 39 98. Solway ES. The lived experiences of tobacco use, dependence, and cessation: insights and  
40 perspectives of people with mental illness. *Health Soc Work.* 2011;36(1):19-32. Epub 2011/03/31.
- 41 99. Tsourtos G, Ward PR, Muller R, Lawn S, Winefield AH, Hersh D, et al. The importance of  
42 resilience and stress to maintaining smoking abstinence and cessation: a qualitative study in  
43 Australia with people diagnosed with depression. *Health Soc Care Community.* 2011;19(3):299-306.  
44 Epub 2010/12/09.
- 45 100. Van Dongen CJ. Smoking and persistent mental illness: an exploratory study. *J Psychosoc*  
46 *Nurs Ment Health Serv.* 1999;37(11):26-34. Epub 1999/11/26.
- 47 101. Asher MK, Martin RA, Rohsenow DJ, MacKinnon SV, Traficante R, Monti PM. Perceived  
48 barriers to quitting smoking among alcohol dependent patients in treatment. *J Subst Abuse Treat.*  
49 2003;24(2):169-74. Epub 2003/05/15.
- 50 102. Clancy N, Zwar N, Richmond R. Depression, smoking and smoking cessation: A qualitative  
51 study. *Fam Pract.* 2013;30(5):587-92.
- 52  
53  
54  
55  
56  
57  
58  
59  
60



- 1  
2  
3 103. Prochaska JJ, Fromont SC, Wa C, Matlow R, Ramo DE, Hall SM. Tobacco use and its  
4 treatment among young people in mental health settings: A qualitative analysis. *Nicotine Tob Res.*  
5 2013;15(8):1427-35.  
6 104. Orleans CT, Hutchinson D. Tailoring nicotine addiction treatments for chemical dependency  
7 patients. *J Subst Abuse Treat.* 1993;10(2):197-208. Epub 1993/03/01.  
8 105. Ratschen E, Britton J, Doody G, McNeill A. Smoking attitudes, behaviour and nicotine  
9 dependence among mental health acute inpatients: an exploratory study. *Int J Soc Psychiatry.*  
10 2010;56(2):107-18. Epub 2010/03/09.  
11 106. Arnsten JH, Reid K, Bierer M, Rigotti N. Smoking behavior and interest in quitting among  
12 homeless smokers. *Addict Behav.* 2004;29(6):1155-61. Epub 2004/07/09.  
13 107. Connor SE, Cook RL, Herbert MI, Neal SM, Williams JT. Smoking cessation in a homeless  
14 population: there is a will, but is there a way? *J Gen Intern Med.* 2002;17(5):369-72. Epub  
15 2002/06/06.  
16 108. Okuyemi KS, Caldwell AR, Thomas JL, Born W, Richter KP, Nollen N, et al. Homelessness and  
17 smoking cessation: insights from focus groups. *Nicotine Tob Res.* 2006;8(2):287-96. Epub  
18 2006/06/13.  
19 109. Dickens GL S, JH, Haw, CM. . Smoking in a forensic psychiatric service: a survey of inpatients'  
20 views. *J Psychiatr Ment Health Nurs.* 2005;12(6):672-8; quiz 8.  
21 110. Richmond R, Butler T, Wilhelm K, Wodak A, Cunningham M, Anderson I. Tobacco in prisons:  
22 a focus group study. *Tob Control.* 2009;18(3):176-82. Epub 2009/02/04.  
23 111. Lewis S, Russell A. Young smokers' narratives: public health, disadvantage and structural  
24 violence. *Sociol Health Illn.* 2013;35(5):746-60.  
25 112. Garner L, Ratschen E. Tobacco smoking, associated risk behaviours, and experience with  
26 quitting: a qualitative study with homeless smokers addicted to drugs and alcohol. *BMC Public*  
27 *Health.* 2013;13:951. Epub 2013/10/12.  
28 113. Patten CA. Tobacco cessation intervention during pregnancy among Alaska Native women. *J*  
29 *Cancer Educ.* 2012;27 Suppl 1:S86-90. Epub 2012/02/09.  
30 114. Bott MJ, Cobb AK, Scheibmeir MS, O'Connell KA. Quitting: Smokers Relate their Experiences.  
31 *Qual Health Res.* 1997;7(2):255-69.  
32 115. File SE, Dinnis AK, Heard JE, Irvine EE. Mood differences between male and female light  
33 smokers and nonsmokers. *Pharmacol Biochem Behav.* 2002;72(3):681-9. Epub 2002/08/15.  
34 116. Hajek P, Taylor T, McRobbie H. The effect of stopping smoking on perceived stress levels.  
35 *Addiction.* 2010;105(8):1466-71. Epub 2010/06/10.  
36 117. Mulder I, Tjhuis M, Smit HA, Kromhout D. Smoking cessation and quality of life: the effect of  
37 amount of smoking and time since quitting. *Prev Med.* 2001;33(6):653-60. Epub 2001/11/22.  
38 118. Carmody TP. Affect regulation, nicotine addiction, and smoking cessation. *J Psychoactive*  
39 *Drugs.* 1992;24(2):111-22. Epub 1992/04/01.  
40 119. DiFranza JR, Wellman RJ. A sensitization-homeostasis model of nicotine craving, withdrawal,  
41 and tolerance: integrating the clinical and basic science literature. *Nicotine Tob Res.* 2005;7(1):9-26.  
42 Epub 2005/04/05.  
43 120. Parrott AC. Does cigarette smoking cause stress? *Am Psychol.* 1999;54(10):817-20. Epub  
44 1999/11/30.  
45 121. Browning KK, Ferketich AK, Salsberry PJ, Wewers ME. Socioeconomic disparity in provider-  
46 delivered assistance to quit smoking. *Nicotine Tob Res.* 2008;10(1):55-61. Epub 2008/01/12.  
47 122. Aveyard P, Begh R, Parsons A, West R. Brief opportunistic smoking cessation interventions: a  
48 systematic review and meta-analysis to compare advice to quit and offer of assistance. *Addiction.*  
49 2012;107(6):1066-73. Epub 2011/12/20.  
50 123. Stead LF, Buitrago D, Preciado N, Sanchez G, Hartmann-Boyce J, Lancaster T. Physician  
51 advice for smoking cessation. *Cochrane Database Syst Rev.* 2013;5:CD000165. Epub 2013/06/04.  
52  
53  
54  
55  
56  
57  
58  
59  
60

- 1  
2  
3 124. Stead M, Angus K, Holme I, Cohen D, Tait G, Team PER. Factors influencing European GPs'  
4 engagement in smoking cessation: a multi-country literature review. *Br J Gen Pract*.  
5 2009;59(566):682-90. Epub 2009/08/14.
- 6 125. Bryant J, Bonevski B, Paul C, Hull P, O'Brien J. Implementing a smoking cessation program in  
7 social and community service organisations: a feasibility and acceptability trial. *Drug Alcohol Rev*.  
8 2012;31(5):678-84. Epub 2011/12/08.
- 9 126. Christiansen BA, Brooks M, Keller PA, Theobald WE, Fiore MC. Closing tobacco-related  
10 disparities: Using community organizations to increase consumer demand. *Am J Prev Med*.  
11 2010;38(3 Suppl):S397-402. Epub 2010/03/05.
- 12 127. Bell K, Salmon A, Bowers M, Bell J, McCullough L. Smoking, stigma and tobacco  
13 'denormalization': Further reflections on the use of stigma as a public health tool. A commentary on  
14 *Social Science & Medicine's Stigma, Prejudice, Discrimination and Health Special Issue (67: 3)*. *Soc Sci*  
15 *Med*. 2010;70(6):795-9; discussion 800-1. Epub 2010/01/02.
- 16 128. Lavack L. Denormalization of tobacco in Canada. *Social Marketing Quarterly*. 1999;5(3):82-5.
- 17 129. El-Guebaly N, Cathcart J, Currie S, Brown D, Gloster S. Public health and therapeutic aspects  
18 of smoking bans in mental health and addiction settings. *Psychiatr Serv*. 2002;53(12):1617-22. Epub  
19 2002/12/04.
- 20 130. Williams JM, Ziedonis D. Addressing tobacco among individuals with a mental illness or an  
21 addiction. *Addict Behav*. 2004;29(6):1067-83. Epub 2004/07/09.
- 22 131. Ziedonis DM, Guydish J, Williams J, Steinberg M, Foulds J. Barriers and solutions to  
23 addressing tobacco dependence in addiction treatment programs. *Alcohol Res Health*.  
24 2006;29(3):228-35. Epub 2007/03/22.
- 25 132. Frohlich KL, Mykhalovskiy E, Poland BD, Haines-Saah R, Johnson J. Creating the socially  
26 marginalised youth smoker: the role of tobacco control. *Sociol Health Illn*. 2012;34(7):978-93. Epub  
27 2012/03/06.
- 28 133. Cosh S, Maksimovic L, Ettridge K, Copley D, Bowden JA. Aboriginal and Torres Strait Islander  
29 utilisation of the Quitline service for smoking cessation in South Australia. *Australian Journal of*  
30 *Primary Health*. 2013;19(2):113-8.
- 31 134. Bramley D, Riddell T, Whittaker R, Corbett T, Lin RB, Wills M, et al. Smoking cessation using  
32 mobile phone text messaging is as effective in Maori as non-Maori. *N Z Med J*.  
33 2005;118(1216):U1494. Epub 2005/06/07.
- 34 135. Daley CM, James AS, Barnoskie RS, Segraves M, Schupbach R, Choi WS. "Tobacco has a  
35 purpose, not just a past": Feasibility of developing a culturally appropriate smoking cessation  
36 program for a pan-tribal native population. *Med Anthropol Q*. 2006;20(4):421-40. Epub 2007/01/18.
- 37 136. Richmond R, Indig D, Butler T, Wilhelm K, Archer V, Wodak A. A randomized controlled trial  
38 of a smoking cessation intervention conducted among prisoners. *Addiction*. 2013;108(5):966-74.  
39 Epub 2012/12/12.
- 40 137. Richmond RL, Butler T, Belcher JM, Wodak A, Wilhelm KA, Baxter E. Promoting smoking  
41 cessation among prisoners: feasibility of a multi-component intervention. *Aust N Z J Public Health*.  
42 2006;30(5):474-8. Epub 2006/11/01.
- 43 138. Siru R, Hulse GK, Tait RJ. Assessing motivation to quit smoking in people with mental illness:  
44 a review. *Addiction*. 2009;104(5):719-33. Epub 2009/05/06.
- 45 139. Dani JA, Harris RA. Nicotine addiction and comorbidity with alcohol abuse and mental illness.  
46 *Nat Neurosci*. 2005;8(11):1465-70. Epub 2005/10/28.
- 47 140. Lawn S, Hersh D, Ward PR, Tsourtos G, Muller R, Winefield A, et al. 'I just saw it as something  
48 that would pull you down, rather than lift you up': resilience in never-smokers with mental illness.  
49 *Health Educ Res*. 2011;26(1):26-38. Epub 2010/11/11.
- 50 141. Shenton AK. Strategies for ensuring trustworthiness in qualitative research projects.  
51 *Education for Information*. 2004;22(2):63-75.
- 52  
53  
54  
55  
56  
57  
58  
59  
60

- 1  
2  
3 142. Ward PR, Muller R, Tsourtos G, Hersh D, Lawn S, Winefield AH, et al. Additive and  
4 subtractive resilience strategies as enablers of biographical reinvention: a qualitative study of ex-  
5 smokers and never-smokers. *Soc Sci Med*. 2011;72(7):1140-8. Epub 2011/03/08.  
6  
7 143. McGee R, Williams S, Nada-Raja S, Olsson CA. Tobacco Smoking in Adolescence Predicts  
8 Maladaptive Coping Styles in Adulthood. *Nicotine Tob Res*. 2013;15(12):1971-7.  
9  
10 144. Gruskin EP, Greenwood GL, Matevia M, Pollack LM, Bye LL. Disparities in smoking between  
11 the lesbian, gay, and bisexual population and the general population in California. *Am J Public*  
12 *Health*. 2007;97(8):1496-502. Epub 2007/06/30.  
13  
14 145. Weber MF, Banks E, Sitas F. Smoking in migrants in New South Wales, Australia: Report on  
15 data from over 100 000 participants in the 45 and Up Study. *Drug Alcohol Rev*. 2011;30(6):597-605.  
16  
17 146. Substance Abuse and Mental Health Services Administration OoAS. Results from the 2007  
18 National Survey on Drug Use and Health: National Findings Rockville, MD.: 2008 Contract No.: DHHS  
19 Publication No. SMA 08-4343.  
20  
21 147. Fazel S, Khosla V, Doll H, Geddes J. The prevalence of mental disorders among the homeless  
22 in western countries: systematic review and meta-regression analysis. *PLoS Med*. 2008;5(12):e225.  
23 Epub 2008/12/05.  
24  
25 148. West R, McEwen A, Bolling K, Owen L. Smoking cessation and smoking patterns in the  
26 general population: a 1-year follow-up. *Addiction*. 2001;96(6):891-902. Epub 2001/06/12.  
27  
28  
29  
30  
31  
32  
33  
34  
35  
36  
37  
38  
39  
40  
41  
42  
43  
44  
45  
46  
47  
48  
49  
50  
51  
52  
53  
54  
55  
56  
57  
58  
59  
60



# PRISMA 2009 Checklist

| Section/topic                      | #  | Checklist item                                                                                                                                                                                                                                                                                              | Reported on page # |
|------------------------------------|----|-------------------------------------------------------------------------------------------------------------------------------------------------------------------------------------------------------------------------------------------------------------------------------------------------------------|--------------------|
| <b>TITLE</b>                       |    |                                                                                                                                                                                                                                                                                                             |                    |
| Title                              | 1  | Identify the report as a systematic review, meta-analysis, or both.                                                                                                                                                                                                                                         | 1                  |
| <b>ABSTRACT</b>                    |    |                                                                                                                                                                                                                                                                                                             |                    |
| Structured summary                 | 2  | Provide a structured summary including, as applicable: background; objectives; data sources; study eligibility criteria, participants, and interventions; study appraisal and synthesis methods; results; limitations; conclusions and implications of key findings; systematic review registration number. | 2                  |
| <b>INTRODUCTION</b>                |    |                                                                                                                                                                                                                                                                                                             |                    |
| Rationale                          | 3  | Describe the rationale for the review in the context of what is already known.                                                                                                                                                                                                                              | 3-4                |
| Objectives                         | 4  | Provide an explicit statement of questions being addressed with reference to participants, interventions, comparisons, outcomes, and study design (PICOS).                                                                                                                                                  | 3-5                |
| <b>METHODS</b>                     |    |                                                                                                                                                                                                                                                                                                             |                    |
| Protocol and registration          | 5  | Indicate if a review protocol exists, if and where it can be accessed (e.g., Web address), and, if available, provide registration information including registration number.                                                                                                                               | 5                  |
| Eligibility criteria               | 6  | Specify study characteristics (e.g., PICOS, length of follow-up) and report characteristics (e.g., years considered, language, publication status) used as criteria for eligibility, giving rationale.                                                                                                      | 6                  |
| Information sources                | 7  | Describe all information sources (e.g., databases with dates of coverage, contact with study authors to identify additional studies) in the search and date last searched.                                                                                                                                  | 5                  |
| Search                             | 8  | Present full electronic search strategy for at least one database, including any limits used, such that it could be repeated.                                                                                                                                                                               | See Table 1        |
| Study selection                    | 9  | State the process for selecting studies (i.e., screening, eligibility, included in systematic review, and, if applicable, included in the meta-analysis).                                                                                                                                                   | 6-7                |
| Data collection process            | 10 | Describe method of data extraction from reports (e.g., piloted forms, independently, in duplicate) and any processes for obtaining and confirming data from investigators.                                                                                                                                  | 7                  |
| Data items                         | 11 | List and define all variables for which data were sought (e.g., PICOS, funding sources) and any assumptions and simplifications made.                                                                                                                                                                       | 6 -8 (see Table 2) |
| Risk of bias in individual studies | 12 | Describe methods used for assessing risk of bias of individual studies (including specification of whether this was done at the study or outcome level), and how this information is to be used in any data synthesis.                                                                                      | 7                  |
| Summary measures                   | 13 | State the principal summary measures (e.g., risk ratio, difference in means).                                                                                                                                                                                                                               | 7                  |
| Synthesis of results               | 14 | Describe the methods of handling data and combining results of studies, if done, including measures of consistency (e.g., $I^2$ for each meta-analysis). <a href="http://bmjopen.bmj.com/site/about/guidelines.xhtml">http://bmjopen.bmj.com/site/about/guidelines.xhtml</a>                                | 7-8                |



# PRISMA 2009 Checklist

Page 1 of 2

| Section/topic                 | #  | Checklist item                                                                                                                                                                                           | Reported on page #                                  |
|-------------------------------|----|----------------------------------------------------------------------------------------------------------------------------------------------------------------------------------------------------------|-----------------------------------------------------|
| Risk of bias across studies   | 15 | Specify any assessment of risk of bias that may affect the cumulative evidence (e.g., publication bias, selective reporting within studies).                                                             | 7                                                   |
| Additional analyses           | 16 | Describe methods of additional analyses (e.g., sensitivity or subgroup analyses, meta-regression), if done, indicating which were pre-specified.                                                         | NA                                                  |
| <b>RESULTS</b>                |    |                                                                                                                                                                                                          |                                                     |
| Study selection               | 17 | Give numbers of studies screened, assessed for eligibility, and included in the review, with reasons for exclusions at each stage, ideally with a flow diagram.                                          | 8 (See Figure 1)                                    |
| Study characteristics         | 18 | For each study, present characteristics for which data were extracted (e.g., study size, PICOS, follow-up period) and provide the citations.                                                             | See supplementary files 1, 2 and 3)                 |
| Risk of bias within studies   | 19 | Present data on risk of bias of each study and, if available, any outcome level assessment (see item 12).                                                                                                | 9 (See supplementary files 4 and 5)                 |
| Results of individual studies | 20 | For all outcomes considered (benefits or harms), present, for each study: (a) simple summary data for each intervention group (b) effect estimates and confidence intervals, ideally with a forest plot. | See supplementary files 1, 2 and 3)                 |
| Synthesis of results          | 21 | Present results of each meta-analysis done, including confidence intervals and measures of consistency.                                                                                                  | See supplementary files 7 and 8 and tables 3 and 4) |
| Risk of bias across studies   | 22 | Present results of any assessment of risk of bias across studies (see Item 15).                                                                                                                          | 9-10                                                |
| Additional analysis           | 23 | Give results of additional analyses, if done (e.g., sensitivity or subgroup analyses, meta-regression [see Item 16]).                                                                                    | NA                                                  |
| <b>DISCUSSION</b>             |    |                                                                                                                                                                                                          |                                                     |
| Summary of evidence           | 24 | Summarize the main findings including the strength of evidence for each main outcome; consider their relevance to key groups (e.g., healthcare providers, users, and policy makers).                     | 11-19                                               |



# PRISMA 2009 Checklist

1  
2  
3  
4  
5  
6  
7  
8  
9  
10  
11  
12  
13  
14  
15  
16  
17  
18  
19  
20  
21  
22  
23  
24  
25  
26  
27  
28  
29  
30  
31  
32  
33  
34  
35  
36  
37  
38  
39  
40  
41  
42  
43  
44  
45  
46  
47  
48  
49

|                |    |                                                                                                                                                               |       |
|----------------|----|---------------------------------------------------------------------------------------------------------------------------------------------------------------|-------|
| Limitations    | 25 | Discuss limitations at study and outcome level (e.g., risk of bias), and at review-level (e.g., incomplete retrieval of identified research, reporting bias). | 16-17 |
| Conclusions    | 26 | Provide a general interpretation of the results in the context of other evidence, and implications for future research.                                       | 11-19 |
| <b>FUNDING</b> |    |                                                                                                                                                               |       |
| Funding        | 27 | Describe sources of funding for the systematic review and other support (e.g., supply of data); role of funders for the systematic review.                    | 1     |

From: Moher D, Liberati A, Tetzlaff J, Altman DG, The PRISMA Group (2009). Preferred Reporting Items for Systematic Reviews and Meta-Analyses: The PRISMA Statement. PLoS Med 6(6): e1000097. doi:10.1371/journal.pmed1000097

For more information, visit: [www.prisma-statement.org](http://www.prisma-statement.org).

1  
2  
3  
4  
5  
6  
7  
8  
9  
10  
11  
12  
13  
14  
15  
16  
17  
18  
19  
20  
21  
22  
23  
24  
25  
26  
27  
28  
29  
30  
31  
32  
33  
34  
35  
36  
37  
38  
39  
40  
41  
42  
43  
44  
45  
46  
47  
48  
49  
50  
51  
52  
53  
54  
55  
56  
57  
58  
59  
60



Figure 1. Database search results

190x254mm (300 x 300 DPI)

1  
2  
3  
4  
5  
6  
7  
8  
9  
10  
11  
12  
13  
14  
15  
16  
17  
18  
19  
20  
21  
22  
23  
24  
25  
26  
27  
28  
29  
30  
31  
32  
33  
34  
35  
36  
37  
38  
39  
40  
41  
42  
43  
44  
45  
46  
47  
48  
49  
50  
51  
52  
53  
54  
55  
56  
57  
58  
59  
60



250x199mm (300 x 300 DPI)

ew only



1  
2  
3  
4  
5  
6  
7  
8  
9  
10  
11  
12  
13  
14  
15  
16  
17  
18  
19  
20  
21  
22  
23  
24  
25  
26  
27  
28  
29  
30  
31  
32  
33  
34  
35  
36  
37  
38  
39  
40  
41  
42  
43  
44  
45  
46  
47  
48  
49  
50  
51  
52  
53  
54  
55  
56  
57  
58  
59  
60

**Supplementary file 1: References of full text articles that were retrieved, reviewed and excluded for not meeting inclusion criteria. Articles could meet multiple criteria for exclusion (total n = 377).**

**Low socioeconomic status studies excluded (n = 111)**

*Intervention studies*

1. Maher JE, Rohde K, Dent CW, Stark MJ, Pizacani B, Boysun MJ, et al. Is a statewide tobacco quitline an appropriate service for specific populations? *Tobacco Control*. 2007;16 Suppl 1:i65-70.
2. Miller CL, Sedivy V. Using a quitline plus low-cost nicotine replacement therapy to help disadvantaged smokers to quit. *Tobacco Control*. 2009;18(2):144-9.
3. Moffatt J, Stanton WR. Smoking and parenting among males in low socio-economic occupations. *International Journal of Health Promotion and Education*. 2005;43(3):81-6.
4. O'Brien J, Salmon A, Geikie A, Jardine A, Oakes W. Integrating smoking care in community welfare agencies to reach disadvantaged people: Findings from the Smoking Matters Project. *Health Promotion Journal of Australia*. 2010;21(3):176-82.
5. O'Loughlin J, Paradis G, Renaud L, Meshefedjian G, Barnett T. The "Yes, I Quit" smoking cessation course: does it help women in a low income community quit? *Journal of community health*. 1997;22(6):451-68.
6. Sias JJ, Urquidi UJ, Bristow ZM, Rodriguez JC, Ortiz M. Evaluation of smoking cessation behaviors and interventions among Latino smokers at low-income clinics in a US-Mexico border county. *Addictive behaviors*. 2008;33(2):373-80. Epub 2007/11/17.

*No discussion of barriers*

1. Ackerson LK, Viswanath K. Communication inequalities, social determinants, and intermittent smoking in the 2003 Health Information National Trends Survey. *Preventing chronic disease*. 2009;6(2):A40.
2. Amos A, Wiltshire S, Bostock Y, Haw S, McNeill A. 'You can't go without a fag...you need it for your hash'--a qualitative exploration of smoking, cannabis and young people. *Addiction (Abingdon, England)*. 2004;99(1):77-81. Epub 2003/12/18.
3. Arnold CL, Davis TC, Berkel HJ, Jackson RH, Nandy I, London S. Smoking status, reading level, and knowledge of tobacco effects among low-income pregnant women. *Preventive medicine*. 2001;32(4):313-20. Epub 2001/04/17.
4. Bonevski B, Bryant J, Paul C. Encouraging smoking cessation among disadvantaged groups: a qualitative study of the financial aspects of cessation. *Drug and alcohol review*. 2011;30(4):411-8. Epub 2011/03/02.
5. Donaghy E, Bauld L, Eadie D, McKell J, Pringle B, Amos A. A qualitative study of how young Scottish smokers living in disadvantaged communities get their cigarettes. *Nicotine & tobacco research : official journal of the Society for Research on Nicotine and Tobacco*. 2013;15(12):2053-9. Epub 2013/08/06.
6. Eadie D, MacAskill S, McKell J, Baybutt M. Barriers and facilitators to a criminal justice tobacco control coordinator: an innovative approach to supporting smoking cessation among offenders. *Addiction (Abingdon, England)*. 2012;107 Suppl 2:26-38. Epub 2012/11/21.
7. Gillies V, Willig C. 'You get the nicotine and that in your blood'—constructions of addiction and control in women's accounts of cigarette smoking. *Journal of Community & Applied Social Psychology*. 1997;7(4):285-301.
8. Macleod J, Smith GD, Metcalfe C, Hart C. Is subjective social status a more important determinant of health than objective social status? Evidence from a prospective observational study of Scottish men. *Social Science & Medicine*. 2005;61(9):1916-29.
9. Manfredi C, Cho YI, Crittenden KS, Dolecek TA. A path model of smoking cessation in women smokers of low socio-economic status. *Health education research*. 2007;22(5):747-56.

10. Manfredi C, Lacey L, Warnecke R, Balch G. Method effects in survey and focus group findings: understanding smoking cessation in low-SES African American women. *Health education & behavior : the official publication of the Society for Public Health Education*. 1997;24(6):786-800. Epub 1997/12/31.
11. Moore RS, McLellan DL, Tauras JA, Fagan P. Securing the health of disadvantaged women: a critical investigation of tobacco-control policy effects on women worldwide. *American Journal of Preventive Medicine*. 2009;37(2 Suppl):S117-20.
12. Pickett KE, Luo Y, Lauderdale DS. Widening social inequalities in risk for sudden infant death syndrome. *American journal of public health*. 2005;95(11):1976-81.
13. Pollak KI, Arredondo EM, Yarnall KSH, Lipkus I, Myers E, McNeilly M, et al. Influence of stereotyping in smoking cessation counselling by primary care residents. *Ethnicity and Disease*. 2002;12(4):578-84.
14. Wilson IS, Ritchie D, Amos A, Shaw A, O'Donnell R, Mills LM, et al. 'I'm not doing this for me': mothers' accounts of creating smoke-free homes. *Health Educ Res*. 2013;28(1):165-78. Epub 2012/07/31.
15. Wiltshire S, Bancroft A, Amos A, Parry O. "They're doing people a service"-qualitative study of smoking, smuggling, and social deprivation. *BMJ (Clinical research ed)*. 2001;323(7306):203-7. Epub 2001/07/28.

*No discussion of barriers to smoking cessation (e.g. might be barriers to accessing health care in general)*

1. Ackerson LK, Viswanath K. Communication inequalities, social determinants, and intermittent smoking in the 2003 Health Information National Trends Survey. *Preventing chronic disease*. 2009;6(2):A40.
2. Amos A, Wiltshire S, Bostock Y, Haw S, McNeill A. 'You can't go without a fag...you need it for your hash'--a qualitative exploration of smoking, cannabis and young people. *Addiction (Abingdon, England)*. 2004;99(1):77-81. Epub 2003/12/18.
3. Arnold CL, Davis TC, Berkel HJ, Jackson RH, Nandy I, London S. Smoking status, reading level, and knowledge of tobacco effects among low-income pregnant women. *Preventive medicine*. 2001;32(4):313-20. Epub 2001/04/17.
4. Bonevski B, Bryant J, Paul C. Encouraging smoking cessation among disadvantaged groups: a qualitative study of the financial aspects of cessation. *Drug and alcohol review*. 2011;30(4):411-8. Epub 2011/03/02.
5. Donaghy E, Bauld L, Eadie D, McKell J, Pringle B, Amos A. A qualitative study of how young Scottish smokers living in disadvantaged communities get their cigarettes. *Nicotine & tobacco research : official journal of the Society for Research on Nicotine and Tobacco*. 2013;15(12):2053-9. Epub 2013/08/06.
6. Eadie D, MacAskill S, McKell J, Baybutt M. Barriers and facilitators to a criminal justice tobacco control coordinator: an innovative approach to supporting smoking cessation among offenders. *Addiction (Abingdon, England)*. 2012;107 Suppl 2:26-38. Epub 2012/11/21.
7. Gillies V, Willig C. 'You get the nicotine and that in your blood'—constructions of addiction and control in women's accounts of cigarette smoking. *Journal of Community & Applied Social Psychology*. 1997;7(4):285-301.
8. Macleod J, Smith GD, Metcalfe C, Hart C. Is subjective social status a more important determinant of health than objective social status? Evidence from a prospective observational study of Scottish men. *Social Science & Medicine*. 2005;61(9):1916-29.
9. Manfredi C, Cho YI, Crittenden KS, Dolecek TA. A path model of smoking cessation in women smokers of low socio-economic status. *Health education research*. 2007;22(5):747-56.
10. Manfredi C, Lacey L, Warnecke R, Balch G. Method effects in survey and focus group findings: understanding smoking cessation in low-SES African American women. *Health education &*

behavior : the official publication of the Society for Public Health Education. 1997;24(6):786-800. Epub 1997/12/31.

11. Moore RS, McLellan DL, Tauras JA, Fagan P. Securing the health of disadvantaged women: a critical investigation of tobacco-control policy effects on women worldwide. *American Journal of Preventive Medicine*. 2009;37(2 Suppl):S117-20.
12. Pickett KE, Luo Y, Lauderdale DS. Widening social inequalities in risk for sudden infant death syndrome. *American journal of public health*. 2005;95(11):1976-81.
13. Pollak KI, Arredondo EM, Yarnall KSH, Lipkus I, Myers E, McNeilly M, et al. Influence of stereotyping in smoking cessation counselling by primary care residents. *Ethnicity and Disease*. 2002;12(4):578-84.
14. Wilson IS, Ritchie D, Amos A, Shaw A, O'Donnell R, Mills LM, et al. 'I'm not doing this for me': mothers' accounts of creating smoke-free homes. *Health Educ Res*. 2013;28(1):165-78. Epub 2012/07/31.
15. Wiltshire S, Bancroft A, Amos A, Parry O. "They're doing people a service"-qualitative study of smoking, smuggling, and social deprivation. *BMJ (Clinical research ed)*. 2001;323(7306):203-7. Epub 2001/07/28.
16. Copeland AL, Businelle MS, Stewart DW, Patterson SM, Rash CJ, Carney CE. Identifying Barriers to Entering Smoking Cessation Treatment Among Socioeconomically Disadvantaged Smokers. *Journal of Smoking Cessation*. 2010;5(02):164-71.
17. Jones LL, Atkinson O, Longman J, Coleman T, McNeill A, Lewis SA. The motivators and barriers to a smoke-free home among disadvantaged caregivers: identifying the positive levers for change. *Nicotine & tobacco research : official journal of the Society for Research on Nicotine and Tobacco*. 2011;13(6):479-86. Epub 2011/03/31.
18. Katainen A. Smoking and workers' autonomy: a qualitative study on smoking practices in manual work. *Health (London, England : 1997)*. 2012;16(2):134-50. Epub 2011/04/14.
19. Sheffer CE, Brackman SL, Cottoms N, Olsen M. Understanding the barriers to use of free, proactive telephone counseling for tobacco dependence. *Qualitative health research*. 2011;21(8):1075-85. Epub 2011/04/06.

*Not carried out in high income country/not published in English*

1. Ossip-Klein DJ, Fisher S, Diaz S, Quiñones Z, Sierra E, Dozier A, et al. Tobacco use in six economically disadvantaged communities in the Dominican Republic. *Nicotine & Tobacco Research*. 2008;10(5):851-60.

*Not reporting the perceived self-reported barriers to smoking cessation (e.g. might report results of logistic regressions showing nicotine dependence associated with cessation success)*

1. Bhandari S, Levitch AH, Ellis KK, Ball K, Everett K, Geden E, et al. Comparative analyses of stressors experienced by rural low-income pregnant women experiencing intimate partner violence and those who are not. *Journal of obstetric, gynecologic, and neonatal nursing : JOGNN / NAACOG*. 2008;37(4):492-501. Epub 2008/08/30.
2. Caleyachetty A, Lewis S, McNeill A, Leonardi-Bee J. Struggling to make ends meet: exploring pathways to understand why smokers in financial difficulties are less likely to quit successfully. *European journal of public health*. 2012;22 Suppl 1:41-8.
3. Colgan Y, Turnbull DA, Mikocka-Walus AA, Delfabbro P. Determinants of resilience to cigarette smoking among young Australians at risk: An exploratory study. *Tobacco Induced Diseases*. 2010;8(1).
4. Collins BN, Nair U, Hovell MF, Audrain-McGovern J. Smoking-related weight concerns among underserved, black maternal smokers. *American journal of health behavior*. 2009;33(6):699-709. Epub 2009/03/27.

- 1
  - 2
  - 3
  - 4
  - 5
  - 6
  - 7
  - 8
  - 9
  - 10
  - 11
  - 12
  - 13
  - 14
  - 15
  - 16
  - 17
  - 18
  - 19
  - 20
  - 21
  - 22
  - 23
  - 24
  - 25
  - 26
  - 27
  - 28
  - 29
  - 30
  - 31
  - 32
  - 33
  - 34
  - 35
  - 36
  - 37
  - 38
  - 39
  - 40
  - 41
  - 42
  - 43
  - 44
  - 45
  - 46
  - 47
  - 48
  - 49
  - 50
  - 51
  - 52
  - 53
  - 54
  - 55
  - 56
  - 57
  - 58
  - 59
  - 60
5. Cummings KM, Hyland A, Giovino GA, Hastrup JL, Bauer JE, Bansal MA. Are smokers adequately informed about the health risks of smoking and medicinal nicotine? *Nicotine & Tobacco Research*. 2004;6 Suppl 3:S333-40.
6. de Beyer J, Lovelace C, Yürekli A. Poverty and tobacco. *Tobacco Control*. 2001;10(3):210-1.
7. De Silva V, Samarasinghe D, Hanwella R. Association between concurrent alcohol and tobacco use and poverty. *Drug & Alcohol Review*. 2011;30(1):69-73.
8. Graham H. Women and smoking: Understanding socioeconomic influences. *Drug and Alcohol Dependence*. 2009;104(Suppl1):S11-S6.
9. Graham H, Der G. Influences on women's smoking status: the contribution of socioeconomic status in adolescence and adulthood. *European journal of public health*. 1999;9(2):137-41.
10. Graham H, Der G. Patterns and predictors of smoking cessation among British women. *Health promotion international*. 1999;14(3):231-9.
11. Graham H, Der G. Patterns and predictors of tobacco consumption among women. *Health education research*. 1999;14(5):611-8.
12. Graham H, Francis B, Inskip HM, Harman J, Team SWSS. Socioeconomic lifecourse influences on women's smoking status in early adulthood. *Journal of Epidemiology & Community Health*. 2006;60(3):228-33.
13. Graham H, Hawkins SS, Law C. Lifecourse influences on women's smoking before, during and after pregnancy. *Social Science & Medicine*. 2010;70(4):582-7.
14. Graham H, Inskip HM, Francis B, Harman J. Pathways of disadvantage and smoking careers: Evidence and policy implications. *Journal of epidemiology and community health*. 2006;60(Suppl 2):7-12.
15. Graham H, Owen L. Are there socioeconomic differentials in under-reporting of smoking in pregnancy? *Tobacco Control*. 2003;12(4):434.
16. Harwood GA, Salsberry P, Ferketich AK, Wewers ME. Cigarette smoking, socioeconomic status, and psychosocial factors: examining a conceptual framework. *Public health nursing (Boston, Mass)*. 2007;24(4):361-71. Epub 2007/06/08.
17. Heulton C, Nelson K. Going public. Reversal of misfortune: viewing tobacco as a social justice issue. *American journal of public health*. 2004;94(2):186-91.
18. Kim DH, Daskalakis C, Plumb JD, Adams S, Brawer R, Orr N, et al. Modifiable cardiovascular risk factors among individuals in low socioeconomic communities and homeless shelters. *Family & community health*. 2008;31(4):269-80.
19. Kleinjan M, van den Eijnden RJJM, Engels RCME. Adolescents' rationalizations to continue smoking: the role of disengagement beliefs and nicotine dependence in smoking cessation. *Addictive behaviors*. 2009;34(5):440-5.
20. Lacey LP, Manfredi C, Balch G, Warnecke RB, Allen K, Edwards C. Social support in smoking cessation among black women in Chicago public housing. *Public Health Reports*. 1993;108(3):387-94.
21. Lennox AS. Determinants of outcome in smoking cessation. *British Journal of General Practice*. 1992;42(359):247-52.
22. Lindström M. Social capital, social class and tobacco smoking. *Expert Review of Pharmacoeconomics & Outcomes Research*. 2008;8(1):81-9.
23. Manfredi C, Lacey L, Warnecke R, Buis M. Smoking-related behavior, beliefs, and social environment of young black women in subsidized public housing in Chicago. *American journal of public health*. 1992;82(2):267-72. Epub 1992/02/01.
24. Morrow M, Barraclough S. Gender equity and tobacco control: bringing masculinity into focus. *Global health promotion*. 2010;17(1 Suppl):21-8.
25. O'Loughlin J, Paradis G, Renaud L, Sanchez Gomez L. One-year predictors of smoking initiation and of continued smoking among elementary schoolchildren in multiethnic, low-income, inner-city neighbourhoods. *Tobacco Control*. 1998;7(3):268-75.

26. Ostroff JS, Shuk E, Krebs P, Lu W-H, Burkhalter J, Cortez-Weir J, et al. Qualitative evaluation of a new tobacco cessation training curriculum for patient navigators. *Journal of Cancer Education*. 2011;26(3):427-35.
27. Pickett K, Wilkinson R, Wakschlag L. The psychosocial context of pregnancy smoking and quitting in the Millennium Cohort Study. *Journal of epidemiology and community health*. 2009;63(6):474-80.
28. Pickett KE, Wakschlag LS, Rathouz PJ, Leventhal BL, Abrams B. The working-class context of pregnancy smoking. *Health & place*. 2002;8(3):167-75.
29. Reitzel LR, Vidrine JI, Li Y, Mullen PD, Velasquez MM, Cinciripini PM, et al. The influence of subjective social status on vulnerability to postpartum smoking among young pregnant women. *American journal of public health*. 2007;97(8):1476-82.
30. Roberts-Clarke I, Morokoff P, Bane C, Ruggiero L. Characteristics of Smoking in Low-Income Pregnant Latina and White Women. *Journal of Community Health Nursing*. 2002;19(2):77-81.
31. Rooke C, Amos A, Hight G, Hargreaves K. Smoking spaces and practices in pubs, bars and clubs: young adults and the English smokefree legislation. *Health Place*. 2013;19:108-15. Epub 2012/12/12.
32. Ryckman KA, Bercaw DM, Ellis MR, Wolf DG. What predicts a successful smoking cessation attempt? *The Journal of family practice*. 2006;55(9):No Pagination Specified.
33. Sheahan SL, Free TA, Rayens MK. Smoking behavior and desire to quit among low-income female caregivers. *Applied nursing research : ANR*. 2003;16(3):156-63. Epub 2003/08/22.
34. Siahpush M, Borland R, Scollo M. Prevalence and socio-economic correlates of smoking among lone mothers in Australia. *Australian & New Zealand Journal of Public Health*. 2002;26(2):132-5.
35. Siahpush M, Borland R, Scollo M. Smoking and financial stress. *Tobacco Control*. 2003;12(1):60-6.
36. Siahpush M, Borland R, Yong HH. Sociodemographic and psychosocial correlates of smoking-induced deprivation and its effect on quitting: findings from the International Tobacco Control Policy Evaluation Survey. *Tobacco Control*. 2007;16(2):e2-e.
37. Siegel D, Faigeles B. Smoking and socioeconomic status in a population-based inner city sample of African-Americans, Latinos and whites. *Journal of Cardiovascular Risk*. 1996;3(3):295-300.
38. Snell C, Bailey L. Operation storefront: observations of tobacco retailer advertising and compliance with tobacco laws. *Youth Violence & Juvenile Justice*. 2005;3(1):78-90.
39. Solberg LI, Parker ED, Foldes SS, Walker PF. Disparities in tobacco cessation medication orders and fills among special populations. *Nicotine & Tobacco Research*. 2010;12(2):144-51.

#### *Population level study*

1. Adams RJ, Howard N, Tucker G, Appleton S, Taylor AW, Chittleborough C, et al. Effects of area deprivation on health risks and outcomes: A multilevel, cross-sectional, Australian population study. *International journal of public health*. 2009;54(3):183-92.
2. Graham H, Hunt S. Women's smoking and measures of women's socioeconomic status in the United Kingdom. *Health promotion international*. 1994;9(2):81-8.
3. Hiscock R, Bauld L, Amos A, Platt S. Smoking and socioeconomic status in England: the rise of the never smoker and the disadvantaged smoker. *Journal of public health (Oxford, England)*. 2012;34(3):390-6. Epub 2012/03/01.
4. Leung J, Gartner C, Dobson A, Lucke J, Hall W. Psychological distress is associated with tobacco smoking and quitting behaviour in the Australian population: Evidence from national cross-sectional surveys. *Australian and New Zealand Journal of Psychiatry*. 2011;45(2):170-8.
5. Smith GD, Hart C. "Socioeconomic factors, health behaviors, and mortality: Results from a nationally representative prospective study of US adults": Comment. *JAMA: Journal of the American Medical Association*. 1998;280(20):1744-5.

*Reviews (reviews conducted on smoking within the defined disadvantaged group but not reporting on perceived barriers to smoking cessation)*

1. Doolan DM, Froelicher ES. Efficacy of smoking cessation intervention among special populations: review of the literature from 2000 to 2005. *Nursing research*. 2006;55(4S):S29-37.
2. Frazier LM, Molgaard CA, Fredrickson DD, Early JL, Schukman JS, Dismuke SE. Barriers to smoking cessation initiatives for Medicaid clients in managed care. *Substance use & misuse*. 2001;36(13):1875-99. Epub 2002/01/25.
3. Geckova A, van Dijk JP, van Ittersum-Gritter T, Groothoff JW, Post D. Determinants of adolescents' smoking behaviour: a literature review. *Central European Journal of Public Health*. 2002;10(3):79-87.
4. Greaves L, Jategaonkar N. Tobacco policies and vulnerable girls and women: toward a framework for gender sensitive policy development. *Journal of epidemiology and community health*. 2006;60 Suppl 2:57-65. Epub 2007/08/22.
5. Kim SS, Ziedonis D, Chen K. Tobacco use and dependence in Asian American and Pacific Islander adolescents: a review of the literature. *Journal of Ethnicity in Substance Abuse*. 2007;6(3-4):113-42.
6. Lodge N. The identified needs of ethnic minority groups with cancer within the community: a review of the literature. *European Journal of Cancer Care*. 2001;10(4):234-44.
7. Power J, Grealay C, Rintoul D. Tobacco interventions for Indigenous Australians: a review of current evidence. *Health Promotion Journal of Australia*. 2009;20(3):186-94.
8. Schneider S, Schutz J. Who smokes during pregnancy? A systematic literature review of population-based surveys conducted in developed countries between 1997 and 2006. *The European Journal of Contraception and Reproductive Health Care*. 2008;13(2):138-47.
9. Seo D-C, Huang Y. Systematic review of social network analysis in adolescent cigarette smoking behavior. *Journal of School Health*. 2012;82(1):21-7.

*Studies not meeting the subgroup definition*

1. Abdullah ASM, Ho LM, Kwan YH, Cheung WL, McGhee SM, Chan WH. Promoting smoking cessation among the elderly: What are the predictors of intention to quit and successful quitting? *Journal of aging and health* 2006;18(4):552-64
2. Adams E, Melvin CL, Raskind-Hood CL. Sociodemographic, insurance, and risk profiles of maternal smokers post the 1990s: How can we reach them? *Nicotine & Tobacco Research* 2008;10(7):1121-29
3. Aitken PP, Davies JK, Leathar DS. Smoking prevalence and beliefs among adult Scots: implications for health education. *International journal of health education* 1982;24(3):164-75
4. Blackburn C, Bonas S, Spencer N, Dolan A, Coe C, Moy R. Smoking behaviour change among fathers of new infants. *Social Science & Medicine* 2005;61(3):517-26
5. Denham SA, Meyer MG, Toborg MA. Tobacco cessation in adolescent females in Appalachian communities. *Family & community health* 2004;27(2):170-81
6. Ko M, Schulken ED. Factors related to smoking cessation and relapse among pregnant smokers. *American journal of health behavior* 1998;22(2):83-89
7. Kruger TM, Howell BM, Haney A, Davis RE, Fields N, Schoenberg NE. Perceptions of smoking cessation programs in rural Appalachia. *American journal of health behavior* 2012;36(3):373-84 doi: 10.5993/ajhb.36.3.8[published Online First: Epub Date] |.
8. Lawn S, Hersh D, Ward PR, et al. 'I just saw it as something that would pull you down, rather than lift you up!': resilience in never-smokers with mental illness. *Health Educ Res* 2011;26(1):26-38 doi: 10.1093/her/cyq065[published Online First: Epub Date] |.
9. Macnee CL, Talsma A. Development and testing of the barriers to cessation scale. *Nursing research* 1995;44(4):214-9

10. Northridge ME, Vallone D, Xiao H, et al. The importance of location for tobacco cessation: rural-urban disparities in quit success in underserved West Virginia counties. *Journal of Rural Health* 2008;**24**(2):106-15
11. Owers RC, Ballard KD. "What else is there to do?"--A qualitative study of the barriers to soldiers stopping smoking. *Journal of the Royal Army Medical Corps* 2008;**154**(3):152-5
12. Payne S. 'Smoke like a man, die like a man?': A review of the relationship between gender, sex and lung cancer. *Social Science and Medicine* 2001;**53**(8):1067-80
13. Pletsch PK, Morgan S, Pieper AF. Context and beliefs about smoking and smoking cessation. *MCN. The American journal of maternal child nursing* 2003;**28**(5):320-5
14. Ripley-Moffitt CE, Goldstein AO, Fang WL, Butzen AY, Walker S, Lohr JA. Safe babies: a qualitative analysis of the determinants of postpartum smoke-free and relapse states. *Nicotine & tobacco research : official journal of the Society for Research on Nicotine and Tobacco* 2008;**10**(8):1355-64 doi: 10.1080/14622200802238936[published Online First: Epub Date] |.
15. Shervington DO. Attitudes and practices of African-American women regarding cigarette smoking: implications for interventions. *Journal of the National Medical Association* 1994;**86**(5):337-43
16. Ward PR, Muller R, Tsourtos G, et al. Additive and subtractive resilience strategies as enablers of biographical reinvention: a qualitative study of ex-smokers and never-smokers. *Social science & medicine (1982)* 2011;**72**(7):1140-8 doi: 10.1016/j.socscimed.2011.01.023[published Online First: Epub Date] |.
17. Wewers ME, Ahijevych KL, Chen MS, Dresbach S, Kihm KE, Kuun PA. Tobacco use characteristics among rural Ohio Appalachians. *Journal of community health* 2000;**25**(5):377-88

### **Indigenous studies (n = 68)**

#### *Intervention studies*

1. Choi WS, Faseru B, Beebe LA, Greiner AK, Yeh HW, Shireman TI, et al. Culturally-tailored smoking cessation for American Indians: study protocol for a randomized controlled trial. *Trials* 2011;**12**:126. Epub 2011/05/20.
2. Daley CM, James AS, Barnoskie RS, Segraves M, Schupbach R, Choi WS. "Tobacco has a purpose, not just a past": Feasibility of developing a culturally appropriate smoking cessation program for a pan-tribal native population. *Medical anthropology quarterly*. 2006;**20**(4):421-40. Epub 2007/01/18.
3. Glover M, Bosman A, Wagemakers A, Kira A, Paton C, Cowie N. An innovative team-based stop smoking competition among Maori and Pacific Island smokers: rationale and method for the study and its evaluation. *BMC public health*. 2013;**13**:1228. Epub 2013/12/25.
4. Harvey D, Tsey K, Cadet-James Y, Minniecon D, Ivers R, McCalman J, et al. An evaluation of tobacco brief intervention training in three indigenous health care settings in north Queensland. *Australian and New Zealand journal of public health*. 2002;**26**(5):426-31. Epub 2002/11/05.
5. Ivers RG, Farrington M, Burns CB, Bailie RS, D'Abbs PH, Richmond RL, et al. A study of the use of free nicotine patches by Indigenous people. *Australian and New Zealand journal of public health*. 2003;**27**(5):486-90. Epub 2003/12/04.
6. Johnston V, Walker N, Thomas DP, Glover M, Chang AB, Bullen C, et al. The study protocol for a randomized controlled trial of a family-centred tobacco control program about environmental tobacco smoke (ETS) to reduce respiratory illness in Indigenous infants. *BMC public health*. 2010;**10**:114. Epub 2010/03/09.
7. Makosky Daley C, Cowan P, Nollen NL, Greiner KA, Choi WS. Assessing the scientific accuracy, readability, and cultural appropriateness of a culturally targeted smoking cessation program for American Indians. *Health promotion practice*. 2009;**10**(3):386-93. Epub 2008/03/08.
8. Patten CA, Windsor RA, Renner CC, Enoch C, Hochreiter A, Nevak C, et al. Feasibility of a tobacco cessation intervention for pregnant Alaska Native women. *Nicotine & tobacco research :*

1  
2  
3 official journal of the Society for Research on Nicotine and Tobacco. 2010;12(2):79-87. Epub  
4 2009/12/19.  
5  
6

7  
8 *No discussion of barriers*  
9

- 10 1. Dennis MK, Momper SL. "It's bad around here now": tobacco, alcohol and other drug use  
11 among American Indians living on a rural reservation. Journal of ethnicity in substance abuse.  
12 2012;11(2):130-48. Epub 2012/06/12.
- 13 2. DiGiacomo M, Davidson PM, Davison J, Moore L, Abbott P. Stressful life events, resources,  
14 and access: key considerations in quitting smoking at an Aboriginal Medical Service. Australian and  
15 New Zealand journal of public health. 2007;31(2):174-6. Epub 2007/04/28.
- 16 3. Forster JL, Brokenleg I, Rhodes KL, Lamont GR, Poupart J. Cigarette smoking among  
17 American Indian youth in Minneapolis-St. Paul. American journal of preventive medicine. 2008;35(6  
18 Suppl):S449-56. Epub 2008/11/26.
- 19 4. Forster JL, Rhodes KL, Poupart J, Baker LO, Davey C, American Indian Community Tobacco  
20 Project Steering C. Patterns of tobacco use in a sample of American Indians in Minneapolis-St. Paul.  
21 Nicotine & tobacco research : official journal of the Society for Research on Nicotine and Tobacco.  
22 2007;9 Suppl 1:S29-37. Epub 2007/03/17.
- 23 5. Horn K, Noerachmanto N, Dino G, Manzo K, Brayboy M. Who wants to quit? Characteristics  
24 of American Indian youth who seek smoking cessation intervention. Journal of community health.  
25 2009;34(2):153-63.
- 26 6. Thomas DP, Johnston V, Fitz JW, McDonnell J. Monitoring local trends in Indigenous tobacco  
27 consumption. Australian and New Zealand journal of public health. 2009;33(1):64-6. Epub  
28 2009/02/25.

29  
30  
31  
32  
33 *No discussion of barriers to smoking cessation (e.g. might be barriers to accessing health care in*  
34 *general)*  
35

- 36 1. Beals J, Novins DK, Spicer P, Whitesell NR, Mitchell CM, Manson SM, et al. Help seeking for  
37 substance use problems in two American Indian reservation populations. Psychiatric services  
38 (Washington, DC). 2006;57(4):512-20. Epub 2006/04/11.
- 39 2. Berg CJ, Daley CM, Nazir N, Cully A, Pacheco CM, Buchanan T, et al. Smoke-Free Policies in  
40 the Workplace and in the Home among American Indians. Journal of health disparities research and  
41 practice. 2012;5(2):81-91. Epub 2012/01/01.
- 42 3. Bottorff JL, Carey J, Mowatt R, Varcoe C, Johnson JL, Hutchinson P, et al. Bingo halls and  
43 smoking: perspectives of First Nations women. Health & place. 2009;15(4):1014-21. Epub  
44 2009/06/02.
- 45 4. Bottorff JL, Johnson JL, Carey J, Hutchinson P, Sullivan D, Mowatt R, et al. A family affair:  
46 Aboriginal women's efforts to limit second-hand smoke exposure at home. Canadian journal of  
47 public health = Revue canadienne de sante publique. 2010;101(1):32-5. Epub 2010/04/07.
- 48 5. Filippi MK, McCloskey C, Williams C, Bull JW, Choi WS, Greiner KA, et al. Perceptions,  
49 barriers, and suggestions for creation of a tobacco and health website among American  
50 Indian/Alaska Native college students. Journal of community health. 2013;38(3):486-91. Epub  
51 2012/11/15.
- 52 6. Glover M, Fraser T, Nosa V. Views of Low Socio-Economic Smokers: What Will Help Them to  
53 Quit? Journal of Smoking Cessation. 2012;7(01):41-6.
- 54 7. Hemsing N, Greaves L, Poole N, Bottorff J. Reshuffling and relocating: the gendered and  
55 income-related differential effects of restricting smoking locations. Journal of environmental and  
56 public health. 2012;2012:907832. Epub 2012/05/24.
- 57 8. Johnston V, Westphal DW, Earnshaw C, Thomas DP. Starting to smoke: a qualitative study of  
58 the experiences of Australian indigenous youth. BMC public health. 2012;12:963. Epub 2012/11/13.  
59  
60



9. Klemp P, Robertson MC, Stansfield S, Klemp JA, Harding E. Factors associated with smoking and the reasons for stopping in Maori and Europeans: a comparative study. *The New Zealand medical journal*. 1998;111(1064):148-501. Epub 1998/06/05.
10. Leavy J, Wood L, Phillips F, Rosenberg M. Try and try again--qualitative insights into adolescent smoking experimentation and notions of addiction. *Health promotion journal of Australia : official journal of Australian Association of Health Promotion Professionals*. 2010;21(3):208-14. Epub 2010/12/02.
11. LeMaster PL, Connell CM, Mitchell CM, Manson SM. Tobacco use among American Indian adolescents: protective and risk factors. *The Journal of adolescent health : official publication of the Society for Adolescent Medicine*. 2002;30(6):426-32. Epub 2002/06/01.
12. Mitschke DB, Matsunaga DS, Loebl K, Tatafu E, Jr., Robinett H. Multi-ethnic adolescents' attitudes toward smoking: a focus group analysis. *American Journal of Health Promotion*. 2008;22(6):393-9.
13. Nadeau M, Blake N, Poupart J, Rhodes K, Forster JL. Circles of Tobacco Wisdom: learning about traditional and commercial tobacco with Native elders. *American journal of preventive medicine*. 2012;43(5 Suppl 3):S222-8. Epub 2012/10/25.
14. Nez Henderson P, Kanekar S, Wen Y, Buchwald D, Goldberg J, Choi W, et al. Patterns of cigarette smoking initiation in two culturally distinct American Indian tribes. *American journal of public health*. 2009;99(11):2020-5. Epub 2009/10/13.
15. Struthers R, Hodge FS. Sacred tobacco use in Ojibwe communities. *Journal of holistic nursing : official journal of the American Holistic Nurses' Association*. 2004;22(3):209-25. Epub 2004/08/07.
16. Thomas DP, Briggs V, Anderson IP, Cunningham J. The social determinants of being an Indigenous non-smoker. *Australian and New Zealand journal of public health*. 2008;32(2):110-6. Epub 2008/04/17.
17. Thomas DP, Ferguson M, Johnston V, Brimblecombe J. Impact and perceptions of tobacco tax increase in remote Australian aboriginal communities. *Nicotine & tobacco research : official journal of the Society for Research on Nicotine and Tobacco*. 2013;15(6):1099-106. Epub 2012/11/21.
18. Unger JB, Rohrbach LA, Cruz TB, Baezconde-Garbanati L, Howard KA, Palmer PH, et al. Ethnic variation in peer influences on adolescent smoking. *Nicotine & tobacco research : official journal of the Society for Research on Nicotine and Tobacco*. 2001;3(2):167-76. Epub 2001/06/14.
19. Unger JB, Shakib S, Cruz TB, Hoffman BR, Pitney BH, Rohrbach LA. Smoking behavior among urban and rural Native American adolescents in California. *American journal of preventive medicine*. 2003;25(3):251-4. Epub 2003/09/26.
20. Unger JB, Soto C, Baezconde-Garbanati L. Perceptions of ceremonial and nonceremonial uses of tobacco by American-Indian adolescents in California. *The Journal of adolescent health : official publication of the Society for Adolescent Medicine*. 2006;38(4):443 e9-16. Epub 2006/03/22.
21. van Esdonk T, Glover M, Kira A, Wagemakers A. Reducing Smoking in Pregnancy Among Maori Women: "Aunties" Perceptions and Willingness to Help. *Maternal and child health journal*. 2013. Epub 2013/11/12.

*Not reporting the perceived self-reported barriers to smoking cessation (e.g. might report results of logistic regressions showing nicotine dependence associated with cessation success)*

1. Baezconde-Garbanati L, Beebe LA, Perez-Stable EJ. Building capacity to address tobacco-related disparities among American Indian and Hispanic/Latino communities: conceptual and systemic considerations. *Addiction (Abingdon, England)*. 2007;102 Suppl 2:112-22. Epub 2007/10/06.
2. Beebe LA, Vesely SK, Oman RF, Tolma E, Aspy CB, Rodine S. Protective assets for non-use of alcohol, tobacco and other drugs among urban American Indian youth in Oklahoma. *Maternal & Child Health Journal*. 2008;12:S82-90.

3. Butler S, Williams M, Paterson J, Tukuitonga C. Smoking among mothers of a Pacific Island birth cohort in New Zealand: associated factors. *The New Zealand medical journal*. 2004;117(1206):U1171.
4. Cosh S, Maksimovic L, Ettridge K, Copley D, Bowden JA. Aboriginal and Torres Strait Islander utilisation of the Quitline service for smoking cessation in South Australia. *Australian journal of primary health*. 2013;19(2):113-8. Epub 2012/09/07.
5. Daley CM, Faseru B, Nazir N, Solomon C, Greiner KA, Ahluwalia JS, et al. Influence of traditional tobacco use on smoking cessation among American Indians. *Addiction (Abingdon, England)*. 2011;106(5):1003-9. Epub 2011/02/11.
6. Daley CM, Greiner KA, Nazir N, Daley SM, Solomon CL, Braiuca SL, et al. All Nations Breath of Life: using community-based participatory research to address health disparities in cigarette smoking among American Indians. *Ethnicity & disease*. 2010;20(4):334-8. Epub 2011/02/11.
7. Faseru B, Daley CM, Gajewski B, Pacheco CM, Choi WS. A longitudinal study of tobacco use among American Indian and Alaska Native tribal college students. *BMC public health*. 2010;10:617. Epub 2010/10/20.
8. Gilligan C, Sanson-Fisher RW, D'Este C, Eades S, Wenitong M. Knowledge and attitudes regarding smoking during pregnancy among Aboriginal and Torres Strait Islander women. *The Medical journal of Australia*. 2009;190(10):557-61.
9. Gould GS, McEwen A, Munn J. Jumping the hurdles for smoking cessation in pregnant Aboriginal and Torres Strait Islander women in Australia. *Journal of Smoking Cessation*. 2011;6(1):33-6.
10. Henderson PN, Rhoades D, Henderson JA, Welty TK, Buchwald D. Smoking cessation and its determinants among older American Indians: the Strong Heart Study. *Ethnicity & disease*. 2004;14(2):274-9.
11. Hodge F, Nandy K. Factors associated with American Indian cigarette smoking in rural settings. *International journal of environmental research and public health*. 2011;8(4):944-54.
12. Hutchinson PJ, Richardson CG, Bottorff JL. Emergent cigarette smoking, correlations with depression and interest in cessation among Aboriginal adolescents in British Columbia. *Canadian Journal of Public Health*. 2008;99(5):418-22.
13. Johnston V, Thomas DP, McDonnell J, Andrews RM. Maternal smoking and smoking in the household during pregnancy and postpartum: findings from an Indigenous cohort in the Northern Territory. *The Medical journal of Australia*. 2011;194(10):556-9. Epub 2011/06/08.
14. Kendzor DE, Businelle MS, Reitzel LR, Rios DM, Scheuermann TS, Pulvers K, et al. Everyday discrimination is associated with nicotine dependence among African American, Latino, and White smokers. *Nicotine & tobacco research : official journal of the Society for Research on Nicotine and Tobacco*. 2014;16(6):633-40. Epub 2013/12/05.
15. Nez Henderson P, Jacobsen C, Beals J, Team A-S. Correlates of cigarette smoking among selected Southwest and Northern plains tribal groups: the AI-SUPERPPF Study. *American journal of public health*. 2005;95(5):867-72. Epub 2005/04/28.
16. Okamoto SK, Helm S, Pel S, McClain LL, Hill AP, Hayashida JK. Developing empirically based, culturally grounded drug prevention interventions for indigenous youth populations. *The journal of behavioral health services & research*. 2014;41(1):8-19. Epub 2012/11/29.
17. Yu M, Stiffman AR, Freedenthal S. Factors affecting American Indian adolescent tobacco use. *Addictive Behaviors*. 2005;30(5):889-904.

#### *Population level study*

1. Reed MB, Burns DM. A population-based examination of racial and ethnic differences in receiving physicians' advice to quit smoking. *Nicotine and Tobacco Research*. 2008;10(9):1487-94.

*Reviews (reviews conducted on smoking within the defined disadvantaged group but not reporting on perceived barriers to smoking cessation)*

1. Conigrave KM, Lee KS. Smoking or alcohol dependence among Indigenous Australians: treatment may be needed, not just education. *Heart, lung & circulation*. 2012;21(10):626-31. Epub 2012/07/24.
2. Cox LS, Okuyemi K, Choi WS, Ahluwalia JS. A review of tobacco use treatments in U.S. ethnic minority populations. *American journal of health promotion : AJHP*. 2011;25(5 Suppl):S11-30. Epub 2011/04/29.
3. DiGiacomo M, Davidson PM, Abbott PA, Davison J, Moore L, Thompson SC. Smoking cessation in indigenous populations of Australia, New Zealand, Canada, and the United States: elements of effective interventions. *International journal of environmental research and public health*. 2011;8(2):388-410. Epub 2011/05/11.
4. Ivers RG. A review of tobacco interventions for Indigenous Australians. *Australian and New Zealand journal of public health*. 2003;27(3):294-9. Epub 2004/01/07.
5. Johnston V, Westphal DW, Glover M, Thomas DP, Segan C, Walker N. Reducing smoking among indigenous populations: new evidence from a review of trials. *Nicotine & tobacco research : official journal of the Society for Research on Nicotine and Tobacco*. 2013;15(8):1329-38. Epub 2013/03/23.
6. King TK, Borrelli B, Black C, Pinto BM, Marcus BH. Minority women and tobacco: implications for smoking cessation interventions. *Annals of behavioral medicine : a publication of the Society of Behavioral Medicine*. 1997;19(3):301-13. Epub 1997/07/01.
7. Kong G, Singh N, Krishnan-Sarin S. A review of culturally targeted/tailored tobacco prevention and cessation interventions for minority adolescents. *Nicotine & tobacco research : official journal of the Society for Research on Nicotine and Tobacco*. 2012;14(12):1394-406. Epub 2012/05/23.
8. Stolberg VB. A cross-cultural and historical survey of tobacco use among various ethnic groups. *Journal of ethnicity in substance abuse*. 2007;6(3-4):9-80. Epub 2007/01/01.

#### *Studies not meeting the subgroup definition*

1. Bond C, Brough M, Spurling G, Hayman N. 'It had to be my choice' Indigenous smoking cessation and negotiations of risk, resistance and resilience. *Health, Risk & Society*. 2012;14(6):565-81.
2. Haines RJ, Oliffe JL, Bottorff JL, Poland BD. 'The missing picture': tobacco use through the eyes of smokers. *Tobacco control*. 2010;19(3):206-12. Epub 2010/05/27.
3. Johnston V, Thomas DP. What works in Indigenous tobacco control? The perceptions of remote Indigenous community members and health staff. *Health promotion journal of Australia : official journal of Australian Association of Health Promotion Professionals*. 2010;21(1):45-50. Epub 2010/04/22.
4. Kraemer KM, McLeish AC, Jeffries ER, Avallone KM, Luberto CM. Distress tolerance and perceived barriers to smoking cessation. *Substance abuse : official publication of the Association for Medical Education and Research in Substance Abuse*. 2013;34(3):277-82. Epub 2013/07/13.
5. Lubetkin EI, Lu WH, Krebs P, Yeung H, Ostroff JS. Exploring primary care providers' interest in using patient navigators to assist in the delivery of tobacco cessation treatment to low income, ethnic/racial minority patients. *Journal of community health*. 2010;35(6):618-24. Epub 2010/03/26.
6. Renner CC, Enoch C, Patten CA, Ebbert JO, Hurt RD, Moyer TP, et al. Iqmik: a form of smokeless tobacco used among Alaska natives. *American journal of health behavior*. 2005;29(6):588-94. Epub 2005/12/13.
7. Wise M, Massi L, Rose M, Nancarrow H, Conigrave K, Bauman A, et al. Developing and implementing a state-wide Aboriginal health promotion program: the process and factors influencing successful delivery. *Health promotion journal of Australia : official journal of Australian Association of Health Promotion Professionals*. 2012;23(1):25-9. Epub 2012/06/27.

### Mental illness studies (n = 90)

#### *Intervention studies*

1. Ames SC, Croghan IT, Clark MM, Patten CA, Stevens SR, Schroeder DR, et al. Change in perceived stress, partner support, decisional balance, and self-efficacy following residential nicotine dependence treatment. *Journal of Addictive Diseases*. 2008;27(1):73-82.
2. Van Dongen CJ, Kriz P, Fox KA, Haque I. A quit smoking group pilot study. *Journal of Psychosocial Nursing & Mental Health Services*. 1999;37(12):31.
3. Weinberger AH, Hitsman B, Papandonatos GD, Sacco KA, Vessicchio JC, George TP. Predictors of abstinence and changes in psychiatric symptoms in a pooled sample of smokers with schizophrenia receiving combination pharmacotherapy and behavioral therapy for smoking cessation. *Journal of Clinical Psychopharmacology*. 2009;29(6):601-3.
4. Williams JM, Ziedonis DM, Vreeland B, Speelman-Edwards N, Zechner MR, Williams MT, et al. A wellness approach to addressing tobacco in mental health settings: learning about healthy living. *American Journal of Psychiatric Rehabilitation*. 2009;12(4):352-69.

#### *No discussion of barriers*

1. Acton GS, Kunz JD, Wilson M, Hall SM. The construct of internalization: conceptualization, measurement, and prediction of smoking treatment outcome. *Psychological Medicine*. 2005;35(3):395-408.
2. Carr S, Lhussier M, Forster N, Geddes L, Deane K, Pennington M, et al. An evidence synthesis of qualitative and quantitative research on component intervention techniques, effectiveness, cost-effectiveness, equity and acceptability of different versions of health-related lifestyle advisor role in improving health. *Health Technology Assessment*. 2011;15(9):1-284.
3. Cooper J, Mancuso SG, Borland R, Slade T, Galletly C, Castle D. Tobacco smoking among people living with a psychotic illness: the second Australian Survey of Psychosis. *The Australian and New Zealand journal of psychiatry*. 2012;46(9):851-63. Epub 2012/05/31.
4. Hapke U, Schumann A, Rumpf HJ, John U, Konerding U, Meyer C. Association of smoking and nicotine dependence with trauma and posttraumatic stress disorder in a general population sample. *The Journal of nervous and mental disease*. 2005;193(12):843-6. Epub 2005/12/02.
5. Kalman D, Morissette SB, George TP. Co-morbidity of smoking in patients with psychiatric and substance use disorders. *The American journal on addictions / American Academy of Psychiatrists in Alcoholism and Addictions*. 2005;14(2):106-23. Epub 2005/07/16.
6. Kelly PJ, Baker AL, Deane FP, Kay-Lambkin FJ, Bonevski B, Tregarthen J. Prevalence of smoking and other health risk factors in people attending residential substance abuse treatment. *Drug and alcohol review*. 2012;31(5):638-44. Epub 2012/05/31.
7. Moeller-Saxone K. Cigarette smoking and interest in quitting among consumers at a psychiatric disability rehabilitation and support service in Victoria. *Australian & New Zealand Journal of Public Health*. 2008;32(5):479-81.
8. Prochaska JJ. Failure to treat tobacco use in mental health and addiction treatment settings: a form of harm reduction? *Drug and alcohol dependence*. 2010;110(3):177-82. Epub 2010/04/10.
9. Prochaska JJ. Integrating tobacco treatment into mental health settings. *JAMA: Journal of the American Medical Association*. 2010;304(22):2534-5.
10. Reichler H, Baker A, Lewin T, Carr V. Smoking among in-patients with drug-related problems in an Australian psychiatric hospital. *Drug and alcohol review*. 2001;20(2):231-7.
11. Suplee PD. The importance of providing smoking relapse counseling during the postpartum hospitalization. *JOGNN: Journal of Obstetric, Gynecologic & Neonatal Nursing*. 2005;34(6):703-12.

1  
2  
3  
4  
5  
6  
7  
8  
9  
10  
11  
12  
13  
14  
15  
16  
17  
18  
19  
20  
21  
22  
23  
24  
25  
26  
27  
28  
29  
30  
31  
32  
33  
34  
35  
36  
37  
38  
39  
40  
41  
42  
43  
44  
45  
46  
47  
48  
49  
50  
51  
52  
53  
54  
55  
56  
57  
58  
59  
60

12. Wye PM, Bowman JA, Wiggers JH, Baker A, Knight J, Carr VJ, et al. Smoking restrictions and treatment for smoking: policies and procedures in psychiatric inpatient units in Australia. *Psychiatric services* (Washington, DC). 2009;60(1):100-7. Epub 2008/12/31.

*No discussion of barriers to smoking cessation (e.g. might be barriers to accessing health care in general)*

1. Carmody TP, McFall M, Saxon AJ, Malte CA, Chow B, Joseph AM, et al. Smoking outcome expectancies in military veteran smokers with posttraumatic stress disorder. *Nicotine & tobacco research : official journal of the Society for Research on Nicotine and Tobacco*. 2012;14(8):919-26. Epub 2012/01/25.

2. Carton S, Jouvent R, Widlocher D. Nicotine dependence and motives for smoking in depression. *Journal of substance abuse*. 1994;6(1):67-76.

3. Kelly DL, Raley HG, Lo S, Wright K, Liu F, McMahan RP, et al. Perception of smoking risks and motivation to quit among nontreatment-seeking smokers with and without schizophrenia. *Schizophrenia bulletin*. 2012;38(3):543-51. Epub 2010/11/03.

4. Thornton LK, Baker AL, Lewin TJ, Kay-Lambkin FJ, Kavanagh D, Richmond R, et al. Reasons for substance use among people with mental disorders. *Addictive behaviors*. 2012;37(4):427-34. Epub 2011/12/27.

5. Torchalla I, Okoli CT, Malchy L, Johnson JL. Nicotine dependence and gender differences in smokers accessing community mental health services. *Journal of psychiatric and mental health nursing*. 2011;18(4):349-58. Epub 2011/03/23.

*Not reporting the perceived self-reported barriers to smoking cessation (e.g. might report results of logistic regressions showing nicotine dependence associated with cessation success)*

1. Alvarado GF, Breslau N. Smoking and young people's mental health. *Current Opinion in Psychiatry*. 2005;18(4):397-400.

2. Anderson AE, Bowman JA, Knight J, Wye PM, Terry M, Grimshaw S, et al. Smoking cessation care provision and support procedures in Australian community mental health centers. *Psychiatric services* (Washington, DC). 2013;64(7):707-10. Epub 2013/07/04.

3. Apodaca TR, Abrantes AM, Strong DR, Ramsey SE, Brown RA. Readiness to change smoking behavior in adolescents with psychiatric disorders. *Addictive behaviors*. 2007;32(6):1119-30. Epub 2006/09/05.

4. Ashton M, Miller CL, Bowden JA, Bertossa S. People with mental illness can tackle tobacco. *Australian & New Zealand Journal of Psychiatry*. 2010;44(11):1021-8.

5. Blalock J, Robinson J, Wetter D, Cinciripini P. Relationship of DSM-IV-based depressive disorders to smoking cessation and smoking reduction in pregnant smokers. *American Journal on Addictions*. 2006;15(4):268-77.

6. Bonevski B, Bowman J, Richmond R, Bryant J, Wye P, Stockings E, et al. Turning of the tide: changing systems to address smoking for people with a mental illness. *Mental Health and Substance Use*. 2011;4(2):116-29.

7. Burgess ES, Brown RA, Kahler CW, Niaura R, Abrams DB, Goldstein MG, et al. Patterns of change in depressive symptoms during smoking cessation: who's at risk for relapse? *Journal of consulting and clinical psychology*. 2002;70(2):356-61. Epub 2002/04/16.

8. Compton MT, Daumit GL, Druss BG. Cigarette smoking and overweight/obesity among individuals with serious mental illnesses: a preventive perspective. *Harvard review of psychiatry*. 2006;14(4):212-22. Epub 2006/08/17.

- 1
  - 2
  - 3
  - 4
  - 5
  - 6
  - 7
  - 8
  - 9
  - 10
  - 11
  - 12
  - 13
  - 14
  - 15
  - 16
  - 17
  - 18
  - 19
  - 20
  - 21
  - 22
  - 23
  - 24
  - 25
  - 26
  - 27
  - 28
  - 29
  - 30
  - 31
  - 32
  - 33
  - 34
  - 35
  - 36
  - 37
  - 38
  - 39
  - 40
  - 41
  - 42
  - 43
  - 44
  - 45
  - 46
  - 47
  - 48
  - 49
  - 50
  - 51
  - 52
  - 53
  - 54
  - 55
  - 56
  - 57
  - 58
  - 59
  - 60
9. Cook JW, McFall MM, Calhoun PS, Beckham JC. Posttraumatic stress disorder and smoking relapse: A theoretical model. *Journal of traumatic stress*. 2007;20(6):989-98. Epub 2007/12/25.
10. Cosci F, Corlando A, Fornai E, Pistelli F, Paoletti P, Carrozzi L. Nicotine dependence, psychological distress and personality traits as possible predictors of smoking cessation. Results of a double-blind study with nicotine patch. *Addictive behaviors*. 2009;34(1):28-35.
11. Culhane MA, Schoenfeld DA, Barr RS, Cather C, Deckersbach T, Freudenreich O, et al. Predictors of early abstinence in smokers with schizophrenia. *Journal of Clinical Psychiatry*. 2008;69(11):1743-50.
12. Hall SM, Prochaska JJ. Treatment of smokers with co-occurring disorders: emphasis on integration in mental health and addiction treatment settings. *Annual review of clinical psychology*. 2009;5:409-31. Epub 2009/03/31.
13. Japuntich SJ, Smith SS, Jorenby DE, Piper ME, Fiore MC, Baker TB. Depression predicts smoking early but not late in a quit attempt. *Nicotine & Tobacco Research*. 2007;9(6):677-86.
14. Killen JD, Fortmann SP, Kraemer HC, Varady AN, Davis L, Newman B. Interactive effects of depression symptoms, nicotine dependence, and weight change on late smoking relapse. *Journal of Consulting & Clinical Psychology*. 1996;64(5):1060-7.
15. Lan T-H, Chiu H-J, Wu B-J, Hung T-H, Hu T-M. Readiness to quit and smoking reduction outcomes. *American Journal of Psychiatry*. 2007;164(5):827-8; author reply 8.
16. Levine MD, Marcus MD, Kalarchian MA, Houck PR, Cheng Y. Weight concerns, mood, and postpartum smoking relapse. *American Journal of Preventive Medicine*. 2010;39(4):345-51.
17. Levine MD, Marcus MD, Kalarchian MA, Weissfeld L, Qin L. Weight concerns affect motivation to remain abstinent from smoking postpartum. *Annals of Behavioral Medicine*. 2006;32(2):147-53.
18. McGee R, Williams S, Stanton W. Is mental health in childhood a major predictor of smoking in adolescence? *Addiction (Abingdon, England)*. 1998;93(12):1869-74. Epub 1999/02/02.
19. Mezuk B, Rafferty JA, Kershaw KN, Hudson D, Abdou CM, Lee H, et al. Reconsidering the role of social disadvantage in physical and mental health: stressful life events, health behaviors, race, and depression. *American journal of epidemiology*. 2010;172(11):1238-49. Epub 2010/10/05.
20. Minami H, McCarthy DE, Jorenby DE, Baker TB. An ecological momentary assessment analysis of relations among coping, affect and smoking during a quit attempt. *Addiction (Abingdon, England)*. 2011;106(3):641-50.
21. Morris CD, May MG, Devine K, Smith S, DeHay T, Mahalik J. Multiple perspectives on tobacco use among youth with mental health disorders and addictions. *American journal of health promotion : AJHP*. 2011;25(5 Suppl):S31-7. Epub 2011/04/29.
22. Mullane JC, Stewart SH, Rhyno E, Steeves D, Watt M, Eisner A. Anxiety, sensitivity and difficulties with smoking cessation. *Columbus, Alexandra M [Ed]*. 2008;54:141-55.
23. Olivier D, Lubman DI, Fraser R. Tobacco smoking within psychiatric inpatient settings: biopsychosocial perspective. *Australian & New Zealand Journal of Psychiatry*. 2007;41(7):572-80.
24. Palm KM, Abrantes AM, Strong DR, Ramsey SE, Brown RA. Smoking Characteristics of Adolescent Smokers With Post-traumatic Stress Disorder in a Psychiatric Inpatient Setting. *Journal of Dual Diagnosis*. 2009;5(1):14-29.
25. Piper ME, Cook JW, Schlam TR, Jorenby DE, Baker TB. Anxiety diagnoses in smokers seeking cessation treatment: relations with tobacco dependence, withdrawal, outcome and response to treatment. *Addiction (Abingdon, England)*. 2011;106(2):418-27.
26. Prochaska JJ, Rossi JS, Redding CA, Rosen AB, Tsoh JY, Humfleet GL, et al. Depressed smokers and stage of change: implications for treatment interventions. *Drug & Alcohol Dependence*. 2004;76(2):143-51.
27. Reid MS, Jiang H, Fallon B, Sonne S, Rinaldi P, Turrigiano E, et al. Smoking cessation treatment among patients in community-based substance abuse rehabilitation programs: exploring predictors of outcome as clues toward treatment improvement. *The American journal of drug and alcohol abuse*. 2011;37(5):472-8. Epub 2011/08/23.

- 1
  - 2
  - 3
  - 4
  - 5
  - 6
  - 7
  - 8
  - 9
  - 10
  - 11
  - 12
  - 13
  - 14
  - 15
  - 16
  - 17
  - 18
  - 19
  - 20
  - 21
  - 22
  - 23
  - 24
  - 25
  - 26
  - 27
  - 28
  - 29
  - 30
  - 31
  - 32
  - 33
  - 34
  - 35
  - 36
  - 37
  - 38
  - 39
  - 40
  - 41
  - 42
  - 43
  - 44
  - 45
  - 46
  - 47
  - 48
  - 49
  - 50
  - 51
  - 52
  - 53
  - 54
  - 55
  - 56
  - 57
  - 58
  - 59
  - 60
28. Reilly P, Murphy L, Alderton D. Challenging the smoking culture within a mental health service supportively. *International Journal of Mental Health Nursing*. 2006;15(4):272-8.
29. Richards CS, Cohen LM, Morrell HE, Watson NL, Low BE. Treating depressed and anxious smokers in smoking cessation programs. *Journal of consulting and clinical psychology*. 2013;81(2):263-73. Epub 2012/03/21.
30. Selby P, Voci SC, Zawertailo LA, George TP, Brands B. Individualized smoking cessation treatment in an outpatient setting: Predictors of outcome in a sample with psychiatric and addictions co-morbidity. *Addictive behaviors*. 2010;35(9):811-7.
31. Stein MD, Anderson BJ, Niaura R. Smoking cessation patterns in methadone-maintained smokers. *Nicotine and Tobacco Research*. 2007;9(3):421-8.
32. Swan GE, Jack LM, Curry S, Chorost M, Javitz H, McAfee T, et al. Bupropion SR and counseling for smoking cessation in actual practice: Predictors of outcome. *Nicotine and Tobacco Research*. 2003;5(6):911-21.

#### *Population level study*

1. John U, Meyer C, Rumpf HJ, Hapke U. Smoking, nicotine dependence and psychiatric comorbidity--a population-based study including smoking cessation after three years. *Drug and alcohol dependence*. 2004;76(3):287-95. Epub 2004/11/25.

#### *Reviews (reviews conducted on smoking within the defined disadvantaged group but not reporting on perceived barriers to smoking cessation)*

1. Ameringer KJ, Leventhal AM. Applying the tripartite model of anxiety and depression to cigarette smoking: an integrative review. *Nicotine & tobacco research : official journal of the Society for Research on Nicotine and Tobacco*. 2010;12(12):1183-94. Epub 2010/11/03.
2. Arfken CL. E. A review: Depression and smoking. *Ethnicity and Disease*. 2007;17(SUPPL. 3):S3-16-S3-8.
3. Aubin HJ, Rollema H, Svensson TH, Winterer G. Smoking, quitting, and psychiatric disease: a review. *Neuroscience and biobehavioral reviews*. 2012;36(1):271-84. Epub 2011/07/05.
4. Banham L, Gilbody S. Smoking cessation in severe mental illness: what works? *Addiction (Abingdon, England)*. 2010;105(7):1176-89.
5. el-Guebaly N, Cathcart J, Currie S, Brown D, Gloster S. Smoking cessation approaches for persons with mental illness or addictive disorders. *Psychiatric Services*. 2002;53(9):1166-70.
6. Fagerström K, Aubin H. Management of smoking cessation in patients with psychiatric disorders. *Current Medical Research & Opinion*. 2009;25(2):511-8.
7. Fu SS, McFall M, Saxon AJ, Beckham JC, Carmody TP, Baker DG, et al. Post-traumatic stress disorder and smoking: A systematic review. *Nicotine and Tobacco Research*. 2007;9(11):1071-84.
8. Goldberg JO. Successful change in tobacco use in schizophrenia. *Journal of the American Psychiatric Nurses Association*. 2010;16(1):30-5. Epub 2010/01/01.
9. Gyuish J, Passalacqua E, Tajima B, Manser ST. Staff smoking and other barriers to nicotine dependence intervention in addiction treatment settings: a review. *Journal of psychoactive drugs*. 2007;39(4):423-33. Epub 2008/02/29.
10. Hitsman B, Borrelli B, McChargue DE, Spring B, Niaura R. History of depression and smoking cessation outcome: a meta-analysis. *Journal of consulting and clinical psychology*. 2003;71(4):657-63. Epub 2003/08/20.
11. Ischaki E, Gratiou C. Smoking and depression: Is smoking cessation effective? *Therapeutic advances in respiratory disease*. 2009;3(1):31-8.

12. Mathers M, Toumbourou JW, Catalano RF, Williams J, Patton GC. Consequences of youth tobacco use: a review of prospective behavioural studies. *Addiction* (Abingdon, England). 2006;101(7):948-58.
13. Mills EJ, Wu P, Lockhart I, Wilson K, Ebbert JO. Adverse events associated with nicotine replacement therapy (NRT) for smoking cessation. A systematic review and meta-analysis of one hundred and twenty studies involving 177,390 individuals. *Tobacco Induced Diseases*. 2010;8:15p.
14. Mookadam F, Arthur HM. Social support and its relationship to morbidity and mortality after acute myocardial infarction: Systematic overview. *Archives of Internal Medicine*. 2004;164(14):1514-8.
15. Rasmussen AM, Picciotto MR, Krishnan-Sarin S. Smoking as a complex but critical covariate in neurobiological studies of posttraumatic stress disorders: A review. *Journal of Psychopharmacology*. 2006;20(5):693-707.
16. Schroeder SA, Morris CD. Confronting a neglected epidemic: tobacco cessation for persons with mental illnesses and substance abuse problems. *Annual review of public health*. 2010;31:297-314 1p following Epub 2009/12/17.
17. Sharp DL, Blaakman SW. A review of research by nurses regarding tobacco dependence and mental health. *Annual review of nursing research*. 2009;27:297-318.
18. Shirani A, Tremlett H. The effect of smoking on the symptoms and progression of multiple sclerosis: A review. *Journal of Inflammation Research*. 2010;3(1):115-26.
19. Silvani P, Camporesi A. Drug-induced pulmonary hypertension in newborns: A review. *Current Vascular Pharmacology*. 2007;5(2):129-33.
20. Siru R, Hulse GK, Tait RJ. Assessing motivation to quit smoking in people with mental illness: a review. *Addiction* (Abingdon, England). 2009;104(5):719-33. Epub 2009/05/06.
21. Small G, Dubois B. A review of compliance to treatment in Alzheimer's disease: Potential benefits of a transdermal patch. *Current medical research and opinion*. 2007;23(11):2705-13.
22. Torchalla I, Nosen L, Rostam H, Allen P. Integrated treatment programs for individuals with concurrent substance use disorders and trauma experiences: a systematic review and meta-analysis. *Journal of substance abuse treatment*. 2012;42(1):65-77. Epub 2011/11/01.
23. Ziedonis D, Montoya ID. Tobacco Dependence Amongst Individuals with Schizophrenia: A Public Health Crisis and an Opportunity for Bidirectional Translational Research. *Journal of Dual Diagnosis*. 2007;3(3-4):3-7.

#### *Studies not meeting the subgroup definition*

1. Allen SS, Hatsukami DK, Christianson D. Nicotine withdrawal and depressive symptomatology during short-term smoking abstinence: A comparison of postmenopausal women using and not using hormone replacement therapy. *Nicotine and Tobacco Research*. 2003;5(1):49-59.
2. Baker A, Ivers RG, Bowman J, Butler T, Kay-Lambkin FJ, Wye P, et al. Where there's smoke, there's fire: high prevalence of smoking among some sub-populations and recommendations for intervention. *Drug and alcohol review*. 2006;25(1):85-96. Epub 2006/02/24.
3. Gehricke JG, Loughlin SE, Whalen CK, Potkin SG, Fallon JH, Jamner LD, et al. Smoking to self-medicate attentional and emotional dysfunctions. *Nicotine & tobacco research : official journal of the Society for Research on Nicotine and Tobacco*. 2007;9 Suppl 4:S523-36. Epub 2008/08/30.
4. Gierisch JM, Straits-Troster K, Calhoun PS, Beckham JC, Acheson S, Hamlett-Berry K. Tobacco use among Iraq- and Afghanistan-era veterans: a qualitative study of barriers, facilitators, and treatment preferences. *Preventing chronic disease*. 2012;9:E58. Epub 2012/02/18.
5. Gonzalez A, Zvolensky MJ, Vujanovic AA, Leyro TM, Marshall EC. An evaluation of anxiety sensitivity, emotional dysregulation, and negative affectivity among daily cigarette smokers: relation to smoking motives and barriers to quitting. *Journal of psychiatric research*. 2008;43(2):138-47. Epub 2008/04/18.



6. Kraemer KM, McLeish AC, Jeffries ER, Avallone KM, Luberto CM. Distress tolerance and perceived barriers to smoking cessation. *Substance abuse : official publication of the Association for Medical Education and Research in Substance Abuse*. 2013;34(3):277-82. Epub 2013/07/13.
7. Lawn S. Australians with mental illness who smoke. *The British journal of psychiatry : the journal of mental science*. 2001;178(1):85. Epub 2001/01/03.
8. McNeill A, Amos A, McEwen A, Ferguson J, Croghan E. Developing the evidence base for addressing inequalities and smoking in the United Kingdom. *Addiction (Abingdon, England)*. 2012;107 Suppl 2:1-7. Epub 2012/11/21.
9. Moss TG, Weinberger AH, Vessicchio JC, Mancuso V, Cushing SJ, Pett M, et al. A tobacco reconceptualization in psychiatry: toward the development of tobacco-free psychiatric facilities. *American Journal on Addictions*. 2010;19(4):293-311.
10. Nichols L, Martindale-Adams J, Burns R, Coon D, Ory M, Mahoney D, et al. Social marketing as a framework for recruitment: illustrations from the REACH study. *Journal of aging and health*. 2004;16(5 Suppl):157S-76S. Epub 2004/09/28.
11. Prochaska JJ, Sorensen JL, Hall SM, Rossi JS, Redding CA, Rosen AB, et al. Predictors of health functioning in two high-risk groups of smokers. *Drug & Alcohol Dependence*. 2005;78(2):169-75.
12. Shirley DK, Kesari RK, Glesby MJ. Factors associated with smoking in HIV-infected patients and potential barriers to cessation. *AIDS patient care and STDs*. 2013;27(11):604-12. Epub 2013/10/22.
13. Wye P, Bowman J, Wiggers J, Baker A, Knight J, Carr V, et al. Total smoking bans in psychiatric inpatient services: a survey of perceived benefits, barriers and support among staff. *BMC public health*. 2010;10:372. Epub 2010/06/26.

### **Homeless studies (n = 38)**

#### *Intervention studies*

1. Businelle MS, Kendzor DE, Kesh A, Cuate EL, Poonawalla IB, Reitzel LR, et al. Small financial incentives increase smoking cessation in homeless smokers: a pilot study. *Addict Behav*. 2014;39(3):717-20. Epub 2013/12/11.
2. Goldade K, Whembolua GL, Thomas J, Eischen S, Guo H, Connett J, et al. Designing a smoking cessation intervention for the unique needs of homeless persons: a community-based randomized clinical trial. *Clinical trials (London, England)*. 2011;8(6):744-54. Epub 2011/12/15.
3. Monso E, Campbell J, Tonnesen P, Gustavsson G, Morera J. Sociodemographic predictors of success in smoking intervention. *Tobacco control*. 2001;10(2):165-9.
4. Okuyemi KS, Goldade K, Whembolua GL, Thomas JL, Eischen S, Guo H, et al. Smoking characteristics and comorbidities in the power to quit randomized clinical trial for homeless smokers. *Nicotine & tobacco research : official journal of the Society for Research on Nicotine and Tobacco*. 2013;15(1):22-8. Epub 2012/05/17.
5. Okuyemi KS, Thomas JL, Hall S, Nollen NL, Richter KP, Jeffries SK, et al. Smoking cessation in homeless populations: a pilot clinical trial. *Nicotine & tobacco research : official journal of the Society for Research on Nicotine and Tobacco*. 2006;8(5):689-99. Epub 2006/09/30.
6. Shelley D, Cantrell J, Wong S, Warn D. Smoking cessation among sheltered homeless: a pilot. *American journal of health behavior*. 2010;34(5):544-52. Epub 2010/06/09.

#### *No discussion of barriers*

1. Torchalla I, Strehlau V, Okoli CT, Li K, Schuetz C, Krausz M. Smoking and predictors of nicotine dependence in a homeless population. *Nicotine & tobacco research : official journal of the Society for Research on Nicotine and Tobacco*. 2011;13(10):934-42. Epub 2011/05/31.

1  
2  
3  
4  
5  
6  
7  
8  
9  
10  
11  
12  
13  
14  
15  
16  
17  
18  
19  
20  
21  
22  
23  
24  
25  
26  
27  
28  
29  
30  
31  
32  
33  
34  
35  
36  
37  
38  
39  
40  
41  
42  
43  
44  
45  
46  
47  
48  
49  
50  
51  
52  
53  
54  
55  
56  
57  
58  
59  
60

*No discussion of barriers to smoking cessation (e.g. might be barriers to accessing health care in general)*

1. Aloot CB, Vredevoe DL, Brecht ML. Evaluation of high-risk smoking practices used by the homeless. *Cancer nursing*. 1993;16(2):123-30. Epub 1993/04/01.
2. Baggett TP, O'Connell JJ, Singer DE, Rigotti NA. The unmet health care needs of homeless adults: a national study. *American journal of public health*. 2010;100(7):1326-33. Epub 2010/05/15.
3. Baggett TP, Rigotti NA. Cigarette smoking and advice to quit in a national sample of homeless adults. *American journal of preventive medicine*. 2010;39(2):164-72. Epub 2010/07/14.
4. Butler J, Okuyemi KS, Jean S, Nazir N, Ahluwalia JS, Resnicow K. Smoking characteristics of a homeless population. *Substance abuse : official publication of the Association for Medical Education and Research in Substance Abuse*. 2002;23(4):223-31. Epub 2002/11/20.
5. Gelberg L, Andersen RM, Leake BD. The Behavioral Model for Vulnerable Populations: application to medical care use and outcomes for homeless people. *Health services research*. 2000;34(6):1273-302. Epub 2000/02/02.
6. Gelberg L, Gallagher TC, Andersen RM, Koegel P. Competing priorities as a barrier to medical care among homeless adults in Los Angeles. *American journal of public health*. 1997;87(2):217-20. Epub 1997/02/01.
7. Heffron WA, Skipper BJ, Lambert L. Health and lifestyle issues as risk factors for homelessness. *The Journal of the American Board of Family Practice / American Board of Family Practice*. 1997;10(1):6-12.
8. Kushel MB, Vittinghoff E, Haas JS. Factors associated with the health care utilization of homeless persons. *JAMA : the journal of the American Medical Association*. 2001;285(2):200-6. Epub 2001/02/15.
9. Malloy C, Christ MA, Hohloch FJ. The homeless: social isolates. *Journal of community health nursing*. 1990;7(1):25-36. Epub 1990/01/01.
10. McGuire J, Rosenheck R. The quality of preventive medical care for homeless veterans with mental illness. *Journal for Healthcare Quality: Promoting Excellence in Healthcare*. 2005;27(6):26-32.
11. Ober K, Carlson L, Anderson P. Cardiovascular risk factors in homeless adults. *The Journal of cardiovascular nursing*. 1997;11(4):50-9. Epub 1997/07/01.
12. O'Toole TP, Gibbon JL, Hanusa BH, Fine MJ. Utilization of health care services among subgroups of urban homeless and housed poor. *Journal of health politics, policy and law*. 1999;24(1):91-114. Epub 1999/05/26.
13. Padgett D, Struening EL, Andrews H. Factors affecting the use of medical, mental health, alcohol, and drug treatment services by homeless adults. *Medical care*. 1990;28(9):805-21. Epub 1990/09/01.
14. Robertson MJ, Cousineau MR. Health status and access to health services among the urban homeless. *American journal of public health*. 1986;76(5):561-3. Epub 1986/05/01.
15. Thompson SJ. Risk/protective factors associated with substance use among runaway/homeless youth utilizing emergency shelter services nationwide. *Substance Abuse*. 2004;25(3):13-26.
16. Thompson SJ, Zittell-Palamara KM, Forehand G. Risk factors for cigarette, alcohol, and marijuana use among runaway youth utilizing two services sectors. *Journal of Child & Adolescent Substance Abuse*. 2005;15(1):17-36.
17. Wojtusik L, White MC. Health status, needs, and health care barriers among the homeless. *Journal of health care for the poor and underserved*. 1998;9(2):140-52. Epub 1999/03/12.

*Not reporting the perceived self-reported barriers to smoking cessation (e.g. might report results of logistic regressions showing nicotine dependence associated with cessation success)*

1. Baggett TP, Anderson R, Freyder PJ, Jarvie JA, Maryman K, Porter J, et al. Addressing tobacco use in homeless populations: a survey of health care professionals. *Journal of health care for the poor and underserved*. 2012;23(4):1650-9. Epub 2012/01/01.
2. Baggett TP, Lebrun-Harris LA, Rigotti NA. Homelessness, cigarette smoking and desire to quit: results from a US national study. *Addiction (Abingdon, England)*. 2013;108(11):2009-18. Epub 2013/07/10.
3. Bassuk EL, Buckner JC, Perloff JN, Bassuk SS. Prevalence of mental health and substance use disorders among homeless and low-income housed mothers. *The American journal of psychiatry*. 1998;155(11):1561-4. Epub 1998/11/13.
4. Diaz T, Dusenbury L, Botvin GJ, Farmer-Huselid R. Factors associated with drug use among youth living in homeless shelters. *Journal of Child & Adolescent Substance Abuse*. 1997;6(1):91-110.
5. Greene JM, Ennett ST, Ringwalt CL. Substance use among runaway and homeless youth in three national samples. *American journal of public health*. 1997;87(2):229-35.
6. Kim DH, Daskalakis C, Plumb JD, Adams S, Brawer R, Orr N, et al. Modifiable cardiovascular risk factors among individuals in low socioeconomic communities and homeless shelters. *Family & community health*. 2008;31(4):269-80. Epub 2008/09/17.
7. Lee TC, Hanlon JG, Ben-David J, Booth GL, Cantor WJ, Connelly PW, et al. Risk factors for cardiovascular disease in homeless adults. *Circulation*. 2005;111(20):2629-35.
8. Thompson RG, Hasin DS. Cigarette, marijuana, and alcohol use and prior drug treatment among newly homeless young adults in New York City: Relationship to a history of foster care. *Drug and alcohol dependence*. 2011;117(1):66-9. Epub 2011/02/04.

*Reviews (reviews conducted on smoking within the defined disadvantaged group but not reporting on perceived barriers to smoking cessation)*

1. Baggett TP, Tobey ML, Rigotti NA. Tobacco use among homeless people--addressing the neglected addiction. *The New England journal of medicine*. 2013;369(3):201-4. Epub 2013/07/19.
2. Fazel S, Khosla V, Doll H, Geddes J. The prevalence of mental disorders among the homeless in western countries: systematic review and meta-regression analysis. *PLoS medicine*. 2008;5(12):e225. Epub 2008/12/05.
3. Hwang SW, Tolomiczenko G, Kouyoumdjian FG, Garner RE. Interventions to improve the health of the homeless: a systematic review. *American journal of preventive medicine*. 2005;29(4):311-9. Epub 2005/10/26.

*Studies not meeting the subgroup definition*

1. Cousineau MR. Health status of and access to health services by residents of urban encampments in Los Angeles. *Journal of health care for the poor and underserved*. 1997;8(1):70-82. Epub 1997/02/01.
2. Epstein JA, Williams C, Botvin GJ, Diaz T, Ifill-Williams M. Psychosocial predictors of cigarette smoking among adolescents living in public housing developments. *Tobacco control*. 1999;8(1):45-52.
3. Kruger TM, Howell BM, Haney A, Davis RE, Fields N, Schoenberg NE. Perceptions of smoking cessation programs in rural Appalachia. *American journal of health behavior*. 2012;36(3):373-84. Epub 2012/03/01.

## Prisoner studies (n = 22)

### *Intervention studies*

1. Berg CJ, Ahluwalia JS, Cropsey K. Predictors of adherence to behavioral counseling and medication among female prisoners enrolled in a smoking cessation trial. *Journal of correctional health care : the official journal of the National Commission on Correctional Health Care.* 2013;19(4):236-47. Epub 2013/08/21.
2. Cropsey K, Eldridge G, Weaver M, Villalobos G, Stitzer M, Best A. Smoking cessation intervention for female prisoners: addressing an urgent public health need. *American journal of public health.* 2008;98(10):1894-901.
3. Cropsey KL, Jackson DO, Hale GJ, Carpenter MJ, Stitzer ML. Impact of self-initiated pre-quit smoking reduction on cessation rates: results of a clinical trial of smoking cessation among female prisoners. *Addictive behaviors.* 2011;36(1-2):73-8. Epub 2010/10/05.
4. Cropsey KL, McClure LA, Jackson DO, Villalobos GC, Weaver MF, Stitzer ML. The impact of quitting smoking on weight among women prisoners participating in a smoking cessation intervention. *American journal of public health.* 2010;100(8):1442-8.
5. Khavjou OA, Clarke J, Hofeldt RM, Lihs P, Loo RK, Prabhu M, et al. A Captive Audience. Bringing the WISEWOMAN Program to South Dakota Prisoners. *Women's Health Issues.* 2007;17(4):193-201.

### *No discussion of barriers*

1. Foley KL, Proescholdbell S, Herndon Malek S, Johnson J. Implementation and enforcement of tobacco bans in two prisons in North Carolina: a qualitative inquiry. *Journal of correctional health care : the official journal of the National Commission on Correctional Health Care.* 2010;16(2):98-105. Epub 2010/03/27.
2. Kauffman RM, Ferketich AK, Murray DM, Bellair PE, Wewers ME. Measuring tobacco use in a prison population. *Nicotine & Tobacco Research.* 2010;12(6):582-8.
3. Kauffman RM, Ferketich AK, Wewers ME. Tobacco policy in American prisons, 2007. *Tobacco control.* 2008;17(5):357-60.

### *Not reporting the perceived self-reported barriers to smoking cessation (e.g. might report results of logistic regressions showing nicotine dependence associated with cessation success)*

1. Belcher JM, Butler T, Richmond RL, Wodak AD, Wilhelm K. Smoking and its correlates in an Australian prisoner population. *Drug and Alcohol Review.* 2006;25(4):343-8.
2. Cropsey K, Eldridge GD, Ladner T. Smoking among female prisoners: an ignored public health epidemic. *Addictive behaviors.* 2004;29(2):425-31. Epub 2004/01/21.
3. Cropsey KL, Linker JA, Waite DE. An analysis of racial and sex differences for smoking among adolescents in a juvenile correctional center. *Drug & Alcohol Dependence.* 2008;92(1-3):156-63.
4. Durrah TL. Correlates of daily smoking among female arrestees in New York City and Los Angeles, 1997. *American journal of public health.* 2005;95(10):1788-92.
5. El-Guebaly N, Cathcart J, Currie S, Brown D, Gloster S. Public health and therapeutic aspects of smoking bans in mental health and addiction settings. *Psychiatric services (Washington, DC).* 2002;53(12):1617-22. Epub 2002/12/04.
6. Lekka NP, Lee KH, Argyriou AA, Beratis S, Parks RW. Association of cigarette smoking and depressive symptoms in a forensic population. *Depression and Anxiety.* 2007;24(5):325-30.

7. Lincoln T, Tuthill RW, Roberts CA, Kennedy S, Hammett TM, Langmore-Avila E, et al. Resumption of smoking after release from a tobacco-free correctional facility. *Journal of Correctional Health Care*. 2009;15(3):190-6.
8. Makris E, Gourgoulis KI, Hatzoglou C. Prisoners and cigarettes or 'imprisoned in cigarettes'? What helps prisoners quit smoking? *BMC public health*. 2012;12:508. Epub 2012/07/10.
9. Nijhawan AE, Salloway R, Nunn AS, Poshkus M, Clarke JG. Preventive healthcare for underserved women: results of a prison survey. *Journal of women's health (2002)*. 2010;19(1):17-22. Epub 2010/01/22.
10. Ramaswamy M, Faseru B, Cropsey KL, Jones M, Deculus K, Freudenberg N. Factors associated with smoking among adolescent males prior to incarceration and after release from jail: a longitudinal study. *Substance abuse treatment, prevention, and policy*. 2013;8(1):37. Epub 2013/11/02.
11. Richmond RL, Wilhelm KA, Indig D, Butler TG, Archer VA, Wodak AD. Cardiovascular risk among Aboriginal and non-Aboriginal smoking male prisoners: inequalities compared to the wider community. *BMC public health*. 2011;11:783. Epub 2011/10/12.
12. Thibodeau L, Jorenby DE, Seal DW, Kim SY, Sosman JM. Prerelease intent predicts smoking behavior postrelease following a prison smoking ban. *Nicotine and Tobacco Research*. 2010;12(2):152-8.

*Reviews (reviews conducted on smoking within the defined disadvantaged group but not reporting on perceived barriers to smoking cessation)*

1. Donahue JJ. Tobacco Smoking Among Incarcerated Individuals: A Review of the Nature of the Problem and What is Being Done in Response. *Journal of Offender Rehabilitation*. 2009;48(7):589-604.

*Studies not meeting the subgroup definition*

1. Dickens GL, Stubbs JH, Haw CM. Smoking and mental health nurses: a survey of clinical staff in a psychiatric hospital. *Journal of psychiatric and mental health nursing*. 2004;11(4):445-51. Epub 2004/07/17.

#### **At risk youth studies (n = 48)**

*Intervention studies*

1. Horn K, Dino G, Kalsekar I, Massey CJ, Manzo-Tennant K, McGloin T. Exploring the relationship between mental health and smoking cessation: a study of rural teens. *Prevention science : the official journal of the Society for Prevention Research*. 2004;5(2):113-26. Epub 2004/05/12.
2. Kelly AB. Predictors of response to brief smoking cessation interventions for adolescents who have contravened school smoking policy. *Journal of Substance Use*. 2008;13(4):219-24.

*No discussion of barriers*

1. Akers RL, Lee G. A longitudinal test of social learning theory: Adolescent smoking. *Journal of Drug Issues*. 1996;26(2):317-43.

- 1  
2  
3 2. Hanson MJ. The theory of planned behavior applied to cigarette smoking in African-  
4 American, Puerto Rican, and non-Hispanic white teenage females. *Nursing research*. 1997;46(3):155-  
5 62.  
6  
7

8  
9 *No discussion of barriers to smoking cessation (e.g. might be barriers to accessing health care in*  
10 *general)*  
11

- 12 1. Diaz T, Dusenbury L, Botvin GJ, Farmer-Huselid R. Factors associated with drug use among  
13 youth living in homeless shelters. *Journal of Child & Adolescent Substance Abuse*. 1997;6(1):91-110.  
14 2. Donaghy E, Bauld L, Eadie D, McKell J, Pringle B, Amos A. A qualitative study of how young  
15 Scottish smokers living in disadvantaged communities get their cigarettes. *Nicotine & tobacco*  
16 *research : official journal of the Society for Research on Nicotine and Tobacco*. 2013;15(12):2053-9.  
17 Epub 2013/08/06.  
18 3. Hansen WB, Collins LM, Johnson CA, Graham JW. Self-initiated smoking cessation among  
19 high school students. *Addictive Behaviors*. 1985;10(3):265-71.  
20 4. Lipperman-Kreda S, Paschall MJ, Grube JW. Perceived enforcement of school tobacco policy  
21 and adolescents' cigarette smoking. *Preventive Medicine*. 2009;48(6):562-6.  
22  
23  
24  
25

26 *Not carried out in high income country/not published in English*  
27

- 28 1. Malhotra C, Sharma N, Saxena R, Ingle GK. Drug use among juveniles in conflict with the law.  
29 *Indian Journal of Pediatrics*. 2007;74(4):353-6.  
30 2. Manolova A. Adolescent smoking and social environment. *Archives of the Balkan Medical*  
31 *Union*. 2005;40(1):7-11.  
32 3. Ng N, Weinehall L, Ohman A. 'If I don't smoke, I'm not a real man' Indonesian teenage boys'  
33 views about smoking. *Health education research*. 2007;22(6):794-804.  
34  
35  
36  
37

38 *Not reporting the perceived self-reported barriers to smoking cessation (e.g. might report results of*  
39 *logistic regressions showing nicotine dependence associated with cessation success)*  
40  
41

- 42 1. Bean MK, Mitchell KS, Speizer IS, Wilson DB, Smith BN, Fries EA. Rural adolescent attitudes  
43 toward smoking and weight loss: relationship to smoking status. *Nicotine & tobacco research :*  
44 *official journal of the Society for Research on Nicotine and Tobacco*. 2008;10(2):279-86. Epub  
45 2008/02/01.  
46 2. Beebe LA, Vesely SK, Oman RF, Tolma E, Aspy CB, Rodine S. Protective assets for non-use of  
47 alcohol, tobacco and other drugs among urban American Indian youth in Oklahoma. *Maternal and*  
48 *child health journal*. 2008;12(SUPPL. 1):S82-S90.  
49 3. Belgrave FZ, Johnson J, Nguyen A, Hood K, Tademy R, Clark T, et al. Stress and tobacco use  
50 among African-American adolescents: the buffering effect of cultural factors. *Journal of Drug*  
51 *Education*. 2010;40(2):173-88.  
52 4. Booker CL, Gallaher P, Unger JB, Ritt-Olson A, Johnson CA. Stressful life events, smoking  
53 behavior, and intentions to smoke among and multiethnic sample of sixth graders. *Ethnicity &*  
54 *health*. 2004;9(4):369-97.  
55 5. Colgan Y, Turnbull DA, Mikocka-Walus AA, Delfabbro P. Determinants of resilience to  
56 cigarette smoking among young Australians at risk: An exploratory study. *Tobacco Induced Diseases*.  
57 2010;8(1).  
58  
59  
60

6. Conwell LS, O'Callaghan MJ, Andersen MJ, Bor W, Najman JM, Williams GM. Early adolescent smoking and a web of personal and social disadvantage. *Journal of Paediatrics & Child Health*. 2003;39(8):580-5.
7. Dozois DN, Farrow JA, Miser A. Smoking patterns and cessation motivations during adolescence. *The International journal of the Addictions*. 1995;30(11):1485-98. Epub 1995/09/01.
8. Fettes DL, Aarons GA. Smoking behavior of US youths: a comparison between child welfare system and community populations. *American journal of public health*. 2011;101(12):2342-8.
9. Flynn BS, Worden JK, Secker-Walker RH, Pirie PL, Badger GJ, Carpenter JH. Long-term responses of higher and lower risk youths to smoking prevention interventions. *Preventive Medicine*. 1997;26(3):389-94.
10. Frohlich KL, Mykhalovskiy E, Poland BD, Haines-Saah R, Johnson J. Creating the socially marginalised youth smoker: the role of tobacco control. *Sociology of health & illness*. 2012;34(7):978-93. Epub 2012/03/06.
11. Glanz K, Mau M, Steffen A, Maskarinec G, Arriola KJ. Tobacco use among Native Hawaiian middle school students: Its prevalence, correlates and implications. *Ethnicity and Health*. 2007;12(3):227-44.
12. Hansen WB. Behavioral predictors of abstinence: early indicators of a dependence on tobacco among adolescents. *International Journal of the Addictions*. 1983;18(7):913-20.
13. Hanson MJ. An examination of ethnic differences in cigarette smoking intention among female teenagers. *Journal of the American Academy of Nurse Practitioners*. 2005;17(4):149-55.
14. Hanson MJS. African-American adolescents' intentions to smoke cigarettes: an application of the Theory of Planned Behavior. *Journal of Gender, Culture, & Health*. 1996;1(2):125-34.
15. Indig D, Haysom L. Smoking behaviours among young people in custody in New South Wales, Australia. *Drug and alcohol review*. 2012;31(5):631-7. Epub 2012/03/08.
16. Karcher MJ, Finn L. How connectedness contributes to experimental smoking among rural youth: developmental and ecological analyses. *Journal of Primary Prevention*. 2005;26(1):25-36.
17. Kerby DS, Brand MW, John R. Anger types and the use of cigarettes and smokeless tobacco among Native American adolescents. *Preventive Medicine*. 2003;37(5):485-91.
18. Leff MK, Moolchan ET, Cookus BA, Spurgeon L, Evans LA, London ED, et al. Predictors of smoking initiation among at risk youth: A controlled study. *Journal of Child & Adolescent Substance Abuse*. 2003;13(1):59-76.
19. LeMaster PL, Connell CM, Mitchell CM, Manson SM. Tobacco use among American Indian adolescents: protective and risk factors. *Journal of Adolescent Health*. 2002;30(6):426-32.
20. Ramsey SE, Brown RA, Strong DR, Sales SD. Cigarette smoking among adolescent psychiatric inpatients: Prevalence and correlates. *Annals of Clinical Psychiatry*. 2002;14(3):149-53.
21. Yu M, Stiffman AR, Freedenthal S. Factors affecting American Indian adolescent tobacco use. *Addictive Behaviors*. 2005;30(5):889-904.

*Reviews (reviews conducted on smoking within the defined disadvantaged group but not reporting on perceived barriers to smoking cessation)*

1. Cengelli S, O'Loughlin J, Lauzon B, Cornuz J. A systematic review of longitudinal population-based studies on the predictors of smoking cessation in adolescent and young adult smokers. *Tobacco control*. 2012;21(3):355-62. Epub 2011/08/19.
2. Johnston V, Westphal DW, Glover M, Thomas DP, Segan C, Walker N. Reducing smoking among indigenous populations: new evidence from a review of trials. *Nicotine & tobacco research : official journal of the Society for Research on Nicotine and Tobacco*. 2013;15(8):1329-38. Epub 2013/03/23.

*Studies not meeting the subgroup definition*

1. Abernathy TJ, Bertrand LD. The prevalence of smokeless tobacco and cigarette use among sixth, seventh and eighth grade students: a longitudinal investigation. *Canadian Journal of Public Health*. 1992;83(1):15-8.
2. Audrain-McGovern J, Rodriguez D, Epstein LH, Rodgers K, Cuevas J, Wileyto EP. Young adult smoking: What factors differentiate ex-smokers, smoking cessation treatment seekers and nontreatment seekers? *Addictive Behaviors*. 2009;34(12):1036-41.
3. Barber P, Lopez-Valcarcel BG, Pinilla J, Santana Y, Calvo JR, Lopez A. Attitudes of teenagers towards cigarettes and smoking initiation. *Substance use & misuse*. 2005;40(5):625-43.
4. Leatherdale ST, Ahmed R. Alcohol, marijuana, and tobacco use among Canadian youth: do we need more multi-substance prevention programming? *Journal of Primary Prevention*. 2010;31(3):99-108.
5. Leatherdale ST, Ahmed R, Vu M. Factors associated with different cigarette access behaviours among underage smoking youth who usually smoke contraband (Native) cigarettes. *Canadian Journal of Public Health*. 2011;102(2):103-7.
6. Leatherdale ST, McDonald PW. Youth smokers' beliefs about different cessation approaches: are we providing cessation interventions they never intend to use? *Cancer Causes & Control*. 2007;18(7):783-91.
7. Leatherdale ST, McDonald PW, Cameron R, Jolin MA, Brown KS. A multi-level analysis examining how smoking friends, parents, and older students in the school environment are risk factors for susceptibility to smoking among non-smoking elementary school youth. *Prevention Science*. 2006;7(4):397-402.
8. Leavy J, Wood L, Phillips F, Rosenberg M. Try and try again--qualitative insights into adolescent smoking experimentation and notions of addiction. *Health Promotion Journal of Australia*. 2010;21(3):208-14.
9. Leeman RF, Schepis TS, Cavallo DA, McFetridge AK, Liss TB, Krishnan-Sarin S. Nicotine dependence severity as a cross-sectional predictor of alcohol-related problems in a sample of adolescent smokers. *Nicotine & tobacco research : official journal of the Society for Research on Nicotine and Tobacco*. 2010;12(5):521-4.
10. Lowry R, Cohen LR, Modzeleski W, Kann L, Collins JL, Kolbe LJ. School violence, substance use, and availability of illegal drugs on school property among US high school students. *Journal of School Health*. 1999;69(9):347-55.
11. Maes HH, Woodard CE, Murrelle L, Meyer JM, Silberg JL, Hewitt JK, et al. Tobacco, alcohol and drug use in eight- to sixteen-year-old twins: the Virginia Twin Study of Adolescent Behavioral Development. *Journal of Studies on Alcohol*. 1999;60(3):293-305.
12. McGee R, Stanton WR. A longitudinal study of reasons for smoking in adolescence. *Addiction (Abingdon, England)*. 1993;88(2):265-71.
13. Milton B, Cook PA, Dugdill L, Porcellato L, Springett J, Woods SE. Why do primary school children smoke? A longitudinal analysis of predictors of smoking uptake during pre-adolescence. *Public Health*. 2004;118(4):247-55.
14. Milton MH, Maule CO, Backinger CL, Gregory DM. Recommendations and guidance for practice in youth tobacco cessation. *American journal of health behavior*. 2003;27:S159-69.



Supplementary file 2. Summaries of the included quantitative studies by disadvantaged group (n = 8).

| Author, Year, Country                | Study aims                                                                                                                         | Setting                                                  | Sample                                                                                                        | Response rate | Type of survey (cross-sectional, etc) | Outcome measure (and info on survey instrument)                                                                                       | Barriers to quitting (type and prevalence)                                                                                                                                                                                                                                                                                                                                                                                                       |
|--------------------------------------|------------------------------------------------------------------------------------------------------------------------------------|----------------------------------------------------------|---------------------------------------------------------------------------------------------------------------|---------------|---------------------------------------|---------------------------------------------------------------------------------------------------------------------------------------|--------------------------------------------------------------------------------------------------------------------------------------------------------------------------------------------------------------------------------------------------------------------------------------------------------------------------------------------------------------------------------------------------------------------------------------------------|
| <b>Quantitative studies</b>          |                                                                                                                                    |                                                          |                                                                                                               |               |                                       |                                                                                                                                       |                                                                                                                                                                                                                                                                                                                                                                                                                                                  |
| <b>Low SES groups</b>                |                                                                                                                                    |                                                          |                                                                                                               |               |                                       |                                                                                                                                       |                                                                                                                                                                                                                                                                                                                                                                                                                                                  |
| Price 1994(60)<br><br>USA            | Assess the perceptions of lung cancer and smoking in a socioeconomically disadvantaged sample.                                     | Telephone interviews in Ohio, USA.                       | n = 500<br>49% female<br>Age: mean = 58, SD = 18.2<br>Ethnicity: white (83%)                                  | 42%           | Cross-sectional.                      | Pre-designed survey instrument based on the Health Belief Model – 45 items.<br><br>Barriers: 5 items.<br>.79 reliability coefficient. | Habit: 82%<br>Prevents boredom: 48%<br>Helps to relax: 52%<br>Addiction: 86%<br>Many friends of smokers also smoke: 66%                                                                                                                                                                                                                                                                                                                          |
| Rosenthal et al 2013 (70)<br><br>USA | Identify the most endorse barriers and motivations to quitting an sociodemographic differences in the barriers to quitting report. | Six low income neighbourhoods in new haven, Connecticut. | n = 350<br>Ethnicity: 61% Black<br>20% Latino<br>12% White<br>Education: 56% High school diploma/ GED or less | 73%           | Cross-sectional                       | Gender, race/ethnicity, educational attainment, age, smoking status.<br>Barriers measure based on pre-existing survey (7 items).      | <i>Intrapersonal barriers</i><br>I don't want to quit: 37.4%<br>It is too difficult: 57.7%<br>I don't know how: 24.9%<br>I am afraid of gaining weight : 19.7%<br><i>Financial barrier</i><br>I can't afford the medication or nicotine replacement therapy products (such as the patch or gum): 30.9%<br><i>Support barrier</i><br>I don't have enough support: 25.7%<br><i>Social Influence barrier</i><br>Everyone I know uses tobacco: 33.1% |

| Author,<br>Year,<br>Country          | Study aims                                                                                                                                                          | Setting                                                    | Sample                       | Response rate | Type of survey<br>(cross-sectional,<br>etc) | Outcome<br>measure (and<br>info on survey<br>instrument)                                              | Barriers to quitting (type and<br>prevalence)                                                                                                                                                                                                                                                                                                                                                                                                                                                                                                                                                                                                                                                                                                                                                                                                                                              |
|--------------------------------------|---------------------------------------------------------------------------------------------------------------------------------------------------------------------|------------------------------------------------------------|------------------------------|---------------|---------------------------------------------|-------------------------------------------------------------------------------------------------------|--------------------------------------------------------------------------------------------------------------------------------------------------------------------------------------------------------------------------------------------------------------------------------------------------------------------------------------------------------------------------------------------------------------------------------------------------------------------------------------------------------------------------------------------------------------------------------------------------------------------------------------------------------------------------------------------------------------------------------------------------------------------------------------------------------------------------------------------------------------------------------------------|
| <b>People with a mental illness</b>  |                                                                                                                                                                     |                                                            |                              |               |                                             |                                                                                                       |                                                                                                                                                                                                                                                                                                                                                                                                                                                                                                                                                                                                                                                                                                                                                                                                                                                                                            |
| Asher et al<br>2003 (101)<br><br>USA | Report the relative frequency of endorsement of the various barriers as a source of guidance for clinicians wanting to motivate alcoholic patients to quit smoking. | Urban inpatient state-subsidized substance abuse facility. | 96 alcohol dependent smokers | 73%           | Cross sectional survey                      | 11 item True/False Barriers to Quitting Smoking in Substance Abuse Treatment (BQS-SAT) questionnaire. | If I quit smoking, I'll feel tense and irritable: 87%<br>If I quit smoking, I would feel anxious: 78%<br>When I don't smoke, I feel restless, and I can't concentrate: 56%<br>If I quit smoking, my urges to smoke will be so strong, I won't be able to stand it: 48%<br>I don't have the willpower to quit smoking: 47%<br>I need smoking to lift me up when I'm feeling down: 42%<br>Quitting smoking during substance abuse treatment would make it harder to stay sober: 41%<br>If I quit smoking, I would gain weight: 40%<br>Smoking gives me a lift when I'm feeling tired: 28%<br>If I quit smoking, I won't be able to sleep: 23%<br>If I quit smoking, my urges to drink or use drugs will be so strong I won't be able to stand it: 13%<br>Negative affect: 32%<br>Habit: 28%<br>Seeing others smoke or peer pressure: 22%.<br>Being addicted to more than one substance: 5% . |

| Author, Year, Country              | Study aims                                                                                                 | Setting                                  | Sample                                                                                                                                                                                        | Response rate | Type of survey (cross-sectional, etc) | Outcome measure (and info on survey instrument)                                        | Barriers to quitting (type and prevalence)                                                                                                                                                                                                                                                                                                                                                                                                                                       |
|------------------------------------|------------------------------------------------------------------------------------------------------------|------------------------------------------|-----------------------------------------------------------------------------------------------------------------------------------------------------------------------------------------------|---------------|---------------------------------------|----------------------------------------------------------------------------------------|----------------------------------------------------------------------------------------------------------------------------------------------------------------------------------------------------------------------------------------------------------------------------------------------------------------------------------------------------------------------------------------------------------------------------------------------------------------------------------|
|                                    |                                                                                                            |                                          |                                                                                                                                                                                               |               |                                       |                                                                                        | Compulsion and mental urges: 3%                                                                                                                                                                                                                                                                                                                                                                                                                                                  |
| Carosella et al 1999 (88).<br>USA. | Assess the barriers to and facilitators of quitting smoking in long term care inpatients.                  | Long term psychiatric care units.        | n = 92<br>98% male<br>Age: mean = 47.6<br>Diagnoses: substance abuse (60.9%); schizophrenia (55.4%); affective disorders (38%).                                                               | 77.7%         | Interviews.                           | Smoking status and history, demographic information, reasons for not quitting smoking. | Enjoyment: 47.2%<br>Habit : 36.1%<br>Boredom: 12.5%<br>Anxiety, nerves: 11.1%<br>Smoking does me good (e.g., relaxing, stimulating, stifles pain): 9.7%<br>Availability of cigarettes: 6.9%<br>Never had a reason/need to stop: 6.9%<br>I have emotional problems: 6.9%<br>Other stressors: 5.6%<br>Concentrating on other addictions: 4.2%<br>Smoking helps your appetite/digestion: 4.2%<br>I need some help to stop: 4.2%<br>Sociability of smoking: 2.7%<br>Don't know: 2.7% |
| Orleans et al 1993<br>USA          | Aimed to inform the design of nicotine addiction treatments tailored for patients with chemical dependency | Inpatient substance use treatment centre | n = 78<br>78% male<br>mean age = 36.6 (SD = 10.1)<br>78%: alcohol<br>9% drug problems including cocaine, heroin, marijuana and prescription medication<br>13% alcohol and other drug problems | Not reported  | Cross-sectional                       | Sociodemographic, smoking related characteristics, 9 item barriers survey.             | Missing or craving cigarettes: 68.4%<br>Being nervous, anxious or tense: 53.3%<br>Being around other smokers: 43.3%<br>Losing a pleasure: 39.4%<br>Coping with stress: 38.7%<br>Being afraid you'll fail: 27%<br>Gaining weight: 24.3%<br>Maintaining sobriety: 9.9%<br>Increased alcohol/drug use: 2.9%                                                                                                                                                                         |

1  
2  
3  
4  
5  
6  
7  
8  
9  
10  
11  
12  
13  
14  
15  
16  
17  
18  
19  
20  
21  
22  
23  
24  
25  
26  
27  
28  
29  
30  
31  
32  
33  
34  
35  
36  
37  
38  
39  
40  
41  
42  
43  
44  
45  
46  
47

| Author, Year, Country                 | Study aims                                                                                                                                       | Setting                                                                                                                                         | Sample                                                                                                                                                                                                                  | Response rate | Type of survey (cross-sectional, etc) | Outcome measure (and info on survey instrument)                                                                                                                                                                                                         | Barriers to quitting (type and prevalence)                                                                                                                                                                                                          |
|---------------------------------------|--------------------------------------------------------------------------------------------------------------------------------------------------|-------------------------------------------------------------------------------------------------------------------------------------------------|-------------------------------------------------------------------------------------------------------------------------------------------------------------------------------------------------------------------------|---------------|---------------------------------------|---------------------------------------------------------------------------------------------------------------------------------------------------------------------------------------------------------------------------------------------------------|-----------------------------------------------------------------------------------------------------------------------------------------------------------------------------------------------------------------------------------------------------|
| <b>Homeless groups</b>                |                                                                                                                                                  |                                                                                                                                                 |                                                                                                                                                                                                                         |               |                                       |                                                                                                                                                                                                                                                         |                                                                                                                                                                                                                                                     |
| Arnsten et al 2004 (106).<br><br>USA. | Evaluate predictors of readiness to quit and interest in cessation counselling in a homeless sample                                              | Homeless services at urban hospital                                                                                                             | n = 98<br>Age: mean = 44 years.<br>Median number of years homeless = 2.75<br>Predominantly white, unmarried, unemployed or disabled, males (proportions not provided).                                                  | Not reported. | Cross-sectional.                      | Smoking behaviour, reasons for quitting, readiness to quit, history of homelessness, alcohol and other drug history, psychiatric history, medical history, quit attempts, social support.                                                               | 21% believe the people closest to them would be very helpful in quitting smoking.<br><br>29% endorsed the item "People closest to you want you to quit very much".                                                                                  |
| Connor et al. 2002 (107).<br><br>USA. | Ascertain the prevalence of smoking, smoking cessation and how various factors associated with homelessness impact on readiness to quit smoking. | Emergency homeless services, residential drug treatment services, drop in centres for homeless in the city of Pittsburgh (9 homeless services). | n = 230<br>Male = 81%<br>Age: mean = 41.8, SD = 10.7.<br>Ethnicity: 54% African Americans; 40% white; 3% Hispanic; 3% other.<br>Homelessness: 46% living in transitional housing, 31% in shelter; street 20%; 3% living | >97%          | Cross-sectional.                      | Demographics, substance use history, housing status, Fagerstrom Test of Nicotine Dependence, Stage of Change, self-efficacy, barriers to cessation (as 5 potential barriers: cravings, other smokers, weight gain, habit, stress/mood), social support. | Cravings: 50%<br>Stress or mood swings: 44%<br>Being around others who smoke: 42%<br>Not receiving any support during quit attempt: 26%<br>Fear of weight gain: 20%<br>No specific treatments (pharmacological) could help them quit smoking: 31.6% |

| Author,<br>Year,<br>Country             | Study aims                                                                              | Setting                                                               | Sample                                                                                                                        | Response rate | Type of survey<br>(cross-sectional,<br>etc) | Outcome<br>measure (and<br>info on survey<br>instrument)                                                                                                         | Barriers to quitting (type and<br>prevalence)                                                                                                                                                                                                                                                                                                                                                                       |
|-----------------------------------------|-----------------------------------------------------------------------------------------|-----------------------------------------------------------------------|-------------------------------------------------------------------------------------------------------------------------------|---------------|---------------------------------------------|------------------------------------------------------------------------------------------------------------------------------------------------------------------|---------------------------------------------------------------------------------------------------------------------------------------------------------------------------------------------------------------------------------------------------------------------------------------------------------------------------------------------------------------------------------------------------------------------|
|                                         |                                                                                         |                                                                       | with<br>family/friends.                                                                                                       |               |                                             |                                                                                                                                                                  |                                                                                                                                                                                                                                                                                                                                                                                                                     |
| <b>Prisoner groups</b>                  |                                                                                         |                                                                       |                                                                                                                               |               |                                             |                                                                                                                                                                  |                                                                                                                                                                                                                                                                                                                                                                                                                     |
| Dickens et al<br>2005 (109).<br><br>UK. | To explore<br>psychiatric<br>inpatients<br>views of<br>smoking<br>cessation<br>options. | Forensic wards<br>of large<br>independent<br>psychiatric<br>hospital. | n = 34<br>57.8% male<br>Age: mean =<br>36.0, SD = 9.7<br>Ethnicity: not<br>reported.<br>88.9% legal<br>status of<br>detained. | 44.1%         | Cross-sectional.                            | Demographic<br>details, mental<br>health act status,<br>smoking<br>characteristics,<br>views on smoking<br>cessation and<br>rules on smoking<br>in the hospital. | Other patients smoking: 79.4%<br>The “smoky atmosphere” would make it<br>too difficult to stop smoking: 58.8%<br>Seeing members of staff smoking: 55.9%<br>Not enough encouragement from staff:<br>29.4%<br>Not enough information about giving up<br>smoking: 26.5%<br>“It’s just too difficult” to give up<br>smoking: 73.5%<br>Several smokers commented that<br>boredom was a factor in continuing to<br>smoke. |

Supplementary file 3. Summaries of the included qualitative studies by disadvantaged group (n = 54).

| Author, Year, Country               | Study aims                                                                                       | Setting                                                         | Sample                                                                                                                            | Method        | Interview schedule/discussion guide                                                                                                                                                        | Type of analysis                  | Barriers to quitting                                                                                                                                                                                                                                                                                                                                                                                                                                                                                                                                                         |
|-------------------------------------|--------------------------------------------------------------------------------------------------|-----------------------------------------------------------------|-----------------------------------------------------------------------------------------------------------------------------------|---------------|--------------------------------------------------------------------------------------------------------------------------------------------------------------------------------------------|-----------------------------------|------------------------------------------------------------------------------------------------------------------------------------------------------------------------------------------------------------------------------------------------------------------------------------------------------------------------------------------------------------------------------------------------------------------------------------------------------------------------------------------------------------------------------------------------------------------------------|
| <b>Low SES</b>                      |                                                                                                  |                                                                 |                                                                                                                                   |               |                                                                                                                                                                                            |                                   |                                                                                                                                                                                                                                                                                                                                                                                                                                                                                                                                                                              |
| Ahijevych 2003(49).<br><br>USA      | Investigate the beliefs and attitudes towards tobacco of current and former Appalachian smokers. | Non metropolitan Appalachian county.                            | n = 14<br>64% female<br>Age: mean = 33.7, SD = 8.7<br>Ethnicity: 100% white, non-Hispanic<br>High school education or less: 40.5% | Focus groups  | Roles of tobacco in life and community, factors helped or hindered previous quit attempts, community perceptions of tobacco use, and strategies for successful smoking cessation programs. | Content analysis.                 | Addiction to nicotine.<br>Cravings.<br>Smoking provides a rush.<br>Alleviating boredom.<br>Peers and family members who reinforced smoking.<br>Routine/ritual of smoking.<br>Social activities.<br>Associated behaviours: alcohol, caffeine, Weight gain.                                                                                                                                                                                                                                                                                                                    |
| Bancroft et al 2003 (50).<br><br>UK | Investigate barriers to quitting and accessing treatment in two disadvantaged areas of Scotland  | Two disadvantaged geographical areas in Scotland                | n = 100<br>50% female<br>Age: not reported<br>Ethnicity: not reported.<br>Housing tenure: 76% council housing                     | Interviews    | Smoking and quitting; future smoking, intentions to quit; habit and addiction.                                                                                                             | Thematic analysis.<br><br>NUDIST. | Addictive behaviour.<br>Habit.<br>Lack of alternatives.<br>Smoking is the only pleasurable activity to do.<br>Reward.<br>Deal with stress.<br>Alleviate boredom.<br>Alleviate stress from financial pressures.                                                                                                                                                                                                                                                                                                                                                               |
| Beech et al 2003 (51).<br><br>USA   | Investigate the cultural and social factors associated with African American low income smokers. | High schools, colleges, housing developments and trade schools. | n = 118<br>45% female<br>Age: between 18 and 35 years old.<br>Ethnicity: 100% African American.                                   | Focus groups. | Smoking initiation, smoking maintenance and cessation.                                                                                                                                     | Content analysis.                 | Equal numbers of participants reporting smoking managed their stress compared to those who reported smoking contributed to their stress.<br>Anxiety management.<br>Daily hassles and life events.<br>Energy and alertness.<br>Taking a break.<br>Boredom.<br>Managing certain medical conditions.<br>High levels of accessibility in communities.<br>Willpower and prayer were more highly valued as cessation methods than use of pharmacology or counselling.<br>High prevalence of smoking within social networks and communities: family, peers and the wider community. |

| Author, Year, Country               | Study aims                                                                                                                                                                                                             | Setting                                                                     | Sample                                                            | Method             | Interview schedule/discussion guide                                                                                                                        | Type of analysis                           | Barriers to quitting                                                                                                                                                                                                                                                                                                                                                                                                                                                                                                                                                                                                                                                                                                                                         |
|-------------------------------------|------------------------------------------------------------------------------------------------------------------------------------------------------------------------------------------------------------------------|-----------------------------------------------------------------------------|-------------------------------------------------------------------|--------------------|------------------------------------------------------------------------------------------------------------------------------------------------------------|--------------------------------------------|--------------------------------------------------------------------------------------------------------------------------------------------------------------------------------------------------------------------------------------------------------------------------------------------------------------------------------------------------------------------------------------------------------------------------------------------------------------------------------------------------------------------------------------------------------------------------------------------------------------------------------------------------------------------------------------------------------------------------------------------------------------|
| Bryant et al 2010 (52).<br><br>AUS  | Sought to describe the smoking behaviours and attitudes of disadvantaged Australian smokers attending SCSOs, including past experiences of quitting, preferences for quit support, and perceived barriers to quitting. | Five community welfare organisations located in New South Wales, Australia. | n = 32<br>69% female<br>Age: all participants aged over 16 years. | Focus groups.      | Current smoking behaviour, motivation to quit, past quit attempts, barriers to quitting and preferences for cessation support.                             | Thematic analysis.<br><br>Nvivo version 8. | Stress relief.<br>Calming, relaxing.<br>Alleviating boredom.<br>Coping mechanism.<br>A best friend.<br>Low self-efficacy – doubting ability to quit.<br>Viewing quitting as impossible.<br>Feeling ready and having willpower were integral to success.<br>Low knowledge of quit support.<br>Unsure how to correctly use NRT, belief NRT was ineffective, learning from others about the efficacy of NRT.<br>Knowledge of other pharmacotherapies was low.<br>Telephone quit lines usage also low.<br>Weight gain.<br>Limited perceived support from GPs and other health professionals.<br>High cost of NRT.<br>Repeated social and environmental exposure to smoking.<br>Norm within the community.<br>High prevalence of friends and family were smokers. |
| Copeland et al 2003 (53).<br><br>UK | To further examine the roles that smoking plays in the lives of the study group                                                                                                                                        | General practice in a deprived area of Edinburgh.                           | n = 51<br>100% female                                             | Open ended survey. | Open-ended questions regarding smoking characteristics, feelings and experiences regarding smoking, as well as measures of anxiety, depression and stress. | Content and category analysis.             | Lack of willpower.<br>Triggering event such as starting new job, marital problems, bereavement.<br>Nothing else to help cope.<br>Weight gain.<br>Social smoking.<br>Contact with other smokers.                                                                                                                                                                                                                                                                                                                                                                                                                                                                                                                                                              |
| Dunn et al 1998 (54)                | Explore attitudes and perceptions of smoking during pregnancy.                                                                                                                                                         | Neighbourhood centres and clinics in an urban area. .                       | n = 57.<br>100% female<br>Age: 77% aged 25 or younger             | Focus groups.      | Health concerns, sources of advice regarding pregnancy,                                                                                                    | Content analysis.                          | Internal factors:<br>Stress.<br>Boredom.<br>Addiction to nicotine.                                                                                                                                                                                                                                                                                                                                                                                                                                                                                                                                                                                                                                                                                           |

| Author, Year, Country              | Study aims                                                                                                      | Setting                                      | Sample                                                                                                                                                                                                    | Method        | Interview schedule/discussion guide                                                                                               | Type of analysis      | Barriers to quitting                                                                                                                                                                                                                                                                                                                                                                                                                                                                                                                                                                                                         |
|------------------------------------|-----------------------------------------------------------------------------------------------------------------|----------------------------------------------|-----------------------------------------------------------------------------------------------------------------------------------------------------------------------------------------------------------|---------------|-----------------------------------------------------------------------------------------------------------------------------------|-----------------------|------------------------------------------------------------------------------------------------------------------------------------------------------------------------------------------------------------------------------------------------------------------------------------------------------------------------------------------------------------------------------------------------------------------------------------------------------------------------------------------------------------------------------------------------------------------------------------------------------------------------------|
| USA                                | barriers to quitting, second hand smoke exposure, and preference for cessation programs among women of low SES. |                                              | Ethnicity: African Americans 24; Native Americans 23; white 10. High school education or less: 68%                                                                                                        |               | characteristics of useful programs, health effects of smoking, quitting, passive smoking exposure and attempts to avoid exposure. |                       | Withdrawal symptoms.<br>Strong cravings.<br>Weight gain.<br>Belief that smoking was not dangerous enough to warrant quitting.<br>Long term effects which participants do not consider.<br>External factors:<br>Being around friends and family members who smoked, including those who were not supportive of quit attempt.<br>Lack of control over exposure to smoke and influence of others.                                                                                                                                                                                                                               |
| Franco et al 2011 (55).<br><br>AUS | Increase knowledge on the barriers to smoking cessation and the acceptability of addressing smoking in SCSOs    | SCSO Illawarra region, NSW Australia         | n = 53<br>83% female                                                                                                                                                                                      | Focus groups. | Smoking and health, smoking cessation, support preferences, acceptability of addressing smoking in SCSO setting.                  | Notes based analysis. | Ritual.<br>Structures the day.<br>Reward after daily chores.<br>Something to do.<br>Stress management.<br>Concerns about the effectiveness of NRT.<br>Cost of NRT and other treatments too high.<br>Need more support to quit.                                                                                                                                                                                                                                                                                                                                                                                               |
| Lacey et al 1993 (93).<br><br>USA. | Increase understanding of the role of smoking and the challenges faced when attempting to quit.                 | Residents of public housing in Chicago, USA. | n = 6 – 8 participants per focus group (8 focus groups in total).<br>100% female.<br>Ethnicity: 100% African American.<br>42% not completed high school<br>100% had average yearly income < \$13,000 USD. | Focus groups. | Day to day activities, life stressors, community and living conditions,                                                           | Content analysis.     | Social isolation.<br>Lack of support.<br>Racially and economically segregated areas.<br>Fear limited outings to necessary activities.<br>Limited social networks outside of immediate family.<br>Stress management.<br>Substandard, unclean housing.<br>Few opportunities for recreation or employment.<br>Violence and crime.<br>Substance use.<br>Sense of control.<br>One of few attainable pleasures.<br>Legal and harmless for relatively small investment.<br>Perceived alternatives are drugs, alcohol abuse or losing control.<br>Low perceived harm.<br>Fatalistic beliefs/rationalisations/self-exempting beliefs. |



| Author, Year, Country               | Study aims                                                                                                                                                                                                                   | Setting                                                                              | Sample                                                                                                                                                                        | Method                      | Interview schedule/discussion guide                                    | Type of analysis                                                  | Barriers to quitting                                                                                                                                                                                                                                                                                                                                                                                                                                                                                                                                     |
|-------------------------------------|------------------------------------------------------------------------------------------------------------------------------------------------------------------------------------------------------------------------------|--------------------------------------------------------------------------------------|-------------------------------------------------------------------------------------------------------------------------------------------------------------------------------|-----------------------------|------------------------------------------------------------------------|-------------------------------------------------------------------|----------------------------------------------------------------------------------------------------------------------------------------------------------------------------------------------------------------------------------------------------------------------------------------------------------------------------------------------------------------------------------------------------------------------------------------------------------------------------------------------------------------------------------------------------------|
|                                     |                                                                                                                                                                                                                              |                                                                                      |                                                                                                                                                                               |                             |                                                                        |                                                                   | Other physical illness and disease that took priority – COPD, heart disease, kidney disease.<br>Belief that smoking is normal.<br>Belief that most adults smoke.<br>High prevalence in social network.<br>Hard to avoid smoking.<br>Belief that the only way to quit smoking was to do it cold turkey.<br>Low knowledge regarding how to quit and methods/help available.<br>Absence of specific constructive assistance.<br>Being self-reliant preferred over being dependent on help from someone.<br>Smoking cessation support not seen as effective. |
| Moffatt et al 2004 (57).<br><br>AUS | Aim to gain better understanding of the barriers to quitting in blue collar workers                                                                                                                                          | Two antenatal clinics in Brisbane, QLD servicing predominantly low SES participants. | n = 25<br>100% male<br>Age: between 20 and 53 years old                                                                                                                       | Semi-structured interviews. | Questions developed from literature review and pilot study.            | Constant comparative method – conceptual analysis.<br><br>NUDIST. | Lack of control over smoking.<br>Long positive association with cigarettes – cool, sophisticated.<br>Lack of support to quit.<br>Withdrawal - negative feelings such as anger/irritability.<br>Peer pressure.<br>Relaxation.<br>Social contexts.<br>Habit – daily routine.                                                                                                                                                                                                                                                                               |
| Nichter et al 2007 (58).<br><br>USA | To uncover the factors that facilitate smoking during pregnancy and those that facilitate quitting; investigate the use of harm reduction practices used by pregnant women and the effects of social networks on smoking and | Large urban city.                                                                    | n = 53<br>100% female<br>Age: mean = 25, ranged from 18 – 43 years.<br>Ethnicity:<br>Anglo-American 62%;<br>Mexican American 21%;<br>African American 11%,<br>multiethnic 6%. | Semi-structured interviews  | Interview questions developed from pilot material with key informants. | ATLAS ti 5.0 software.                                            | Low social support.<br>Living in more than one residence during pregnancy.<br>Not being head of household/able to make decisions regarding smoking policy and house.<br>No stable employment.<br>No family/peer support.<br>Smoking helped women manage anger, frustration, control and autonomy.<br>Coping strategy.<br>History of depression.<br>Smoking seen as lesser evil compared to alcohol or other drugs.<br>Less clear about direct outcomes for baby.<br>Rationalisations “defence mechanisms/downplaying                                     |

| Author, Year, Country                     | Study aims                                                                                                                              | Setting                                                                  | Sample                                                | Method                              | Interview schedule/discussion guide                                                                               | Type of analysis                        | Barriers to quitting                                                                                                                                                                                                                                                                                                                                                                                                                                                          |
|-------------------------------------------|-----------------------------------------------------------------------------------------------------------------------------------------|--------------------------------------------------------------------------|-------------------------------------------------------|-------------------------------------|-------------------------------------------------------------------------------------------------------------------|-----------------------------------------|-------------------------------------------------------------------------------------------------------------------------------------------------------------------------------------------------------------------------------------------------------------------------------------------------------------------------------------------------------------------------------------------------------------------------------------------------------------------------------|
|                                           | cessation.                                                                                                                              |                                                                          | High school education or less: 74%<br>Unemployed: 60% |                                     |                                                                                                                   |                                         | medical risks/prioritising less stress over smoking damage.<br>No helpful guidance from health professionals.                                                                                                                                                                                                                                                                                                                                                                 |
| Paul et al 2010 (29).<br><br>AUS          | Examine the experience of the social context of smoking and whether this experience differed by sociodemographic characteristics        | Local community facilities in high and low SEIFA suburbs in Sydney, Aus. | n = 4 – 8 participants per group (8 groups in total). | Focus groups.                       | Smoking behaviour and history; current and future smoking environments; environmental factors related to smoking. | Thematic analysis.                      | Nostalgia for smoking that was once cool and sophisticated.<br>Weight control.<br>Not noticing any decrease in the smoking prevalence in their community over time.<br>Social/peer groups predominantly made up of smokers.<br>Social activity.<br>High perceived acceptability of smoking.<br>Work environment being more conducive to smoking.<br>Lack of smoking restriction at workplace.<br>Acceptability of smoking in open air environments in low SEP neighbourhoods. |
| Peretti-Watel et al 2009 (59).<br><br>FRA | To increase understanding of low socioeconomic status and smoking through investigating smoking motives.                                | South –east of France – social work centres and participants homes.      | n = 31                                                | In depth semi-structured interviews | Brief topic guide mentioned but not presented.                                                                    | Based on principles of grounded theory. | Addiction.<br>Pleasure and happiness.<br>Satisfied essential needs.<br>Relieves stress.<br>Fills void in everyday life – nothing else to do.<br>Only leisure activity they can afford.<br>Combat loneliness.<br>Manage other addictions.<br>Stressful life events such as break up of relationship or loss of job.                                                                                                                                                            |
| Roddy et al 2006 (61).<br><br>UK          | Determine level of awareness of stop smoking services in deprived area and identify specific barriers and motivators to improve access. | Most deprived districts in Greater Nottingham.                           | n = 39                                                | Focus groups.                       | Smoking behaviour, cessation experiences, knowledge and perceptions of existing services.                         | NUD*IST 6 software.                     | Lack of knowledge of services.<br>Misconceptions about attitudes within services.<br>Being judged by health professionals.<br>Feeling they would need intensive support to quit.<br>NRT was expensive and ineffective (many contraindications).<br>Bupropion was negatively associated with adverse events reported in media.<br>Stress.<br>Rationalisations.<br>Failed quit attempts in the past.                                                                            |

| Author, Year, Country               | Study aims                                                                                             | Setting                                                                                                    | Sample                                                                 | Method                     | Interview schedule/discussion guide                                                                                                         | Type of analysis   | Barriers to quitting                                                                                                                                                                                                                                                                                                                                                                                                                                                                                                                                                                                                                                                                                                                                                                                                                                                                                                                                                                                                                                                                                                                                                                                                                                                                    |
|-------------------------------------|--------------------------------------------------------------------------------------------------------|------------------------------------------------------------------------------------------------------------|------------------------------------------------------------------------|----------------------------|---------------------------------------------------------------------------------------------------------------------------------------------|--------------------|-----------------------------------------------------------------------------------------------------------------------------------------------------------------------------------------------------------------------------------------------------------------------------------------------------------------------------------------------------------------------------------------------------------------------------------------------------------------------------------------------------------------------------------------------------------------------------------------------------------------------------------------------------------------------------------------------------------------------------------------------------------------------------------------------------------------------------------------------------------------------------------------------------------------------------------------------------------------------------------------------------------------------------------------------------------------------------------------------------------------------------------------------------------------------------------------------------------------------------------------------------------------------------------------|
| Stead et al 2001 (62).<br><br>UK    | To investigate how smoking is fostered in areas that experience multiple forms of deprivation          | Housing estates within 8 communities in Glasgow having DEPCAT scores of 7 (highest scores of deprivation). | n = 53<br>Sample selected according to age, gender and smoking status. | Focus groups               | Smoking characteristics, smoking history, leisure activities, work and unemployment, cessation history, experiences of the local community. | Thematic analysis. | <p>Coping mechanism – dealing with stress directly related to living in a deprived community.</p> <p>Stressors include: limited income, caring for children, poor local infrastructure, high levels of crime and drug use, limited opportunities for rest and respite from community.</p> <p>High accessibility of cigarettes (legal, illegal and informal sources).</p> <p>Socialising.</p> <p>Main pleasure (cheap and easily accessible).</p> <p>Smoking alleviated anxiety and nervousness.</p> <p>Coping with frustration and demotivation of widespread unemployment.</p> <p>Normative influence of being surrounded by smoking.</p> <p>Accepted smoking as inevitable and preferable to other drug use.</p> <p>Deprived communities experienced feeling cut off from other communities (that were more advantaged) thus weren't exposed to other norms.</p> <p>Belonging and identity.</p> <p>Smoking compensates exclusion and binds communities together.</p> <p>Deepening financial hardship.</p> <p>Fears of not being able to cope without cigarettes.</p> <p>Limited awareness of help available.</p> <p>Lack of trust regarding efficacy of medications and cynicism about health professionals financially exploiting smokers.</p> <p>Little support from community.</p> |
| Stewart et al 1996 (63).<br><br>CAN | Examine the factors associated with barriers and supports to smoking cessation in disadvantaged women. | Atlantic region, Canada.                                                                                   | n = 386<br>100% female                                                 | Semi-structured interviews | Interview guides were used but not described.                                                                                               | Content analysis.  | <p>Linked with poverty, isolation, and caregiving.</p> <p>Coping mechanism.</p> <p>Associated fear, anger and anxiety.</p> <p>Reward.</p> <p>Pleasure.</p> <p>Addiction.</p> <p>Short and long term goals – struggle for 'survival'; therefore long term benefits of quitting had little impact.</p>                                                                                                                                                                                                                                                                                                                                                                                                                                                                                                                                                                                                                                                                                                                                                                                                                                                                                                                                                                                    |

| Author, Year, Country                   | Study aims                                                                                         | Setting                                                                                    | Sample                                                                        | Method                      | Interview schedule/discussion guide                                                                                                                                                                                | Type of analysis                  | Barriers to quitting                                                                                                                                                                                                                                                                                                                                                                                                                                                                                                                                                                      |
|-----------------------------------------|----------------------------------------------------------------------------------------------------|--------------------------------------------------------------------------------------------|-------------------------------------------------------------------------------|-----------------------------|--------------------------------------------------------------------------------------------------------------------------------------------------------------------------------------------------------------------|-----------------------------------|-------------------------------------------------------------------------------------------------------------------------------------------------------------------------------------------------------------------------------------------------------------------------------------------------------------------------------------------------------------------------------------------------------------------------------------------------------------------------------------------------------------------------------------------------------------------------------------------|
|                                         |                                                                                                    |                                                                                            |                                                                               |                             |                                                                                                                                                                                                                    |                                   | Not using traditional cessation support services – negative reactions from those that had.<br>Personal determination and willpower were integral to success.<br>Cessation aids viewed as ineffective or harmful.<br>Believed that poverty, abuse and alcoholism more damaging to society – antagonistic towards tobacco control measures.                                                                                                                                                                                                                                                 |
| Stewart et al 1996 (64).<br><br>CAN     | Identify social-psychological factors associated with smoking cessation among disadvantaged women. | Atlantic region of Canada<br><br>Research carried out in sites accessible to participants. | n = 126<br>100% female                                                        | Focus groups and interviews | Reasons for smoking and continuing to smoke, impact of anti-smoking media messages, opinions and experiences regarding smoking cessation, strategies, services and support that would help stop or reduce smoking. | Content analysis.                 | Weight gain.<br>Low expectation of support from health professionals and health agencies – lack of confidence in GPs and nurses.<br>Rarely contacted national/peak bodies like Lung association or Cancer Society.<br>Geographical isolation, lack of awareness of role and scepticism.<br>Lack of social support – partners, immediate family, friends and acquaintances.                                                                                                                                                                                                                |
| Stewart et al 2011 (65).<br><br>Canada. | Identify the needs and preference of female smokers from low socioeconomic background ds.          | Three large urban cities in Canada.                                                        | n = 64<br>100% female<br>Age: mean = 37<br>High school education or less: 68% | Focus groups.               | Smoking characteristics, cessation attempts and experiences, preferences for support to quit and resources.                                                                                                        | Thematic analysis.<br><br>QSR N6. | Limited employment opportunities.<br>Reliance on welfare and benefit payments.<br>Low socioeconomic status – poverty, low education, unemployment and the stress caused by these factors.<br>Lack of affordable childcare.<br>Management of emotions and stress – anger, upset, anxiety.<br>Coping mechanism.<br>One of few pleasures available.<br>Relaxation.<br>Reward.<br>Boredom, lack of access to recreational activities.<br>Smoking linked to feelings of loneliness and hopelessness regarding poverty.<br>Smoking as habit – linked to other behaviours – drinking coffee etc. |
| Stillman et                             | Increase knowledge of                                                                              | Employment and training and                                                                | n = 28                                                                        | Focus groups                | Social norms and smoking, how                                                                                                                                                                                      | Atlas.ti v 3. software.           | Smoking seen as normal, very common and not problematic.                                                                                                                                                                                                                                                                                                                                                                                                                                                                                                                                  |

| Author, Year, Country     | Study aims                                                                                                   | Setting                                                                                                                                                                | Sample                                                        | Method                                             | Interview schedule/discussion guide                                                                                                                   | Type of analysis    | Barriers to quitting                                                                                                                                                                                                                                                                                                                                                                                                                                                                                                                                                                                                                                                                                                                                                                                                                                                                                                                                                                                                                                    |
|---------------------------|--------------------------------------------------------------------------------------------------------------|------------------------------------------------------------------------------------------------------------------------------------------------------------------------|---------------------------------------------------------------|----------------------------------------------------|-------------------------------------------------------------------------------------------------------------------------------------------------------|---------------------|---------------------------------------------------------------------------------------------------------------------------------------------------------------------------------------------------------------------------------------------------------------------------------------------------------------------------------------------------------------------------------------------------------------------------------------------------------------------------------------------------------------------------------------------------------------------------------------------------------------------------------------------------------------------------------------------------------------------------------------------------------------------------------------------------------------------------------------------------------------------------------------------------------------------------------------------------------------------------------------------------------------------------------------------------------|
| al 2007 (66).<br>USA.     | environmental factors that facilitate or prevent young AA from smoking cessation.                            | education programs – inner city.                                                                                                                                       |                                                               |                                                    | tobacco was sourced, socialisation and smoking and smoking restrictions and advertising.                                                              |                     | Faced few restrictions regarding smoking. “Loosies” (single cigarettes) were easily accessible.                                                                                                                                                                                                                                                                                                                                                                                                                                                                                                                                                                                                                                                                                                                                                                                                                                                                                                                                                         |
| Tod 2003 (67).<br>UK      | Explore the reasons why pregnant women do not quit and are less likely to access smoking cessation services. | South Yorkshire Coalfields (SYC) – deprived area with high prevalence of smoking. Pregnant women known to maternity services within this area. Approached by midwives. | n = 11<br>100% female<br>Age: ranged from 19 to 38 years old. | Semi-structured interviews via telephone.          | Smoking history; obstetric history; factors influencing access to smoking cessation services; knowledge and beliefs; preferences for future services. | Framework analysis. | Addiction.<br>Only cutting down for baby; plan to resume after birth.<br>Enjoyment.<br>Belief that willpower is essential for success.<br>Cutting down but missing that extra strength to finally quit.<br>Pressures and stresses of life.<br>Lack of willpower linked to self-fulfilling prophecy; relapse was viewed as inevitable.<br>Smoking during pregnancy safest, and healthiest, and preferred course of action.<br>Housework; childcare, financial anxieties and relationships.<br>Protecting mental health.<br>Familiar and necessary tool to cope.<br>Smoking controlling appetite for weight concerns and also to control hunger.<br>Food was sacrificed in order to afford cigarettes.<br>Partners’ smoking affected motivation to quit.<br>Being around people who were smoking.<br>Timing of smoking cessation advice coinciding with tests for babies’ health.<br>Judgemental attitudes from service providers.<br>Lack of childcare options.<br>Minimizing risk of smoking.<br>Participants own experience discredited health advice. |
| Tsourtos et al 2008 (68). | Understand the barriers to quitting smoking, especially in relation to stress, in order to                   | The most disadvantaged are (local government area) in metropolitan Adelaide.                                                                                           | n = 29<br>48% female.                                         | Focus groups (2) and in depth telephone interviews | Barriers to quitting smoking (focus on stress), reasons for quitting, stress and quit attempts.                                                       | Not reported.       | Stressful environments including: financial stress, child rearing, family issues, employment disadvantage, increased morbidity and mortality within community (including smoking related illness), and difficulties in the workplace.<br>NRT too expensive to maintain.                                                                                                                                                                                                                                                                                                                                                                                                                                                                                                                                                                                                                                                                                                                                                                                 |

| Author, Year, Country            | Study aims                                                                                                     | Setting                                                                       | Sample                                                                                               | Method                      | Interview schedule/discussion guide                                                                                                                          | Type of analysis              | Barriers to quitting                                                                                                                                                                                                                                                                                                                                                                                                                                                                                                   |
|----------------------------------|----------------------------------------------------------------------------------------------------------------|-------------------------------------------------------------------------------|------------------------------------------------------------------------------------------------------|-----------------------------|--------------------------------------------------------------------------------------------------------------------------------------------------------------|-------------------------------|------------------------------------------------------------------------------------------------------------------------------------------------------------------------------------------------------------------------------------------------------------------------------------------------------------------------------------------------------------------------------------------------------------------------------------------------------------------------------------------------------------------------|
| AUS                              | understand the differences in cessation rates between the groups.                                              |                                                                               |                                                                                                      | (11).                       |                                                                                                                                                              |                               | Financial stress.<br>Stress that arises from childrearing and women having a smoke to get 'time out'.<br>Partner smoking.<br>Increased morbidity and mortality in community, including due to smoking related illness.<br>Habit of smoking; ritualised behaviour.<br>Lack of control.<br>Addiction.<br>Cravings.<br>Boredom.<br>Smoking to alleviate stress.<br>Some respondents held the belief that it was not tobacco/cigarettes themselves that provided stress relief, but the chance to relax.                   |
| White & Baird 2013 (71)<br>UK    | Explore perspectives of former miners in disadvantaged former coal mining communities on smoking and cessation | Former coal mining towns and villages in Bolsover district, North Derbyshire. | n = 16<br>All participants white, male and British.<br>Aged between 45 and 68.<br>All former miners. | Interviews                  | Perspectives on smoking, stopping smoking and stop smoking services.                                                                                         | Content analysis              | Attributing health issues to coal dust exposure rather than smoking.<br>Comparing the risks of coal mining to the risks of smoking.<br>Participants reported being able to stop smoking at will with minimal difficulty and need for support, despite all previous attempts being unsuccessful.                                                                                                                                                                                                                        |
| Wiltshire et al 2003 (69).<br>UK | Examine participants' views on quitting smoking and smoking and how that may be affected by their lives.       | Two health centres in two areas of deprivation in Scotland.                   | n = 100<br>50% male<br>Housing: 76% council/housing association                                      | Semi-structured interviews. | Daily consumption patterns, reasons for smoking, wider community environment, experiences of quitting and changes in smoking status, future quit intentions. | Thematic analysis.<br>NUD*ST. | Stress Management.<br>Coping mechanism.<br>Living, socializing and working with other smokers.<br>Smoking 'deeply embedded' in their lives.<br>Smoking was normalized and routine contact with other smokers made quitting even more difficult.<br>Only way to quit is remove yourself completely from your environment.<br>Addiction to nicotine.<br>Cravings.<br>Withdrawal symptoms and their impact on family/friends.<br>Stressful life circumstances.<br>Belief that NRT not up to task of replacing cigarettes. |

| Author, Year, Country               | Study aims                                                                                                                                                  | Setting                                                  | Sample                                                                                                                          | Method        | Interview schedule/discussion guide                                                                                                 | Type of analysis   | Barriers to quitting                                                                                                                                                                                                                                                                                                                                                                                                                                                                                                                                                                                            |
|-------------------------------------|-------------------------------------------------------------------------------------------------------------------------------------------------------------|----------------------------------------------------------|---------------------------------------------------------------------------------------------------------------------------------|---------------|-------------------------------------------------------------------------------------------------------------------------------------|--------------------|-----------------------------------------------------------------------------------------------------------------------------------------------------------------------------------------------------------------------------------------------------------------------------------------------------------------------------------------------------------------------------------------------------------------------------------------------------------------------------------------------------------------------------------------------------------------------------------------------------------------|
|                                     |                                                                                                                                                             |                                                          |                                                                                                                                 |               |                                                                                                                                     |                    | <p>Cost of NRT.</p> <p>Word of mouth regarding bad/unsuccessful attempts with NRT.</p> <p>Boredom and times of inactivity.</p> <p>Characteristics of living in a disadvantaged area - violence, crime.</p> <p>Willpower was essential in order to be able to quit smoking.</p>                                                                                                                                                                                                                                                                                                                                  |
| <b>Indigenous studies</b>           |                                                                                                                                                             |                                                          |                                                                                                                                 |               |                                                                                                                                     |                    |                                                                                                                                                                                                                                                                                                                                                                                                                                                                                                                                                                                                                 |
| Burgess et al 2007 (72).<br><br>USA | Explore the cultural factors associated with experience and perceptions regarding tobacco use, cessation and dependence treatments.                         | Minneapolis/St Paul metropolitan area.                   | n = 26 American Indian participants<br>30% female                                                                               | Focus groups. | Smoking, smoking cessation and tobacco dependence treatments.                                                                       | Content analysis.  | <p>Smoking as highly acceptable and widespread within community.</p> <p>Traditional ceremonial use of tobacco.</p> <p>Addiction.</p> <p>Cravings.</p> <p>Withdrawal symptoms.</p> <p>Stressful circumstances.</p> <p>Suspicion towards pharmacotherapy.</p> <p>Scepticism about benefits of pharmacotherapy and negative views of medical profession in general.</p> <p>For women, smoking was seen as way to care for self in face of multiple responsibilities.</p> <p>Women used to manage stress, negative emotions, deal with life demands including children, work and family.</p> <p>Weight control.</p> |
| Choi et al 2006 (73).<br><br>USA.   | Assess smoking behaviour, cessation, traditional tobacco use and attitudes towards a smoking cessation program in a sample of American Indian participants. | Health Centre based within an Indian Nations University. | n = 41 American Indian participants<br>63% female<br>Age: mean = 41 (SD = 12.3) ranged from 21-67<br>63% some college education | Focus groups. | 1. Tobacco use (including ceremonial and non-ceremonial)<br>2. Smoking and quitting.<br>3. Smoking cessation program "Second Wind". | Themes identified. | <p>Traditional or ceremonial use of tobacco.</p> <p>Use of tobacco important to maintain an 'Indian' identity.</p> <p>Relapse in social situations.</p> <p>Normative behaviour.</p> <p>Highly prevalent: everyone smokes.</p> <p>Stressful situations.</p> <p>Belief that quitting smoking "takes personal motivation and a person will not be able to quit unless he or she has determination and self-control and really wants to quit".</p> <p>Most had tried NRT – cost was a barrier to getting more NRT.</p> <p>Nightmares were attributed to bupropion and NRT.</p>                                      |

1  
2  
3  
4  
5  
6  
7  
8  
9  
10  
11  
12  
13  
14  
15  
16  
17  
18  
19  
20  
21  
22  
23  
24  
25  
26  
27  
28  
29  
30  
31  
32  
33  
34  
35  
36  
37  
38  
39  
40  
41  
42  
43  
44  
45  
46  
47

| Author, Year, Country              | Study aims                                                                    | Setting                                         | Sample                                                     | Method                                       | Interview schedule/discussion guide                                      | Type of analysis                           | Barriers to quitting                                                                                                                                                                                                                                                                                                                                                                                                                                                                                                                                                                                                                                                                                                                                                                                                                                                                                                                                                                                                                                                                                                                                                                                                                                                                                                                                                                                                                                                                                                                                                                                                                                                                                                                                                                                           |
|------------------------------------|-------------------------------------------------------------------------------|-------------------------------------------------|------------------------------------------------------------|----------------------------------------------|--------------------------------------------------------------------------|--------------------------------------------|----------------------------------------------------------------------------------------------------------------------------------------------------------------------------------------------------------------------------------------------------------------------------------------------------------------------------------------------------------------------------------------------------------------------------------------------------------------------------------------------------------------------------------------------------------------------------------------------------------------------------------------------------------------------------------------------------------------------------------------------------------------------------------------------------------------------------------------------------------------------------------------------------------------------------------------------------------------------------------------------------------------------------------------------------------------------------------------------------------------------------------------------------------------------------------------------------------------------------------------------------------------------------------------------------------------------------------------------------------------------------------------------------------------------------------------------------------------------------------------------------------------------------------------------------------------------------------------------------------------------------------------------------------------------------------------------------------------------------------------------------------------------------------------------------------------|
| Dawson et al 2012 (74).<br><br>AUS | Increase understanding of barriers within Aboriginal Health Worker workforce. | Metropolitan, rural and remote health services. | n = 34<br>Aboriginal Australian participants<br>44% female | Semi structured interviews and focus groups. | Factors related to relapse, not wanting to quit, challenges in quitting. | Content analysis.<br><br>NVivo 8 software. | <p>Largest barriers to NRT use were cost and accessibility.</p> <p>Stress, grief and loss – due to health concerns, excessive work demands, family issues, inequity in workplace, institutionalised racism and pervasiveness of social disadvantage.</p> <p>Chronic disease, burden of illness, premature deaths in community.</p> <p>Fear – of failure, feeling sick (withdrawal symptoms), weight gain, and losing a coping strategy.</p> <p>Smoking not being a problem – rationalizations as well as just the belief that it’s not a problem.</p> <p>Quitting not the greatest priority in their lives.</p> <p>Lack of knowledge about quit methods – unsure about the benefits of certain pharmacological methods.</p> <p>Lack of access to relevant quit smoking aids – culturally appropriate, cost.</p> <p>Nicotine addiction – biological addiction was rarely referenced.</p> <p>Social pressure to smoke – living and socialising with smokers.</p> <p>Situations where alcohol was consumed or with high number of other smokers.</p> <p>Quitting means exclusion from this network.</p> <p>Offence at not participating – maintaining connectedness.</p> <p>Lack of support/role models – few friends and family/community members who had quit successfully, intolerance of mood changes around when quitting.</p> <p>Pressure to quit from non-smokers – ‘picked on’, line between encouragement and beleaguering.</p> <p>Smoking common in the workplace – acceptable, organisational culture enabled smoking, create bond between clients and workers, challenge sin enforcing smoke free policies.</p> <p>Smoking was pervasive and acceptable within community, inability to avoid smoking – high prevalence impacted by historical role of tobacco, culturally and colonial influence.</p> |



| Author, Year, Country              | Study aims                                                                                                                | Setting                                         | Sample                                                   | Method                     | Interview schedule/discussion guide                                                                                                    | Type of analysis                  | Barriers to quitting                                                                                                                                                                                                                                                                                                                                                                                                                                                                                                                                                                                                                                                                                                                                                                                                                                                                                                                                                                                                                                                                                                                                                                                                                                                                                                                  |
|------------------------------------|---------------------------------------------------------------------------------------------------------------------------|-------------------------------------------------|----------------------------------------------------------|----------------------------|----------------------------------------------------------------------------------------------------------------------------------------|-----------------------------------|---------------------------------------------------------------------------------------------------------------------------------------------------------------------------------------------------------------------------------------------------------------------------------------------------------------------------------------------------------------------------------------------------------------------------------------------------------------------------------------------------------------------------------------------------------------------------------------------------------------------------------------------------------------------------------------------------------------------------------------------------------------------------------------------------------------------------------------------------------------------------------------------------------------------------------------------------------------------------------------------------------------------------------------------------------------------------------------------------------------------------------------------------------------------------------------------------------------------------------------------------------------------------------------------------------------------------------------|
|                                    |                                                                                                                           |                                                 |                                                          |                            |                                                                                                                                        |                                   | Smoking behaviours weren't questioned.<br>Lack of policies to promote smoke free environments, short term funding of tobacco programs, inadequate investment for organisations.                                                                                                                                                                                                                                                                                                                                                                                                                                                                                                                                                                                                                                                                                                                                                                                                                                                                                                                                                                                                                                                                                                                                                       |
| Dawson et al 2012 (75).<br><br>AUS | Explore the perceptions of Aboriginal Health Workers in relation to individual and contextual factors relating to smoking | Metropolitan, rural and remote health services. | n = 34<br>Aboriginal Australian participants<br>44% male | Semi-structured interviews | Current smoking and smoking history; reasons for continuing to smoke; typical weekday and weekend when smoking occurred; quit history. | Content analysis.<br><br>NVivo 8. | Stress: relationships and family issues; financial problems; community issues and work challenges.<br>Poor physical and mental health e.g. anxiety, depression, chronic pain.<br>Associative behaviours: getting in the car; drinking alcohol or caffeinated drinks, watching television, going outside.<br>Habit (tactile) – having something in their hands.<br>Boredom – 'time on one's hand'.<br>Awareness of 'nicotine addiction' only reported by 2 participants.<br>Chronic disease burden – heart disease, emphysema, diabetes, cancer.<br>Grief and loss – reduced life expectancy.<br>Caring for family – health support and advice; financial obligations and housing.<br>Breakdown in family dynamics: single parent families; isolation; stolen generation.<br>Socialisation and connection: social lubricant; belonging.<br>Debriefing opportunity – after stressor.<br>Co-worker, friend, family, client encouragement to smoke. Active and passive encouragement.<br>Demanding work, including out of hours.<br>Job insecurity and financial insecurity. Institutionalised racism.<br>Dispossession of land; collective grief and loss; prevalent racism; social disadvantage; poverty, homelessness; unemployment, chronic disease, drug abuse; gambling, violence, housing issues; imprisonment, lack of education. |
| Dennis et al 2012 (76).            | Qualitatively explore tobacco, alcohol and other                                                                          | Rural reservation in Midwestern state of USA.   | n = 49<br>American Indian                                | Focus groups.              | Not reported.                                                                                                                          | Thematic analysis.                | Lenient attitudes towards smoking.<br>Generational use (parents and grandparents to children).<br>Accessibility of cigarettes (easy access through friends)                                                                                                                                                                                                                                                                                                                                                                                                                                                                                                                                                                                                                                                                                                                                                                                                                                                                                                                                                                                                                                                                                                                                                                           |

| Author, Year, Country                         | Study aims                                                                                                                                              | Setting                                               | Sample                                                                 | Method                                                   | Interview schedule/discussion guide                                                                                                                           | Type of analysis                                               | Barriers to quitting                                                                                                                                                                                                                                                                                                                                                                                                                                                                                                                                                                                                                                                                                                                                                                                                                                                                                                                                                                                                                                        |
|-----------------------------------------------|---------------------------------------------------------------------------------------------------------------------------------------------------------|-------------------------------------------------------|------------------------------------------------------------------------|----------------------------------------------------------|---------------------------------------------------------------------------------------------------------------------------------------------------------------|----------------------------------------------------------------|-------------------------------------------------------------------------------------------------------------------------------------------------------------------------------------------------------------------------------------------------------------------------------------------------------------------------------------------------------------------------------------------------------------------------------------------------------------------------------------------------------------------------------------------------------------------------------------------------------------------------------------------------------------------------------------------------------------------------------------------------------------------------------------------------------------------------------------------------------------------------------------------------------------------------------------------------------------------------------------------------------------------------------------------------------------|
| USA                                           | drug use in a sample of American Indians living on a rural reservation.                                                                                 |                                                       | participants<br>61% female<br>Age: 18 – 54<br>(57.2%)                  |                                                          |                                                                                                                                                               |                                                                | and family; cheaper to purchase on reservation).<br>Smoking linked with other behaviours (gambling, alcohol use).<br>High prevalence of smoking in community.                                                                                                                                                                                                                                                                                                                                                                                                                                                                                                                                                                                                                                                                                                                                                                                                                                                                                               |
| Fernandez et al 2008 (77).<br><br>New Zealand | Investigate the perception of smoking cessation in Maori women                                                                                          | One local Maori organisation                          | n = 5 Maori participants<br>100% female                                | Focus group.                                             | Perceptions of smoking and quitting, triggers for smoking, quit smoking policies and initiatives from the government, and mass media campaigns and marketing. | Thematic analysis.                                             | Observing health professionals smoking.<br>Limited support from other smokers (feeling negatively judged by other smokers when trying to quit).<br>Maori women felt more comfortable accessing health care from a Maori provider rather than a mainstream service.<br>All participants stated they would never ring the National Quitline (trust, disclosing information and allowing someone to assist them who is not known were the reasons cited for this).<br>Asking a stranger for help deemed unacceptable.                                                                                                                                                                                                                                                                                                                                                                                                                                                                                                                                          |
| Fu et al 2007 (78).<br><br>USA                | Increase understanding of the experiences of smoking cessation in 4 different ethnic groups: American Indians, Hmong, Vietnamese and African Americans. | Seven community organizations in Minneapolis/St Paul. | n = 26 American Indian participants (6 focus groups).<br>44.4% female. | Focus groups conducted separately for each ethnic group. | Discussion guide: smoking, smoking cessation, and help with quitting.                                                                                         | Methods for analysing qualitative data.<br><br>Atlas.ti, v 5.0 | Counselling was associated with an unequal power relationship between a white counsellor who was going to shame the participants about their smoking behaviour.<br>Rationalisations: “it's not like I'm dying today”.<br>Cynicism about the medical profession, including beliefs that doctors are untrustworthy, driven by monetary gain, and hypocritical.<br>Negative experiences with particular doctors including doctors being confrontational, blaming and impersonal.<br>Most had low levels of knowledge about the functional benefits of pharmacotherapy.<br>Participants did not understand that pharmacotherapy could be used to help them with cravings and withdrawal symptoms.<br>Concerns about side effects (e.g., overestimation of risks of side effects compared to risks of smoking).<br>Cost of medications and lack of accessibility perceived as major barriers to their use.<br>Word of mouth was a powerful influence on decisions to use or not use pharmacotherapy.<br>American Indian smokers, in particular, associated pills |

| Author, Year, Country                  | Study aims                                                                                                            | Setting                                                                   | Sample                                                                                                                    | Method         | Interview schedule/discussion guide                                                                                                | Type of analysis                            | Barriers to quitting                                                                                                                                                                                                                                                                                                                                                                                                                                                                                                                                                                                                                                                                                                                                                                                                                                                                                                                                                                                                                                           |
|----------------------------------------|-----------------------------------------------------------------------------------------------------------------------|---------------------------------------------------------------------------|---------------------------------------------------------------------------------------------------------------------------|----------------|------------------------------------------------------------------------------------------------------------------------------------|---------------------------------------------|----------------------------------------------------------------------------------------------------------------------------------------------------------------------------------------------------------------------------------------------------------------------------------------------------------------------------------------------------------------------------------------------------------------------------------------------------------------------------------------------------------------------------------------------------------------------------------------------------------------------------------------------------------------------------------------------------------------------------------------------------------------------------------------------------------------------------------------------------------------------------------------------------------------------------------------------------------------------------------------------------------------------------------------------------------------|
|                                        |                                                                                                                       |                                                                           |                                                                                                                           |                |                                                                                                                                    |                                             | with Western medicine, and viewed them with scepticism.                                                                                                                                                                                                                                                                                                                                                                                                                                                                                                                                                                                                                                                                                                                                                                                                                                                                                                                                                                                                        |
| Gould et al, 2013<br><br>AUS           | Explore issues for pregnant ATSI women in terms of smoking and smoking in the household                               | Regional NSW, Australia<br>Aboriginal maternal and infant health service. | 18 Aboriginal and/or Torres Strait Islander peoples (83% female)<br>Mean age: 30.3 (SD = 11.70)<br>Age range: 17-53 years | 5 focus groups | Experiences of and attitudes towards smoking during pregnancy and cessation                                                        | Content analysis                            | Smoking usual in families.<br>Several smokers in one household, difficult to avoid being around smoke.<br>Smoking provides sense of social connection.<br>Isolation if attempting to quit.<br>Shared activity, and an anticipated part of mutual exchange (socialising).<br>Low levels of support from family and friends to quit.<br>Pressure to quit from family and friends.<br>Pregnancy specific barriers: offset diabetes or keep baby small.<br>Babies and individuals turned out "healthy".<br>Not receiving understanding from doctors (judgemental).<br>Stress and anxious situations.<br>Cravings and withdrawal symptoms.<br>Meal times and work breaks (habit).<br>Yarning and socialising.<br>Sporting events, watching TV, boredom, TV ads, drinking alcohol and smelling tobacco smoke.<br>Smoking cannabis.<br>Being around other smokers, after birth.<br>Quitting "too hard".<br>Negative views of NRT due to adverse effects, preference to quit unaided, didn't understand how NRT could help.<br>Hopelessness after trying many methods. |
| Gryczynski et al 2010 (81).<br><br>USA | Inform the development of a culturally appropriate smoking cessation program for American Indians by looking at their | Local community-based American Indian health service organization         | n = 35 American Indian participants.<br>51.4% female<br>Age: 45.7% between ages of 41 – 50.                               | Focus groups.  | Cultural and social factors associated with smoking; smoking cessation experiences; attitudes towards cessation aids and programs. | Variant of the thematic framework approach. | Values of self-reliance and pride that are intertwined with American Indian identity.<br>Enjoyment of smoking.<br>Addiction to nicotine (deeply entrenched learned behaviour).<br>Linked to very heavy smoking behaviours (waking up during the night to smoke).<br>Association between other behaviours and smoking (coffee, alcohol, sex, other drug use).                                                                                                                                                                                                                                                                                                                                                                                                                                                                                                                                                                                                                                                                                                   |

1  
2  
3  
4  
5  
6  
7  
8  
9  
10  
11  
12  
13  
14  
15  
16  
17  
18  
19  
20  
21  
22  
23  
24  
25  
26  
27  
28  
29  
30  
31  
32  
33  
34  
35  
36  
37  
38  
39  
40  
41  
42  
43  
44  
45  
46  
47

| Author, Year, Country                | Study aims                                                                             | Setting                                                                        | Sample                                                    | Method                      | Interview schedule/discussion guide                                                                                         | Type of analysis                                   | Barriers to quitting                                                                                                                                                                                                                                                                                                                                                                                                                                                                                                                                                                                                                                                                                                                                                                                                                                                     |
|--------------------------------------|----------------------------------------------------------------------------------------|--------------------------------------------------------------------------------|-----------------------------------------------------------|-----------------------------|-----------------------------------------------------------------------------------------------------------------------------|----------------------------------------------------|--------------------------------------------------------------------------------------------------------------------------------------------------------------------------------------------------------------------------------------------------------------------------------------------------------------------------------------------------------------------------------------------------------------------------------------------------------------------------------------------------------------------------------------------------------------------------------------------------------------------------------------------------------------------------------------------------------------------------------------------------------------------------------------------------------------------------------------------------------------------------|
|                                      | preference for smoking cessation and associated programs.                              |                                                                                |                                                           |                             |                                                                                                                             |                                                    | Smoking as a form of stress relief (given the highly stressful nature of low socioeconomic status). Ubiquity of cigarette use in life, friends and family. While physicians were seen as a good source of smoking cessation help, it was noted that many AI do not have private health insurance. Also physicians were not seen for non-emergency care. Cost, incorrect use, ineffectiveness and negative side effects prevented use of NRT. High number of family friends also smokers.                                                                                                                                                                                                                                                                                                                                                                                 |
| Hodge et al 2006 (82).<br><br>USA.   | Investigate tobacco use, attitudes, knowledge and practices in American Indian sample. | Reservation sites.                                                             | n = 51 American Indian participants 56.9% female.         | Focus groups.               | History of tobacco use in tribal context, knowledge and attitudes regarding cigarette smoking.                              | Krueger's (1998) focus group analysis methodology. | Lenient attitudes towards smoking including: acceptance of smoking as a social norm; belief in autonomy and people's right to experiment with tobacco; and low numbers of household smoking bans. Cultural phenomenon of independence and non-interference. Reluctance to tell others what to do, or to move away from someone who begins to smoke. Low harm value assigned to smoking – in light of other day to day issues faced. Participants were aware of the risks but downplayed the seriousness of those risks. Enjoyment of smoking. Maintaining the ritual of smoking. Brand loyalty (several brands of tobacco that have AI names e.g. Seneca, Mohawk etc.). Ceremonial use of tobacco was an important cultural custom. Learning how to use tobacco in ceremonies as a young person was important. The loyalty to the tribe overrides tobacco's ill effects. |
| Johnston et al 2008 (83).<br><br>AUS | To gain a better understanding of the reasons why Indigenous Australians smoke.        | Health professional and community members from a coastal community in Northern | n = 25 Indigenous Australian community members 52% female | Semi-structured interviews. | Flexible interview schedule developed through literature review and discussions with service providers – details not given. | Thematic analysis.<br><br>Atlas-ti (Version 5).    | Social pressure to smoke – both implicit and explicit. Smoking is everywhere – smokers live or socialise with smokers. Tobacco as a normative substance in this community. Communal and collective activity. Tobacco used for reciprocal social exchange; ceremony and sharing.                                                                                                                                                                                                                                                                                                                                                                                                                                                                                                                                                                                          |

| Author, Year, Country               | Study aims                                                                                                                                                             | Setting                   | Sample                                                                           | Method        | Interview schedule/discussion guide                                                                                                                                                                                                          | Type of analysis   | Barriers to quitting                                                                                                                                                                                                                                                                                                                                                                                                                                                                                                                                                                                                                                                                                                                                                                                                                                                                                                                                                                                                                                                                                                                   |
|-------------------------------------|------------------------------------------------------------------------------------------------------------------------------------------------------------------------|---------------------------|----------------------------------------------------------------------------------|---------------|----------------------------------------------------------------------------------------------------------------------------------------------------------------------------------------------------------------------------------------------|--------------------|----------------------------------------------------------------------------------------------------------------------------------------------------------------------------------------------------------------------------------------------------------------------------------------------------------------------------------------------------------------------------------------------------------------------------------------------------------------------------------------------------------------------------------------------------------------------------------------------------------------------------------------------------------------------------------------------------------------------------------------------------------------------------------------------------------------------------------------------------------------------------------------------------------------------------------------------------------------------------------------------------------------------------------------------------------------------------------------------------------------------------------------|
|                                     |                                                                                                                                                                        | Territory.                |                                                                                  |               |                                                                                                                                                                                                                                              |                    | <p>Sharing was a very important part of Indigenous culture as a way to influence behaviour, relationships and social control.</p> <p>Refusing to share cigarettes may be seen as a betrayal of the kinship they share and as an offensive act.</p> <p>Not sharing cigarettes may lead to isolation, as the sharing of cigarettes contributes to a sense of belonging and social identity.</p> <p>Some participants were derided for their decision to quit (but others were supported).</p> <p>Some state that the only way they could quit smoking is to distance themselves from family and friends, an entirely unfeasible proposition.</p> <p>Sharing a cigarette gives opportunity for a 'yarn' – enjoyment.</p> <p>Other positive effects including feeling more alert, happy, good, more able to complete tasks, relief, and allowing a sense of control.</p> <p>Habit, addiction and hooked – nicotine dependence.</p> <p>Overcrowding in homes.</p> <p>Stress was most often mentioned in conjunction with smoking relapse, and more often by women than men.</p> <p>An outlet, a stress management, and to manage grief.</p> |
| Kaholokula et al, 2007 (84).<br>USA | Identify supports for and barriers to smoking cessation for this ethnic population., and to inform the development of a smoking cessation program for this population. | Northern rural community. | n = 52 Native Hawaiian participants.<br>48% male<br>Age: mean = 51.8 (SD = 12.4) | Focus groups. | Smoking cessation advice and experience; barriers and facilitators to cessation; preferences in smoking cessation programs; differences between males and females.<br><br>Ex-smokers were also asked about aids to quitting and preferences. | Thematic analysis. | <p>Social factors:<br/>presence of friends, family and co-workers who were smokers, nagging to quit smoking.</p> <p>Psychological factors:<br/>stress, negative emotions, lack of 'willpower', thinking about the need to smoke.</p> <p>Physical factors:<br/>physical experience on nicotine addiction and withdrawal, weight gain.</p> <p>Behavioural :<br/>habitual nature of smoking, smoking linked to other behaviours (alcohol, reading the paper).</p>                                                                                                                                                                                                                                                                                                                                                                                                                                                                                                                                                                                                                                                                         |

| Author, Year, Country               | Study aims                                                                                                                 | Setting                                                                                                    | Sample                                                                                                                                                                                 | Method                                            | Interview schedule/discussion guide                                                                                                             | Type of analysis  | Barriers to quitting                                                                                                                                                                                                                                                                                                                                                                                                                                                                                                                                                                                                                                                                                                                                                                                                                                                                                                                                                                                                                                                                                                                                                                                                                                                                                           |
|-------------------------------------|----------------------------------------------------------------------------------------------------------------------------|------------------------------------------------------------------------------------------------------------|----------------------------------------------------------------------------------------------------------------------------------------------------------------------------------------|---------------------------------------------------|-------------------------------------------------------------------------------------------------------------------------------------------------|-------------------|----------------------------------------------------------------------------------------------------------------------------------------------------------------------------------------------------------------------------------------------------------------------------------------------------------------------------------------------------------------------------------------------------------------------------------------------------------------------------------------------------------------------------------------------------------------------------------------------------------------------------------------------------------------------------------------------------------------------------------------------------------------------------------------------------------------------------------------------------------------------------------------------------------------------------------------------------------------------------------------------------------------------------------------------------------------------------------------------------------------------------------------------------------------------------------------------------------------------------------------------------------------------------------------------------------------|
| Passey et al 2011 (85).<br><br>AUS  | Explore the factors contributing to smoking initiation and the social context within which smoking behaviour occurs.       | Coastal, river region of NSW – Aboriginal Maternal and Infant Health Strategy antenatal teams.             | n = 36<br>Aboriginal Australian participants.<br>100% female<br>Age (of women interview n = 22): mean = 24.9, ranged from 17 to 41.<br>Education: Less than ten years of education 68% | 3 Focus groups and 22 semi-structured interviews. | Topic areas – social and environmental factors that maintained or encouraged smoking and smoking initiation.                                    | Content analysis. | Colonisation and introduction of tobacco:<br>Disruption to Aboriginal society including dispossession of traditional lands, removal of children, loss of traditional lifestyle and introduction of new substances.<br>The traditional and ceremonial limits that used to apply to smoking are no longer applicable.<br>Social networks and community norms:<br>Aboriginal community remains largely isolated.<br>Many aboriginal people have limited interaction with non-smokers.<br>High prevalence of smoking which allows the normalisation of smoking to occur.<br>Limited interaction with non-smokers also limits exposure to changing attitude towards smoking.<br>Disadvantaged lives:<br>High unemployment, associated poverty, affordable housing, overcrowding, relationship difficulties, loss of family members through death/removal of children, grief and loss, abuse, perceived racism and negative stereotypes –smoking helped manage and navigate their way through these factors.<br>Maintaining relationships and sharing:<br>Relationships may be given higher priority over individual needs.<br>Reciprocity – obligations to share time and resources including cigarettes – to give and to accept those given to you.<br>Sharing and having a yarn was an important social activity. |
| Patten et al, 2009 (86).<br><br>USA | Preferences and acceptability of different tobacco cessation strategies and the barriers and unmet needs of Alaskan Native | 3 remote villages on the coast of western Alaska (populations ranging from 750 to 1,000)<br>Most residents | n = 49 Alaskan Native participants<br>61% female<br>Age: mean = 14.6 (SD = 1.6).                                                                                                       | Focus groups.                                     | Motives for quitting, barriers to quitting, role of family members and others in quitting, preference for tobacco cessation methods, preference | Content analysis. | Cravings.<br>Use as a stress/anger management.<br>Use of traditional forms of tobacco.<br>Manages mood.<br>Relieves boredom.<br>High prevalence and acceptance of tobacco use in villages<br>Lack of encouragement by peers and other community                                                                                                                                                                                                                                                                                                                                                                                                                                                                                                                                                                                                                                                                                                                                                                                                                                                                                                                                                                                                                                                                |

| Author, Year, Country               | Study aims                                                                                                                                           | Setting                                         | Sample                                                                                                                           | Method                                | Interview schedule/discussion guide                                                                                                           | Type of analysis                            | Barriers to quitting                                                                                                                                                                                                                                                                                                                                                                                                                                                                                                      |
|-------------------------------------|------------------------------------------------------------------------------------------------------------------------------------------------------|-------------------------------------------------|----------------------------------------------------------------------------------------------------------------------------------|---------------------------------------|-----------------------------------------------------------------------------------------------------------------------------------------------|---------------------------------------------|---------------------------------------------------------------------------------------------------------------------------------------------------------------------------------------------------------------------------------------------------------------------------------------------------------------------------------------------------------------------------------------------------------------------------------------------------------------------------------------------------------------------------|
|                                     | adolescents who want to quit smoking.                                                                                                                | live subsistence lifestyles.                    |                                                                                                                                  |                                       | for study recruitment and retention methods.                                                                                                  |                                             | members to stop.<br>Lack of effective resources to help quit                                                                                                                                                                                                                                                                                                                                                                                                                                                              |
| Wood et al 2008 (87).<br><br>AUS    | The aim of this study was to explore the experience of tobacco smoking and cessation within a pregnant Aboriginal and Torres Strait Islander sample. | Perth (State capital), Western Australia.       | n = 40<br>Aboriginal women and 10<br>Aboriginal Health Workers<br>Age: ranged from 14 to 50 years, with most less than 30 years. | Focus groups and in-depth interviews. | A semi-structured discussion guide with open-ended questions was developed in consultation with the reference group.                          | Thematic analysis.<br><br>QSR N6<br>NUDIST. | Smoking as an accepted behaviour.<br>Stress management.<br>Low priority in terms of health.<br>Stress.<br>Difficult life circumstances.<br>Relaxation, chance to catch up with others.<br>Pregnancy acted as a barrier as it increased boredom/stress.<br>High levels of smoking amongst friends, family and wider community.<br>To quit you would have to avoid family and friends.<br>Knowledge about the specific risks to the foetus was low.<br>References to babies being healthy despite smoking during pregnancy. |
| <b>Mental illness</b>               |                                                                                                                                                      |                                                 |                                                                                                                                  |                                       |                                                                                                                                               |                                             |                                                                                                                                                                                                                                                                                                                                                                                                                                                                                                                           |
| Clancy et al, 2013 (102)<br><br>AUS | Explore experiences of smokers with self-reported depression                                                                                         | Large cluster randomized control study          | n = 16                                                                                                                           | Semi-structured interviews.           | Semi-structured interview<br>Attitude towards smoking, relationship between smoking and mental health, quitting process.                      | Thematic analysis.<br><br>nVivo 9.          | Low mood.<br>Sense of hopelessness.<br>Lack of control over one's life.<br>Lack of meaningful activities.                                                                                                                                                                                                                                                                                                                                                                                                                 |
| Davis et al 2010 (89).<br><br>USA   | Investigate how people with severe mental illness perceive risks from smoking/risks posed by smoking.                                                | Large urban psychosocial rehabilitation agency. | n = 31<br>54% female<br>Ethnicity:<br>54.8%<br>Caucasian;<br>35% African<br>American                                             | Semi-structured interviews.           | General health and healthy lifestyle questions, smoking status, smoking history, quit attempts and barriers to and facilitators of cessation. | Inductive data analysis.<br><br>Atlas-ti.   | Enjoyment of smoking – pleasurable activity/coping mechanism.<br>Maintain good mental health.<br>Stress management.<br>Worried that without stress management of smoking: relapse, rehospitalisation, suicidal thoughts or suicide were possible.<br>Allowed people to manage other addictions.<br>Not experiencing symptoms of smoking related illness currently.<br>Smoking certain brands, types or flavours of cigarettes                                                                                             |

| Author, Year, Country             | Study aims                                                                                                       | Setting                                             | Sample                                                                                                                                                 | Method                      | Interview schedule/discussion guide                                                                                                                                                           | Type of analysis                    | Barriers to quitting                                                                                                                                                                                                                                                                                                                                                                                                                                                                                                                                                                                                                                                                                                     |
|-----------------------------------|------------------------------------------------------------------------------------------------------------------|-----------------------------------------------------|--------------------------------------------------------------------------------------------------------------------------------------------------------|-----------------------------|-----------------------------------------------------------------------------------------------------------------------------------------------------------------------------------------------|-------------------------------------|--------------------------------------------------------------------------------------------------------------------------------------------------------------------------------------------------------------------------------------------------------------------------------------------------------------------------------------------------------------------------------------------------------------------------------------------------------------------------------------------------------------------------------------------------------------------------------------------------------------------------------------------------------------------------------------------------------------------------|
|                                   |                                                                                                                  |                                                     |                                                                                                                                                        |                             |                                                                                                                                                                                               |                                     | because they are less likely to cause cancer.<br>Extreme trauma and negative life experiences act as a protective factor for smoking related illness – “I’ve made it through life this far, I don’t think I’ll get sick from smoking too” belief.<br>Examples of friends and family who are/were smokers and have never been ill.<br>Examples of friends/family who are not smokers who are still unhealthy.<br>Friends and family socialising and smoking at the same time.                                                                                                                                                                                                                                             |
| Howard et al 2012 (91).<br><br>UK | Investigate the specific barriers to smoking cessation faced by pregnant smokers.                                | Maternity and perinatal psychiatry services.        | n = 27<br>100% female<br>Age: mean = 29 (SD = 1.1), ranged from 17 – 41.<br>Ethnicity: 13 White; 4 Black African; 6 Black Caribbean and 4 Mixed/Other. | Semi-structured interviews. | Not reported.                                                                                                                                                                                 | Framework analysis.                 | Smoking used as a way of losing weight (for participants diagnosed with SMI and eating disorder).<br>Maintain good mental health.<br>Only occurring during manic/depressive cycles.<br>Fear that attempts to quit would increase symptoms of mental illness.<br>Prioritisation of mental health over smoking cessation by health professionals.<br>Social environment – family, partner and social network of peers – high prevalence of smoking and lack of support.<br>Accessibility of cigarettes.<br>Psychological and physical addiction to cigarettes.<br>Quit smoking services and resources: judgemental, lack of proactive follow up, lack of continuity of care, prioritisation of mental health over smoking. |
| Kerr et al 2013 (92).<br><br>UK   | To determine the principle barriers and facilitators to smoking cessation for people with mental health problems | Recruited from three Health Boards in Scotland, UK. | n = 27 participants with mental health problems<br>41% male<br>Age: median = 49, ranged from 30 to 60.<br>Diagnosis: 41% Schizophrenia/                | Semi-structured interviews. | Smoking history; positive and negative aspects of smoking perceived barriers and facilitators to smoking cessation; times when smoke more or less; impact of mental health problem on smoking | Framework analysis.<br><br>NVivo 8. | Socialising and habits of family and friends<br>Smoking as a calming agent; dealing with general stressors and anxiety linked to mental health problems.<br>Stopping smoking would mean loss of coping mechanism/support.<br>Maintain good mental health.<br>Deterioration in mental health increases need for smoking.<br>Stimulant effect helped overcome side effects from medications, in particular antipsychotics.<br>Habit and addiction (small numbers).                                                                                                                                                                                                                                                         |



| Author, Year, Country | Study aims                                                                                                                                                                                                                  | Setting                 | Sample                                                                                                                                                                                                        | Method                      | Interview schedule/discussion guide                                                                                                                                      | Type of analysis   | Barriers to quitting                                                                                                                                                                                                                                                                                                                                                                                                                                                                                                                                                                                                                                                                                                                                                                                                                                                                                                                                                                                                                                                                                                                                                                          |
|-----------------------|-----------------------------------------------------------------------------------------------------------------------------------------------------------------------------------------------------------------------------|-------------------------|---------------------------------------------------------------------------------------------------------------------------------------------------------------------------------------------------------------|-----------------------------|--------------------------------------------------------------------------------------------------------------------------------------------------------------------------|--------------------|-----------------------------------------------------------------------------------------------------------------------------------------------------------------------------------------------------------------------------------------------------------------------------------------------------------------------------------------------------------------------------------------------------------------------------------------------------------------------------------------------------------------------------------------------------------------------------------------------------------------------------------------------------------------------------------------------------------------------------------------------------------------------------------------------------------------------------------------------------------------------------------------------------------------------------------------------------------------------------------------------------------------------------------------------------------------------------------------------------------------------------------------------------------------------------------------------|
|                       |                                                                                                                                                                                                                             |                         | delusional disorder; 30% Affective disorder; 22% Schizoaffective disorder; 4% neurotic disorder and 4% neurotic-affective disorder.                                                                           |                             | and cessation                                                                                                                                                            |                    | Enjoyment.<br>Lacking motivation and confidence to give up.<br>Lack of support from health professionals – uncommon to raise issue of smoking, offer encouragement support to stop.<br>Some reports of professionals actively discouraging cessation attempts.                                                                                                                                                                                                                                                                                                                                                                                                                                                                                                                                                                                                                                                                                                                                                                                                                                                                                                                                |
| Lawn et al 2002 (93). | Describe the experience of mental health clients as they relate to smoking behaviour, the relationship of smoking behaviour to the course of their mental illness and its management and to their attempts to quit smoking. | Mental health services. | n = 24<br>50% female<br>Age: ranged from 25 – 63 years old.<br>Diagnosis: 6 chronic paranoid schizophrenia; 6 major depressive disorder; 6 bipolar affective disorder; and 6 borderline personality disorder. | Semi-structured interviews. | Cigarette use; quit history, use of NRT and other aids; meanings of smoking, attempts to quit, relationship between smoking and mental illness, experiences in hospital. | Thematic analysis. | Cigarettes as a symbol of control, fulfilling needs of: safety, reassurance, predictability, autonomy.<br>Allowed greater freedom to take part in social activity.<br>Promote more control – over symptoms, mood, and emotions.<br>Cigarettes used by staff as tools to reward, punish or control behaviour.<br>Smoking is the most effective means of avoiding relapse.<br>Smoking as freedom, rebellion and protest.<br>Little hope for recovery.<br>An alternative way out to taking direct action – suicide?<br>Enjoyment.<br>Compensation for losses in other areas of life.<br>Smoking to relieve physical symptoms of mental illness – while many of their symptoms could be described as withdrawal/cravings form cigarette, most attributed these to symptoms of relapse to MI.<br>Tools for decision making, clear thoughts, compartmentalise time, avoidance.<br>Relieve stress, anxiety, to relax.<br>Aid sleep, motivation, stabilise mood swings.<br>Identity as a smoker – companionship of cigarettes.<br>Families, friends, peers all smokers. Service providers and family condoning or colluding with their smoking.<br>Few participants thought they could be successful. |

| Author, Year, Country             | Study aims                                                                                    | Setting                                                                        | Sample                                                                                     | Method        | Interview schedule/discussion guide                                                                                                                           | Type of analysis                         | Barriers to quitting                                                                                                                                                                                                                                                                                                                                                                                                                                                                                                                                              |
|-----------------------------------|-----------------------------------------------------------------------------------------------|--------------------------------------------------------------------------------|--------------------------------------------------------------------------------------------|---------------|---------------------------------------------------------------------------------------------------------------------------------------------------------------|------------------------------------------|-------------------------------------------------------------------------------------------------------------------------------------------------------------------------------------------------------------------------------------------------------------------------------------------------------------------------------------------------------------------------------------------------------------------------------------------------------------------------------------------------------------------------------------------------------------------|
|                                   |                                                                                               |                                                                                |                                                                                            |               |                                                                                                                                                               |                                          | Few participants had tried NRT, citing cost as the main barrier.<br>Excluded from mainstream quit programmes.<br>Misunderstood and judged, double dose of stigma from smoking policy changes.                                                                                                                                                                                                                                                                                                                                                                     |
| Lucksted et al 2000 (94).<br>USA. | Explore pros and cons of smoking and quitting smoking in psychosocial rehabilitation clients. | One urban and one suburban psychosocial rehabilitation groups.                 | n = 40<br>70% male<br>Demographic characteristics (including diagnosis) were not assessed. | Focus groups. | Semi-structured discussion guide: Positive and negative things about quitting, barriers and facilitators to quitting, other issues.                           | Thematic analysis.                       | The positive anti-depressive, anti-anxiety, calming, and cognitive-focusing effects of tobacco.<br>Symptom management (symptoms of mental illness and also side effects from medications).<br>Boredom.<br>Enjoyment<br>Others beliefs – friends and family encouraging smoking as it was perceived to be one of few positive things in the individual's life.<br>Ignoring health effects and health campaigns or accepting the risks.<br>Lack of motivation.<br>Smoking offered sense of identity and feeling included.                                           |
| Morris et al 2009 (95).<br>USA.   | To explore the perceptions of clients and staff on how best to quit smoking.                  | Consumers of mental health services in both rural and urban areas of Colorado. | n = 62                                                                                     | Focus groups. | Preferences for smoking cessation, views on current resources available, health professional practices that aid in cessation, factors that prevent cessation. | Content analysis.<br>NVivo 7.            | Lack of resources to aid in cessation.<br>Seeing health professionals smoking had a negative impact on participants' motivation to quit.<br>Earning smoking as a behavioural reward.<br>Negative expectations of the ability of people with a mental illness to quit smoking.<br>Little knowledge of the negative health effects of cigarette smoking.<br>Smoking to manage stress/anxiety/tension, psychiatric symptoms, and to enhance cognitive ability.<br>Boredom.<br>Smoking viewed as a social event, as a way of connecting with others.<br>Peer smoking. |
| Nawaz et al 2012 (96).            | To explore the smoking and quitting beliefs, attitudes and behaviours amongst smokers         | Large psychiatric rehabilitation agency in Chicago, Illinois.                  | n = 36<br>Ethnicity: 17 African American; 12 Latino; 7 White.                              | Focus groups. | Not reported.                                                                                                                                                 | Qualitative analysis.<br>Atlas.ti.5.7.1. | Tobacco use promoted, normalized and reinforced in mental health treatment community.<br>Smoking ameliorated illness symptoms and memories of traumatic experiences.<br>Manage daily stress that might otherwise aggravate mental illness symptoms.                                                                                                                                                                                                                                                                                                               |

| Author, Year, Country             | Study aims                                                                                                                                     | Setting                                                            | Sample                                                                                                                                                         | Method                      | Interview schedule/discussion guide                                                                                                                                                       | Type of analysis              | Barriers to quitting                                                                                                                                                                                                                                                                                                                                                                    |
|-----------------------------------|------------------------------------------------------------------------------------------------------------------------------------------------|--------------------------------------------------------------------|----------------------------------------------------------------------------------------------------------------------------------------------------------------|-----------------------------|-------------------------------------------------------------------------------------------------------------------------------------------------------------------------------------------|-------------------------------|-----------------------------------------------------------------------------------------------------------------------------------------------------------------------------------------------------------------------------------------------------------------------------------------------------------------------------------------------------------------------------------------|
| USA                               | with severe mental illness from three different race/ethnicity groups.                                                                         |                                                                    | Diagnosis:<br>14.3 – 33.3% Schizophrenia/<br>Schizo-affective; 14.3 – 23.5% bipolar depression;<br>35.3 – 50% Major depression;<br>11.8 – 28.6% not specified. |                             |                                                                                                                                                                                           |                               | Smoking norm amongst peers in treatment settings – highly prevalent.<br>Use of cigarettes to manage/reward behaviour.<br>Policies that prohibited smoking in only parts of treatment centres/halfway houses etc.<br>Difficulty of quitting<br>Lack of access to treatment – directly linked to poor health insurance and poverty.<br>Financial cost of NRT and other pharmacotherapies. |
| Prochaska et al 2013 (103)<br>USA | Aimed to obtain formative data to guide development of a tobacco cessation smoking program for youth with co-occurring mental health disorders | Outpatient mental health settings in the san Francisco bay area.   | n = 14<br>43% female.<br>Between ages of 16 – 23.                                                                                                              | Semi-structured interviews. | Semi-structured interviews: reasons for smoking, perceived relationship between tobacco use and mental health issues, perceptions of smoking and preferences for program characteristics. | Content analysis.<br>ATLAS.ti | Failure to enforce no smoking ban in the home<br>Parental smoking<br>Peers who smoke being a negative influence<br>Difficulty maintaining relationships if quit smoking<br>Stress<br>Affect<br>Other substances<br>Addiction<br>Media images                                                                                                                                            |
| Ratschen et al 2010 (105)<br>UK   | To explore patients' experience, smoking behaviour and symptoms of nicotine withdrawal in the                                                  | Two acute mental health wards and one ten bed intensive care unit. | n = 15<br>60% male<br>Mean age: 42.3 (ranged from 27 – 61).<br>Mental illness diagnoses: Schizophrenia,                                                        | Semi-structured interviews. | Current smoking behaviour, their individual experience, knowledge, beliefs, and feelings related to smoking, quitting smoking,                                                            | Framework analysis.           | Dealing with stress.<br>Dealing with boredom.<br>Habit.<br>Enjoyment.<br>Anxiety.<br>Peer pressure.<br>NRT use:<br>Disliked the taste of nicotine gum, reported allergic                                                                                                                                                                                                                |

1  
2  
3  
4  
5  
6  
7  
8  
9  
10  
11  
12  
13  
14  
15  
16  
17  
18  
19  
20  
21  
22  
23  
24  
25  
26  
27  
28  
29  
30  
31  
32  
33  
34  
35  
36  
37  
38  
39  
40  
41  
42  
43  
44  
45  
46  
47

| Author, Year, Country               | Study aims                                                                                     | Setting                                                                                                                                                                                        | Sample                                                                                                                                                    | Method        | Interview schedule/discussion guide                                                                                                                | Type of analysis                                   | Barriers to quitting                                                                                                                                                                                                                                                                                                                                                                                                                                                                                                                                                                                                                                                                                                                                                                                                                                                                                                                                                                                                                                        |
|-------------------------------------|------------------------------------------------------------------------------------------------|------------------------------------------------------------------------------------------------------------------------------------------------------------------------------------------------|-----------------------------------------------------------------------------------------------------------------------------------------------------------|---------------|----------------------------------------------------------------------------------------------------------------------------------------------------|----------------------------------------------------|-------------------------------------------------------------------------------------------------------------------------------------------------------------------------------------------------------------------------------------------------------------------------------------------------------------------------------------------------------------------------------------------------------------------------------------------------------------------------------------------------------------------------------------------------------------------------------------------------------------------------------------------------------------------------------------------------------------------------------------------------------------------------------------------------------------------------------------------------------------------------------------------------------------------------------------------------------------------------------------------------------------------------------------------------------------|
|                                     | context of a comprehensive smokefree policy on mental health acute wards.                      |                                                                                                                                                                                                | schizotypal disorders (n = 5); mood and affective disorders (n = 7); neurotic, stress related and somatoform disorders (n = 1); organic disorder (n = 1). |               | the smoke-free policy and the environment of the wards; the support offered to them on the wards; and their potential interest in further support. |                                                    | skin reactions to patches, and, for one participant, a fear of NRT.<br>Negative reactions to taking additional medication on top of that for their mental illness                                                                                                                                                                                                                                                                                                                                                                                                                                                                                                                                                                                                                                                                                                                                                                                                                                                                                           |
| Snyder et al 2008 (97).<br><br>USA. | Identify multi-level factors that impact on smoking cessation with people with mental illness. | Two psychiatric rehabilitation centres within the mid-west of the USA. One dual diagnosis, one offering rehabilitation services for predominantly African American people with mental illness. | n = 25<br>75% male<br>Aged between 24 and 55.<br>Diagnoses not reported.                                                                                  | Focus groups. | Views and perspectives on smoking and cessation, factors that acted as motivators for smoking, factors that motivated cessation.                   | Iterative analysis process.<br><br>QSR NUDI*ST N4. | Low confidence in quitting.<br>Desire to smoke was stronger than desire to quit.<br>NRT seen as ineffective leading to feelings of hopelessness.<br>Sense of autonomy over behaviour; participants felt that making the choice to smoke was empowering.<br>Conversely, a sense of having no control over smoking due to addiction was also a barrier.<br>Smoking as a central part of life.<br>Coping mechanism for stress, anxiety, depression, boredom and loneliness.<br>Cigarettes were an affordable luxury.<br>Being able to purchase cigarettes was a source of self-esteem.<br>Belief that if they quit, they would have nothing else enjoyable to do.<br>Beliefs around the health effects of smoking:<br>Participants reported health benefits from smoking and minimised health risks.<br>Non-smokers are able to refrain from smoking because they are not disadvantaged.<br>Belief that non-smokers don't have as much fun.<br>Feeling judged or nagged by non-smokers.<br>Smoking offering opportunity for connection and social interaction. |

| Author, Year, Country            | Study aims                                                                                            | Setting                                                | Sample                                                                                                                                | Method                      | Interview schedule/discussion guide                                     | Type of analysis                                                                    | Barriers to quitting                                                                                                                                                                                                                                                                                                                                                                                                                                                                                                                                                                                                                                                                                                                                                                                                                                                                                                                         |
|----------------------------------|-------------------------------------------------------------------------------------------------------|--------------------------------------------------------|---------------------------------------------------------------------------------------------------------------------------------------|-----------------------------|-------------------------------------------------------------------------|-------------------------------------------------------------------------------------|----------------------------------------------------------------------------------------------------------------------------------------------------------------------------------------------------------------------------------------------------------------------------------------------------------------------------------------------------------------------------------------------------------------------------------------------------------------------------------------------------------------------------------------------------------------------------------------------------------------------------------------------------------------------------------------------------------------------------------------------------------------------------------------------------------------------------------------------------------------------------------------------------------------------------------------------|
|                                  |                                                                                                       |                                                        |                                                                                                                                       |                             |                                                                         |                                                                                     | Boredom; days left relatively unstructured so smoking filled in the time.                                                                                                                                                                                                                                                                                                                                                                                                                                                                                                                                                                                                                                                                                                                                                                                                                                                                    |
| Solway et al, 2011 (98).<br>USA. | Explore the perceptions of people with mental illness on smoking and smoking cessation.               | Outpatient mental health services                      | n = 26<br>38% female<br>Mean age: 62 (ranged from 41 – 82).<br>Nearly all participants had been diagnosed with severe mental illness. | Focus groups.               | Semi-structured interview protocol.                                     | Constructivist grounded theory.                                                     | Perceived benefits of smoking outweigh the negative health risks.<br>Enjoyment.<br>Relaxation.<br>Experience cravings when feeling anxious or upset or in the company of other smokers.<br>Sense of control over emotions.<br>Feeling extremely daunted about the quit process and withdrawal symptoms in general.<br>Cost and accessibility of NRT.<br>Lack of willpower, motivation and the right frame of mind.<br>Smoking provides an identity and also acts as a source of connectedness over the sense of exclusion/stigma of having mental illness.<br>Freedom, exercise their right to choose and maintain independence.<br>Smoking as a 'friend'.<br>Symptom management.<br>Continued smoking eliminates withdrawal symptoms.<br>Other's expectations of their ability to quit smoking.<br>Feeling that smoking and medications to treat mental illness are related. Smoking to relieve side effects of medication.<br>Weight gain. |
| Tsourtos et al 2008 (99).<br>AUS | Explore why non-smokers appear to be resilient to smoking in a highly acceptable and prevalent group. | General practice and a range of mental health services | n = 34<br>58% female<br>All had diagnoses of depression.                                                                              | Semi-structured interviews. | Smoking and participants' social environment throughout the lifecourse. | Components of Grounded Theory were used with an analytic framework.<br><br>NVivo 8. | Smoking to deal with stress:<br>Stressors included: boredom; physical injury; death of a loved one; stressful occupation; relationship breakdown; one or more medically diagnosed disorders.<br>Coping mechanism.<br>Relaxation.<br>Comfort.<br>Strength.<br>Quitting smoking would exacerbate stress.<br>Depression and anxiety made quitting more difficult.                                                                                                                                                                                                                                                                                                                                                                                                                                                                                                                                                                               |

| Author, Year, Country                  | Study aims                                                                                                     | Setting                                                                   | Sample                                                                                                                                                                        | Method                   | Interview schedule/discussion guide                                                                                                     | Type of analysis                                                                  | Barriers to quitting                                                                                                                                                                                                                                                                                                                                                                                                                                                                                                                                                                                                                                                                                                               |
|----------------------------------------|----------------------------------------------------------------------------------------------------------------|---------------------------------------------------------------------------|-------------------------------------------------------------------------------------------------------------------------------------------------------------------------------|--------------------------|-----------------------------------------------------------------------------------------------------------------------------------------|-----------------------------------------------------------------------------------|------------------------------------------------------------------------------------------------------------------------------------------------------------------------------------------------------------------------------------------------------------------------------------------------------------------------------------------------------------------------------------------------------------------------------------------------------------------------------------------------------------------------------------------------------------------------------------------------------------------------------------------------------------------------------------------------------------------------------------|
| <b>Homeless</b>                        |                                                                                                                |                                                                           |                                                                                                                                                                               |                          |                                                                                                                                         |                                                                                   |                                                                                                                                                                                                                                                                                                                                                                                                                                                                                                                                                                                                                                                                                                                                    |
| Okuyemi et al 2006 (108).<br><br>USA.  | Examine the views of homeless people on smoking practices, knowledge and barriers to and interest in quitting. | Homeless service facilities                                               | n = 62<br>68% response rate<br>70% male<br>Ethnicity: 58% black; 37% white and 5% other.<br><br>Age: mean = 41.5 (SD = 9.3).<br>Education: 73% high school educated or lower. | Focus groups.            | Smoking history; quitting experiences; smoking cessation aids (NRT and other medications); preferences for smoking cessation treatment. | Principles outlined by Morgan and Krueger.<br><br>Atlas-ti v 4.1 used for coding. | Low self-efficacy.<br>Limited access to care (cost of cessation aids).<br>Service providers offer limited support to quit.<br>Competing needs e.g. food, shelter.<br>Uncertainty associated with being homeless.<br>Limited structure and routine – keeping busy to avoid boredom.<br>Smoking as a socially acceptable behaviour in homeless settings.<br>Few restrictions in homeless services.<br>Fear that quitting smoking may result in changes in emotion/stress levels that may impact negatively on other areas of life.<br>Concerns about using NRT and cost, taste, proper usage and side effects, interactions with other medications and effect on other health conditions.<br>Concern about becoming addicted to NRT. |
| <b>Prisoners</b>                       |                                                                                                                |                                                                           |                                                                                                                                                                               |                          |                                                                                                                                         |                                                                                   |                                                                                                                                                                                                                                                                                                                                                                                                                                                                                                                                                                                                                                                                                                                                    |
| Richmond et al 2009 (110).<br><br>AUS. | Investigate tobacco and its role in prisons.                                                                   | One maximum security prison and one community justice restorative centre. | n = 40 (9 prisoners and 31 ex-prisoners).<br>30% female<br>Age: ranged from mid 20s to late 40s.<br>Ethnicity: 4 Aboriginal Australian participants                           | Focus groups.            | Role of tobacco in prisons, reasons for smoking initiation, smoking cessation, methods to quit.                                         | Content analysis.                                                                 | Poor knowledge of cessation strategies.<br>Some had not heard of bupropion, would not attend a doctor for assistance and would not attend quit smoking programs once in the community.<br>Smoking as a normal practice in prison.<br>Cigarettes as a substitute for money.<br>Boredom, stress, anxiety regarding legal matters, being locked up for large portions of the day and social isolation.<br>Cigarettes/smoking used as a reward.<br>Transfer to another wing or prison.<br>Bullying, missing family, isolation,                                                                                                                                                                                                         |
| <b>At risk youth</b>                   |                                                                                                                |                                                                           |                                                                                                                                                                               |                          |                                                                                                                                         |                                                                                   |                                                                                                                                                                                                                                                                                                                                                                                                                                                                                                                                                                                                                                                                                                                                    |
| Lewis et al 2013(111)                  | Aims to contribute to the existing literature                                                                  | Communities in North East of England –                                    | n = 52<br>58% female                                                                                                                                                          | Participant observation. | NA                                                                                                                                      | Thematic analysis.                                                                | Surrounded by other smokers makes it too hard to quit.<br>A lot of family and friends smoke<br>Helps with stress – conflicting messages – some                                                                                                                                                                                                                                                                                                                                                                                                                                                                                                                                                                                     |

| Author, Year, Country                       | Study aims                                                                                                                        | Setting                                                                                              | Sample                                                        | Method                      | Interview schedule/discussion guide                                                                         | Type of analysis    | Barriers to quitting                                                                                                                                                                                                                                                                                                                                                                                                                                                           |
|---------------------------------------------|-----------------------------------------------------------------------------------------------------------------------------------|------------------------------------------------------------------------------------------------------|---------------------------------------------------------------|-----------------------------|-------------------------------------------------------------------------------------------------------------|---------------------|--------------------------------------------------------------------------------------------------------------------------------------------------------------------------------------------------------------------------------------------------------------------------------------------------------------------------------------------------------------------------------------------------------------------------------------------------------------------------------|
| UK                                          | on smoking and young people and to clarify how factors related to young people and smoking play out in disadvantaged communities. | deindustrialisation – former coal mining village.                                                    | Aged between 11 to 18 years.                                  |                             |                                                                                                             |                     | participants felt it did and did not relieve stress.<br>For fun and enjoyment.<br>Accessibility and availability: tab (cigarette) houses – private dwellings where people can buy cigarettes- always sell to underage people.<br>Buying a packet from the tab houses and then selling at school.<br>Mixed messages regarding smoking: people in authority not discouraging or addressing smoking (e.g. teachers, police force).                                                |
| <b>Multiple groups</b>                      |                                                                                                                                   |                                                                                                      |                                                               |                             |                                                                                                             |                     |                                                                                                                                                                                                                                                                                                                                                                                                                                                                                |
| Garner et al 2013 (112)<br><br>UK<br><br>UK | Explore homeless smokers' views, attitudes, experiences and knowledge with regard to smoking and quitting in an urban UK setting. | One drug harm reduction and sexual health service commissioned by the NHS in Nottingham city centre. | n = 15<br>73% male<br>Aged between 18 to 53 years; mean = 33. | Semi-structured interviews. | Demographics, smoking history, nicotine dependence, quitting related behaviours, experiences and attitudes. | Framework analysis. | Low confidence.<br>High prevalence of peer smoking behaviour. Exposure to a social environment where smoking was the norm.<br>Homeless service staff providing cigarettes.<br>Use of cigarettes as a reward for carrying out small jobs around the service.<br>Use of other substances including alcohol and other drugs.<br>Stress management within already stressful life circumstances.<br>Lack of encouragement or active discouragement by health professionals to quit. |

1  
2  
3  
4  
5  
6  
7  
8  
9  
10  
11  
12  
13  
14  
15  
16  
17  
18  
19  
20  
21  
22  
23  
24  
25  
26  
27  
28  
29  
30  
31  
32  
33  
34  
35  
36  
37  
38  
39  
40  
41  
42  
43  
44  
45  
46  
47

Supplementary file 4. Summaries of the included mixed methods studies by disadvantaged group (n = 3).

| Author, Year, Country     | Study aims                                                                                           | Setting       | Sample                                                                                              | Response rate | Type of survey (cross-sectional, etc)                                               | Outcome measure (and info on survey instrument)                                                                                                                                                                                      | Qualitative method and type of analysis                                                      | Quantitative results (barrier and prevalence)                                                                                                                                                       | Qualitative data (barriers identified)                                                                                                                                                                                       |
|---------------------------|------------------------------------------------------------------------------------------------------|---------------|-----------------------------------------------------------------------------------------------------|---------------|-------------------------------------------------------------------------------------|--------------------------------------------------------------------------------------------------------------------------------------------------------------------------------------------------------------------------------------|----------------------------------------------------------------------------------------------|-----------------------------------------------------------------------------------------------------------------------------------------------------------------------------------------------------|------------------------------------------------------------------------------------------------------------------------------------------------------------------------------------------------------------------------------|
| <b>Indigenous studies</b> |                                                                                                      |               |                                                                                                     |               |                                                                                     |                                                                                                                                                                                                                                      |                                                                                              |                                                                                                                                                                                                     |                                                                                                                                                                                                                              |
| Glover, 2005 (79).<br>NZ. | Increase the understanding of smoking in Maori populations and best ways to affect smoking cessation | Not reported. | n = 130 self-identified Maori participants.<br>78% female.<br>Age: mean = 35 (ranged from 16 – 62). | Not reported. | Pre and post interviews after a quit attempt (both open and close ended questions). | Smoking history, Smoking behaviour, Quit history, Fagerstrom NDT, Experience of relapse, Reasons for smoking, Motivation to quit, Self-efficacy, Stage of Change, Methods of quitting, Quit abstinence – not biochemically verified. | Semi-structured interviews<br>General inductive approach.<br>QSR<br>NUD*IST<br>Release V4.0. | Habit: 73%<br>Normal to smoke: 11.5%<br>Coping with stress: 48%<br>Coping with emotions: 23%<br>Addiction: 39%<br>Socialising/drinking: 34%<br>Bored: 29%<br>Enjoyment: 25%<br>Time out/reward: 17% | Relapse was also related to poor self-esteem and a tendency to attribute blame to themselves.<br>Living with other smokers.<br>Family (Whanau) directly or indirectly supporting relapse.<br>Socialising.<br>Others smoking. |



| Author, Year, Country               | Study aims                                                                     | Setting                                                                        | Sample                                                                                                         | Response rate | Type of survey (cross-sectional, etc)  | Outcome measure (and info on survey instrument)                                                          | Qualitative method and type of analysis          | Quantitative results (barrier and prevalence)                                                                                                                                                                                                                               | Qualitative data (barriers identified)                                                                                                                                                                                                                                                                                                      |
|-------------------------------------|--------------------------------------------------------------------------------|--------------------------------------------------------------------------------|----------------------------------------------------------------------------------------------------------------|---------------|----------------------------------------|----------------------------------------------------------------------------------------------------------|--------------------------------------------------|-----------------------------------------------------------------------------------------------------------------------------------------------------------------------------------------------------------------------------------------------------------------------------|---------------------------------------------------------------------------------------------------------------------------------------------------------------------------------------------------------------------------------------------------------------------------------------------------------------------------------------------|
| <b>Mental illness studies</b>       |                                                                                |                                                                                |                                                                                                                |               |                                        |                                                                                                          |                                                  |                                                                                                                                                                                                                                                                             |                                                                                                                                                                                                                                                                                                                                             |
| Goldberg et al 1996 (90).<br>CAN    | Identify what clients identify as barriers and facilitators to cessation.      | Community based psychiatric rehabilitation program (mid-sized urban Canadian). | n = 105<br>68% male<br>Age: mean = 35 (ranged from 20 to 58 years).<br>Diagnoses not reported.                 | 93%           | Telephone and face to face interviews. | Reasons for smoking, why it is hard to quit, beliefs about support required to change smoking behaviour. | Focus groups.<br>Type of analysis not specified. | Addiction: 53%<br>Difficulty resisting cravings: 33%<br>Enjoyment: 20%<br>Relieving symptoms: 20%<br>Habit: 19%<br>Boredom: 17%<br>Most or all friends are smokers: 12.5%<br>Low cost of cigarettes: 8% to smoke, lack of support to quit.<br>Smoking as a social activity. | Afraid of giving up old friend. Withdrawal symptoms. Enhanced mood. Cheap thrill. Coping strategy when stressed. Something to do. Apathy and daily drudgery associated with psychiatric disability. Peer pressure to smoke. Lack of support from peers to quit. Smoking as a social activity. Receiving cigarettes from family and friends. |
| Van Dongen et al 1999 (100).<br>USA | Examine the experiences of persons with persistent mental illness and smoking. | Outpatient clinic, Midwest, USA.                                               | n = 36<br>75% male<br>Age: mean ranged from 45 to 49.<br>Diagnosis: Schizophrenia (70% - 90%); schizoaffective | Not reported  | Cross-sectional survey.                | Not reported.                                                                                            | Interviews.<br>Content analysis.                 | Habit and routine: 58%<br>Socialization: 58%<br>Relaxation: 42%<br>Addiction to nicotine: 33%                                                                                                                                                                               | Smoking provided structure and activity. Something to do. Way to deal with stress.                                                                                                                                                                                                                                                          |

1  
2  
3  
4  
5  
6  
7  
8  
9  
10  
11  
12  
13  
14  
15  
16  
17  
18  
19  
20  
21  
22  
23  
24  
25  
26  
27  
28  
29  
30  
31  
32  
33  
34  
35  
36  
37  
38  
39  
40  
41  
42  
43  
44  
45  
46  
47

| Author, Year, Country | Study aims | Setting | Sample                                                    | Response rate | Type of survey (cross-sectional, etc) | Outcome measure (and info on survey instrument) | Qualitative method and type of analysis | Quantitative results (barrier and prevalence) | Qualitative data (barriers identified) |
|-----------------------|------------|---------|-----------------------------------------------------------|---------------|---------------------------------------|-------------------------------------------------|-----------------------------------------|-----------------------------------------------|----------------------------------------|
|                       |            |         | tive and mood disorders were the other diagnoses present. |               |                                       |                                                 |                                         |                                               |                                        |

## Supplementary file 5. Overview of study characteristics

### Study characteristics

Approximately half (52%) of the studies had been published from 2009 onwards. Apart from three studies (86, 103, 111), all participants were adults aged 18 years and over. Studies were carried out in the USA (n=29) (49, 51, 54, 56, 60, 66, 70, 72, 73, 76, 78, 81, 82, 84, 86, 88, 89, 94-98, 100, 101, 103, 104, 106-108); Australia (n=15) (29, 52, 55, 57, 68, 74, 75, 80, 83, 85, 87, 93, 99, 102, 110); the United Kingdom (n=13) (50, 53, 61, 62, 67, 69, 71, 91, 92, 105, 109, 111, 112); Canada (n=5), New Zealand (n=2) (77, 79) and France (n=1) (59). Qualitative (n=54) (29, 49-59, 61-69, 71-78, 80-87, 89, 91-99, 102, 103, 105, 108, 110-112); quantitative (n=8) (26, 60, 70, 88, 101, 106, 107, 109) and mixed method studies (n=3) (79, 90, 100) were included. Of the qualitative studies, 26 used focus group methods (29, 49, 51, 52, 54-56, 61, 62, 65, 66, 72, 73, 76-78, 80-82, 84, 86, 94, 96, 97, 108, 110); 19 used interviews (50, 53, 57-59, 67, 69, 71, 75, 83, 89, 91-93, 99, 102, 103, 105, 112) and eight used a combination of interviews and focus groups (63, 64, 68, 74, 85, 87, 95, 98). One qualitative paper used participant observation methods (111). All eight quantitative studies utilised cross-sectional survey methods (26, 60, 70, 88, 101, 106, 107, 109). Two mixed methods studies used both cross-sectional surveys and interview ((79, 100) and one mixed methods study used cross-sectional surveys and focus groups (90). Twelve studies included only female participants (53, 54, 56, 58, 63-65, 67, 76, 85, 87, 91), five of which were carried out with pregnant women (54, 58, 67, 87, 91). Two studies were carried out with men only; partners of women who were pregnant (57) and disadvantaged former miners (71).

### Quality assessment of qualitative studies

This figure includes assessment of the qualitative components of the mixed methods studies. The majority of studies did not explicitly state their study design (n = 42); of those that did, most used Grounded Theory (57, 59, 61, 93, 98, 99). Most studies provided adequate descriptions of the study sites; participants; data collection methods and analysis techniques. Only a small number of studies (n = 11) (51, 54, 58, 75, 76, 78, 83, 84, 96, 111, 112) addressed the role of the relationship between participants and the researcher and fewer still identified potential assumptions and biases of the researcher (n = 5) (51, 54, 61, 83, 98). Studies generally performed poorly when assessed on four components of trustworthiness, with only 17 studies meeting all four criteria (credibility; transferability; dependability and confirmability) (49, 52, 56, 58, 65, 67, 71, 73, 74, 77, 78, 80, 82, 83, 85, 86, 93). It should be

1  
2  
3 noted that none of the mixed methods studies explicitly described their methodology as  
4 mixed methods nor did they report integrating the qualitative and quantitative findings in a  
5 systematic way.  
6  
7

### 8 **Quality assessment of quantitative studies**

9  
10 The results of the quality assessment of quantitative studies are provided in  
11 Supplementary file 6. This table also provides assessment of the quantitative components of  
12 included mixed methods studies. Sample sizes in the quantitative studies ranged from 36 to  
13 500 participants. Response rates ranged from 42% to over 97% (four studies did not provide  
14 response rates) (79, 100, 104, 106). All but one study (90) clearly stated eligibility criteria.  
15  
16 The majority of studies adequately described the research aims (60, 70, 79, 88, 90, 101, 104,  
17 106, 107); source of participants(60, 88, 90, 100, 106, 107) and addressed potential sources of  
18 bias within their analysis (60, 88, 107, 109). All studies stated their outcome *a priori* and no  
19 conflicts of interest were identified. Eight studies used convenience sampling (88, 90, 100,  
20 101, 104, 106, 107, 109). The validity and reliability of survey measures used to assess  
21 barriers to cessation were reported in one study (60). Three studies employed techniques such  
22 as pilot testing and input from key stakeholders in developing the tools used (60, 70, 109).  
23  
24  
25  
26  
27  
28  
29  
30  
31  
32  
33  
34  
35  
36  
37  
38  
39  
40  
41  
42  
43  
44  
45  
46  
47  
48  
49  
50  
51  
52  
53  
54  
55  
56  
57  
58  
59  
60

## Number of studies meeting all criteria for quality assessment



Supplementary figure 6. Quality of included qualitative studies and qualitative components of mixed methods studies (n = 57)

## Supplementary file 7. Results of the quality assessment of quantitative studies and quantitative components of mixed methods studies

| Study author and year     | Aims | Selection methods    |                              |                                   | Was the measurement of variables appropriate? |                       |                          | Control of bias    |                            |                            | Was the use of statistics appropriate? |              | Conflict of interest |
|---------------------------|------|----------------------|------------------------------|-----------------------------------|-----------------------------------------------|-----------------------|--------------------------|--------------------|----------------------------|----------------------------|----------------------------------------|--------------|----------------------|
|                           |      | Aims clearly stated? | Eligibility criteria stated? | Source of participants described? | Selection method?                             | Validity of measures? | Reliability of measures? | Other method used? | Potential sources of bias? | Methods to deal with bias? | Response rate (%)?                     | Sample size? |                      |
| Price et al 1994 (60)     | ✓    | ✓                    | ✓                            | Random sampling                   | ✓                                             | ✓                     | ✓                        | ✓                  | ✗                          | 42                         | 500                                    | ✓            | ✓                    |
| Rosenthal et al 2013 (70) | ✓    | ✗                    | ✓                            | Random sampling                   | ✗                                             | ✗                     | ✓                        | ✓                  | ✗                          | 73                         | 350                                    | ✓            | ✓                    |
| Dickens et al 2005 (109)  | ✗    | ✓                    | ✓                            | Convenience sample                | ✗                                             | ✗                     | ✓                        | ✓                  | ✗                          | 44.1                       | 45                                     | ✓            | ✓                    |
| Connor et al 2002 (107)   | ✓    | ✓                    | ✓                            | Convenience sample                | ✗                                             | ✗                     | ✗                        | ✓                  | ✓                          | >97                        | 236                                    | ✓            | ✓                    |
| Asher et al 2003 (101)    | ✓    | ✓                    | ✓                            | Convenience sample                | ✗                                             | ✗                     | ✗                        | ✗                  | ✗                          | 73                         | 96                                     | ✓            | ✓                    |
| Carosella et al 1999 (88) | ✓    | ✓                    | ✓                            | Convenience sample                | ✗                                             | ✗                     | ✗                        | ✓                  | ✗                          | 80.9                       | 89                                     | ✓            | ✓                    |
| Orleans et al 1993(104)   | ✓    | ✗                    | ✓                            | Convenience sample                | ✗                                             | ✗                     | ✓                        | ✗                  | ✗                          | ✗                          | ✗                                      | ✓            | ✗                    |

| Study author and year      | Aims | Selection methods            |                                   |                     | Was the measurement of variables appropriate? |                          |                    | Control of bias            |                            |                    | Was the use of statistics appropriate? |                                  | Conflict of interest |
|----------------------------|------|------------------------------|-----------------------------------|---------------------|-----------------------------------------------|--------------------------|--------------------|----------------------------|----------------------------|--------------------|----------------------------------------|----------------------------------|----------------------|
|                            |      | Eligibility criteria stated? | Source of participants described? | Selection method?   | Validity of measures?                         | Reliability of measures? | Other method used? | Potential sources of bias? | Methods to deal with bias? | Response rate (%)? | Sample size?                           | Primary outcome stated a priori? |                      |
| Arnsten et al 2004(106)    | ✓    | Y                            | ✗                                 | Convenience sample. | ✗                                             | ✗                        | ✗                  | ✗                          | ✗                          | ✗                  | 98                                     | ✓                                | ✓                    |
| Glover et al 2005 (79)     | ✓    | ✓                            | ✗                                 | Not reported        | ✗                                             | ✗                        | ✗                  | ✗                          | ✗                          | ✗                  | 130                                    | ✓                                | ✓                    |
| Van Dongen et al 1999(100) | ✗    | ✓                            | ✓                                 | Convenience sample  | ✓                                             | ✗                        | ✗                  | ✗                          | ✗                          | ✗                  | 36                                     | ✓                                | ✓                    |
| Goldberg et al 1996(90)    | ✓    | ✓                            | ✓                                 | Convenience sample  | ✗                                             | ✗                        | ✗                  | ✗                          | ✗                          | 93                 | 105                                    | ✓                                | ✓                    |

1  
2  
3  
4  
5  
6  
7  
8  
9  
10  
11  
12  
13  
14  
15  
16  
17  
18  
19  
20  
21  
22  
23  
24  
25  
26  
27  
28  
29  
30  
31  
32  
33  
34  
35  
36  
37  
38  
39  
40  
41  
42  
43  
44  
45  
46  
47  
48  
49  
50  
51  
52  
53  
54  
55  
56  
57  
58  
59  
60

Supplementary file 8: Detailed summary of barriers identified

## **Individual & lifestyle factors**

### ***Relaxation, stress and mood management***

Forty qualitative studies identified stress management as a significant barrier to smoking cessation (50-56, 58, 59, 61-63, 65, 67-69, 72, 74, 75, 80, 81, 83, 84, 86, 87, 89, 90, 92, 93, 95-97, 99, 100, 103, 105, 108, 110-112). Smoking was used as a coping mechanism (52, 58, 62-65, 69, 74, 89, 90, 92, 97, 99) in reaction to daily stressors as well as the stress inherent in disadvantaged lives. Three quantitative studies reported stress management as a barrier to quitting with Maori participants (48%) (79), participants with substance use disorders (39%) (104) and homeless participants (44%) (107). Of note, participants in two studies reported that smoking also directly contributed to the stress experienced by participants (51, 111).

Participants also reported using smoking to manage their emotions and mood (58, 65, 72, 83, 84, 90, 93, 98, 103, 113). Twenty three percent of participants from a Maori sample indicated managing emotions was a barrier to quitting (79), 42% of individuals with a substance use disorder (101).

### ***Enjoyment of smoking***

Across 22 studies, smoking was described as an enjoyable activity (50, 55, 56, 59, 62, 63, 65, 67, 79, 81-83, 88-90, 92-94, 97, 98, 105, 111). In quantitative studies, proportions of participants who said enjoyment prevented them from quitting ranged from 25% (79) to 47.2% (88). Smoking was viewed as an affordable, rewarding luxury (50, 55, 63, 79, 93, 97) and the only pleasurable activity some participants had (50, 56, 59, 62, 65).

### ***Physical addiction to nicotine***

Addiction to nicotine was reported as a barrier in 15 qualitative studies (49, 50, 54, 59, 67-69, 72, 74, 75, 81, 83, 84, 91, 92) (103) and four quantitative studies (60, 79, 90, 100).

Proportions of individuals who reported addiction to nicotine as a barrier ranged from 33% (100) to 86% (60). The experience of withdrawal symptoms was a barrier to quitting in nine studies (54, 57, 69, 72, 74, 80, 84, 90, 98). Management of cravings was a barrier in ten qualitative studies (49, 54, 68, 69, 72, 80, 84, 86, 90, 98) and one quantitative study (107) where 50% of homeless participants cited cravings as a barrier to cessation. Withdrawal symptoms were especially a barrier for individuals with substance use disorder, with 87% feeling tense or irritable if they quit smoking, and 48% saying their cravings would be so strong they couldn't stand it (101).

### ***Behavioural habit of smoking***



1  
2  
3  
4  
5  
6  
7  
8  
9  
10  
11  
12  
13  
14  
15  
16  
17  
18  
19  
20  
21  
22  
23  
24  
25  
26  
27  
28  
29  
30  
31  
32  
33  
34  
35  
36  
37  
38  
39  
40  
41  
42  
43  
44  
45  
46  
47  
48  
49  
50  
51  
52  
53  
54  
55  
56  
57  
58  
59  
60

Five quantitative studies (60, 79, 88, 90, 100) and ten qualitative studies (50, 57, 65, 68, 75, 80, 83, 84, 92, 105) reported habit as a barrier to smoking. Proportions of participants who endorsed habit as a barrier ranged from 19% to 58% in studies carried out with people with a mental illness (88, 90, 100); 82% in a low income sample (60) and 73% in a study conducted with Maori participants (79).

### ***Perceived mental health benefits of smoking***

Smoking in order to manage the symptoms of mental illness was identified in the majority of studies carried out with participants with a mental illness (88-98, 102) as well as managing the side effects from medications (92, 94, 98). Smoking in order to protect mental health was also found in one study conducted with low income pregnant women (67). In two community surveys a history of depression was reported as a barrier to smoking cessation (58, 74). Participants with mental illness in two studies perceived that the benefits of continuing to smoke far outweighed the potential risks of stopping, which included relapse, rehospitalisation and suicidal thoughts (89, 98). A large portion (78%) of individual's with substance use disorder would feel anxious if they tried to quit (101).

### ***Avoidance of weight gain***

Fourteen studies reported that smoking was used in weight management, and that potential weight gain was a barrier to quitting (29, 49, 52-54, 64, 67, 72, 74, 84, 91, 98, 101, 107). Twenty percent of homeless participants endorsed weight gain as a barrier to quitting (107) and in 20% of individual with substance use disorder (101). Smoking was also used to suppress appetite for individuals diagnosed with an eating disorder (91) and for low income pregnant women (67).

### ***Competing priorities and needs***

Competing needs, including finding shelter or food for those who were homeless (108); addressing mental health issues (89, 98); or addressing other physical illnesses (56, 74, 99) often meant that smoking cessation was not a priority for participants or those involved in their care in ten studies (56, 63, 74, 75, 87, 89, 91, 98, 99, 108).

### ***Rationalisations to continue smoking***

Lack of acknowledgement of the health-related harm of tobacco use was reported in eight studies (56, 58, 67, 74, 82, 87, 89, 97). Rationalisations to continue smoking were also reported in ten studies (54, 55, 58, 61, 67, 74, 78, 82, 89, 97) and included the belief that smoking certain brands/strengths of cigarettes meant a lower likelihood of developing cancer (82); not experiencing any signs or symptoms of smoking related illness at the present time (54, 58); fatalistic beliefs (56); providing examples of relatives or other persons who are

1  
2  
3 smokers and who are healthy (80, 87); and the experience of disadvantage as a protective  
4 factor against developing smoking related illness (89).

### 7 ***Other substance use***

8  
9 Participants identified associations between smoking and other behaviours in eight studies  
10 including alcohol use (49, 74, 76, 80, 84, 112) cannabis and caffeine (49, 81, 112).

11  
12 Approximately one third (34%) of Maori participants identified alcohol use as a barrier to  
13 quitting smoking(79). Smoking was used to manage other addictions and prevent relapse (59,  
14 89, 103). Alternatives to smoking included drug use, relapse to alcohol addiction and losing  
15 control; all of which were unacceptable to participants (56, 62, 89). For 41% of those  
16 diagnosed with a substance use disorder, quitting would make it harder to remain sober and  
17 13% wouldn't be able to control their cravings for other substances if they quit smoking  
18 (101).

### 24 ***Sense of autonomy***

25  
26 Participants across seven studies reported that smoking provided a sense of autonomy,  
27 control (56, 58, 68, 83, 93, 97, 98) and power (99) over lives that were often chaotic and out  
28 of control. On the other hand, participants with mental illness identified the lack of control  
29 they had over smoking as a barrier to quitting (102).

### 33 ***Low confidence and perceived difficulty of quitting***

34  
35 Low self-efficacy (52, 93, 106, 107) and low confidence (92, 97, 112) was reported in seven  
36 studies. The belief that willpower was the single-most important factor needed to successfully  
37 quit was reported in five studies (51, 52, 64, 67, 69). Participants also reported that the  
38 process of quitting smoking was too hard (52, 80, 96, 98), including 73.5% of prisoners and  
39 ex-prisoners surveyed (109) and 58% of individuals with a substance use disorder (101).

40  
41 Smokers with depression reported it was hopeless to try to quit (102). However, the opposite  
42 was reported by a sample of former miners, who maintained they were able to stop smoking  
43 at will, with minimal difficulty and need for support (71). Twenty five percent of individuals  
44 with substance abuse disorder said they did not know how to quit (101).

### 51 ***Perceived cognitive benefits of smoking***

52  
53 Enhanced concentration and other cognitive benefits associated with smoking were reported  
54 in six studies (51, 83, 90, 93-95), including 56% of individuals with a substance use disorder  
55 (101).

### 58 ***Combatting loneliness***

59  
60 Smoking provided a way of reducing loneliness in six studies (52, 59, 65, 93, 97, 98);  
providing companionship (93) and was described as a friend (52, 98) by participants.

### ***Perceived low individual risk of harm***

Whilst most of the studies reported that participants had good knowledge of the health risks associated with smoking, low levels of knowledge about the risks of smoking were identified as barriers to cessation (58, 87, 95, 97) including one study conducted with pregnant women (58) and two studies conducted with Indigenous Australian pregnant women (80, 87). Low knowledge of the risks of smoking whilst pregnant were also identified (58, 87). In a study conducted with former miners, participants were more likely to attribute their current health issues to coal dust exposure, rather than smoking. Additionally, participants rationalised continuing smoking by weighing the risks of smoking in comparison to the risks of coal mining (71).

### ***Low motivation***

Low levels of motivation to quit smoking were reported in four studies, all of which were carried out with participants who were diagnosed with a mental illness (92, 94, 97, 98). Additionally, 38% of individuals from a low income areas (70) and 47% of individuals diagnosed with a substance use disorder (101) also reported low levels of motivation to quit.

### ***Failed past quit attempts***

Past failed attempts to quit smoking were identified as barriers to future attempts in two qualitative studies (61, 74) as was a sense of hopelessness after trying many methods and remaining unsuccessful (87).

### ***Positive smoker image***

Two studies within low income samples reported associations between smoking and perceptions of being cool and sophisticated (29, 57) and one study with persons with a mental illness found that participants believed that non-smokers do not have as much fun as smokers (97). In a sample of young people with mental illness, positive media images were also reported as barriers to quitting (103).

### **Social and community networks**

#### ***High prevalence and acceptability of smoking in community***

Eight qualitative (53, 54, 69, 75, 79, 80, 98, 111) and four quantitative (60, 101, 107, 109) studies found that being around other smokers was a barrier to quitting. This finding is compounded by participants describing the high prevalence of smoking amongst family and friends in 23 studies (29, 51, 52, 56, 62, 68, 69, 72, 74, 76, 81, 83, 85-87, 90, 93, 95, 96, 103, 105, 111, 112) and in the wider community in 18 studies (29, 51, 52, 56, 62, 66, 69, 72, 74, 76, 81, 83, 85-87, 93, 96, 112). Tobacco was readily available and easily accessible within disadvantaged communities (51, 62, 66, 76, 83, 90, 91, 111) and smoking was considered to

1  
2  
3 be a highly acceptable (29, 79, 81-83, 85-87) and normalised behaviour (52, 56, 62, 66, 69,  
4 79, 81-83, 85, 87).

### 7 ***Lack of social support***

8  
9 A lack of social support to quit smoking was reported in 12 studies (29, 56, 58, 64, 67, 68,  
10 75, 79, 84, 98, 107, 108) and a lack of support from family and friends in particular was a  
11 barrier in 14 qualitative studies (49, 54, 55, 58, 69, 74, 75, 77, 79, 83, 84, 87, 91, 94). In one  
12 quantitative study, only 21% of homeless individuals agreed that close friends or family  
13 would be helpful in quitting smoking and only 29% believed that close friends and family  
14 wanted them to quit very much (106). Similarly, 26% of homeless respondents cited a lack of  
15 support during a quit attempt as a barrier to successfully quit (107).

### 21 ***Smoking as a social activity***

22  
23 Tobacco use and socialising were linked in two quantitative studies (88, 100) and 20  
24 qualitative studies (29, 49, 53, 57, 62, 73-75, 79, 80, 85, 87, 89, 90, 92, 93, 95, 97, 98, 103):  
25 where participants reported that using tobacco helped to facilitate social connections amongst  
26 family, friends and strangers.

### 30 ***Lack of health and other professional support to quit***

31  
32 Thirteen qualitative studies (52, 55, 56, 58, 74, 77, 83, 86, 91, 92, 95, 108, 112) and one  
33 quantitative study (109) reported a perceived lack of support from health professionals  
34 regarding smoking cessation. Cases of family members and health professionals actively  
35 discouraging quit attempts and encouraging maintenance of smoking due to concerns about  
36 the individual's mental health (92, 93, 95, 96, 112) or because smoking was perceived to be  
37 the individual's only source of enjoyment (54, 77, 79, 83) were reported. Three studies  
38 identified tobacco use by health professionals and others involved in the participants' care as  
39 a barrier to cessation (77, 95, 109) and one study reported service staff providing cigarettes to  
40 homeless clients as a barrier (112). Over half (55.9%) of prisoners surveyed reported  
41 observing members of staff smoking as a barrier to quitting (109). Participants also reported  
42 that cigarettes were used as a way to reward or punish behaviour by health professionals and  
43 other service providers (93, 95, 96, 110). Twenty-nine percent of prisoners also indicated  
44 that not receiving cessation support from prison staff prevented them from quitting smoking  
45 (109). Twenty-six percent of substance abusing individuals reported they did not have  
46 enough support to quit. The study involving at risk youth identified mixed messages sent by  
47 those in places of authority (for example teachers, members of the police force) also acted as  
48 a barrier for at risk youth (111).

## **Living and working conditions**

### ***Access to resources to quit***

Thirteen studies cited the cost of Nicotine Replacement Therapy (NRT) and other pharmacological interventions as a barrier to access that directly prevented cessation (52, 55, 61, 68, 69, 73, 74, 78, 81, 93, 96, 98, 108). Cost was also a barrier for 40% of participants diagnosed with substance abuse disorder (101). There was also poor knowledge and low uptake of programs available to participants (52, 56, 61-63, 72, 74, 78, 86, 96, 108, 110). Social and geographical isolation were reported in four studies as barriers to quitting (56, 62, 64, 85). Geographical isolation referred to the lack of access to cessation services that rural and remote communities experience. Social isolation referred to the racial and economic segregation that separates disadvantaged neighbourhoods and individuals from others (56) further contributing to differences in perceived acceptability and prevalence of tobacco use (62, 85). Unsafe neighbourhoods also limited unnecessary outings and inhibited accessing smoking cessation support (56).

### ***Boredom and limited structure in day to day life***

Fourteen qualitative studies (50-52, 54, 55, 65, 75, 86, 94, 95, 97, 99, 108, 110) and four quantitative studies (60, 79, 88, 90) indicated that smoking alleviated boredom. Limited opportunities for leisure and high levels of unemployment often meant that participants had large amounts of free time and smoking was used to mark the transition from one task or part of the day to another (56, 59, 93, 97, 102, 108).

### ***Concerns regarding cessation treatment and services***

Ten qualitative studies reported that participants were reluctant to access psychological or pharmacological resources to quit smoking due to a belief that these treatments were largely ineffective (56, 58, 61-63, 69, 72, 80, 81, 97). In one survey almost a third (31%) of homeless participants reported that no existing pharmacological treatments would be able to help them stop smoking (107).

The possible side effects of pharmacological interventions (50, 73, 78, 81, 105, 108), uncertainty about the correct use of pharmacological interventions (52, 81, 108); or the possible interactions between NRT and other medications (108) presented barriers to cessation. Participants in one study reported reluctance to add NRT on top of the medications they were already using (105). Homeless participants in one study expressed concerns about the possibility of becoming addicted to NRT (108). Concerns about existing treatment services included lack of continuity of care(91); being capable of addressing smoking simultaneously with mental health issues (91, 93, 96); cultural appropriateness (74, 77, 78,

1  
2  
3 86); feeling judged by programs (61, 67, 91, 93) and a cynicism regarding the medical  
4 profession (77). Telephone quitlines were not viewed as culturally appropriate resources (77)  
5 and participants were sceptical of the effectiveness of quitline support (52).  
6  
7

### 8 *Stressful factors*

9  
10 Participants across ten studies (56, 58, 59, 62, 63, 65, 68, 74, 75, 85) reported that increased  
11 stress due to the events and life circumstances intrinsically linked to their socioeconomic  
12 position were barriers to quitting smoking. The following situations compounded feelings of  
13 stress, hopelessness and meant that cessation was not prioritised: unemployment (56, 58, 59,  
14 62, 63, 65, 68, 85); poverty and financial stress (62, 65, 75, 85); housing issues including  
15 substandard housing, homelessness and overcrowding (56, 58, 75, 85); violence and crime  
16 (56, 62, 68, 75); drug use (56, 62, 75); increased morbidity and mortality (68, 74, 75, 85);  
17 chronic disease (74, 75); low education (65, 75); and limited recreational activities (62, 65).  
18  
19

20  
21 Two studies carried out with Indigenous Australians found that additional stressors  
22 experienced by this group included racism, stigma, dispossession of traditional lands, high  
23 burden of illness, premature deaths within the community and collective grief and loss  
24 relating to the Stolen Generation and the removal of children (74, 75, 85). Unique stressors  
25 facing prisoners including; transfers within and across prisons; legal matters; bullying;  
26 missing family; and restricted movement for most of the day were also identified (110).  
27  
28

### 29 *Living and working environments*

30  
31 Participants reported lack of control over exposure to smoking due to others smoking in the  
32 home; a lack of smoke free policies or policies that did not cover the whole environment or  
33 were only partially enforced were barriers to quitting smoking (54, 58, 74, 96, 103, 107). In  
34 one study involving prisoners, 59% of participants reported that the 'smoky atmosphere'  
35 within the prison was a barrier to quitting (109). Work environments that were conducive to  
36 smoking also presented a barrier in one study (29).  
37  
38

### 39 **Cultural, socioeconomic and environmental factors**

#### 40 *Cultural norms*

41  
42 The importance of tobacco use in traditional and ceremonial contexts was expressed in three  
43 studies concerning American Indian participants (72, 73, 82) and one study including  
44 Aboriginal and Torres Strait Islander participants (85) and one study including Alaska Native  
45 participants (86). Cultural values of self-reliance, pride and independence prevented  
46 American Indian participants from seeking cessation support in two studies (81, 82) and in  
47 one study with low income African Americans (56). Historical factors including  
48 dispossession of land, colonisation and collective grief and loss of cultural identity were  
49  
50  
51  
52  
53  
54  
55  
56  
57  
58  
59  
60

1  
2  
3 reported as barriers to cessation in three studies of Aboriginal and Torres Strait Islanders (74,  
4 75, 85). Studies carried out with American Indian participants (73, 82) and Aboriginal and  
5 Torres Strait Islanders (74, 75, 83, 85) highlighted the function of smoking as a way of  
6 maintaining cultural identity and belonging. Maintenance of identity and belonging were also  
7 reported in three studies concerning people with a mental illness (93, 94, 98) and one study  
8 carried out with low income participants in the UK (62). In prison settings, use of cigarettes  
9 as a substitute currency also provided a barrier to cessation (110).

### 16 *Socioeconomic factors*

17 Two qualitative studies reported participants linking their status as smokers and their inability  
18 to quit smoking with their lower socioeconomic position (65, 97). In a study conducted with  
19 people with a mental illness, participants endorsed the belief that non-smokers were able to  
20 refrain from becoming smokers because they were more advantaged (97) and in a study of  
21 low income women, participants referred to their low socioeconomic position and poverty as  
22 a barrier to quitting smoking (65).  
23  
24  
25  
26  
27  
28  
29  
30  
31  
32  
33  
34  
35  
36  
37  
38  
39  
40  
41  
42  
43  
44  
45  
46  
47  
48  
49  
50  
51  
52  
53  
54  
55  
56  
57  
58  
59  
60
